# Supplementary material for: Eltrombopag as an Allosteric Inhibitor of the METTL3-14 Complex Affecting the m6A Methylation of RNA in Acute Myeloid Leukemia Cells
Source: Pharmaceuticals (Basel). 2022 Apr 1;15(4):440. doi: 10.3390/ph15040440 (PMC9032718; doi:10.3390/ph15040440)
Supplement: Supplementary file 1 [file pharmaceuticals-15-00440-s001.zip]

Archive with 4 entries (4 files):
- pharmaceuticals-1632371-supplementary/Revise_pharmaceuticals-1632371 - sup.pdf
- pharmaceuticals-1632371-supplementary/Supplementary Table S1.xlsx
- pharmaceuticals-1632371-supplementary/Supplementary Table S2.xlsx
- pharmaceuticals-1632371-supplementary/Supplementary Table S3.xlsx
