# Supplementary material for: Eltrombopag as an Allosteric Inhibitor of the METTL3-14 Complex Affecting the m6A Methylation of RNA in Acute Myeloid Leukemia Cells
Source: Pharmaceuticals (Basel). 2022 Apr 1;15(4):440. doi: 10.3390/ph15040440 (PMC9032718; doi:10.3390/ph15040440)
Supplement: Supplementary file 1 [file pharmaceuticals-15-00440-s001.zip › pharmaceuticals-1632371-supplementary/Supplementary Table S1.xlsx]

## Sheet: Sheet1
Supplementary Table S1. Differential m6A methylation sites and peak annotation in Eltrombopag-treated Molm-13 cells.
# chr	chromStart	chromEnd	name	Nearest Ensembl	Gene Name	Gene Description	score	strand	thickStart	thickEnd	itemRgb	blockCount	blockSizes	blockStarts	diff.lg.fdr	diff.lg.p	diff.log2.fc	Annotation	Detailed Annotation	Distance to TSS	Nearest PromoterID	Entrez ID	Nearest Unigene	Nearest Refseq	Gene Type
1	245687631	245687931	ENSG00000162849	ENSG00000232192	KIF26B-AS1	KIF26B antisense RNA 1	0.011	+	245687631	245687931	0	1	300,	0	-3.71	-4.48	-5.98	exon (NM_018012, exon 12 of 15)	exon (NM_018012, exon 12 of 15)	-453264	NR_151721	111216275	Hs.663694	NR_151721	ncRNA
1	2191833	2191924	ENSG00000162585	ENSG00000162585	FAAP20	FA core complex associated protein 20	0.036	-	2191833	2191924	0	1	91,	0	-2.68	-3.32	-5.52	TTS (NM_001256946)	TTS (NM_001256946)	2893	NM_182533	199990	Hs.107101	NM_182533	protein-coding
1	841844	841965	ENSG00000228794	ENSG00000228794	LINC01128	long intergenic non-protein coding RNA 1128	0.038	+	841844	841965	0	1	121,	0	-2.65	-3.28	-4.86	non-coding (NR_047526, exon 3 of 3)	non-coding (NR_047526, exon 3 of 3)	14107	NR_047525	643837	Hs.133183	NR_015368	ncRNA
1	211417500	211417934	ENSG00000236809		LINC00467	long intergenic non-protein coding RNA 467	0.068	+	211417500	211417934	0	2	120,238,	0,196	-2.13	-2.69	-4.85	intron (NR_026761, intron 4 of 5)	intron (NR_026761, intron 4 of 5)	34962	NR_026761	84791	Hs.523932	NM_032705	ncRNA
1	165769163	165797799	ENSG00000143183		TMCO1-AS1	TMCO1 antisense RNA 1	0.054	-	165769163	165797799	0	2	17,103,	0,28533	-2.32	-2.91	-4.81	Intergenic	L1PA4|LINE|L1	14552	NR_125374	100147773	Hs.633824	NR_125374	ncRNA
1	229258694	229258962	ENSG00000177788	ENSG00000168118	RAB4A	RAB4A, member RAS oncogene family	0.11	-	229258694	229258962	0	1	268,	0	-1.73	-2.21	-4.32	non-coding (NR_149312, exon 3 of 3)	non-coding (NR_149312, exon 3 of 3)	-12234	NM_001271998	5867	Hs.296169	NM_004578	protein-coding
1	16515512	16515693	ENSG00000285853	ENSG00000206652	RNU1-1	RNA, U1 small nuclear 1	0.04	+	16515512	16515693	0	1	181,	0	-2.59	-3.22	-4.21	Intergenic	MER41E|LTR|ERV1	-1318	NR_004430	26871		NR_004430	snRNA
1	16515513	16515694	ENSG00000261135	ENSG00000206652	RNU1-1	RNA, U1 small nuclear 1	0.04	+	16515513	16515694	0	1	181,	0	-2.59	-3.22	-4.21	Intergenic	MER41E|LTR|ERV1	-1319	NR_004430	26871		NR_004430	snRNA
1	246987685	246988043	ENSG00000197472	ENSG00000197472	ZNF695	zinc finger protein 695	0.069	-	246987685	246988043	0	1	358,	0	-2.11	-2.67	-3.91	exon (NM_020394, exon 4 of 4)	exon (NM_020394, exon 4 of 4)	20193	NR_037892	57116	Hs.669893	NM_020394	protein-coding
1	52033883	52034003	ENSG00000117862	ENSG00000198841	KTI12	KTI12 chromatin associated homolog	0.099	-	52033883	52034003	0	1	120,	0	-1.81	-2.31	-3.62	promoter-TSS (NM_138417)	promoter-TSS (NM_138417)	-133	NM_138417	112970	Hs.476033	NM_138417	protein-coding
1	169486369	169486986	ENSG00000213062	ENSG00000117479	SLC19A2	solute carrier family 19 member 2	0.023	+	169486369	169486986	0	1	617,	0	-3.09	-3.79	-3.46	promoter-TSS (NM_001319667)	promoter-TSS (NM_001319667)	-708	NM_001319667	10560	Hs.30246	NM_006996	protein-coding
1	246684744	246685015	ENSG00000260698	ENSG00000143653	SCCPDH	saccharopine dehydrogenase (putative)	0.14	+	246684744	246685015	0	1	271,	0	-1.54	-1.99	-3.43	Intergenic	LTR7C|LTR|ERV1	-39529	NM_016002	51097	Hs.498397	NM_016002	protein-coding
1	40040262	40040412	ENSG00000131236	ENSG00000131236	CAP1	cyclase associated actin cytoskeleton regulatory protein 1	0.12	+	40040262	40040412	0	1	150,	0	-1.62	-2.09	-3.37	promoter-TSS (NM_001350482)	promoter-TSS (NM_001350482)	-246	NM_001105530	10487	Hs.370581	NM_006367	protein-coding
1	39414219	39414490	ENSG00000127603	ENSG00000127603	KIAA0754	KIAA0754	0.0024	+	39414219	39414490	0	1	271,	0	-5.1	-6.02	-3.27	exon (NM_015038, exon 1 of 1)	exon (NM_015038, exon 1 of 1)	5282	NM_015038	643314	Hs.658760	NM_015038	protein-coding
1	100895520	100895789	ENSG00000162694	ENSG00000162695	SLC30A7	solute carrier family 30 member 7	0.14	-	100895520	100895789	0	1	269,	0	-1.51	-1.95	-3.19	promoter-TSS (NM_001261441)	promoter-TSS (NM_001261441)	-435	NM_001144884	148867	Hs.533903	NM_133496	protein-coding
1	25248121	25248293	ENSG00000272432	ENSG00000117616	RSRP1	arginine and serine rich protein 1	0.064	+	25248121	25248293	0	1	172,	0	-2.18	-2.75	-3.15	promoter-TSS (NR_135143)	promoter-TSS (NR_135143)	-688	NR_135785	57035	Hs.259412	NM_020317	protein-coding
1	222592262	222592411	ENSG00000225265	ENSG00000225265	TAF1A-AS1	TAF1A antisense RNA 1	0.16	+	222592262	222592411	0	1	149,	0	-1.42	-1.85	-3.11	non-coding (NR_110613, exon 3 of 3)	non-coding (NR_110613, exon 3 of 3)	2378	NR_110614	100506161	Hs.553851	NR_110613	ncRNA
1	220831233	220832225	ENSG00000238078	ENSG00000238078	LINC01352	long intergenic non-protein coding RNA 1352	0.08	+	220831233	220832225	0	2	150,113,	0,879	-1.99	-2.52	-3.03	intron (NR_110797, intron 3 of 3)	MER102b|DNA|hAT-Charlie	2474	NR_110797	101929730	Hs.398159	NR_110797	ncRNA
1	231944939	231945204	ENSG00000226758	ENSG00000226758	DISC1-IT1	DISC1 intronic transcript 1	0.18	+	231944939	231945204	0	1	265,	0	-1.33	-1.73	-2.98	non-coding (NR_126441, exon 4 of 4)	non-coding (NR_126441, exon 4 of 4)	19238	NR_126441	104472714		NR_126441	ncRNA
1	232985562	232986042	ENSG00000135749	ENSG00000135778	NTPCR	nucleoside-triphosphatase, cancer-related	0.002	-	232985562	232986042	0	1	480,	0	-5.26	-6.2	-2.95	intron (NM_014801, intron 33 of 33)	intron (NM_014801, intron 33 of 33)	34960	NR_138027	84284	Hs.642715	NM_032324	protein-coding
1	16467736	16467886	ENSG00000226029	ENSG00000226029	LINC01772	long intergenic non-protein coding RNA 1772	0.078	+	16467736	16467886	0	1	150,	0	-2.01	-2.55	-2.93	non-coding (NR_147210, exon 2 of 2)	non-coding (NR_147210, exon 2 of 2)	6004	NR_147211	107984921	Hs.528312	NR_147210	ncRNA
1	247184945	247185333	ENSG00000215795	ENSG00000196418	ZNF124	zinc finger protein 124	0.17	-	247184945	247185333	0	1	388,	0	-1.37	-1.79	-2.91	Intergenic	Intergenic	-13122	NM_001297569	7678	Hs.421238	NM_003431	protein-coding
1	30718979	30719130	ENSG00000162510	ENSG00000186056	MATN1-AS1	MATN1 antisense RNA 1	0.04	-	30718979	30719130	0	1	151,	0	-2.58	-3.21	-2.9	non-coding (NR_034182, exon 1 of 4)	non-coding (NR_034182, exon 1 of 4)	283	NR_034182	100129196	Hs.659751	NR_034182	ncRNA
1	30718980	30719130	ENSG00000186056	ENSG00000186056	MATN1-AS1	MATN1 antisense RNA 1	0.04	+	30718980	30719130	0	1	150,	0	-2.58	-3.21	-2.9	non-coding (NR_034182, exon 1 of 4)	non-coding (NR_034182, exon 1 of 4)	283	NR_034182	100129196	Hs.659751	NR_034182	ncRNA
1	165769197	165769287	ENSG00000224358		TMCO1-AS1	TMCO1 antisense RNA 1	0.1	+	165769197	165769287	0	1	90,	0	-1.79	-2.29	-2.81	promoter-TSS (NM_019026)	promoter-TSS (NM_019026)	313	NR_125374	100147773	Hs.633824	NR_125374	ncRNA
1	161433473	161440906	ENSG00000283317	ENSG00000143226	FCGR2A	Fc fragment of IgG receptor IIa	0.0026	-	161433473	161440906	0	2	422,27,	0,7406	-5.03	-5.94	-2.75	Intergenic	HERVL-int|LTR|ERVL	-68267	NM_001136219	2212	Hs.352642	NM_021642	protein-coding
1	2350888	2351275	ENSG00000269896	ENSG00000269896	LOC100129534	small nuclear ribonucleoprotein polypeptide N pseudogene	0.17	-	2350888	2351275	0	1	387,	0	-1.38	-1.8	-2.64	non-coding (NR_024489, exon 1 of 1)	non-coding (NR_024489, exon 1 of 1)	1579	NR_024489	100129534	Hs.655313	NM_001127577	pseudo
1	178022444	178022625	ENSG00000254154		CRYZL2P-SEC16B	CRYZL2P-SEC16B readthrough	0.16	-	178022444	178022625	0	1	181,	0	-1.4	-1.83	-2.58	non-coding (NR_037167, exon 9 of 10)	non-coding (NR_037167, exon 9 of 10)	15441	NR_151492	111240474		NM_001356505	protein-coding
1	39769582	39769972	ENSG00000198754	ENSG00000198754	OXCT2	3-oxoacid CoA-transferase 2	0.012	-	39769582	39769972	0	1	390,	0	-3.69	-4.46	-2.55	exon (NM_022120, exon 1 of 1)	exon (NM_022120, exon 1 of 1)	1571	NM_022120	64064	Hs.472491	NM_022120	protein-coding
1	39962853	39962912	ENSG00000228477	ENSG00000168389	MFSD2A	major facilitator superfamily domain containing 2A	0.11	+	39962853	39962912	0	1	59,	0	-1.76	-2.25	-2.51	intron (NM_032793, intron 3 of 13)	intron (NM_032793, intron 3 of 13)	7738	NM_001349821	84879	Hs.655177	NM_032793	protein-coding
1	1314144	1314775	ENSG00000127054	ENSG00000283712	MIR6727	microRNA 6727	3.1e-09	-	1314144	1314775	0	1	631,	0	-17.8	-19.6	-2.49	intron (NM_001256463, intron 5 of 14)	intron (NM_001256463, intron 5 of 14)	-1894	NR_106785	102465435		NR_106785	ncRNA
1	101085125	101087208	ENSG00000233184		LOC102606465	uncharacterized LOC102606465	2.5e-08	+	101085125	101087208	0	2	32,357,	0,1726	-15.9	-17.5	-2.47	intron (NR_109849, intron 4 of 4)	AluSx|SINE|Alu	60321	NR_109849	102606465	Hs.593669	NR_109849	ncRNA
1	113871639	113871759	ENSG00000134242	ENSG00000134242	PTPN22	protein tyrosine phosphatase non-receptor type 22	0.0029	-	113871639	113871759	0	1	120,	0	-4.93	-5.83	-2.41	promoter-TSS (NM_001193431)	promoter-TSS (NM_001193431)	13	NM_015967	26191	Hs.535276	NM_012411	protein-coding
1	182615851	182616390	ENSG00000261504	ENSG00000261504	LINC01686	long intergenic non-protein coding RNA 1686	0.085	+	182615851	182616390	0	1	539,	0	-1.94	-2.46	-2.37	non-coding (NR_036490, exon 1 of 1)	non-coding (NR_036490, exon 1 of 1)	981	NR_036490	284648	Hs.253475	NR_036490	ncRNA
1	16231818	16232027	ENSG00000132881	ENSG00000132881	CPLANE2	ciliogenesis and planar polarity effector 2	0.036	-	16231818	16232027	0	1	209,	0	-2.69	-3.33	-2.36	3' UTR (NM_030907, exon 5 of 5)	3' UTR (NM_030907, exon 5 of 5)	5260	NM_030907	79363	Hs.546430	NM_030907	protein-coding
1	16467734	16467884	ENSG00000080947	ENSG00000226029	LINC01772	long intergenic non-protein coding RNA 1772	0.12	-	16467734	16467884	0	1	150,	0	-1.63	-2.1	-2.35	non-coding (NR_147210, exon 2 of 2)	non-coding (NR_147210, exon 2 of 2)	6002	NR_147211	107984921	Hs.528312	NR_147210	ncRNA
1	43406329	43406750	ENSG00000198198	ENSG00000198198	SZT2	SZT2 subunit of KICSTOR complex	0.00018	+	43406329	43406750	0	1	421,	0	-7.45	-8.6	-2.35	intron (NM_015284, intron 4 of 70)	L2c|LINE|L2	16641	NM_015284	23334	Hs.643560	NM_015284	protein-coding
1	45304149	45304630	ENSG00000281912	ENSG00000281912	LINC01144	long intergenic non-protein coding RNA 1144	0.14	+	45304149	45304630	0	1	481,	0	-1.53	-1.98	-2.29	non-coding (NR_024270, exon 1 of 1)	non-coding (NR_024270, exon 1 of 1)	480	NR_024270	400752	Hs.334348	NR_024270	ncRNA
1	228687590	228687826	ENSG00000234975	ENSG00000202526	RNA5S13	RNA, 5S ribosomal 13	1.5e-10	+	228687590	228687826	0	1	236,	0	-20.7	-22.6	-2.29	intron (NR_037962, intron 1 of 2)	intron (NR_037962, intron 1 of 2)	-41550	NR_023375	100169764		NR_023375	rRNA
1	21453654	21454013	ENSG00000142794	ENSG00000142794	NBPF3	NBPF member 3	0.034	+	21453654	21454013	0	1	359,	0	-2.72	-3.37	-2.27	intron (NM_001330381, intron 3 of 18)	ERVL-E-int|LTR|ERVL	13697	NM_001256416	84224	Hs.325422	NM_032264	protein-coding
1	93869637	93869817	ENSG00000067334	ENSG00000067334	DNTTIP2	deoxynucleotidyltransferase terminal interacting protein 2	0.016	-	93869637	93869817	0	1	180,	0	-3.38	-4.11	-2.25	3' UTR (NM_014597, exon 7 of 7)	3' UTR (NM_014597, exon 7 of 7)	9479	NM_014597	30836	Hs.85769	NM_014597	protein-coding
1	175160005	175160215	ENSG00000235750	ENSG00000235750	KIAA0040	KIAA0040	0.042	-	175160005	175160215	0	1	210,	0	-2.55	-3.17	-2.24	3' UTR (NM_014656, exon 4 of 4)	3' UTR (NM_014656, exon 4 of 4)	32666	NM_001162895	9674	Hs.518138	NM_014656	protein-coding
1	77847346	77847555	ENSG00000235613	ENSG00000162614	NEXN	nexilin F-actin binding protein	0.039	+	77847346	77847555	0	1	209,	0	-2.62	-3.25	-2.23	intron (NM_198549, intron 8 of 15)	A-rich|Low_complexity|Low_complexity	-41064	NM_001172309	91624	Hs.612385	NM_144573	protein-coding
1	45510300	45510690	ENSG00000132763	ENSG00000132763	MMACHC	metabolism of cobalamin associated C	6.8e-08	+	45510300	45510690	0	1	390,	0	-14.8	-16.5	-2.19	TTS (NM_002574)	TTS (NM_002574)	10195	NM_015506	25974	Hs.13024	NM_015506	protein-coding
1	175147255	175147316	ENSG00000120332	ENSG00000235750	KIAA0040	KIAA0040	0.18	+	175147255	175147316	0	1	61,	0	-1.33	-1.74	-2.17	3' UTR (NM_022093, exon 19 of 19)	3' UTR (NM_022093, exon 19 of 19)	45490	NM_001162895	9674	Hs.518138	NM_014656	protein-coding
1	192184380	192184501	ENSG00000285280	ENSG00000150681	RGS18	regulator of G protein signaling 18	0.11	-	192184380	192184501	0	1	121,	0	-1.75	-2.24	-2.16	exon (NM_130782, exon 5 of 5)	exon (NM_130782, exon 5 of 5)	25979	NM_130782	64407	Hs.440890	NM_130782	protein-coding
1	39411129	39412960	ENSG00000127603	ENSG00000127603	KIAA0754	KIAA0754	2.8e-12	+	39411129	39412960	0	1	1831,	0	-24.6	-26.6	-2.14	exon (NM_015038, exon 1 of 1)	exon (NM_015038, exon 1 of 1)	2972	NM_015038	643314	Hs.658760	NM_015038	protein-coding
1	89762035	89762306	ENSG00000171488	ENSG00000171492	LRRC8D	leucine rich repeat containing 8 VRAC subunit D	0.041	+	89762035	89762306	0	1	271,	0	-2.57	-3.19	-2.14	Intergenic	Intergenic	-58861	NM_001134479	55144	Hs.482087	NM_018103	protein-coding
1	2405305	2405754	ENSG00000157911	ENSG00000157911	PEX10	peroxisomal biogenesis factor 10	6.3e-13	-	2405305	2405754	0	1	449,	0	-26.1	-28.1	-2.13	TTS (NM_007033)	TTS (NM_007033)	7041	NM_002617	5192	Hs.732228	NM_002617	protein-coding
1	153977772	153978599	ENSG00000272654	ENSG00000143543	JTB	jumping translocation breakpoint	4.1e-06	+	153977772	153978599	0	1	827,	0	-11	-12.4	-2.09	promoter-TSS (NM_006694)	promoter-TSS (NM_006694)	-512	NM_006694	10899	Hs.6396	NM_006694	protein-coding
1	145963397	145964283	ENSG00000272031	ENSG00000272031	ANKRD34A	ankyrin repeat domain 34A	0.019	-	145963397	145964283	0	2	140,100,	0,786	-3.24	-3.95	-2.08	promoter-TSS (NM_001330685)	promoter-TSS (NM_001330685)	735	NM_001039888	284615	Hs.620591	NM_001039888	protein-coding
1	1315104	1316194	ENSG00000127054	ENSG00000283712	MIR6727	microRNA 6727	1.5e-11	-	1315104	1316194	0	2	593,38,	0,1052	-22.9	-24.9	-2.05	intron (NM_001256463, intron 2 of 14)	intron (NM_001256463, intron 2 of 14)	-3083	NR_106785	102465435		NR_106785	ncRNA
1	247526234	247527223	ENSG00000196242	ENSG00000284824	GCSAML-AS1	GCSAML antisense RNA 1	0.015	-	247526234	247527223	0	1	989,	0	-3.45	-4.19	-2.05	non-coding (NR_027309, exon 3 of 4)	non-coding (NR_027309, exon 3 of 4)	4075	NR_027309	148824	Hs.23491	NR_027309	ncRNA
1	16441431	16441522	ENSG00000157191	ENSG00000157191	NECAP2	NECAP endocytosis associated 2	0.17	+	16441431	16441522	0	1	91,	0	-1.36	-1.77	-2.04	intron (NM_018090, intron 1 of 7)	intron (NM_018090, intron 1 of 7)	753	NM_018090	55707	Hs.437385	NM_018090	protein-coding
1	21454132	21459873	ENSG00000142794	ENSG00000142794	NBPF3	NBPF member 3	0.019	+	21454132	21459873	0	2	174,125,	0,5616	-3.23	-3.94	-2.02	intron (NM_001330381, intron 3 of 18)	L1ME1|LINE|L1	16866	NM_001256416	84224	Hs.325422	NM_032264	protein-coding
1	2405293	2405444	ENSG00000157916	ENSG00000157911	PEX10	peroxisomal biogenesis factor 10	2.8e-06	+	2405293	2405444	0	1	151,	0	-11.4	-12.8	-2	TTS (NM_007033)	TTS (NM_007033)	7202	NM_002617	5192	Hs.732228	NM_002617	protein-coding
1	50440260	50440650	ENSG00000185104	ENSG00000142700	DMRTA2	DMRT like family A2	0.0018	-	50440260	50440650	0	1	390,	0	-5.35	-6.3	-1.99	3' UTR (NM_007051, exon 19 of 19)	3' UTR (NM_007051, exon 19 of 19)	-17012	NM_032110	63950	Hs.334481	NM_032110	protein-coding
1	151790906	151791236	ENSG00000182134	ENSG00000203288	TDRKH-AS1	TDRKH antisense RNA 1	0.027	-	151790906	151791236	0	1	330,	0	-2.93	-3.61	-1.98	promoter-TSS (NM_001083964)	promoter-TSS (NM_001083964)	322	NR_146292	109729141	Hs.439525	NR_146292	ncRNA
1	178022487	178022637	ENSG00000242193		CRYZL2P-SEC16B	CRYZL2P-SEC16B readthrough	0.091	-	178022487	178022637	0	1	150,	0	-1.88	-2.4	-1.97	non-coding (NR_037167, exon 9 of 10)	non-coding (NR_037167, exon 9 of 10)	15414	NR_151492	111240474		NM_001356505	protein-coding
1	159833108	159835841	ENSG00000158714	ENSG00000158714	SLAMF8	SLAM family member 8	0.0017	+	159833108	159835841	0	3	73,108,658,	0,153,2075	-5.4	-6.36	-1.96	TTS (NR_147122)	TTS (NR_147122)	7602	NM_020125	56833	Hs.438683	NM_020125	protein-coding
1	2563620	2563800	ENSG00000157873	ENSG00000228037	LOC100996583	uncharacterized LOC100996583	0.07	+	2563620	2563800	0	1	180,	0	-2.1	-2.66	-1.95	3' UTR (NM_001297605, exon 7 of 7)	3' UTR (NM_001297605, exon 7 of 7)	-2825	NR_121638	100996583	Hs.444114	NR_121638	ncRNA
1	42457524	42459280	ENSG00000127125	ENSG00000127125	PPCS	phosphopantothenoylcysteine synthetase	0.0011	+	42457524	42459280	0	2	43,77,	0,1679	-5.83	-6.83	-1.94	intron (NM_001287507, intron 2 of 2)	intron (NM_001287507, intron 2 of 2)	1859	NM_024664	79717	Hs.706662	NM_024664	protein-coding
1	53213298	53213418	ENSG00000157184	ENSG00000162384	CZIB	CXXC motif containing zinc binding protein	0.048	+	53213298	53213418	0	1	120,	0	-2.43	-3.04	-1.93	TTS (NM_001304760)	TTS (NM_001304760)	7276	NM_017887	54987	Hs.525391	NM_017887	protein-coding
1	89993650	89994001	ENSG00000228175		GEMIN8P4	gem nuclear organelle associated protein 8 pseudogene 4	0.15	-	89993650	89994001	0	1	351,	0	-1.47	-1.91	-1.91	non-coding (NR_002830, exon 1 of 1)	non-coding (NR_002830, exon 1 of 1)	1140	NR_002830	492303	Hs.550796	NR_002830	pseudo
1	159835181	159835848	ENSG00000188004	ENSG00000158714	SLAMF8	SLAM family member 8	0.013	-	159835181	159835848	0	2	40,499,	0,168	-3.59	-4.35	-1.91	non-coding (NR_147122, exon 4 of 4)	non-coding (NR_147122, exon 4 of 4)	8642	NM_020125	56833	Hs.438683	NM_020125	protein-coding
1	149834178	149839648	ENSG00000270882	ENSG00000270276	HIST2H4B	histone cluster 2 H4 family member b	0.18	+	149834178	149839648	0	2	453,54,	0,5416	-1.32	-1.72	-1.9	Intergenic	Intergenic	4256	NM_001034077	554313	Hs.55468	NM_001034077	protein-coding
1	159835193	159835824	ENSG00000256029	ENSG00000158714	SLAMF8	SLAM family member 8	0.0074	-	159835193	159835824	0	1	631,	0	-4.08	-4.9	-1.89	non-coding (NR_147122, exon 4 of 4)	non-coding (NR_147122, exon 4 of 4)	8636	NM_020125	56833	Hs.438683	NM_020125	protein-coding
1	45618513	45618844	ENSG00000132780	ENSG00000159588	CCDC17	coiled-coil domain containing 17	0.0014	+	45618513	45618844	0	1	331,	0	-5.6	-6.57	-1.88	3' UTR (NM_001195193, exon 13 of 13)	3' UTR (NM_001195193, exon 13 of 13)	5375	NM_001190182	149483	Hs.18912	NM_152500	protein-coding
1	89626771	89632179	ENSG00000231999	ENSG00000231999	LRRC8C-DT	LRRC8C divergent transcript	0.0013	-	89626771	89632179	0	2	55,304,	0,5104	-5.63	-6.61	-1.86	intron (NR_033981, intron 2 of 2)	intron (NR_033981, intron 2 of 2)	3419	NR_033981	400761	Hs.741594	NR_033981	ncRNA
1	145848390	145848539	ENSG00000186364	ENSG00000278549	MIR6736	microRNA 6736	0.0045	+	145848390	145848539	0	1	149,	0	-4.55	-5.41	-1.86	TTS (NM_006099)	TTS (NM_006099)	2180	NR_106794	102466191		NR_106794	ncRNA
1	246986522	246987418	ENSG00000197472	ENSG00000197472	ZNF695	zinc finger protein 695	0.0057	-	246986522	246987418	0	1	896,	0	-4.32	-5.17	-1.86	exon (NM_020394, exon 4 of 4)	exon (NM_020394, exon 4 of 4)	21087	NR_037892	57116	Hs.669893	NM_020394	protein-coding
1	151790891	151791242	ENSG00000203288	ENSG00000203288	TDRKH-AS1	TDRKH antisense RNA 1	0.035	+	151790891	151791242	0	1	351,	0	-2.69	-3.34	-1.85	promoter-TSS (NM_001083964)	promoter-TSS (NM_001083964)	318	NR_146292	109729141	Hs.439525	NR_146292	ncRNA
1	154212182	154212243	ENSG00000143612	ENSG00000163263	C1orf189	chromosome 1 open reading frame 189	0.091	-	154212182	154212243	0	1	61,	0	-1.89	-2.4	-1.85	3' UTR (NM_001297721, exon 5 of 5)	3' UTR (NM_001297721, exon 5 of 5)	-5880	NM_001010979	388701	Hs.104967	NM_001010979	protein-coding
1	206099731	206102399	ENSG00000263961	ENSG00000198049	AVPR1B	arginine vasopressin receptor 1B	8.4e-10	+	206099731	206102399	0	3	67,62,648,	0,1404,2020	-19.1	-20.9	-1.84	intron (NM_001369490, intron 4 of 5)	intron (NM_001369490, intron 4 of 5)	16323	NM_000707	553	Hs.1372	NM_000707	protein-coding
1	29193141	29194010	ENSG00000116353	ENSG00000116350	SRSF4	serine and arginine rich splicing factor 4	2.5e-05	-	29193141	29194010	0	1	869,	0	-9.28	-10.6	-1.83	non-coding (NR_146212, exon 10 of 10)	non-coding (NR_146212, exon 10 of 10)	-11676	NM_005626	6429	Hs.469970	NM_005626	protein-coding
1	201027742	201028133	ENSG00000229191	ENSG00000116852	KIF21B	kinesin family member 21B	0.00034	+	201027742	201028133	0	1	391,	0	-6.9	-8	-1.81	Intergenic	MIRb|SINE|MIR	-4224	NM_001252100	23046	Hs.169182	NM_017596	protein-coding
1	11295659	11296049	ENSG00000120942	ENSG00000120942	UBIAD1	UbiA prenyltransferase domain containing 1	0.058	+	11295659	11296049	0	1	390,	0	-2.27	-2.85	-1.8	3' UTR (NM_001330350, exon 2 of 2)	3' UTR (NM_001330350, exon 2 of 2)	22656	NM_013319	29914	Hs.522933	NM_013319	protein-coding
1	10431054	10431354	ENSG00000251503	ENSG00000251503	CENPS-CORT	CENPS-CORT readthrough	0.013	+	10431054	10431354	0	1	300,	0	-3.57	-4.33	-1.79	non-coding (NR_036462, exon 1 of 5)	non-coding (NR_036462, exon 1 of 5)	454	NM_001243768	100526739	Hs.412311	NM_198544	protein-coding
1	100873564	100873715	ENSG00000162694	ENSG00000162694	EXTL2	exostosin like glycosyltransferase 2	0.013	-	100873564	100873715	0	1	151,	0	-3.56	-4.32	-1.79	non-coding (NR_048570, exon 6 of 6)	non-coding (NR_048570, exon 6 of 6)	21202	NM_001033025	2135	Hs.357637	NM_001439	protein-coding
1	148297016	148297316	ENSG00000238107	ENSG00000283676	MIR5087	microRNA 5087	0.12	+	148297016	148297316	0	1	300,	0	-1.63	-2.1	-1.79	Intergenic	MLT1A0|LTR|ERVL-MaLR	37388	NR_049810	100847044		NR_049810	ncRNA
1	151281946	151282344	ENSG00000143373	ENSG00000143373	ZNF687	zinc finger protein 687	0.065	+	151281946	151282344	0	2	133,78,	0,320	-2.16	-2.73	-1.79	promoter-TSS (NM_001304763)	promoter-TSS (NM_001304763)	-154	NM_001304763	57592	Hs.186756	NM_020832	protein-coding
1	173823523	173823853	ENSG00000120334	ENSG00000120334	CENPL	centromere protein L	0.0029	-	173823523	173823853	0	1	330,	0	-4.92	-5.83	-1.79	promoter-TSS (NM_001365213)	promoter-TSS (NM_001365213)	444	NM_001171182	91687	Hs.531856	NM_033319	protein-coding
1	10431076	10431376	ENSG00000175279	ENSG00000251503	CENPS-CORT	CENPS-CORT readthrough	0.0091	+	10431076	10431376	0	1	300,	0	-3.9	-4.7	-1.78	non-coding (NR_036462, exon 1 of 5)	non-coding (NR_036462, exon 1 of 5)	476	NM_001243768	100526739	Hs.412311	NM_198544	protein-coding
1	178545342	178547159	ENSG00000213057	ENSG00000213057	C1orf220	chromosome 1 open reading frame 220 (putative)	0.072	+	178545342	178547159	0	2	561,66,	0,1751	-2.08	-2.63	-1.75	intron (NR_033186, intron 2 of 2)	intron (NR_033186, intron 2 of 2)	3455	NR_033186	400798	Hs.668085	NM_207467	ncRNA
1	211271541	211271781	ENSG00000117625	ENSG00000117625	RCOR3	REST corepressor 3	0.0016	+	211271541	211271781	0	1	240,	0	-5.48	-6.45	-1.74	5' UTR (NM_001350070, exon 4 of 13)	5' UTR (NM_001350070, exon 4 of 13)	11714	NM_018254	55758	Hs.356399	NM_018254	protein-coding
1	74205504	74205684	ENSG00000254685	ENSG00000259030	FPGT-TNNI3K	FPGT-TNNI3K readthrough	0.029	+	74205504	74205684	0	1	180,	0	-2.88	-3.55	-1.73	exon (NM_001199328, exon 5 of 5)	exon (NM_001199328, exon 5 of 5)	7382	NM_001112808	100526835	Hs.480085	NM_001112808	protein-coding
1	99969380	99969801	ENSG00000117620	ENSG00000117620	SLC35A3	solute carrier family 35 member A3	0.18	+	99969380	99969801	0	1	421,	0	-1.32	-1.72	-1.72	promoter-TSS (NM_012243)	promoter-TSS (NM_012243)	-405	NM_001271684	23443	Hs.448979	NM_012243	protein-coding
1	22030526	22030748	ENSG00000285794	ENSG00000228397	LINC01635	long intergenic non-protein coding RNA 1635	0.056	+	22030526	22030748	0	1	222,	0	-2.3	-2.89	-1.7	non-coding (NR_023918, exon 2 of 2)	non-coding (NR_023918, exon 2 of 2)	-4589	NR_110692	101928043	Hs.617422	NR_110692	ncRNA
1	112957044	112957555	ENSG00000226419	ENSG00000226419	SLC16A1-AS1	SLC16A1 antisense RNA 1	0.034	+	112957044	112957555	0	1	511,	0	-2.74	-3.39	-1.7	promoter-TSS (NM_003051).2	promoter-TSS (NM_003051).2	885	NR_103743	100506392	Hs.418285	NR_103743	ncRNA
1	222568993	222569262	ENSG00000143498	ENSG00000225265	TAF1A-AS1	TAF1A antisense RNA 1	0.041	-	222568993	222569262	0	1	269,	0	-2.57	-3.2	-1.7	intron (NM_001201536, intron 7 of 11)	L1ME1|LINE|L1	-20792	NR_110613	100506161	Hs.553851	NR_110613	ncRNA
1	21596753	21597054	ENSG00000076864	ENSG00000162551	ALPL	alkaline phosphatase, biomineralization associated	0.076	-	21596753	21597054	0	1	301,	0	-2.03	-2.58	-1.68	3' UTR (NM_001350527, exon 27 of 27)	3' UTR (NM_001350527, exon 27 of 27)	45634	NM_001369803	249	Hs.75431	NM_000478	protein-coding
1	39759517	39759997	ENSG00000116985	ENSG00000198754	OXCT2	3-oxoacid CoA-transferase 2	5e-05	-	39759517	39759997	0	1	480,	0	-8.67	-9.91	-1.68	3' UTR (NM_001720, exon 7 of 7)	3' UTR (NM_001720, exon 7 of 7)	11591	NM_022120	64064	Hs.472491	NM_022120	protein-coding
1	159836003	159836484	ENSG00000256029	ENSG00000158714	SLAMF8	SLAM family member 8	0.11	-	159836003	159836484	0	1	481,	0	-1.71	-2.19	-1.68	3' UTR (NM_001330741, exon 4 of 4)	3' UTR (NM_001330741, exon 4 of 4)	9371	NM_020125	56833	Hs.438683	NM_020125	protein-coding
1	28237710	28237771	ENSG00000130770	ENSG00000130770	ATP5IF1	ATP synthase inhibitory factor subunit 1	0.0088	+	28237710	28237771	0	1	61,	0	-3.93	-4.73	-1.66	3' UTR (NM_178191, exon 2 of 2).2	3' UTR (NM_178191, exon 2 of 2).2	1617	NM_178190	93974	Hs.744914	NM_016311	protein-coding
1	219200032	219200122	ENSG00000225920	ENSG00000143353	LYPLAL1	lysophospholipase like 1	0.14	-	219200032	219200122	0	1	90,	0	-1.54	-1.99	-1.65	intron (NM_001300770, intron 3 of 4)	intron (NM_001300770, intron 3 of 4)	25108	NM_001300772	127018	Hs.657617	NM_138794	protein-coding
1	841395	841665	ENSG00000228794	ENSG00000228794	LINC01128	long intergenic non-protein coding RNA 1128	0.16	+	841395	841665	0	1	270,	0	-1.39	-1.81	-1.63	non-coding (NR_047526, exon 3 of 3)	non-coding (NR_047526, exon 3 of 3)	13732	NR_047525	643837	Hs.133183	NR_015368	ncRNA
1	147173420	147209790	ENSG00000237188		PDIA3P1	protein disulfide isomerase family A member 3 pseudogene 1	0.00065	+	147173420	147209790	0	3	139,162,169,	0,1003,36201	-6.29	-7.34	-1.63	intron (NM_001144830, intron 5 of 6)	L1PA4|LINE|L1	13754	NR_002305	171423	Hs.658566	NR_002305	pseudo
1	41584813	41585264	ENSG00000127124	ENSG00000127129	EDN2	endothelin 2	0.033	-	41584813	41585264	0	1	451,	0	-2.75	-3.4	-1.62	5' UTR (NM_001127714, exon 3 of 8)	5' UTR (NM_001127714, exon 3 of 8)	-100356	NR_126098	1907	Hs.1407	NM_001956	protein-coding
1	159835990	159836500	ENSG00000158714	ENSG00000158714	SLAMF8	SLAM family member 8	0.12	+	159835990	159836500	0	1	510,	0	-1.63	-2.1	-1.62	3' UTR (NM_001330741, exon 4 of 4)	3' UTR (NM_001330741, exon 4 of 4)	9372	NM_020125	56833	Hs.438683	NM_020125	protein-coding
1	99969387	99969805	ENSG00000228084	ENSG00000117620	SLC35A3	solute carrier family 35 member A3	0.18	-	99969387	99969805	0	1	418,	0	-1.31	-1.71	-1.6	promoter-TSS (NM_012243)	promoter-TSS (NM_012243)	-400	NM_001271684	23443	Hs.448979	NM_012243	protein-coding
1	143768274	143768844	ENSG00000242352		LOC105369140	NBPF member 6 pseudogene	0.1	+	143768274	143768844	0	1	570,	0	-1.77	-2.26	-1.6	Intergenic	Intergenic	23724	NR_160530	105369140		NR_160528	pseudo
1	158182123	158182301	ENSG00000158473	ENSG00000158473	CD1D	CD1d molecule	0.014	+	158182123	158182301	0	1	178,	0	-3.52	-4.27	-1.6	exon (NM_001319145, exon 4 of 6)	exon (NM_001319145, exon 4 of 6)	2265	NM_001766	912	Hs.1799	NM_001766	protein-coding
1	1317362	1319101	ENSG00000127054	ENSG00000283712	MIR6727	microRNA 6727	3.7e-05	-	1317362	1319101	0	2	88,423,	0,1316	-8.95	-10.2	-1.58	intron (NM_001256463, intron 2 of 14)	L1MEg|LINE|L1	-5666	NR_106785	102465435		NR_106785	ncRNA
1	15835426	15835695	ENSG00000179743	ENSG00000065526	SPEN	spen family transcriptional repressor	0.15	-	15835426	15835695	0	1	269,	0	-1.46	-1.89	-1.57	non-coding (NR_024279, exon 2 of 2)	non-coding (NR_024279, exon 2 of 2)	-12146	NM_015001	23013	Hs.744843	NM_015001	protein-coding
1	160610278	160612505	ENSG00000117090	ENSG00000066294	CD84	CD84 molecule	0.071	-	160610278	160612505	0	2	520,18,	0,2209	-2.09	-2.64	-1.57	intron (NM_001330754, intron 7 of 7)	intron (NM_001330754, intron 7 of 7)	-31876	NM_001184882	8832	Hs.398093	NM_003874	protein-coding
1	1317580	1317848	ENSG00000240731	ENSG00000283712	MIR6727	microRNA 6727	0.0048	-	1317580	1317848	0	1	268,	0	-4.47	-5.33	-1.56	intron (NM_001256463, intron 2 of 14)	intron (NM_001256463, intron 2 of 14)	-5148	NR_106785	102465435		NR_106785	ncRNA
1	107056738	107058114	ENSG00000198890	ENSG00000198890	PRMT6	protein arginine methyltransferase 6	3.7e-06	+	107056738	107058114	0	1	1376,	0	-11.1	-12.5	-1.56	exon (NM_018137, exon 1 of 1)	exon (NM_018137, exon 1 of 1)	752	NM_018137	55170	Hs.26006	NM_018137	protein-coding
1	147173399	147174681	ENSG00000180867	ENSG00000131778	CHD1L	chromodomain helicase DNA binding protein 1 like	0.00096	+	147173399	147174681	0	2	160,258,	0,1024	-5.94	-6.95	-1.56	intron (NM_001348451, intron 1 of 23)	L3|LINE|CR1	1293	NM_001348451	9557	Hs.191164	NM_004284	protein-coding
1	209782757	209784380	ENSG00000162757	ENSG00000162757	C1orf74	chromosome 1 open reading frame 74	2.8e-06	-	209782757	209784380	0	2	952,3,	0,1620	-11.4	-12.8	-1.55	exon (NM_152485, exon 2 of 2)	exon (NM_152485, exon 2 of 2)	990	NM_152485	148304	Hs.497642	NM_152485	protein-coding
1	212686417	212697012	ENSG00000123685	ENSG00000123685	BATF3	basic leucine zipper ATF-like transcription factor 3	6.8e-05	-	212686417	212697012	0	3	562,43,52,	0,1049,10543	-8.37	-9.59	-1.55	intron (NM_018664, intron 2 of 2)	intron (NM_018664, intron 2 of 2)	8125	NM_018664	55509	Hs.62919	NM_018664	protein-coding
1	6595532	6599440	ENSG00000162413	ENSG00000162413	KLHL21	kelch like family member 21	1.4e-07	-	6595532	6599440	0	2	25,394,	0,3514	-14.2	-15.8	-1.54	intron (NM_001324309, intron 2 of 3)	intron (NM_001324309, intron 2 of 3)	5383	NM_001324309	9903	Hs.7764	NM_014851	protein-coding
1	32207343	32208239	ENSG00000160051	ENSG00000222046	DCDC2B	doublecortin domain containing 2B	4.6e-05	+	32207343	32208239	0	1	896,	0	-8.75	-9.99	-1.54	exon (NM_001160042, exon 5 of 5)	exon (NM_001160042, exon 5 of 5)	-1303	NM_001099434	149069	Hs.424588	NM_001099434	protein-coding
1	11294972	11295511	ENSG00000120942	ENSG00000120942	UBIAD1	UbiA prenyltransferase domain containing 1	0.034	+	11294972	11295511	0	1	539,	0	-2.73	-3.38	-1.51	3' UTR (NM_001330350, exon 2 of 2)	3' UTR (NM_001330350, exon 2 of 2)	22044	NM_013319	29914	Hs.522933	NM_013319	protein-coding
1	228396435	228396645	ENSG00000154370	ENSG00000284311	MIR6742	microRNA 6742	0.14	-	228396435	228396645	0	1	210,	0	-1.51	-1.96	-1.5	TTS (NR_106800)	TTS (NR_106800)	569	NR_106800	102465444		NR_106800	ncRNA
1	1564618	1574509	ENSG00000160075	ENSG00000160075	SSU72	SSU72 homolog, RNA polymerase II CTD phosphatase	2.9e-24	-	1564618	1574509	0	2	298,32,	0,9859	-51.6	-54.2	-1.49	intron (NM_014188, intron 1 of 4)	AluJo|SINE|Alu	5299	NM_014188	29101	Hs.30026	NM_014188	protein-coding
1	119146630	119146751	ENSG00000231365	ENSG00000116874	WARS2	tryptophanyl tRNA synthetase 2, mitochondrial	0.13	+	119146630	119146751	0	1	121,	0	-1.6	-2.06	-1.49	intron (NR_125975, intron 2 of 6)	MER117|DNA|hAT-Charlie	-6019	NM_201263	10352	Hs.523506	NM_015836	protein-coding
1	235330037	235330218	ENSG00000285053	ENSG00000152904	GGPS1	geranylgeranyl diphosphate synthase 1	0.033	+	235330037	235330218	0	1	181,	0	-2.76	-3.41	-1.49	intron (NR_036605, intron 1 of 2)	intron (NR_036605, intron 1 of 2)	1558	NR_036605	9453	Hs.730768	NM_004837	protein-coding
1	192181454	192184592	ENSG00000150681	ENSG00000150681	RGS18	regulator of G protein signaling 18	0.002	+	192181454	192184592	0	2	4,296,	0,2842	-5.29	-6.23	-1.48	intron (NM_130782, intron 4 of 4)	L3|LINE|CR1	24561	NM_130782	64407	Hs.440890	NM_130782	protein-coding
1	214603194	214603537	ENSG00000117724	ENSG00000117724	CENPF	centromere protein F	4.6e-07	+	214603194	214603537	0	2	127,54,	0,289	-13.1	-14.6	-1.48	intron (NM_016343, intron 1 of 19)	CpG	171	NM_016343	1063	Hs.497741	NM_016343	protein-coding
1	109089131	109089429	ENSG00000273382	ENSG00000215717	TMEM167B	transmembrane protein 167B	0.18	-	109089131	109089429	0	1	298,	0	-1.33	-1.74	-1.46	Intergenic	Intergenic	-1484	NM_001322248	56900	Hs.82933	NM_020141	protein-coding
1	45327466	45328533	ENSG00000186603	ENSG00000186603	HPDL	4-hydroxyphenylpyruvate dioxygenase like	0.015	+	45327466	45328533	0	1	1067,	0	-3.43	-4.17	-1.45	exon (NM_032756, exon 1 of 1)	exon (NM_032756, exon 1 of 1)	1105	NM_032756	84842	Hs.162717	NM_032756	protein-coding
1	228650420	228650660	ENSG00000183929	ENSG00000202526	RNA5S13	RNA, 5S ribosomal 13	0.16	+	228650420	228650660	0	1	240,	0	-1.39	-1.81	-1.45	non-coding (NR_002834, exon 2 of 2)	non-coding (NR_002834, exon 2 of 2)	-4382	NR_023375	100169764		NR_023375	rRNA
1	44636285	44636436	ENSG00000187147		SNORD145	small nucleolar RNA, C/D box 145	0.0074	+	44636285	44636436	0	1	151,	0	-4.08	-4.9	-1.44	intron (NM_001319957, intron 7 of 13)	intron (NM_001319957, intron 7 of 13)	34695	NR_145816	109623472		NR_145816	snoRNA
1	9653326	9653805	ENSG00000179840	ENSG00000179840	PIK3CD-AS1	PIK3CD antisense RNA 1	0.015	-	9653326	9653805	0	1	479,	0	-3.48	-4.23	-1.42	non-coding (NR_027045, exon 2 of 2)	non-coding (NR_027045, exon 2 of 2)	1020	NR_027045	644997	Hs.568595	NM_001045478	ncRNA
1	228652435	228652560	ENSG00000206878	ENSG00000202526	RNA5S13	RNA, 5S ribosomal 13	0.092	+	228652435	228652560	0	1	125,	0	-1.87	-2.39	-1.42	TTS (NR_002834)	TTS (NR_002834)	-6340	NR_023375	100169764		NR_023375	rRNA
1	33007999	33008869	ENSG00000004455	ENSG00000004455	AK2	adenylate kinase 2	2.3e-08	-	33007999	33008869	0	1	870,	0	-16	-17.6	-1.41	non-coding (NR_134976, exon 6 of 6)	non-coding (NR_134976, exon 6 of 6)	28449	NM_001199199	204	Hs.470907	NM_001625	protein-coding
1	26890961	26891081	ENSG00000198746	ENSG00000142751	GPN2	GPN-loop GTPase 2	0.038	-	26890961	26891081	0	1	120,	0	-2.63	-3.26	-1.4	promoter-TSS (NM_018066)	promoter-TSS (NM_018066)	-738	NM_018066	54707	Hs.14333	NM_018066	protein-coding
1	236550343	236550464	ENSG00000116977	ENSG00000223776	LGALS8-AS1	LGALS8 antisense RNA 1	0.00014	+	236550343	236550464	0	1	121,	0	-7.72	-8.89	-1.4	3' UTR (NM_006499, exon 12 of 12)	3' UTR (NM_006499, exon 12 of 12)	-25896	NR_034040	100287902	Hs.677376	NR_034040	ncRNA
1	53244009	53245416	ENSG00000157193	ENSG00000226754	LOC100507564	uncharacterized LOC100507564	4.6e-07	-	53244009	53245416	0	1	1407,	0	-13.1	-14.6	-1.39	3' UTR (NM_017522, exon 16 of 16)	3' UTR (NM_017522, exon 16 of 16)	6103	NR_038953	100507564	Hs.592502	NR_038953	ncRNA
1	166851401	166851761	ENSG00000143157	ENSG00000143157	POGK	pogo transposable element derived with KRAB domain	0.0063	+	166851401	166851761	0	1	360,	0	-4.23	-5.07	-1.39	intron (NM_017542, intron 5 of 5)	intron (NM_017542, intron 5 of 5)	12106	NM_017542	57645	Hs.432752	NM_017542	protein-coding
1	212726271	212726840	ENSG00000117697	ENSG00000123685	BATF3	basic leucine zipper ATF-like transcription factor 3	0.018	-	212726271	212726840	0	1	569,	0	-3.28	-4	-1.39	3' UTR (NM_001297739, exon 5 of 5)	3' UTR (NM_001297739, exon 5 of 5)	-26716	NM_018664	55509	Hs.62919	NM_018664	protein-coding
1	236550322	236550473	ENSG00000119285	ENSG00000223776	LGALS8-AS1	LGALS8 antisense RNA 1	5.8e-05	-	236550322	236550473	0	1	151,	0	-8.53	-9.76	-1.38	3' UTR (NM_006499, exon 12 of 12)	3' UTR (NM_006499, exon 12 of 12)	-25890	NR_034040	100287902	Hs.677376	NR_034040	ncRNA
1	44636309	44645361	ENSG00000126106		SNORD145	small nucleolar RNA, C/D box 145	0.023	-	44636309	44645361	0	2	148,2,	0,9050	-3.08	-3.77	-1.36	intron (NM_001319957, intron 7 of 13)	intron (NM_001319957, intron 7 of 13)	30221	NR_145816	109623472		NR_145816	snoRNA
1	46344939	46345060	ENSG00000117481	ENSG00000117481	NSUN4	NOP2/Sun RNA methyltransferase 4	0.0037	+	46344939	46345060	0	1	121,	0	-4.7	-5.59	-1.35	non-coding (NR_045789, exon 3 of 7)	non-coding (NR_045789, exon 3 of 7)	3822	NM_001256128	387338	Hs.163424	NM_199044	protein-coding
1	52055842	52056141	ENSG00000117862	ENSG00000117862	TXNDC12	thioredoxin domain containing 12	0.034	-	52055842	52056141	0	1	299,	0	-2.74	-3.39	-1.35	promoter-TSS (NM_001136497)	promoter-TSS (NM_001136497)	179	NM_015913	51060	Hs.476033	NM_015913	protein-coding
1	16198182	16198483	ENSG00000142632	ENSG00000142632	ARHGEF19	Rho guanine nucleotide exchange factor 19	0.089	-	16198182	16198483	0	1	301,	0	-1.9	-2.42	-1.33	3' UTR (NM_153213, exon 16 of 16)	3' UTR (NM_153213, exon 16 of 16)	14319	NM_153213	128272	Hs.591532	NM_153213	protein-coding
1	32685820	32686181	ENSG00000162521	ENSG00000162520	SYNC	syncoilin, intermediate filament protein	9.2e-07	+	32685820	32686181	0	1	361,	0	-12.4	-13.9	-1.33	3' UTR (NM_001135255, exon 12 of 12)	3' UTR (NM_001135255, exon 12 of 12)	16769	NM_030786	81493	Hs.712631	NM_030786	protein-coding
1	38839332	38839601	ENSG00000273637	ENSG00000116954	RRAGC	Ras related GTP binding C	0.00047	-	38839332	38839601	0	1	269,	0	-6.59	-7.67	-1.33	3' UTR (NM_001271851, exon 7 of 7)	3' UTR (NM_001271851, exon 7 of 7)	20305	NM_022157	64121	Hs.532461	NM_022157	protein-coding
1	52030529	52033350	ENSG00000285839	ENSG00000198841	KTI12	KTI12 chromatin associated homolog	4.1e-07	-	52030529	52033350	0	2	19,663,	0,2158	-13.2	-14.7	-1.33	TTS (NR_046405)	TTS (NR_046405)	1870	NM_138417	112970	Hs.476033	NM_138417	protein-coding
1	6634496	6634856	ENSG00000007923	ENSG00000041988	THAP3	THAP domain containing 3	0.0006	-	6634496	6634856	0	1	360,	0	-6.37	-7.42	-1.32	3' UTR (NM_138350, exon 5 of 5)	3' UTR (NM_138350, exon 5 of 5)	9526	NM_001195752	90326	Hs.689006	NM_138350	protein-coding
1	16618312	16618373	ENSG00000215908	ENSG00000219481	NBPF1	NBPF member 1	0.15	-	16618312	16618373	0	1	61,	0	-1.49	-1.93	-1.3	TTS (NR_026752)	TTS (NR_026752)	-4738	NM_017940	55672	Hs.467587	NM_017940	protein-coding
1	52055068	52055665	ENSG00000117862	ENSG00000117862	TXNDC12	thioredoxin domain containing 12	1.3e-10	-	52055068	52055665	0	1	597,	0	-20.9	-22.8	-1.3	promoter-TSS (NM_001136497)	promoter-TSS (NM_001136497)	804	NM_015913	51060	Hs.476033	NM_015913	protein-coding
1	47432938	47433118	ENSG00000237424	ENSG00000237424	FOXD2-AS1	FOXD2 adjacent opposite strand RNA 1	0.18	-	47432938	47433118	0	1	180,	0	-1.33	-1.73	-1.29	non-coding (NR_026878, exon 1 of 1)	non-coding (NR_026878, exon 1 of 1)	1613	NR_026878	84793	Hs.127762	NM_032707	ncRNA
1	121094793	121095363	ENSG00000198019		LOC100996318	uncharacterized LOC100996318	0.00027	+	121094793	121095363	0	1	570,	0	-7.09	-8.2	-1.29	3' UTR (NM_001244910, exon 5 of 5)	3' UTR (NM_001244910, exon 5 of 5)	3187	NR_158169	100996318		NR_158169	ncRNA
1	161229099	161229429	ENSG00000158882	ENSG00000284035	MIR5187	microRNA 5187	0.026	+	161229099	161229429	0	1	330,	0	-2.96	-3.64	-1.29	TTS (NM_001077482)	TTS (NM_001077482)	2078	NR_049819	100847090		NR_049819	ncRNA
1	228395717	228396047	ENSG00000154370	ENSG00000284311	MIR6742	microRNA 6742	0.12	-	228395717	228396047	0	1	330,	0	-1.65	-2.12	-1.28	intron (NM_145214, intron 5 of 5)	intron (NM_145214, intron 5 of 5)	1227	NR_106800	102465444		NR_106800	ncRNA
1	44805749	44805990	ENSG00000173846	ENSG00000188396	TCTEX1D4	Tctex1 domain containing 4	4.6e-07	+	44805749	44805990	0	1	241,	0	-13.1	-14.6	-1.26	TTS (NM_001013632)	TTS (NM_001013632)	1415	NM_001013632	343521	Hs.585137	NM_001013632	protein-coding
1	209779396	209779576	ENSG00000009790	ENSG00000162757	C1orf74	chromosome 1 open reading frame 74	0.00016	+	209779396	209779576	0	1	180,	0	-7.56	-8.71	-1.26	non-coding (NR_109871, exon 13 of 13)	non-coding (NR_109871, exon 13 of 13)	5073	NM_152485	148304	Hs.497642	NM_152485	protein-coding
1	6634507	6634868	ENSG00000041988	ENSG00000041988	THAP3	THAP domain containing 3	0.001	+	6634507	6634868	0	1	361,	0	-5.9	-6.91	-1.25	3' UTR (NM_138350, exon 5 of 5)	3' UTR (NM_138350, exon 5 of 5)	9538	NM_001195752	90326	Hs.689006	NM_138350	protein-coding
1	39758199	39759248	ENSG00000116985	ENSG00000198754	OXCT2	3-oxoacid CoA-transferase 2	0.00011	-	39758199	39759248	0	1	1049,	0	-7.97	-9.16	-1.25	3' UTR (NM_001720, exon 7 of 7)	3' UTR (NM_001720, exon 7 of 7)	12624	NM_022120	64064	Hs.472491	NM_022120	protein-coding
1	212854308	212857108	ENSG00000198468	ENSG00000198468	FLVCR1-DT	FLVCR1 divergent transcript	0.006	-	212854308	212857108	0	2	1,505,	0,2295	-4.27	-5.11	-1.25	TTS (NR_027285)	TTS (NR_027285)	2430	NR_027286	642946	Hs.552649	NR_027285	ncRNA
1	1564168	1564289	ENSG00000160075	ENSG00000160075	SSU72	SSU72 homolog, RNA polymerase II CTD phosphatase	0.063	-	1564168	1564289	0	1	121,	0	-2.19	-2.76	-1.24	intron (NM_014188, intron 2 of 4)	intron (NM_014188, intron 2 of 4)	10634	NM_014188	29101	Hs.30026	NM_014188	protein-coding
1	92395702	92395883	ENSG00000122484	ENSG00000162676	GFI1	growth factor independent 1 transcriptional repressor	0.16	+	92395702	92395883	0	1	181,	0	-1.4	-1.82	-1.23	3' UTR (NM_024813, exon 13 of 13)	3' UTR (NM_024813, exon 13 of 13)	88161	NM_001127215	2672	Hs.73172	NM_005263	protein-coding
1	95246779	95246958	ENSG00000271092	ENSG00000122481	RWDD3	RWD domain containing 3	0.0014	+	95246779	95246958	0	1	179,	0	-5.61	-6.59	-1.23	exon (NM_001278248, exon 5 of 5)	exon (NM_001278248, exon 5 of 5)	12659	NM_015485	25950	Hs.483512	NM_015485	protein-coding
1	54173274	54173724	ENSG00000215883	ENSG00000157211	CDCP2	CUB domain containing protein 2	0.059	-	54173274	54173724	0	1	450,	0	-2.25	-2.83	-1.22	3' UTR (NM_001031672, exon 8 of 8)	3' UTR (NM_001031672, exon 8 of 8)	-20318	NM_201546	200008		NM_201546	protein-coding
1	100872908	100873058	ENSG00000162694	ENSG00000162694	EXTL2	exostosin like glycosyltransferase 2	0.0013	-	100872908	100873058	0	1	150,	0	-5.63	-6.61	-1.22	non-coding (NR_048570, exon 6 of 6)	non-coding (NR_048570, exon 6 of 6)	21859	NM_001033025	2135	Hs.357637	NM_001439	protein-coding
1	209779416	209779566	ENSG00000162757	ENSG00000162757	C1orf74	chromosome 1 open reading frame 74	0.00069	-	209779416	209779566	0	1	150,	0	-6.24	-7.28	-1.22	non-coding (NR_109871, exon 13 of 13)	non-coding (NR_109871, exon 13 of 13)	5068	NM_152485	148304	Hs.497642	NM_152485	protein-coding
1	42851488	42852238	ENSG00000164011	ENSG00000164011	ZNF691	zinc finger protein 691	0.00018	+	42851488	42852238	0	1	750,	0	-7.45	-8.6	-1.19	3' UTR (NM_015911, exon 2 of 2)	3' UTR (NM_015911, exon 2 of 2)	5250	NM_001242739	51058	Hs.20879	NM_015911	protein-coding
1	84925702	84926181	ENSG00000153898	ENSG00000171517	LPAR3	lysophosphatidic acid receptor 3	0.0014	-	84925702	84926181	0	1	479,	0	-5.6	-6.57	-1.19	3' UTR (NM_001330647, exon 15 of 15)	3' UTR (NM_001330647, exon 15 of 15)	-32736	NM_012152	23566	Hs.527909	NM_012152	protein-coding
1	112956534	112956805	ENSG00000226419	ENSG00000226419	SLC16A1-AS1	SLC16A1 antisense RNA 1	0.13	+	112956534	112956805	0	1	271,	0	-1.58	-2.04	-1.19	promoter-TSS (NM_001166496).2	promoter-TSS (NM_001166496).2	255	NR_103743	100506392	Hs.418285	NR_103743	ncRNA
1	175147375	175147886	ENSG00000120332	ENSG00000235750	KIAA0040	KIAA0040	0.0044	+	175147375	175147886	0	1	511,	0	-4.55	-5.42	-1.19	3' UTR (NM_022093, exon 19 of 19)	3' UTR (NM_022093, exon 19 of 19)	45145	NM_001162895	9674	Hs.518138	NM_014656	protein-coding
1	236891264	236894485	ENSG00000116984	ENSG00000116984	MTR	5-methyltetrahydrofolate-homocysteine methyltransferase	0.014	+	236891264	236894485	0	2	65,145,	0,3076	-3.49	-4.24	-1.19	intron (NM_000254, intron 29 of 32)	intron (NM_000254, intron 29 of 32)	97583	NM_001291940	4548	Hs.498187	NM_000254	protein-coding
1	247418070	247418430	ENSG00000162711	ENSG00000162711	NLRP3	NLR family pyrin domain containing 3	2.8e-05	+	247418070	247418430	0	1	360,	0	-9.2	-10.5	-1.19	5' UTR (NM_183395, exon 1 of 7)	5' UTR (NM_183395, exon 1 of 7)	201	NM_001243133	114548	Hs.159483	NM_004895	protein-coding
1	26889046	26889847	ENSG00000142751	ENSG00000142751	GPN2	GPN-loop GTPase 2	6.8e-06	-	26889046	26889847	0	2	79,162,	0,639	-10.5	-11.9	-1.18	intron (NM_018066, intron 1 of 4)	MIRb|SINE|MIR	836	NM_018066	54707	Hs.14333	NM_018066	protein-coding
1	35715703	35716304	ENSG00000142686	ENSG00000142686	C1orf216	chromosome 1 open reading frame 216	0.00079	-	35715703	35716304	0	1	601,	0	-6.11	-7.14	-1.18	exon (NM_001348691, exon 2 of 2)	exon (NM_001348691, exon 2 of 2)	907	NM_001348691	127703	Hs.112023	NM_152374	protein-coding
1	47433446	47434193	ENSG00000237424	ENSG00000237424	FOXD2-AS1	FOXD2 adjacent opposite strand RNA 1	0.0019	-	47433446	47434193	0	1	747,	0	-5.29	-6.24	-1.18	non-coding (NR_026878, exon 1 of 1)	non-coding (NR_026878, exon 1 of 1)	821	NR_026878	84793	Hs.127762	NM_032707	ncRNA
1	229635104	229637523	ENSG00000135763	ENSG00000135763	URB2	URB2 ribosome biogenesis homolog	1e-09	+	229635104	229637523	0	1	2419,	0	-18.9	-20.7	-1.18	exon (NM_001314021, exon 4 of 10)	exon (NM_001314021, exon 4 of 10)	10067	NM_014777	9816	Hs.533628	NM_014777	protein-coding
1	15518191	15518312	ENSG00000132906	ENSG00000132906	CASP9	caspase 9	0.062	-	15518191	15518312	0	1	121,	0	-2.21	-2.78	-1.17	exon (NM_032996, exon 2 of 9)	exon (NM_032996, exon 2 of 9)	5963	NM_001229	842	Hs.329502	NM_001229	protein-coding
1	46574813	46574964	ENSG00000079277	ENSG00000162456	KNCN	kinocilin	0.0089	-	46574813	46574964	0	1	151,	0	-3.92	-4.72	-1.17	intron (NR_024176, intron 6 of 12)	intron (NR_024176, intron 6 of 12)	-23232	NM_001322255	148930	Hs.350764	NM_182516	protein-coding
1	173992797	174022147	ENSG00000135870	ENSG00000135870	RC3H1	ring finger and CCCH-type domains 1	4.6e-07	-	173992797	174022147	0	2	338,52,	0,29298	-13	-14.6	-1.16	Intergenic	AluJr|SINE|Alu	-14400	NM_001300850	149041	Hs.30258	NM_172071	protein-coding
1	150286433	150286764	ENSG00000159208	ENSG00000159208	CIART	circadian associated repressor of transcription	0.089	+	150286433	150286764	0	1	331,	0	-1.9	-2.42	-1.15	exon (NM_144697, exon 5 of 5)	exon (NM_144697, exon 5 of 5)	4045	NM_001300840	148523	Hs.54680	NM_144697	protein-coding
1	43671626	43671807	ENSG00000066135	ENSG00000066135	KDM4A	lysine demethylase 4A	1.2e-06	+	43671626	43671807	0	1	181,	0	-12.1	-13.6	-1.14	exon (NM_014663, exon 11 of 22)	exon (NM_014663, exon 11 of 22)	21568	NM_014663	9682	Hs.155983	NM_014663	protein-coding
1	107058471	107058682	ENSG00000198890	ENSG00000198890	PRMT6	protein arginine methyltransferase 6	0.095	+	107058471	107058682	0	1	211,	0	-1.84	-2.35	-1.14	3' UTR (NM_018137, exon 1 of 1)	3' UTR (NM_018137, exon 1 of 1)	1903	NM_018137	55170	Hs.26006	NM_018137	protein-coding
1	11750198	11750437	ENSG00000177674		C1orf167	chromosome 1 open reading frame 167	4.8e-05	+	11750198	11750437	0	1	239,	0	-8.69	-9.94	-1.13	3' UTR (NM_001040196, exon 6 of 6)	3' UTR (NM_001040196, exon 6 of 6)	-11875	NM_001010881	284498	Hs.585415	NM_001010881	protein-coding
1	39757750	39758050	ENSG00000116985	ENSG00000198754	OXCT2	3-oxoacid CoA-transferase 2	0.013	-	39757750	39758050	0	1	300,	0	-3.55	-4.31	-1.13	3' UTR (NM_001720, exon 7 of 7)	3' UTR (NM_001720, exon 7 of 7)	13448	NM_022120	64064	Hs.472491	NM_022120	protein-coding
1	153636837	153636898	ENSG00000160679	ENSG00000189171	S100A13	S100 calcium binding protein A13	0.13	+	153636837	153636898	0	1	61,	0	-1.6	-2.06	-1.13	intron (NM_015607, intron 2 of 5)	intron (NM_015607, intron 2 of 5)	-2507	NM_001024210	6284	Hs.516505	NM_005979	protein-coding
1	229637611	229643584	ENSG00000135763	ENSG00000135763	URB2	URB2 ribosome biogenesis homolog	0.00085	+	229637611	229643584	0	2	636,52,	0,5921	-6.05	-7.07	-1.13	intron (NM_014777, intron 4 of 9)	intron (NM_014777, intron 4 of 9)	14351	NM_014777	9816	Hs.533628	NM_014777	protein-coding
1	32172169	32172410	ENSG00000025800	ENSG00000084652	TXLNA	taxilin alpha	0.0003	+	32172169	32172410	0	1	241,	0	-7.02	-8.12	-1.11	3' UTR (NM_012316, exon 14 of 14)	3' UTR (NM_012316, exon 14 of 14)	-7385	NM_175852	200081	Hs.17987	NM_175852	protein-coding
1	37799719	37800704	ENSG00000233728	ENSG00000185090	MANEAL	mannosidase endo-alpha like	0.024	-	37799719	37800704	0	2	450,75,	0,910	-3.05	-3.74	-1.11	3' UTR (NM_001031740, exon 4 of 4)	3' UTR (NM_001031740, exon 4 of 4)	4724	NM_152496	149175	Hs.534562	NM_152496	protein-coding
1	40256693	40257967	ENSG00000259943	ENSG00000084073	ZMPSTE24	zinc metallopeptidase STE24	1.1e-05	-	40256693	40257967	0	1	1274,	0	-10.1	-11.4	-1.11	promoter-TSS (NM_005857)	promoter-TSS (NM_005857)	-906	NM_005857	10269	Hs.132642	NM_005857	protein-coding
1	43914014	43914584	ENSG00000126091	ENSG00000117407	ARTN	artemin	7.9e-05	+	43914014	43914584	0	1	570,	0	-8.23	-9.44	-1.11	intron (NM_001270461, intron 8 of 8)	MIR3|SINE|MIR	-19021	NM_057090	9048	Hs.632404	NM_003976	protein-coding
1	145960696	145961235	ENSG00000272031	ENSG00000271601	LIX1L	limb and CNS expressed 1 like	0.16	-	145960696	145961235	0	1	539,	0	-1.4	-1.82	-1.11	exon (NM_001039888, exon 4 of 4)	exon (NM_001039888, exon 4 of 4)	-2949	NM_153713	128077	Hs.740619	NM_153713	protein-coding
1	155563177	155563708	ENSG00000235919	ENSG00000116539	ASH1L	ASH1 like histone lysine methyltransferase	0.019	+	155563177	155563708	0	1	531,	0	-3.25	-3.97	-1.11	promoter-TSS (NM_001366177)	promoter-TSS (NM_001366177)	-640	NM_018489	55870	Hs.491060	NM_018489	protein-coding
1	161229873	161230858	ENSG00000143257	ENSG00000284035	MIR5187	microRNA 5187	0.0051	-	161229873	161230858	0	2	53,514,	0,471	-4.42	-5.28	-1.1	3' UTR (NM_001286373, exon 9 of 9)	3' UTR (NM_001286373, exon 9 of 9)	3180	NR_049819	100847090		NR_049819	ncRNA
1	180269832	180270132	ENSG00000230124	ENSG00000230124	LHX4-AS1	LHX4 antisense RNA 1	0.072	-	180269832	180270132	0	1	300,	0	-2.08	-2.63	-1.1	non-coding (NR_037642, exon 5 of 5)	non-coding (NR_037642, exon 5 of 5)	4699	NR_037642	100527964	Hs.496545	NR_037642	ncRNA
1	37796777	37800241	ENSG00000185090	ENSG00000185090	MANEAL	mannosidase endo-alpha like	0.0054	+	37796777	37800241	0	2	43,675,	0,2789	-4.38	-5.23	-1.09	intron (NM_001031740, intron 3 of 3)	AluJr|SINE|Alu	3021	NM_152496	149175	Hs.534562	NM_152496	protein-coding
1	45508804	45509373	ENSG00000132763	ENSG00000132763	MMACHC	metabolism of cobalamin associated C	0.0096	+	45508804	45509373	0	1	569,	0	-3.85	-4.65	-1.09	exon (NM_015506, exon 4 of 4)	exon (NM_015506, exon 4 of 4)	8789	NM_015506	25974	Hs.13024	NM_015506	protein-coding
1	161121003	161121122	ENSG00000158796	ENSG00000158793	NIT1	nitrilase 1	0.17	-	161121003	161121122	0	1	119,	0	-1.35	-1.76	-1.09	TTS (NM_001330765)	TTS (NM_001330765)	2945	NM_001185094	4817	Hs.146406	NM_005600	protein-coding
1	6602224	6602494	ENSG00000162413	ENSG00000162413	KLHL21	kelch like family member 21	0.079	-	6602224	6602494	0	1	270,	0	-2.01	-2.54	-1.08	exon (NM_014851, exon 1 of 4)	exon (NM_014851, exon 1 of 4)	510	NM_001324309	9903	Hs.7764	NM_014851	protein-coding
1	41579931	41580171	ENSG00000127124	ENSG00000127129	EDN2	endothelin 2	0.17	-	41579931	41580171	0	1	240,	0	-1.35	-1.76	-1.08	exon (NM_001127714, exon 3 of 8)	exon (NM_001127714, exon 3 of 8)	-95368	NR_126098	1907	Hs.1407	NM_001956	protein-coding
1	40450670	40450970	ENSG00000187801	ENSG00000187801	ZFP69B	ZFP69 zinc finger protein B	0.083	+	40450670	40450970	0	1	300,	0	-1.96	-2.49	-1.07	5' UTR (NM_023070, exon 1 of 5)	5' UTR (NM_023070, exon 1 of 5)	344	NM_023070	65243	Hs.133034	NM_023070	protein-coding
1	41027229	41027379	ENSG00000010803	ENSG00000171790	SLFNL1	schlafen like 1	0.032	-	41027229	41027379	0	1	150,	0	-2.78	-3.43	-1.07	non-coding (NR_135092, exon 16 of 16)	non-coding (NR_135092, exon 16 of 16)	-5549	NM_001168247	200172	Hs.194609	NM_144990	protein-coding
1	220266386	220267466	ENSG00000118873		AURKAP1	aurora kinase A pseudogene 1	0.017	-	220266386	220267466	0	1	1080,	0	-3.33	-4.05	-1.07	non-coding (NR_001587, exon 1 of 1)	non-coding (NR_001587, exon 1 of 1)	789	NR_001587	6791	Hs.654849	NR_001587	pseudo
1	1082117	1082926	ENSG00000131591	ENSG00000237330	RNF223	ring finger protein 223	7.5e-06	-	1082117	1082926	0	1	809,	0	-10.4	-11.8	-1.06	3' UTR (NM_001330306, exon 12 of 12)	3' UTR (NM_001330306, exon 12 of 12)	-8216	NM_001205252	401934	Hs.568137	NM_001205252	protein-coding
1	12142442	12144207	ENSG00000120949	ENSG00000283789	MIR7846	microRNA 7846	0.035	+	12142442	12144207	0	1	1765,	0	-2.69	-3.34	-1.06	3' UTR (NM_001281430, exon 14 of 14)	3' UTR (NM_001281430, exon 14 of 14)	-23618	NR_107000	102465836		NR_107000	ncRNA
1	52608398	52609021	ENSG00000116157	ENSG00000116157	GPX7	glutathione peroxidase 7	0.00059	+	52608398	52609021	0	1	623,	0	-6.39	-7.44	-1.06	3' UTR (NM_015696, exon 3 of 3)	3' UTR (NM_015696, exon 3 of 3)	6339	NM_015696	2882	Hs.43728	NM_015696	protein-coding
1	1752069	1752250	ENSG00000008130	ENSG00000215790	SLC35E2A	solute carrier family 35 member E2A	0.0029	-	1752069	1752250	0	1	181,	0	-4.94	-5.85	-1.04	3' UTR (NM_001198995, exon 10 of 10)	3' UTR (NM_001198995, exon 10 of 10)	-6161	NM_182838	9906	Hs.655255	NM_182838	protein-coding
1	41011994	41012175	ENSG00000171793	ENSG00000281207	SLFNL1-AS1	SLFNL1 antisense RNA 1	0.0024	+	41011994	41012175	0	1	181,	0	-5.11	-6.03	-1.04	non-coding (NR_125440, exon 18 of 18)	non-coding (NR_125440, exon 18 of 18)	-2505	NR_037868	100507178	Hs.660056	NR_037868	ncRNA
1	113895857	113895948	ENSG00000134262	ENSG00000188761	BCL2L15	BCL2 like 15	0.12	-	113895857	113895948	0	1	91,	0	-1.66	-2.13	-1.04	exon (NM_001308312, exon 6 of 7)	exon (NM_001308312, exon 6 of 7)	-8322	NM_001010922	440603	Hs.123106	NM_001010922	protein-coding
1	148290888	148292918	ENSG00000274020	ENSG00000283676	MIR5087	microRNA 5087	0.0033	-	148290888	148292918	0	2	416,5,	0,2025	-4.82	-5.72	-1.04	Intergenic	L2a|LINE|L2	42651	NR_049810	100847044		NR_049810	ncRNA
1	2591140	2591439	ENSG00000157870	ENSG00000157870	PRXL2B	peroxiredoxin like 2B	0.033	+	2591140	2591439	0	1	299,	0	-2.75	-3.4	-1.03	non-coding (NR_036637, exon 7 of 7)	non-coding (NR_036637, exon 7 of 7)	4513	NM_152371	127281	Hs.462033	NM_152371	protein-coding
1	40238171	40239337	ENSG00000117000	ENSG00000188800	TMCO2	transmembrane and coiled-coil domains 2	1.2e-20	+	40238171	40239337	0	1	1166,	0	-43.5	-45.9	-1.03	exon (NM_012421, exon 8 of 8)	exon (NM_012421, exon 8 of 8)	-9183	NM_001008740	127391	Hs.406265	NM_001008740	protein-coding
1	112968086	112968746	ENSG00000226419	ENSG00000226419	SLC16A1-AS1	SLC16A1 antisense RNA 1	0.05	+	112968086	112968746	0	1	660,	0	-2.39	-3	-1.03	Intergenic	Intergenic	12001	NR_103743	100506392	Hs.418285	NR_103743	ncRNA
1	15941868	15942108	ENSG00000116809	ENSG00000116809	ZBTB17	zinc finger and BTB domain containing 17	0.047	-	15941868	15942108	0	1	240,	0	-2.45	-3.06	-1.01	exon (NM_001324138, exon 15 of 15)	exon (NM_001324138, exon 15 of 15)	34144	NM_001287604	7709	Hs.433764	NM_003443	protein-coding
1	150293868	150294158	ENSG00000266472	ENSG00000266472	MRPS21	mitochondrial ribosomal protein S21	3.7e-05	+	150293868	150294158	0	2	30,239,	0,51	-8.9	-10.2	-1.01	5' UTR (NM_018997, exon 1 of 2)	5' UTR (NM_018997, exon 1 of 2)	171	NM_018997	54460	Hs.405880	NM_018997	protein-coding
1	154549594	154549744	ENSG00000160714	ENSG00000229780	UBE2Q1-AS1	UBE2Q1 antisense RNA 1	0.16	-	154549594	154549744	0	1	150,	0	-1.41	-1.83	-1	3' UTR (NM_017582, exon 13 of 13)	3' UTR (NM_017582, exon 13 of 13)	-3940	NR_046668	100874097		NR_046668	ncRNA
1	154983337	154983548	ENSG00000160688	ENSG00000160688	FLAD1	flavin adenine dinucleotide synthetase 1	0.082	+	154983337	154983548	0	1	211,	0	-1.97	-2.5	-1	promoter-TSS (NM_001184892)	promoter-TSS (NM_001184892)	99	NM_025207	80308	Hs.118666	NM_025207	protein-coding
1	148288000	148288951	ENSG00000228626		LOC101927468	uncharacterized LOC101927468	0.091	-	148288000	148288951	0	2	57,228,	0,723	-1.88	-2.4	-0.996	Intergenic	Intergenic	-41405	NR_120331	101927468	Hs.515867	NR_120331	ncRNA
1	40541623	40544519	ENSG00000117010	ENSG00000117010	ZNF684	zinc finger protein 684	0.13	+	40541623	40544519	0	2	87,123,	0,2773	-1.61	-2.07	-0.994	intron (NM_152373, intron 4 of 4)	AluJo|SINE|Alu	11434	NM_152373	127396	Hs.524767	NM_152373	protein-coding
1	6632437	6632647	ENSG00000041988	ENSG00000041988	THAP3	THAP domain containing 3	0.12	+	6632437	6632647	0	1	210,	0	-1.67	-2.14	-0.985	intron (NM_138350, intron 4 of 4)	intron (NM_138350, intron 4 of 4)	7392	NM_001195752	90326	Hs.689006	NM_138350	protein-coding
1	1313225	1313586	ENSG00000127054	ENSG00000283712	MIR6727	microRNA 6727	0.022	-	1313225	1313586	0	1	361,	0	-3.12	-3.82	-0.983	promoter-TSS (NR_106785)	promoter-TSS (NR_106785)	-840	NR_106785	102465435		NR_106785	ncRNA
1	149646875	149647175	ENSG00000277147	ENSG00000277147	LINC00869	long intergenic non-protein coding RNA 869	0.037	+	149646875	149647175	0	1	300,	0	-2.65	-3.29	-0.979	non-coding (NR_111952, exon 2 of 2)	non-coding (NR_111952, exon 2 of 2)	40013	NR_111950	57234	Hs.456578	NR_046135	ncRNA
1	40477780	40479309	ENSG00000187815	ENSG00000187815	ZFP69	ZFP69 zinc finger protein	0.01	+	40477780	40479309	0	2	114,274,	0,1255	-3.77	-4.56	-0.972	intron (NM_001320178, intron 1 of 5)	Kanga11a|DNA|TcMar-Tc2	1255	NM_001320179	339559	Hs.434385	NM_198494	protein-coding
1	146058677	146059457	ENSG00000233396	ENSG00000233396	LINC01719	long intergenic non-protein coding RNA 1719	0.14	+	146058677	146059457	0	1	780,	0	-1.54	-1.99	-0.964	TTS (NR_125967)	TTS (NR_125967)	6471	NR_125967	101928979	Hs.735893	NR_125967	ncRNA
1	27306534	27306715	ENSG00000142784	ENSG00000186501	TMEM222	transmembrane protein 222	0.00059	+	27306534	27306715	0	1	181,	0	-6.39	-7.44	-0.961	3' UTR (NM_015023, exon 16 of 16)	3' UTR (NM_015023, exon 16 of 16)	-15520	NM_032125	84065	Hs.469171	NM_032125	protein-coding
1	39757450	39757571	ENSG00000116985	ENSG00000198754	OXCT2	3-oxoacid CoA-transferase 2	0.15	-	39757450	39757571	0	1	121,	0	-1.47	-1.91	-0.96	TTS (NR_036543)	TTS (NR_036543)	13837	NM_022120	64064	Hs.472491	NM_022120	protein-coding
1	9266511	9266722	ENSG00000049239	ENSG00000171621	SPSB1	splA/ryanodine receptor domain and SOCS box containing 1	0.0016	+	9266511	9266722	0	1	211,	0	-5.49	-6.45	-0.958	3' UTR (NM_004285, exon 5 of 5)	3' UTR (NM_004285, exon 5 of 5)	-26277	NM_025106	80176	Hs.8261	NM_025106	protein-coding
1	6524394	6524814	ENSG00000162408	ENSG00000171680	PLEKHG5	pleckstrin homology and RhoGEF domain containing G5	0.00072	-	6524394	6524814	0	1	420,	0	-6.21	-7.24	-0.952	3' UTR (NM_024654, exon 12 of 12)	3' UTR (NM_024654, exon 12 of 12)	-4543	NM_198681	57449	Hs.284232	NM_020631	protein-coding
1	219211576	219211817	ENSG00000143353	ENSG00000143353	LYPLAL1	lysophospholipase like 1	0.001	+	219211576	219211817	0	1	241,	0	-5.88	-6.89	-0.948	exon (NM_138794, exon 5 of 5)	exon (NM_138794, exon 5 of 5)	36728	NM_001300772	127018	Hs.657617	NM_138794	protein-coding
1	222837146	222837384	ENSG00000228106	ENSG00000154309	DISP1	dispatched RND transporter family member 1	0.16	+	222837146	222837384	0	1	238,	0	-1.4	-1.82	-0.948	intron (NM_032890, intron 1 of 9)	MLT1J|LTR|ERVL-MaLR	22226	NM_001350630	84976	Hs.528817	NM_032890	protein-coding
1	54226864	54227015	ENSG00000157216	ENSG00000198711	SSBP3-AS1	SSBP3 antisense RNA 1	0.0049	-	54226864	54227015	0	1	151,	0	-4.46	-5.32	-0.944	3' UTR (NM_145716, exon 18 of 18)	3' UTR (NM_145716, exon 18 of 18)	-9503	NR_103541	619518	Hs.591438	NM_001034847	ncRNA
1	245091082	245091743	ENSG00000203666	ENSG00000162849	KIF26B	kinesin family member 26B	0.0022	+	245091082	245091743	0	1	661,	0	-5.18	-6.11	-0.939	intron (NM_001143943, intron 6 of 6)	intron (NM_001143943, intron 6 of 6)	-63572	NM_018012	55083	Hs.143134	NM_018012	protein-coding
1	182828915	182829066	ENSG00000135838	ENSG00000135829	DHX9	DExH-box helicase 9	0.13	+	182828915	182829066	0	1	151,	0	-1.57	-2.03	-0.936	3' UTR (NM_030769, exon 13 of 13)	3' UTR (NM_030769, exon 13 of 13)	-10356	NR_033302	1660	Hs.191518	NM_001357	protein-coding
1	26794184	26794365	ENSG00000060642	ENSG00000060642	PIGV	phosphatidylinositol glycan anchor biosynthesis class V	0.13	+	26794184	26794365	0	1	181,	0	-1.59	-2.06	-0.935	exon (NM_017837, exon 3 of 4)	exon (NM_017837, exon 3 of 4)	6087	NM_001202554	55650	Hs.259605	NM_017837	protein-coding
1	155183897	155184285	ENSG00000163462	ENSG00000185499	MUC1	mucin 1, cell surface associated	0.013	+	155183897	155184285	0	1	388,	0	-3.58	-4.34	-0.93	exon (NM_001282378, exon 9 of 9)	exon (NM_001282378, exon 9 of 9)	8818	NM_001204294	4582	Hs.89603	NM_002456	protein-coding
1	248847152	248848440	ENSG00000171161	ENSG00000171161	ZNF672	zinc finger protein 672	7.9e-05	+	248847152	248848440	0	1	1288,	0	-8.24	-9.45	-0.929	exon (NM_024836, exon 4 of 4)	exon (NM_024836, exon 4 of 4)	9572	NM_024836	79894	Hs.521151	NM_024836	protein-coding
1	150472825	150473394	ENSG00000163125	ENSG00000143374	TARS2	threonyl-tRNA synthetase 2, mitochondrial	3.8e-13	+	150472825	150473394	0	1	569,	0	-26.5	-28.6	-0.926	exon (NM_001297674, exon 10 of 10)	exon (NM_001297674, exon 10 of 10)	-14309	NM_001271895	80222	Hs.288974	NM_025150	protein-coding
1	5862900	5863171	ENSG00000131697	ENSG00000264101	MIR4689	microRNA 4689	0.12	-	5862900	5863171	0	1	271,	0	-1.68	-2.16	-0.924	promoter-TSS (NR_039838)	promoter-TSS (NR_039838)	-295	NR_039838	100616421		NR_039838	ncRNA
1	67390087	67396552	ENSG00000081985	ENSG00000142864	SERBP1	SERPINE1 mRNA binding protein 1	5e-05	+	67390087	67396552	0	2	41,1006,	0,5459	-8.67	-9.91	-0.923	intron (NM_001258215, intron 13 of 13)	intron (NM_001258215, intron 13 of 13)	37082	NM_001018068	26135	Hs.530412	NM_015640	protein-coding
1	53202318	53202588	ENSG00000157184	ENSG00000157184	CPT2	carnitine palmitoyltransferase 2	0.043	+	53202318	53202588	0	1	270,	0	-2.52	-3.14	-0.919	intron (NM_000098, intron 3 of 4)	intron (NM_000098, intron 3 of 4)	5629	NM_000098	1376	Hs.713535	NM_000098	protein-coding
1	40239665	40240592	ENSG00000117000	ENSG00000188800	TMCO2	transmembrane and coiled-coil domains 2	1.7e-11	+	40239665	40240592	0	1	927,	0	-22.8	-24.8	-0.918	exon (NM_012421, exon 8 of 8)	exon (NM_012421, exon 8 of 8)	-7808	NM_001008740	127391	Hs.406265	NM_001008740	protein-coding
1	52994806	52995796	ENSG00000116171	ENSG00000116171	SCP2	sterol carrier protein 2	0.11	+	52994806	52995796	0	1	990,	0	-1.74	-2.23	-0.918	intron (NM_001193600, intron 10 of 14)	intron (NM_001193600, intron 10 of 14)	-19636	NM_001007100	6342	Hs.476365	NM_002979	protein-coding
1	234980083	234980658	ENSG00000258082	ENSG00000238005	LOC101927851	uncharacterized LOC101927851	0.1	-	234980083	234980658	0	2	260,3,	0,572	-1.79	-2.29	-0.914	Intergenic	Intergenic	-16372	NR_125945	101927851	Hs.520684	NR_125945	ncRNA
1	16618762	16618912	ENSG00000215908	ENSG00000219481	NBPF1	NBPF member 1	0.07	-	16618762	16618912	0	1	150,	0	-2.11	-2.66	-0.913	non-coding (NR_026752, exon 7 of 7)	non-coding (NR_026752, exon 7 of 7)	-5232	NM_017940	55672	Hs.467587	NM_017940	protein-coding
1	32179685	32180183	ENSG00000084652	ENSG00000084652	TXLNA	taxilin alpha	0.058	+	32179685	32180183	0	2	91,119,	0,379	-2.26	-2.84	-0.912	intron (NM_175852, intron 1 of 10)	CpG	259	NM_175852	200081	Hs.17987	NM_175852	protein-coding
1	52994814	52995790	ENSG00000226147	ENSG00000116171	SCP2	sterol carrier protein 2	0.12	+	52994814	52995790	0	1	976,	0	-1.67	-2.14	-0.908	intron (NM_001193600, intron 10 of 14)	intron (NM_001193600, intron 10 of 14)	-19635	NM_001007100	6342	Hs.476365	NM_002979	protein-coding
1	155062475	155062745	ENSG00000143537	ENSG00000243364	EFNA4	ephrin A4	0.058	+	155062475	155062745	0	1	270,	0	-2.27	-2.85	-0.907	non-coding (NR_048578, exon 23 of 23)	non-coding (NR_048578, exon 23 of 23)	-1130	NM_182690	1945	Hs.449913	NM_005227	protein-coding
1	96806938	96812842	ENSG00000117569	ENSG00000117569	PTBP2	polypyrimidine tract binding protein 2	0.044	+	96806938	96812842	0	2	20,131,	0,5773	-2.51	-3.13	-0.904	intron (NM_001300985, intron 11 of 13)	L1M5|LINE|L1	87252	NR_125356	58155	Hs.596061	NM_021190	protein-coding
1	151198560	151198770	ENSG00000143398	ENSG00000143398	PIP5K1A	phosphatidylinositol-4-phosphate 5-kinase type 1 alpha	0.017	+	151198560	151198770	0	1	210,	0	-3.33	-4.05	-0.9	5' UTR (NM_003557, exon 1 of 15)	5' UTR (NM_003557, exon 1 of 15)	113	NM_003557	8394	Hs.655131	NM_003557	protein-coding
1	33495217	33495757	ENSG00000121903	ENSG00000121903	ZSCAN20	zinc finger and SCAN domain containing 20	0.045	+	33495217	33495757	0	1	540,	0	-2.49	-3.11	-0.897	3' UTR (NM_145238, exon 8 of 8)	3' UTR (NM_145238, exon 8 of 8)	22842	NM_145238	7579	Hs.442705	NM_145238	protein-coding
1	46188681	46188981	ENSG00000085998	ENSG00000085998	POMGNT1	protein O-linked mannose N-acetylglucosaminyltransferase 1 (beta 1,2-)	0.12	-	46188681	46188981	0	1	300,	0	-1.63	-2.1	-0.894	exon (NM_001243766, exon 23 of 23)	exon (NM_001243766, exon 23 of 23)	8668	NM_001290129	55624	Hs.525134	NM_017739	protein-coding
1	100148626	100149043	ENSG00000122477	ENSG00000122435	TRMT13	tRNA methyltransferase 13 homolog	0.0011	-	100148626	100149043	0	1	417,	0	-5.81	-6.81	-0.893	non-coding (NR_135078, exon 11 of 11)	non-coding (NR_135078, exon 11 of 11)	15685	NM_019083	54482	Hs.729095	NM_019083	protein-coding
1	39808172	39809302	ENSG00000284719	ENSG00000261798	LOC101929536	uncharacterized LOC101929536	0.076	+	39808172	39809302	0	2	26,241,	0,889	-2.03	-2.58	-0.891	Intergenic	SVA_B|Retroposon|SVA	19761	NR_135805	101929536	Hs.552820	NR_135805	ncRNA
1	100147922	100148283	ENSG00000122435	ENSG00000122435	TRMT13	tRNA methyltransferase 13 homolog	0.0012	+	100147922	100148283	0	1	361,	0	-5.76	-6.75	-0.89	TTS (NM_001256385)	TTS (NM_001256385)	14953	NM_019083	54482	Hs.729095	NM_019083	protein-coding
1	1598964	1599560	ENSG00000228594		LOC105378586	uncharacterized LOC105378586	0.034	-	1598964	1599560	0	1	596,	0	-2.74	-3.39	-0.889	promoter-TSS (NR_147951)	promoter-TSS (NR_147951)	-171	NR_147951	105378586	Hs.633349	NR_147951	ncRNA
1	161229936	161230744	ENSG00000158882	ENSG00000284035	MIR5187	microRNA 5187	0.001	+	161229936	161230744	0	1	808,	0	-5.85	-6.86	-0.881	3' UTR (NM_001286373, exon 9 of 9)	3' UTR (NM_001286373, exon 9 of 9)	3154	NR_049819	100847090		NR_049819	ncRNA
1	153977650	153978010	ENSG00000285641	ENSG00000143543	JTB	jumping translocation breakpoint	0.059	-	153977650	153978010	0	1	360,	0	-2.25	-2.83	-0.876	promoter-TSS (NM_006694)	promoter-TSS (NM_006694)	-156	NM_006694	10899	Hs.6396	NM_006694	protein-coding
1	248848559	248848829	ENSG00000171161	ENSG00000171163	ZNF692	zinc finger protein 692	0.017	+	248848559	248848829	0	1	270,	0	-3.35	-4.08	-0.875	3' UTR (NM_024836, exon 4 of 4)	3' UTR (NM_024836, exon 4 of 4)	10391	NM_017865	55657	Hs.377705	NM_017865	protein-coding
1	26879401	26879612	ENSG00000142751	ENSG00000142751	GPN2	GPN-loop GTPase 2	0.021	-	26879401	26879612	0	1	211,	0	-3.17	-3.88	-0.873	3' UTR (NM_018066, exon 5 of 5)	3' UTR (NM_018066, exon 5 of 5)	10776	NM_018066	54707	Hs.14333	NM_018066	protein-coding
1	100148640	100149060	ENSG00000122435	ENSG00000122435	TRMT13	tRNA methyltransferase 13 homolog	0.00091	+	100148640	100149060	0	1	420,	0	-5.99	-7	-0.868	non-coding (NR_135078, exon 11 of 11)	non-coding (NR_135078, exon 11 of 11)	15700	NM_019083	54482	Hs.729095	NM_019083	protein-coding
1	25783717	25784078	ENSG00000117643	ENSG00000162430	SELENON	selenoprotein N	0.12	+	25783717	25784078	0	1	361,	0	-1.68	-2.16	-0.856	3' UTR (NM_001289010, exon 12 of 12)	3' UTR (NM_001289010, exon 12 of 12)	-16295	NM_020451	57190	Hs.323396	NM_020451	protein-coding
1	150144790	150144940	ENSG00000136631	ENSG00000023902	PLEKHO1	pleckstrin homology domain containing O1	0.057	+	150144790	150144940	0	1	150,	0	-2.28	-2.86	-0.849	exon (NM_001279353, exon 14 of 14)	exon (NM_001279353, exon 14 of 14)	-4569	NM_001304722	51177	Hs.438824	NM_016274	protein-coding
1	31059213	31059514	ENSG00000134644	ENSG00000134644	PUM1	pumilio RNA binding family member 1	2e-06	-	31059213	31059514	0	1	301,	0	-11.7	-13.1	-0.848	exon (NM_014676, exon 2 of 22)	exon (NM_014676, exon 2 of 22)	6353	NM_001020658	9698	Hs.281707	NM_014676	protein-coding
1	39841045	39841316	ENSG00000043514	ENSG00000043514	TRIT1	tRNA isopentenyltransferase 1	0.014	-	39841045	39841316	0	1	271,	0	-3.5	-4.25	-0.848	non-coding (NR_132401, exon 11 of 11)	non-coding (NR_132401, exon 11 of 11)	42323	NM_017646	54802	Hs.356554	NM_017646	protein-coding
1	155326620	155326951	ENSG00000160753	ENSG00000160753	RUSC1	RUN and SH3 domain containing 1	0.0062	+	155326620	155326951	0	1	331,	0	-4.25	-5.08	-0.839	exon (NM_014328, exon 7 of 9)	exon (NM_014328, exon 7 of 9)	2279	NR_103478	23623	Hs.226499	NM_014328	protein-coding
1	119140693	119141856	ENSG00000231365	ENSG00000116874	WARS2	tryptophanyl tRNA synthetase 2, mitochondrial	0.043	+	119140693	119141856	0	2	100,110,	0,1053	-2.52	-3.14	-0.838	promoter-TSS (NM_201263)	promoter-TSS (NM_201263)	-603	NM_201263	10352	Hs.523506	NM_015836	protein-coding
1	151292455	151292756	ENSG00000143393	ENSG00000143373	ZNF687	zinc finger protein 687	2.8e-05	-	151292455	151292756	0	1	301,	0	-9.21	-10.5	-0.834	TTS (NM_001304763)	TTS (NM_001304763)	10307	NM_020832	57592	Hs.186756	NM_020832	protein-coding
1	11919978	11922357	ENSG00000116685	ENSG00000116685	KIAA2013	KIAA2013	1.3e-13	-	11919978	11922357	0	2	354,183,	0,2196	-27.7	-29.7	-0.829	intron (NM_138346, intron 2 of 2)	intron (NM_138346, intron 2 of 2)	5259	NM_138346	90231	Hs.520094	NM_138346	protein-coding
1	53213897	53214197	ENSG00000157184	ENSG00000162384	CZIB	CXXC motif containing zinc binding protein	0.0048	+	53213897	53214197	0	1	300,	0	-4.47	-5.33	-0.825	TTS (NM_001304760)	TTS (NM_001304760)	6587	NM_017887	54987	Hs.525391	NM_017887	protein-coding
1	182599011	182599312	ENSG00000143333	ENSG00000143333	RGS16	regulator of G protein signaling 16	0.00049	-	182599011	182599312	0	1	301,	0	-6.55	-7.62	-0.825	3' UTR (NM_002928, exon 5 of 5)	3' UTR (NM_002928, exon 5 of 5)	5227	NM_002928	6004	Hs.413297	NM_002928	protein-coding
1	116514623	116514802	ENSG00000116815	ENSG00000233154	LINC01762	long intergenic non-protein coding RNA 1762	0.0014	-	116514623	116514802	0	1	179,	0	-5.62	-6.6	-0.823	non-coding (NR_026665, exon 6 of 6)	non-coding (NR_026665, exon 6 of 6)	-35887	NR_125972	101929023	Hs.668091	NR_125972	ncRNA
1	93877576	93878570	ENSG00000067334	ENSG00000067334	DNTTIP2	deoxynucleotidyltransferase terminal interacting protein 2	0.00051	-	93877576	93878570	0	2	307,23,	0,971	-6.51	-7.58	-0.812	intron (NM_014597, intron 1 of 6)	AluSg|SINE|Alu	1133	NM_014597	30836	Hs.85769	NM_014597	protein-coding
1	248849307	248849517	ENSG00000171161	ENSG00000171163	ZNF692	zinc finger protein 692	0.11	+	248849307	248849517	0	1	210,	0	-1.71	-2.2	-0.811	TTS (NM_001350072)	TTS (NM_001350072)	9673	NM_017865	55657	Hs.377705	NM_017865	protein-coding
1	46364553	46364703	ENSG00000117481	ENSG00000117481	NSUN4	NOP2/Sun RNA methyltransferase 4	0.18	+	46364553	46364703	0	1	150,	0	-1.33	-1.74	-0.81	non-coding (NR_045789, exon 7 of 7)	non-coding (NR_045789, exon 7 of 7)	23450	NM_001256128	387338	Hs.163424	NM_199044	protein-coding
1	155017057	155017148	ENSG00000160685	ENSG00000160685	ZBTB7B	zinc finger and BTB domain containing 7B	0.034	+	155017057	155017148	0	1	91,	0	-2.74	-3.39	-0.809	non-coding (NR_045515, exon 6 of 6)	non-coding (NR_045515, exon 6 of 6)	14473	NR_049765	51043	Hs.729279	NM_001252406	protein-coding
1	43912785	43913116	ENSG00000126091	ENSG00000117407	ARTN	artemin	0.018	+	43912785	43913116	0	1	331,	0	-3.27	-3.99	-0.799	intron (NM_001270461, intron 8 of 8)	intron (NM_001270461, intron 8 of 8)	-20369	NM_057090	9048	Hs.632404	NM_003976	protein-coding
1	52896958	52897888	ENSG00000121310	ENSG00000121310	ECHDC2	enoyl-CoA hydratase domain containing 2	0.00068	-	52896958	52897888	0	1	930,	0	-6.25	-7.29	-0.799	intron (NM_001319958, intron 9 of 9)	intron (NM_001319958, intron 9 of 9)	24317	NM_001319958	55268	Hs.476319	NM_018281	protein-coding
1	161120648	161124430	ENSG00000158793	ENSG00000158793	NIT1	nitrilase 1	9.2e-06	+	161120648	161124430	0	3	545,32,290,	0,1658,3492	-10.2	-11.6	-0.797	intron (NM_001039711, intron 4 of 4)	intron (NM_001039711, intron 4 of 4)	4421	NM_001185094	4817	Hs.146406	NM_005600	protein-coding
1	52667481	52669026	ENSG00000182183	ENSG00000162377	COA7	cytochrome c oxidase assembly factor 7 (putative)	0.0074	+	52667481	52669026	0	2	207,540,	0,1005	-4.08	-4.9	-0.796	intron (NR_135156, intron 5 of 5)	intron (NR_135156, intron 5 of 5)	30093	NM_023077	65260	Hs.349905	NM_023077	protein-coding
1	63368161	63371219	ENSG00000088035	ENSG00000088035	ALG6	ALG6 alpha-1,3-glucosyltransferase	0.0046	+	63368161	63371219	0	2	29,449,	0,2609	-4.53	-5.39	-0.794	intron (NM_013339, intron 1 of 14)	intron (NM_013339, intron 1 of 14)	2063	NM_013339	29929	Hs.258501	NM_013339	protein-coding
1	9929999	9930327	ENSG00000162441	ENSG00000173614	NMNAT1	nicotinamide nucleotide adenylyltransferase 1	0.012	-	9929999	9930327	0	1	328,	0	-3.66	-4.44	-0.793	3' UTR (NM_032368, exon 8 of 8)	3' UTR (NM_032368, exon 8 of 8)	-12760	NM_001297778	64802	Hs.633762	NM_022787	protein-coding
1	52685199	52685589	ENSG00000162377	ENSG00000162377	COA7	cytochrome c oxidase assembly factor 7 (putative)	0.014	-	52685199	52685589	0	1	390,	0	-3.53	-4.28	-0.793	3' UTR (NM_023077, exon 3 of 3)	3' UTR (NM_023077, exon 3 of 3)	12953	NM_023077	65260	Hs.349905	NM_023077	protein-coding
1	202731811	202732112	ENSG00000117139	ENSG00000143858	SYT2	synaptotagmin 2	0.014	-	202731811	202732112	0	1	301,	0	-3.5	-4.25	-0.789	intron (NM_001314042, intron 24 of 27)	intron (NM_001314042, intron 24 of 27)	-21508	NM_177402	127833	Hs.25422	NM_177402	protein-coding
1	209844606	209851868	ENSG00000117597	ENSG00000117597	UTP25	UTP25 small subunit processor component	0.00073	+	209844606	209851868	0	2	26,665,	0,6597	-6.18	-7.22	-0.786	intron (NM_014388, intron 11 of 11)	L1MC4|LINE|L1	20265	NM_014388	27042	Hs.194754	NM_014388	protein-coding
1	113894987	113895468	ENSG00000134262	ENSG00000188761	BCL2L15	BCL2 like 15	0.0022	-	113894987	113895468	0	1	481,	0	-5.17	-6.1	-0.784	exon (NM_001308312, exon 7 of 7)	exon (NM_001308312, exon 7 of 7)	-7647	NM_001010922	440603	Hs.123106	NM_001010922	protein-coding
1	95246623	95246959	ENSG00000122481	ENSG00000122481	RWDD3	RWD domain containing 3	0.01	+	95246623	95246959	0	2	34,204,	0,132	-3.81	-4.6	-0.782	exon (NM_001278248, exon 5 of 5)	exon (NM_001278248, exon 5 of 5)	12581	NM_015485	25950	Hs.483512	NM_015485	protein-coding
1	27154335	27166772	ENSG00000090020	ENSG00000090020	SLC9A1	solute carrier family 9 member A1	2.3e-06	-	27154335	27166772	0	3	575,51,2,	0,1018,12435	-11.5	-13	-0.78	Intergenic	AluY|SINE|Alu	-5429	NR_046474	6548	Hs.469116	NM_003047	protein-coding
1	23760711	23760921	ENSG00000011007	ENSG00000011007	ELOA	elongin A	0.014	+	23760711	23760921	0	1	210,	0	-3.49	-4.24	-0.778	non-coding (NR_038280, exon 4 of 4)	non-coding (NR_038280, exon 4 of 4)	17450	NM_003198	6924	Hs.15535	NM_003198	protein-coding
1	26886122	26886243	ENSG00000142751	ENSG00000142751	GPN2	GPN-loop GTPase 2	0.021	-	26886122	26886243	0	1	121,	0	-3.16	-3.87	-0.775	intron (NM_018066, intron 2 of 4)	intron (NM_018066, intron 2 of 4)	4100	NM_018066	54707	Hs.14333	NM_018066	protein-coding
1	6590902	6590993	ENSG00000162413	ENSG00000204859	ZBTB48	zinc finger and BTB domain containing 48	0.13	-	6590902	6590993	0	1	91,	0	-1.57	-2.03	-0.773	3' UTR (NM_014851, exon 4 of 4)	3' UTR (NM_014851, exon 4 of 4)	10954	NM_001278647	3104	Hs.502330	NM_005341	protein-coding
1	77933266	77941815	ENSG00000162614	ENSG00000162613	FUBP1	far upstream element binding protein 1	0.0051	+	77933266	77941815	0	3	213,222,105,	0,2556,8444	-4.42	-5.27	-0.771	intron (NM_001172309, intron 10 of 11)	AluSx1|SINE|Alu	41531	NR_146540	8880	Hs.567380	NM_003902	protein-coding
1	44654185	44654901	ENSG00000126106		SNORD145	small nucleolar RNA, C/D box 145	0.021	-	44654185	44654901	0	1	716,	0	-3.18	-3.88	-0.762	3' UTR (NM_001300746, exon 2 of 2)	3' UTR (NM_001300746, exon 2 of 2)	16513	NR_145816	109623472		NR_145816	snoRNA
1	9037108	9037736	ENSG00000142583	ENSG00000197241	SLC2A7	solute carrier family 2 member 7	2.5e-06	-	9037108	9037736	0	1	628,	0	-11.5	-12.9	-0.76	3' UTR (NM_001328620, exon 12 of 12)	3' UTR (NM_001328620, exon 12 of 12)	-11077	NM_207420	155184	Hs.531239	NM_207420	protein-coding
1	23760710	23760920	ENSG00000236810	ENSG00000011007	ELOA	elongin A	0.017	-	23760710	23760920	0	1	210,	0	-3.36	-4.09	-0.759	non-coding (NR_038280, exon 4 of 4)	non-coding (NR_038280, exon 4 of 4)	17449	NM_003198	6924	Hs.15535	NM_003198	protein-coding
1	212445995	212446320	ENSG00000117691	ENSG00000117691	NENF	neudesin neurotrophic factor	0.019	+	212445995	212446320	0	1	325,	0	-3.26	-3.97	-0.759	non-coding (NR_026598, exon 3 of 3)	non-coding (NR_026598, exon 3 of 3)	13238	NR_026598	29937	Hs.461787	NM_013349	protein-coding
1	231238723	231239113	ENSG00000143633	ENSG00000143633	C1orf131	chromosome 1 open reading frame 131	0.022	-	231238723	231239113	0	1	390,	0	-3.12	-3.83	-0.754	exon (NM_001300830, exon 2 of 7)	exon (NM_001300830, exon 2 of 7)	2257	NM_152379	128061	Hs.743464	NM_152379	protein-coding
1	203800107	203800468	ENSG00000058673	ENSG00000257315	ZBED6	zinc finger BED-type containing 6	7.9e-05	+	203800107	203800468	0	1	361,	0	-8.23	-9.44	-0.751	exon (NM_001174108, exon 1 of 1)	exon (NM_001174108, exon 1 of 1)	2765	NM_001174108	100381270		NM_001174108	protein-coding
1	246540887	246544533	ENSG00000162851	ENSG00000242042	LINC01743	long intergenic non-protein coding RNA 1743	0.00035	-	246540887	246544533	0	2	315,13,	0,3633	-6.87	-7.96	-0.749	intron (NM_022366, intron 7 of 7)	intron (NM_022366, intron 7 of 7)	-18423	NR_040002	255654	Hs.407570	NR_040002	ncRNA
1	54173993	54179192	ENSG00000215883	ENSG00000157211	CDCP2	CUB domain containing protein 2	0.14	-	54173993	54179192	0	3	829,116,44,	0,1551,5155	-1.52	-1.96	-0.742	intron (NM_001353354, intron 6 of 6)	intron (NM_001353354, intron 6 of 6)	-23412	NM_201546	200008		NM_201546	protein-coding
1	162561774	162576783	ENSG00000117143	ENSG00000117143	UAP1	UDP-N-acetylglucosamine pyrophosphorylase 1	0.0013	+	162561774	162576783	0	4	3,72,337,7,	0,698,4237,15002	-5.64	-6.62	-0.742	intron (NM_003115, intron 2 of 9)	intron (NM_003115, intron 2 of 9)	7380	NM_001324114	6675	Hs.492859	NM_003115	protein-coding
1	192578924	192579822	ENSG00000090104	ENSG00000090104	RGS1	regulator of G protein signaling 1	2.8e-09	+	192578924	192579822	0	2	31,686,	0,212	-18	-19.7	-0.742	3' UTR (NM_002922, exon 5 of 5)	3' UTR (NM_002922, exon 5 of 5)	3600	NM_002922	5996	Hs.75256	NM_002922	protein-coding
1	16888567	16889356	ENSG00000238142	ENSG00000238142	LOC105376805	uncharacterized LOC105376805	0.17	-	16888567	16889356	0	2	218,141,	0,648	-1.36	-1.78	-0.739	intron (NR_135058, intron 1 of 1)	CpG	516	NR_135056	105376805	Hs.465405	NR_135056	ncRNA
1	22030296	22031163	ENSG00000218510	ENSG00000228397	LINC01635	long intergenic non-protein coding RNA 1635	0.02	+	22030296	22031163	0	1	867,	0	-3.22	-3.93	-0.733	non-coding (NR_023918, exon 2 of 2)	non-coding (NR_023918, exon 2 of 2)	-4682	NR_110692	101928043	Hs.617422	NR_110692	ncRNA
1	100504903	100518665	ENSG00000079335	ENSG00000181656	GPR88	G protein-coupled receptor 88	0.022	+	100504903	100518665	0	2	34,415,	0,13347	-3.12	-3.82	-0.727	intron (NM_001319210, intron 16 of 16)	intron (NM_001319210, intron 16 of 16)	-26355	NM_022049	54112	Hs.170053	NM_022049	protein-coding
1	203800112	203800473	ENSG00000257315	ENSG00000257315	ZBED6	zinc finger BED-type containing 6	0.00014	+	203800112	203800473	0	1	361,	0	-7.73	-8.9	-0.727	exon (NM_001174108, exon 1 of 1)	exon (NM_001174108, exon 1 of 1)	2770	NM_001174108	100381270		NM_001174108	protein-coding
1	1216907	1217298	ENSG00000078808	ENSG00000186827	TNFRSF4	TNF receptor superfamily member 4	5e-06	-	1216907	1217298	0	1	391,	0	-10.8	-12.2	-0.724	3' UTR (NM_016547, exon 7 of 7)	3' UTR (NM_016547, exon 7 of 7)	-2950	NM_003327	7293	Hs.129780	NM_003327	protein-coding
1	84554987	84555286	ENSG00000285851	ENSG00000117151	CTBS	chitobiase	0.0019	-	84554987	84555286	0	1	299,	0	-5.31	-6.26	-0.722	exon (NM_004388, exon 7 of 7)	exon (NM_004388, exon 7 of 7)	19303	NM_004388	1486	Hs.513557	NM_004388	protein-coding
1	111440948	111441364	ENSG00000243960	ENSG00000116455	WDR77	WD repeat domain 77	1.7e-05	-	111440948	111441364	0	1	416,	0	-9.68	-11	-0.722	non-coding (NR_133654, exon 9 of 9)	non-coding (NR_133654, exon 9 of 9)	8100	NM_024102	79084	Hs.204773	NM_024102	protein-coding
1	232805814	232808318	ENSG00000212916	ENSG00000212916	MAP10	microtubule associated protein 10	7.5e-06	+	232805814	232808318	0	1	2504,	0	-10.5	-11.8	-0.721	exon (NM_019090, exon 1 of 1)	exon (NM_019090, exon 1 of 1)	2174	NM_019090	54627	Hs.160373	NM_019090	protein-coding
1	214336920	214337131	ENSG00000143499	ENSG00000143499	SMYD2	SET and MYND domain containing 2	0.048	+	214336920	214337131	0	1	211,	0	-2.42	-3.03	-0.719	3' UTR (NM_020197, exon 12 of 12)	3' UTR (NM_020197, exon 12 of 12)	55867	NM_020197	56950	Hs.66170	NM_020197	protein-coding
1	15573304	15573692	ENSG00000116771	ENSG00000116771	AGMAT	agmatinase	0.079	-	15573304	15573692	0	1	388,	0	-2	-2.54	-0.718	3' UTR (NM_024758, exon 7 of 7)	3' UTR (NM_024758, exon 7 of 7)	11553	NM_024758	79814	Hs.461532	NM_024758	protein-coding
1	209843617	209843857	ENSG00000117597	ENSG00000117597	UTP25	UTP25 small subunit processor component	0.13	+	209843617	209843857	0	1	240,	0	-1.59	-2.05	-0.717	intron (NM_014388, intron 11 of 11)	intron (NM_014388, intron 11 of 11)	15765	NM_014388	27042	Hs.194754	NM_014388	protein-coding
1	248825055	248825356	ENSG00000175137	ENSG00000175137	SH3BP5L	SH3 binding domain protein 5 like	0.0045	-	248825055	248825356	0	1	301,	0	-4.54	-5.41	-0.713	5' UTR (NM_030645, exon 2 of 7)	5' UTR (NM_030645, exon 2 of 7)	160	NM_001322463	80851	Hs.298573	NM_030645	protein-coding
1	115659728	115664125	ENSG00000173218	ENSG00000173218	VANGL1	VANGL planar cell polarity protein 1	0.034	+	115659728	115664125	0	2	45,465,	0,3932	-2.73	-3.38	-0.709	intron (NM_001172412, intron 3 of 7)	L1MD3|LINE|L1	19298	NM_001172412	81839	Hs.515130	NM_138959	protein-coding
1	84554988	84555198	ENSG00000117151	ENSG00000117151	CTBS	chitobiase	0.0078	-	84554988	84555198	0	1	210,	0	-4.04	-4.86	-0.7	exon (NM_004388, exon 7 of 7)	exon (NM_004388, exon 7 of 7)	19347	NM_004388	1486	Hs.513557	NM_004388	protein-coding
1	42850741	42851400	ENSG00000164011	ENSG00000164011	ZNF691	zinc finger protein 691	0.037	+	42850741	42851400	0	2	2,478,	0,181	-2.65	-3.29	-0.699	exon (NM_015911, exon 2 of 2)	exon (NM_015911, exon 2 of 2)	4458	NM_001242739	51058	Hs.20879	NM_015911	protein-coding
1	15848043	15876586	ENSG00000065526	ENSG00000179743	FLJ37453	uncharacterized LOC729614	1.1e-13	+	15848043	15876586	0	4	107,321,894,385,	0,24772,25458,28158	-27.7	-29.8	-0.698	intron (NM_015001, intron 1 of 14)	intron (NM_015001, intron 1 of 14)	-14168	NR_024279	729614	Hs.119298	NR_024279	ncRNA
1	90007406	90007616	ENSG00000162664	ENSG00000162664	ZNF326	zinc finger protein 326	0.077	+	90007406	90007616	0	1	210,	0	-2.03	-2.57	-0.693	exon (NM_182976, exon 5 of 12)	exon (NM_182976, exon 5 of 12)	12401	NM_181781	284695	Hs.306221	NM_181781	protein-coding
1	170539259	170539619	ENSG00000120370		GORAB-AS1	GORAB antisense RNA 1	0.025	+	170539259	170539619	0	1	360,	0	-2.99	-3.68	-0.687	non-coding (NR_027397, exon 2 of 5)	non-coding (NR_027397, exon 2 of 5)	-6830	NR_125958	101928650	Hs.676662	NR_125958	ncRNA
1	169792528	169792975	ENSG00000171806	ENSG00000171806	METTL18	methyltransferase like 18	0.023	-	169792528	169792975	0	1	447,	0	-3.07	-3.76	-0.683	exon (NM_001320201, exon 2 of 2)	exon (NM_001320201, exon 2 of 2)	1937	NM_001320201	92342	Hs.33922	NM_033418	protein-coding
1	223951542	223952408	ENSG00000272645		GTF2IP20	general transcription factor IIi pseudogene 20	0.00019	-	223951542	223952408	0	1	866,	0	-7.43	-8.57	-0.68	non-coding (NR_132119, exon 11 of 11)	non-coding (NR_132119, exon 11 of 11)	40669	NR_132119	441124	Hs.520589	NR_132119	pseudo
1	19906550	19906871	ENSG00000169914	ENSG00000188784	PLA2G2E	phospholipase A2 group IIE	0.097	+	19906550	19906871	0	2	66,144,	0,177	-1.83	-2.33	-0.679	intron (NM_015207, intron 7 of 7)	intron (NM_015207, intron 7 of 7)	16906	NM_014589	30814	Hs.272372	NM_014589	protein-coding
1	116521934	116544355	ENSG00000116815	ENSG00000264419	MIR548AC	microRNA 548ac	2.3e-05	-	116521934	116544355	0	3	49,264,45,	0,14030,22376	-9.38	-10.7	-0.679	intron (NM_001779, intron 3 of 5)	intron (NM_001779, intron 3 of 5)	26966	NR_039621	100616384		NR_039621	ncRNA
1	13787061	13787301	ENSG00000116731	ENSG00000116731	PRDM2	PR/SET domain 2	0.049	+	13787061	13787301	0	1	240,	0	-2.42	-3.02	-0.675	3' UTR (NM_015866, exon 9 of 9)	3' UTR (NM_015866, exon 9 of 9)	37766	NM_001007257	7799	Hs.371823	NM_012231	protein-coding
1	111440933	111441381	ENSG00000116455	ENSG00000116455	WDR77	WD repeat domain 77	1.7e-05	-	111440933	111441381	0	1	448,	0	-9.65	-11	-0.664	non-coding (NR_133654, exon 9 of 9)	non-coding (NR_133654, exon 9 of 9)	8099	NM_024102	79084	Hs.204773	NM_024102	protein-coding
1	214622097	214622278	ENSG00000117724	ENSG00000117724	CENPF	centromere protein F	3.1e-09	+	214622097	214622278	0	1	181,	0	-17.8	-19.6	-0.663	exon (NM_016343, exon 7 of 20)	exon (NM_016343, exon 7 of 20)	18993	NM_016343	1063	Hs.497741	NM_016343	protein-coding
1	35019326	35019447	ENSG00000163867	ENSG00000163867	ZMYM6	zinc finger MYM-type containing 6	0.13	-	35019326	35019447	0	1	121,	0	-1.56	-2.01	-0.662	exon (NM_007167, exon 4 of 16)	exon (NM_007167, exon 4 of 16)	12558	NM_007167	9204	Hs.533986	NM_007167	protein-coding
1	170552727	170553087	ENSG00000120370		GORAB-AS1	GORAB antisense RNA 1	0.0091	+	170552727	170553087	0	1	360,	0	-3.9	-4.7	-0.661	non-coding (NR_027397, exon 5 of 5)	non-coding (NR_027397, exon 5 of 5)	-20298	NR_125958	101928650	Hs.676662	NR_125958	ncRNA
1	68482053	68482714	ENSG00000024526	ENSG00000234264	DEPDC1-AS1	DEPDC1 antisense RNA 1	0.03	-	68482053	68482714	0	1	661,	0	-2.83	-3.5	-0.66	exon (NM_001114120, exon 8 of 12)	exon (NM_001114120, exon 8 of 12)	-14292	NR_110671	101927220	Hs.382856	NR_110671	ncRNA
1	167641624	167641864	ENSG00000198771	ENSG00000198771	RCSD1	RCSD domain containing 1	0.095	+	167641624	167641864	0	1	240,	0	-1.84	-2.35	-0.66	non-coding (NR_136519, exon 3 of 3)	non-coding (NR_136519, exon 3 of 3)	11512	NM_052862	92241	Hs.493867	NM_052862	protein-coding
1	40494972	40496313	ENSG00000187815	ENSG00000164002	EXO5	exonuclease 5	0.00075	+	40494972	40496313	0	1	1341,	0	-6.17	-7.2	-0.658	exon (NM_001320179, exon 6 of 6)	exon (NM_001320179, exon 6 of 6)	-13076	NM_001346949	64789	Hs.59584	NM_022774	protein-coding
1	241497632	241497871	ENSG00000091483	ENSG00000091483	FH	fumarate hydratase	0.064	-	241497632	241497871	0	1	239,	0	-2.18	-2.75	-0.656	3' UTR (NM_000143, exon 10 of 10)	3' UTR (NM_000143, exon 10 of 10)	22033	NM_000143	2271	Hs.592490	NM_000143	protein-coding
1	87104486	87105056	ENSG00000153936	ENSG00000267272	LINC01140	long intergenic non-protein coding RNA 1140	1.9e-06	+	87104486	87105056	0	1	570,	0	-11.8	-13.2	-0.652	3' UTR (NM_012262, exon 7 of 7)	3' UTR (NM_012262, exon 7 of 7)	-24994	NR_026989	339524	Hs.306423	NM_207357	ncRNA
1	88853050	88857265	ENSG00000137947	ENSG00000137947	GTF2B	general transcription factor IIB	3.4e-07	-	88853050	88857265	0	2	296,60,	0,4155	-13.4	-14.9	-0.644	intron (NM_001514, intron 6 of 6)	intron (NM_001514, intron 6 of 6)	36409	NM_001514	2959	Hs.481852	NM_001514	protein-coding
1	247037229	247038361	ENSG00000277462	ENSG00000197472	ZNF695	zinc finger protein 695	0.013	-	247037229	247038361	0	1	1132,	0	-3.57	-4.33	-0.644	exon (NM_001204220, exon 4 of 4)	exon (NM_001204220, exon 4 of 4)	-29738	NM_020394	57116	Hs.669893	NM_020394	protein-coding
1	161124137	161124435	ENSG00000158796	ENSG00000158793	NIT1	nitrilase 1	0.01	-	161124137	161124435	0	1	298,	0	-3.82	-4.61	-0.643	exon (NM_001330765, exon 3 of 6)	exon (NM_001330765, exon 3 of 6)	6168	NM_001185094	4817	Hs.146406	NM_005600	protein-coding
1	58781627	58782348	ENSG00000177606	ENSG00000177606	JUN	Jun proto-oncogene, AP-1 transcription factor subunit	8.3e-06	-	58781627	58782348	0	1	721,	0	-10.4	-11.7	-0.642	3' UTR (NM_002228, exon 1 of 1)	3' UTR (NM_002228, exon 1 of 1)	2059	NM_002228	3725	Hs.696684	NM_002228	protein-coding
1	150265997	150266267	ENSG00000117362	ENSG00000117362	APH1A	aph-1 homolog A, gamma-secretase subunit	1.4e-07	-	150265997	150266267	0	1	270,	0	-14.3	-15.8	-0.641	non-coding (NR_045033, exon 6 of 6)	non-coding (NR_045033, exon 6 of 6)	2884	NM_001077628	51107	Hs.108408	NM_016022	protein-coding
1	150308233	150308562	ENSG00000266472	ENSG00000117360	PRPF3	pre-mRNA processing factor 3	7.5e-06	+	150308233	150308562	0	1	329,	0	-10.5	-11.8	-0.638	3' UTR (NM_018997, exon 2 of 2)	3' UTR (NM_018997, exon 2 of 2)	-13070	NM_001350529	9129	Hs.11776	NM_004698	protein-coding
1	230691790	230693772	ENSG00000135775	ENSG00000135744	AGT	angiotensinogen	0.0013	+	230691790	230693772	0	2	29,481,	0,1501	-5.68	-6.66	-0.635	intron (NM_007357, intron 17 of 17)	(TG)n|Simple_repeat|Simple_repeat	21341	NM_000029	183	Hs.19383	NM_000029	protein-coding
1	31919426	31919636	ENSG00000184007	ENSG00000184007	PTP4A2	protein tyrosine phosphatase 4A2	9.2e-08	-	31919426	31919636	0	1	210,	0	-14.6	-16.2	-0.633	5' UTR (NM_001369859, exon 3 of 7)	5' UTR (NM_001369859, exon 3 of 7)	18287	NM_001369859	8073	Hs.470477	NM_003479	protein-coding
1	160827810	160828261	ENSG00000122224	ENSG00000122224	LY9	lymphocyte antigen 9	0.026	+	160827810	160828261	0	1	451,	0	-2.97	-3.65	-0.633	3' UTR (NM_001261456, exon 10 of 10)	3' UTR (NM_001261456, exon 10 of 10)	31862	NM_001261457	4063	Hs.403857	NM_002348	protein-coding
1	39385488	39387646	ENSG00000127603	ENSG00000127603	KIAA0754	KIAA0754	1.1e-06	+	39385488	39387646	0	2	441,460,	0,1698	-12.2	-13.7	-0.629	intron (NM_012090, intron 51 of 92)	AluSg|SINE|Alu	-22506	NM_015038	643314	Hs.658760	NM_015038	protein-coding
1	235329290	235329911	ENSG00000152904	ENSG00000152904	GGPS1	geranylgeranyl diphosphate synthase 1	0.097	+	235329290	235329911	0	2	139,191,	0,430	-1.82	-2.33	-0.627	intron (NR_036605, intron 1 of 2)	L2b|LINE|L2	1031	NR_036605	9453	Hs.730768	NM_004837	protein-coding
1	39753504	39761226	ENSG00000084072	ENSG00000198754	OXCT2	3-oxoacid CoA-transferase 2	0.017	+	39753504	39761226	0	2	212,28,	0,7694	-3.33	-4.05	-0.624	TTS (NR_036543)	TTS (NR_036543)	13983	NM_022120	64064	Hs.472491	NM_022120	protein-coding
1	209675820	209676388	ENSG00000123689	ENSG00000123689	G0S2	G0/G1 switch 2	0.014	+	209675820	209676388	0	1	568,	0	-3.54	-4.3	-0.621	promoter-TSS (NR_134511)	promoter-TSS (NR_134511)	692	NM_015714	50486	Hs.432132	NM_015714	protein-coding
1	11023240	11024243	ENSG00000277726	ENSG00000120948	TARDBP	TAR DNA binding protein	1e-07	+	11023240	11024243	0	2	89,180,	0,823	-14.5	-16.1	-0.619	3' UTR (NM_007375, exon 6 of 6)	3' UTR (NM_007375, exon 6 of 6)	11120	NM_007375	23435	Hs.300624	NM_007375	protein-coding
1	156055267	156055568	ENSG00000116586	ENSG00000116586	LAMTOR2	late endosomal/lysosomal adaptor, MAPK and MTOR activator 2	0.0025	+	156055267	156055568	0	1	301,	0	-5.09	-6.01	-0.618	exon (NM_001145264, exon 2 of 3)	exon (NM_001145264, exon 2 of 3)	636	NM_001145264	28956	Hs.632483	NM_014017	protein-coding
1	160799852	160800122	ENSG00000122224	ENSG00000122224	LY9	lymphocyte antigen 9	0.16	+	160799852	160800122	0	1	270,	0	-1.41	-1.83	-0.618	exon (NM_001033667, exon 2 of 3)	exon (NM_001033667, exon 2 of 3)	3813	NM_001261457	4063	Hs.403857	NM_002348	protein-coding
1	7827275	7827576	ENSG00000049246	ENSG00000049247	UTS2	urotensin 2	0.092	+	7827275	7827576	0	1	301,	0	-1.88	-2.39	-0.617	exon (NM_001289863, exon 18 of 23)	exon (NM_001289863, exon 18 of 23)	25639	NM_006786	10911	Hs.715862	NM_006786	protein-coding
1	94530242	94532326	ENSG00000117525	ENSG00000117525	F3	coagulation factor III, tissue factor	0.031	-	94530242	94532326	0	2	354,6,	0,2078	-2.81	-3.47	-0.612	intron (NM_001178096, intron 4 of 4)	intron (NM_001178096, intron 4 of 4)	10475	NM_001993	2152	Hs.62192	NM_001993	protein-coding
1	156292827	156293096	ENSG00000163472	ENSG00000198952	SMG5	SMG5 nonsense mediated mRNA decay factor	0.16	+	156292827	156293096	0	1	269,	0	-1.4	-1.82	-0.612	TTS (NR_026678)	TTS (NR_026678)	-1464	NM_001323617	23381	Hs.516837	NM_015327	protein-coding
1	108971259	108974581	ENSG00000085433	ENSG00000121940	CLCC1	chloride channel CLIC like 1	0.08	-	108971259	108974581	0	2	313,46,	0,3276	-1.98	-2.52	-0.61	intron (NM_014969, intron 14 of 14)	AluY|SINE|Alu	-9421	NM_001048210	23155	Hs.658489	NM_015127	protein-coding
1	1662363	1662664	ENSG00000189339	ENSG00000248333	CDK11B	cyclin dependent kinase 11B	0.056	-	1662363	1662664	0	1	301,	0	-2.3	-2.88	-0.608	3' UTR (NM_001290264, exon 10 of 10)	3' UTR (NM_001290264, exon 10 of 10)	-3510	NM_033490	984	Hs.651228	NM_001787	protein-coding
1	206453665	206453786	ENSG00000266028	ENSG00000263528	IKBKE	inhibitor of nuclear factor kappa B kinase subunit epsilon	0.17	+	206453665	206453786	0	1	121,	0	-1.36	-1.77	-0.608	intron (NM_015326, intron 19 of 21)	intron (NM_015326, intron 19 of 21)	-16750	NM_001193321	9641	Hs.321045	NM_014002	protein-coding
1	1598011	1598667	ENSG00000228594		LOC105378586	uncharacterized LOC105378586	0.076	-	1598011	1598667	0	1	656,	0	-2.04	-2.58	-0.607	3' UTR (NM_001242659, exon 1 of 1)	3' UTR (NM_001242659, exon 1 of 1)	-1094	NR_147951	105378586	Hs.633349	NR_147951	ncRNA
1	74204758	74205267	ENSG00000254685	ENSG00000259030	FPGT-TNNI3K	FPGT-TNNI3K readthrough	0.066	+	74204758	74205267	0	1	509,	0	-2.15	-2.72	-0.604	exon (NM_003838, exon 4 of 4)	exon (NM_003838, exon 4 of 4)	6801	NM_001112808	100526835	Hs.480085	NM_001112808	protein-coding
1	32176058	32176418	ENSG00000025800	ENSG00000084652	TXLNA	taxilin alpha	0.0037	+	32176058	32176418	0	1	360,	0	-4.71	-5.59	-0.603	3' UTR (NM_012316, exon 14 of 14)	3' UTR (NM_012316, exon 14 of 14)	-3437	NM_175852	200081	Hs.17987	NM_175852	protein-coding
1	11974670	11975538	ENSG00000083444	ENSG00000116688	MFN2	mitofusin 2	3.8e-10	+	11974670	11975538	0	1	868,	0	-19.9	-21.7	-0.602	3' UTR (NM_000302, exon 19 of 19)	3' UTR (NM_000302, exon 19 of 19)	-5077	NM_014874	9927	Hs.376681	NM_014874	protein-coding
1	26244306	26254745	ENSG00000130695	ENSG00000130695	CEP85	centrosomal protein 85	0.085	+	26244306	26254745	0	2	12,168,	0,10271	-1.94	-2.47	-0.6	intron (NM_022778, intron 3 of 13)	intron (NM_022778, intron 3 of 13)	15326	NM_022778	64793	Hs.63795	NM_022778	protein-coding
1	151156663	151166143	ENSG00000163156	ENSG00000163155	LYSMD1	LysM domain containing 1	0.17	+	151156663	151166143	0	2	59,122,	0,9358	-1.38	-1.8	-0.593	intron (NM_212551, intron 2 of 2)	AluY|SINE|Alu	4499	NM_001136543	388695	Hs.591482	NM_212551	protein-coding
1	206585166	206585467	ENSG00000266094	ENSG00000143486	EIF2D	eukaryotic translation initiation factor 2D	0.027	+	206585166	206585467	0	1	301,	0	-2.94	-3.62	-0.58	intron (NM_182665, intron 4 of 4)	intron (NM_182665, intron 4 of 4)	27148	NM_006893	1939	Hs.497581	NM_006893	protein-coding
1	206588309	206588789	ENSG00000266094	ENSG00000143486	EIF2D	eukaryotic translation initiation factor 2D	1.1e-07	+	206588309	206588789	0	1	480,	0	-14.4	-16	-0.579	3' UTR (NM_182663, exon 6 of 6)	3' UTR (NM_182663, exon 6 of 6)	23916	NM_006893	1939	Hs.497581	NM_006893	protein-coding
1	34988052	34988982	ENSG00000163867	ENSG00000243749	TMEM35B	transmembrane protein 35B	0.0024	-	34988052	34988982	0	1	930,	0	-5.12	-6.05	-0.578	exon (NM_007167, exon 16 of 16)	exon (NM_007167, exon 16 of 16)	-3170	NM_001195156	100506144	Hs.533986	NM_001195156	protein-coding
1	27099292	27099741	ENSG00000090020	ENSG00000090020	SLC9A1	solute carrier family 9 member A1	0.039	-	27099292	27099741	0	1	449,	0	-2.61	-3.24	-0.577	non-coding (NR_046474, exon 11 of 11)	non-coding (NR_046474, exon 11 of 11)	55608	NM_003047	6548	Hs.469116	NM_003047	protein-coding
1	158184154	158184896	ENSG00000158473	ENSG00000158473	CD1D	CD1d molecule	0.012	+	158184154	158184896	0	1	742,	0	-3.64	-4.41	-0.577	3' UTR (NM_001319145, exon 6 of 6)	3' UTR (NM_001319145, exon 6 of 6)	4578	NM_001766	912	Hs.1799	NM_001766	protein-coding
1	89933101	89933250	ENSG00000271949		GEMIN8P4	gem nuclear organelle associated protein 8 pseudogene 4	0.012	+	89933101	89933250	0	1	149,	0	-3.63	-4.4	-0.576	exon (NM_018103, exon 3 of 3)	exon (NM_018103, exon 3 of 3)	61790	NR_002830	492303	Hs.550796	NR_002830	pseudo
1	221736879	221739775	ENSG00000143507	ENSG00000143507	DUSP10	dual specificity phosphatase 10	0.00012	-	221736879	221739775	0	2	21,842,	0,2054	-7.84	-9.02	-0.573	intron (NR_111940, intron 1 of 2)	intron (NR_111940, intron 1 of 2)	-1427	NR_111939	11221	Hs.497822	NM_007207	protein-coding
1	853392	854562	ENSG00000228794	ENSG00000230368	FAM41C	family with sequence similarity 41 member C	0.07	+	853392	854562	0	1	1170,	0	-2.11	-2.66	-0.572	non-coding (NR_047519, exon 6 of 6)	non-coding (NR_047519, exon 6 of 6)	22825	NR_027055	284593	Hs.449006	NR_027055	ncRNA
1	35720755	35736594	ENSG00000092853	ENSG00000142686	C1orf216	chromosome 1 open reading frame 216	0.035	-	35720755	35736594	0	2	225,314,	0,15525	-2.7	-3.35	-0.571	intron (NM_001330490, intron 24 of 24)	intron (NM_001330490, intron 24 of 24)	-9791	NM_152374	127703	Hs.112023	NM_152374	protein-coding
1	26467416	26469259	ENSG00000117682		LOC101928324	uncharacterized LOC101928324	0.15	+	26467416	26469259	0	2	111,368,	0,1475	-1.44	-1.87	-0.57	promoter-TSS (NR_125952)	promoter-TSS (NR_125952)	-801	NR_125953	101928324	Hs.663256	NR_125952	ncRNA
1	153819685	153886434	ENSG00000143614	ENSG00000231827	LOC343052	immunoglobulin superfamily DCC subclass member 3 pseudogene	1.4e-05	-	153819685	153886434	0	4	50,53,336,11,	0,7872,8327,66738	-9.89	-11.2	-0.567	intron (NM_020699, intron 1 of 10)	intron (NM_020699, intron 1 of 10)	59113	NR_126565	343052	Hs.516530	NR_126565	pseudo
1	153951417	153951657	ENSG00000160741	ENSG00000198837	DENND4B	DENN domain containing 4B	2.3e-05	-	153951417	153951657	0	1	240,	0	-9.36	-10.7	-0.565	exon (NM_181715, exon 11 of 14)	exon (NM_181715, exon 11 of 14)	-4819	NM_014856	9909	Hs.744878	NM_014856	protein-coding
1	172441456	172441845	ENSG00000135845	ENSG00000135845	PIGC	phosphatidylinositol glycan anchor biosynthesis class C	0.0025	-	172441456	172441845	0	1	389,	0	-5.09	-6	-0.562	3' UTR (NM_153747, exon 2 of 2)	3' UTR (NM_153747, exon 2 of 2)	2418	NM_002642	5279	Hs.188456	NM_002642	protein-coding
1	103525870	103533779	ENSG00000185946	ENSG00000185946	RNPC3	RNA binding region (RNP1, RRM) containing 3	0.014	+	103525870	103533779	0	3	392,48,41,	0,1824,7868	-3.51	-4.27	-0.559	intron (NM_017619, intron 2 of 14)	MER1B|DNA|hAT-Charlie	4126	NM_017619	55599	Hs.632423	NM_017619	protein-coding
1	40509751	40516259	ENSG00000164002	ENSG00000164002	EXO5	exonuclease 5	0.025	+	40509751	40516259	0	2	39,1745,	0,4763	-3.01	-3.7	-0.556	intron (NM_001346951, intron 2 of 2)	MIRb|SINE|MIR	4286	NM_001346951	64789	Hs.59584	NM_022774	protein-coding
1	235329288	235329918	ENSG00000285053	ENSG00000152904	GGPS1	geranylgeranyl diphosphate synthase 1	0.021	+	235329288	235329918	0	1	630,	0	-3.16	-3.86	-0.556	intron (NR_036605, intron 1 of 2)	L2b|LINE|L2	1033	NR_036605	9453	Hs.730768	NM_004837	protein-coding
1	22030272	22031200	ENSG00000285752	ENSG00000228397	LINC01635	long intergenic non-protein coding RNA 1635	0.085	-	22030272	22031200	0	1	928,	0	-1.95	-2.47	-0.555	non-coding (NR_023918, exon 2 of 2)	non-coding (NR_023918, exon 2 of 2)	-4688	NR_110692	101928043	Hs.617422	NR_110692	ncRNA
1	27335444	27335863	ENSG00000186501	ENSG00000142765	SYTL1	synaptotagmin like 1	0.0029	+	27335444	27335863	0	1	419,	0	-4.92	-5.83	-0.553	non-coding (NR_037576, exon 7 of 7)	non-coding (NR_037576, exon 7 of 7)	-6368	NM_032872	84958	Hs.469175	NM_032872	protein-coding
1	172441464	172441854	ENSG00000135845	ENSG00000135845	PIGC	phosphatidylinositol glycan anchor biosynthesis class C	0.0026	-	172441464	172441854	0	1	390,	0	-5.04	-5.96	-0.553	3' UTR (NM_153747, exon 2 of 2)	3' UTR (NM_153747, exon 2 of 2)	2410	NM_002642	5279	Hs.188456	NM_002642	protein-coding
1	155913072	155913522	ENSG00000132680	ENSG00000143622	RIT1	Ras like without CAAX 1	0.0029	-	155913072	155913522	0	1	450,	0	-4.93	-5.84	-0.551	3' UTR (NM_014949, exon 14 of 14)	3' UTR (NM_014949, exon 14 of 14)	-1948	NM_001256820	6016	Hs.491234	NM_006912	protein-coding
1	70367657	70385309	ENSG00000197568	ENSG00000197568	HHLA3	HERV-H LTR-associating 3	0.0087	+	70367657	70385309	0	2	366,52,	0,17600	-3.95	-4.75	-0.549	Intergenic	AluSz|SINE|Alu	21672	NR_027404	11147	Hs.142245	NM_007071	protein-coding
1	150648053	150648743	ENSG00000143457	ENSG00000143420	ENSA	endosulfine alpha	7.5e-06	-	150648053	150648743	0	1	690,	0	-10.4	-11.8	-0.549	exon (NM_018178, exon 5 of 5)	exon (NM_018178, exon 5 of 5)	-18776	NM_207168	2029	Hs.632456	NM_004436	protein-coding
1	156594090	156594299	ENSG00000163382	ENSG00000163382	NAXE	NAD(P)HX epimerase	0.056	+	156594090	156594299	0	1	209,	0	-2.31	-2.89	-0.548	TTS (NM_015590)	TTS (NM_015590)	2419	NM_144772	128240	Hs.528320	NM_144772	protein-coding
1	203740790	203740941	ENSG00000058668		LINC00260	long intergenic non-protein coding RNA 260	0.11	+	203740790	203740941	0	1	151,	0	-1.76	-2.25	-0.548	3' UTR (NM_001684, exon 21 of 21)	3' UTR (NM_001684, exon 21 of 21)	10289	NR_046213	84719	Hs.661178	NM_032633	ncRNA
1	244055865	244056105	ENSG00000179456	ENSG00000179456	ZBTB18	zinc finger and BTB domain containing 18	0.072	+	244055865	244056105	0	1	240,	0	-2.08	-2.63	-0.547	3' UTR (NM_006352, exon 1 of 1)	3' UTR (NM_006352, exon 1 of 1)	2780	NM_006352	10472	Hs.69997	NM_006352	protein-coding
1	173961831	173962012	ENSG00000135870	ENSG00000135870	RC3H1	ring finger and CCCH-type domains 1	0.0074	-	173961831	173962012	0	1	181,	0	-4.09	-4.91	-0.544	exon (NM_172071, exon 11 of 19)	exon (NM_172071, exon 11 of 19)	31150	NM_001300851	149041	Hs.30258	NM_172071	protein-coding
1	111187173	111188222	ENSG00000162777	ENSG00000162777	DENND2D	DENN domain containing 2D	0.013	-	111187173	111188222	0	2	508,92,	0,957	-3.56	-4.32	-0.542	intron (NM_001271833, intron 11 of 11)	intron (NM_001271833, intron 11 of 11)	12948	NM_024901	79961	Hs.557850	NM_024901	protein-coding
1	38838585	38839601	ENSG00000116954	ENSG00000116954	RRAGC	Ras related GTP binding C	0.00029	-	38838585	38839601	0	1	1016,	0	-7.02	-8.13	-0.541	3' UTR (NM_001271851, exon 7 of 7)	3' UTR (NM_001271851, exon 7 of 7)	20679	NM_022157	64121	Hs.532461	NM_022157	protein-coding
1	149900112	149900798	ENSG00000178096	ENSG00000178096	BOLA1	bolA family member 1	0.017	+	149900112	149900798	0	1	686,	0	-3.35	-4.08	-0.541	exon (NM_016074, exon 2 of 2)	exon (NM_016074, exon 2 of 2)	887	NM_016074	51027	Hs.13880	NM_016074	protein-coding
1	35714084	35714894	ENSG00000142686	ENSG00000142686	C1orf216	chromosome 1 open reading frame 216	0.04	-	35714084	35714894	0	1	810,	0	-2.6	-3.22	-0.538	3' UTR (NM_001348691, exon 2 of 2)	3' UTR (NM_001348691, exon 2 of 2)	2422	NM_001348691	127703	Hs.112023	NM_152374	protein-coding
1	161756789	161757119	ENSG00000081721	ENSG00000081721	DUSP12	dual specificity phosphatase 12	0.011	+	161756789	161757119	0	1	330,	0	-3.7	-4.48	-0.538	3' UTR (NM_007240, exon 6 of 6)	3' UTR (NM_007240, exon 6 of 6)	7168	NM_007240	11266	Hs.416216	NM_007240	protein-coding
1	179107424	179109284	ENSG00000143322	ENSG00000186283	TOR3A	torsin family 3 member A	0.00051	-	179107424	179109284	0	1	1860,	0	-6.52	-7.58	-0.537	exon (NM_005158, exon 12 of 12)	exon (NM_005158, exon 12 of 12)	26284	NM_022371	64222	Hs.584957	NM_022371	protein-coding
1	10442380	10451495	ENSG00000251503	ENSG00000241563	CORT	cortistatin	0.046	+	10442380	10451495	0	2	61,119,	0,8996	-2.46	-3.07	-0.536	intron (NM_001270517, intron 5 of 5)	AluJo|SINE|Alu	-3093	NM_001302	1325	Hs.412311	NM_001302	protein-coding
1	54757610	54758917	ENSG00000162396	ENSG00000162396	PARS2	prolyl-tRNA synthetase 2, mitochondrial	0.094	-	54757610	54758917	0	1	1307,	0	-1.85	-2.36	-0.533	exon (NM_152268, exon 2 of 2)	exon (NM_152268, exon 2 of 2)	6259	NM_152268	25973	Hs.380169	NM_152268	protein-coding
1	178441593	178443191	ENSG00000075391	ENSG00000240021	TEX35	testis expressed 35	0.0011	+	178441593	178443191	0	2	54,517,	0,1081	-5.84	-6.85	-0.532	intron (NM_004841, intron 5 of 15)	intron (NM_004841, intron 5 of 15)	-70717	NM_001170722	84066	Hs.534501	NM_032126	protein-coding
1	44410639	44419499	ENSG00000187147	ENSG00000187147	RNF220	ring finger protein 220	0.00018	+	44410639	44419499	0	3	48,746,196,	0,1341,8664	-7.48	-8.63	-0.529	intron (NM_001319956, intron 2 of 14)	intron (NM_001319956, intron 2 of 14)	-8932	NM_001319957	55182	Hs.456557	NM_018150	protein-coding
1	169793093	169794817	ENSG00000171806	ENSG00000171806	METTL18	methyltransferase like 18	0.03	-	169793093	169794817	0	3	804,57,3,	0,1539,1721	-2.85	-3.52	-0.528	promoter-TSS (NM_001320051)	promoter-TSS (NM_001320051)	734	NM_001320201	92342	Hs.33922	NM_033418	protein-coding
1	148433195	148433436	ENSG00000274020	ENSG00000274020	LINC01138	long intergenic non-protein coding RNA 1138	0.15	-	148433195	148433436	0	1	241,	0	-1.46	-1.9	-0.527	TTS (NR_111930)	TTS (NR_111930)	26604	NR_104014	388685	Hs.713362	NM_207400	ncRNA
1	160289583	160289674	ENSG00000122218	ENSG00000162735	PEX19	peroxisomal biogenesis factor 19	0.016	-	160289583	160289674	0	1	91,	0	-3.42	-4.16	-0.526	3' UTR (NM_004371, exon 33 of 33)	3' UTR (NM_004371, exon 33 of 33)	-4478	NR_036492	5824	Hs.517232	NM_002857	protein-coding
1	85267484	85275045	ENSG00000142867		LOC646626	uncharacterized LOC646626	2.5e-05	-	85267484	85275045	0	4	498,161,289,102,	0,1569,3133,7459	-9.27	-10.6	-0.523	intron (NM_001320715, intron 1 of 2)	intron (NM_001320715, intron 1 of 2)	-5093	NR_045484	646626	Hs.193516	NR_045484	ncRNA
1	1234441	1235041	ENSG00000176022	ENSG00000176022	B3GALT6	beta-1,3-galactosyltransferase 6	0.11	+	1234441	1235041	0	1	600,	0	-1.74	-2.23	-0.522	3' UTR (NM_080605, exon 1 of 1)	3' UTR (NM_080605, exon 1 of 1)	2504	NM_080605	126792	Hs.284284	NM_080605	protein-coding
1	245083660	245083721	ENSG00000203666	ENSG00000162849	KIF26B	kinesin family member 26B	0.046	+	245083660	245083721	0	1	61,	0	-2.46	-3.07	-0.52	intron (NM_001143943, intron 6 of 6)	intron (NM_001143943, intron 6 of 6)	-71294	NM_018012	55083	Hs.143134	NM_018012	protein-coding
1	45693758	45694027	ENSG00000159596	ENSG00000159596	TMEM69	transmembrane protein 69	0.00011	+	45693758	45694027	0	1	269,	0	-7.9	-9.08	-0.519	TTS (NM_001145349)	TTS (NM_001145349)	5712	NM_016486	51249	Hs.699548	NM_016486	protein-coding
1	155749691	155751835	ENSG00000116580		MSTO2P	misato family member 2, pseudogene	0.0083	-	155749691	155751835	0	2	1042,69,	0,2075	-3.98	-4.79	-0.517	TTS (NR_024117).2	TTS (NR_024117).2	4995	NR_024117	100129405	Hs.656361	NR_024117	pseudo
1	156200102	156207880	ENSG00000160785	ENSG00000260238	PMF1-BGLAP	PMF1-BGLAP readthrough	0.11	+	156200102	156207880	0	2	370,19,	0,7759	-1.72	-2.21	-0.51	intron (NM_014655, intron 2 of 3)	AluY|SINE|Alu	-8997	NM_001199662	100527963	Hs.530479	NM_001199661	protein-coding
1	143882261	143883575	ENSG00000265531	ENSG00000265531	FCGR1CP	Fc fragment of IgG receptor Ic, pseudogene	0.14	+	143882261	143883575	0	2	135,281,	0,1033	-1.51	-1.96	-0.508	intron (NR_027484, intron 5 of 5)	intron (NR_027484, intron 5 of 5)	8175	NR_027484	100132417	Hs.77424	NM_001128589	pseudo
1	150960582	150963085	ENSG00000143418	ENSG00000143418	CERS2	ceramide synthase 2	0.019	-	150960582	150963085	0	2	173,128,	0,2375	-3.27	-3.98	-0.508	intron (NM_001366417, intron 16 of 21)	intron (NM_001366417, intron 16 of 21)	13001	NM_022075	29956	Hs.744017	NM_013384	protein-coding
1	19682689	19683256	ENSG00000162542	ENSG00000158748	HTR6	5-hydroxytryptamine receptor 6	0.1	-	19682689	19683256	0	1	567,	0	-1.79	-2.29	-0.504	3' UTR (NM_001349113, exon 16 of 16)	3' UTR (NM_001349113, exon 16 of 16)	18098	NM_000871	3362	Hs.22180	NM_000871	protein-coding
1	203682830	203698187	ENSG00000058668	ENSG00000221643	SNORA77	small nucleolar RNA, H/ACA box 77	3.1e-06	+	203682830	203698187	0	2	568,31,	0,15326	-11.3	-12.7	-0.503	intron (NM_001001396, intron 2 of 21)	intron (NM_001001396, intron 2 of 21)	-39072	NR_003019	677843	Hs.676135	NR_003019	snoRNA
1	39969548	39969968	ENSG00000168389	ENSG00000168389	MFSD2A	major facilitator superfamily domain containing 2A	0.089	+	39969548	39969968	0	1	420,	0	-1.9	-2.42	-0.502	non-coding (NR_109896, exon 12 of 12)	non-coding (NR_109896, exon 12 of 12)	14613	NM_001349821	84879	Hs.655177	NM_032793	protein-coding
1	155832889	155857212	ENSG00000116580	ENSG00000116580	GON4L	gon-4 like	0.0041	-	155832889	155857212	0	3	61,534,66,	0,20386,24257	-4.61	-5.49	-0.502	intron (NM_032292, intron 2 of 20)	MER66-int|LTR|ERV1	12163	NM_001282861	54856	Hs.656361	NM_032292	protein-coding
1	114397353	114397922	ENSG00000197323	ENSG00000197323	TRIM33	tripartite motif containing 33	5.5e-05	-	114397353	114397922	0	1	569,	0	-8.57	-9.8	-0.501	3' UTR (NM_033020, exon 19 of 19)	3' UTR (NM_033020, exon 19 of 19)	113565	NM_033020	51592	Hs.26837	NM_015906	protein-coding
1	224227333	224227573	ENSG00000143748	ENSG00000237101	LOC101927164	uncharacterized LOC101927164	0.054	-	224227333	224227573	0	1	240,	0	-2.33	-2.92	-0.5	non-coding (NR_110668, exon 3 of 3)	non-coding (NR_110668, exon 3 of 3)	7840	NR_110668	101927164	Hs.710128	NR_110668	ncRNA
1	228650839	228651379	ENSG00000183929	ENSG00000202526	RNA5S13	RNA, 5S ribosomal 13	0.14	+	228650839	228651379	0	1	540,	0	-1.52	-1.97	-0.5	non-coding (NR_002834, exon 2 of 2)	non-coding (NR_002834, exon 2 of 2)	-4951	NR_023375	100169764		NR_023375	rRNA
1	153634101	153634161	ENSG00000160679	ENSG00000160679	CHTOP	chromatin target of PRMT1	0.16	+	153634101	153634161	0	1	60,	0	-1.42	-1.85	-0.499	promoter-TSS (NM_015607)	promoter-TSS (NM_015607)	65	NM_015607	26097	Hs.611057	NM_015607	protein-coding
1	211663340	211663519	ENSG00000117650	ENSG00000117650	NEK2	NIMA related kinase 2	0.028	-	211663340	211663519	0	1	179,	0	-2.89	-3.56	-0.495	exon (NM_002497, exon 8 of 8)	exon (NM_002497, exon 8 of 8)	12191	NM_002497	4751	Hs.153704	NM_002497	protein-coding
1	35506688	35533099	ENSG00000142687	ENSG00000142687	KIAA0319L	KIAA0319 like	0.12	-	35506688	35533099	0	2	447,4,	0,26407	-1.65	-2.12	-0.494	intron (NM_024874, intron 2 of 20)	L2c|LINE|L2	37509	NM_024874	79932	Hs.456507	NM_024874	protein-coding
1	55066418	55067497	ENSG00000162402	ENSG00000169174	PCSK9	proprotein convertase subtilisin/kexin type 9	0.00039	-	55066418	55067497	0	1	1079,	0	-6.76	-7.84	-0.492	3' UTR (NM_015306, exon 68 of 68)	3' UTR (NM_015306, exon 68 of 68)	26736	NR_110451	255738	Hs.18844	NM_174936	protein-coding
1	52237534	52239481	ENSG00000157077	ENSG00000157077	ZFYVE9	zinc finger FYVE-type containing 9	0.0071	+	52237534	52239481	0	1	1947,	0	-4.12	-4.95	-0.487	exon (NM_004799, exon 4 of 19)	exon (NM_004799, exon 4 of 19)	96414	NM_004799	9372	Hs.532345	NM_004799	protein-coding
1	226986674	226986885	ENSG00000163050	ENSG00000163050	COQ8A	coenzyme Q8A	0.09	+	226986674	226986885	0	1	211,	0	-1.89	-2.41	-0.487	3' UTR (NM_020247, exon 15 of 15)	3' UTR (NM_020247, exon 15 of 15)	46486	NM_020247	56997	Hs.118241	NM_020247	protein-coding
1	1319190	1319671	ENSG00000127054	ENSG00000127054	INTS11	integrator complex subunit 11	0.0037	-	1319190	1319671	0	1	481,	0	-4.71	-5.59	-0.485	exon (NM_001256456, exon 6 of 19)	exon (NM_001256456, exon 6 of 19)	5229	NM_017871	54973	Hs.6449	NM_017871	protein-coding
1	173857488	173857848	ENSG00000117593		GAS5-AS1	GAS5 antisense RNA 1	0.024	+	173857488	173857848	0	1	360,	0	-3.03	-3.72	-0.484	exon (NM_018122, exon 17 of 17)	exon (NM_018122, exon 17 of 17)	-5580	NR_037605	100506046	Hs.656411	NR_037605	ncRNA
1	35559233	35560851	ENSG00000020129	ENSG00000020129	NCDN	neurochondrin	0.11	+	35559233	35560851	0	2	14,526,	0,1092	-1.75	-2.25	-0.483	intron (NM_014284, intron 2 of 6)	L3b|LINE|CR1	2243	NM_014284	23154	Hs.121870	NM_014284	protein-coding
1	235342102	235342733	ENSG00000152904	ENSG00000152904	GGPS1	geranylgeranyl diphosphate synthase 1	4.1e-07	+	235342102	235342733	0	1	631,	0	-13.1	-14.7	-0.482	non-coding (NR_036605, exon 3 of 3)	non-coding (NR_036605, exon 3 of 3)	13848	NR_036605	9453	Hs.730768	NM_004837	protein-coding
1	192811162	192811924	ENSG00000116741	ENSG00000116741	RGS2	regulator of G protein signaling 2	0.018	+	192811162	192811924	0	2	77,523,	0,239	-3.31	-4.03	-0.48	exon (NM_002923, exon 5 of 5)	exon (NM_002923, exon 5 of 5)	2504	NM_002923	5997	Hs.78944	NM_002923	protein-coding
1	111477398	111478512	ENSG00000143110	ENSG00000143110	C1orf162	chromosome 1 open reading frame 162	4.1e-05	+	111477398	111478512	0	3	30,125,530,	0,252,584	-8.86	-10.1	-0.479	intron (NM_001300835, intron 4 of 4)	intron (NM_001300835, intron 4 of 4)	3971	NM_001300835	128346	Hs.288010	NM_174896	protein-coding
1	6592665	6593084	ENSG00000162413	ENSG00000162413	KLHL21	kelch like family member 21	0.055	-	6592665	6593084	0	1	419,	0	-2.31	-2.9	-0.478	3' UTR (NM_014851, exon 4 of 4)	3' UTR (NM_014851, exon 4 of 4)	9994	NM_001324309	9903	Hs.7764	NM_014851	protein-coding
1	26574850	26575030	ENSG00000117676	ENSG00000238705	MIR1976	microRNA 1976	0.0018	+	26574850	26575030	0	1	180,	0	-5.36	-6.31	-0.478	TTS (NM_001330441)	TTS (NM_001330441)	20398	NR_031740	100302190		NR_031740	ncRNA
1	37857311	37859560	ENSG00000188786	ENSG00000188786	MTF1	metal regulatory transcription factor 1	0.064	-	37857311	37859560	0	3	398,52,30,	0,1176,2219	-2.18	-2.75	-0.477	intron (NM_005955, intron 1 of 10)	MIRb|SINE|MIR	1156	NM_005955	4520	Hs.471991	NM_005955	protein-coding
1	108648289	108649358	ENSG00000162639	ENSG00000162639	HENMT1	HEN methyltransferase 1	0.0047	-	108648289	108649358	0	2	702,18,	0,1051	-4.51	-5.37	-0.477	exon (NM_144584, exon 8 of 8)	exon (NM_144584, exon 8 of 8)	12269	NM_001102592	113802	Hs.7962	NM_144584	protein-coding
1	155338119	155342014	ENSG00000116539	ENSG00000283701	MIR555	microRNA 555	0.009	-	155338119	155342014	0	3	271,41,79,	0,1208,3816	-3.91	-4.71	-0.477	intron (NM_018489, intron 25 of 27)	intron (NM_018489, intron 25 of 27)	6378	NR_030282	693140		NR_030282	ncRNA
1	28537864	28538254	ENSG00000180198	ENSG00000180098	TRNAU1AP	tRNA selenocysteine 1 associated protein 1	2.1e-07	+	28537864	28538254	0	1	390,	0	-13.8	-15.4	-0.474	non-coding (NR_030725, exon 13 of 13)	non-coding (NR_030725, exon 13 of 13)	-14958	NR_003109	54952	Hs.533626	NM_017846	protein-coding
1	121382912	121388148	ENSG00000171943	ENSG00000230806	SRGAP2-AS1	SRGAP2 antisense RNA 1	0.087	+	121382912	121388148	0	3	13,102,515,	0,3593,4721	-1.91	-2.44	-0.473	intron (NM_001271872, intron 8 of 9)	intron (NM_001271872, intron 8 of 9)	12375	NR_104189	100873165	Hs.568525	NR_104189	ncRNA
1	150950569	150951473	ENSG00000143379	ENSG00000143418	CERS2	ceramide synthase 2	0.00036	+	150950569	150951473	0	2	521,109,	0,795	-6.83	-7.92	-0.473	exon (NM_012432, exon 13 of 22)	exon (NM_012432, exon 13 of 22)	23814	NM_022075	29956	Hs.744017	NM_013384	protein-coding
1	43913384	43913835	ENSG00000126091	ENSG00000117407	ARTN	artemin	0.13	+	43913384	43913835	0	1	451,	0	-1.61	-2.07	-0.468	intron (NM_001270461, intron 8 of 8)	intron (NM_001270461, intron 8 of 8)	-19710	NM_057090	9048	Hs.632404	NM_003976	protein-coding
1	181089518	181090656	ENSG00000162783	ENSG00000162783	IER5	immediate early response 5	1.9e-20	+	181089518	181090656	0	1	1138,	0	-43	-45.4	-0.468	3' UTR (NM_016545, exon 1 of 1)	3' UTR (NM_016545, exon 1 of 1)	1387	NM_016545	51278	Hs.15725	NM_016545	protein-coding
1	227747966	227759296	ENSG00000143740	ENSG00000143740	SNAP47	synaptosome associated protein 47	0.066	+	227747966	227759296	0	2	267,302,	0,11028	-2.16	-2.72	-0.468	intron (NM_053052, intron 2 of 4)	LTR47A|LTR|ERVL	17936	NM_001323934	116841	Hs.325081	NM_053052	protein-coding
1	88982447	88983914	ENSG00000213516	ENSG00000137944	KYAT3	kynurenine aminotransferase 3	0.0047	-	88982447	88983914	0	1	1467,	0	-4.5	-5.36	-0.466	exon (NM_001162536, exon 3 of 3)	exon (NM_001162536, exon 3 of 3)	9448	NM_001008661	56267	Hs.481898	NM_001008661	protein-coding
1	154983997	154988956	ENSG00000160688	ENSG00000160688	FLAD1	flavin adenine dinucleotide synthetase 1	0.00039	+	154983997	154988956	0	2	69,1491,	0,3468	-6.77	-7.86	-0.464	intron (NM_201398, intron 2 of 7)	MIR|SINE|MIR	3133	NM_025207	80308	Hs.118666	NM_025207	protein-coding
1	203798369	203799299	ENSG00000058673	ENSG00000257315	ZBED6	zinc finger BED-type containing 6	9.2e-06	+	203798369	203799299	0	1	930,	0	-10.2	-11.6	-0.464	exon (NM_001174108, exon 1 of 1)	exon (NM_001174108, exon 1 of 1)	1311	NM_001174108	100381270		NM_001174108	protein-coding
1	109661286	109661646	ENSG00000168765	ENSG00000168765	GSTM4	glutathione S-transferase mu 4	0.027	+	109661286	109661646	0	1	360,	0	-2.93	-3.61	-0.463	non-coding (NR_024538, exon 7 of 7)	non-coding (NR_024538, exon 7 of 7)	5367	NM_000850	2948	Hs.348387	NM_000850	protein-coding
1	1728235	1728565	ENSG00000215790	ENSG00000008128	CDK11A	cyclin dependent kinase 11A	0.025	-	1728235	1728565	0	1	330,	0	-3.01	-3.7	-0.461	3' UTR (NM_182838, exon 6 of 6)	3' UTR (NM_182838, exon 6 of 6)	-4043	NM_024011	728642	Hs.651228	NM_024011	protein-coding
1	150158836	150159767	ENSG00000023902		LOC105371433	uncharacterized LOC105371433	0.00015	+	150158836	150159767	0	1	931,	0	-7.62	-8.78	-0.457	exon (NM_001304722, exon 6 of 6)	exon (NM_001304722, exon 6 of 6)	-1426	NR_135098	105371433	Hs.599366	NR_135098	ncRNA
1	203798377	203799305	ENSG00000257315	ENSG00000257315	ZBED6	zinc finger BED-type containing 6	1.2e-05	+	203798377	203799305	0	1	928,	0	-9.98	-11.3	-0.456	exon (NM_001174108, exon 1 of 1)	exon (NM_001174108, exon 1 of 1)	1318	NM_001174108	100381270		NM_001174108	protein-coding
1	159015873	159018306	ENSG00000163565	ENSG00000163565	IFI16	interferon gamma inducible protein 16	0.031	+	159015873	159018306	0	3	114,168,78,	0,659,2355	-2.82	-3.48	-0.454	intron (NM_005531, intron 4 of 10)	intron (NM_005531, intron 4 of 10)	7183	NM_001206567	3428	Hs.380250	NM_005531	protein-coding
1	39895605	39897583	ENSG00000116990	ENSG00000116990	MYCL	MYCL proto-oncogene, bHLH transcription factor	0.036	-	39895605	39897583	0	1	1978,	0	-2.69	-3.33	-0.453	3' UTR (NM_001033081, exon 2 of 2)	3' UTR (NM_001033081, exon 2 of 2)	5323	NM_001033082	4610	Hs.437922	NM_005376	protein-coding
1	42926450	42927109	ENSG00000117394	ENSG00000117394	SLC2A1	solute carrier family 2 member 1	1.4e-07	-	42926450	42927109	0	1	659,	0	-14.3	-15.8	-0.453	3' UTR (NM_006516, exon 10 of 10)	3' UTR (NM_006516, exon 10 of 10)	32088	NM_006516	6513	Hs.473721	NM_006516	protein-coding
1	23845343	23846096	ENSG00000179163	ENSG00000117305	HMGCL	3-hydroxy-3-methylglutaryl-CoA lyase	0.01	-	23845343	23846096	0	2	512,23,	0,730	-3.8	-4.59	-0.452	exon (NM_000147, exon 8 of 8)	exon (NM_000147, exon 8 of 8)	-20261	NM_001166059	3155	Hs.533444	NM_000191	protein-coding
1	25859846	25863420	ENSG00000236528	ENSG00000127423	AUNIP	aurora kinase A and ninein interacting protein	0.13	+	25859846	25863420	0	2	29,586,	0,2988	-1.57	-2.02	-0.449	3' UTR (NM_178422, exon 2 of 2)	3' UTR (NM_178422, exon 2 of 2)	-2175	NM_001287490	79000	Hs.149305	NM_024037	protein-coding
1	161599625	161601279	ENSG00000244682		HSPA7	heat shock protein family A (Hsp70) member 7	0.1	+	161599625	161601279	0	2	617,40,	0,1614	-1.8	-2.3	-0.449	non-coding (NR_047648, exon 7 of 7)	non-coding (NR_047648, exon 7 of 7)	-5607	NR_024151	3311	Hs.662180	NR_024151	pseudo
1	162599363	162599633	ENSG00000117143	ENSG00000162733	DDR2	discoidin domain receptor tyrosine kinase 2	0.032	+	162599363	162599633	0	1	270,	0	-2.79	-3.44	-0.449	3' UTR (NM_001324114, exon 10 of 10)	3' UTR (NM_001324114, exon 10 of 10)	-31365	NM_001354983	4921	Hs.275757	NM_006182	protein-coding
1	62816598	62819183	ENSG00000125703	ENSG00000125703	ATG4C	autophagy related 4C cysteine peptidase	0.009	+	62816598	62819183	0	2	210,179,	0,2406	-3.91	-4.71	-0.447	intron (NM_178221, intron 4 of 10)	intron (NM_178221, intron 4 of 10)	33759	NM_032852	84938	Hs.7353	NM_032852	protein-coding
1	23801884	23803626	ENSG00000117305	ENSG00000117308	GALE	UDP-galactose-4-epimerase	0.00037	-	23801884	23803626	0	2	680,39,	0,1703	-6.81	-7.89	-0.445	intron (NM_000191, intron 8 of 8)	intron (NM_000191, intron 8 of 8)	-2001	NM_001008216	2582	Hs.632380	NM_000403	protein-coding
1	109214605	109215115	ENSG00000031698	ENSG00000031698	SARS	seryl-tRNA synthetase	0.0019	+	109214605	109215115	0	1	510,	0	-5.34	-6.29	-0.445	non-coding (NR_034072, exon 2 of 2)	non-coding (NR_034072, exon 2 of 2)	942	NM_006513	6301	Hs.531176	NM_006513	protein-coding
1	26794902	26798039	ENSG00000060642	ENSG00000060642	PIGV	phosphatidylinositol glycan anchor biosynthesis class V	0.03	+	26794902	26798039	0	2	332,477,	0,2660	-2.84	-3.5	-0.444	intron (NM_001202554, intron 3 of 3)	L2c|LINE|L2	8283	NM_001202554	55650	Hs.259605	NM_017837	protein-coding
1	203799454	203800054	ENSG00000257315	ENSG00000257315	ZBED6	zinc finger BED-type containing 6	0.0043	+	203799454	203800054	0	1	600,	0	-4.58	-5.45	-0.441	exon (NM_001174108, exon 1 of 1)	exon (NM_001174108, exon 1 of 1)	2231	NM_001174108	100381270		NM_001174108	protein-coding
1	119032676	119034098	ENSG00000116874		WARS2-IT1	WARS2 intronic transcript 1	0.014	-	119032676	119034098	0	2	712,4,	0,1418	-3.54	-4.3	-0.44	exon (NM_201263, exon 6 of 6)	exon (NM_201263, exon 6 of 6)	-14018	NR_126447	104472716	Hs.689536	NR_126447	ncRNA
1	21679136	21679406	ENSG00000090686	ENSG00000076864	RAP1GAP	RAP1 GTPase activating protein	0.0042	-	21679136	21679406	0	1	270,	0	-4.61	-5.48	-0.439	3' UTR (NM_001350168, exon 27 of 27)	3' UTR (NM_001350168, exon 27 of 27)	-9914	NM_001145657	5909	Hs.148178	NM_002885	protein-coding
1	203799478	203800048	ENSG00000058673	ENSG00000257315	ZBED6	zinc finger BED-type containing 6	0.0054	+	203799478	203800048	0	1	570,	0	-4.38	-5.23	-0.437	exon (NM_001174108, exon 1 of 1)	exon (NM_001174108, exon 1 of 1)	2240	NM_001174108	100381270		NM_001174108	protein-coding
1	54216226	54218234	ENSG00000116221	ENSG00000116221	MRPL37	mitochondrial ribosomal protein L37	0.0039	+	54216226	54218234	0	2	118,63,	0,1945	-4.67	-5.55	-0.435	intron (NM_001330602, intron 6 of 6)	intron (NM_001330602, intron 6 of 6)	17063	NM_016491	51253	Hs.584908	NM_016491	protein-coding
1	235342090	235359913	ENSG00000285053	ENSG00000284770	TBCE	tubulin folding cofactor E	0.0002	+	235342090	235359913	0	3	256,48,87,	0,745,17736	-7.4	-8.54	-0.435	Intergenic	AluJr|SINE|Alu	-16358	NM_001287802	6905	Hs.744998	NM_003193	protein-coding
1	58782886	58783247	ENSG00000177606	ENSG00000177606	JUN	Jun proto-oncogene, AP-1 transcription factor subunit	0.052	-	58782886	58783247	0	1	361,	0	-2.36	-2.96	-0.434	exon (NM_002228, exon 1 of 1)	exon (NM_002228, exon 1 of 1)	980	NM_002228	3725	Hs.696684	NM_002228	protein-coding
1	241872115	241879186	ENSG00000174371	ENSG00000174371	EXO1	exonuclease 1	6.3e-05	+	241872115	241879186	0	2	163,438,	0,6633	-8.44	-9.67	-0.434	intron (NM_001319224, intron 11 of 14)	AluSc8|SINE|Alu	26920	NM_003686	9156	Hs.498248	NM_003686	protein-coding
1	153659514	153661563	ENSG00000143553	ENSG00000143553	SNAPIN	SNAP associated protein	0.0034	+	153659514	153661563	0	2	52,364,	0,1685	-4.8	-5.69	-0.433	intron (NM_012437, intron 3 of 3)	AluSp|SINE|Alu	1836	NM_012437	23557	Hs.32018	NM_012437	protein-coding
1	224190026	224192783	ENSG00000143753	ENSG00000143753	DEGS1	delta 4-desaturase, sphingolipid 1	1.2e-06	+	224190026	224192783	0	3	293,65,452,	0,1065,2305	-12.1	-13.6	-0.43	intron (NM_001321541, intron 3 of 3)	intron (NM_001321541, intron 3 of 3)	7725	NM_001321542	8560	Hs.299878	NM_003676	protein-coding
1	155913911	155914212	ENSG00000132680	ENSG00000143622	RIT1	Ras like without CAAX 1	0.0024	-	155913911	155914212	0	1	301,	0	-5.13	-6.05	-0.428	3' UTR (NM_014949, exon 14 of 14)	3' UTR (NM_014949, exon 14 of 14)	-2713	NM_001256820	6016	Hs.491234	NM_006912	protein-coding
1	39357400	39358744	ENSG00000127603	ENSG00000127603	KIAA0754	KIAA0754	0.0011	+	39357400	39358744	0	2	493,48,	0,1296	-5.82	-6.82	-0.427	intron (NM_012090, intron 39 of 92)	intron (NM_012090, intron 39 of 92)	-51001	NM_015038	643314	Hs.658760	NM_015038	protein-coding
1	28710600	28715317	ENSG00000162419	ENSG00000198492	YTHDF2	YTH N6-methyladenosine RNA binding protein 2	0.0048	+	28710600	28715317	0	2	42,1245,	0,3472	-4.47	-5.33	-0.426	intron (NM_001319674, intron 9 of 9)	AluY|SINE|Alu	-23662	NM_001173128	51441	Hs.532286	NM_016258	protein-coding
1	3890604	3891023	ENSG00000198912	ENSG00000198912	C1orf174	chromosome 1 open reading frame 174	0.024	-	3890604	3891023	0	1	419,	0	-3.05	-3.75	-0.425	exon (NM_207356, exon 3 of 4)	exon (NM_207356, exon 3 of 4)	9458	NM_207356	339448	Hs.103939	NM_207356	protein-coding
1	156114703	156114914	ENSG00000160789	ENSG00000160789	LMNA	lamin A/C	0.042	+	156114703	156114914	0	1	211,	0	-2.56	-3.18	-0.425	promoter-TSS (NM_001282626)	promoter-TSS (NM_001282626)	98	NM_170707	4000	Hs.594444	NM_005572	protein-coding
1	181055286	181056216	ENSG00000153029	ENSG00000153029	MR1	major histocompatibility complex, class I-related	7.5e-06	+	181055286	181056216	0	1	930,	0	-10.5	-11.8	-0.423	3' UTR (NM_001194999, exon 7 of 7)	3' UTR (NM_001194999, exon 7 of 7)	22326	NM_001310213	3140	Hs.13500	NM_001531	protein-coding
1	6580613	6581270	ENSG00000204859	ENSG00000204859	ZBTB48	zinc finger and BTB domain containing 48	0.071	+	6580613	6581270	0	1	657,	0	-2.09	-2.64	-0.42	exon (NM_005341, exon 2 of 11)	exon (NM_005341, exon 2 of 11)	948	NM_001278647	3104	Hs.502330	NM_005341	protein-coding
1	145911523	145912406	ENSG00000131779	ENSG00000143127	ITGA10	integrin subunit alpha 10	0.0061	-	145911523	145912406	0	2	212,281,	0,602	-4.26	-5.1	-0.42	non-coding (NR_073493, exon 4 of 4)	non-coding (NR_073493, exon 4 of 4)	-1776	NM_001303041	8515	Hs.158237	NM_003637	protein-coding
1	221701839	221706119	ENSG00000143507	ENSG00000143507	DUSP10	dual specificity phosphatase 10	0.0016	-	221701839	221706119	0	2	838,25,	0,4255	-5.46	-6.42	-0.418	intron (NM_007207, intron 3 of 3)	intron (NM_007207, intron 3 of 3)	32921	NR_111939	11221	Hs.497822	NM_007207	protein-coding
1	203796900	203797860	ENSG00000058673	ENSG00000257315	ZBED6	zinc finger BED-type containing 6	2e-06	+	203796900	203797860	0	1	960,	0	-11.7	-13.1	-0.416	promoter-TSS (NM_001174108)	promoter-TSS (NM_001174108)	-143	NM_001174108	100381270		NM_001174108	protein-coding
1	10442329	10442539	ENSG00000175279	ENSG00000241563	CORT	cortistatin	0.078	+	10442329	10442539	0	1	210,	0	-2.01	-2.55	-0.415	non-coding (NR_036462, exon 5 of 5)	non-coding (NR_036462, exon 5 of 5)	-7597	NM_001302	1325	Hs.412311	NM_001302	protein-coding
1	145993273	145993423	ENSG00000265972	ENSG00000265972	TXNIP	thioredoxin interacting protein	1.2e-21	-	145993273	145993423	0	1	150,	0	-45.7	-48.2	-0.415	3' UTR (NM_001313972, exon 7 of 7)	3' UTR (NM_001313972, exon 7 of 7)	2396	NM_001313972	10628	Hs.533977	NM_006472	protein-coding
1	160998027	160998448	ENSG00000158769	ENSG00000158769	F11R	F11 receptor	0.013	-	160998027	160998448	0	1	421,	0	-3.55	-4.31	-0.415	3' UTR (NM_016946, exon 10 of 10)	3' UTR (NM_016946, exon 10 of 10)	22914	NM_001348091	50848	Hs.517293	NM_016946	protein-coding
1	169376665	169377024	ENSG00000117475	ENSG00000117475	BLZF1	basic leucine zipper nuclear factor 1	0.05	+	169376665	169377024	0	1	359,	0	-2.4	-3	-0.415	exon (NM_001320972, exon 3 of 3)	exon (NM_001320972, exon 3 of 3)	8650	NM_001320973	8548	Hs.130746	NM_003666	protein-coding
1	180111012	180112152	ENSG00000135837	ENSG00000116260	QSOX1	quiescin sulfhydryl oxidase 1	4.9e-05	+	180111012	180112152	0	1	1140,	0	-8.69	-9.93	-0.415	3' UTR (NM_014810, exon 38 of 38)	3' UTR (NM_014810, exon 38 of 38)	-43251	NM_001004128	5768	Hs.719176	NM_002826	protein-coding
1	247156078	247159027	ENSG00000196418	ENSG00000196418	ZNF124	zinc finger protein 124	0.00017	-	247156078	247159027	0	2	1325,22,	0,2927	-7.53	-8.69	-0.414	intron (NM_001297568, intron 3 of 3)	intron (NM_001297568, intron 3 of 3)	14464	NM_003431	7678	Hs.421238	NM_003431	protein-coding
1	11023249	11024028	ENSG00000120948	ENSG00000120948	TARDBP	TAR DNA binding protein	7.6e-12	+	11023249	11024028	0	1	779,	0	-23.6	-25.6	-0.413	3' UTR (NM_007375, exon 6 of 6)	3' UTR (NM_007375, exon 6 of 6)	11017	NM_007375	23435	Hs.300624	NM_007375	protein-coding
1	203796910	203797869	ENSG00000257315	ENSG00000257315	ZBED6	zinc finger BED-type containing 6	2e-06	+	203796910	203797869	0	1	959,	0	-11.6	-13.1	-0.413	promoter-TSS (NM_001174108)	promoter-TSS (NM_001174108)	-133	NM_001174108	100381270		NM_001174108	protein-coding
1	45342971	45343975	ENSG00000132773	ENSG00000132781	MUTYH	mutY DNA glycosylase	0.019	+	45342971	45343975	0	2	31,894,	0,110	-3.26	-3.98	-0.411	TTS (NM_001320800)	TTS (NM_001320800)	-3003	NM_001128425	4595	Hs.271353	NM_012222	protein-coding
1	10456641	10456882	ENSG00000160049	ENSG00000241563	CORT	cortistatin	0.15	-	10456641	10456882	0	1	241,	0	-1.45	-1.88	-0.41	3' UTR (NM_004401, exon 6 of 6)	3' UTR (NM_004401, exon 6 of 6)	6731	NM_001302	1325	Hs.412311	NM_001302	protein-coding
1	9239971	9247001	ENSG00000049239	ENSG00000049239	H6PD	hexose-6-phosphate dehydrogenase/glucose 1-dehydrogenase	0.035	+	9239971	9247001	0	3	47,637,36,	0,4953,6994	-2.69	-3.34	-0.409	intron (NM_001282587, intron 1 of 4)	intron (NM_001282587, intron 1 of 4)	3639	NM_001282587	9563	Hs.463511	NM_004285	protein-coding
1	9728277	9728576	ENSG00000171608	ENSG00000171608	PIK3CD	phosphatidylinositol-4,5-bisphosphate 3-kinase catalytic subunit delta	0.0039	+	9728277	9728576	0	1	299,	0	-4.67	-5.55	-0.408	TTS (NM_001302883)	TTS (NM_001302883)	36960	NM_001350235	5293	Hs.518451	NM_005026	protein-coding
1	206647420	206648677	ENSG00000143479	ENSG00000143479	DYRK3	dual specificity tyrosine phosphorylation regulated kinase 3	0.14	+	206647420	206648677	0	1	1257,	0	-1.51	-1.96	-0.408	exon (NM_003582, exon 3 of 3)	exon (NM_003582, exon 3 of 3)	12513	NM_003582	8444	Hs.164267	NM_003582	protein-coding
1	235343032	235343153	ENSG00000152904	ENSG00000152904	GGPS1	geranylgeranyl diphosphate synthase 1	0.15	+	235343032	235343153	0	1	121,	0	-1.46	-1.9	-0.405	non-coding (NR_036605, exon 3 of 3)	non-coding (NR_036605, exon 3 of 3)	14523	NR_036605	9453	Hs.730768	NM_004837	protein-coding
1	20864506	20864687	ENSG00000075151	ENSG00000127483	HP1BP3	heterochromatin protein 1 binding protein 3	0.078	-	20864506	20864687	0	1	181,	0	-2.01	-2.55	-0.404	exon (NM_001198801, exon 20 of 35)	exon (NM_001198801, exon 20 of 35)	-77909	NM_016287	50809	Hs.142442	NM_016287	protein-coding
1	155480255	155562213	ENSG00000116539	ENSG00000235919	ASH1L-AS1	ASH1L antisense RNA 1	8.4e-09	-	155480255	155562213	0	4	2194,132,519,61,	0,39969,40844,81897	-16.9	-18.6	-0.403	exon (NM_001366177, exon 2 of 28)	exon (NM_001366177, exon 2 of 28)	-40808	NR_147963	645676	Hs.568693	NR_027023	ncRNA
1	1544712	1545163	ENSG00000160075	ENSG00000205090	TMEM240	transmembrane protein 240	0.0009	-	1544712	1545163	0	1	451,	0	-5.99	-7.01	-0.4	exon (NM_014188, exon 3 of 5)	exon (NM_014188, exon 3 of 5)	-4314	NM_001114748	339453	Hs.668654	NM_001114748	protein-coding
1	179865148	179867540	ENSG00000169905	ENSG00000169905	TOR1AIP2	torsin 1A interacting protein 2	4.1e-06	-	179865148	179867540	0	2	706,14,	0,2378	-11	-12.4	-0.4	intron (NM_001349934, intron 1 of 6)	intron (NM_001349934, intron 1 of 6)	2496	NM_001349933	163590	Hs.571797	NM_022347	protein-coding
1	11106534	11108205	ENSG00000198793	ENSG00000230337	EXOSC10-AS1	EXOSC10 antisense RNA 1	0.0015	-	11106534	11108205	0	2	966,25,	0,1646	-5.54	-6.52	-0.399	3' UTR (NM_004958, exon 58 of 58)	3' UTR (NM_004958, exon 58 of 58)	7351	NR_135063	105376736	Hs.634965	NR_135061	ncRNA
1	39387915	39411040	ENSG00000127603	ENSG00000127603	KIAA0754	KIAA0754	0.00023	+	39387915	39411040	0	2	743,1538,	0,21587	-7.26	-8.39	-0.397	intron (NM_012090, intron 52 of 92)	AluSx|SINE|Alu	-9595	NM_015038	643314	Hs.658760	NM_015038	protein-coding
1	197199433	197200063	ENSG00000177888	ENSG00000177888	ZBTB41	zinc finger and BTB domain containing 41	0.13	-	197199433	197200063	0	1	630,	0	-1.61	-2.07	-0.396	non-coding (NR_135153, exon 1 of 11)	non-coding (NR_135153, exon 1 of 11)	794	NR_135153	360023	Hs.529439	NM_194314	protein-coding
1	28914765	28993397	ENSG00000159023	ENSG00000159023	EPB41	erythrocyte membrane protein band 4.1	6.5e-05	+	28914765	28993397	0	4	8,475,80,68,	0,72665,74590,78564	-8.42	-9.64	-0.394	intron (NM_001166006, intron 1 of 14)	MER5B|DNA|hAT-Charlie	39505	NM_001166006	2035	Hs.175437	NM_004437	protein-coding
1	150578774	150579199	ENSG00000143384	ENSG00000143384	MCL1	MCL1 apoptosis regulator, BCL2 family member	0.0031	-	150578774	150579199	0	2	3,357,	0,68	-4.87	-5.77	-0.394	exon (NM_182763, exon 1 of 2)	exon (NM_182763, exon 1 of 2)	623	NM_021960	4170	Hs.632486	NM_021960	protein-coding
1	204405894	204410328	ENSG00000158615	ENSG00000158615	PPP1R15B	protein phosphatase 1 regulatory subunit 15B	4.2e-11	-	204405894	204410328	0	2	419,837,	0,3597	-22	-23.9	-0.394	intron (NM_032833, intron 1 of 1)	MIR|SINE|MIR	3706	NM_032833	84919	Hs.304376	NM_032833	protein-coding
1	11273534	11274043	ENSG00000120942	ENSG00000120942	UBIAD1	UbiA prenyltransferase domain containing 1	0.13	+	11273534	11274043	0	1	509,	0	-1.61	-2.07	-0.393	exon (NM_013319, exon 1 of 2)	exon (NM_013319, exon 1 of 2)	591	NM_013319	29914	Hs.522933	NM_013319	protein-coding
1	40462435	40463599	ENSG00000187801	ENSG00000187801	ZFP69B	ZFP69 zinc finger protein B	0.064	+	40462435	40463599	0	1	1164,	0	-2.18	-2.75	-0.387	exon (NM_023070, exon 5 of 5)	exon (NM_023070, exon 5 of 5)	12541	NM_023070	65243	Hs.133034	NM_023070	protein-coding
1	181089130	181089460	ENSG00000162783	ENSG00000162783	IER5	immediate early response 5	0.17	+	181089130	181089460	0	1	330,	0	-1.37	-1.79	-0.386	exon (NM_016545, exon 1 of 1)	exon (NM_016545, exon 1 of 1)	595	NM_016545	51278	Hs.15725	NM_016545	protein-coding
1	160998045	160998433	ENSG00000270149	ENSG00000158769	F11R	F11 receptor	0.026	-	160998045	160998433	0	1	388,	0	-2.97	-3.65	-0.385	3' UTR (NM_016946, exon 10 of 10)	3' UTR (NM_016946, exon 10 of 10)	22913	NM_001348091	50848	Hs.517293	NM_016946	protein-coding
1	145669960	145670588	ENSG00000117262	ENSG00000174827	PDZK1	PDZ domain containing 1	0.087	+	145669960	145670588	0	1	628,	0	-1.92	-2.44	-0.377	TTS (NM_002614)	TTS (NM_002614)	37094	NM_001201325	5174	Hs.444751	NM_002614	protein-coding
1	116404652	116406226	ENSG00000163399	ENSG00000203865	ATP1A1-AS1	ATP1A1 antisense RNA 1	0.096	+	116404652	116406226	0	2	122,118,	0,1456	-1.83	-2.34	-0.376	TTS (NR_024126)	TTS (NR_024126)	13120	NR_024126	84852	Hs.664752	NM_032766	ncRNA
1	9150344	9151452	ENSG00000228526	ENSG00000284357	MIR34A	microRNA 34a	0.0036	-	9150344	9151452	0	1	1108,	0	-4.75	-5.64	-0.375	TTS (NR_029610)	TTS (NR_029610)	879	NR_029610	407040		NR_029610	ncRNA
1	10033190	10033640	ENSG00000130939	ENSG00000130939	UBE4B	ubiquitination factor E4B	0.074	+	10033190	10033640	0	1	450,	0	-2.05	-2.6	-0.375	5' UTR (NM_001105562, exon 1 of 28)	5' UTR (NM_001105562, exon 1 of 28)	457	NM_006048	10277	Hs.593974	NM_006048	protein-coding
1	100017874	100022739	ENSG00000117620	ENSG00000156875	MFSD14A	major facilitator superfamily domain containing 14A	0.086	+	100017874	100022739	0	2	7,354,	0,4511	-1.92	-2.45	-0.375	intron (NM_001271685, intron 7 of 7)	L3|LINE|CR1	-17788	NM_033055	64645	Hs.124156	NM_033055	protein-coding
1	155415874	155478610	ENSG00000116539	ENSG00000237872	POU5F1P4	POU class 5 homeobox 1 pseudogene 4	1e-05	-	155415874	155478610	0	4	49,742,102,725,	0,22452,43922,62011	-10.2	-11.5	-0.372	intron (NM_018489, intron 4 of 27)	L1MEf|LINE|L1	14062	NR_034180	645682	Hs.632482	NR_034180	pseudo
1	155478818	155479358	ENSG00000116539	ENSG00000237872	POU5F1P4	POU class 5 homeobox 1 pseudogene 4	0.0032	-	155478818	155479358	0	1	540,	0	-4.83	-5.73	-0.372	exon (NM_001366177, exon 3 of 28)	exon (NM_001366177, exon 3 of 28)	45908	NR_034180	645682	Hs.632482	NR_034180	pseudo
1	161513233	161605099	ENSG00000273112	ENSG00000203747	FCGR3A	Fc fragment of IgG receptor IIIa	0.002	+	161513233	161605099	0	5	12,38,163,125,157,	0,661,4741,88006,91709	-5.29	-6.23	-0.372	Intergenic	MLT1L|LTR|ERVL-MaLR	-8429	NM_001329120	2214	Hs.372679	NM_000569	protein-coding
1	40235840	40238052	ENSG00000117000	ENSG00000188800	TMCO2	transmembrane and coiled-coil domains 2	3.7e-05	+	40235840	40238052	0	1	2212,	0	-8.98	-10.2	-0.371	exon (NM_012421, exon 8 of 8)	exon (NM_012421, exon 8 of 8)	-10991	NM_001008740	127391	Hs.406265	NM_001008740	protein-coding
1	193060266	193069628	ENSG00000116747	ENSG00000116750	UCHL5	ubiquitin C-terminal hydrolase L5	0.012	+	193060266	193069628	0	2	17,613,	0,8749	-3.67	-4.44	-0.371	intron (NM_001042370, intron 1 of 9)	intron (NM_001042370, intron 1 of 9)	-4871	NM_001350852	51377	Hs.145469	NM_015984	protein-coding
1	160565420	160579486	ENSG00000066294	ENSG00000066294	CD84	CD84 molecule	0.17	-	160565420	160579486	0	2	325,95,	0,13971	-1.36	-1.77	-0.37	intron (NM_003874, intron 1 of 6)	MIRb|SINE|MIR	7043	NM_001330742	8832	Hs.398093	NM_003874	protein-coding
1	155188197	155188646	ENSG00000185499	ENSG00000185499	MUC1	mucin 1, cell surface associated	0.16	-	155188197	155188646	0	1	449,	0	-1.42	-1.85	-0.369	exon (NM_001204286, exon 4 of 9)	exon (NM_001204286, exon 4 of 9)	4487	NM_001204294	4582	Hs.89603	NM_002456	protein-coding
1	6222868	6223258	ENSG00000116237	ENSG00000116237	ICMT	isoprenylcysteine carboxyl methyltransferase	0.049	-	6222868	6223258	0	1	390,	0	-2.41	-3.02	-0.368	3' UTR (NM_012405, exon 5 of 5)	3' UTR (NM_012405, exon 5 of 5)	12901	NM_012405	23463	Hs.515688	NM_012405	protein-coding
1	26114570	26122709	ENSG00000175087	ENSG00000175087	PDIK1L	PDLIM1 interacting kinase 1 like	0.022	+	26114570	26122709	0	2	23,873,	0,7266	-3.13	-3.83	-0.368	intron (NM_152835, intron 2 of 2)	MIRb|SINE|MIR	6816	NM_152835	149420	Hs.468801	NM_152835	protein-coding
1	32334486	32334666	ENSG00000175130	ENSG00000175130	MARCKSL1	MARCKS like 1	0.044	-	32334486	32334666	0	1	180,	0	-2.51	-3.12	-0.368	TTS (NM_004964)	TTS (NM_004964)	1657	NM_023009	65108	Hs.75061	NM_023009	protein-coding
1	54096311	54097181	ENSG00000116205	ENSG00000283749	MIR4781	microRNA 4781	0.1	+	54096311	54097181	0	1	870,	0	-1.78	-2.28	-0.368	non-coding (NR_130900, exon 4 of 5)	non-coding (NR_130900, exon 4 of 5)	42667	NR_039942	100616315		NR_039942	ncRNA
1	16250461	16251750	ENSG00000037637	ENSG00000132881	CPLANE2	ciliogenesis and planar polarity effector 2	0.0021	-	16250461	16251750	0	1	1289,	0	-5.24	-6.18	-0.367	exon (NM_018994, exon 10 of 10)	exon (NM_018994, exon 10 of 10)	-13923	NM_030907	79363	Hs.546430	NM_030907	protein-coding
1	113911280	113912833	ENSG00000118655	ENSG00000118655	DCLRE1B	DNA cross-link repair 1B	0.0041	+	113911280	113912833	0	1	1553,	0	-4.62	-5.5	-0.367	exon (NM_022836, exon 4 of 4)	exon (NM_022836, exon 4 of 4)	6731	NM_001363690	64858	Hs.591412	NM_022836	protein-coding
1	173716051	173734327	ENSG00000076321	ENSG00000076321	KLHL20	kelch like family member 20	0.042	+	173716051	173734327	0	2	15,615,	0,17661	-2.55	-3.18	-0.367	intron (NM_014458, intron 2 of 11)	intron (NM_014458, intron 2 of 11)	10208	NM_014458	27252	Hs.495035	NM_014458	protein-coding
1	212319510	212333504	ENSG00000066027	ENSG00000066027	PPP2R5A	protein phosphatase 2 regulatory subunit B'alpha	0.1	+	212319510	212333504	0	3	35,197,8,	0,9624,13986	-1.79	-2.29	-0.366	intron (NM_001199756, intron 1 of 12)	AluSz|SINE|Alu	24649	NM_001199756	5525	Hs.744012	NM_006243	protein-coding
1	32170853	32171333	ENSG00000025800	ENSG00000084652	TXLNA	taxilin alpha	0.022	+	32170853	32171333	0	1	480,	0	-3.1	-3.8	-0.364	3' UTR (NM_012316, exon 14 of 14)	3' UTR (NM_012316, exon 14 of 14)	-8582	NM_175852	200081	Hs.17987	NM_175852	protein-coding
1	15939381	15940460	ENSG00000065526	ENSG00000116809	ZBTB17	zinc finger and BTB domain containing 17	2.5e-05	+	15939381	15940460	0	1	1079,	0	-9.31	-10.6	-0.36	3' UTR (NM_015001, exon 15 of 15)	3' UTR (NM_015001, exon 15 of 15)	36211	NM_001287604	7709	Hs.433764	NM_003443	protein-coding
1	46718554	46718855	ENSG00000159658	ENSG00000159658	EFCAB14	EF-hand calcium binding domain 14	0.16	-	46718554	46718855	0	1	301,	0	-1.42	-1.85	-0.36	5' UTR (NM_014774, exon 1 of 11)	5' UTR (NM_014774, exon 1 of 11)	409	NM_014774	9813	Hs.707688	NM_014774	protein-coding
1	182599880	182600510	ENSG00000143333	ENSG00000143333	RGS16	regulator of G protein signaling 16	0.013	-	182599880	182600510	0	1	630,	0	-3.57	-4.33	-0.359	3' UTR (NM_002928, exon 5 of 5)	3' UTR (NM_002928, exon 5 of 5)	4194	NM_002928	6004	Hs.413297	NM_002928	protein-coding
1	2306854	2308472	ENSG00000157933	ENSG00000269896	LOC100129534	small nuclear ribonucleoprotein polypeptide N pseudogene	6.8e-07	+	2306854	2308472	0	1	1618,	0	-12.7	-14.2	-0.355	3' UTR (NM_003036, exon 7 of 7)	3' UTR (NM_003036, exon 7 of 7)	44998	NR_024489	100129534	Hs.655313	NM_001127577	pseudo
1	53766146	53766475	ENSG00000058804	ENSG00000174332	GLIS1	GLIS family zinc finger 1	0.17	-	53766146	53766475	0	1	329,	0	-1.38	-1.8	-0.355	non-coding (NR_033142, exon 17 of 17)	non-coding (NR_033142, exon 17 of 17)	-27147	NM_001367484	148979	Hs.306691	NM_147193	protein-coding
1	23978015	23978664	ENSG00000188529	ENSG00000188529	SRSF10	serine and arginine rich splicing factor 10	0.006	-	23978015	23978664	0	2	258,12,	0,637	-4.28	-5.12	-0.354	intron (NR_034035, intron 2 of 6)	intron (NR_034035, intron 2 of 6)	1987	NM_001191006	10772	Hs.3530	NM_006625	protein-coding
1	153544794	153544912	ENSG00000196154		LOC101928034	uncharacterized LOC101928034	0.067	-	153544794	153544912	0	1	118,	0	-2.15	-2.71	-0.354	promoter-TSS (NR_125947)	promoter-TSS (NR_125947)	-889	NR_125947	101928034	Hs.711397	NR_125947	ncRNA
1	235168194	235172638	ENSG00000054267	ENSG00000188739	RBM34	RNA binding motif protein 34	0.0045	-	235168194	235172638	0	2	458,21,	0,4423	-4.54	-5.4	-0.352	intron (NR_135074, intron 24 of 24)	intron (NR_135074, intron 24 of 24)	-9166	NR_144491	23029	Hs.535224	NM_015014	protein-coding
1	246591554	246621490	ENSG00000162852	ENSG00000162852	CNST	consortin, connexin sorting protein	0.18	+	246591554	246621490	0	2	387,62,	0,29874	-1.32	-1.72	-0.352	intron (NM_152609, intron 2 of 10)	HERVH48-int|LTR|ERV1	40066	NM_152609	163882	Hs.368353	NM_152609	protein-coding
1	151428125	151428245	ENSG00000143442	ENSG00000143442	POGZ	pogo transposable element derived with ZNF domain	0.15	-	151428125	151428245	0	1	120,	0	-1.44	-1.87	-0.351	exon (NM_207171, exon 4 of 17)	exon (NM_207171, exon 4 of 17)	14020	NM_207171	23126	Hs.489873	NM_015100	protein-coding
1	241593639	241594746	ENSG00000117009	ENSG00000203668	CHML	CHM like Rab escort protein	0.01	+	241593639	241594746	0	1	1107,	0	-3.79	-4.58	-0.351	3' UTR (NM_003679, exon 15 of 15)	3' UTR (NM_003679, exon 15 of 15)	41737	NM_001821	1122	Hs.654545	NM_001821	protein-coding
1	37537466	37540867	ENSG00000163877	ENSG00000163877	SNIP1	Smad nuclear interacting protein 1	0.0056	-	37537466	37540867	0	2	546,711,	0,2690	-4.33	-5.18	-0.35	intron (NM_024700, intron 3 of 3)	MER1A|DNA|hAT-Charlie	15126	NM_024700	79753	Hs.47232	NM_024700	protein-coding
1	201484429	201485283	ENSG00000159176	ENSG00000159176	CSRP1	cysteine and glycine rich protein 1	0.00029	-	201484429	201485283	0	2	360,1,	0,853	-7.04	-8.14	-0.349	intron (NM_001193570, intron 5 of 5)	intron (NM_001193570, intron 5 of 5)	11717	NM_001193572	1465	Hs.108080	NM_004078	protein-coding
1	24901457	24902506	ENSG00000020633	ENSG00000278034	MIR6731	microRNA 6731	0.011	-	24901457	24902506	0	1	1049,	0	-3.74	-4.52	-0.344	3' UTR (NM_004350, exon 5 of 5)	3' UTR (NM_004350, exon 5 of 5)	17434	NR_106789	102465437		NR_106789	ncRNA
1	241593642	241597776	ENSG00000054277	ENSG00000203668	CHML	CHM like Rab escort protein	0.013	-	241593642	241597776	0	2	1049,31,	0,4103	-3.56	-4.32	-0.342	TTS (NM_003679)	TTS (NM_003679)	40221	NM_001821	1122	Hs.654545	NM_001821	protein-coding
1	248916684	248918630	ENSG00000185220	ENSG00000185220	PGBD2	piggyBac transposable element derived 2	0.023	+	248916684	248918630	0	1	1946,	0	-3.06	-3.76	-0.342	exon (NM_001017434, exon 3 of 3)	exon (NM_001017434, exon 3 of 3)	11414	NM_001017434	267002	Hs.602037	NM_170725	protein-coding
1	211941681	211944861	ENSG00000143493	ENSG00000143476	DTL	denticleless E3 ubiquitin protein ligase homolog	0.0017	-	211941681	211944861	0	2	430,78,	0,3102	-5.41	-6.37	-0.34	intron (NM_015434, intron 19 of 19)	intron (NM_015434, intron 19 of 19)	-92282	NM_001286230	51514	Hs.656473	NM_016448	protein-coding
1	119914488	119915897	ENSG00000134250	ENSG00000134249	ADAM30	ADAM metallopeptidase domain 30	4.1e-05	-	119914488	119915897	0	1	1409,	0	-8.87	-10.1	-0.339	3' UTR (NM_024408, exon 34 of 34)	3' UTR (NM_024408, exon 34 of 34)	-18678	NM_021794	11085	Hs.283011	NM_021794	protein-coding
1	11922625	11923013	ENSG00000116685	ENSG00000116685	KIAA2013	KIAA2013	0.045	-	11922625	11923013	0	1	388,	0	-2.5	-3.11	-0.335	exon (NM_138346, exon 2 of 3)	exon (NM_138346, exon 2 of 3)	3608	NM_138346	90231	Hs.520094	NM_138346	protein-coding
1	9580097	9582790	ENSG00000171612	ENSG00000188807	TMEM201	transmembrane protein 201	0.14	+	9580097	9582790	0	2	137,492,	0,2201	-1.55	-2	-0.334	intron (NM_032315, intron 6 of 6)	intron (NM_032315, intron 6 of 6)	-7467	NM_001130924	199953	Hs.632365	NM_001010866	protein-coding
1	110951325	110952762	ENSG00000121931	ENSG00000121931	LRIF1	ligand dependent nuclear receptor interacting factor 1	6.1e-06	-	110951325	110952762	0	1	1437,	0	-10.6	-12	-0.334	exon (NM_018372, exon 2 of 4)	exon (NM_018372, exon 2 of 4)	11878	NM_018372	55791	Hs.25245	NM_018372	protein-coding
1	205769358	205769747	ENSG00000117280	ENSG00000117280	RAB29	RAB29, member RAS oncogene family	0.067	-	205769358	205769747	0	1	389,	0	-2.14	-2.7	-0.33	3' UTR (NM_003929, exon 6 of 6)	3' UTR (NM_003929, exon 6 of 6)	5929	NM_001135664	8934	Hs.115325	NM_003929	protein-coding
1	23757007	23759783	ENSG00000011007	ENSG00000011007	ELOA	elongin A	0.08	+	23757007	23759783	0	2	118,272,	0,2504	-1.98	-2.52	-0.329	intron (NM_003198, intron 10 of 10)	AluSx3|SINE|Alu	15029	NM_003198	6924	Hs.15535	NM_003198	protein-coding
1	42459665	42460291	ENSG00000127125	ENSG00000186409	CCDC30	coiled-coil domain containing 30	6.8e-08	+	42459665	42460291	0	1	626,	0	-14.9	-16.5	-0.329	3' UTR (NM_001287506, exon 3 of 3)	3' UTR (NM_001287506, exon 3 of 3)	-3308	NM_001355224	728621	Hs.729640	NM_001080850	protein-coding
1	42746334	42746754	ENSG00000117385	ENSG00000164007	CLDN19	claudin 19	0.11	-	42746334	42746754	0	1	420,	0	-1.69	-2.17	-0.326	3' UTR (NM_001146289, exon 15 of 15)	3' UTR (NM_001146289, exon 15 of 15)	-6290	NM_001185117	149461	Hs.496270	NM_148960	protein-coding
1	52020152	52020390	ENSG00000285839	ENSG00000198841	KTI12	KTI12 chromatin associated homolog	0.015	-	52020152	52020390	0	1	238,	0	-3.48	-4.22	-0.325	3' UTR (NM_015913, exon 7 of 7)	3' UTR (NM_015913, exon 7 of 7)	13539	NM_138417	112970	Hs.476033	NM_138417	protein-coding
1	234607007	234609483	ENSG00000228830	ENSG00000168264	IRF2BP2	interferon regulatory factor 2 binding protein 2	4.8e-23	+	234607007	234609483	0	2	630,63,	0,2413	-48.9	-51.4	-0.324	intron (NM_001077397, intron 1 of 1)	intron (NM_001077397, intron 1 of 1)	1280	NM_182972	359948	Hs.350268	NM_182972	protein-coding
1	37997008	37997458	ENSG00000183386	ENSG00000183431	SF3A3	splicing factor 3a subunit 3	0.016	-	37997008	37997458	0	1	450,	0	-3.42	-4.16	-0.323	3' UTR (NM_001243878, exon 5 of 5)	3' UTR (NM_001243878, exon 5 of 5)	-7211	NM_001320830	10946	Hs.77897	NM_006802	protein-coding
1	153644371	153645528	ENSG00000160679	ENSG00000189171	S100A13	S100 calcium binding protein A13	0.0011	+	153644371	153645528	0	2	14,465,	0,692	-5.77	-6.77	-0.323	intron (NM_015607, intron 5 of 5)	intron (NM_015607, intron 5 of 5)	-10589	NM_001024210	6284	Hs.516505	NM_005979	protein-coding
1	145911527	145911735	ENSG00000131779	ENSG00000143127	ITGA10	integrin subunit alpha 10	0.12	-	145911527	145911735	0	1	208,	0	-1.67	-2.15	-0.321	non-coding (NR_073493, exon 4 of 4)	non-coding (NR_073493, exon 4 of 4)	-1442	NM_001303041	8515	Hs.158237	NM_003637	protein-coding
1	27408108	27408288	ENSG00000158195	ENSG00000181773	GPR3	G protein-coupled receptor 3	0.0025	-	27408108	27408288	0	1	180,	0	-5.07	-5.99	-0.316	exon (NM_006990, exon 9 of 9)	exon (NM_006990, exon 9 of 9)	15576	NM_005281	2827	Hs.66542	NM_005281	protein-coding
1	46034745	46036124	ENSG00000086015	ENSG00000117461	PIK3R3	phosphoinositide-3-kinase regulatory subunit 3	0.049	+	46034745	46036124	0	1	1379,	0	-2.41	-3.01	-0.314	exon (NM_015112, exon 29 of 29)	exon (NM_015112, exon 29 of 29)	95238	NM_001328651	8503	Hs.655387	NM_003629	protein-coding
1	51269992	51271493	ENSG00000123091	ENSG00000085831	TTC39A	tetratricopeptide repeat domain 39A	0.013	+	51269992	51271493	0	2	133,343,	0,1158	-3.58	-4.34	-0.312	intron (NM_014372, intron 2 of 2)	intron (NM_014372, intron 2 of 2)	27218	NM_001297666	22996	Hs.112949	NM_001080494	protein-coding
1	173800208	173806514	ENSG00000120334	ENSG00000120334	CENPL	centromere protein L	0.0024	-	173800208	173806514	0	3	311,543,76,	0,2754,6230	-5.1	-6.02	-0.311	exon (NM_001127181, exon 6 of 7)	exon (NM_001127181, exon 6 of 7)	20771	NM_001171182	91687	Hs.531856	NM_033319	protein-coding
1	12207076	12207614	ENSG00000028137	ENSG00000263676	MIR4632	microRNA 4632	0.078	+	12207076	12207614	0	1	538,	0	-2.01	-2.55	-0.309	3' UTR (NM_001066, exon 10 of 10)	3' UTR (NM_001066, exon 10 of 10)	15632	NR_039775	100616438		NR_039775	ncRNA
1	151759642	151760118	ENSG00000143436	ENSG00000143450	OAZ3	ornithine decarboxylase antizyme 3	0.00066	-	151759642	151760118	0	1	476,	0	-6.28	-7.32	-0.308	non-coding (NR_125331, exon 7 of 7)	non-coding (NR_125331, exon 7 of 7)	-3089	NM_001134939	51686	Hs.713789	NM_016178	protein-coding
1	203853502	203853952	ENSG00000257315	ENSG00000182004	SNRPE	small nuclear ribonucleoprotein polypeptide E	9.2e-05	+	203853502	203853952	0	1	450,	0	-8.09	-9.29	-0.308	3' UTR (NM_001350262, exon 20 of 20)	3' UTR (NM_001350262, exon 20 of 20)	-7872	NM_001304464	6635	Hs.334612	NM_003094	protein-coding
1	9729713	9730581	ENSG00000171603	ENSG00000171608	PIK3CD	phosphatidylinositol-4,5-bisphosphate 3-kinase catalytic subunit delta	0.0072	-	9729713	9730581	0	1	868,	0	-4.12	-4.94	-0.307	3' UTR (NM_001302883, exon 18 of 18)	3' UTR (NM_001302883, exon 18 of 18)	38680	NM_001350235	5293	Hs.518451	NM_005026	protein-coding
1	201465756	201466367	ENSG00000174307	ENSG00000174307	PHLDA3	pleckstrin homology like domain family A member 3	0.052	-	201465756	201466367	0	2	422,57,	0,554	-2.36	-2.95	-0.307	non-coding (NR_073080, exon 3 of 3)	non-coding (NR_073080, exon 3 of 3)	3109	NR_073080	23612	Hs.153944	NM_012396	protein-coding
1	203853500	203853980	ENSG00000058673	ENSG00000182004	SNRPE	small nuclear ribonucleoprotein polypeptide E	7.7e-05	+	203853500	203853980	0	1	480,	0	-8.26	-9.47	-0.307	3' UTR (NM_001350262, exon 20 of 20)	3' UTR (NM_001350262, exon 20 of 20)	-7859	NM_001304464	6635	Hs.334612	NM_003094	protein-coding
1	1672674	1674397	ENSG00000269737	ENSG00000248333	CDK11B	cyclin dependent kinase 11B	0.091	+	1672674	1674397	0	2	737,397,	0,1326	-1.88	-2.4	-0.303	intron (NM_001110781, intron 4 of 8)	AluSg|SINE|Alu	-14532	NM_033490	984	Hs.651228	NM_001787	protein-coding
1	224389430	224393908	ENSG00000162923	ENSG00000266618	MIR4742	microRNA 4742	2.5e-05	-	224389430	224393908	0	2	430,81,	0,4397	-9.35	-10.6	-0.303	intron (NM_025160, intron 13 of 13)	AluJo|SINE|Alu	6642	NR_039896	100616468		NR_039896	ncRNA
1	16458912	16460078	ENSG00000157191	ENSG00000226029	LINC01772	long intergenic non-protein coding RNA 1772	7.5e-06	+	16458912	16460078	0	1	1166,	0	-10.4	-11.8	-0.3	3' UTR (NM_001145278, exon 8 of 8)	3' UTR (NM_001145278, exon 8 of 8)	-1453	NR_147210	107984921	Hs.528312	NR_147210	ncRNA
1	156176824	156177752	ENSG00000196189	ENSG00000160785	SLC25A44	solute carrier family 25 member 44	0.015	+	156176824	156177752	0	1	928,	0	-3.43	-4.17	-0.3	3' UTR (NM_001193301, exon 15 of 15)	3' UTR (NM_001193301, exon 15 of 15)	-16644	NM_001286184	9673	Hs.532375	NM_014655	protein-coding
1	231366112	231367594	ENSG00000135766	ENSG00000010072	SPRTN	SprT-like N-terminal domain	0.03	-	231366112	231367594	0	2	363,26,	0,1456	-2.85	-3.51	-0.298	intron (NM_022051, intron 4 of 4)	intron (NM_022051, intron 4 of 4)	28560	NM_001010984	83932	Hs.554892	NM_032018	protein-coding
1	93154527	93156123	ENSG00000117500	ENSG00000117500	TMED5	transmembrane p24 trafficking protein 5	0.0014	-	93154527	93156123	0	2	361,88,	0,1508	-5.62	-6.59	-0.297	intron (NM_016040, intron 3 of 3)	intron (NM_016040, intron 3 of 3)	25088	NM_016040	50999	Hs.482873	NM_016040	protein-coding
1	180197383	180197564	ENSG00000116260	ENSG00000121454	LHX4	LIM homeobox 4	0.11	+	180197383	180197564	0	1	181,	0	-1.76	-2.25	-0.296	3' UTR (NM_001004128, exon 13 of 13)	3' UTR (NM_001004128, exon 13 of 13)	-32790	NM_033343	89884	Hs.658487	NM_033343	protein-coding
1	234374296	234384049	ENSG00000168275	ENSG00000168275	COA6	cytochrome c oxidase assembly factor 6	0.0089	+	234374296	234384049	0	2	93,327,	0,9426	-3.91	-4.72	-0.295	intron (NM_001206641, intron 2 of 2)	FRAM|SINE|Alu	5472	NM_001301733	388753	Hs.23198	NM_001012985	protein-coding
1	32775476	32776016	ENSG00000134684	ENSG00000162522	KIAA1522	KIAA1522	2.8e-08	-	32775476	32776016	0	1	540,	0	-15.8	-17.4	-0.293	TTS (NM_001198973)	TTS (NM_001198973)	10119	NM_001198972	57648	Hs.591502	NM_020888	protein-coding
1	88832929	88834276	ENSG00000065243	ENSG00000137947	GTF2B	general transcription factor IIB	0.0032	+	88832929	88834276	0	2	228,1032,	0,315	-4.84	-5.73	-0.292	3' UTR (NM_001320709, exon 22 of 22)	3' UTR (NM_001320709, exon 22 of 22)	57964	NM_001514	2959	Hs.481852	NM_001514	protein-coding
1	67687678	67688098	ENSG00000116717	ENSG00000116717	GADD45A	growth arrest and DNA damage inducible alpha	1.4e-05	+	67687678	67688098	0	1	420,	0	-9.86	-11.2	-0.291	3' UTR (NM_001199742, exon 3 of 3)	3' UTR (NM_001199742, exon 3 of 3)	2687	NM_001199742	1647	Hs.80409	NM_001924	protein-coding
1	51878013	51878637	ENSG00000078618	ENSG00000078618	NRDC	nardilysin convertase	0.053	-	51878013	51878637	0	2	27,363,	0,261	-2.34	-2.93	-0.289	promoter-TSS (NM_001242361)	promoter-TSS (NM_001242361)	-285	NM_001242361	4898	Hs.584782	NM_002525	protein-coding
1	54226118	54226716	ENSG00000157216	ENSG00000198711	SSBP3-AS1	SSBP3 antisense RNA 1	0.085	-	54226118	54226716	0	1	598,	0	-1.94	-2.46	-0.288	TTS (NM_001330602)	TTS (NM_001330602)	-10026	NR_103541	619518	Hs.591438	NM_001034847	ncRNA
1	36092464	36093872	ENSG00000116863	ENSG00000116863	ADPRHL2	ADP-ribosylhydrolase like 2	0.019	+	36092464	36093872	0	2	58,776,	0,632	-3.25	-3.96	-0.286	exon (NM_017825, exon 6 of 6)	exon (NM_017825, exon 6 of 6)	4276	NM_017825	54936	Hs.18021	NM_017825	protein-coding
1	11054583	11054762	ENSG00000116649	ENSG00000116649	SRM	spermidine synthase	0.065	-	11054583	11054762	0	1	179,	0	-2.17	-2.73	-0.285	TTS (NM_003132)	TTS (NM_003132)	5345	NM_003132	6723	Hs.76244	NM_003132	protein-coding
1	65432266	65432506	ENSG00000213625	ENSG00000213625	LEPROT	leptin receptor overlapping transcript	0.17	+	65432266	65432506	0	1	240,	0	-1.38	-1.8	-0.285	3' UTR (NM_001198681, exon 5 of 5)	3' UTR (NM_001198681, exon 5 of 5)	11670	NM_001198681	54741	Hs.23581	NM_017526	protein-coding
1	168045036	168050910	ENSG00000143164	ENSG00000221545	MIR1255B2	microRNA 1255b-2	0.094	+	168045036	168050910	0	2	191,19,	0,5855	-1.85	-2.36	-0.284	intron (NM_001017977, intron 14 of 18)	intron (NM_001017977, intron 14 of 18)	49313	NR_031702	100313835		NR_031702	ncRNA
1	236542680	236543400	ENSG00000116977	ENSG00000223776	LGALS8-AS1	LGALS8 antisense RNA 1	0.17	+	236542680	236543400	0	1	720,	0	-1.34	-1.75	-0.284	exon (NM_006499, exon 9 of 12)	exon (NM_006499, exon 9 of 12)	-18532	NR_034040	100287902	Hs.677376	NR_034040	ncRNA
1	12208540	12209228	ENSG00000028137	ENSG00000263676	MIR4632	microRNA 4632	0.0027	+	12208540	12209228	0	1	688,	0	-5	-5.91	-0.281	3' UTR (NM_001066, exon 10 of 10)	3' UTR (NM_001066, exon 10 of 10)	17171	NR_039775	100616438		NR_039775	ncRNA
1	46413549	46413848	ENSG00000117480	ENSG00000117480	FAAH	fatty acid amide hydrolase	0.12	+	46413549	46413848	0	1	299,	0	-1.63	-2.1	-0.281	3' UTR (NM_001441, exon 15 of 15)	3' UTR (NM_001441, exon 15 of 15)	19382	NM_001441	2166	Hs.720143	NM_001441	protein-coding
1	39331858	39333419	ENSG00000127603	ENSG00000127603	KIAA0754	KIAA0754	0.013	+	39331858	39333419	0	1	1561,	0	-3.62	-4.38	-0.277	intron (NM_012090, intron 35 of 92)	intron (NM_012090, intron 35 of 92)	-76434	NM_015038	643314	Hs.658760	NM_015038	protein-coding
1	111117870	111118199	ENSG00000156171	ENSG00000134255	CEPT1	choline/ethanolamine phosphotransferase 1	0.00013	-	111117870	111118199	0	1	329,	0	-7.79	-8.96	-0.277	non-coding (NR_146301, exon 9 of 9)	non-coding (NR_146301, exon 9 of 9)	-21348	NM_001007794	10390	Hs.363572	NM_006090	protein-coding
1	206454115	206454715	ENSG00000266028	ENSG00000263528	IKBKE	inhibitor of nuclear factor kappa B kinase subunit epsilon	0.038	+	206454115	206454715	0	1	600,	0	-2.62	-3.26	-0.277	3' UTR (NM_001300952, exon 20 of 20)	3' UTR (NM_001300952, exon 20 of 20)	-16061	NM_001193321	9641	Hs.321045	NM_014002	protein-coding
1	36455717	36456247	ENSG00000116898	ENSG00000116885	OSCP1	organic solute carrier partner 1	0.0034	-	36455717	36456247	0	2	208,61,	0,469	-4.79	-5.69	-0.276	intron (NM_031280, intron 7 of 7)	intron (NM_031280, intron 7 of 7)	-5497	NM_001330493	127700	Hs.202207	NM_145047	protein-coding
1	110899150	110899808	ENSG00000143119	ENSG00000143119	CD53	CD53 molecule	6.8e-07	+	110899150	110899808	0	1	658,	0	-12.7	-14.2	-0.275	3' UTR (NM_001320638, exon 6 of 6)	3' UTR (NM_001320638, exon 6 of 6)	26331	NM_000560	963	Hs.443057	NM_000560	protein-coding
1	160030702	160031781	ENSG00000143315	ENSG00000143315	PIGM	phosphatidylinositol glycan anchor biosynthesis class M	0.17	-	160030702	160031781	0	1	1079,	0	-1.35	-1.77	-0.275	exon (NM_145167, exon 1 of 1)	exon (NM_145167, exon 1 of 1)	748	NM_145167	93183	Hs.552810	NM_145167	protein-coding
1	154600925	154602571	ENSG00000160710	ENSG00000160710	ADAR	adenosine deaminase RNA specific	1.5e-08	-	154600925	154602571	0	1	1646,	0	-16.3	-18	-0.273	exon (NM_001193495, exon 2 of 15)	exon (NM_001193495, exon 2 of 15)	4505	NM_001193495	103	Hs.12341	NM_001111	protein-coding
1	167541590	167541770	ENSG00000143162	ENSG00000143162	CREG1	cellular repressor of E1A stimulated genes 1	0.024	-	167541590	167541770	0	1	180,	0	-3.05	-3.74	-0.273	3' UTR (NM_003851, exon 4 of 4)	3' UTR (NM_003851, exon 4 of 4)	12082	NM_003851	8804	Hs.5710	NM_003851	protein-coding
1	1541672	1542063	ENSG00000160075	ENSG00000205090	TMEM240	transmembrane protein 240	0.029	-	1541672	1542063	0	1	391,	0	-2.88	-3.55	-0.271	3' UTR (NM_014188, exon 5 of 5)	3' UTR (NM_014188, exon 5 of 5)	-1244	NM_001114748	339453	Hs.668654	NM_001114748	protein-coding
1	226146347	226159187	ENSG00000182827	ENSG00000234478	ACBD3-AS1	ACBD3 antisense RNA 1	0.0011	-	226146347	226159187	0	4	474,285,192,4,	0,5987,8294,12836	-5.81	-6.8	-0.271	intron (NM_022735, intron 6 of 7)	intron (NM_022735, intron 6 of 7)	4764	NR_146443	107985353	Hs.735455	NR_146443	ncRNA
1	55068574	55071310	ENSG00000162402	ENSG00000169174	PCSK9	proprotein convertase subtilisin/kexin type 9	0.04	-	55068574	55071310	0	2	533,38,	0,2698	-2.6	-3.23	-0.268	intron (NM_015306, intron 67 of 67)	intron (NM_015306, intron 67 of 67)	29720	NR_110451	255738	Hs.18844	NM_174936	protein-coding
1	32102475	32102836	ENSG00000121775	ENSG00000025800	KPNA6	karyopherin subunit alpha 6	0.057	+	32102475	32102836	0	1	361,	0	-2.28	-2.86	-0.267	exon (NM_001319677, exon 9 of 9)	exon (NM_001319677, exon 9 of 9)	-5400	NM_012316	23633	Hs.470588	NM_012316	protein-coding
1	46285455	46285996	ENSG00000132128	ENSG00000132128	LRRC41	leucine rich repeat containing 41	0.11	-	46285455	46285996	0	1	541,	0	-1.71	-2.19	-0.266	exon (NM_006369, exon 4 of 10)	exon (NM_006369, exon 4 of 10)	17640	NM_006369	10489	Hs.144941	NM_006369	protein-coding
1	230997258	231000595	ENSG00000173409	ENSG00000173409	ARV1	ARV1 homolog, fatty acid homeostasis modulator	0.012	+	230997258	231000595	0	3	9,245,458,	0,2364,2879	-3.64	-4.41	-0.264	intron (NM_022786, intron 5 of 5)	intron (NM_022786, intron 5 of 5)	19833	NR_144538	64801	Hs.275736	NM_022786	protein-coding
1	247418638	247419058	ENSG00000162711	ENSG00000162711	NLRP3	NLR family pyrin domain containing 3	0.063	+	247418638	247419058	0	1	420,	0	-2.2	-2.77	-0.264	exon (NM_183395, exon 1 of 7)	exon (NM_183395, exon 1 of 7)	799	NM_001243133	114548	Hs.159483	NM_004895	protein-coding
1	117958974	117959683	ENSG00000065183	ENSG00000065183	WDR3	WD repeat domain 3	0.15	+	117958974	117959683	0	2	29,392,	0,317	-1.47	-1.9	-0.263	exon (NM_006784, exon 27 of 27)	exon (NM_006784, exon 27 of 27)	29590	NM_006784	10885	Hs.310809	NM_006784	protein-coding
1	89934274	89935922	ENSG00000171492		GEMIN8P4	gem nuclear organelle associated protein 8 pseudogene 4	6.2e-10	+	89934274	89935922	0	1	1648,	0	-19.3	-21.2	-0.262	exon (NM_018103, exon 3 of 3)	exon (NM_018103, exon 3 of 3)	59868	NR_002830	492303	Hs.550796	NR_002830	pseudo
1	92390308	92391837	ENSG00000122484	ENSG00000122484	RPAP2	RNA polymerase II associated protein 2	0.18	+	92390308	92391837	0	1	1529,	0	-1.33	-1.74	-0.259	3' UTR (NM_024813, exon 13 of 13)	3' UTR (NM_024813, exon 13 of 13)	92014	NM_024813	79871	Hs.444421	NM_024813	protein-coding
1	149926389	149927205	ENSG00000143368	ENSG00000143368	SF3B4	splicing factor 3b subunit 4	0.0018	-	149926389	149927205	0	2	529,40,	0,776	-5.36	-6.31	-0.259	exon (NM_005850, exon 3 of 6)	exon (NM_005850, exon 3 of 6)	1006	NM_005850	10262	Hs.516160	NM_005850	protein-coding
1	26574223	26574731	ENSG00000117676	ENSG00000238705	MIR1976	microRNA 1976	8.6e-05	+	26574223	26574731	0	1	508,	0	-8.16	-9.36	-0.258	3' UTR (NM_001330441, exon 21 of 21)	3' UTR (NM_001330441, exon 21 of 21)	19935	NR_031740	100302190		NR_031740	ncRNA
1	202880755	202889015	ENSG00000183155	ENSG00000183155	RABIF	RAB interacting factor	0.11	-	202880755	202889015	0	2	468,43,	0,8217	-1.75	-2.24	-0.258	intron (NM_002871, intron 1 of 1)	AluSx1|SINE|Alu	4264	NM_002871	5877	Hs.90875	NM_002871	protein-coding
1	151033837	151034999	ENSG00000143363	ENSG00000163141	BNIPL	BCL2 interacting protein like	0.17	+	151033837	151034999	0	1	1162,	0	-1.36	-1.78	-0.257	non-coding (NR_130135, exon 5 of 5)	non-coding (NR_130135, exon 5 of 5)	-2168	NM_138278	149428	Hs.591473	NM_138278	protein-coding
1	243176789	243199063	ENSG00000143702	ENSG00000143702	CEP170	centrosomal protein 170	0.0038	-	243176789	243199063	0	4	27,721,477,4,	0,8989,14228,22270	-4.68	-5.56	-0.257	intron (NM_014812, intron 8 of 19)	intron (NM_014812, intron 8 of 19)	67355	NM_014812	9859	Hs.533635	NM_014812	protein-coding
1	26280985	26281344	ENSG00000142669	ENSG00000142669	SH3BGRL3	SH3 domain binding glutamate rich protein like 3	2.5e-08	+	26280985	26281344	0	1	359,	0	-15.9	-17.5	-0.256	3' UTR (NM_031286, exon 3 of 3)	3' UTR (NM_031286, exon 3 of 3)	1079	NM_031286	83442	Hs.109051	NM_031286	protein-coding
1	32170848	32176510	ENSG00000250135	ENSG00000084652	TXLNA	taxilin alpha	0.11	+	32170848	32176510	0	2	358,135,	0,5527	-1.75	-2.24	-0.256	3' UTR (NM_012316, exon 14 of 14)	3' UTR (NM_012316, exon 14 of 14)	-5996	NM_175852	200081	Hs.17987	NM_175852	protein-coding
1	36286481	36286902	ENSG00000054118	ENSG00000214193	SH3D21	SH3 domain containing 21	0.0063	+	36286481	36286902	0	1	421,	0	-4.22	-5.06	-0.255	exon (NM_005119, exon 4 of 12)	exon (NM_005119, exon 4 of 12)	-19676	NM_001162530	79729	Hs.524496	NM_024676	protein-coding
1	154957865	154959785	ENSG00000163348		LOC101928120	uncharacterized LOC101928120	0.0086	-	154957865	154959785	0	1	1920,	0	-3.96	-4.76	-0.254	exon (NM_138300, exon 3 of 3)	exon (NM_138300, exon 3 of 3)	-2646	NM_001321726	101928120	Hs.533597	NM_001321726	protein-coding
1	7984965	7985086	ENSG00000116288	ENSG00000116288	PARK7	Parkinsonism associated deglycase	0.095	+	7984965	7985086	0	1	121,	0	-1.84	-2.35	-0.252	exon (NM_007262, exon 7 of 7)	exon (NM_007262, exon 7 of 7)	23315	NM_007262	11315	Hs.419640	NM_007262	protein-coding
1	50970221	50974274	ENSG00000123080	ENSG00000123080	CDKN2C	cyclin dependent kinase inhibitor 2C	3e-05	+	50970221	50974274	0	2	276,382,	0,3671	-9.08	-10.4	-0.252	intron (NM_078626, intron 1 of 1)	intron (NM_078626, intron 1 of 1)	2003	NM_078626	1031	Hs.525324	NM_001262	protein-coding
1	161122012	161123038	ENSG00000158796	ENSG00000158793	NIT1	nitrilase 1	0.018	-	161122012	161123038	0	2	511,54,	0,972	-3.27	-3.99	-0.251	intron (NM_001039711, intron 4 of 4)	intron (NM_001039711, intron 4 of 4)	4407	NM_001185094	4817	Hs.146406	NM_005600	protein-coding
1	215619219	215620762	ENSG00000136636	ENSG00000136636	KCTD3	potassium channel tetramerization domain containing 3	0.011	+	215619219	215620762	0	2	72,706,	0,837	-3.76	-4.55	-0.251	intron (NM_001319294, intron 17 of 17)	intron (NM_001319294, intron 17 of 17)	52687	NM_001319294	51133	Hs.335139	NM_016121	protein-coding
1	22526212	22527352	ENSG00000184677	ENSG00000070886	EPHA8	EPH receptor A8	0.13	+	22526212	22527352	0	1	1140,	0	-1.57	-2.02	-0.25	3' UTR (NM_001330398, exon 16 of 16)	3' UTR (NM_001330398, exon 16 of 16)	-36707	NM_020526	2046	Hs.283613	NM_020526	protein-coding
1	109237779	109238169	ENSG00000031698	ENSG00000143126	CELSR2	cadherin EGF LAG seven-pass G-type receptor 2	0.00019	+	109237779	109238169	0	1	390,	0	-7.43	-8.57	-0.25	3' UTR (NM_001330669, exon 12 of 12)	3' UTR (NM_001330669, exon 12 of 12)	-11565	NM_001408	1952	Hs.57652	NM_001408	protein-coding
1	161047844	161048144	ENSG00000186517	ENSG00000158773	USF1	upstream transcription factor 1	0.11	-	161047844	161048144	0	1	300,	0	-1.74	-2.23	-0.249	exon (NM_181720, exon 13 of 13)	exon (NM_181720, exon 13 of 13)	-2017	NM_207005	7391	Hs.414880	NM_007122	protein-coding
1	202147012	202148542	ENSG00000143851	ENSG00000143862	ARL8A	ADP ribosylation factor like GTPase 8A	2.3e-10	-	202147012	202148542	0	1	1530,	0	-20.4	-22.2	-0.249	non-coding (NR_037663, exon 10 of 10)	non-coding (NR_037663, exon 10 of 10)	-3034	NM_001256129	127829	Hs.497399	NM_138795	protein-coding
1	203852211	203852811	ENSG00000058673	ENSG00000182004	SNRPE	small nuclear ribonucleoprotein polypeptide E	0.0029	+	203852211	203852811	0	1	600,	0	-4.94	-5.84	-0.248	3' UTR (NM_001350262, exon 20 of 20)	3' UTR (NM_001350262, exon 20 of 20)	-9088	NM_001304464	6635	Hs.334612	NM_003094	protein-coding
1	28538432	28538762	ENSG00000180198	ENSG00000180098	TRNAU1AP	tRNA selenocysteine 1 associated protein 1	0.0011	+	28538432	28538762	0	1	330,	0	-5.81	-6.8	-0.246	non-coding (NR_030725, exon 13 of 13)	non-coding (NR_030725, exon 13 of 13)	-14420	NR_003109	54952	Hs.533626	NM_017846	protein-coding
1	62437342	62441489	ENSG00000162607	ENSG00000162607	USP1	ubiquitin specific peptidase 1	0.11	+	62437342	62441489	0	3	58,239,2,	0,2456,4145	-1.76	-2.25	-0.246	intron (NM_003368, intron 1 of 8)	AluSg|SINE|Alu	2367	NM_003368	7398	Hs.35086	NM_003368	protein-coding
1	15734051	15734441	ENSG00000116786	ENSG00000162461	SLC25A34	solute carrier family 25 member 34	0.021	+	15734051	15734441	0	1	390,	0	-3.14	-3.84	-0.245	3' UTR (NM_015164, exon 20 of 20)	3' UTR (NM_015164, exon 20 of 20)	-2012	NM_207348	284723	Hs.631867	NM_207348	protein-coding
1	203852185	203852814	ENSG00000257315	ENSG00000182004	SNRPE	small nuclear ribonucleoprotein polypeptide E	0.002	+	203852185	203852814	0	1	629,	0	-5.26	-6.19	-0.245	3' UTR (NM_001350262, exon 20 of 20)	3' UTR (NM_001350262, exon 20 of 20)	-9099	NM_001304464	6635	Hs.334612	NM_003094	protein-coding
1	32936684	32938402	ENSG00000116514	ENSG00000116514	RNF19B	ring finger protein 19B	0.027	-	32936684	32938402	0	2	625,6,	0,1712	-2.94	-3.62	-0.244	intron (NM_001127361, intron 8 of 8)	AluJr|SINE|Alu	27266	NM_001127361	127544	Hs.591504	NM_153341	protein-coding
1	151286371	151288348	ENSG00000143373	ENSG00000143373	ZNF687	zinc finger protein 687	0.016	+	151286371	151288348	0	1	1977,	0	-3.41	-4.14	-0.243	exon (NM_001304763, exon 3 of 10)	exon (NM_001304763, exon 3 of 10)	5061	NM_020832	57592	Hs.186756	NM_020832	protein-coding
1	1664941	1665871	ENSG00000189339	ENSG00000248333	CDK11B	cyclin dependent kinase 11B	0.055	-	1664941	1665871	0	1	930,	0	-2.32	-2.9	-0.242	3' UTR (NM_001290264, exon 10 of 10)	3' UTR (NM_001290264, exon 10 of 10)	-6402	NM_033490	984	Hs.651228	NM_001787	protein-coding
1	28281984	28282223	ENSG00000130766	ENSG00000130766	SESN2	sestrin 2	0.17	+	28281984	28282223	0	1	239,	0	-1.38	-1.79	-0.237	3' UTR (NM_031459, exon 10 of 10)	3' UTR (NM_031459, exon 10 of 10)	22586	NM_031459	83667	Hs.469543	NM_031459	protein-coding
1	231335511	231337312	ENSG00000116903	ENSG00000116903	EXOC8	exocyst complex component 8	0.039	-	231335511	231337312	0	1	1801,	0	-2.61	-3.24	-0.236	exon (NM_175876, exon 1 of 1)	exon (NM_175876, exon 1 of 1)	1440	NM_175876	149371	Hs.356198	NM_175876	protein-coding
1	201965455	201969976	ENSG00000134375	ENSG00000206637	SNORA70H	small nucleolar RNA, H/ACA box 70H	9.8e-05	+	201965455	201969976	0	2	88,508,	0,4013	-8.03	-9.23	-0.234	intron (NM_006335, intron 5 of 5)	AluJb|SINE|Alu	-10745	NR_145769	109616993		NR_145769	snoRNA
1	13780715	13786972	ENSG00000116731	ENSG00000116731	PRDM2	PR/SET domain 2	0.0022	+	13780715	13786972	0	2	2116,458,	0,5799	-5.18	-6.12	-0.233	intron (NM_012231, intron 8 of 9)	intron (NM_012231, intron 8 of 9)	34429	NM_001007257	7799	Hs.371823	NM_012231	protein-coding
1	204546856	204550112	ENSG00000198625	ENSG00000198625	MDM4	MDM4 regulator of p53	8.7e-05	+	204546856	204550112	0	2	21,1000,	0,2256	-8.15	-9.35	-0.232	intron (NM_001278517, intron 7 of 7)	intron (NM_001278517, intron 7 of 7)	32078	NM_002393	4194	Hs.497492	NM_002393	protein-coding
1	10419634	10419964	ENSG00000142657	ENSG00000251503	CENPS-CORT	CENPS-CORT readthrough	0.00058	+	10419634	10419964	0	1	330,	0	-6.4	-7.45	-0.229	3' UTR (NM_001304452, exon 13 of 13)	3' UTR (NM_001304452, exon 13 of 13)	-10634	NM_199006	100526739	Hs.412311	NM_198544	protein-coding
1	156265925	156266346	ENSG00000198952	ENSG00000198952	SMG5	SMG5 nonsense mediated mRNA decay factor	0.035	-	156265925	156266346	0	1	421,	0	-2.71	-3.36	-0.229	exon (NM_001323614, exon 12 of 21)	exon (NM_001323614, exon 12 of 21)	16689	NM_015327	23381	Hs.516837	NM_015327	protein-coding
1	179845539	179846678	ENSG00000169905	ENSG00000169905	TOR1AIP2	torsin 1A interacting protein 2	0.093	-	179845539	179846678	0	1	1139,	0	-1.86	-2.38	-0.229	exon (NM_001349935, exon 8 of 8)	exon (NM_001349935, exon 8 of 8)	22731	NM_001349933	163590	Hs.571797	NM_022347	protein-coding
1	11022801	11023071	ENSG00000120948	ENSG00000120948	TARDBP	TAR DNA binding protein	0.01	+	11022801	11023071	0	1	270,	0	-3.82	-4.61	-0.227	3' UTR (NM_007375, exon 6 of 6)	3' UTR (NM_007375, exon 6 of 6)	10314	NM_007375	23435	Hs.300624	NM_007375	protein-coding
1	145978338	145978848	ENSG00000121851	ENSG00000121851	POLR3GL	RNA polymerase III subunit G like	0.16	+	145978338	145978848	0	1	510,	0	-1.43	-1.86	-0.227	3' UTR (NM_001330685, exon 7 of 7)	3' UTR (NM_001330685, exon 7 of 7)	13903	NM_032305	84265	Hs.591456	NM_032305	protein-coding
1	234606928	234608067	ENSG00000168264	ENSG00000168264	IRF2BP2	interferon regulatory factor 2 binding protein 2	2.6e-18	-	234606928	234608067	0	2	924,34,	0,1105	-38.1	-40.5	-0.227	exon (NM_182972, exon 2 of 2)	exon (NM_182972, exon 2 of 2)	2027	NM_182972	359948	Hs.350268	NM_182972	protein-coding
1	35753848	35762455	ENSG00000092853	ENSG00000092853	CLSPN	claspin	0.021	-	35753848	35762455	0	5	88,575,109,73,52,	0,6493,7247,8149,8555	-3.18	-3.88	-0.226	intron (NM_001330490, intron 8 of 24)	intron (NM_001330490, intron 8 of 24)	11826	NM_001330490	63967	Hs.175613	NM_022111	protein-coding
1	35763282	35765238	ENSG00000092853	ENSG00000092853	CLSPN	claspin	0.018	-	35763282	35765238	0	3	39,449,21,	0,983,1935	-3.27	-3.99	-0.225	intron (NM_001190481, intron 3 of 23)	intron (NM_001190481, intron 3 of 23)	5718	NM_001330490	63967	Hs.175613	NM_022111	protein-coding
1	1401907	1402238	ENSG00000242485	ENSG00000224870	MRPL20-AS1	MRPL20 antisense RNA 1	0.11	-	1401907	1402238	0	1	331,	0	-1.71	-2.2	-0.222	TTS (NR_015434)	TTS (NR_015434)	2543	NR_015434	148413	Hs.741357	NR_015434	ncRNA
1	156009047	156010247	ENSG00000163479	ENSG00000163479	SSR2	signal sequence receptor subunit 2	1.7e-09	-	156009047	156010247	0	2	603,27,	0,1173	-18.5	-20.2	-0.222	exon (NM_003145, exon 6 of 6)	exon (NM_003145, exon 6 of 6)	11304	NM_003145	6746	Hs.74564	NM_003145	protein-coding
1	11923460	11925474	ENSG00000116685	ENSG00000116685	KIAA2013	KIAA2013	0.13	-	11923460	11925474	0	2	29,270,	0,1744	-1.59	-2.05	-0.221	intron (NM_138346, intron 1 of 2)	L2a|LINE|L2	1960	NM_138346	90231	Hs.520094	NM_138346	protein-coding
1	46360820	46362340	ENSG00000117481	ENSG00000117481	NSUN4	NOP2/Sun RNA methyltransferase 4	0.067	+	46360820	46362340	0	2	8,771,	0,749	-2.14	-2.7	-0.221	non-coding (NR_045789, exon 7 of 7)	non-coding (NR_045789, exon 7 of 7)	20402	NM_001256128	387338	Hs.163424	NM_199044	protein-coding
1	119916135	119916646	ENSG00000134250	ENSG00000134249	ADAM30	ADAM metallopeptidase domain 30	0.16	-	119916135	119916646	0	1	511,	0	-1.4	-1.82	-0.22	exon (NM_024408, exon 34 of 34)	exon (NM_024408, exon 34 of 34)	-19876	NM_021794	11085	Hs.283011	NM_021794	protein-coding
1	247189850	247199398	ENSG00000227671	ENSG00000283881	MIR3916	microRNA 3916	5.6e-07	-	247189850	247199398	0	2	1162,38,	0,9510	-12.9	-14.4	-0.22	Intergenic	L1MB2|LINE|L1	7436	NR_037480	100500849		NR_037480	ncRNA
1	154584598	154585251	ENSG00000160710	ENSG00000160716	CHRNB2	cholinergic receptor nicotinic beta 2 subunit	0.026	-	154584598	154585251	0	2	445,35,	0,618	-2.98	-3.66	-0.219	exon (NM_001193495, exon 15 of 15)	exon (NM_001193495, exon 15 of 15)	17147	NM_000748	1141	Hs.2306	NM_000748	protein-coding
1	52389251	52396300	ENSG00000085840	ENSG00000085840	ORC1	origin recognition complex subunit 1	0.0059	-	52389251	52396300	0	3	70,361,255,	0,4191,6794	-4.3	-5.14	-0.217	intron (NM_001190818, intron 6 of 16)	L1PB2|LINE|L1	11647	NM_004153	4998	Hs.17908	NM_004153	protein-coding
1	35855527	35856335	ENSG00000134698	ENSG00000092847	AGO1	argonaute RISC component 1	0.053	+	35855527	35856335	0	1	808,	0	-2.34	-2.93	-0.214	non-coding (NR_146062, exon 20 of 20)	non-coding (NR_146062, exon 20 of 20)	-13877	NM_001317123	26523	Hs.22867	NM_012199	protein-coding
1	183545214	183546257	ENSG00000116698	ENSG00000116701	NCF2	neutrophil cytosolic factor 2	0.083	+	183545214	183546257	0	2	98,292,	0,751	-1.96	-2.49	-0.214	intron (NM_001331007, intron 17 of 23)	intron (NM_001331007, intron 17 of 23)	44868	NM_001190794	4688	Hs.587558	NM_000433	protein-coding
1	156239651	156239982	ENSG00000160783	ENSG00000242252	BGLAP	bone gamma-carboxyglutamate protein	0.099	+	156239651	156239982	0	1	331,	0	-1.81	-2.31	-0.212	3' UTR (NM_001199653, exon 5 of 5)	3' UTR (NM_001199653, exon 5 of 5)	-2367	NM_199173	632	Hs.654541	NM_199173	protein-coding
1	89714314	89715154	ENSG00000171488	ENSG00000171488	LRRC8C	leucine rich repeat containing 8 VRAC subunit C	0.0011	+	89714314	89715154	0	1	840,	0	-5.77	-6.77	-0.202	exon (NM_032270, exon 3 of 3)	exon (NM_032270, exon 3 of 3)	81614	NM_032270	84230	Hs.412836	NM_032270	protein-coding
1	110945137	110952758	ENSG00000232811	ENSG00000121931	LRIF1	ligand dependent nuclear receptor interacting factor 1	0.18	+	110945137	110952758	0	2	23,575,	0,7046	-1.34	-1.74	-0.2	intron (NM_018372, intron 3 of 3)	L1ME4c|LINE|L1	14974	NM_018372	55791	Hs.25245	NM_018372	protein-coding
1	15725452	15728271	ENSG00000116786	ENSG00000162461	SLC25A34	solute carrier family 25 member 34	0.036	+	15725452	15728271	0	4	93,819,70,5,	0,1561,2626,2814	-2.68	-3.32	-0.199	intron (NM_015164, intron 8 of 19)	intron (NM_015164, intron 8 of 19)	-9396	NM_207348	284723	Hs.631867	NM_207348	protein-coding
1	16395040	16395459	ENSG00000055070	ENSG00000055070	SZRD1	SUZ RNA binding domain containing 1	0.035	+	16395040	16395459	0	1	419,	0	-2.71	-3.36	-0.197	TTS (NR_148413)	TTS (NR_148413)	28008	NR_073501	26099	Hs.252967	NM_001114600	protein-coding
1	156768186	156787107	ENSG00000143294	ENSG00000143294	PRCC	proline rich mitotic checkpoint control factor	0.024	+	156768186	156787107	0	3	53,48,500,	0,14095,18421	-3.03	-3.72	-0.197	intron (NM_005973, intron 1 of 6)	intron (NM_005973, intron 1 of 6)	10112	NM_005973	5546	Hs.516948	NM_005973	protein-coding
1	93876378	93877487	ENSG00000067334	ENSG00000067334	DNTTIP2	deoxynucleotidyltransferase terminal interacting protein 2	0.0066	-	93876378	93877487	0	1	1109,	0	-4.19	-5.02	-0.195	exon (NM_014597, exon 2 of 7)	exon (NM_014597, exon 2 of 7)	2273	NM_014597	30836	Hs.85769	NM_014597	protein-coding
1	150266386	150266985	ENSG00000117362	ENSG00000117362	APH1A	aph-1 homolog A, gamma-secretase subunit	0.11	-	150266386	150266985	0	2	270,30,	0,569	-1.7	-2.18	-0.194	intron (NM_001077628, intron 5 of 6)	intron (NM_001077628, intron 5 of 6)	2330	NM_001077628	51107	Hs.108408	NM_016022	protein-coding
1	155014680	155016909	ENSG00000160685	ENSG00000160685	ZBTB7B	zinc finger and BTB domain containing 7B	0.073	+	155014680	155016909	0	2	1134,690,	0,1539	-2.07	-2.62	-0.194	exon (NM_001256455, exon 2 of 3)	exon (NM_001256455, exon 2 of 3)	13165	NR_049765	51043	Hs.729279	NM_001252406	protein-coding
1	15922302	15929182	ENSG00000065526	ENSG00000116809	ZBTB17	zinc finger and BTB domain containing 17	0.0048	+	15922302	15929182	0	2	47,1092,	0,5788	-4.47	-5.33	-0.193	intron (NM_015001, intron 10 of 14)	intron (NM_015001, intron 10 of 14)	50390	NM_001287604	7709	Hs.433764	NM_003443	protein-coding
1	100990252	100992678	ENSG00000117543	ENSG00000117543	DPH5	diphthamide biosynthesis 5	0.17	-	100990252	100992678	0	2	379,42,	0,2384	-1.38	-1.8	-0.193	intron (NM_001077394, intron 7 of 7)	intron (NM_001077394, intron 7 of 7)	34319	NM_015958	51611	Hs.440776	NM_015958	protein-coding
1	179992157	180003177	ENSG00000135837	ENSG00000135837	CEP350	centrosomal protein 350	0.052	+	179992157	180003177	0	3	64,623,4,	0,4395,11016	-2.36	-2.95	-0.193	intron (NM_014810, intron 6 of 37)	MER5A|DNA|hAT-Charlie	42857	NM_014810	9857	Hs.413045	NM_014810	protein-coding
1	180975949	180984730	ENSG00000135823	ENSG00000232586	KIAA1614-AS1	KIAA1614 antisense RNA 1	0.07	-	180975949	180984730	0	2	697,54,	0,8727	-2.1	-2.66	-0.184	intron (NM_005819, intron 7 of 7)	L1MC1|LINE|L1	-25453	NR_145481	103344928	Hs.665319	NR_145481	ncRNA
1	39333628	39335099	ENSG00000127603	ENSG00000127603	KIAA0754	KIAA0754	0.073	+	39333628	39335099	0	1	1471,	0	-2.07	-2.62	-0.18	intron (NM_012090, intron 35 of 92)	intron (NM_012090, intron 35 of 92)	-74709	NM_015038	643314	Hs.658760	NM_015038	protein-coding
1	110947812	110949952	ENSG00000121931	ENSG00000121931	LRIF1	ligand dependent nuclear receptor interacting factor 1	0.019	-	110947812	110949952	0	2	587,102,	0,2038	-3.22	-3.94	-0.18	intron (NM_018372, intron 3 of 3)	intron (NM_018372, intron 3 of 3)	15040	NM_018372	55791	Hs.25245	NM_018372	protein-coding
1	154172049	154172260	ENSG00000143549	ENSG00000143549	TPM3	tropomyosin 3	0.15	-	154172049	154172260	0	1	211,	0	-1.44	-1.87	-0.18	intron (NM_001043352, intron 4 of 7)	intron (NM_001043352, intron 4 of 7)	6049	NM_001278191	7170	Hs.535581	NM_152263	protein-coding
1	52516023	52526372	ENSG00000134744	ENSG00000134744	TUT4	terminal uridylyl transferase 4	0.053	-	52516023	52526372	0	2	31,810,	0,9539	-2.35	-2.94	-0.177	intron (NM_001009881, intron 2 of 29)	L2a|LINE|L2	31892	NM_015269	23318	Hs.655407	NM_015269	protein-coding
1	149790278	149791799	ENSG00000150337	ENSG00000150337	FCGR1A	Fc fragment of IgG receptor Ia	0.16	+	149790278	149791799	0	3	60,38,563,	0,89,958	-1.41	-1.84	-0.175	intron (NM_000566, intron 5 of 5)	intron (NM_000566, intron 5 of 5)	8345	NM_000566	2209	Hs.77424	NM_000566	protein-coding
1	151159071	151159749	ENSG00000163154	ENSG00000163156	TNFAIP8L2-SCNM1	TNFAIP8L2-SCNM1 readthrough	0.068	+	151159071	151159749	0	1	678,	0	-2.13	-2.69	-0.175	TTS (NM_001136543)	TTS (NM_001136543)	2761	NM_001204848	100534012	Hs.732060	NM_001204848	protein-coding
1	151759611	151759911	ENSG00000269621	ENSG00000143450	OAZ3	ornithine decarboxylase antizyme 3	0.14	+	151759611	151759911	0	1	300,	0	-1.52	-1.97	-0.175	non-coding (NR_125331, exon 7 of 7)	non-coding (NR_125331, exon 7 of 7)	-3208	NM_001134939	51686	Hs.713789	NM_016178	protein-coding
1	89929859	89934185	ENSG00000171492		GEMIN8P4	gem nuclear organelle associated protein 8 pseudogene 4	0.0015	+	89929859	89934185	0	2	19,1119,	0,3207	-5.51	-6.48	-0.171	intron (NM_001134479, intron 2 of 2)	intron (NM_001134479, intron 2 of 2)	62944	NR_002830	492303	Hs.550796	NR_002830	pseudo
1	154549983	154550960	ENSG00000160714	ENSG00000229780	UBE2Q1-AS1	UBE2Q1 antisense RNA 1	0.017	-	154549983	154550960	0	2	486,23,	0,954	-3.32	-4.05	-0.171	intron (NM_017582, intron 12 of 12)	intron (NM_017582, intron 12 of 12)	-3137	NR_046668	100874097		NR_046668	ncRNA
1	235805898	235809500	ENSG00000143669	ENSG00000222831	MIR1537	microRNA 1537	0.00014	-	235805898	235809500	0	2	874,1046,	0,2556	-7.71	-8.87	-0.17	intron (NM_000081, intron 5 of 52)	intron (NM_000081, intron 5 of 52)	45361	NR_031718	100302139		NR_031718	ncRNA
1	64833976	64834576	ENSG00000162434	ENSG00000162437	RAVER2	ribonucleoprotein, PTB binding 2	0.12	-	64833976	64834576	0	1	600,	0	-1.64	-2.12	-0.168	3' UTR (NM_001321852, exon 25 of 25)	3' UTR (NM_001321852, exon 25 of 25)	89201	NM_018211	55225	Hs.591443	NM_018211	protein-coding
1	156797274	156800817	ENSG00000143294	ENSG00000198400	NTRK1	neurotrophic receptor tyrosine kinase 1	0.16	+	156797274	156800817	0	2	67,444,	0,3099	-1.41	-1.83	-0.166	intron (NM_005973, intron 6 of 6)	Tigger2|DNA|TcMar-Tigger	-16704	NM_001007792	4914	Hs.406293	NM_002529	protein-coding
1	117367807	117405603	ENSG00000198162	ENSG00000198162	MAN1A2	mannosidase alpha class 1A member 2	0.11	+	117367807	117405603	0	3	678,256,55,	0,34378,37741	-1.73	-2.22	-0.161	intron (NM_006699, intron 1 of 12)	intron (NM_006699, intron 1 of 12)	19256	NM_006699	10905	Hs.435938	NM_006699	protein-coding
1	151310243	151316490	ENSG00000143393	ENSG00000143393	PI4KB	phosphatidylinositol 4-kinase beta	0.12	-	151310243	151316490	0	2	12,918,	0,5329	-1.63	-2.1	-0.159	intron (NM_002651, intron 3 of 12)	intron (NM_002651, intron 3 of 12)	14049	NM_001198774	5298	Hs.632465	NM_002651	protein-coding
1	27409811	27410111	ENSG00000158195	ENSG00000181773	GPR3	G protein-coupled receptor 3	0.13	-	27409811	27410111	0	1	300,	0	-1.57	-2.02	-0.158	exon (NM_006990, exon 8 of 9)	exon (NM_006990, exon 8 of 9)	17339	NM_005281	2827	Hs.66542	NM_005281	protein-coding
1	153662231	153662469	ENSG00000143621	ENSG00000143553	SNAPIN	SNAP associated protein	0.025	-	153662231	153662469	0	1	238,	0	-2.99	-3.67	-0.158	TTS (NR_052020)	TTS (NR_052020)	3647	NM_012437	23557	Hs.32018	NM_012437	protein-coding
1	78004892	78016475	ENSG00000162616	ENSG00000162616	DNAJB4	DnaJ heat shock protein family (Hsp40) member B4	0.079	+	78004892	78016475	0	3	429,569,462,	0,8158,11121	-2	-2.54	-0.157	intron (NM_001317103, intron 1 of 1)	intron (NM_001317103, intron 1 of 1)	5745	NM_007034	11080	Hs.13852	NM_007034	protein-coding
1	47272163	47281149	ENSG00000123473	ENSG00000123473	STIL	STIL centriolar assembly protein	0.058	-	47272163	47281149	0	2	78,909,	0,8077	-2.27	-2.85	-0.156	intron (NM_001282938, intron 14 of 18)	AluSq2|SINE|Alu	37491	NM_001282939	6491	Hs.525198	NM_003035	protein-coding
1	151052882	151054294	ENSG00000197622	ENSG00000143443	C1orf56	chromosome 1 open reading frame 56	0.065	-	151052882	151054294	0	2	445,64,	0,1348	-2.17	-2.74	-0.156	intron (NM_020239, intron 4 of 4)	AluSz|SINE|Alu	5837	NM_017860	54964	Hs.549171	NM_017860	protein-coding
1	27847056	27850477	ENSG00000117751	ENSG00000252947	SCARNA1	small Cajal body-specific RNA 1	0.12	+	27847056	27850477	0	2	36,385,	0,3036	-1.67	-2.14	-0.154	intron (NM_138558, intron 6 of 6)	intron (NM_138558, intron 6 of 6)	14366	NR_002997	677774	Hs.689694	NR_002997	ncRNA
1	224153335	224158427	ENSG00000143756	ENSG00000143753	DEGS1	delta 4-desaturase, sphingolipid 1	0.063	+	224153335	224158427	0	2	2,1076,	0,4016	-2.19	-2.76	-0.154	intron (NR_049764, intron 3 of 3)	L2c|LINE|L2	-27359	NM_001321541	8560	Hs.299878	NM_003676	protein-coding
1	19339165	19339405	ENSG00000077549	ENSG00000040487	SLC66A1	solute carrier family 66 member 1	0.019	-	19339165	19339405	0	1	240,	0	-3.25	-3.96	-0.153	3' UTR (NM_001206541, exon 9 of 9)	3' UTR (NM_001206541, exon 9 of 9)	26959	NR_109848	54896	Hs.647620	NM_017765	protein-coding
1	62448585	62450880	ENSG00000162607	ENSG00000162607	USP1	ubiquitin specific peptidase 1	0.015	+	62448585	62450880	0	2	81,635,	0,1660	-3.46	-4.2	-0.153	intron (NM_001017415, intron 8 of 8)	AluJb|SINE|Alu	12684	NM_003368	7398	Hs.35086	NM_003368	protein-coding
1	90935499	90938625	ENSG00000122482	ENSG00000122482	ZNF644	zinc finger protein 644	0.12	-	90935499	90938625	0	3	29,606,354,	0,1985,2772	-1.61	-2.08	-0.15	intron (NM_032186, intron 2 of 3)	intron (NM_032186, intron 2 of 3)	84446	NM_016620	84146	Hs.173001	NM_016620	protein-coding
1	92474850	92476100	ENSG00000162676	ENSG00000162676	GFI1	growth factor independent 1 transcriptional repressor	0.00035	-	92474850	92476100	0	1	1250,	0	-6.87	-7.96	-0.15	3' UTR (NM_001127216, exon 7 of 7)	3' UTR (NM_001127216, exon 7 of 7)	8479	NM_001127215	2672	Hs.73172	NM_005263	protein-coding
1	25900834	25901573	ENSG00000117632	ENSG00000117632	STMN1	stathmin 1	0.00094	-	25900834	25901573	0	2	253,167,	0,572	-5.96	-6.97	-0.143	intron (NM_005563, intron 4 of 4)	intron (NM_005563, intron 4 of 4)	4949	NM_203401	3925	Hs.209983	NM_005563	protein-coding
1	203840324	203847642	ENSG00000257315	ENSG00000182004	SNRPE	small nuclear ribonucleoprotein polypeptide E	0.0078	+	203840324	203847642	0	2	50,459,	0,6859	-4.03	-4.85	-0.142	intron (NM_014827, intron 14 of 19)	AluSp|SINE|Alu	-17616	NM_001304464	6635	Hs.334612	NM_003094	protein-coding
1	6098464	6098945	ENSG00000069424	ENSG00000069424	KCNAB2	potassium voltage-gated channel subfamily A regulatory beta subunit 2	0.056	+	6098464	6098945	0	1	481,	0	-2.29	-2.88	-0.14	3' UTR (NM_003636, exon 16 of 16)	3' UTR (NM_003636, exon 16 of 16)	52817	NM_001199862	8514	Hs.440497	NM_003636	protein-coding
1	20941468	20942285	ENSG00000075151	ENSG00000221808	MIR1256	microRNA 1256	0.063	-	20941468	20942285	0	2	16,795,	0,22	-2.2	-2.77	-0.138	exon (NM_001198801, exon 11 of 35)	exon (NM_001198801, exon 11 of 35)	46555	NR_031657	100302155		NR_031657	ncRNA
1	203838029	203847649	ENSG00000058673	ENSG00000182004	SNRPE	small nuclear ribonucleoprotein polypeptide E	0.0084	+	203838029	203847649	0	3	35,69,466,	0,2276,9154	-3.97	-4.78	-0.138	intron (NM_014827, intron 14 of 19)	L1ME3D|LINE|L1	-18760	NM_001304464	6635	Hs.334612	NM_003094	protein-coding
1	150576945	150578655	ENSG00000143384	ENSG00000143384	MCL1	MCL1 apoptosis regulator, BCL2 family member	0.0045	-	150576945	150578655	0	2	546,412,	0,1298	-4.53	-5.4	-0.137	intron (NM_182763, intron 1 of 1)	intron (NM_182763, intron 1 of 1)	1810	NM_021960	4170	Hs.632486	NM_021960	protein-coding
1	31908609	31908910	ENSG00000184007	ENSG00000184007	PTP4A2	protein tyrosine phosphatase 4A2	0.14	-	31908609	31908910	0	1	301,	0	-1.51	-1.95	-0.136	3' UTR (NM_001369859, exon 7 of 7)	3' UTR (NM_001369859, exon 7 of 7)	29058	NM_001369859	8073	Hs.470477	NM_003479	protein-coding
1	26731171	26731532	ENSG00000117713	ENSG00000117713	ARID1A	AT-rich interaction domain 1A	0.11	+	26731171	26731532	0	1	361,	0	-1.75	-2.24	-0.12	exon (NM_006015, exon 3 of 20)	exon (NM_006015, exon 3 of 20)	35337	NM_006015	8289	Hs.468972	NM_006015	protein-coding
1	205619921	205623718	ENSG00000158711	ENSG00000158711	ELK4	ETS transcription factor ELK4	0.074	-	205619921	205623718	0	2	917,43,	0,3754	-2.06	-2.61	-0.12	intron (NM_021795, intron 2 of 2)	intron (NM_021795, intron 2 of 2)	11052	NM_021795	2005	Hs.497520	NM_001973	protein-coding
1	200615572	200620435	ENSG00000118193	ENSG00000118193	KIF14	kinesin family member 14	0.18	-	200615572	200620435	0	3	37,1227,25,	0,2039,4838	-1.32	-1.72	-0.116	exon (NM_014875, exon 2 of 30)	exon (NM_014875, exon 2 of 30)	834	NM_001305792	9928	Hs.3104	NM_014875	protein-coding
1	244854325	244854626	ENSG00000153187		SNORA100	small nucleolar RNA, H/ACA box 100	0.053	-	244854325	244854626	0	1	301,	0	-2.34	-2.94	-0.114	promoter-TSS (NR_132782)	promoter-TSS (NR_132782)	-259	NR_132782	106635532		NR_132782	snoRNA
1	214655229	214663959	ENSG00000117724	ENSG00000117724	CENPF	centromere protein F	0.034	+	214655229	214663959	0	4	174,478,179,369,	0,1703,3620,8361	-2.74	-3.39	-0.113	intron (NM_016343, intron 19 of 19)	intron (NM_016343, intron 19 of 19)	56399	NM_016343	1063	Hs.497741	NM_016343	protein-coding
1	179917631	179918441	ENSG00000143337	ENSG00000143337	TOR1AIP1	torsin 1A interacting protein 1	0.095	+	179917631	179918441	0	1	810,	0	-1.84	-2.35	-0.11	exon (NM_015602, exon 10 of 10)	exon (NM_015602, exon 10 of 10)	35994	NM_001267578	26092	Hs.496459	NM_015602	protein-coding
1	35190823	35191408	ENSG00000116560	ENSG00000116560	SFPQ	splicing factor proline and glutamine rich	0.18	-	35190823	35191408	0	2	172,68,	0,517	-1.31	-1.71	-0.106	intron (NM_005066, intron 2 of 9)	intron (NM_005066, intron 2 of 9)	2029	NM_005066	6421	Hs.355934	NM_005066	protein-coding
1	1386458	1387505	ENSG00000221978	ENSG00000221978	CCNL2	cyclin L2	0.14	-	1386458	1387505	0	1	1047,	0	-1.51	-1.95	-0.0971	non-coding (NR_135154, exon 13 of 13)	non-coding (NR_135154, exon 13 of 13)	11360	NM_001350497	81669	Hs.515704	NM_030937	protein-coding
1	171557316	171558066	ENSG00000117523		MYOCOS	myocilin opposite strand	0.04	+	171557316	171558066	0	1	750,	0	-2.58	-3.21	-0.087	exon (NM_015172, exon 19 of 34)	exon (NM_015172, exon 19 of 34)	-62072	NM_001368164	110806290		NM_001368164	protein-coding
1	89708635	89714045	ENSG00000171488	ENSG00000171488	LRRC8C	leucine rich repeat containing 8 VRAC subunit C	0.14	+	89708635	89714045	0	2	13,1337,	0,4073	-1.53	-1.98	-0.0757	intron (NM_032270, intron 2 of 2)	intron (NM_032270, intron 2 of 2)	78220	NM_032270	84230	Hs.412836	NM_032270	protein-coding
1	155659532	155661030	ENSG00000163374		SCARNA26A	small Cajal body-specific RNA 26A	0.18	-	155659532	155661030	0	1	1498,	0	-1.31	-1.72	-0.0628	exon (NM_001198899, exon 8 of 8)	exon (NM_001198899, exon 8 of 8)	18974	NR_132762	106633810		NR_132762	ncRNA
1	214643028	214653603	ENSG00000117724	ENSG00000117724	CENPF	centromere protein F	0.024	+	214643028	214653603	0	8	296,2844,13,14,153,177,162,119,	0,1528,4938,5456,5646,8681,9799,10456	-3.02	-3.71	0.062	intron (NM_016343, intron 13 of 19)	intron (NM_016343, intron 13 of 19)	45121	NM_016343	1063	Hs.497741	NM_016343	protein-coding
1	180093533	180095887	ENSG00000135837	ENSG00000116260	QSOX1	quiescin sulfhydryl oxidase 1	0.11	+	180093533	180095887	0	3	1083,52,365,	0,1613,1989	-1.74	-2.22	0.0868	intron (NM_014810, intron 34 of 37)	intron (NM_014810, intron 34 of 37)	-60123	NM_001004128	5768	Hs.719176	NM_002826	protein-coding
1	111139895	111159428	ENSG00000134255	ENSG00000134255	CEPT1	choline/ethanolamine phosphotransferase 1	0.17	+	111139895	111159428	0	6	19,82,64,64,412,49,	0,330,649,3586,7746,19484	-1.35	-1.76	0.0907	intron (NM_001007794, intron 2 of 8)	intron (NM_001007794, intron 2 of 8)	9439	NM_006090	10390	Hs.363572	NM_006090	protein-coding
1	246849625	246851978	ENSG00000153207		LINC01341	long intergenic non-protein coding RNA 1341	0.047	-	246849625	246851978	0	2	1817,74,	0,2279	-2.45	-3.06	0.102	exon (NM_001323342, exon 33 of 36)	exon (NM_001323342, exon 33 of 36)	61185	NR_015422	149134	Hs.720494	NM_207326	ncRNA
1	171537446	171542191	ENSG00000117523	ENSG00000117523	PRRC2C	proline rich coiled-coil 2C	6.1e-05	+	171537446	171542191	0	2	27,2221,	0,2524	-8.47	-9.7	0.111	intron (NM_015172, intron 15 of 33)	L1MB1|LINE|L1	54289	NM_015172	23215	Hs.494614	NM_015172	protein-coding
1	243164363	243166103	ENSG00000143702	ENSG00000214837	LINC01347	long intergenic non-protein coding RNA 1347	0.08	-	243164363	243166103	0	1	1740,	0	-2	-2.53	0.121	exon (NM_001042405, exon 12 of 19)	exon (NM_001042405, exon 12 of 19)	-63489	NR_029401	731275	Hs.722350	NR_029401	ncRNA
1	154454568	154466045	ENSG00000160712	ENSG00000163239	TDRD10	tudor domain containing 10	0.15	+	154454568	154466045	0	2	15,912,	0,10565	-1.47	-1.91	0.125	intron (NM_000565, intron 9 of 9)	intron (NM_000565, intron 9 of 9)	-41912	NM_001098475	126668	Hs.387671	NM_182499	protein-coding
1	23751127	23752492	ENSG00000011007	ENSG00000011007	ELOA	elongin A	0.16	+	23751127	23752492	0	2	903,86,	0,1279	-1.39	-1.81	0.129	exon (NM_003198, exon 4 of 11)	exon (NM_003198, exon 4 of 11)	8444	NM_003198	6924	Hs.15535	NM_003198	protein-coding
1	156744187	156744278	ENSG00000143321	ENSG00000143314	MRPL24	mitochondrial ribosomal protein L24	0.12	-	156744187	156744278	0	1	91,	0	-1.65	-2.12	0.133	exon (NM_001126051, exon 4 of 6)	exon (NM_001126051, exon 4 of 6)	-3145	NM_024540	79590	Hs.418233	NM_024540	protein-coding
1	15933282	15934182	ENSG00000065526	ENSG00000116809	ZBTB17	zinc finger and BTB domain containing 17	0.14	+	15933282	15934182	0	1	900,	0	-1.5	-1.94	0.134	exon (NM_015001, exon 11 of 15)	exon (NM_015001, exon 11 of 15)	42400	NM_001287603	7709	Hs.433764	NM_003443	protein-coding
1	160217243	160217926	ENSG00000132716	ENSG00000227741	LOC729867	uncharacterized LOC729867	0.14	-	160217243	160217926	0	2	465,76,	0,607	-1.5	-1.94	0.138	non-coding (NR_028103, exon 14 of 14)	non-coding (NR_028103, exon 14 of 14)	-8716	NR_123725	729867	Hs.674191	NR_123725	ncRNA
1	183542244	183544946	ENSG00000116698	ENSG00000116701	NCF2	neutrophil cytosolic factor 2	0.16	+	183542244	183544946	0	3	258,145,17,	0,2108,2685	-1.41	-1.83	0.145	intron (NM_001174061, intron 13 of 21)	Penelope1_Vert|LINE|Penelope	47009	NM_000433	4688	Hs.587558	NM_000433	protein-coding
1	43704289	43704857	ENSG00000066135		KDM4A-AS1	KDM4A antisense RNA 1	0.18	+	43704289	43704857	0	1	568,	0	-1.3	-1.71	0.147	3' UTR (NM_014663, exon 22 of 22)	3' UTR (NM_014663, exon 22 of 22)	2768	NR_033827	100132774	Hs.655569	NR_033827	ncRNA
1	171591289	171592043	ENSG00000117523		MYOCOS	myocilin opposite strand	0.039	+	171591289	171592043	0	2	24,457,	0,297	-2.62	-3.25	0.148	exon (NM_015172, exon 34 of 34)	exon (NM_015172, exon 34 of 34)	-28097	NM_001368164	110806290		NM_001368164	protein-coding
1	28201149	28208399	ENSG00000126698	ENSG00000169403	PTAFR	platelet activating factor receptor	0.0087	-	28201149	28208399	0	4	221,76,93,58,	0,2597,4108,7192	-3.95	-4.75	0.15	intron (NM_014280, intron 7 of 8)	AluSc|SINE|Alu	-10838	NM_001164721	5724	Hs.77542	NM_000952	protein-coding
1	165907725	165908205	ENSG00000143179	ENSG00000283936	MIR3658	microRNA 3658	0.12	+	165907725	165908205	0	1	480,	0	-1.66	-2.14	0.155	promoter-TSS (NR_037431)	promoter-TSS (NR_037431)	44	NR_037431	100500832		NR_037431	ncRNA
1	93134441	93137222	ENSG00000143033	ENSG00000117500	TMED5	transmembrane p24 trafficking protein 5	0.16	+	93134441	93137222	0	2	18,553,	0,2228	-1.39	-1.81	0.158	intron (NM_007358, intron 14 of 14)	MIR|SINE|MIR	44581	NR_030761	50999	Hs.482873	NM_016040	protein-coding
1	6100952	6101193	ENSG00000069424	ENSG00000069424	KCNAB2	potassium voltage-gated channel subfamily A regulatory beta subunit 2	0.08	+	6100952	6101193	0	1	241,	0	-1.99	-2.53	0.167	TTS (NM_015557)	TTS (NM_015557)	55185	NM_001199862	8514	Hs.440497	NM_003636	protein-coding
1	13778530	13780416	ENSG00000116731	ENSG00000116731	PRDM2	PR/SET domain 2	0.085	+	13778530	13780416	0	1	1886,	0	-1.95	-2.47	0.167	exon (NM_015866, exon 8 of 9)	exon (NM_015866, exon 8 of 9)	30058	NM_001007257	7799	Hs.371823	NM_012231	protein-coding
1	23961095	23961789	ENSG00000189266	ENSG00000189266	PNRC2	proline rich nuclear receptor coactivator 2	0.00069	+	23961095	23961789	0	2	39,350,	0,344	-6.24	-7.28	0.168	5' UTR (NM_017761, exon 3 of 3)	5' UTR (NM_017761, exon 3 of 3)	1614	NM_017761	55629	Hs.7862	NM_017761	protein-coding
1	202941120	202941539	ENSG00000159346	ENSG00000117153	KLHL12	kelch like family member 12	0.033	-	202941120	202941539	0	1	419,	0	-2.75	-3.4	0.17	3' UTR (NM_001290629, exon 9 of 9)	3' UTR (NM_001290629, exon 9 of 9)	-12731	NM_001303051	59349	Hs.706793	NM_021633	protein-coding
1	161517986	161518464	ENSG00000143226	ENSG00000173110	HSPA6	heat shock protein family A (Hsp70) member 6	0.029	+	161517986	161518464	0	1	478,	0	-2.87	-3.53	0.173	3' UTR (NM_021642, exon 7 of 7)	3' UTR (NM_021642, exon 7 of 7)	-6315	NM_002155	3310	Hs.654614	NM_002155	protein-coding
1	161171548	161172088	ENSG00000158850	ENSG00000143224	PPOX	protoporphyrinogen oxidase	0.11	-	161171548	161172088	0	1	540,	0	-1.7	-2.18	0.177	TTS (NM_001122764)	TTS (NM_001122764)	5172	NM_001365398	5498	Hs.517373	NM_000309	protein-coding
1	37566815	37567870	ENSG00000134697	ENSG00000163879	DNALI1	dynein axonemal light intermediate chain 1	0.02	-	37566815	37567870	0	2	192,198,	0,857	-3.21	-3.93	0.182	TTS (NM_003462)	TTS (NM_003462)	10403	NM_003462	7802	Hs.406050	NM_003462	protein-coding
1	197102339	197102819	ENSG00000066279	ENSG00000143278	F13B	coagulation factor XIII B chain	0.093	-	197102339	197102819	0	1	480,	0	-1.86	-2.38	0.184	exon (NM_018136, exon 18 of 28)	exon (NM_018136, exon 18 of 28)	-35312	NM_001994	2165	Hs.435782	NM_001994	protein-coding
1	71072127	71076799	ENSG00000132485	ENSG00000132485	ZRANB2	zinc finger RANBP2-type containing 2	0.024	-	71072127	71076799	0	3	128,77,5,	0,344,4667	-3.06	-3.75	0.188	intron (NM_203350, intron 4 of 9)	intron (NM_203350, intron 4 of 9)	6572	NM_005455	9406	Hs.194718	NM_005455	protein-coding
1	152032505	152032565	ENSG00000163191	ENSG00000163191	S100A11	S100 calcium binding protein A11	0.15	-	152032505	152032565	0	1	60,	0	-1.47	-1.9	0.189	TTS (NM_005620)	TTS (NM_005620)	4469	NM_005620	6282	Hs.417004	NM_005620	protein-coding
1	77725717	77728550	ENSG00000077254	ENSG00000077254	USP33	ubiquitin specific peptidase 33	0.14	-	77725717	77728550	0	2	45,256,	0,2577	-1.55	-2	0.19	intron (NM_015017, intron 11 of 24)	intron (NM_015017, intron 11 of 24)	32718	NM_201626	23032	Hs.480597	NM_015017	protein-coding
1	17408702	17409181	ENSG00000179051	ENSG00000179051	RCC2	regulator of chromosome condensation 2	0.0032	-	17408702	17409181	0	1	479,	0	-4.85	-5.75	0.194	3' UTR (NM_018715, exon 13 of 13)	3' UTR (NM_018715, exon 13 of 13)	29594	NM_001136204	55920	Hs.380857	NM_018715	protein-coding
1	24666870	24669726	ENSG00000133226	ENSG00000133226	SRRM1	serine and arginine repetitive matrix 1	0.00016	+	24666870	24669726	0	2	55,604,	0,2252	-7.61	-8.77	0.194	intron (NM_001366594, intron 14 of 17)	MIRb|SINE|MIR	24719	NM_001366597	10250	Hs.18192	NM_005839	protein-coding
1	156594576	156595746	ENSG00000160818	ENSG00000163382	NAXE	NAD(P)HX epimerase	0.13	-	156594576	156595746	0	1	1170,	0	-1.6	-2.07	0.194	TTS (NM_144772)	TTS (NM_144772)	3385	NM_144772	128240	Hs.528320	NM_144772	protein-coding
1	39004063	39004361	ENSG00000174574	ENSG00000174574	AKIRIN1	akirin 1	0.03	+	39004063	39004361	0	1	298,	0	-2.84	-3.51	0.195	3' UTR (NM_001136275, exon 4 of 4)	3' UTR (NM_001136275, exon 4 of 4)	12936	NM_024595	79647	Hs.293563	NM_024595	protein-coding
1	241633550	241639203	ENSG00000203668	ENSG00000203668	CHML	CHM like Rab escort protein	0.046	-	241633550	241639203	0	2	2523,21,	0,5632	-2.47	-3.08	0.196	promoter-TSS (NM_001821)	promoter-TSS (NM_001821)	-447	NM_001821	1122	Hs.654545	NM_001821	protein-coding
1	150622104	150622314	ENSG00000143420	ENSG00000143420	ENSA	endosulfine alpha	0.012	-	150622104	150622314	0	1	210,	0	-3.66	-4.43	0.2	3' UTR (NM_207045, exon 5 of 5)	3' UTR (NM_207045, exon 5 of 5)	6924	NM_207047	2029	Hs.632456	NM_004436	protein-coding
1	153981825	153982095	ENSG00000143545	ENSG00000143545	RAB13	RAB13, member RAS oncogene family	0.11	-	153981825	153982095	0	1	270,	0	-1.72	-2.2	0.201	non-coding (NR_073553, exon 8 of 8)	non-coding (NR_073553, exon 8 of 8)	3406	NM_001272038	5872	Hs.151536	NM_002870	protein-coding
1	236897016	236898384	ENSG00000116984	ENSG00000116984	MTR	5-methyltetrahydrofolate-homocysteine methyltransferase	0.099	+	236897016	236898384	0	2	102,827,	0,541	-1.81	-2.31	0.202	3' UTR (NM_001291939, exon 32 of 32)	3' UTR (NM_001291939, exon 32 of 32)	102408	NM_001291940	4548	Hs.498187	NM_000254	protein-coding
1	171532427	171536164	ENSG00000117523	ENSG00000117523	PRRC2C	proline rich coiled-coil 2C	6.2e-08	+	171532427	171536164	0	3	534,170,136,	0,3000,3601	-15	-16.6	0.203	intron (NM_015172, intron 12 of 33)	intron (NM_015172, intron 12 of 33)	48766	NM_015172	23215	Hs.494614	NM_015172	protein-coding
1	236551212	236552052	ENSG00000116977	ENSG00000223776	LGALS8-AS1	LGALS8 antisense RNA 1	0.16	+	236551212	236552052	0	1	840,	0	-1.43	-1.86	0.206	3' UTR (NM_006499, exon 12 of 12)	3' UTR (NM_006499, exon 12 of 12)	-27124	NR_034040	100287902	Hs.677376	NR_034040	ncRNA
1	246860916	246861187	ENSG00000153207	ENSG00000153207	AHCTF1	AT-hook containing transcription factor 1	0.16	-	246860916	246861187	0	1	271,	0	-1.39	-1.81	0.209	exon (NM_001323342, exon 29 of 36)	exon (NM_001323342, exon 29 of 36)	70306	NM_015446	25909	Hs.300887	NM_015446	protein-coding
1	12011596	12012106	ENSG00000116688	ENSG00000116691	MIIP	migration and invasion inhibitory protein	0.069	+	12011596	12012106	0	1	510,	0	-2.12	-2.67	0.211	3' UTR (NM_014874, exon 19 of 19)	3' UTR (NM_014874, exon 19 of 19)	-7647	NM_021933	60672	Hs.8595	NM_021933	protein-coding
1	17407838	17408988	ENSG00000179051	ENSG00000179051	RCC2	regulator of chromosome condensation 2	0.0064	-	17407838	17408988	0	2	716,9,	0,1141	-4.21	-5.05	0.211	3' UTR (NM_018715, exon 13 of 13)	3' UTR (NM_018715, exon 13 of 13)	30123	NM_001136204	55920	Hs.380857	NM_018715	protein-coding
1	1786843	1787322	ENSG00000078369	ENSG00000008130	NADK	NAD kinase	0.0087	-	1786843	1787322	0	2	210,1,	0,478	-3.94	-4.74	0.214	intron (NM_001282538, intron 9 of 9)	intron (NM_001282538, intron 9 of 9)	-7052	NM_001198994	65220	Hs.654792	NM_023018	protein-coding
1	183552900	183553379	ENSG00000116698	ENSG00000116701	NCF2	neutrophil cytosolic factor 2	0.028	+	183552900	183553379	0	1	479,	0	-2.91	-3.58	0.214	exon (NM_201569, exon 23 of 23)	exon (NM_201569, exon 23 of 23)	37464	NM_000433	4688	Hs.587558	NM_000433	protein-coding
1	31630366	31630723	ENSG00000162517	ENSG00000121764	HCRTR1	hypocretin receptor 1	0.14	-	31630366	31630723	0	1	357,	0	-1.51	-1.95	0.215	non-coding (NR_033686, exon 4 of 4)	non-coding (NR_033686, exon 4 of 4)	12845	NM_001525	3061	Hs.388226	NM_001525	protein-coding
1	156036075	156036315	ENSG00000160803	ENSG00000163479	SSR2	signal sequence receptor subunit 2	0.18	-	156036075	156036315	0	1	240,	0	-1.3	-1.7	0.215	3' UTR (NM_020131, exon 11 of 11)	3' UTR (NM_020131, exon 11 of 11)	-15244	NM_003145	6746	Hs.74564	NM_003145	protein-coding
1	161519001	161519390	ENSG00000143226	ENSG00000173110	HSPA6	heat shock protein family A (Hsp70) member 6	0.16	+	161519001	161519390	0	1	389,	0	-1.41	-1.83	0.217	3' UTR (NM_021642, exon 7 of 7)	3' UTR (NM_021642, exon 7 of 7)	-5344	NM_002155	3310	Hs.654614	NM_002155	protein-coding
1	15659844	15662272	ENSG00000197312	ENSG00000215695	RSC1A1	regulator of solute carriers 1	0.01	+	15659844	15662272	0	1	2428,	0	-3.79	-4.58	0.218	exon (NM_006511, exon 1 of 1)	exon (NM_006511, exon 1 of 1)	1345	NM_006511	6248	Hs.239459	NM_006511	protein-coding
1	150579348	150579678	ENSG00000143384	ENSG00000143384	MCL1	MCL1 apoptosis regulator, BCL2 family member	0.069	-	150579348	150579678	0	1	330,	0	-2.12	-2.68	0.223	promoter-TSS (NM_021960)	promoter-TSS (NM_021960)	97	NM_021960	4170	Hs.632486	NM_021960	protein-coding
1	214637992	214642879	ENSG00000117724	ENSG00000117724	CENPF	centromere protein F	1.5e-11	+	214637992	214642879	0	2	9,2959,	0,1928	-23	-24.9	0.223	exon (NM_016343, exon 12 of 20)	exon (NM_016343, exon 12 of 20)	37241	NM_016343	1063	Hs.497741	NM_016343	protein-coding
1	6223467	6224216	ENSG00000116237	ENSG00000116237	ICMT	isoprenylcysteine carboxyl methyltransferase	0.057	-	6223467	6224216	0	1	749,	0	-2.28	-2.87	0.224	3' UTR (NM_012405, exon 5 of 5)	3' UTR (NM_012405, exon 5 of 5)	12122	NM_012405	23463	Hs.515688	NM_012405	protein-coding
1	31259746	31260998	ENSG00000060688	ENSG00000084628	NKAIN1	sodium/potassium transporting ATPase interacting 1	0.051	-	31259746	31260998	0	2	375,44,	0,1208	-2.38	-2.98	0.225	intron (NM_004814, intron 9 of 9)	intron (NM_004814, intron 9 of 9)	-20485	NM_024522	79570	Hs.470259	NM_024522	protein-coding
1	197103058	197103929	ENSG00000066279	ENSG00000143278	F13B	coagulation factor XIII B chain	0.03	-	197103058	197103929	0	1	871,	0	-2.84	-3.51	0.226	exon (NM_018136, exon 18 of 28)	exon (NM_018136, exon 18 of 28)	-36227	NM_001994	2165	Hs.435782	NM_001994	protein-coding
1	150220709	150226775	ENSG00000143401	ENSG00000143401	ANP32E	acidic nuclear phosphoprotein 32 family member E	0.0032	-	150220709	150226775	0	3	52,109,168,	0,2476,5898	-4.85	-5.75	0.227	intron (NM_001136478, intron 4 of 5)	AluSp|SINE|Alu	10936	NM_001136479	81611	Hs.656466	NM_030920	protein-coding
1	70249923	70250224	ENSG00000116754	ENSG00000116754	SRSF11	serine and arginine rich splicing factor 11	0.00036	+	70249923	70250224	0	1	301,	0	-6.83	-7.92	0.228	intron (NM_001190987, intron 11 of 12)	intron (NM_001190987, intron 11 of 12)	28694	NM_001350616	9295	Hs.479693	NM_004768	protein-coding
1	193084579	193085089	ENSG00000116747	ENSG00000023572	GLRX2	glutaredoxin 2	0.088	+	193084579	193085089	0	1	510,	0	-1.91	-2.43	0.228	3' UTR (NM_004600, exon 9 of 9)	3' UTR (NM_004600, exon 9 of 9)	20644	NM_197962	51022	Hs.458283	NM_016066	protein-coding
1	197510315	197512925	ENSG00000213047	ENSG00000134376	CRB1	crumbs cell polarity complex component 1	0.18	-	197510315	197512925	0	3	657,217,55,	0,1412,2555	-1.3	-1.7	0.229	intron (NR_125340, intron 19 of 19)	intron (NR_125340, intron 19 of 19)	243368	NM_001193640	23418	Hs.126135	NM_012076	protein-coding
1	225985241	225991245	ENSG00000143751	ENSG00000143751	SDE2	SDE2 telomere maintenance homolog	0.016	-	225985241	225991245	0	3	282,493,3,	0,2654,6001	-3.39	-4.12	0.23	exon (NM_152608, exon 6 of 7)	exon (NM_152608, exon 6 of 7)	11100	NM_152608	163859	Hs.520192	NM_152608	protein-coding
1	168199907	168200206	ENSG00000143155	ENSG00000143155	TIPRL	TOR signaling pathway regulator	0.018	+	168199907	168200206	0	1	299,	0	-3.3	-4.02	0.231	3' UTR (NM_152902, exon 7 of 7)	3' UTR (NM_152902, exon 7 of 7)	21095	NM_001031800	261726	Hs.209431	NM_152902	protein-coding
1	151176587	151176977	ENSG00000163159	ENSG00000163157	TMOD4	tropomodulin 4	0.029	-	151176587	151176977	0	1	390,	0	-2.87	-3.53	0.232	promoter-TSS (NM_013353)	promoter-TSS (NM_013353)	-801	NM_013353	29765	Hs.709681	NM_013353	protein-coding
1	229517989	229518410	ENSG00000135776		LOC101927478	uncharacterized LOC101927478	0.085	-	229517989	229518410	0	1	421,	0	-1.93	-2.46	0.233	exon (NM_012089, exon 13 of 13)	exon (NM_012089, exon 13 of 13)	9770	NR_110630	101927478	Hs.229275	NR_110630	ncRNA
1	1712289	1719254	ENSG00000008128	ENSG00000008128	CDK11A	cyclin dependent kinase 11A	0.17	-	1712289	1719254	0	3	138,133,89,	0,4056,6876	-1.36	-1.77	0.236	intron (NM_001313982, intron 5 of 19)	intron (NM_001313982, intron 5 of 19)	8585	NM_033529	728642	Hs.651228	NM_024011	protein-coding
1	15929929	15931277	ENSG00000065526	ENSG00000116809	ZBTB17	zinc finger and BTB domain containing 17	0.0013	+	15929929	15931277	0	1	1348,	0	-5.68	-6.67	0.237	exon (NM_015001, exon 11 of 15)	exon (NM_015001, exon 11 of 15)	45529	NM_001287603	7709	Hs.433764	NM_003443	protein-coding
1	100080577	100082485	ENSG00000156875	ENSG00000156875	MFSD14A	major facilitator superfamily domain containing 14A	0.0039	+	100080577	100082485	0	2	82,483,	0,1425	-4.66	-5.54	0.237	intron (NM_033055, intron 11 of 11)	AluSz|SINE|Alu	43436	NM_033055	64645	Hs.124156	NM_033055	protein-coding
1	222669800	222670212	ENSG00000186063	ENSG00000154305	MIA3	MIA SH3 domain ER export factor 3	0.16	-	222669800	222670212	0	2	189,80,	0,332	-1.39	-1.81	0.238	intron (NM_022831, intron 9 of 9)	intron (NM_022831, intron 9 of 9)	25703	NM_001300867	375056	Hs.118474	NM_198551	protein-coding
1	151404071	151404251	ENSG00000143442	ENSG00000159377	PSMB4	proteasome subunit beta 4	0.15	-	151404071	151404251	0	1	180,	0	-1.48	-1.92	0.24	3' UTR (NM_207171, exon 17 of 17)	3' UTR (NM_207171, exon 17 of 17)	4588	NM_002796	5692	Hs.89545	NM_002796	protein-coding
1	235194147	235220497	ENSG00000054267	ENSG00000263439	MIR4753	microRNA 4753	0.0049	-	235194147	235220497	0	5	64,85,258,176,196,	0,1883,19621,25645,26154	-4.46	-5.32	0.241	intron (NM_031371, intron 16 of 22)	L2|LINE|L2	-17206	NR_039908	100616224		NR_039908	ncRNA
1	19258545	19259118	ENSG00000053372	ENSG00000053372	MRTO4	MRT4 homolog, ribosome maturation factor	0.18	+	19258545	19259118	0	2	8,438,	0,135	-1.33	-1.73	0.244	3' UTR (NM_016183, exon 8 of 8)	3' UTR (NM_016183, exon 8 of 8)	7027	NM_016183	51154	Hs.463797	NM_016183	protein-coding
1	1712305	1719429	ENSG00000268575	ENSG00000008128	CDK11A	cyclin dependent kinase 11A	0.13	-	1712305	1719429	0	3	95,133,72,	0,4040,7052	-1.57	-2.02	0.245	intron (NM_001313982, intron 5 of 19)	intron (NM_001313982, intron 5 of 19)	8490	NM_033529	728642	Hs.651228	NM_024011	protein-coding
1	633695	634376	ENSG00000248527		MIR12136	microRNA 12136	3.4e-47	+	633695	634376	0	1	681,	0	-104	-107	0.247	Intergenic	Intergenic	-1351	NR_162149	113219467		NR_162149	ncRNA
1	108699254	108700154	ENSG00000134186	ENSG00000134186	PRPF38B	pre-mRNA processing factor 38B	8.4e-09	+	108699254	108700154	0	1	900,	0	-16.9	-18.6	0.249	exon (NM_001349768, exon 7 of 7)	exon (NM_001349768, exon 7 of 7)	7394	NM_001349765	55119	Hs.342307	NM_018061	protein-coding
1	629818	630683	ENSG00000225630	ENSG00000230021	LOC101928626	uncharacterized LOC101928626	3.7e-05	+	629818	630683	0	1	865,	0	-8.96	-10.2	0.257	Intergenic	Intergenic	-1242	NR_125957	101928626	Hs.637667	NR_125957	ncRNA
1	36300931	36304278	ENSG00000054118	ENSG00000214193	SH3D21	SH3 domain containing 21	8.3e-06	+	36300931	36304278	0	3	153,144,483,	0,621,2864	-10.4	-11.7	0.257	intron (NM_001321471, intron 12 of 12)	L3|LINE|CR1	-3763	NM_001162530	79729	Hs.524496	NM_024676	protein-coding
1	90010222	90013211	ENSG00000162664	ENSG00000162664	ZNF326	zinc finger protein 326	0.12	+	90010222	90013211	0	2	64,86,	0,2903	-1.66	-2.14	0.258	intron (NM_001320185, intron 6 of 11)	L1MB5|LINE|L1	16607	NM_182976	284695	Hs.306221	NM_181781	protein-coding
1	200971219	200972060	ENSG00000116852	ENSG00000233217	MROH3P	maestro heat like repeat family member 3, pseudogene	0.0024	-	200971219	200972060	0	1	841,	0	-5.11	-6.04	0.259	3' UTR (NM_001252100, exon 35 of 35)	3' UTR (NM_001252100, exon 35 of 35)	42696	NR_147176	647215	Hs.576504	NR_147176	pseudo
1	150505649	150507429	ENSG00000143374	ENSG00000143369	ECM1	extracellular matrix protein 1	0.1	+	150505649	150507429	0	2	56,514,	0,1266	-1.77	-2.27	0.261	intron (NR_073513, intron 13 of 13)	intron (NR_073513, intron 13 of 13)	-1570	NM_022664	1893	Hs.81071	NM_004425	protein-coding
1	200970409	200970710	ENSG00000116852	ENSG00000233217	MROH3P	maestro heat like repeat family member 3, pseudogene	0.12	-	200970409	200970710	0	1	301,	0	-1.63	-2.1	0.261	3' UTR (NM_001252100, exon 35 of 35)	3' UTR (NM_001252100, exon 35 of 35)	41616	NR_147176	647215	Hs.576504	NR_147176	pseudo
1	23967409	23967920	ENSG00000188529	ENSG00000189266	PNRC2	proline rich nuclear receptor coactivator 2	0.031	-	23967409	23967920	0	1	511,	0	-2.82	-3.48	0.262	non-coding (NR_034035, exon 7 of 7)	non-coding (NR_034035, exon 7 of 7)	7837	NM_017761	55629	Hs.7862	NM_017761	protein-coding
1	198319602	198320053	ENSG00000151414	ENSG00000151414	NEK7	NIMA related kinase 7	0.052	+	198319602	198320053	0	1	451,	0	-2.36	-2.96	0.262	3' UTR (NM_133494, exon 10 of 10)	3' UTR (NM_133494, exon 10 of 10)	162830	NM_133494	140609	Hs.24119	NM_133494	protein-coding
1	54741431	54742388	ENSG00000243725	ENSG00000162396	PARS2	prolyl-tRNA synthetase 2, mitochondrial	0.1	+	54741431	54742388	0	1	957,	0	-1.79	-2.29	0.263	non-coding (NR_037639, exon 33 of 33)	non-coding (NR_037639, exon 33 of 33)	22613	NM_152268	25973	Hs.380169	NM_152268	protein-coding
1	246660258	246666222	ENSG00000162852	ENSG00000143653	SCCPDH	saccharopine dehydrogenase (putative)	0.11	+	246660258	246666222	0	2	76,523,	0,5441	-1.71	-2.2	0.263	intron (NM_152609, intron 10 of 10)	AluJb|SINE|Alu	-61169	NM_016002	51097	Hs.498397	NM_016002	protein-coding
1	52414819	52416768	ENSG00000134748	ENSG00000134748	PRPF38A	pre-mRNA processing factor 38A	0.14	+	52414819	52416768	0	3	40,49,121,	0,518,1828	-1.5	-1.94	0.266	intron (NM_032864, intron 9 of 9)	intron (NM_032864, intron 9 of 9)	11192	NM_032864	84950	Hs.5301	NM_032284	protein-coding
1	100080543	100082485	ENSG00000283761	ENSG00000156875	MFSD14A	major facilitator superfamily domain containing 14A	0.0013	+	100080543	100082485	0	2	116,483,	0,1459	-5.68	-6.67	0.266	intron (NM_033055, intron 11 of 11)	AluSz|SINE|Alu	43419	NM_033055	64645	Hs.124156	NM_033055	protein-coding
1	35381268	35385484	ENSG00000146463	ENSG00000227409	ZMYM4-AS1	ZMYM4 antisense RNA 1	0.087	+	35381268	35385484	0	3	165,213,43,	0,277,4173	-1.92	-2.44	0.268	intron (NM_005095, intron 9 of 29)	intron (NM_005095, intron 9 of 29)	-17299	NR_046659	100861513	Hs.585397	NR_046659	ncRNA
1	70262526	70270863	ENSG00000118454	ENSG00000116754	SRSF11	serine and arginine rich splicing factor 11	0.11	-	70262526	70270863	0	2	321,8,	0,8329	-1.69	-2.17	0.27	intron (NM_030816, intron 12 of 12)	L1MD2|LINE|L1	45315	NM_001350616	9295	Hs.479693	NM_004768	protein-coding
1	166854186	166854517	ENSG00000143157	ENSG00000143157	POGK	pogo transposable element derived with KRAB domain	0.073	+	166854186	166854517	0	1	331,	0	-2.07	-2.62	0.275	3' UTR (NM_001314014, exon 4 of 4)	3' UTR (NM_001314014, exon 4 of 4)	14877	NM_017542	57645	Hs.432752	NM_017542	protein-coding
1	117075015	117075854	ENSG00000116830	ENSG00000116830	TTF2	transcription termination factor 2	0.015	+	117075015	117075854	0	1	839,	0	-3.43	-4.17	0.276	exon (NM_003594, exon 5 of 23)	exon (NM_003594, exon 5 of 23)	15109	NM_003594	8458	Hs.32333	NM_003594	protein-coding
1	156526033	156526514	ENSG00000183856	ENSG00000116604	MEF2D	myocyte enhancer factor 2D	0.0068	-	156526033	156526514	0	1	481,	0	-4.16	-4.99	0.276	3' UTR (NM_178229, exon 38 of 38)	3' UTR (NM_178229, exon 38 of 38)	-25499	NM_005920	4209	Hs.314327	NM_005920	protein-coding
1	54741469	54742308	ENSG00000271723	ENSG00000162396	PARS2	prolyl-tRNA synthetase 2, mitochondrial	0.09	+	54741469	54742308	0	1	839,	0	-1.89	-2.41	0.277	non-coding (NR_037639, exon 33 of 33)	non-coding (NR_037639, exon 33 of 33)	22634	NM_152268	25973	Hs.380169	NM_152268	protein-coding
1	244855704	244855765	ENSG00000153187		SNORA100	small nucleolar RNA, H/ACA box 100	0.052	-	244855704	244855765	0	1	61,	0	-2.37	-2.96	0.279	intron (NM_031844, intron 11 of 13)	intron (NM_031844, intron 11 of 13)	-1518	NR_132782	106635532		NR_132782	snoRNA
1	91515867	91524449	ENSG00000097046	ENSG00000097046	CDC7	cell division cycle 7	0.0062	+	91515867	91524449	0	3	9,151,409,	0,4262,8173	-4.25	-5.08	0.289	exon (NM_003503, exon 11 of 12)	exon (NM_003503, exon 11 of 12)	19050	NM_001134420	8317	Hs.533573	NM_003503	protein-coding
1	92840587	92841924	ENSG00000122406	ENSG00000207523	SNORA66	small nucleolar RNA, H/ACA box 66	2.4e-22	+	92840587	92841924	0	2	52,159,	0,1178	-47.3	-49.8	0.29	TTS (NR_002444)	TTS (NR_002444)	537	NR_002444	26782	Hs.180946	NR_002444	snoRNA
1	45606565	45608315	ENSG00000132780	ENSG00000159588	CCDC17	coiled-coil domain containing 17	1.1e-08	+	45606565	45608315	0	2	115,995,	0,755	-16.6	-18.3	0.293	exon (NM_001195193, exon 4 of 13)	exon (NM_001195193, exon 4 of 13)	16614	NM_001114938	149483	Hs.18912	NM_152500	protein-coding
1	17407745	17408553	ENSG00000179051	ENSG00000179051	RCC2	regulator of chromosome condensation 2	9.2e-06	-	17407745	17408553	0	1	808,	0	-10.3	-11.6	0.295	3' UTR (NM_018715, exon 13 of 13)	3' UTR (NM_018715, exon 13 of 13)	30387	NM_001136204	55920	Hs.380857	NM_018715	protein-coding
1	50968772	50969491	ENSG00000123080	ENSG00000123080	CDKN2C	cyclin dependent kinase inhibitor 2C	0.0049	+	50968772	50969491	0	1	719,	0	-4.46	-5.32	0.295	5' UTR (NM_001262, exon 1 of 3)	5' UTR (NM_001262, exon 1 of 3)	437	NM_001262	1031	Hs.525324	NM_001262	protein-coding
1	9268819	9270318	ENSG00000049239	ENSG00000171621	SPSB1	splA/ryanodine receptor domain and SOCS box containing 1	0.058	+	9268819	9270318	0	1	1499,	0	-2.26	-2.84	0.297	3' UTR (NM_004285, exon 5 of 5)	3' UTR (NM_004285, exon 5 of 5)	-23325	NM_025106	80176	Hs.8261	NM_025106	protein-coding
1	173885794	173886935	ENSG00000185278	ENSG00000234741	GAS5	growth arrest specific 5	0.13	+	173885794	173886935	0	1	1141,	0	-1.56	-2.02	0.299	3' UTR (NM_001346115, exon 4 of 4)	3' UTR (NM_001346115, exon 4 of 4)	-17483	NR_152521	60674	Hs.531856	NR_002578	ncRNA
1	180502175	180502505	ENSG00000230124	ENSG00000230124	ACBD6	acyl-CoA binding domain containing 6	0.14	-	180502175	180502505	0	1	330,	0	-1.51	-1.96	0.303	5' UTR (NM_032360, exon 1 of 8)	5' UTR (NM_032360, exon 1 of 8)	237	NM_032360	84320	Hs.200051	NM_032360	protein-coding
1	632756	633053	ENSG00000229344		MIR12136	microRNA 12136	0.055	+	632756	633053	0	1	297,	0	-2.31	-2.9	0.308	promoter-TSS (NR_162149)	promoter-TSS (NR_162149)	-220	NR_162149	113219467		NR_162149	ncRNA
1	179847593	179859127	ENSG00000169905	ENSG00000169905	TOR1AIP2	torsin 1A interacting protein 2	0.016	-	179847593	179859127	0	4	43,519,180,98,	0,3251,5038,11436	-3.42	-4.15	0.313	intron (NM_145034, intron 2 of 5)	intron (NM_145034, intron 2 of 5)	15480	NM_001349933	163590	Hs.571797	NM_022347	protein-coding
1	85707654	85708134	ENSG00000117174	ENSG00000117174	ZNHIT6	zinc finger HIT-type containing 6	0.031	-	85707654	85708134	0	1	480,	0	-2.82	-3.48	0.315	exon (NM_001170670, exon 2 of 11)	exon (NM_001170670, exon 2 of 11)	539	NM_001170670	54680	Hs.5111	NM_017953	protein-coding
1	26472449	26473207	ENSG00000198830	ENSG00000198830	HMGN2	high mobility group nucleosomal binding domain 2	9.7e-05	+	26472449	26473207	0	2	178,2,	0,756	-8.05	-9.24	0.318	intron (NM_005517, intron 1 of 5)	CpG	388	NM_005517	3151	Hs.181163	NM_005517	protein-coding
1	185311130	185317030	ENSG00000116679	ENSG00000116679	IVNS1ABP	influenza virus NS1A binding protein	0.085	-	185311130	185317030	0	2	192,78,	0,5822	-1.93	-2.46	0.319	intron (NM_006469, intron 1 of 14)	intron (NM_006469, intron 1 of 14)	3163	NM_006469	10625	Hs.497183	NM_006469	protein-coding
1	6529133	6532647	ENSG00000162408	ENSG00000171680	PLEKHG5	pleckstrin homology and RhoGEF domain containing G5	0.078	-	6529133	6532647	0	3	38,112,419,	0,2834,3095	-2.01	-2.55	0.322	intron (NM_024654, intron 9 of 11)	MIR|SINE|MIR	-10829	NM_198681	57449	Hs.284232	NM_020631	protein-coding
1	161048413	161048983	ENSG00000186517	ENSG00000158773	USF1	upstream transcription factor 1	3.7e-07	-	161048413	161048983	0	1	570,	0	-13.3	-14.8	0.325	exon (NM_001287600, exon 11 of 11)	exon (NM_001287600, exon 11 of 11)	-2721	NM_007122	7391	Hs.414880	NM_007122	protein-coding
1	77565198	77568333	ENSG00000036549	ENSG00000036549	ZZZ3	zinc finger ZZ-type containing 3	0.0028	-	77565198	77568333	0	3	586,101,2,	0,882,3133	-4.97	-5.88	0.334	intron (NM_015534, intron 13 of 14)	intron (NM_015534, intron 13 of 14)	115892	NM_015534	26009	Hs.480506	NM_015534	protein-coding
1	114396257	114397838	ENSG00000197323	ENSG00000197323	TRIM33	tripartite motif containing 33	0.049	-	114396257	114397838	0	2	248,107,	0,1474	-2.42	-3.02	0.338	3' UTR (NM_033020, exon 19 of 19)	3' UTR (NM_033020, exon 19 of 19)	114155	NM_033020	51592	Hs.26837	NM_015906	protein-coding
1	54850105	54851484	ENSG00000116133	ENSG00000116133	DHCR24	24-dehydrocholesterol reductase	0.0001	-	54850105	54851484	0	1	1379,	0	-7.98	-9.17	0.339	3' UTR (NM_014762, exon 9 of 9)	3' UTR (NM_014762, exon 9 of 9)	36400	NM_014762	1718	Hs.498727	NM_014762	protein-coding
1	42841972	42844641	ENSG00000228192	ENSG00000164011	ZNF691	zinc finger protein 691	0.063	-	42841972	42844641	0	4	41,142,47,131,	0,802,1431,2538	-2.19	-2.76	0.343	3' UTR (NM_018538, exon 11 of 11)	3' UTR (NM_018538, exon 11 of 11)	-3266	NM_015911	51058	Hs.20879	NM_015911	protein-coding
1	121183491	121183789	ENSG00000188610	ENSG00000188610	FAM72B	family with sequence similarity 72 member B	0.1	-	121183491	121183789	0	1	298,	0	-1.8	-2.3	0.343	5' UTR (NM_001320149, exon 1 of 4)	5' UTR (NM_001320149, exon 1 of 4)	271	NM_001320149	653820	Hs.339665	NM_001100910	protein-coding
1	46608013	46608731	ENSG00000142961	ENSG00000079277	MKNK1	MAPK interacting serine/threonine kinase 1	0.11	-	46608013	46608731	0	1	718,	0	-1.72	-2.21	0.347	3' UTR (NM_145279, exon 4 of 4)	3' UTR (NM_145279, exon 4 of 4)	-4104	NM_003684	8569	Hs.371594	NM_003684	protein-coding
1	1646174	1652565	ENSG00000248333	ENSG00000248333	CDK11B	cyclin dependent kinase 11B	0.0039	-	1646174	1652565	0	3	4,139,127,	0,3324,6264	-4.67	-5.55	0.348	intron (NM_001787, intron 5 of 19)	AluY|SINE|Alu	9634	NM_001787	984	Hs.651228	NM_001787	protein-coding
1	19218990	19219617	ENSG00000127463	ENSG00000230424	EMC1-AS1	EMC1 antisense RNA 1	0.011	-	19218990	19219617	0	2	492,49,	0,578	-3.75	-4.53	0.349	exon (NM_001271429, exon 22 of 22)	exon (NM_001271429, exon 22 of 22)	8918	NR_135115	101927895	Hs.660534	NR_135114	ncRNA
1	27548355	27549464	ENSG00000126705	ENSG00000126705	AHDC1	AT-hook DNA binding motif containing 1	0.16	-	27548355	27549464	0	1	1109,	0	-1.39	-1.81	0.356	exon (NM_001029882, exon 6 of 7)	exon (NM_001029882, exon 6 of 7)	54584	NM_001029882	27245	Hs.469280	NM_001029882	protein-coding
1	116066694	116067364	ENSG00000163393	ENSG00000173212	MAB21L3	mab-21 like 3	0.034	+	116066694	116067364	0	2	14,346,	0,324	-2.73	-3.38	0.357	exon (NM_018420, exon 12 of 12)	exon (NM_018420, exon 12 of 12)	-44726	NM_152367	126868	Hs.376194	NM_152367	protein-coding
1	6619907	6621999	ENSG00000116273	ENSG00000041988	THAP3	THAP domain containing 3	0.12	+	6619907	6621999	0	2	430,589,	0,1503	-1.67	-2.14	0.362	intron (NM_153812, intron 3 of 3)	AluSx3|SINE|Alu	-3912	NM_001195753	90326	Hs.689006	NM_138350	protein-coding
1	154944732	154945091	ENSG00000163346	ENSG00000163344	PMVK	phosphomevalonate kinase	0.054	-	154944732	154945091	0	1	359,	0	-2.33	-2.92	0.366	3' UTR (NM_001317734, exon 10 of 10)	3' UTR (NM_001317734, exon 10 of 10)	-2254	NM_001323012	10654	Hs.30954	NM_006556	protein-coding
1	204551581	204551912	ENSG00000198625	ENSG00000198625	MDM4	MDM4 regulator of p53	0.0092	+	204551581	204551912	0	1	331,	0	-3.89	-4.69	0.369	3' UTR (NM_001278519, exon 5 of 5)	3' UTR (NM_001278519, exon 5 of 5)	35341	NM_002393	4194	Hs.497492	NM_002393	protein-coding
1	15659868	15661722	ENSG00000215695	ENSG00000215695	RSC1A1	regulator of solute carriers 1	0.00011	+	15659868	15661722	0	1	1854,	0	-7.9	-9.08	0.37	exon (NM_006511, exon 1 of 1)	exon (NM_006511, exon 1 of 1)	1082	NM_006511	6248	Hs.239459	NM_006511	protein-coding
1	70244790	70248517	ENSG00000116754	ENSG00000116754	SRSF11	serine and arginine rich splicing factor 11	3.4e-11	+	70244790	70248517	0	4	25,178,33,124,	0,1939,2326,3603	-22.2	-24.1	0.375	intron (NM_001190987, intron 9 of 12)	intron (NM_001190987, intron 9 of 12)	25274	NM_001350616	9295	Hs.479693	NM_004768	protein-coding
1	235977504	235977984	ENSG00000116962	ENSG00000116962	NID1	nidogen 1	0.17	-	235977504	235977984	0	1	480,	0	-1.37	-1.79	0.375	3' UTR (NM_002508, exon 20 of 20)	3' UTR (NM_002508, exon 20 of 20)	87346	NM_002508	4811	Hs.356624	NM_002508	protein-coding
1	27414879	27414939	ENSG00000158195	ENSG00000181773	GPR3	G protein-coupled receptor 3	0.014	-	27414879	27414939	0	1	60,	0	-3.5	-4.25	0.377	exon (NM_001201404, exon 6 of 8)	exon (NM_001201404, exon 6 of 8)	22287	NM_005281	2827	Hs.66542	NM_005281	protein-coding
1	205717660	205718019	ENSG00000069275	ENSG00000069275	NUCKS1	nuclear casein kinase and cyclin dependent kinase substrate 1	0.00035	-	205717660	205718019	0	1	359,	0	-6.88	-7.97	0.38	3' UTR (NM_022731, exon 7 of 7)	3' UTR (NM_022731, exon 7 of 7)	32342	NM_022731	64710	Hs.213061	NM_022731	protein-coding
1	178467339	178473951	ENSG00000075391	ENSG00000240021	TEX35	testis expressed 35	0.014	+	178467339	178473951	0	3	82,31,877,	0,3353,5735	-3.52	-4.27	0.382	intron (NM_004841, intron 15 of 15)	intron (NM_004841, intron 15 of 15)	-42464	NM_001170723	84066	Hs.534501	NM_032126	protein-coding
1	27966664	27967679	ENSG00000158156	ENSG00000158156	XKR8	XK related 8	0.15	+	27966664	27967679	0	1	1015,	0	-1.44	-1.87	0.388	exon (NM_018053, exon 3 of 3)	exon (NM_018053, exon 3 of 3)	7710	NM_018053	55113	Hs.55024	NM_018053	protein-coding
1	90916405	90916615	ENSG00000122482		LINC01763	long intergenic non-protein coding RNA 1763	0.044	-	90916405	90916615	0	1	210,	0	-2.51	-3.12	0.389	3' UTR (NM_016620, exon 4 of 4)	3' UTR (NM_016620, exon 4 of 4)	64751	NR_146610	105378854	Hs.606283	NR_146610	ncRNA
1	184794370	184795119	ENSG00000135842	ENSG00000116406	EDEM3	ER degradation enhancing alpha-mannosidase like protein 3	2.8e-05	-	184794370	184795119	0	1	749,	0	-9.26	-10.5	0.389	3' UTR (NM_052966, exon 14 of 14)	3' UTR (NM_052966, exon 14 of 14)	-39887	NR_135118	80267	Hs.523811	NM_025191	protein-coding
1	40416988	40422166	ENSG00000084070	ENSG00000084070	SMAP2	small ArfGAP2	0.0002	+	40416988	40422166	0	2	108,191,	0,4987	-7.39	-8.52	0.392	intron (NM_022733, intron 9 of 9)	AluSx1|SINE|Alu	22777	NM_001198980	64744	Hs.15200	NM_022733	protein-coding
1	206463543	206464203	ENSG00000266028	ENSG00000263528	IKBKE	inhibitor of nuclear factor kappa B kinase subunit epsilon	0.093	+	206463543	206464203	0	1	660,	0	-1.87	-2.38	0.396	3' UTR (NM_001170637, exon 22 of 22)	3' UTR (NM_001170637, exon 22 of 22)	-6603	NM_001193322	9641	Hs.321045	NM_014002	protein-coding
1	11285744	11286224	ENSG00000120942	ENSG00000120942	UBIAD1	UbiA prenyltransferase domain containing 1	0.0091	+	11285744	11286224	0	1	480,	0	-3.9	-4.7	0.403	exon (NM_013319, exon 2 of 2)	exon (NM_013319, exon 2 of 2)	12786	NM_001330350	29914	Hs.522933	NM_013319	protein-coding
1	205718078	205720617	ENSG00000069275	ENSG00000069275	NUCKS1	nuclear casein kinase and cyclin dependent kinase substrate 1	1.2e-28	-	205718078	205720617	0	3	401,200,117,	0,1448,2422	-61.6	-64.3	0.405	intron (NM_022731, intron 6 of 6)	intron (NM_022731, intron 6 of 6)	30834	NM_022731	64710	Hs.213061	NM_022731	protein-coding
1	160546634	160547654	ENSG00000066294	ENSG00000162739	SLAMF6	SLAM family member 6	0.03	-	160546634	160547654	0	1	1020,	0	-2.83	-3.5	0.407	3' UTR (NM_001184879, exon 8 of 8)	3' UTR (NM_001184879, exon 8 of 8)	-23889	NM_052931	114836	Hs.492348	NM_052931	protein-coding
1	24648937	24650627	ENSG00000133226	ENSG00000133226	SRRM1	serine and arginine repetitive matrix 1	5e-06	+	24648937	24650627	0	3	92,116,63,	0,1033,1627	-10.8	-12.2	0.409	intron (NM_001366594, intron 4 of 17)	intron (NM_001366594, intron 4 of 17)	6203	NM_001366597	10250	Hs.18192	NM_005839	protein-coding
1	145746736	145748033	ENSG00000265491	ENSG00000117281	CD160	CD160 molecule	0.013	-	145746736	145748033	0	2	261,39,	0,1258	-3.58	-4.34	0.415	intron (NM_014455, intron 8 of 8)	AluSz6|SINE|Alu	27886	NR_103845	11126	Hs.488237	NM_007053	protein-coding
1	171566397	171566748	ENSG00000117523		MYOCOS	myocilin opposite strand	1.1e-05	+	171566397	171566748	0	2	24,157,	0,194	-10.1	-11.4	0.417	intron (NM_015172, intron 21 of 33)	intron (NM_015172, intron 21 of 33)	-53190	NM_001368164	110806290		NM_001368164	protein-coding
1	211749561	211750041	ENSG00000123684		LOC91548	uncharacterized LOC91548	0.01	-	211749561	211750041	0	1	480,	0	-3.79	-4.58	0.419	3' UTR (NM_001320808, exon 8 of 8)	3' UTR (NM_001320808, exon 8 of 8)	74039	NR_148994	91548	Hs.367839	NR_148994	ncRNA
1	53209991	53213416	ENSG00000236723	ENSG00000162384	CZIB	CXXC motif containing zinc binding protein	0.048	-	53209991	53213416	0	4	221,120,89,229,	0,298,464,3196	-2.43	-3.04	0.42	intron (NM_000098, intron 4 of 4)	AluSq2|SINE|Alu	8930	NM_017887	54987	Hs.525391	NM_017887	protein-coding
1	149943659	149947255	ENSG00000264522	ENSG00000014914	MTMR11	myotubularin related protein 11	0.022	-	149943659	149947255	0	2	1406,5,	0,3591	-3.11	-3.81	0.422	intron (NM_020205, intron 11 of 11)	intron (NM_020205, intron 11 of 11)	-8578	NM_001145862	10903	Hs.425144	NM_006697	protein-coding
1	156249223	156249434	ENSG00000198952	ENSG00000160781	PAQR6	progestin and adipoQ receptor family member 6	0.00099	-	156249223	156249434	0	1	211,	0	-5.91	-6.92	0.427	3' UTR (NM_001323614, exon 21 of 21)	3' UTR (NM_001323614, exon 21 of 21)	-1212	NM_001272112	79957	Hs.235873	NM_024897	protein-coding
1	200406133	200406820	ENSG00000162702	ENSG00000162702	ZNF281	zinc finger protein 281	0.0092	-	200406133	200406820	0	1	687,	0	-3.89	-4.69	0.427	3' UTR (NM_001281294, exon 3 of 3)	3' UTR (NM_001281294, exon 3 of 3)	3559	NM_001281294	23528	Hs.59757	NM_012482	protein-coding
1	153952044	153952417	ENSG00000160741	ENSG00000198837	DENND4B	DENN domain containing 4B	0.0041	-	153952044	153952417	0	2	218,21,	0,352	-4.61	-5.49	0.431	exon (NM_181715, exon 10 of 14)	exon (NM_181715, exon 10 of 14)	-5513	NM_014856	9909	Hs.744878	NM_014856	protein-coding
1	24670114	24672190	ENSG00000133226	ENSG00000133226	SRRM1	serine and arginine repetitive matrix 1	7.6e-13	+	24670114	24672190	0	3	201,210,9,	0,1271,2067	-25.9	-27.9	0.432	intron (NM_001366594, intron 16 of 17)	MIR|SINE|MIR	27573	NM_001366597	10250	Hs.18192	NM_005839	protein-coding
1	86350236	86351913	ENSG00000122417	ENSG00000278281	MIR7856	microRNA 7856	0.03	-	86350236	86351913	0	1	1677,	0	-2.86	-3.52	0.436	3' UTR (NM_001366783, exon 17 of 17)	3' UTR (NM_001366783, exon 17 of 17)	6612	NR_107010	102465842		NR_107010	ncRNA
1	207358614	207359719	ENSG00000196352	ENSG00000196352	CD55	CD55 molecule (Cromer blood group)	0.15	+	207358614	207359719	0	2	7,174,	0,931	-1.48	-1.91	0.439	intron (NM_001300904, intron 10 of 10)	intron (NM_001300904, intron 10 of 10)	37489	NM_001300903	1604	Hs.126517	NM_000574	protein-coding
1	186417628	186419851	ENSG00000157181	ENSG00000229739	LOC102724919	uncharacterized LOC102724919	0.0081	+	186417628	186419851	0	2	26,843,	0,1380	-4	-4.81	0.44	intron (NM_001164246, intron 12 of 12)	intron (NM_001164246, intron 12 of 12)	-16421	NR_126002	102724919	Hs.576493	NR_126002	ncRNA
1	226154625	226154834	ENSG00000234478	ENSG00000234478	ACBD3-AS1	ACBD3 antisense RNA 1	0.1	+	226154625	226154834	0	1	209,	0	-1.79	-2.29	0.44	non-coding (NR_146443, exon 2 of 2)	non-coding (NR_146443, exon 2 of 2)	6727	NR_146443	107985353	Hs.735455	NR_146443	ncRNA
1	156036881	156037120	ENSG00000160803	ENSG00000163479	SSR2	signal sequence receptor subunit 2	0.032	-	156036881	156037120	0	1	239,	0	-2.79	-3.44	0.442	exon (NM_020131, exon 11 of 11)	exon (NM_020131, exon 11 of 11)	-16050	NM_003145	6746	Hs.74564	NM_003145	protein-coding
1	114396246	114396576	ENSG00000197323	ENSG00000197323	TRIM33	tripartite motif containing 33	0.0082	-	114396246	114396576	0	1	330,	0	-3.99	-4.8	0.443	3' UTR (NM_033020, exon 19 of 19)	3' UTR (NM_033020, exon 19 of 19)	114792	NM_033020	51592	Hs.26837	NM_015906	protein-coding
1	153773019	153773760	ENSG00000143624	ENSG00000143554	SLC27A3	solute carrier family 27 member 3	0.00023	+	153773019	153773760	0	2	62,568,	0,173	-7.27	-8.39	0.449	3' UTR (NM_023015, exon 30 of 30)	3' UTR (NM_023015, exon 30 of 30)	-2017	NR_145826	11000	Hs.438723	NM_024330	protein-coding
1	235449982	235454159	ENSG00000162885	ENSG00000162885	B3GALNT2	beta-1,3-N-acetylgalactosaminyltransferase 2	0.0079	-	235449982	235454159	0	3	358,57,4,	0,3107,4173	-4.02	-4.84	0.449	3' UTR (NM_003193, exon 17 of 17).2	3' UTR (NM_003193, exon 17 of 17).2	52381	NM_001277155	148789	Hs.498143	NM_152490	protein-coding
1	23873659	23874645	ENSG00000188822	ENSG00000179163	FUCA1	alpha-L-fucosidase 1	0.1	-	23873659	23874645	0	1	986,	0	-1.76	-2.26	0.45	3' UTR (NM_001841, exon 2 of 2)	3' UTR (NM_001841, exon 2 of 2)	-5783	NM_000147	2517	Hs.370858	NM_000147	protein-coding
1	119623686	119647773	ENSG00000143067	ENSG00000143067	ZNF697	zinc finger protein 697	0.17	-	119623686	119647773	0	3	430,263,83,	0,2188,24004	-1.36	-1.78	0.453	intron (NM_001080470, intron 1 of 2)	intron (NM_001080470, intron 1 of 2)	12536	NM_001080470	90874	Hs.381105	NM_001080470	protein-coding
1	236544830	236548306	ENSG00000116977	ENSG00000223776	LGALS8-AS1	LGALS8 antisense RNA 1	0.0037	+	236544830	236548306	0	3	85,40,295,	0,331,3181	-4.71	-5.6	0.464	intron (NM_201543, intron 10 of 10)	intron (NM_201543, intron 10 of 10)	-22060	NR_034040	100287902	Hs.677376	NR_034040	ncRNA
1	200553233	200554533	ENSG00000118193	ENSG00000118193	KIF14	kinesin family member 14	0.00027	-	200553233	200554533	0	2	534,66,	0,1234	-7.08	-8.2	0.467	intron (NM_014875, intron 29 of 29)	intron (NM_014875, intron 29 of 29)	64955	NM_001305792	9928	Hs.3104	NM_014875	protein-coding
1	12012435	12012795	ENSG00000116688	ENSG00000116691	MIIP	migration and invasion inhibitory protein	2e-05	+	12012435	12012795	0	1	360,	0	-9.46	-10.8	0.476	3' UTR (NM_014874, exon 19 of 19)	3' UTR (NM_014874, exon 19 of 19)	-6883	NM_021933	60672	Hs.8595	NM_021933	protein-coding
1	42265100	42315351	ENSG00000198815	ENSG00000198815	FOXJ3	forkhead box J3	0.0097	-	42265100	42315351	0	4	89,325,61,6,	0,13247,45949,50245	-3.85	-4.64	0.476	intron (NM_001198850, intron 2 of 12)	intron (NM_001198850, intron 2 of 12)	44729	NM_001198851	22887	Hs.26023	NM_014947	protein-coding
1	32853156	32856094	ENSG00000116497	ENSG00000160097	FNDC5	fibronectin type III domain containing 5	0.18	+	32853156	32856094	0	2	10,171,	0,2767	-1.33	-1.74	0.477	intron (NM_022753, intron 6 of 6)	L2|LINE|L2	16188	NM_001171940	252995	Hs.524234	NM_153756	protein-coding
1	15428645	15428974	ENSG00000142634	ENSG00000162438	CTRC	chymotrypsin C	1e-06	+	15428645	15428974	0	1	329,	0	-12.3	-13.8	0.48	3' UTR (NM_024329, exon 4 of 4)	3' UTR (NM_024329, exon 4 of 4)	-9633	NM_007272	11330	Hs.631869	NM_007272	protein-coding
1	236900389	236900539	ENSG00000116984	ENSG00000244020	MT1HL1	metallothionein 1H like 1	0.082	+	236900389	236900539	0	1	150,	0	-1.97	-2.5	0.481	3' UTR (NM_001291939, exon 32 of 32)	3' UTR (NM_001291939, exon 32 of 32)	103977	NM_001276687	645745	Hs.632513	NM_001039954	protein-coding
1	24839997	24841028	ENSG00000169504	ENSG00000278034	MIR6731	microRNA 6731	9.3e-10	+	24839997	24841028	0	2	44,256,	0,775	-19	-20.8	0.482	intron (NM_013943, intron 5 of 5)	intron (NM_013943, intron 5 of 5)	78903	NR_106789	102465437		NR_106789	ncRNA
1	26276670	26277462	ENSG00000130695	ENSG00000142669	SH3BGRL3	SH3 domain binding glutamate rich protein like 3	5.5e-05	+	26276670	26277462	0	2	90,330,	0,462	-8.57	-9.81	0.485	intron (NM_001319944, intron 13 of 13)	intron (NM_001319944, intron 13 of 13)	-3020	NM_031286	83442	Hs.109051	NM_031286	protein-coding
1	40290950	40292815	ENSG00000084073	ENSG00000049089	COL9A2	collagen type IX alpha 2 chain	0.003	+	40290950	40292815	0	2	47,371,	0,1494	-4.91	-5.81	0.488	intron (NM_005857, intron 9 of 9)	AluSx1|SINE|Alu	25403	NM_001852	1298	Hs.418012	NM_001852	protein-coding
1	155320455	155320666	ENSG00000160752	ENSG00000160753	RUSC1	RUN and SH3 domain containing 1	4.1e-05	+	155320455	155320666	0	1	211,	0	-8.85	-10.1	0.498	promoter-TSS (NM_001105203)	promoter-TSS (NM_001105203)	-333	NM_001105203	23623	Hs.226499	NM_014328	protein-coding
1	58659896	58661211	ENSG00000162601	ENSG00000162601	MYSM1	Myb like, SWIRM and MPN domains 1	0.0096	-	58659896	58661211	0	2	259,42,	0,1273	-3.86	-4.65	0.499	intron (NM_001085487, intron 19 of 19)	intron (NM_001085487, intron 19 of 19)	39508	NM_001085487	114803	Hs.744921	NM_001085487	protein-coding
1	27547336	27548266	ENSG00000126705	ENSG00000126705	AHDC1	AT-hook DNA binding motif containing 1	0.094	-	27547336	27548266	0	1	930,	0	-1.85	-2.36	0.5	exon (NM_001029882, exon 6 of 7)	exon (NM_001029882, exon 6 of 7)	55693	NM_001029882	27245	Hs.469280	NM_001029882	protein-coding
1	25832012	25832492	ENSG00000117640		LOC646471	uncharacterized LOC646471	0.0036	+	25832012	25832492	0	1	480,	0	-4.74	-5.63	0.503	3' UTR (NM_001099627, exon 7 of 7)	3' UTR (NM_001099627, exon 7 of 7)	-8646	NR_024498	646471	Hs.727271	NR_024498	ncRNA
1	145849327	145849656	ENSG00000131788	ENSG00000278549	MIR6736	microRNA 6736	0.016	-	145849327	145849656	0	1	329,	0	-3.42	-4.16	0.505	TTS (NM_001012758)	TTS (NM_001012758)	1153	NR_106794	102466191		NR_106794	ncRNA
1	225403054	225403383	ENSG00000143815	ENSG00000143815	LBR	lamin B receptor	5e-07	-	225403054	225403383	0	1	329,	0	-13	-14.5	0.506	3' UTR (NM_002296, exon 14 of 14)	3' UTR (NM_002296, exon 14 of 14)	24819	NM_002296	3930	Hs.435166	NM_002296	protein-coding
1	93360649	93360800	ENSG00000117505	ENSG00000117505	DR1	down-regulator of transcription 1	0.038	+	93360649	93360800	0	1	151,	0	-2.64	-3.27	0.511	3' UTR (NM_001938, exon 3 of 3)	3' UTR (NM_001938, exon 3 of 3)	14818	NM_001938	1810	Hs.348418	NM_001938	protein-coding
1	225846554	225847135	ENSG00000196187	ENSG00000143819	EPHX1	epoxide hydrolase 1	0.061	-	225846554	225847135	0	2	378,102,	0,479	-2.22	-2.79	0.512	3' UTR (NM_014698, exon 25 of 25)	3' UTR (NM_014698, exon 25 of 25)	21491	NM_000120	2052	Hs.89649	NM_000120	protein-coding
1	6525410	6526791	ENSG00000162408	ENSG00000171680	PLEKHG5	pleckstrin homology and RhoGEF domain containing G5	0.00032	-	6525410	6526791	0	2	593,96,	0,1285	-6.96	-8.06	0.517	intron (NM_024654, intron 11 of 11)	intron (NM_024654, intron 11 of 11)	-6040	NM_198681	57449	Hs.284232	NM_020631	protein-coding
1	75761584	75762811	ENSG00000117054		DLSTP1	dihydrolipoamide S-succinyltransferase pseudogene 1	0.039	+	75761584	75762811	0	2	31,120,	0,1107	-2.61	-3.24	0.525	intron (NM_001286042, intron 10 of 10)	intron (NM_001286042, intron 10 of 10)	-17185	NR_130749	1744	Hs.525459	NR_130749	pseudo
1	90027420	90027630	ENSG00000162664	ENSG00000162664	ZNF326	zinc finger protein 326	0.0081	+	90027420	90027630	0	1	210,	0	-4.01	-4.82	0.527	exon (NM_182976, exon 12 of 12)	exon (NM_182976, exon 12 of 12)	32415	NM_182976	284695	Hs.306221	NM_181781	protein-coding
1	173824777	173825318	ENSG00000117593	ENSG00000117593	DARS2	aspartyl-tRNA synthetase 2, mitochondrial	0.0084	+	173824777	173825318	0	1	541,	0	-3.97	-4.78	0.527	promoter-TSS (NM_001127181)	promoter-TSS (NM_001127181)	375	NM_018122	55157	Hs.647707	NM_018122	protein-coding
1	151266954	151267479	ENSG00000159352	ENSG00000159352	PSMD4	proteasome 26S subunit, non-ATPase 4	3.5e-15	+	151266954	151267479	0	2	24,307,	0,218	-31.1	-33.3	0.529	exon (NM_002810, exon 10 of 10)	exon (NM_002810, exon 10 of 10)	12483	NM_001330692	5710	Hs.505059	NM_002810	protein-coding
1	219987203	219987293	ENSG00000136628	ENSG00000196660	SLC30A10	solute carrier family 30 member 10	0.00024	-	219987203	219987293	0	1	90,	0	-7.21	-8.33	0.531	exon (NM_004446, exon 20 of 32)	exon (NM_004446, exon 20 of 32)	-58597	NR_046437	55532	Hs.284450	NM_018713	protein-coding
1	27550811	27551800	ENSG00000126705	ENSG00000126705	AHDC1	AT-hook DNA binding motif containing 1	0.059	-	27550811	27551800	0	1	989,	0	-2.25	-2.83	0.535	exon (NM_001029882, exon 6 of 7)	exon (NM_001029882, exon 6 of 7)	52188	NM_001029882	27245	Hs.469280	NM_001029882	protein-coding
1	205977877	205978747	ENSG00000276600	ENSG00000276600	RAB7B	RAB7B, member RAS oncogene family	0.043	-	205977877	205978747	0	1	870,	0	-2.53	-3.15	0.539	TTS (NR_110984)	TTS (NR_110984)	16127	NM_177403	338382	Hs.534612	NM_177403	protein-coding
1	46678300	46683245	ENSG00000159658	ENSG00000228237	EFCAB14-AS1	EFCAB14 antisense RNA 1	6.6e-05	-	46678300	46683245	0	2	336,24,	0,4921	-8.41	-9.63	0.543	intron (NM_014774, intron 10 of 10)	intron (NM_014774, intron 10 of 10)	6737	NR_038827	100130197	Hs.568643	NR_038827	ncRNA
1	42682426	42682575	ENSG00000065978	ENSG00000065978	YBX1	Y-box binding protein 1	1.8e-05	+	42682426	42682575	0	1	149,	0	-9.63	-10.9	0.547	promoter-TSS (NM_004559)	promoter-TSS (NM_004559)	83	NM_004559	4904	Hs.473583	NM_004559	protein-coding
1	75761345	75761526	ENSG00000117054		DLSTP1	dihydrolipoamide S-succinyltransferase pseudogene 1	1e-07	+	75761345	75761526	0	1	181,	0	-14.5	-16.1	0.557	intron (NM_001286042, intron 10 of 10)	intron (NM_001286042, intron 10 of 10)	-16423	NR_130749	1744	Hs.525459	NR_130749	pseudo
1	145096538	145096779	ENSG00000215784	ENSG00000263513	FAM72C	family with sequence similarity 72 member C	0.01	+	145096538	145096779	0	1	241,	0	-3.82	-4.6	0.562	5' UTR (NM_001346068, exon 1 of 4).2	5' UTR (NM_001346068, exon 1 of 4).2	676	NM_001346071	554282		NM_001287385	protein-coding
1	203796282	203796612	ENSG00000257315	ENSG00000058673	ZC3H11A	zinc finger CCCH-type containing 11A	5.6e-06	+	203796282	203796612	0	1	330,	0	-10.8	-12.1	0.564	5' UTR (NM_001319238, exon 2 of 20)	5' UTR (NM_001319238, exon 2 of 20)	910	NM_001350264	9877	Hs.532399	NM_014827	protein-coding
1	84235327	84235418	ENSG00000142875	ENSG00000142875	PRKACB	protein kinase cAMP-activated catalytic subunit beta	0.13	+	84235327	84235418	0	1	91,	0	-1.6	-2.07	0.575	3' UTR (NM_001242859, exon 12 of 12)	3' UTR (NM_001242859, exon 12 of 12)	53741	NM_001242862	5567	Hs.487325	NM_002731	protein-coding
1	205169193	205173058	ENSG00000133059	ENSG00000133059	DSTYK	dual serine/threonine and tyrosine protein kinase	0.094	-	205169193	205173058	0	2	639,22,	0,3843	-1.85	-2.36	0.576	intron (NM_199462, intron 2 of 11)	MLT1J|LTR|ERVL-MaLR	40576	NM_015375	25778	Hs.6874	NM_015375	protein-coding
1	27822335	27822485	ENSG00000117758	ENSG00000117751	PPP1R8	protein phosphatase 1 regulatory subunit 8	0.18	+	27822335	27822485	0	1	150,	0	-1.3	-1.7	0.577	3' UTR (NM_177424, exon 9 of 9)	3' UTR (NM_177424, exon 9 of 9)	-8372	NM_138558	5511	Hs.533474	NM_002713	protein-coding
1	193091105	193091496	ENSG00000023572	ENSG00000023572	GLRX2	glutaredoxin 2	0.00028	-	193091105	193091496	0	1	391,	0	-7.08	-8.19	0.578	TTS (NM_001331020)	TTS (NM_001331020)	14177	NM_197962	51022	Hs.458283	NM_016066	protein-coding
1	37682797	37683157	ENSG00000116922	ENSG00000116922	C1orf109	chromosome 1 open reading frame 109	0.039	-	37682797	37683157	0	1	360,	0	-2.61	-3.24	0.58	3' UTR (NM_001350755, exon 5 of 5)	3' UTR (NM_001350755, exon 5 of 5)	7552	NM_001350756	54955	Hs.272673	NM_017850	protein-coding
1	27549583	27550482	ENSG00000126705	ENSG00000126705	AHDC1	AT-hook DNA binding motif containing 1	0.066	-	27549583	27550482	0	1	899,	0	-2.15	-2.72	0.581	exon (NM_001029882, exon 6 of 7)	exon (NM_001029882, exon 6 of 7)	53461	NM_001029882	27245	Hs.469280	NM_001029882	protein-coding
1	629118	629433	ENSG00000225972	ENSG00000230021	LOC101928626	uncharacterized LOC101928626	6.9e-10	+	629118	629433	0	1	315,	0	-19.3	-21.1	0.585	promoter-TSS (NR_125957)	promoter-TSS (NR_125957)	-267	NR_125957	101928626	Hs.637667	NR_125957	ncRNA
1	235450013	235450434	ENSG00000284770	ENSG00000162885	B3GALNT2	beta-1,3-N-acetylgalactosaminyltransferase 2	0.0011	+	235450013	235450434	0	1	421,	0	-5.85	-6.85	0.585	exon (NM_152490, exon 12 of 12)	exon (NM_152490, exon 12 of 12)	54228	NM_001277155	148789	Hs.498143	NM_152490	protein-coding
1	23084082	23084473	ENSG00000169641	ENSG00000263793	MIR3115	microRNA 3115	0.12	-	23084082	23084473	0	1	391,	0	-1.67	-2.15	0.589	TTS (NM_001009999)	TTS (NM_001009999)	39973	NR_036057	100422866		NR_036057	ncRNA
1	180950024	180950954	ENSG00000135835	ENSG00000232586	KIAA1614-AS1	KIAA1614 antisense RNA 1	0.14	+	180950024	180950954	0	1	930,	0	-1.52	-1.97	0.596	non-coding (NR_145481, exon 2 of 2)	non-coding (NR_145481, exon 2 of 2)	4398	NR_145481	103344928	Hs.665319	NR_145481	ncRNA
1	9984363	9984663	ENSG00000173614	ENSG00000162444	RBP7	retinol binding protein 7	0.17	+	9984363	9984663	0	1	300,	0	-1.35	-1.77	0.597	3' UTR (NM_022787, exon 5 of 5)	3' UTR (NM_022787, exon 5 of 5)	-12715	NM_052960	116362	Hs.422688	NM_052960	protein-coding
1	211312438	211312941	ENSG00000117625	ENSG00000082512	TRAF5	TNF receptor associated factor 5	1.1e-06	+	211312438	211312941	0	2	49,222,	0,281	-12.3	-13.7	0.6	intron (NR_146433, intron 11 of 12)	intron (NR_146433, intron 11 of 12)	-13925	NM_004619	7188	Hs.523930	NM_004619	protein-coding
1	243504387	243504868	ENSG00000117020	ENSG00000265201	MIR4677	microRNA 4677	0.051	-	243504387	243504868	0	1	481,	0	-2.38	-2.98	0.605	3' UTR (NM_005465, exon 14 of 14).2	3' UTR (NM_005465, exon 14 of 14).2	158452	NR_039824	100616343		NR_039824	ncRNA
1	211314470	211314651	ENSG00000117625	ENSG00000082512	TRAF5	TNF receptor associated factor 5	0.028	+	211314470	211314651	0	1	181,	0	-2.9	-3.57	0.616	non-coding (NR_146432, exon 13 of 13)	non-coding (NR_146432, exon 13 of 13)	-12054	NM_004619	7188	Hs.523930	NM_004619	protein-coding
1	243124697	243124937	ENSG00000143702	ENSG00000214837	LINC01347	long intergenic non-protein coding RNA 1347	0.00016	-	243124697	243124937	0	1	240,	0	-7.61	-8.77	0.617	3' UTR (NM_001042405, exon 19 of 19)	3' UTR (NM_001042405, exon 19 of 19)	-23073	NR_029401	731275	Hs.722350	NR_029401	ncRNA
1	235738004	235738750	ENSG00000235674	ENSG00000168243	GNG4	G protein subunit gamma 4	0.0031	+	235738004	235738750	0	1	746,	0	-4.87	-5.77	0.62	intron (NM_000081, intron 31 of 52)	intron (NM_000081, intron 31 of 52)	-87623	NM_001098721	2786	Hs.159711	NM_004485	protein-coding
1	180950028	180954707	ENSG00000232586	ENSG00000232586	KIAA1614-AS1	KIAA1614 antisense RNA 1	0.12	-	180950028	180954707	0	2	890,40,	0,4639	-1.62	-2.08	0.621	TTS (NM_020950)	TTS (NM_020950)	2519	NR_145481	103344928	Hs.665319	NR_145481	ncRNA
1	212360816	212360967	ENSG00000066027	ENSG00000201544	SNORA16B	small nucleolar RNA, H/ACA box 16B	0.0074	+	212360816	212360967	0	1	151,	0	-4.08	-4.91	0.626	3' UTR (NM_001199756, exon 13 of 13)	3' UTR (NM_001199756, exon 13 of 13)	8074	NR_004389	692157	Hs.707958	NR_004389	snoRNA
1	3889721	3889990	ENSG00000198912	ENSG00000198912	C1orf174	chromosome 1 open reading frame 174	0.002	-	3889721	3889990	0	1	269,	0	-5.29	-6.23	0.628	3' UTR (NM_207356, exon 4 of 4)	3' UTR (NM_207356, exon 4 of 4)	10416	NM_207356	339448	Hs.103939	NM_207356	protein-coding
1	150511492	150511823	ENSG00000143369	ENSG00000143369	ECM1	extracellular matrix protein 1	0.015	+	150511492	150511823	0	1	331,	0	-3.43	-4.17	0.635	exon (NM_004425, exon 7 of 10)	exon (NM_004425, exon 7 of 10)	3549	NM_004425	1893	Hs.81071	NM_004425	protein-coding
1	23090853	23091655	ENSG00000169641	ENSG00000263793	MIR3115	microRNA 3115	0.027	-	23090853	23091655	0	2	45,466,	0,336	-2.95	-3.63	0.636	exon (NM_033631, exon 4 of 5)	exon (NM_033631, exon 4 of 5)	46949	NR_036057	100422866		NR_036057	ncRNA
1	23091774	23092015	ENSG00000169641	ENSG00000263793	MIR3115	microRNA 3115	0.13	-	23091774	23092015	0	1	241,	0	-1.6	-2.06	0.638	exon (NM_033631, exon 4 of 5)	exon (NM_033631, exon 4 of 5)	47590	NR_036057	100422866		NR_036057	ncRNA
1	116989758	116990118	ENSG00000134247	ENSG00000134256	CD101	CD101 molecule	0.036	+	116989758	116990118	0	1	360,	0	-2.69	-3.33	0.645	3' UTR (NM_020440, exon 9 of 9)	3' UTR (NM_020440, exon 9 of 9)	-11812	NM_004258	9398	Hs.654598	NM_004258	protein-coding
1	1292705	1292945	ENSG00000131584	ENSG00000278073	MIR6726	microRNA 6726	0.14	-	1292705	1292945	0	1	240,	0	-1.5	-1.94	0.646	TTS (NR_037668)	TTS (NR_037668)	3345	NR_106784	102465434		NR_106784	ncRNA
1	63437008	63437248	ENSG00000088035	ENSG00000088035	ALG6	ALG6 alpha-1,3-glucosyltransferase	0.047	+	63437008	63437248	0	1	240,	0	-2.44	-3.05	0.65	3' UTR (NM_013339, exon 15 of 15)	3' UTR (NM_013339, exon 15 of 15)	69501	NM_013339	29929	Hs.258501	NM_013339	protein-coding
1	25831967	25832134	ENSG00000272478		LOC646471	uncharacterized LOC646471	0.17	-	25831967	25832134	0	1	167,	0	-1.38	-1.8	0.658	3' UTR (NM_001099627, exon 7 of 7)	3' UTR (NM_001099627, exon 7 of 7)	-8445	NR_024498	646471	Hs.727271	NR_024498	ncRNA
1	232464879	232471404	ENSG00000116991	ENSG00000116991	SIPA1L2	signal induced proliferation associated 1 like 2	0.12	-	232464879	232471404	0	2	537,34,	0,6491	-1.63	-2.1	0.665	intron (NM_020808, intron 6 of 20)	L4_A_Mam|LINE|RTE-X	47466	NM_020808	57568	Hs.745009	NM_020808	protein-coding
1	27350757	27351026	ENSG00000142765	ENSG00000142765	SYTL1	synaptotagmin like 1	4.6e-06	+	27350757	27351026	0	1	269,	0	-10.9	-12.3	0.666	exon (NM_001193308, exon 11 of 15)	exon (NM_001193308, exon 11 of 15)	8870	NM_001193308	84958	Hs.469175	NM_032872	protein-coding
1	184791022	184791352	ENSG00000135842	ENSG00000116406	EDEM3	ER degradation enhancing alpha-mannosidase like protein 3	0.00013	-	184791022	184791352	0	1	330,	0	-7.77	-8.94	0.666	3' UTR (NM_052966, exon 14 of 14)	3' UTR (NM_052966, exon 14 of 14)	-36329	NR_135118	80267	Hs.523811	NM_025191	protein-coding
1	193091105	193091777	ENSG00000116747	ENSG00000023572	GLRX2	glutaredoxin 2	0.0057	+	193091105	193091777	0	2	114,127,	0,545	-4.31	-5.16	0.677	TTS (NM_001331020)	TTS (NM_001331020)	14037	NM_197962	51022	Hs.458283	NM_016066	protein-coding
1	93239425	93256431	ENSG00000122483	ENSG00000122483	CCDC18	coiled-coil domain containing 18	5.6e-11	+	93239425	93256431	0	6	48,214,100,117,144,97,	0,257,6679,7412,15045,16909	-21.7	-23.6	0.68	intron (NM_001306076, intron 23 of 28)	L1M1|LINE|L1	67212	NM_206886	343099	Hs.482873	NM_206886	protein-coding
1	200973319	200973560	ENSG00000116852	ENSG00000233217	MROH3P	maestro heat like repeat family member 3, pseudogene	0.00012	-	200973319	200973560	0	1	241,	0	-7.86	-9.04	0.682	3' UTR (NM_001252100, exon 35 of 35)	3' UTR (NM_001252100, exon 35 of 35)	44496	NR_147176	647215	Hs.576504	NR_147176	pseudo
1	93205545	93207381	ENSG00000122483	ENSG00000122483	CCDC18	coiled-coil domain containing 18	0.00021	+	93205545	93207381	0	2	86,275,	0,1561	-7.35	-8.49	0.683	intron (NM_001306076, intron 8 of 28)	Kanga1b|DNA|TcMar-Tc2	25747	NM_206886	343099	Hs.482873	NM_206886	protein-coding
1	1292375	1292616	ENSG00000131584	ENSG00000278073	MIR6726	microRNA 6726	0.16	-	1292375	1292616	0	1	241,	0	-1.42	-1.85	0.692	TTS (NR_037668)	TTS (NR_037668)	3674	NR_106784	102465434		NR_106784	ncRNA
1	9984364	9984568	ENSG00000241326	ENSG00000162444	RBP7	retinol binding protein 7	0.17	+	9984364	9984568	0	1	204,	0	-1.38	-1.8	0.696	3' UTR (NM_022787, exon 5 of 5)	3' UTR (NM_022787, exon 5 of 5)	-12762	NM_052960	116362	Hs.422688	NM_052960	protein-coding
1	202580987	202581258	ENSG00000077157	ENSG00000077157	PPP1R12B	protein phosphatase 1 regulatory subunit 12B	0.016	+	202580987	202581258	0	1	271,	0	-3.41	-4.14	0.698	3' UTR (NM_001197131, exon 7 of 7)	3' UTR (NM_001197131, exon 7 of 7)	41009	NM_001197131	4660	Hs.444403	NM_002481	protein-coding
1	1645156	1645779	ENSG00000248333	ENSG00000215914	MMP23A	matrix metallopeptidase 23A (pseudogene)	0.031	-	1645156	1645779	0	4	148,49,65,7,	0,303,422,616	-2.81	-3.47	0.708	intron (NM_001787, intron 5 of 19)	AluSg|SINE|Alu	12688	NR_002946	8511	Hs.671760	NR_002946	pseudo
1	235662689	235663985	ENSG00000143669	ENSG00000168243	GNG4	G protein subunit gamma 4	5.1e-15	-	235662689	235663985	0	2	389,2,	0,1294	-30.7	-32.9	0.713	intron (NM_000081, intron 52 of 52)	intron (NM_000081, intron 52 of 52)	-12583	NM_001098721	2786	Hs.159711	NM_004485	protein-coding
1	36473218	36473399	ENSG00000119535	ENSG00000116898	MRPS15	mitochondrial ribosomal protein S15	0.13	-	36473218	36473399	0	1	181,	0	-1.59	-2.05	0.714	intron (NM_156039, intron 6 of 16)	(TCTCTG)n|Simple_repeat|Simple_repeat	-8925	NM_031280	64960	Hs.352839	NM_031280	protein-coding
1	223775509	223775779	ENSG00000162909	ENSG00000162909	CAPN2	calpain 2	1.2e-08	+	223775509	223775779	0	1	270,	0	-16.5	-18.2	0.714	3' UTR (NM_001748, exon 21 of 21)	3' UTR (NM_001748, exon 21 of 21)	63105	NM_001748	824	Hs.350899	NM_001748	protein-coding
1	173933161	173933342	ENSG00000135870	ENSG00000117601	SERPINC1	serpin family C member 1	0.047	-	173933161	173933342	0	1	181,	0	-2.45	-3.06	0.715	3' UTR (NM_172071, exon 19 of 19)	3' UTR (NM_172071, exon 19 of 19)	-15874	NM_000488	462	Hs.75599	NM_000488	protein-coding
1	45628292	45628353	ENSG00000159592	ENSG00000159588	CCDC17	coiled-coil domain containing 17	0.00026	-	45628292	45628353	0	1	61,	0	-7.15	-8.26	0.726	exon (NM_021639, exon 13 of 13)	exon (NM_021639, exon 13 of 13)	-4269	NM_001190182	149483	Hs.18912	NM_152500	protein-coding
1	182579476	182579985	ENSG00000135828	ENSG00000135828	RNASEL	ribonuclease L	0.13	-	182579476	182579985	0	1	509,	0	-1.6	-2.06	0.727	intron (NM_021133, intron 5 of 6)	MIR3|SINE|MIR	9525	NM_021133	6041	Hs.518545	NM_021133	protein-coding
1	145772679	145773309	ENSG00000265491	ENSG00000265491	RNF115	ring finger protein 115	0.01	-	145772679	145773309	0	1	630,	0	-3.79	-4.58	0.73	intron (NM_014455, intron 3 of 8)	L1M4|LINE|L1	51101	NM_014455	27246	Hs.523550	NM_014455	protein-coding
1	15932175	15933044	ENSG00000065526	ENSG00000116809	ZBTB17	zinc finger and BTB domain containing 17	1.3e-09	+	15932175	15933044	0	1	869,	0	-18.7	-20.5	0.739	exon (NM_015001, exon 11 of 15)	exon (NM_015001, exon 11 of 15)	43522	NM_001287603	7709	Hs.433764	NM_003443	protein-coding
1	198320891	198321012	ENSG00000151414	ENSG00000151414	NEK7	NIMA related kinase 7	0.041	+	198320891	198321012	0	1	121,	0	-2.57	-3.2	0.754	3' UTR (NM_133494, exon 10 of 10)	3' UTR (NM_133494, exon 10 of 10)	163954	NM_133494	140609	Hs.24119	NM_133494	protein-coding
1	198694358	198694779	ENSG00000081237	ENSG00000081237	PTPRC	protein tyrosine phosphatase receptor type C	0.0089	+	198694358	198694779	0	1	421,	0	-3.91	-4.72	0.758	3' UTR (NM_001267798, exon 4 of 4)	3' UTR (NM_001267798, exon 4 of 4)	55529	NM_001267798	5788	Hs.654514	NM_002838	protein-coding
1	144887774	144888285	ENSG00000196369		LSP1P5	LSP1 pseudogene 5	0.069	-	144887774	144888285	0	1	511,	0	-2.12	-2.68	0.761	3' UTR (NM_001368324, exon 11 of 11)	3' UTR (NM_001368324, exon 11 of 11)	169859	NR_027354	645166	Hs.744183	NR_027354	pseudo
1	175987007	175987097	ENSG00000143207	ENSG00000252906	SCARNA3	small Cajal body-specific RNA 3	0.026	-	175987007	175987097	0	1	90,	0	-2.97	-3.65	0.765	exon (NM_001001740, exon 17 of 19)	exon (NM_001001740, exon 17 of 19)	-18512	NR_002998	677679		NR_002998	ncRNA
1	231351395	231351756	ENSG00000010072	ENSG00000010072	SPRTN	SprT-like N-terminal domain	0.0018	+	231351395	231351756	0	1	361,	0	-5.38	-6.34	0.772	exon (NM_001010984, exon 4 of 4)	exon (NM_001010984, exon 4 of 4)	13283	NM_001010984	83932	Hs.554892	NM_032018	protein-coding
1	157123166	157123556	ENSG00000117036	ENSG00000235700	CYCSP52	CYCS pseudogene 52	0.0021	-	157123166	157123556	0	1	390,	0	-5.24	-6.18	0.776	3' UTR (NM_001145312, exon 5 of 5)	3' UTR (NM_001145312, exon 5 of 5)	-5001	NR_001560	360155	Hs.491808	NR_001560	pseudo
1	203796331	203796602	ENSG00000058673	ENSG00000058673	ZC3H11A	zinc finger CCCH-type containing 11A	3.8e-09	+	203796331	203796602	0	1	271,	0	-17.6	-19.4	0.783	5' UTR (NM_001350262, exon 2 of 20)	5' UTR (NM_001350262, exon 2 of 20)	930	NM_001350264	9877	Hs.532399	NM_014827	protein-coding
1	3814775	3815494	ENSG00000116198	ENSG00000130764	LRRC47	leucine rich repeat containing 47	0.0027	-	3814775	3815494	0	1	719,	0	-5.01	-5.92	0.788	3' UTR (NM_014704, exon 22 of 22)	3' UTR (NM_014704, exon 22 of 22)	-18637	NM_020710	57470	Hs.268488	NM_020710	protein-coding
1	160544628	160545108	ENSG00000066294	ENSG00000162739	SLAMF6	SLAM family member 6	0.048	-	160544628	160545108	0	1	480,	0	-2.42	-3.03	0.791	3' UTR (NM_001184879, exon 8 of 8)	3' UTR (NM_001184879, exon 8 of 8)	-21613	NM_052931	114836	Hs.492348	NM_052931	protein-coding
1	173938435	173941305	ENSG00000135870	ENSG00000117601	SERPINC1	serpin family C member 1	2e-06	-	173938435	173941305	0	2	439,41,	0,2829	-11.6	-13.1	0.793	intron (NM_001300851, intron 18 of 18)	intron (NM_001300851, intron 18 of 18)	-22492	NM_000488	462	Hs.75599	NM_000488	protein-coding
1	179863829	179863980	ENSG00000169905	ENSG00000169905	TOR1AIP2	torsin 1A interacting protein 2	0.002	-	179863829	179863980	0	1	151,	0	-5.28	-6.22	0.798	3' UTR (NM_001349933, exon 2 of 2)	3' UTR (NM_001349933, exon 2 of 2)	4935	NM_001349933	163590	Hs.571797	NM_022347	protein-coding
1	149848360	149848631	ENSG00000261716	ENSG00000261716	HIST2H2BC	histone cluster 2 H2B family member c (pseudogene)	0.025	-	149848360	149848631	0	1	271,	0	-3	-3.68	0.811	Intergenic	Intergenic	2277	NR_036461	337873	Hs.666643	NR_036461	pseudo
1	11925562	11925772	ENSG00000116685	ENSG00000116685	KIAA2013	KIAA2013	0.074	-	11925562	11925772	0	1	210,	0	-2.07	-2.61	0.817	exon (NM_138346, exon 1 of 3)	exon (NM_138346, exon 1 of 3)	760	NM_138346	90231	Hs.520094	NM_138346	protein-coding
1	20744274	20745022	ENSG00000127483	ENSG00000189410	SH2D5	SH2 domain containing 5	1.4e-64	-	20744274	20745022	0	1	748,	0	-144	-147	0.819	3' UTR (NM_016287, exon 13 of 13)	3' UTR (NM_016287, exon 13 of 13)	-11945	NM_001103160	400745	Hs.591522	NM_001103160	protein-coding
1	100085144	100085205	ENSG00000156876	ENSG00000156875	MFSD14A	major facilitator superfamily domain containing 14A	0.087	-	100085144	100085205	0	1	61,	0	-1.92	-2.44	0.819	3' UTR (NM_194292, exon 17 of 17)	3' UTR (NM_194292, exon 17 of 17)	47080	NM_033055	64645	Hs.124156	NM_033055	protein-coding
1	202584464	202584644	ENSG00000077157	ENSG00000077157	PPP1R12B	protein phosphatase 1 regulatory subunit 12B	0.13	+	202584464	202584644	0	1	180,	0	-1.6	-2.06	0.819	3' UTR (NM_001197131, exon 7 of 7)	3' UTR (NM_001197131, exon 7 of 7)	44440	NM_001197131	4660	Hs.444403	NM_002481	protein-coding
1	222731505	222732706	ENSG00000162819	ENSG00000197520	FAM177B	family with sequence similarity 177 member B	2.8e-06	+	222731505	222732706	0	2	11,79,	0,1122	-11.4	-12.8	0.82	intron (NM_144695, intron 12 of 12)	intron (NM_144695, intron 12 of 12)	-5110	NR_136691	400823	Hs.697608	NM_207468	protein-coding
1	161604945	161605662	ENSG00000244682		HSPA7	heat shock protein family A (Hsp70) member 7	0.02	+	161604945	161605662	0	1	717,	0	-3.21	-3.92	0.821	promoter-TSS (NR_024151)	promoter-TSS (NR_024151)	-755	NR_024151	3311	Hs.662180	NR_024151	pseudo
1	185298152	185298568	ENSG00000116679	ENSG00000116679	IVNS1ABP	influenza virus NS1A binding protein	1e-07	-	185298152	185298568	0	2	136,164,	0,252	-14.5	-16.1	0.823	intron (NM_006469, intron 14 of 14)	intron (NM_006469, intron 14 of 14)	18883	NM_006469	10625	Hs.497183	NM_006469	protein-coding
1	25831942	25834146	ENSG00000127423		LOC646471	uncharacterized LOC646471	0.0042	-	25831942	25834146	0	2	216,141,	0,2063	-4.6	-5.47	0.835	TTS (NM_001099627)	TTS (NM_001099627)	-9438	NR_024498	646471	Hs.727271	NR_024498	ncRNA
1	39347035	39347186	ENSG00000127603	ENSG00000127603	KIAA0754	KIAA0754	0.14	+	39347035	39347186	0	1	151,	0	-1.51	-1.95	0.836	intron (NM_012090, intron 35 of 92)	intron (NM_012090, intron 35 of 92)	-61962	NM_015038	643314	Hs.658760	NM_015038	protein-coding
1	109313787	109314028	ENSG00000134243	ENSG00000221986	MYBPHL	myosin binding protein H like	0.031	-	109313787	109314028	0	1	241,	0	-2.81	-3.47	0.839	3' UTR (NM_002959, exon 20 of 20)	3' UTR (NM_002959, exon 20 of 20)	-6897	NM_001265613	343263	Hs.443402	NM_001010985	protein-coding
1	223770112	223770293	ENSG00000162909	ENSG00000162909	CAPN2	calpain 2	0.12	+	223770112	223770293	0	1	181,	0	-1.65	-2.12	0.846	intron (NM_001146068, intron 17 of 20)	intron (NM_001146068, intron 17 of 20)	57664	NM_001748	824	Hs.350899	NM_001748	protein-coding
1	243504087	243504208	ENSG00000117020	ENSG00000265201	MIR4677	microRNA 4677	0.13	-	243504087	243504208	0	1	121,	0	-1.56	-2.02	0.846	3' UTR (NM_005465, exon 14 of 14).2	3' UTR (NM_005465, exon 14 of 14).2	157972	NR_039824	100616343		NR_039824	ncRNA
1	100188477	100188808	ENSG00000137992	ENSG00000122477	LRRC39	leucine rich repeat containing 39	0.053	-	100188477	100188808	0	1	331,	0	-2.35	-2.94	0.851	3' UTR (NM_001918, exon 11 of 11)	3' UTR (NM_001918, exon 11 of 11)	-10370	NM_001256386	127495	Hs.44277	NM_144620	protein-coding
1	220150540	220150721	ENSG00000118873	ENSG00000207624	MIR194-1	microRNA 194-1	0.00088	-	220150540	220150721	0	1	181,	0	-6.01	-7.03	0.869	3' UTR (NM_012414, exon 35 of 35)	3' UTR (NM_012414, exon 35 of 35)	-32390	NR_029711	406969		NR_029711	ncRNA
1	35749753	35751491	ENSG00000092853	ENSG00000092853	CLSPN	claspin	2.3e-07	-	35749753	35751491	0	2	58,242,	0,1496	-13.8	-15.3	0.871	intron (NM_001190481, intron 9 of 23)	AluSx|SINE|Alu	19356	NM_001330490	63967	Hs.175613	NM_022111	protein-coding
1	171592312	171592462	ENSG00000117523		MYOCOS	myocilin opposite strand	6.8e-09	+	171592312	171592462	0	1	150,	0	-17.1	-18.8	0.876	3' UTR (NM_015172, exon 34 of 34)	3' UTR (NM_015172, exon 34 of 34)	-27376	NM_001368164	110806290		NM_001368164	protein-coding
1	197158618	197158918	ENSG00000177888	ENSG00000066279	ASPM	abnormal spindle microtubule assembly	0.17	-	197158618	197158918	0	1	300,	0	-1.38	-1.8	0.88	non-coding (NR_135153, exon 11 of 11)	non-coding (NR_135153, exon 11 of 11)	-12074	NM_001206846	259266	Hs.121028	NM_018136	protein-coding
1	35919731	35920032	ENSG00000092847	ENSG00000126070	AGO3	argonaute RISC catalytic component 3	0.0081	+	35919731	35920032	0	1	301,	0	-4	-4.81	0.888	3' UTR (NM_012199, exon 19 of 19)	3' UTR (NM_012199, exon 19 of 19)	-11223	NM_024852	192669	Hs.657659	NM_024852	protein-coding
1	27350428	27350638	ENSG00000142765	ENSG00000142765	SYTL1	synaptotagmin like 1	8.3e-06	+	27350428	27350638	0	1	210,	0	-10.4	-11.7	0.898	intron (NM_032872, intron 10 of 14)	CpG-732	8511	NM_001193308	84958	Hs.469175	NM_032872	protein-coding
1	15931756	15931996	ENSG00000065526	ENSG00000116809	ZBTB17	zinc finger and BTB domain containing 17	1.7e-05	+	15931756	15931996	0	1	240,	0	-9.65	-11	0.9	exon (NM_015001, exon 11 of 15)	exon (NM_015001, exon 11 of 15)	44256	NM_001287603	7709	Hs.433764	NM_003443	protein-coding
1	243125895	243128455	ENSG00000143702	ENSG00000214837	LINC01347	long intergenic non-protein coding RNA 1347	5.2e-18	-	243125895	243128455	0	2	843,207,	0,2353	-37.5	-39.8	0.902	intron (NM_014812, intron 19 of 19)	intron (NM_014812, intron 19 of 19)	-25431	NR_029401	731275	Hs.722350	NR_029401	ncRNA
1	100107990	100119110	ENSG00000156876	ENSG00000156876	SASS6	SAS-6 centriolar assembly protein	3.1e-10	-	100107990	100119110	0	3	14,192,93,	0,2301,11027	-20	-21.9	0.916	intron (NM_001304829, intron 6 of 15)	AluY|SINE|Alu	19380	NM_001304829	163786	Hs.591447	NM_194292	protein-coding
1	156646564	156646798	ENSG00000229953	ENSG00000132692	BCAN	brevican	0.13	-	156646564	156646798	0	1	234,	0	-1.58	-2.04	0.952	intron (NM_021948, intron 2 of 13)	intron (NM_021948, intron 2 of 13)	4564	NM_021948	63827	Hs.516904	NM_021948	protein-coding
1	149849379	149849619	ENSG00000261716	ENSG00000261716	HIST2H2BC	histone cluster 2 H2B family member c (pseudogene)	0.019	-	149849379	149849619	0	1	240,	0	-3.25	-3.97	0.974	TTS (NR_036461)	TTS (NR_036461)	1274	NR_036461	337873	Hs.666643	NR_036461	pseudo
1	229323281	229323492	ENSG00000154429	ENSG00000213029	SPHAR	S-phase response (cyclin related)	9.2e-07	-	229323281	229323492	0	1	211,	0	-12.4	-13.9	0.981	3' UTR (NM_145257, exon 4 of 4)	3' UTR (NM_145257, exon 4 of 4)	19005	NM_006542	10638	Hs.296169	NM_006542	protein-coding
1	32167293	32170029	ENSG00000025800	ENSG00000084652	TXLNA	taxilin alpha	0.00014	+	32167293	32170029	0	2	3,148,	0,2588	-7.74	-8.91	0.997	intron (NM_012316, intron 12 of 13)	intron (NM_012316, intron 12 of 13)	-11014	NM_175852	200081	Hs.17987	NM_175852	protein-coding
1	21823053	21823384	ENSG00000142798	ENSG00000187942	LDLRAD2	low density lipoprotein receptor class A domain containing 2	0.059	-	21823053	21823384	0	1	331,	0	-2.25	-2.83	0.998	3' UTR (NM_001291860, exon 97 of 97)	3' UTR (NM_001291860, exon 97 of 97)	10954	NM_001013693	401944	Hs.745158	NM_001013693	protein-coding
1	227677233	227677443	ENSG00000181450		ZNF847P	zinc finger protein 847, pseudogene	0.13	+	227677233	227677443	0	1	210,	0	-1.59	-2.05	1	non-coding (NR_102302, exon 6 of 6)	non-coding (NR_102302, exon 6 of 6)	20369	NR_036753	401983	Hs.681816	NR_036753	pseudo
1	52821448	52821658	ENSG00000162378	ENSG00000203995	ZYG11A	zyg-11 family member A, cell cycle regulator	0.048	+	52821448	52821658	0	1	210,	0	-2.42	-3.03	1.01	exon (NM_024646, exon 14 of 14)	exon (NM_024646, exon 14 of 14)	-21207	NM_001307931	440590	Hs.658458	NM_001004339	protein-coding
1	87109308	87109459	ENSG00000153936	ENSG00000267272	LINC01140	long intergenic non-protein coding RNA 1140	0.014	+	87109308	87109459	0	1	151,	0	-3.54	-4.29	1.02	3' UTR (NM_012262, exon 7 of 7)	3' UTR (NM_012262, exon 7 of 7)	-20381	NR_026989	339524	Hs.306423	NM_207357	ncRNA
1	21823065	21823366	ENSG00000187942	ENSG00000187942	LDLRAD2	low density lipoprotein receptor class A domain containing 2	0.063	+	21823065	21823366	0	1	301,	0	-2.19	-2.76	1.03	3' UTR (NM_001291860, exon 97 of 97)	3' UTR (NM_001291860, exon 97 of 97)	10951	NM_001013693	401944	Hs.745158	NM_001013693	protein-coding
1	236208084	236208325	ENSG00000077585	ENSG00000077585	GPR137B	G protein-coupled receptor 137B	0.033	+	236208084	236208325	0	1	241,	0	-2.76	-3.41	1.03	3' UTR (NM_003272, exon 7 of 7)	3' UTR (NM_003272, exon 7 of 7)	65666	NM_003272	7107	Hs.498160	NM_003272	protein-coding
1	243505076	243512366	ENSG00000117020	ENSG00000265201	MIR4677	microRNA 4677	0.0032	-	243505076	243512366	0	2	258,43,	0,7247	-4.85	-5.75	1.05	intron (NM_001370074, intron 13 of 13).2	AluSz|SINE|Alu	162545	NR_039824	100616343		NR_039824	ncRNA
1	27355183	27355393	ENSG00000142733	ENSG00000142733	MAP3K6	mitogen-activated protein kinase kinase kinase 6	0.069	-	27355183	27355393	0	1	210,	0	-2.11	-2.67	1.06	3' UTR (NM_004672, exon 29 of 29)	3' UTR (NM_004672, exon 29 of 29)	11673	NM_004672	9064	Hs.194694	NM_004672	protein-coding
1	28438184	28438394	ENSG00000204138	ENSG00000204138	PHACTR4	phosphatase and actin regulator 4	0.16	+	28438184	28438394	0	1	210,	0	-1.4	-1.83	1.06	5' UTR (NM_023923, exon 1 of 13)	5' UTR (NM_023923, exon 1 of 13)	139	NM_023923	65979	Hs.225641	NM_023923	protein-coding
1	108937083	108937383	ENSG00000121940	ENSG00000121940	CLCC1	chloride channel CLIC like 1	1e-07	-	108937083	108937383	0	1	300,	0	-14.5	-16.1	1.07	exon (NM_001278202, exon 7 of 9)	exon (NM_001278202, exon 7 of 9)	13215	NM_001278202	23155	Hs.658489	NM_015127	protein-coding
1	204403744	204404014	ENSG00000158615	ENSG00000158615	PPP1R15B	protein phosphatase 1 regulatory subunit 15B	5.2e-22	-	204403744	204404014	0	1	270,	0	-46.5	-49	1.07	3' UTR (NM_032833, exon 2 of 2)	3' UTR (NM_032833, exon 2 of 2)	7938	NM_032833	84919	Hs.304376	NM_032833	protein-coding
1	162528102	162528283	ENSG00000152332	ENSG00000152332	UHMK1	U2AF homology motif kinase 1	2.3e-14	+	162528102	162528283	0	1	181,	0	-29.3	-31.4	1.08	3' UTR (NM_001184763, exon 8 of 8)	3' UTR (NM_001184763, exon 8 of 8)	30375	NM_175866	127933	Hs.127310	NM_144624	protein-coding
1	24535102	24535643	ENSG00000117602		NCMAP-DT	NCMAP divergent transcript	6.7e-05	+	24535102	24535643	0	1	541,	0	-8.4	-9.61	1.09	3' UTR (NM_001251984, exon 4 of 4)	3' UTR (NM_001251984, exon 4 of 4)	20651	NR_109781	100506985	Hs.607088	NR_109781	ncRNA
1	168252186	168252427	ENSG00000213064	ENSG00000214262	ANKRD36BP1	ankyrin repeat domain 36B pseudogene 1	1.1e-06	+	168252186	168252427	0	1	241,	0	-12.3	-13.7	1.09	3' UTR (NM_199344, exon 8 of 8)	3' UTR (NM_199344, exon 8 of 8)	-4877	NR_026844	84832	Hs.537067	NR_026844	pseudo
1	28150491	28176624	ENSG00000169403	ENSG00000169403	PTAFR	platelet activating factor receptor	0.023	-	28150491	28176624	0	2	568,33,	0,26100	-3.07	-3.77	1.1	intron (NM_001164722, intron 1 of 1)	MIRb|SINE|MIR	13132	NM_000952	5724	Hs.77542	NM_000952	protein-coding
1	245124674	245125095	ENSG00000203666	ENSG00000162849	KIF26B	kinesin family member 26B	0.0023	+	245124674	245125095	0	1	421,	0	-5.13	-6.06	1.12	non-coding (NR_026587, exon 6 of 6)	non-coding (NR_026587, exon 6 of 6)	-30100	NM_018012	55083	Hs.143134	NM_018012	protein-coding
1	10629739	10630009	ENSG00000142655	ENSG00000142655	PEX14	peroxisomal biogenesis factor 14	0.00036	+	10629739	10630009	0	1	270,	0	-6.83	-7.92	1.14	exon (NM_004565, exon 9 of 9)	exon (NM_004565, exon 9 of 9)	154924	NM_004565	5195	Hs.149983	NM_004565	protein-coding
1	68476788	68479216	ENSG00000024526	ENSG00000234264	DEPDC1-AS1	DEPDC1 antisense RNA 1	3.9e-21	-	68476788	68479216	0	3	281,186,73,	0,998,2355	-44.6	-47	1.14	intron (NM_001114120, intron 10 of 11)	intron (NM_001114120, intron 10 of 11)	-18674	NR_110671	101927220	Hs.382856	NR_110671	ncRNA
1	37989960	37990621	ENSG00000183431	ENSG00000183431	SF3A3	splicing factor 3a subunit 3	0.00021	-	37989960	37990621	0	1	661,	0	-7.32	-8.45	1.15	promoter-TSS (NM_001320830)	promoter-TSS (NM_001320830)	-269	NM_006802	10946	Hs.77897	NM_006802	protein-coding
1	226631689	226631840	ENSG00000143772		ITPKB-IT1	ITPKB intronic transcript 1	0.093	-	226631689	226631840	0	1	151,	0	-1.86	-2.37	1.17	TTS (NM_002221)	TTS (NM_002221)	43303	NR_103784	100506443	Hs.664293	NR_103784	ncRNA
1	212895258	212895438	ENSG00000162769	ENSG00000162769	FLVCR1	feline leukemia virus subgroup C cellular receptor 1	0.013	+	212895258	212895438	0	1	180,	0	-3.58	-4.34	1.18	3' UTR (NM_014053, exon 10 of 10)	3' UTR (NM_014053, exon 10 of 10)	37073	NM_014053	28982	Hs.7055	NM_014053	protein-coding
1	117033972	117034152	ENSG00000134256	ENSG00000236137	LOC101929099	uncharacterized LOC101929099	0.16	+	117033972	117034152	0	1	180,	0	-1.43	-1.86	1.27	exon (NM_004258, exon 9 of 10)	exon (NM_004258, exon 9 of 10)	25428	NR_110786	101929099	Hs.559118	NR_110786	ncRNA
1	211745551	211745821	ENSG00000123684		LOC91548	uncharacterized LOC91548	3.4e-07	-	211745551	211745821	0	1	270,	0	-13.4	-14.9	1.27	3' UTR (NM_001320808, exon 8 of 8)	3' UTR (NM_001320808, exon 8 of 8)	69924	NR_148994	91548	Hs.367839	NR_148994	ncRNA
1	211747496	211747587	ENSG00000123684		LOC91548	uncharacterized LOC91548	0.025	-	211747496	211747587	0	1	91,	0	-3.02	-3.7	1.3	3' UTR (NM_001320808, exon 8 of 8)	3' UTR (NM_001320808, exon 8 of 8)	71780	NR_148994	91548	Hs.367839	NR_148994	ncRNA
1	43451428	43451639	ENSG00000198198	ENSG00000178922	HYI	hydroxypyruvate isomerase (putative)	0.052	+	43451428	43451639	0	1	211,	0	-2.36	-2.95	1.31	exon (NM_001243526, exon 8 of 9)	exon (NM_001243526, exon 8 of 9)	2397	NM_031207	81888	Hs.709864	NM_031207	protein-coding
1	12509828	12510129	ENSG00000048707	ENSG00000266079	SNORA59B	small nucleolar RNA, H/ACA box 59B	0.00015	+	12509828	12510129	0	1	301,	0	-7.65	-8.81	1.32	3' UTR (NM_018156, exon 69 of 69)	3' UTR (NM_018156, exon 69 of 69)	2733	NR_003022	677882	Hs.658450	NR_003022	snoRNA
1	156671809	156672498	ENSG00000132688	ENSG00000132688	NES	nestin	0.025	-	156671809	156672498	0	1	689,	0	-3	-3.69	1.37	exon (NM_006617, exon 4 of 4)	exon (NM_006617, exon 4 of 4)	5253	NM_006617	10763	Hs.527971	NM_006617	protein-coding
1	43451419	43451731	ENSG00000178922	ENSG00000178922	HYI	hydroxypyruvate isomerase (putative)	0.025	-	43451419	43451731	0	2	125,84,	0,228	-2.98	-3.67	1.39	3' UTR (NM_001365999, exon 72 of 72)	3' UTR (NM_001365999, exon 72 of 72)	2356	NM_031207	81888	Hs.709864	NM_031207	protein-coding
1	175160393	175160813	ENSG00000235750	ENSG00000235750	KIAA0040	KIAA0040	0.17	-	175160393	175160813	0	1	420,	0	-1.34	-1.75	1.44	3' UTR (NM_014656, exon 4 of 4)	3' UTR (NM_014656, exon 4 of 4)	32173	NM_001162895	9674	Hs.518138	NM_014656	protein-coding
1	151161895	151162045	ENSG00000163155	ENSG00000163155	LYSMD1	LysM domain containing 1	0.056	-	151161895	151162045	0	1	150,	0	-2.31	-2.89	1.45	exon (NM_001136543, exon 2 of 3)	exon (NM_001136543, exon 2 of 3)	3932	NM_001136543	388695	Hs.591482	NM_212551	protein-coding
1	21822227	21822587	ENSG00000187942	ENSG00000187942	LDLRAD2	low density lipoprotein receptor class A domain containing 2	0.017	+	21822227	21822587	0	1	360,	0	-3.32	-4.05	1.47	3' UTR (NM_001291860, exon 97 of 97)	3' UTR (NM_001291860, exon 97 of 97)	10142	NM_001013693	401944	Hs.745158	NM_001013693	protein-coding
1	93137431	93137522	ENSG00000143033	ENSG00000117500	TMED5	transmembrane p24 trafficking protein 5	0.00015	+	93137431	93137522	0	1	91,	0	-7.64	-8.8	1.52	3' UTR (NM_001164391, exon 16 of 16)	3' UTR (NM_001164391, exon 16 of 16)	42936	NR_030761	50999	Hs.482873	NM_016040	protein-coding
1	149851534	149851624	ENSG00000272196	ENSG00000203812	HIST2H2AA3	histone cluster 2 H2A family member a3	0.082	+	149851534	149851624	0	1	90,	0	-1.97	-2.5	1.54	promoter-TSS (NR_036461)	promoter-TSS (NR_036461)	518	NM_003516	8337	Hs.530461	NM_003516	protein-coding
1	243503218	243503458	ENSG00000117020	ENSG00000265201	MIR4677	microRNA 4677	0.0079	-	243503218	243503458	0	1	240,	0	-4.02	-4.84	1.57	3' UTR (NM_005465, exon 14 of 14).2	3' UTR (NM_005465, exon 14 of 14).2	157162	NR_039824	100616343		NR_039824	ncRNA
1	162518175	162522688	ENSG00000152332	ENSG00000152332	UHMK1	U2AF homology motif kinase 1	1.2e-16	+	162518175	162522688	0	2	15,285,	0,4228	-34.4	-36.7	1.59	intron (NM_175866, intron 7 of 7)	L2a|LINE|L2	22614	NM_175866	127933	Hs.127310	NM_144624	protein-coding
1	21822244	21822575	ENSG00000142798	ENSG00000187942	LDLRAD2	low density lipoprotein receptor class A domain containing 2	0.0087	-	21822244	21822575	0	1	331,	0	-3.94	-4.75	1.65	3' UTR (NM_001291860, exon 97 of 97)	3' UTR (NM_001291860, exon 97 of 97)	10145	NM_001013693	401944	Hs.745158	NM_001013693	protein-coding
1	155726857	155727529	ENSG00000132676		MSTO2P	misato family member 2, pseudogene	9.5e-05	+	155726857	155727529	0	2	181,29,	0,643	-8.06	-9.26	1.68	intron (NM_001199850, intron 5 of 11)	intron (NM_001199850, intron 5 of 11)	-18575	NR_024117	100129405	Hs.656361	NR_024117	pseudo
1	232976474	232976865	ENSG00000135778	ENSG00000135778	NTPCR	nucleoside-triphosphatase, cancer-related	0.0032	+	232976474	232976865	0	1	391,	0	-4.84	-5.73	1.76	intron (NR_138026, intron 3 of 3)	intron (NR_138026, intron 3 of 3)	25828	NR_138027	84284	Hs.642715	NM_032324	protein-coding
1	113763685	113763925	ENSG00000081019	ENSG00000116793	PHTF1	putative homeodomain transcription factor 1	2.5e-06	-	113763685	113763925	0	1	240,	0	-11.5	-12.9	1.88	non-coding (NR_130896, exon 8 of 8)	non-coding (NR_130896, exon 8 of 8)	-3917	NM_001323042	10745	Hs.655824	NM_006608	protein-coding
1	113973947	113974038	ENSG00000163349	ENSG00000116774	OLFML3	olfactomedin like 3	1.8e-05	+	113973947	113974038	0	1	91,	0	-9.63	-10.9	1.9	3' UTR (NM_181358, exon 14 of 14)	3' UTR (NM_181358, exon 14 of 14)	-5398	NM_001286353	56944	Hs.9315	NM_020190	protein-coding
1	100107721	100107842	ENSG00000156876	ENSG00000156876	SASS6	SAS-6 centriolar assembly protein	1.9e-08	-	100107721	100107842	0	1	121,	0	-16.1	-17.8	1.95	intron (NM_001304829, intron 8 of 15)	intron (NM_001304829, intron 8 of 15)	25148	NM_001304829	163786	Hs.591447	NM_194292	protein-coding
1	197154098	197154159	ENSG00000177888	ENSG00000066279	ASPM	abnormal spindle microtubule assembly	0.16	-	197154098	197154159	0	1	61,	0	-1.41	-1.83	2.03	non-coding (NR_135153, exon 11 of 11)	non-coding (NR_135153, exon 11 of 11)	-7435	NM_001206846	259266	Hs.121028	NM_018136	protein-coding
1	89020714	89022864	ENSG00000117226	ENSG00000117226	GBP3	guanylate binding protein 3	0.0017	-	89020714	89022864	0	2	29,181,	0,1969	-5.43	-6.39	2.14	intron (NM_018284, intron 1 of 10)	(GA)n|Simple_repeat|Simple_repeat	1077	NM_001319180	2635	Hs.720167	NM_018284	protein-coding
1	26696069	26696190	ENSG00000117713	ENSG00000117713	ARID1A	AT-rich interaction domain 1A	0.042	+	26696069	26696190	0	1	121,	0	-2.55	-3.17	2.43	5' UTR (NM_006015, exon 1 of 20)	5' UTR (NM_006015, exon 1 of 20)	115	NM_006015	8289	Hs.468972	NM_006015	protein-coding
1	24416603	24416904	ENSG00000001460	ENSG00000001461	NIPAL3	NIPA like domain containing 3	0.15	-	24416603	24416904	0	1	301,	0	-1.46	-1.89	3.05	intron (NM_001322855, intron 2 of 12)	intron (NM_001322855, intron 2 of 12)	729	NM_001322857	57185	Hs.523442	NM_020448	protein-coding
1	89104454	89104710	ENSG00000234518	ENSG00000162645	GBP2	guanylate binding protein 2	0.013	-	89104454	89104710	0	1	256,	0	-3.56	-4.32	3.05	Intergenic	Intergenic	21532	NM_004120	2634	Hs.386567	NM_004120	protein-coding
1	160753150	160753300	ENSG00000026751	ENSG00000026751	SLAMF7	SLAM family member 7	0.14	+	160753150	160753300	0	1	150,	0	-1.51	-1.95	3.64	3' UTR (NM_021181, exon 7 of 7)	3' UTR (NM_021181, exon 7 of 7)	13978	NM_001282596	57823	Hs.517265	NM_021181	protein-coding
2	202375194	202375546	ENSG00000273456	ENSG00000204217	BMPR2	bone morphogenetic protein receptor type 2	0.15	-	202375194	202375546	0	1	352,	0	-1.46	-1.9	-4.21	promoter-TSS (NM_001204)	promoter-TSS (NM_001204)	-957	NM_001204	659	Hs.471119	NM_001204	protein-coding
2	231706924	231707104	ENSG00000187514	ENSG00000187514	PTMA	prothymosin alpha	0.01	+	231706924	231707104	0	1	180,	0	-3.8	-4.59	-3.94	Intergenic	CpG	-1511	NM_001099285	5757	Hs.459927	NM_002823	protein-coding
2	109968158	109968399	ENSG00000186148	ENSG00000204588	LINC01123	long intergenic non-protein coding RNA 1123	0.16	+	109968158	109968399	0	1	241,	0	-1.39	-1.81	-3.92	non-coding (NR_027145, exon 18 of 18)	non-coding (NR_027145, exon 18 of 18)	-18701	NR_046112	440894	Hs.516403	NR_046110	ncRNA
2	109968167	109968378	ENSG00000284337	ENSG00000204588	LINC01123	long intergenic non-protein coding RNA 1123	0.17	+	109968167	109968378	0	1	211,	0	-1.36	-1.78	-3.87	non-coding (NR_027145, exon 18 of 18)	non-coding (NR_027145, exon 18 of 18)	-18707	NR_046112	440894	Hs.516403	NR_046110	ncRNA
2	97677668	97688988	ENSG00000228486	ENSG00000228486	C2orf92	chromosome 2 open reading frame 92	0.017	+	97677668	97688988	0	2	87,94,	0,11226	-3.37	-4.1	-3.66	intron (NR_038386, intron 5 of 9)	L1MB4|LINE|L1	13585	NM_001351368	728537	Hs.469369	NM_001351368	protein-coding
2	74834010	74834250	ENSG00000159399	ENSG00000159399	HK2	hexokinase 2	6.2e-08	+	74834010	74834250	0	1	240,	0	-15	-16.6	-3.46	5' UTR (NM_000189, exon 1 of 18)	5' UTR (NM_000189, exon 1 of 18)	1475	NM_000189	3099	Hs.406266	NM_000189	protein-coding
2	10690968	10691564	ENSG00000243819	ENSG00000243819	RN7SL832P	RNA, 7SL, cytoplasmic 832, pseudogene	0.00082	+	10690968	10691564	0	1	596,	0	-6.08	-7.11	-3.36	non-coding (NR_144555, exon 1 of 1)	non-coding (NR_144555, exon 1 of 1)	1256	NR_144555	106479524	Hs.646340	NR_144555	pseudo
2	88628230	88628650	ENSG00000234028	ENSG00000234028	EIF2AK3-DT	EIF2AK3 divergent transcript	0.004	+	88628230	88628650	0	1	420,	0	-4.64	-5.51	-3.1	promoter-TSS (NM_004836)	promoter-TSS (NM_004836)	611	NR_135540	101928403	Hs.434326	NR_135540	ncRNA
2	111366590	111366831	ENSG00000172965	ENSG00000265507	MIR4435-1	microRNA 4435-1	0.14	-	111366590	111366831	0	1	241,	0	-1.5	-1.94	-3.09	non-coding (NR_136162, exon 2 of 5)	non-coding (NR_136162, exon 2 of 5)	-45620	NR_039634	100616499		NR_039634	ncRNA
2	88628195	88628644	ENSG00000234028	ENSG00000234028	EIF2AK3-DT	EIF2AK3 divergent transcript	0.0043	+	88628195	88628644	0	1	449,	0	-4.57	-5.44	-3.04	promoter-TSS (NM_004836)	promoter-TSS (NM_004836)	591	NR_135540	101928403	Hs.434326	NR_135540	ncRNA
2	178620847	178621346	ENSG00000155657	ENSG00000237298	TTN-AS1	TTN antisense RNA 1	0.07	-	178620847	178621346	0	2	146,245,	0,254	-2.1	-2.66	-2.9	TTS (NR_038271)	TTS (NR_038271)	97906	NR_038271	100506866	Hs.710694	NR_038271	ncRNA
2	237574441	237574711	ENSG00000124839	ENSG00000071677	PRLH	prolactin releasing hormone	0.16	-	237574441	237574711	0	1	270,	0	-1.41	-1.83	-2.88	non-coding (NR_033308, exon 5 of 5)	non-coding (NR_033308, exon 5 of 5)	8002	NM_015893	51052	Hs.247710	NM_015893	protein-coding
2	111884270	111884600	ENSG00000153107	ENSG00000153107	ANAPC1	anaphase promoting complex subunit 1	0.12	-	111884270	111884600	0	1	330,	0	-1.65	-2.12	-2.87	promoter-TSS (NM_022662)	promoter-TSS (NM_022662)	-242	NM_022662	64682	Hs.436527	NM_022662	protein-coding
2	86195649	86195770	ENSG00000132305	ENSG00000132305	IMMT	inner membrane mitochondrial protein	0.17	-	86195649	86195770	0	1	121,	0	-1.37	-1.78	-2.85	promoter-TSS (NM_001100170)	promoter-TSS (NM_001100170)	60	NM_001100170	10989	Hs.148559	NM_006839	protein-coding
2	178542366	178542705	ENSG00000155657	ENSG00000237298	TTN-AS1	TTN antisense RNA 1	0.03	-	178542366	178542705	0	2	197,44,	0,295	-2.83	-3.5	-2.73	exon (NM_133432, exon 178 of 192)	exon (NM_133432, exon 178 of 192)	19345	NR_038271	100506866	Hs.710694	NR_038271	ncRNA
2	232584660	232586108	ENSG00000237126	ENSG00000115468	EFHD1	EF-hand domain family member D1	0.15	-	232584660	232586108	0	2	131,49,	0,1399	-1.48	-1.92	-2.71	Intergenic	ERVL-B4-int|LTR|ERVL	-20673	NM_001243252	80303	Hs.516769	NM_025202	protein-coding
2	241659638	241666612	ENSG00000168397	ENSG00000168393	DTYMK	deoxythymidylate kinase	0.01	+	241659638	241666612	0	2	134,17,	0,6957	-3.82	-4.61	-2.69	intron (NM_013325, intron 7 of 12)	AluSz6|SINE|Alu	23690	NR_135492	1841	Hs.471873	NM_012145	protein-coding
2	55615306	55615397	ENSG00000275052	ENSG00000275052	PPP4R3B	protein phosphatase 4 regulatory subunit 3B	0.14	-	55615306	55615397	0	1	91,	0	-1.54	-1.99	-2.65	intron (NM_020463, intron 2 of 14)	intron (NM_020463, intron 2 of 14)	2270	NM_001282850	57223	Hs.516182	NM_020463	protein-coding
2	10450073	10450223	ENSG00000257135		ODC1-DT	ODC1 divergent transcript	0.14	+	10450073	10450223	0	1	150,	0	-1.53	-1.98	-2.62	non-coding (NR_110597, exon 2 of 5)	non-coding (NR_110597, exon 2 of 5)	420	NR_110597	101929715	Hs.634550	NR_110597	ncRNA
2	86022223	86022344	ENSG00000068654	ENSG00000068654	POLR1A	RNA polymerase I subunit A	0.11	-	86022223	86022344	0	1	121,	0	-1.69	-2.17	-2.62	3' UTR (NM_015425, exon 34 of 34)	3' UTR (NM_015425, exon 34 of 34)	83602	NM_015425	25885	Hs.531818	NM_015425	protein-coding
2	240561621	240562070	ENSG00000188542	ENSG00000144504	ANKMY1	ankyrin repeat and MYND domain containing 1	2.3e-09	+	240561621	240562070	0	1	449,	0	-18.1	-19.9	-2.51	promoter-TSS (NM_001354025)	promoter-TSS (NM_001354025)	-736	NR_148697	51281	Hs.656615	NM_016552	protein-coding
2	46519030	46519449	ENSG00000250565	ENSG00000119729	RHOQ	ras homolog family member Q	0.039	-	46519030	46519449	0	1	419,	0	-2.61	-3.24	-2.41	intron (NM_001371283, intron 3 of 3)	MamRep605|LTR?|LTR?	-23250	NM_012249	23433	Hs.709193	NM_012249	protein-coding
2	181893580	181893761	ENSG00000138434	ENSG00000138434	ITPRID2	ITPR interacting domain containing 2	0.006	+	181893580	181893761	0	1	181,	0	-4.28	-5.12	-2.41	3' UTR (NM_001287505, exon 2 of 2)	3' UTR (NM_001287505, exon 2 of 2)	1941	NM_001130445	6744	Hs.196983	NM_006751	protein-coding
2	190436035	190436216	ENSG00000151690	ENSG00000151690	MFSD6	major facilitator superfamily domain containing 6	0.17	+	190436035	190436216	0	1	181,	0	-1.34	-1.75	-2.4	exon (NM_017694, exon 3 of 8)	exon (NM_017694, exon 3 of 8)	27771	NM_017694	54842	Hs.418581	NM_017694	protein-coding
2	74473202	74473322	ENSG00000204822	ENSG00000204822	MRPL53	mitochondrial ribosomal protein L53	0.15	-	74473202	74473322	0	1	120,	0	-1.44	-1.87	-2.39	promoter-TSS (NM_053050)	promoter-TSS (NM_053050)	-582	NM_053050	116540	Hs.534527	NM_053050	protein-coding
2	159903077	159904599	ENSG00000054219	ENSG00000054219	LY75	lymphocyte antigen 75	0.00075	-	159903077	159904599	0	2	528,11,	0,1511	-6.15	-7.19	-2.35	intron (NM_002349, intron 1 of 34)	intron (NM_002349, intron 1 of 34)	918	NM_002349	4065	Hs.153563	NM_002349	protein-coding
2	178617818	178618436	ENSG00000155657	ENSG00000237298	TTN-AS1	TTN antisense RNA 1	3.4e-06	-	178617818	178618436	0	2	263,248,	0,370	-11.2	-12.6	-2.35	intron (NM_001256850, intron 202 of 312)	intron (NM_001256850, intron 202 of 312)	94936	NR_038271	100506866	Hs.710694	NR_038271	ncRNA
2	112483480	112485917	ENSG00000114999	ENSG00000114999	TTL	tubulin tyrosine ligase	0.00037	+	112483480	112485917	0	2	450,1,	0,2436	-6.82	-7.9	-2.32	intron (NM_153712, intron 1 of 6)	intron (NM_153712, intron 1 of 6)	2543	NM_153712	150465	Hs.358997	NM_153712	protein-coding
2	177321851	177322091	ENSG00000213963	ENSG00000278418	MIR6512	microRNA 6512	9.6e-05	-	177321851	177322091	0	1	240,	0	-8.05	-9.25	-2.28	intron (NR_026966, intron 6 of 8)	AluY|SINE|Alu	-8089	NR_106767	102465255		NR_106767	ncRNA
2	232549638	232550115	ENSG00000221944	ENSG00000221944	TIGD1	tigger transposable element derived 1	1.1e-05	-	232549638	232550115	0	1	477,	0	-10.1	-11.4	-2.22	promoter-TSS (NM_004846)	promoter-TSS (NM_004846)	680	NM_145702	200765	Hs.211823	NM_145702	protein-coding
2	159771834	159771895	ENSG00000241399	ENSG00000241399	CD302	CD302 molecule	7.8e-05	-	159771834	159771895	0	1	61,	0	-8.25	-9.46	-2.21	TTS (NM_022826)	TTS (NM_022826)	26343	NM_014880	9936	Hs.130014	NM_014880	protein-coding
2	101986392	101986988	ENSG00000281162		LINC01127	long intergenic non-protein coding RNA 1127	0.085	+	101986392	101986988	0	1	596,	0	-1.93	-2.46	-2.19	Intergenic	Intergenic	3225	NR_103791	100506328	Hs.516245	NR_103791	ncRNA
2	161163178	161163479	ENSG00000136560	ENSG00000136560	TANK	TRAF family member associated NFKB activator	0.00011	+	161163178	161163479	0	1	301,	0	-7.91	-9.09	-2.17	intron (NM_001199135, intron 1 of 7)	intron (NM_001199135, intron 1 of 7)	2901	NM_001199135	10010	Hs.132257	NM_004180	protein-coding
2	177550555	177551306	ENSG00000196659	ENSG00000196659	TTC30B	tetratricopeptide repeat domain 30B	0.00066	-	177550555	177551306	0	1	751,	0	-6.28	-7.33	-2.16	exon (NM_152517, exon 1 of 1)	exon (NM_152517, exon 1 of 1)	1865	NM_152517	150737	Hs.447659	NM_152517	protein-coding
2	159695248	159695369	ENSG00000226266	ENSG00000123636	BAZ2B	bromodomain adjacent to zinc finger domain 2B	0.15	-	159695248	159695369	0	1	121,	0	-1.46	-1.89	-2.13	non-coding (NR_110586, exon 3 of 3)	non-coding (NR_110586, exon 3 of 3)	17133	NR_110586	29994	Hs.470369	NM_013450	protein-coding
2	177227594	177227864	ENSG00000116044	ENSG00000170144	HNRNPA3	heterogeneous nuclear ribonucleoprotein A3	0.036	-	177227594	177227864	0	1	270,	0	-2.69	-3.33	-2.13	Intergenic	Intergenic	14935	NR_138470	220988	Hs.516539	NM_194247	protein-coding
2	238224551	238224822	ENSG00000186235	ENSG00000186235	LINC02610	long intergenic non-protein coding RNA 2610	0.12	-	238224551	238224822	0	1	271,	0	-1.67	-2.15	-2.13	TTS (NR_026925)	TTS (NR_026925)	6990	NR_026926	151174	Hs.424165	NR_026925	ncRNA
2	46534366	46534665	ENSG00000250565	ENSG00000119729	RHOQ	ras homolog family member Q	0.032	-	46534366	46534665	0	1	299,	0	-2.78	-3.44	-2.1	intron (NM_001371282, intron 3 of 4)	L1MEc|LINE|L1	-7974	NM_012249	23433	Hs.709193	NM_012249	protein-coding
2	86195646	86196049	ENSG00000273080	ENSG00000132305	IMMT	inner membrane mitochondrial protein	0.034	+	86195646	86196049	0	1	403,	0	-2.72	-3.37	-2.09	promoter-TSS (NM_001100170)	promoter-TSS (NM_001100170)	-78	NM_006839	10989	Hs.148559	NM_006839	protein-coding
2	159902508	159902958	ENSG00000054219	ENSG00000054219	LY75	lymphocyte antigen 75	0.0043	-	159902508	159902958	0	1	450,	0	-4.57	-5.44	-2	intron (NM_002349, intron 1 of 34)	intron (NM_002349, intron 1 of 34)	2023	NM_002349	4065	Hs.153563	NM_002349	protein-coding
2	189689646	189689947	ENSG00000151687	ENSG00000151687	ANKAR	ankyrin and armadillo repeat containing	0.00052	+	189689646	189689947	0	1	301,	0	-6.49	-7.56	-1.98	exon (NM_144708, exon 3 of 23)	exon (NM_144708, exon 3 of 23)	13812	NM_144708	150709	Hs.60772	NM_144708	protein-coding
2	174395997	174397398	ENSG00000144306	ENSG00000144306	SCRN3	secernin 3	0.0018	+	174395997	174397398	0	2	296,63,	0,1338	-5.36	-6.32	-1.97	promoter-TSS (NM_004882)	promoter-TSS (NM_004882)	968	NM_024583	79634	Hs.470679	NM_024583	protein-coding
2	27104356	27104536	ENSG00000138028	ENSG00000138028	CGREF1	cell growth regulator with EF-hand domain 1	0.053	-	27104356	27104536	0	1	180,	0	-2.35	-2.94	-1.95	intron (NM_006569, intron 1 of 5)	intron (NM_006569, intron 1 of 5)	14681	NM_001301324	10669	Hs.159525	NM_006569	protein-coding
2	45652132	45652283	ENSG00000171132	ENSG00000171132	PRKCE	protein kinase C epsilon	0.12	+	45652132	45652283	0	1	151,	0	-1.68	-2.15	-1.95	exon (NM_005400, exon 1 of 15)	exon (NM_005400, exon 1 of 15)	533	NM_005400	5581	Hs.580351	NM_005400	protein-coding
2	177342012	177342311	ENSG00000213963	ENSG00000278418	MIR6512	microRNA 6512	0.038	-	177342012	177342311	0	1	299,	0	-2.63	-3.27	-1.95	intron (NR_026966, intron 1 of 8)	L2|LINE|L2	-28280	NR_106767	102465255		NR_106767	ncRNA
2	111321522	111321732	ENSG00000279191	ENSG00000265507	MIR4435-1	microRNA 4435-1	0.15	-	111321522	111321732	0	1	210,	0	-1.44	-1.88	-1.94	promoter-TSS (NR_039634).2	promoter-TSS (NR_039634).2	-536	NR_039634	100616499		NR_039634	ncRNA
2	27626865	27627883	ENSG00000176714	ENSG00000198522	GPN1	GPN-loop GTPase 1	0.00096	-	27626865	27627883	0	1	1018,	0	-5.93	-6.95	-1.93	exon (NM_001142683, exon 2 of 2)	exon (NM_001142683, exon 2 of 2)	-1274	NM_001145049	11321	Hs.18259	NM_007266	protein-coding
2	65083979	65084040	ENSG00000011523	ENSG00000011523	CEP68	centrosomal protein 68	0.045	+	65083979	65084040	0	1	61,	0	-2.49	-3.11	-1.93	non-coding (NR_134966, exon 6 of 6)	non-coding (NR_134966, exon 6 of 6)	27594	NM_001319101	23177	Hs.709257	NM_015147	protein-coding
2	95159571	95165413	ENSG00000144026	ENSG00000144026	ZNF514	zinc finger protein 514	0.0019	-	95159571	95165413	0	2	36,383,	0,5459	-5.3	-6.24	-1.92	Intergenic	AluSp|SINE|Alu	-2644	NM_032788	84874	Hs.355664	NM_032788	protein-coding
2	178137157	178137516	ENSG00000155636	ENSG00000155636	RBM45	RNA binding motif protein 45	0.049	+	178137157	178137516	0	1	359,	0	-2.41	-3.02	-1.92	Intergenic	L1ME3A|LINE|L1	24900	NM_001365579	129831	Hs.377257	NM_152945	protein-coding
2	32202709	32203309	ENSG00000229816	ENSG00000152683	SLC30A6	solute carrier family 30 member 6	0.039	+	32202709	32203309	0	1	600,	0	-2.61	-3.24	-1.91	intron (NM_001330476, intron 7 of 10)	intron (NM_001330476, intron 7 of 10)	37145	NM_001330477	55676	Hs.23248	NM_017964	protein-coding
2	101011214	101011335	ENSG00000204634	ENSG00000071082	RPL31	ribosomal protein L31	0.012	-	101011214	101011335	0	1	121,	0	-3.62	-4.39	-1.91	intron (NM_001102426, intron 18 of 19)	intron (NM_001102426, intron 18 of 19)	8986	NM_000993	6160	Hs.469473	NM_000993	protein-coding
2	11446048	11446378	ENSG00000169016	ENSG00000169016	E2F6	E2F transcription factor 6	0.0014	-	11446048	11446378	0	1	330,	0	-5.57	-6.55	-1.88	non-coding (NR_103490, exon 5 of 5)	non-coding (NR_103490, exon 5 of 5)	19948	NM_212540	1876	Hs.603093	NM_198256	protein-coding
2	127735918	127736189	ENSG00000136709	ENSG00000173349	SFT2D3	SFT2 domain containing 3	0.00096	-	127735918	127736189	0	1	271,	0	-5.93	-6.95	-1.88	3' UTR (NM_001006623, exon 8 of 8)	3' UTR (NM_001006623, exon 8 of 8)	34557	NM_032740	84826	Hs.345849	NM_032740	protein-coding
2	186364597	186365010	ENSG00000227692	ENSG00000065548	ZC3H15	zinc finger CCCH-type containing 15	0.13	+	186364597	186365010	0	1	413,	0	-1.56	-2.02	-1.88	Intergenic	Intergenic	-121456	NM_018471	55854	Hs.741180	NM_018471	protein-coding
2	46916276	46916576	ENSG00000068724	ENSG00000180398	MCFD2	multiple coagulation factor deficiency 2	0.003	+	46916276	46916576	0	1	300,	0	-4.91	-5.81	-1.87	promoter-TSS (NM_139279)	promoter-TSS (NM_139279)	-314	NM_001171507	90411	Hs.662152	NM_139279	protein-coding
2	232548178	232549400	ENSG00000221944	ENSG00000221944	TIGD1	tigger transposable element derived 1	9.3e-11	-	232548178	232549400	0	1	1222,	0	-21.2	-23.1	-1.86	TTS (NM_005199)	TTS (NM_005199)	1768	NM_145702	200765	Hs.211823	NM_145702	protein-coding
2	238275746	238277762	ENSG00000132326	ENSG00000132326	PER2	period circadian regulator 2	0.00021	-	238275746	238277762	0	3	151,63,56,	0,1384,1960	-7.31	-8.45	-1.86	intron (NM_022817, intron 3 of 22)	intron (NM_022817, intron 3 of 22)	11856	NM_022817	8864	Hs.58756	NM_003894	protein-coding
2	86026360	86026660	ENSG00000068654	ENSG00000068654	POLR1A	RNA polymerase I subunit A	5.4e-05	-	86026360	86026660	0	1	300,	0	-8.58	-9.82	-1.84	3' UTR (NM_015425, exon 34 of 34)	3' UTR (NM_015425, exon 34 of 34)	79376	NM_015425	25885	Hs.531818	NM_015425	protein-coding
2	96242382	96242472	ENSG00000204685	ENSG00000135956	TMEM127	transmembrane protein 127	0.012	+	96242382	96242472	0	1	90,	0	-3.68	-4.46	-1.84	non-coding (NR_046322, exon 4 of 4)	non-coding (NR_046322, exon 4 of 4)	23570	NM_001193304	55654	Hs.164303	NM_017849	protein-coding
2	61018261	61018622	ENSG00000162928	ENSG00000162927	PUS10	pseudouridine synthase 10	0.0043	+	61018261	61018622	0	1	361,	0	-4.58	-5.45	-1.83	promoter-TSS (NM_001322127)	promoter-TSS (NM_001322127)	-183	NM_001322127	150962	Hs.368348	NM_144709	protein-coding
2	64999968	65000269	ENSG00000115902	ENSG00000115902	SLC1A4	solute carrier family 1 member 4	0.076	+	64999968	65000269	0	1	301,	0	-2.04	-2.58	-1.81	intron (NM_003038, intron 1 of 7)	intron (NM_003038, intron 1 of 7)	10720	NM_003038	6509	Hs.654352	NM_003038	protein-coding
2	69644424	69720786	ENSG00000196975	ENSG00000196975	ANXA4	annexin A4	0.0032	+	69644424	69720786	0	3	481,285,13,	0,8573,76349	-4.83	-5.73	-1.81	intron (NM_001320698, intron 2 of 14)	intron (NM_001320698, intron 2 of 14)	38797	NM_001320698	307	Hs.422986	NM_001153	protein-coding
2	177323117	177323356	ENSG00000213963	ENSG00000278418	MIR6512	microRNA 6512	0.0095	-	177323117	177323356	0	1	239,	0	-3.86	-4.66	-1.75	intron (NR_026966, intron 6 of 8)	intron (NR_026966, intron 6 of 8)	-9355	NR_106767	102465255		NR_106767	ncRNA
2	55282497	55282825	ENSG00000162997	ENSG00000162997	PRORSD1P	prolyl-tRNA synthetase associated domain containing 1, pseudogene	0.042	+	55282497	55282825	0	1	328,	0	-2.54	-3.16	-1.72	non-coding (NR_027258, exon 1 of 1)	non-coding (NR_027258, exon 1 of 1)	342	NR_027258	344405	Hs.445292	NM_001080459	pseudo
2	74502748	74502988	ENSG00000179528	ENSG00000257702	LBX2-AS1	LBX2 antisense RNA 1	0.12	-	74502748	74502988	0	1	240,	0	-1.62	-2.08	-1.71	non-coding (NR_024606, exon 1 of 1)	non-coding (NR_024606, exon 1 of 1)	275	NR_024606	151534	Hs.745121	NM_138482	ncRNA
2	61010568	61010868	ENSG00000162927	ENSG00000162927	PUS10	pseudouridine synthase 10	0.0042	-	61010568	61010868	0	1	300,	0	-4.61	-5.48	-1.7	intron (NM_144709, intron 2 of 17)	MIRc|SINE|MIR	6494	NM_001322124	150962	Hs.368348	NM_144709	protein-coding
2	169741505	169749599	ENSG00000213160	ENSG00000213160	KLHL23	kelch like family member 23	0.14	+	169741505	169749599	0	2	32,178,	0,7916	-1.51	-1.95	-1.7	intron (NM_001199290, intron 5 of 5)	intron (NM_001199290, intron 5 of 5)	11720	NM_144711	151230	Hs.655150	NM_144711	protein-coding
2	181891126	181891574	ENSG00000260742	ENSG00000138434	ITPRID2	ITPR interacting domain containing 2	0.065	-	181891126	181891574	0	1	448,	0	-2.17	-2.74	-1.7	promoter-TSS (NM_001130445)	promoter-TSS (NM_001130445)	-380	NM_001287503	6744	Hs.196983	NM_006751	protein-coding
2	85549121	85549272	ENSG00000115486	ENSG00000168906	MAT2A	methionine adenosyltransferase 2A	0.1	-	85549121	85549272	0	1	151,	0	-1.78	-2.27	-1.69	3' UTR (NM_000821, exon 15 of 15)	3' UTR (NM_000821, exon 15 of 15)	10029	NM_005911	4144	Hs.516157	NM_005911	protein-coding
2	46512122	46512511	ENSG00000250565	ENSG00000119729	RHOQ	ras homolog family member Q	0.05	-	46512122	46512511	0	1	389,	0	-2.39	-2.99	-1.68	exon (NM_001371281, exon 5 of 5)	exon (NM_001371281, exon 5 of 5)	-30173	NM_012249	23433	Hs.709193	NM_012249	protein-coding
2	27357156	27357912	ENSG00000234072	ENSG00000115207	GTF3C2	general transcription factor IIIC subunit 2	0.0034	+	27357156	27357912	0	2	136,105,	0,651	-4.78	-5.67	-1.67	promoter-TSS (NM_001521)	promoter-TSS (NM_001521)	-500	NM_001521	2976	Hs.75782	NM_001521	protein-coding
2	231779256	231779437	ENSG00000156973	ENSG00000156973	PDE6D	phosphodiesterase 6D	0.11	-	231779256	231779437	0	1	181,	0	-1.71	-2.2	-1.67	non-coding (NR_110994, exon 2 of 2)	non-coding (NR_110994, exon 2 of 2)	1935	NR_110994	5147	Hs.516808	NM_002601	protein-coding
2	63564233	63571464	ENSG00000143951	ENSG00000143951	WDPCP	WD repeat containing planar cell polarity effector	0.00019	-	63564233	63571464	0	2	391,90,	0,7141	-7.45	-8.59	-1.65	intron (NR_148705, intron 1 of 16)	L2a|LINE|L2	20628	NM_001354044	51057	Hs.414952	NM_015910	protein-coding
2	45388798	45389038	ENSG00000068784	ENSG00000205054	LINC01121	long intergenic non-protein coding RNA 1121	0.0023	-	45388798	45389038	0	1	240,	0	-5.15	-6.07	-1.64	3' UTR (NM_018079, exon 21 of 21)	3' UTR (NM_018079, exon 21 of 21)	-133977	NR_033831	400952	Hs.468368	NR_033831	ncRNA
2	202036231	202036770	ENSG00000155760	ENSG00000155760	FZD7	frizzled class receptor 7	0.098	+	202036231	202036770	0	1	539,	0	-1.82	-2.32	-1.63	3' UTR (NM_003507, exon 1 of 1)	3' UTR (NM_003507, exon 1 of 1)	1914	NM_003507	8324	Hs.173859	NM_003507	protein-coding
2	74832713	74833099	ENSG00000272711	ENSG00000159399	HK2	hexokinase 2	0.13	-	74832713	74833099	0	1	386,	0	-1.56	-2.02	-1.62	5' UTR (NM_000189, exon 1 of 18)	5' UTR (NM_000189, exon 1 of 18)	251	NM_000189	3099	Hs.406266	NM_000189	protein-coding
2	72888321	72891685	ENSG00000116096	ENSG00000116096	SPR	sepiapterin reductase	1.2e-06	+	72888321	72891685	0	2	283,339,	0,3025	-12.1	-13.6	-1.6	intron (NM_003124, intron 2 of 2)	intron (NM_003124, intron 2 of 2)	2595	NM_003124	6697	Hs.301540	NM_003124	protein-coding
2	210032337	210032606	ENSG00000229127		LOC101928020	uncharacterized LOC101928020	0.00055	+	210032337	210032606	0	1	269,	0	-6.45	-7.51	-1.6	non-coding (NR_110291, exon 3 of 5)	non-coding (NR_110291, exon 3 of 5)	2550	NR_110291	101928020	Hs.635556	NR_110291	ncRNA
2	98599879	98600060	ENSG00000183513	ENSG00000183513	COA5	cytochrome c oxidase assembly factor 5	0.0036	-	98599879	98600060	0	1	181,	0	-4.74	-5.63	-1.59	3' UTR (NM_001008215, exon 3 of 3)	3' UTR (NM_001008215, exon 3 of 3)	8542	NM_001008215	493753	Hs.596537	NM_001008215	protein-coding
2	232336500	232336891	ENSG00000144535	ENSG00000163283	ALPP	alkaline phosphatase, placental	0.00023	+	232336500	232336891	0	1	391,	0	-7.26	-8.38	-1.59	non-coding (NR_046476, exon 21 of 21)	non-coding (NR_046476, exon 21 of 21)	-42055	NM_001632	250	Hs.284255	NM_001632	protein-coding
2	27359706	27367442	ENSG00000234072	ENSG00000115211	EIF2B4	eukaryotic translation initiation factor 2B subunit delta	0.0062	+	27359706	27367442	0	2	550,19,	0,7717	-4.26	-5.09	-1.58	TTS (NM_001318965)	TTS (NM_001318965)	6478	NM_001318965	8890	Hs.169474	NM_015636	protein-coding
2	101152077	101154367	ENSG00000272902	ENSG00000272902	TBC1D8-AS1	TBC1 domain family member 8 antisense RNA 1	0.057	+	101152077	101154367	0	2	682,333,	0,1957	-2.28	-2.86	-1.57	intron (NR_135594, intron 1 of 1)	intron (NR_135594, intron 1 of 1)	1562	NR_135594	100506286	Hs.679790	NR_135594	ncRNA
2	99162003	99169347	ENSG00000158411	ENSG00000144182	LIPT1	lipoyltransferase 1	1.1e-06	-	99162003	99169347	0	2	215,85,	0,7259	-12.2	-13.7	-1.55	Intergenic	MLT1N2|LTR|ERVL-MaLR	10601	NR_037935	51601	Hs.719172	NM_015929	protein-coding
2	241687294	241687565	ENSG00000168395	ENSG00000168395	ING5	inhibitor of growth family member 5	0.016	+	241687294	241687565	0	1	271,	0	-3.39	-4.12	-1.55	promoter-TSS (NR_135492)	promoter-TSS (NR_135492)	410	NM_001330161	84289	Hs.529172	NM_032329	protein-coding
2	100572037	100576558	ENSG00000115539	ENSG00000115539	PDCL3	phosducin like 3	0.0026	+	100572037	100576558	0	2	3,205,	0,4316	-5.04	-5.96	-1.54	intron (NM_024065, intron 5 of 5)	AluSz|SINE|Alu	11305	NM_024065	79031	Hs.469459	NM_024065	protein-coding
2	27392929	27393280	ENSG00000213453		FTH1P3	ferritin heavy chain 1 pseudogene 3	0.046	-	27392929	27393280	0	1	351,	0	-2.46	-3.07	-1.51	non-coding (NR_002201, exon 1 of 1)	non-coding (NR_002201, exon 1 of 1)	471	NR_002201	2498	Hs.658438	NR_002201	pseudo
2	61839552	61840060	ENSG00000170264	ENSG00000170264	FAM161A	FAM161 centrosomal protein A	0.0019	-	61839552	61840060	0	1	508,	0	-5.34	-6.28	-1.51	exon (NM_001201543, exon 3 of 7)	exon (NM_001201543, exon 3 of 7)	14254	NM_001201543	84140	Hs.440466	NM_032180	protein-coding
2	69993691	69994232	ENSG00000179818	ENSG00000244617	ASPRV1	aspartic peptidase retroviral like 1	0.065	-	69993691	69994232	0	1	541,	0	-2.17	-2.73	-1.5	intron (NR_033872, intron 8 of 10)	intron (NR_033872, intron 8 of 10)	-31697	NM_152792	151516	Hs.516253	NM_152792	protein-coding
2	203427511	203427782	ENSG00000138443	ENSG00000138443	ABI2	abl interactor 2	1e-05	+	203427511	203427782	0	1	271,	0	-10.1	-11.5	-1.5	3' UTR (NM_001282925, exon 11 of 11)	3' UTR (NM_001282925, exon 11 of 11)	60763	NM_001282927	10152	Hs.471156	NM_005759	protein-coding
2	203439864	203440554	ENSG00000173166	ENSG00000138443	ABI2	abl interactor 2	0.035	-	203439864	203440554	0	1	690,	0	-2.71	-3.36	-1.49	exon (NM_213589, exon 14 of 14)	exon (NM_213589, exon 14 of 14)	73325	NM_001282927	10152	Hs.471156	NM_005759	protein-coding
2	165794383	165794682	ENSG00000115339	ENSG00000115339	GALNT3	polypeptide N-acetylgalactosaminyltransferase 3	0.089	-	165794383	165794682	0	1	299,	0	-1.9	-2.42	-1.48	promoter-TSS (NM_004482)	promoter-TSS (NM_004482)	-286	NM_004482	2591	Hs.170986	NM_004482	protein-coding
2	203439865	203440556	ENSG00000138443	ENSG00000138443	ABI2	abl interactor 2	0.037	+	203439865	203440556	0	1	691,	0	-2.66	-3.3	-1.48	exon (NM_213589, exon 14 of 14)	exon (NM_213589, exon 14 of 14)	73327	NM_001282927	10152	Hs.471156	NM_005759	protein-coding
2	238091293	238091594	ENSG00000132330	ENSG00000144488	ESPNL	espin like	0.16	+	238091293	238091594	0	1	301,	0	-1.4	-1.82	-1.48	intron (NM_016510, intron 8 of 11)	intron (NM_016510, intron 8 of 11)	-8896	NM_194312	339768	Hs.127724	NM_194312	protein-coding
2	240630420	240630660	ENSG00000178623	ENSG00000178623	GPR35	G protein-coupled receptor 35	0.049	+	240630420	240630660	0	1	240,	0	-2.41	-3.01	-1.48	exon (NM_001195382, exon 6 of 6)	exon (NM_001195382, exon 6 of 6)	5295	NM_005301	2859	Hs.112218	NM_005301	protein-coding
2	240526353	240526564	ENSG00000144504	ENSG00000144504	ANKMY1	ankyrin repeat and MYND domain containing 1	0.034	-	240526353	240526564	0	1	211,	0	-2.74	-3.39	-1.47	intron (NR_148696, intron 4 of 14)	intron (NR_148696, intron 4 of 14)	31529	NM_017844	51281	Hs.656615	NM_016552	protein-coding
2	85611290	85611649	ENSG00000168887	ENSG00000168887	C2orf68	chromosome 2 open reading frame 68	0.0021	-	85611290	85611649	0	1	359,	0	-5.22	-6.15	-1.44	promoter-TSS (NM_001256728)	promoter-TSS (NM_001256728)	596	NM_001013649	388969	Hs.516159	NM_001013649	protein-coding
2	112542304	112542545	ENSG00000125630		LOC105373562	uncharacterized LOC105373562	0.077	+	112542304	112542545	0	1	241,	0	-2.03	-2.57	-1.44	promoter-TSS (NR_136321)	promoter-TSS (NR_136321)	-213	NR_136321	105373562	Hs.599548	NR_136321	ncRNA
2	43675296	43676263	ENSG00000223658	ENSG00000223658	C1GALT1C1L	C1GALT1 specific chaperone 1 like	0.14	-	43675296	43676263	0	1	967,	0	-1.52	-1.97	-1.43	exon (NM_001101330, exon 1 of 1)	exon (NM_001101330, exon 1 of 1)	649	NM_001101330	728819		NM_001101330	protein-coding
2	54629443	54629684	ENSG00000115306	ENSG00000115306	SPTBN1	spectrin beta, non-erythrocytic 1	6.4e-05	+	54629443	54629684	0	1	241,	0	-8.44	-9.66	-1.42	exon (NM_003128, exon 14 of 36)	exon (NM_003128, exon 14 of 36)	71170	NM_178313	6711	Hs.503178	NM_003128	protein-coding
2	239959636	239959907	ENSG00000130414	ENSG00000264279	MIR4786	microRNA 4786	0.0012	-	239959636	239959907	0	1	271,	0	-5.74	-6.73	-1.42	non-coding (NR_136156, exon 8 of 8)	non-coding (NR_136156, exon 8 of 8)	-16678	NR_039949	100616417		NR_039949	ncRNA
2	172081621	172082430	ENSG00000172878	ENSG00000144355	DLX1	distal-less homeobox 1	0.00059	+	172081621	172082430	0	1	809,	0	-6.37	-7.43	-1.4	non-coding (NR_136276, exon 9 of 9)	non-coding (NR_136276, exon 9 of 9)	-3481	NM_178120	1745	Hs.407015	NM_178120	protein-coding
2	231494944	231495270	ENSG00000283312	ENSG00000181798	LINC00471	long intergenic non-protein coding RNA 471	0.046	-	231494944	231495270	0	1	326,	0	-2.47	-3.08	-1.4	Intergenic	Charlie8|DNA|hAT-Charlie	19232	NR_024079	151477	Hs.375211	NM_173513	ncRNA
2	97113555	97113736	ENSG00000135976	ENSG00000135976	ANKRD36	ankyrin repeat domain 36	0.13	+	97113555	97113736	0	1	181,	0	-1.55	-2.01	-1.39	5' UTR (NM_001354587, exon 1 of 76)	5' UTR (NM_001354587, exon 1 of 76)	493	NM_001354587	375248	Hs.541894	NM_198555	protein-coding
2	143946719	143947050	ENSG00000121964	ENSG00000232377	LOC101928386	uncharacterized LOC101928386	0.024	-	143946719	143947050	0	1	331,	0	-3.02	-3.71	-1.39	non-coding (NR_148872, exon 11 of 11)	non-coding (NR_148872, exon 11 of 11)	9818	NR_110237	101928386	Hs.668251	NR_110237	ncRNA
2	232343629	232344230	ENSG00000144535	ENSG00000163283	ALPP	alkaline phosphatase, placental	0.091	+	232343629	232344230	0	1	601,	0	-1.88	-2.4	-1.39	3' UTR (NM_001257281, exon 14 of 14)	3' UTR (NM_001257281, exon 14 of 14)	-34821	NM_001632	250	Hs.284255	NM_001632	protein-coding
2	46185505	46185865	ENSG00000171132	ENSG00000116016	EPAS1	endothelial PAS domain protein 1	0.11	+	46185505	46185865	0	1	360,	0	-1.75	-2.24	-1.38	3' UTR (NM_005400, exon 15 of 15)	3' UTR (NM_005400, exon 15 of 15)	-111722	NM_001430	2034	Hs.468410	NM_001430	protein-coding
2	46537541	46542348	ENSG00000250565	ENSG00000119729	RHOQ	ras homolog family member Q	0.0027	-	46537541	46542348	0	3	35,789,132,	0,3848,4675	-5.02	-5.93	-1.38	intron (NM_001371283, intron 1 of 3)	L2c|LINE|L2	-2545	NM_012249	23433	Hs.709193	NM_012249	protein-coding
2	97668364	97668684	ENSG00000228486	ENSG00000228486	C2orf92	chromosome 2 open reading frame 92	0.18	+	97668364	97668684	0	2	263,37,	0,283	-1.33	-1.73	-1.37	Intergenic	MLT1B|LTR|ERVL-MaLR	-1219	NR_038386	728537	Hs.469369	NM_001351368	protein-coding
2	181892772	181893012	ENSG00000138434	ENSG00000138434	ITPRID2	ITPR interacting domain containing 2	0.01	+	181892772	181893012	0	1	240,	0	-3.81	-4.6	-1.37	3' UTR (NM_001287505, exon 2 of 2)	3' UTR (NM_001287505, exon 2 of 2)	1162	NM_001130445	6744	Hs.196983	NM_006751	protein-coding
2	219245968	219246238	ENSG00000115661	ENSG00000115661	STK16	serine/threonine kinase 16	0.00083	+	219245968	219246238	0	1	270,	0	-6.06	-7.09	-1.37	promoter-TSS (NM_001286423)	promoter-TSS (NM_001286423)	207	NM_001330214	8576	Hs.153003	NM_003691	protein-coding
2	61842255	61846923	ENSG00000170264	ENSG00000170264	FAM161A	FAM161 centrosomal protein A	0.13	-	61842255	61846923	0	2	105,165,	0,4503	-1.58	-2.04	-1.36	intron (NR_037710, intron 1 of 5)	AluSx1|SINE|Alu	9471	NM_001201543	84140	Hs.440466	NM_032180	protein-coding
2	159938123	159939024	ENSG00000153246	ENSG00000248672	LY75-CD302	LY75-CD302 readthrough	0.12	-	159938123	159939024	0	1	901,	0	-1.65	-2.13	-1.34	3' UTR (NM_001195641, exon 30 of 30)	3' UTR (NM_001195641, exon 30 of 30)	-33818	NM_001198760	100526664	Hs.153563	NM_001198759	protein-coding
2	231493854	231494503	ENSG00000283312	ENSG00000181798	LINC00471	long intergenic non-protein coding RNA 471	0.099	-	231493854	231494503	0	1	649,	0	-1.81	-2.31	-1.34	Intergenic	Charlie8|DNA|hAT-Charlie	20160	NR_024079	151477	Hs.375211	NM_173513	ncRNA
2	60937345	60937522	ENSG00000237522	ENSG00000162924	REL	REL proto-oncogene, NF-kB subunit	0.14	-	60937345	60937522	0	1	177,	0	-1.52	-1.97	-1.33	Intergenic	Intergenic	55860	NM_001291746	5966	Hs.631886	NM_002908	protein-coding
2	127291995	127292145	ENSG00000163161	ENSG00000163161	ERCC3	ERCC excision repair 3, TFIIH core complex helicase subunit	0.12	-	127291995	127292145	0	1	150,	0	-1.65	-2.12	-1.33	intron (NM_001303418, intron 3 of 14)	MLT1A|LTR|ERVL-MaLR	2074	NM_001303418	2071	Hs.469872	NM_000122	protein-coding
2	171784996	171785356	ENSG00000115840	ENSG00000077380	DYNC1I2	dynein cytoplasmic 1 intermediate chain 2	0.00064	-	171784996	171785356	0	1	360,	0	-6.32	-7.36	-1.33	non-coding (NR_047549, exon 17 of 17)	non-coding (NR_047549, exon 17 of 17)	97421	NM_001320884	1781	Hs.546250	NM_001378	protein-coding
2	24029428	24029608	ENSG00000163026	ENSG00000163026	WDCP	WD repeat and coiled coil containing	0.074	-	24029428	24029608	0	1	180,	0	-2.06	-2.61	-1.32	3' UTR (NM_001142319, exon 3 of 3)	3' UTR (NM_001142319, exon 3 of 3)	17873	NM_025203	80304	Hs.24624	NM_025203	protein-coding
2	74474286	74474615	ENSG00000135637	ENSG00000204822	MRPL53	mitochondrial ribosomal protein L53	0.029	-	74474286	74474615	0	1	329,	0	-2.87	-3.54	-1.32	3' UTR (NM_032779, exon 9 of 9)	3' UTR (NM_032779, exon 9 of 9)	-1771	NM_053050	116540	Hs.534527	NM_053050	protein-coding
2	85611450	85612153	ENSG00000168883	ENSG00000168887	C2orf68	chromosome 2 open reading frame 68	0.093	+	85611450	85612153	0	2	130,51,	0,652	-1.86	-2.38	-1.32	promoter-TSS (NM_001256728)	promoter-TSS (NM_001256728)	264	NM_001013649	388969	Hs.516159	NM_001013649	protein-coding
2	203427990	203428231	ENSG00000138443	ENSG00000138443	ABI2	abl interactor 2	0.025	+	203427990	203428231	0	1	241,	0	-2.99	-3.67	-1.32	3' UTR (NM_001282925, exon 11 of 11)	3' UTR (NM_001282925, exon 11 of 11)	61227	NM_001282927	10152	Hs.471156	NM_005759	protein-coding
2	60452168	60452528	ENSG00000119866	ENSG00000228590	MIR4432HG	MIR4432 host gene	1e-08	-	60452168	60452528	0	1	360,	0	-16.7	-18.4	-1.31	3' UTR (NM_018014, exon 5 of 5)	3' UTR (NM_018014, exon 5 of 5)	-60973	NR_132992	106660609	Hs.565545	NR_132991	ncRNA
2	24768243	24768694	ENSG00000084676	ENSG00000138092	CENPO	centromere protein O	0.16	+	24768243	24768694	0	1	451,	0	-1.41	-1.84	-1.3	3' UTR (NM_001362954, exon 24 of 24)	3' UTR (NM_001362954, exon 24 of 24)	-24646	NM_024322	79172	Hs.731569	NM_024322	protein-coding
2	199458542	199465001	ENSG00000119042	ENSG00000119042	SATB2	SATB homeobox 2	0.0041	-	199458542	199465001	0	3	203,81,166,	0,1909,6293	-4.62	-5.5	-1.3	intron (NM_015265, intron 1 of 11)	intron (NM_015265, intron 1 of 11)	3336	NM_001172517	23314	Hs.516617	NM_015265	protein-coding
2	64094564	64095252	ENSG00000197329	ENSG00000197329	PELI1	pellino E3 ubiquitin protein ligase 1	0.0017	-	64094564	64095252	0	1	688,	0	-5.43	-6.39	-1.29	exon (NM_020651, exon 7 of 7)	exon (NM_020651, exon 7 of 7)	49512	NM_020651	57162	Hs.7886	NM_020651	protein-coding
2	73947909	73958153	ENSG00000237883	ENSG00000114956	DGUOK	deoxyguanosine kinase	0.0011	-	73947909	73958153	0	2	26,184,	0,10060	-5.81	-6.81	-1.29	intron (NR_134897, intron 4 of 5)	MSTB2|LTR|ERVL-MaLR	26151	NM_001318859	1716	Hs.469022	NM_001929	protein-coding
2	24030710	24031010	ENSG00000163026	ENSG00000163026	WDCP	WD repeat and coiled coil containing	0.034	-	24030710	24031010	0	1	300,	0	-2.72	-3.37	-1.27	3' UTR (NM_001142319, exon 3 of 3)	3' UTR (NM_001142319, exon 3 of 3)	16531	NM_025203	80304	Hs.24624	NM_025203	protein-coding
2	177221508	177221868	ENSG00000170144	ENSG00000170144	HNRNPA3	heterogeneous nuclear ribonucleoprotein A3	7e-17	+	177221508	177221868	0	1	360,	0	-35	-37.2	-1.27	non-coding (NR_138470, exon 11 of 12)	non-coding (NR_138470, exon 11 of 12)	8894	NR_138470	220988	Hs.516539	NM_194247	protein-coding
2	161160410	161160956	ENSG00000136560	ENSG00000136560	TANK	TRAF family member associated NFKB activator	0.009	+	161160410	161160956	0	3	76,97,8,	0,315,538	-3.91	-4.71	-1.26	intron (NM_001199135, intron 1 of 7)	CpG	255	NM_001199135	10010	Hs.132257	NM_004180	protein-coding
2	206085973	206086303	ENSG00000114933	ENSG00000114933	INO80D	INO80 complex subunit D	0.0029	-	206085973	206086303	0	1	330,	0	-4.93	-5.83	-1.26	promoter-TSS (NM_017759)	promoter-TSS (NM_017759)	36	NM_017759	54891	Hs.445036	NM_017759	protein-coding
2	63588392	63588723	ENSG00000143951	ENSG00000143951	WDPCP	WD repeat containing planar cell polarity effector	0.099	-	63588392	63588723	0	1	331,	0	-1.81	-2.31	-1.24	promoter-TSS (NM_015910)	promoter-TSS (NM_015910)	-81	NR_148705	51057	Hs.414952	NM_015910	protein-coding
2	71124209	71124446	ENSG00000124370	ENSG00000124370	MCEE	methylmalonyl-CoA epimerase	0.00026	-	71124209	71124446	0	1	237,	0	-7.12	-8.24	-1.24	exon (NM_032601, exon 2 of 3)	exon (NM_032601, exon 2 of 3)	5901	NM_032601	84693	Hs.94949	NM_032601	protein-coding
2	178604045	178604778	ENSG00000155657	ENSG00000237298	TTN-AS1	TTN antisense RNA 1	0.13	-	178604045	178604778	0	2	260,71,	0,662	-1.57	-2.03	-1.24	intron (NM_001256850, intron 231 of 312)	intron (NM_001256850, intron 231 of 312)	81221	NR_038271	100506866	Hs.710694	NR_038271	ncRNA
2	231528733	231530375	ENSG00000171596	ENSG00000171596	NMUR1	neuromedin U receptor 1	0.015	-	231528733	231530375	0	2	284,17,	0,1625	-3.49	-4.23	-1.24	intron (NM_006056, intron 1 of 2)	intron (NM_006056, intron 1 of 2)	891	NM_006056	10316	Hs.471619	NM_006056	protein-coding
2	189747077	189750549	ENSG00000128694		OSGEPL1-AS1	OSGEPL1 antisense RNA 1	0.0058	-	189747077	189750549	0	2	254,16,	0,3456	-4.31	-5.15	-1.22	intron (NR_148883, intron 8 of 8)	intron (NR_148883, intron 8 of 8)	-13967	NR_102429	101409258	Hs.738558	NR_102429	ncRNA
2	3559534	3561715	ENSG00000234171	ENSG00000234171	RNASEH1-AS1	RNASEH1 antisense RNA 1	0.0037	+	3559534	3561715	0	2	195,399,	0,1782	-4.71	-5.59	-1.21	intron (NR_038430, intron 2 of 2)	(TCTT)n|Simple_repeat|Simple_repeat	2238	NR_038431	100506054	Hs.606550	NR_038429	ncRNA
2	68156929	68157110	ENSG00000243667	ENSG00000243667	WDR92	WD repeat domain 92	0.11	-	68156929	68157110	0	1	181,	0	-1.72	-2.2	-1.2	promoter-TSS (NM_001329917)	promoter-TSS (NM_001329917)	507	NM_001256476	116143	Hs.631877	NM_138458	protein-coding
2	177551485	177552085	ENSG00000196659	ENSG00000196659	TTC30B	tetratricopeptide repeat domain 30B	0.086	-	177551485	177552085	0	1	600,	0	-1.92	-2.45	-1.2	exon (NM_152517, exon 1 of 1)	exon (NM_152517, exon 1 of 1)	1011	NM_152517	150737	Hs.447659	NM_152517	protein-coding
2	27082961	27083201	ENSG00000138080	ENSG00000138030	KHK	ketohexokinase	0.078	+	27082961	27083201	0	1	240,	0	-2.01	-2.55	-1.18	exon (NM_007046, exon 4 of 8)	exon (NM_007046, exon 4 of 8)	-3691	NM_006488	3795	Hs.567297	NM_000221	protein-coding
2	169735059	169736168	ENSG00000213160	ENSG00000213160	KLHL23	kelch like family member 23	0.037	+	169735059	169736168	0	1	1109,	0	-2.66	-3.3	-1.18	exon (NM_144711, exon 2 of 4)	exon (NM_144711, exon 2 of 4)	1782	NM_144711	151230	Hs.655150	NM_144711	protein-coding
2	26187713	26187954	ENSG00000157833	ENSG00000157833	GAREM2	GRB2 associated regulator of MAPK1 subtype 2	0.15	+	26187713	26187954	0	1	241,	0	-1.44	-1.87	-1.17	exon (NM_001191033, exon 6 of 6)	exon (NM_001191033, exon 6 of 6)	7118	NM_001191033	150946	Hs.187912	NM_001168241	protein-coding
2	23927314	23939598	ENSG00000173960	ENSG00000119778	ATAD2B	ATPase family AAA domain containing 2B	0.1	+	23927314	23939598	0	2	301,59,	0,12225	-1.78	-2.27	-1.16	Intergenic	AluSp|SINE|Alu	-6333	NM_001354107	54454	Hs.467862	NM_017552	protein-coding
2	27085777	27086408	ENSG00000138080	ENSG00000138030	KHK	ketohexokinase	0.038	+	27085777	27086408	0	1	631,	0	-2.63	-3.26	-1.15	promoter-TSS (NM_006488)	promoter-TSS (NM_006488)	-679	NM_006488	3795	Hs.567297	NM_000221	protein-coding
2	46184786	46185416	ENSG00000171132	ENSG00000116016	EPAS1	endothelial PAS domain protein 1	0.17	+	46184786	46185416	0	1	630,	0	-1.37	-1.78	-1.15	3' UTR (NM_005400, exon 15 of 15)	3' UTR (NM_005400, exon 15 of 15)	-112306	NM_001430	2034	Hs.468410	NM_001430	protein-coding
2	96241907	96242145	ENSG00000204685	ENSG00000135956	TMEM127	transmembrane protein 127	0.0082	+	96241907	96242145	0	1	238,	0	-3.99	-4.8	-1.15	non-coding (NR_046322, exon 4 of 4)	non-coding (NR_046322, exon 4 of 4)	23971	NM_001193304	55654	Hs.164303	NM_017849	protein-coding
2	178538699	178539866	ENSG00000155657	ENSG00000237298	TTN-AS1	TTN antisense RNA 1	5.1e-05	-	178538699	178539866	0	3	140,306,485,	0,246,682	-8.65	-9.89	-1.14	non-coding (NR_038272, exon 5 of 17)	non-coding (NR_038272, exon 5 of 17)	16092	NR_038271	100506866	Hs.710694	NR_038271	ncRNA
2	190659205	190659986	ENSG00000138386	ENSG00000138386	NAB1	NGFI-A binding protein 1	0.00017	+	190659205	190659986	0	1	781,	0	-7.53	-8.68	-1.14	exon (NM_005966, exon 4 of 10)	exon (NM_005966, exon 4 of 10)	438	NM_001321315	4664	Hs.107474	NM_005966	protein-coding
2	27861535	27870507	ENSG00000171174	ENSG00000158019	BABAM2	BRISC and BRCA1 A complex member 2	0.069	-	27861535	27870507	0	2	11,736,	0,8236	-2.12	-2.68	-1.12	intron (NM_022128, intron 1 of 7)	L1MEf|LINE|L1	-22688	NM_001329112	9577	Hs.258314	NM_004899	protein-coding
2	54629203	54629264	ENSG00000115306	ENSG00000115306	SPTBN1	spectrin beta, non-erythrocytic 1	0.13	+	54629203	54629264	0	1	61,	0	-1.55	-2.01	-1.12	exon (NM_003128, exon 14 of 36)	exon (NM_003128, exon 14 of 36)	70840	NM_178313	6711	Hs.503178	NM_003128	protein-coding
2	118014293	118015013	ENSG00000279227	ENSG00000125633	CCDC93	coiled-coil domain containing 93	0.054	+	118014293	118015013	0	1	720,	0	-2.33	-2.92	-1.12	promoter-TSS (NM_019044)	promoter-TSS (NM_019044)	-583	NM_019044	54520	Hs.107845	NM_019044	protein-coding
2	121650577	121651497	ENSG00000236859	ENSG00000236859	NIFK-AS1	NIFK antisense RNA 1	4.6e-08	+	121650577	121651497	0	1	920,	0	-15.3	-16.9	-1.11	non-coding (NR_037856, exon 3 of 3)	non-coding (NR_037856, exon 3 of 3)	1048	NR_037856	254128	Hs.712685	NR_037856	ncRNA
2	156329820	156330149	ENSG00000153234	ENSG00000153234	NR4A2	nuclear receptor subfamily 4 group A member 2	0.11	-	156329820	156330149	0	1	329,	0	-1.72	-2.2	-1.11	exon (NM_006186, exon 3 of 8)	exon (NM_006186, exon 3 of 8)	2736	NM_006186	4929	Hs.563344	NM_006186	protein-coding
2	70048825	70049063	ENSG00000179818	ENSG00000179818	PCBP1-AS1	PCBP1 antisense RNA 1	0.15	-	70048825	70049063	0	2	132,19,	0,219	-1.47	-1.9	-1.09	intron (NR_033872, intron 6 of 10)	MLT1C|LTR|ERVL-MaLR	38071	NR_033872	400960	Hs.683864	NR_033872	ncRNA
2	105265824	105266303	ENSG00000135966	ENSG00000135973	GPR45	G protein-coupled receptor 45	0.00036	-	105265824	105266303	0	1	479,	0	-6.85	-7.94	-1.09	non-coding (NR_137328, exon 13 of 13)	non-coding (NR_137328, exon 13 of 13)	24321	NM_007227	11250	Hs.590903	NM_007227	protein-coding
2	128266890	128267219	ENSG00000136720	ENSG00000136720	HS6ST1	heparan sulfate 6-O-sulfotransferase 1	0.061	-	128266890	128267219	0	1	329,	0	-2.22	-2.79	-1.09	3' UTR (NM_004807, exon 2 of 2)	3' UTR (NM_004807, exon 2 of 2)	51813	NM_004807	9394	Hs.512841	NM_004807	protein-coding
2	172595912	172596123	ENSG00000152256	ENSG00000152256	PDK1	pyruvate dehydrogenase kinase 1	0.0017	+	172595912	172596123	0	1	211,	0	-5.44	-6.39	-1.09	non-coding (NR_103729, exon 11 of 12)	non-coding (NR_103729, exon 11 of 12)	39928	NM_001278549	5163	Hs.470633	NM_002610	protein-coding
2	96705928	96706465	ENSG00000114988	ENSG00000114988	LMAN2L	lectin, mannose binding 2 like	0.00055	-	96705928	96706465	0	1	537,	0	-6.45	-7.51	-1.08	3' UTR (NM_001142292, exon 9 of 9)	3' UTR (NM_001142292, exon 9 of 9)	33879	NM_001142292	81562	Hs.655743	NM_030805	protein-coding
2	96842498	96848301	ENSG00000213337	ENSG00000163126	ANKRD23	ankyrin repeat domain 23	0.061	-	96842498	96848301	0	2	13,317,	0,5486	-2.23	-2.8	-1.08	Intergenic	AluSx3|SINE|Alu	-1379	NM_144994	200539	Hs.643430	NM_144994	protein-coding
2	24096320	24096801	ENSG00000219626	ENSG00000115129	TP53I3	tumor protein p53 inducible protein 3	0.0019	+	24096320	24096801	0	1	481,	0	-5.3	-6.24	-1.07	intron (NR_111929, intron 3 of 5)	L1PA6|LINE|L1	-11346	NM_147184	9540	Hs.50649	NM_004881	protein-coding
2	111767838	111768558	ENSG00000153107	ENSG00000264793	MIR4771-1	microRNA 4771-1	0.11	-	111767838	111768558	0	1	720,	0	-1.73	-2.21	-1.06	3' UTR (NM_022662, exon 48 of 48)	3' UTR (NM_022662, exon 48 of 48)	2936	NR_039928	100616370		NR_039928	ncRNA
2	201138641	201138879	ENSG00000232133	ENSG00000003402	CFLAR	CASP8 and FADD like apoptosis regulator	0.08	-	201138641	201138879	0	1	238,	0	-1.98	-2.52	-1.06	3' UTR (NM_001308043, exon 5 of 5)	3' UTR (NM_001308043, exon 5 of 5)	-1515	NM_001202515	8837	Hs.390736	NM_003879	protein-coding
2	55283955	55284492	ENSG00000162997	ENSG00000162997	PRORSD1P	prolyl-tRNA synthetase associated domain containing 1, pseudogene	0.065	+	55283955	55284492	0	1	537,	0	-2.17	-2.73	-1.05	non-coding (NR_027258, exon 1 of 1)	non-coding (NR_027258, exon 1 of 1)	1905	NR_027258	344405	Hs.445292	NM_001080459	pseudo
2	74932746	74938388	ENSG00000204792	ENSG00000115350	POLE4	DNA polymerase epsilon 4, accessory subunit	0.1	+	74932746	74938388	0	2	278,81,	0,5561	-1.8	-2.3	-1.05	intron (NR_125792, intron 4 of 4)	L2a|LINE|L2	-23076	NM_019896	56655	Hs.469060	NM_019896	protein-coding
2	165770242	165771296	ENSG00000115339	ENSG00000115339	GALNT3	polypeptide N-acetylgalactosaminyltransferase 3	0.0036	-	165770242	165771296	0	2	566,32,	0,1022	-4.74	-5.63	-1.05	5' UTR (NM_004482, exon 2 of 11)	5' UTR (NM_004482, exon 2 of 11)	23478	NM_004482	2591	Hs.170986	NM_004482	protein-coding
2	201138623	201138864	ENSG00000003402	ENSG00000003402	CFLAR	CASP8 and FADD like apoptosis regulator	0.083	+	201138623	201138864	0	1	241,	0	-1.96	-2.49	-1.05	3' UTR (NM_001308043, exon 5 of 5)	3' UTR (NM_001308043, exon 5 of 5)	-1531	NM_001202515	8837	Hs.390736	NM_003879	protein-coding
2	3388136	3388436	ENSG00000171853	ENSG00000171853	TRAPPC12	trafficking protein particle complex 12	0.013	+	3388136	3388436	0	1	300,	0	-3.6	-4.37	-1.04	exon (NM_016030, exon 2 of 12)	exon (NM_016030, exon 2 of 12)	8592	NM_016030	51112	Hs.252713	NM_016030	protein-coding
2	241099396	241101204	ENSG00000122085	ENSG00000122085	MTERF4	mitochondrial transcription termination factor 4	6.6e-05	-	241099396	241101204	0	2	498,41,	0,1767	-8.41	-9.62	-1.03	intron (NM_182501, intron 1 of 3)	Tigger2a|DNA|TcMar-Tigger	1987	NM_182501	130916	Hs.159556	NM_182501	protein-coding
2	55218597	55224003	ENSG00000162994	ENSG00000143947	RPS27A	ribosomal protein S27a	0.04	-	55218597	55224003	0	3	3,259,8,	0,3637,5398	-2.59	-3.21	-1.02	intron (NM_001353782, intron 1 of 9)	intron (NM_001353782, intron 1 of 9)	-10603	NM_001135592	6233	Hs.311640	NM_002954	protein-coding
2	19913698	19930444	ENSG00000118965	ENSG00000183891	TTC32	tetratricopeptide repeat domain 32	0.038	-	19913698	19930444	0	3	10,241,49,	0,338,16697	-2.63	-3.26	-1.01	intron (NM_001006657, intron 26 of 27)	L1PA7|LINE|L1	-20088	NM_001008237	130502	Hs.591547	NM_001008237	protein-coding
2	53700282	53714528	ENSG00000115239	ENSG00000143942	CHAC2	ChaC cation transport regulator homolog 2	3e-05	-	53700282	53714528	0	2	246,145,	0,14101	-9.09	-10.4	-1.01	intron (NM_001201965, intron 6 of 8)	AluY|SINE|Alu	-60378	NM_001346127	494143	Hs.585944	NM_001008708	protein-coding
2	73986403	73993358	ENSG00000187605	ENSG00000187605	TET3	tet methylcytosine dioxygenase 3	0.0018	+	73986403	73993358	0	2	303,147,	0,6808	-5.35	-6.3	-1.01	intron (NM_001287491, intron 2 of 11)	MIRb|SINE|MIR	4971	NM_001287491	200424	Hs.208546	NM_001287491	protein-coding
2	189670443	189670771	ENSG00000138381	ENSG00000151687	ANKAR	ankyrin and armadillo repeat containing	3.4e-07	+	189670443	189670771	0	1	328,	0	-13.4	-14.9	-0.995	exon (NM_001353497, exon 5 of 5)	exon (NM_001353497, exon 5 of 5)	-5378	NM_144708	150709	Hs.60772	NM_144708	protein-coding
2	189755156	189761493	ENSG00000128694		OSGEPL1-AS1	OSGEPL1 antisense RNA 1	0.0028	-	189755156	189761493	0	2	404,74,	0,6263	-4.96	-5.87	-0.986	intron (NM_022353, intron 2 of 8)	AluSp|SINE|Alu	-4455	NR_102429	101409258	Hs.738558	NR_102429	ncRNA
2	3387686	3387987	ENSG00000171853	ENSG00000171853	TRAPPC12	trafficking protein particle complex 12	0.025	+	3387686	3387987	0	1	301,	0	-3	-3.68	-0.982	exon (NM_016030, exon 2 of 12)	exon (NM_016030, exon 2 of 12)	8143	NM_016030	51112	Hs.252713	NM_016030	protein-coding
2	24769652	24770312	ENSG00000084676	ENSG00000138092	CENPO	centromere protein O	0.17	+	24769652	24770312	0	1	660,	0	-1.36	-1.78	-0.974	3' UTR (NM_001362954, exon 24 of 24)	3' UTR (NM_001362954, exon 24 of 24)	-23133	NM_024322	79172	Hs.731569	NM_024322	protein-coding
2	96326699	96328877	ENSG00000198885	ENSG00000198885	ITPRIPL1	ITPRIP like 1	0.046	+	96326699	96328877	0	1	2178,	0	-2.47	-3.08	-0.97	exon (NM_178495, exon 1 of 1)	exon (NM_178495, exon 1 of 1)	1573	NM_178495	150771	Hs.65009	NM_178495	protein-coding
2	85606653	85606982	ENSG00000168887	ENSG00000168883	USP39	ubiquitin specific peptidase 39	0.0014	-	85606653	85606982	0	1	329,	0	-5.6	-6.58	-0.969	3' UTR (NM_001013649, exon 4 of 4)	3' UTR (NM_001013649, exon 4 of 4)	3957	NR_046347	10713	Hs.654745	NM_006590	protein-coding
2	113132821	113133299	ENSG00000136689	ENSG00000136689	IL1RN	interleukin 1 receptor antagonist	8.3e-06	+	113132821	113133299	0	1	478,	0	-10.3	-11.7	-0.969	3' UTR (NM_173843, exon 6 of 6)	3' UTR (NM_173843, exon 6 of 6)	5462	NM_173842	3557	Hs.81134	NM_000577	protein-coding
2	169698289	169701292	ENSG00000144362	ENSG00000213160	PHOSPHO2-KLHL23	PHOSPHO2-KLHL23 readthrough	0.061	+	169698289	169701292	0	2	11,347,	0,2656	-2.22	-2.8	-0.965	intron (NM_001199288, intron 3 of 3)	L1PA11|LINE|L1	5322	NM_001199290	100526832		NM_001199290	protein-coding
2	24032943	24049575	ENSG00000163026	ENSG00000163026	WDCP	WD repeat and coiled coil containing	1.8e-05	-	24032943	24049575	0	4	3,1836,48,22,	0,4733,14370,16610	-9.55	-10.9	-0.964	intron (NM_025203, intron 1 of 3)	AluSq2|SINE|Alu	6132	NM_025203	80304	Hs.24624	NM_025203	protein-coding
2	101871555	101873667	ENSG00000071054		LINC01127	long intergenic non-protein coding RNA 1127	3.4e-06	+	101871555	101873667	0	2	130,21,	0,2091	-11.2	-12.6	-0.953	intron (NM_145686, intron 22 of 30)	intron (NM_145686, intron 22 of 30)	-110854	NR_103791	100506328	Hs.516245	NR_103791	ncRNA
2	96593169	96593949	ENSG00000114982	ENSG00000114982	KANSL3	KAT8 regulatory NSL complex subunit 3	1.3e-16	-	96593169	96593949	0	1	780,	0	-34.4	-36.6	-0.952	non-coding (NR_047657, exon 21 of 21)	non-coding (NR_047657, exon 21 of 21)	44432	NR_047658	55683	Hs.516341	NM_017991	protein-coding
2	74481825	74482423	ENSG00000135637	ENSG00000135637	CCDC142	coiled-coil domain containing 142	0.14	-	74481825	74482423	0	1	598,	0	-1.52	-1.97	-0.948	promoter-TSS (NM_022492)	promoter-TSS (NM_022492)	874	NM_032779	84865	Hs.430199	NM_032779	protein-coding
2	173267619	173267950	ENSG00000091436	ENSG00000238133	MAP3K20-AS1	MAP3K20 antisense RNA 1	0.033	+	173267619	173267950	0	1	331,	0	-2.76	-3.42	-0.943	3' UTR (NM_016653, exon 20 of 20)	3' UTR (NM_016653, exon 20 of 20)	14251	NR_033882	339751	Hs.570083	NR_033882	ncRNA
2	53700311	53714527	ENSG00000270898	ENSG00000143942	CHAC2	ChaC cation transport regulator homolog 2	1.2e-05	-	53700311	53714527	0	2	217,144,	0,14072	-9.96	-11.3	-0.941	intron (NM_001201965, intron 6 of 8)	AluY|SINE|Alu	-60364	NM_001346127	494143	Hs.585944	NM_001008708	protein-coding
2	96326707	96328353	ENSG00000198885	ENSG00000198885	ITPRIPL1	ITPRIP like 1	0.076	+	96326707	96328353	0	1	1646,	0	-2.04	-2.58	-0.933	exon (NM_178495, exon 1 of 1)	exon (NM_178495, exon 1 of 1)	1315	NM_178495	150771	Hs.65009	NM_178495	protein-coding
2	159898732	159898972	ENSG00000248672	ENSG00000054219	LY75	lymphocyte antigen 75	0.03	-	159898732	159898972	0	1	240,	0	-2.84	-3.51	-0.929	exon (NM_001198759, exon 2 of 39)	exon (NM_001198759, exon 2 of 39)	5904	NM_002349	4065	Hs.153563	NM_002349	protein-coding
2	55617473	55617803	ENSG00000275052	ENSG00000275052	PPP4R3B	protein phosphatase 4 regulatory subunit 3B	0.016	-	55617473	55617803	0	1	330,	0	-3.42	-4.16	-0.924	promoter-TSS (NM_001282850)	promoter-TSS (NM_001282850)	-16	NM_020463	57223	Hs.516182	NM_020463	protein-coding
2	206085790	206086534	ENSG00000227946	ENSG00000114933	INO80D	INO80 complex subunit D	0.0016	+	206085790	206086534	0	2	13,578,	0,166	-5.48	-6.45	-0.923	promoter-TSS (NM_017759)	promoter-TSS (NM_017759)	12	NM_017759	54891	Hs.445036	NM_017759	protein-coding
2	219374034	219374304	ENSG00000123992	ENSG00000123992	DNPEP	aspartyl aminopeptidase	0.053	-	219374034	219374304	0	1	270,	0	-2.34	-2.93	-0.92	TTS (NM_001319121)	TTS (NM_001319121)	13193	NM_001319118	23549	Hs.258551	NM_012100	protein-coding
2	218698673	218699033	ENSG00000163482	ENSG00000135912	TTLL4	tubulin tyrosine ligase like 4	0.038	+	218698673	218699033	0	1	360,	0	-2.63	-3.27	-0.919	exon (NM_001243313, exon 26 of 27)	exon (NM_001243313, exon 26 of 27)	-11982	NM_014640	9654	Hs.471405	NM_014640	protein-coding
2	127702194	127702972	ENSG00000173349	ENSG00000173349	SFT2D3	SFT2 domain containing 3	0.00017	+	127702194	127702972	0	1	778,	0	-7.53	-8.68	-0.917	3' UTR (NM_018383, exon 22 of 22)	3' UTR (NM_018383, exon 22 of 22)	1086	NM_032740	84826	Hs.345849	NM_032740	protein-coding
2	69829909	69830089	ENSG00000087338	ENSG00000087338	GMCL1	germ cell-less 1, spermatogenesis associated	0.061	+	69829909	69830089	0	1	180,	0	-2.23	-2.8	-0.916	exon (NM_178439, exon 1 of 14)	exon (NM_178439, exon 1 of 14)	339	NM_178439	64395	Hs.293971	NM_178439	protein-coding
2	127702191	127702972	ENSG00000136709	ENSG00000173349	SFT2D3	SFT2 domain containing 3	0.00019	-	127702191	127702972	0	1	781,	0	-7.44	-8.59	-0.915	3' UTR (NM_018383, exon 22 of 22)	3' UTR (NM_018383, exon 22 of 22)	1085	NM_032740	84826	Hs.345849	NM_032740	protein-coding
2	159898725	159898965	ENSG00000054219	ENSG00000054219	LY75	lymphocyte antigen 75	0.031	-	159898725	159898965	0	1	240,	0	-2.82	-3.48	-0.905	exon (NM_001198759, exon 2 of 39)	exon (NM_001198759, exon 2 of 39)	5911	NM_002349	4065	Hs.153563	NM_002349	protein-coding
2	197705906	197707341	ENSG00000247626	ENSG00000247626	MARS2	methionyl-tRNA synthetase 2, mitochondrial	0.00025	+	197705906	197707341	0	1	1435,	0	-7.19	-8.31	-0.905	exon (NM_138395, exon 1 of 1)	exon (NM_138395, exon 1 of 1)	1255	NM_138395	92935	Hs.744330	NM_138395	protein-coding
2	178538345	178539853	ENSG00000237298	ENSG00000237298	TTN-AS1	TTN antisense RNA 1	0.00041	+	178538345	178539853	0	2	14,1156,	0,352	-6.71	-7.79	-0.901	exon (NM_133432, exon 182 of 192)	exon (NM_133432, exon 182 of 192)	15908	NR_038271	100506866	Hs.710694	NR_038271	ncRNA
2	95181841	95182469	ENSG00000275111	ENSG00000275111	ZNF2	zinc finger protein 2	0.0016	+	95181841	95182469	0	1	628,	0	-5.48	-6.44	-0.897	3' UTR (NM_001291605, exon 5 of 5)	3' UTR (NM_001291605, exon 5 of 5)	16346	NM_001282398	7549	Hs.590916	NM_021088	protein-coding
2	24918399	24918969	ENSG00000138031	ENSG00000138031	ADCY3	adenylate cyclase 3	0.032	-	24918399	24918969	0	1	570,	0	-2.79	-3.45	-0.893	exon (NM_004036, exon 2 of 22)	exon (NM_004036, exon 2 of 22)	1553	NM_004036	109	Hs.467898	NM_004036	protein-coding
2	159230412	159231401	ENSG00000115183	ENSG00000275141	MIR6888	microRNA 6888	0.18	+	159230412	159231401	0	1	989,	0	-1.32	-1.73	-0.883	exon (NM_033394, exon 27 of 27)	exon (NM_033394, exon 27 of 27)	44072	NR_106948	102465535		NR_106948	ncRNA
2	55617862	55618310	ENSG00000275052	ENSG00000275052	PPP4R3B	protein phosphatase 4 regulatory subunit 3B	0.096	-	55617862	55618310	0	2	116,245,	0,203	-1.83	-2.34	-0.882	promoter-TSS (NM_001282850)	promoter-TSS (NM_001282850)	-464	NM_020463	57223	Hs.516182	NM_020463	protein-coding
2	74120679	74121721	ENSG00000257800	ENSG00000163170	BOLA3	bolA family member 3	0.0014	+	74120679	74121721	0	1	1042,	0	-5.59	-6.56	-0.873	Intergenic	Intergenic	26712	NM_212552	388962	Hs.61472	NM_212552	protein-coding
2	241442243	241442544	ENSG00000006607	ENSG00000263752	MIR3133	microRNA 3133	0.0059	+	241442243	241442544	0	1	301,	0	-4.29	-5.14	-0.869	intron (NM_014808, intron 13 of 26)	intron (NM_014808, intron 13 of 26)	-35511	NR_036083	100422942		NR_036083	ncRNA
2	241720321	241721612	ENSG00000168395	ENSG00000180902	D2HGDH	D-2-hydroxyglutarate dehydrogenase	0.0043	+	241720321	241721612	0	1	1291,	0	-4.57	-5.44	-0.861	3' UTR (NM_001330161, exon 8 of 8)	3' UTR (NM_001330161, exon 8 of 8)	-13663	NM_001287249	728294	Hs.516813	NM_152783	protein-coding
2	241106278	241106488	ENSG00000115687	ENSG00000122085	MTERF4	mitochondrial transcription termination factor 4	0.027	-	241106278	241106488	0	1	210,	0	-2.95	-3.63	-0.854	3' UTR (NM_001252120, exon 19 of 19)	3' UTR (NM_001252120, exon 19 of 19)	-4051	NR_028051	130916	Hs.159556	NM_182501	protein-coding
2	63045496	63045677	ENSG00000115504	ENSG00000231609	LOC100132215	uncharacterized LOC100132215	0.082	+	63045496	63045677	0	1	181,	0	-1.97	-2.5	-0.85	3' UTR (NM_001354221, exon 25 of 25)	3' UTR (NM_001354221, exon 25 of 25)	2124	NR_027069	100132215	Hs.656781	NR_027069	ncRNA
2	262559	263434	ENSG00000035115	ENSG00000035115	SH3YL1	SH3 and SYLF domain containing 1	0.066	-	262559	263434	0	2	227,224,	0,651	-2.15	-2.72	-0.848	promoter-TSS (NR_104226)	promoter-TSS (NR_104226)	-211	NR_104226	26751	Hs.515951	NM_015677	protein-coding
2	23706994	23707444	ENSG00000119771	ENSG00000119778	ATAD2B	ATPase family AAA domain containing 2B	0.096	+	23706994	23707444	0	1	450,	0	-1.83	-2.34	-0.83	3' UTR (NM_052920, exon 14 of 14)	3' UTR (NM_052920, exon 14 of 14)	219904	NM_017552	54454	Hs.467862	NM_017552	protein-coding
2	156325445	156326191	ENSG00000153234	ENSG00000153234	NR4A2	nuclear receptor subfamily 4 group A member 2	0.035	-	156325445	156326191	0	2	555,42,	0,704	-2.69	-3.34	-0.826	exon (NM_006186, exon 8 of 8)	exon (NM_006186, exon 8 of 8)	6903	NM_006186	4929	Hs.563344	NM_006186	protein-coding
2	96706672	96707328	ENSG00000114988	ENSG00000114988	LMAN2L	lectin, mannose binding 2 like	0.0019	-	96706672	96707328	0	1	656,	0	-5.34	-6.29	-0.824	3' UTR (NM_001142292, exon 9 of 9)	3' UTR (NM_001142292, exon 9 of 9)	33076	NM_001142292	81562	Hs.655743	NM_030805	protein-coding
2	219224482	219224722	ENSG00000198925	ENSG00000198925	ATG9A	autophagy related 9A	0.0046	-	219224482	219224722	0	1	240,	0	-4.51	-5.38	-0.823	non-coding (NR_104255, exon 8 of 16)	non-coding (NR_104255, exon 8 of 16)	5034	NM_024085	79065	Hs.323363	NM_024085	protein-coding
2	201241159	201242028	ENSG00000064012	ENSG00000064012	CASP8	caspase 8	0.0038	+	201241159	201242028	0	1	869,	0	-4.69	-5.57	-0.822	intron (NM_033355, intron 2 of 9)	L1M3|LINE|L1	8131	NM_001080124	841	Hs.599762	NM_001228	protein-coding
2	85356947	85357278	ENSG00000115459	ENSG00000115459	ELMOD3	ELMO domain containing 3	0.048	+	85356947	85357278	0	1	331,	0	-2.44	-3.04	-0.819	non-coding (NR_138133, exon 2 of 12)	non-coding (NR_138133, exon 2 of 12)	2344	NM_001135023	84173	Hs.269990	NM_032213	protein-coding
2	63404174	63404534	ENSG00000143951	ENSG00000143951	WDPCP	WD repeat containing planar cell polarity effector	0.093	-	63404174	63404534	0	1	360,	0	-1.86	-2.37	-0.815	exon (NM_015910, exon 10 of 18)	exon (NM_015910, exon 10 of 18)	33653	NR_122106	51057	Hs.414952	NM_015910	protein-coding
2	144513367	144513668	ENSG00000169554	ENSG00000238057	ZEB2-AS1	ZEB2 antisense RNA 1	0.033	-	144513367	144513668	0	1	301,	0	-2.75	-3.4	-0.81	non-coding (NR_033258, exon 3 of 3)	non-coding (NR_033258, exon 3 of 3)	-6096	NR_040248	100303491	Hs.560789	NR_040248	ncRNA
2	39768437	39768647	ENSG00000138050	ENSG00000138050	THUMPD2	THUMP domain containing 2	0.13	-	39768437	39768647	0	1	210,	0	-1.57	-2.03	-0.806	intron (NR_135663, intron 2 of 9)	intron (NR_135663, intron 2 of 9)	10716	NM_025264	80745	Hs.468254	NM_025264	protein-coding
2	74460283	74460404	ENSG00000274049	ENSG00000239779	WBP1	WW domain binding protein 1	0.066	+	74460283	74460404	0	1	121,	0	-2.16	-2.72	-0.803	TTS (NM_006302)	TTS (NM_006302)	1906	NM_012477	23559	Hs.516114	NM_012477	protein-coding
2	74928343	74929239	ENSG00000204792	ENSG00000204792	LINC01291	long intergenic non-protein coding RNA 1291	0.00067	+	74928343	74929239	0	1	896,	0	-6.27	-7.31	-0.795	intron (NR_125792, intron 1 of 4)	MLT1G1|LTR|ERVL-MaLR	19660	NR_125792	102724515	Hs.708649	NR_125792	ncRNA
2	158681111	158681591	ENSG00000144283	ENSG00000204380	PKP4-AS1	PKP4 antisense RNA 1	0.0016	+	158681111	158681591	0	1	480,	0	-5.45	-6.41	-0.788	3' UTR (NM_003628, exon 22 of 22)	3' UTR (NM_003628, exon 22 of 22)	53651	NR_135242	100129029	Hs.630724	NR_135242	ncRNA
2	47483095	47510085	ENSG00000095002	ENSG00000235760	HCG2040054	uncharacterized LOC644093	0.027	+	47483095	47510085	0	2	133,48,	0,26942	-2.92	-3.6	-0.785	Intergenic	MER21C|LTR|ERVL	-30947	NR_120602	644093	Hs.734158	NR_120602	ncRNA
2	68147544	68157537	ENSG00000273398	ENSG00000243667	WDR92	WD repeat domain 92	0.1	-	68147544	68157537	0	2	23,277,	0,9716	-1.8	-2.3	-0.781	intron (NR_046234, intron 1 of 6)	intron (NR_046234, intron 1 of 6)	4986	NM_001256476	116143	Hs.631877	NM_138458	protein-coding
2	68130686	68131347	ENSG00000243667	ENSG00000243667	WDR92	WD repeat domain 92	0.021	-	68130686	68131347	0	1	661,	0	-3.18	-3.88	-0.78	3' UTR (NM_138458, exon 8 of 8)	3' UTR (NM_138458, exon 8 of 8)	26510	NM_001256476	116143	Hs.631877	NM_138458	protein-coding
2	101028525	101029657	ENSG00000204634	ENSG00000071082	RPL31	ribosomal protein L31	0.021	-	101028525	101029657	0	2	14,167,	0,965	-3.15	-3.86	-0.777	intron (NM_001102426, intron 12 of 19)	intron (NM_001102426, intron 12 of 19)	26802	NM_000993	6160	Hs.469473	NM_000993	protein-coding
2	38733700	38733791	ENSG00000143891	ENSG00000115875	SRSF7	serine and arginine rich splicing factor 7	0.014	+	38733700	38733791	0	1	91,	0	-3.51	-4.26	-0.776	3' UTR (NM_138801, exon 7 of 7)	3' UTR (NM_138801, exon 7 of 7)	17615	NM_001031684	6432	Hs.309090	NM_006276	protein-coding
2	86140777	86141557	ENSG00000132300	ENSG00000208772	SNORD94	small nucleolar RNA, C/D box 94	0.015	+	86140777	86141557	0	1	780,	0	-3.48	-4.23	-0.771	3' UTR (NM_017952, exon 24 of 24)	3' UTR (NM_017952, exon 24 of 24)	5297	NR_004378	692225	Hs.723087	NR_004378	snoRNA
2	61178766	61178947	ENSG00000173209	ENSG00000173209	AHSA2P	activator of HSP90 ATPase homolog 2, pseudogene	0.00018	+	61178766	61178947	0	1	181,	0	-7.49	-8.64	-0.769	non-coding (NR_152212, exon 1 of 7)	non-coding (NR_152212, exon 1 of 7)	1439	NR_152215	130872	Hs.655602	NM_152392	pseudo
2	74457783	74459716	ENSG00000274049	ENSG00000239779	WBP1	WW domain binding protein 1	0.047	+	74457783	74459716	0	2	77,74,	0,1859	-2.44	-3.05	-0.766	TTS (NM_031288)	TTS (NM_031288)	312	NM_012477	23559	Hs.516114	NM_012477	protein-coding
2	131520288	131521454	ENSG00000152117	ENSG00000163040	CCDC74A	coiled-coil domain containing 74A	3.7e-05	+	131520288	131521454	0	1	1166,	0	-8.94	-10.2	-0.761	non-coding (NR_026922, exon 18 of 18)	non-coding (NR_026922, exon 18 of 18)	-6804	NM_001258305	90557	Hs.351461	NM_138770	protein-coding
2	218648813	218649053	ENSG00000115568	ENSG00000115568	ZNF142	zinc finger protein 142	0.082	-	218648813	218649053	0	1	240,	0	-1.97	-2.5	-0.76	exon (NM_001366291, exon 5 of 9)	exon (NM_001366291, exon 5 of 9)	10690	NM_001367339	7701	Hs.657969	NM_001105537	protein-coding
2	172088268	172089288	ENSG00000144355	ENSG00000144355	DLX1	distal-less homeobox 1	0.0016	+	172088268	172089288	0	1	1020,	0	-5.48	-6.44	-0.758	3' UTR (NM_001038493, exon 2 of 2)	3' UTR (NM_001038493, exon 2 of 2)	3271	NM_001038493	1745	Hs.407015	NM_178120	protein-coding
2	85558868	85559049	ENSG00000115486	ENSG00000115486	GGCX	gamma-glutamyl carboxylase	0.16	-	85558868	85559049	0	1	181,	0	-1.42	-1.84	-0.751	exon (NM_000821, exon 3 of 15)	exon (NM_000821, exon 3 of 15)	2534	NM_000821	2677	Hs.77719	NM_000821	protein-coding
2	8682911	8684066	ENSG00000115738	ENSG00000115738	ID2	inhibitor of DNA binding 2	1.9e-11	+	8682911	8684066	0	2	96,382,	0,773	-22.8	-24.7	-0.749	intron (NM_002166, intron 2 of 2)	intron (NM_002166, intron 2 of 2)	1433	NM_002166	3398	Hs.180919	NM_002166	protein-coding
2	9473010	9473101	ENSG00000119203	ENSG00000134330	IAH1	isoamyl acetate hydrolyzing esterase 1 (putative)	0.052	+	9473010	9473101	0	1	91,	0	-2.35	-2.95	-0.749	TTS (NM_001321834)	TTS (NM_001321834)	-1495	NM_001320859	285148	Hs.667226	NM_001039613	protein-coding
2	44230483	44230754	ENSG00000138032	ENSG00000138079	SLC3A1	solute carrier family 3 member 1	0.006	+	44230483	44230754	0	1	271,	0	-4.27	-5.11	-0.748	exon (NM_002706, exon 6 of 6)	exon (NM_002706, exon 6 of 6)	-44861	NM_000341	6519	Hs.112916	NM_000341	protein-coding
2	112659227	112659677	ENSG00000144136	ENSG00000144136	SLC20A1	solute carrier family 20 member 1	2.1e-07	+	112659227	112659677	0	1	450,	0	-13.9	-15.4	-0.743	exon (NM_005415, exon 8 of 11)	exon (NM_005415, exon 8 of 11)	13513	NM_005415	6574	Hs.187946	NM_005415	protein-coding
2	23707982	23708551	ENSG00000119771	ENSG00000119778	ATAD2B	ATPase family AAA domain containing 2B	0.18	+	23707982	23708551	0	1	569,	0	-1.31	-1.72	-0.74	3' UTR (NM_052920, exon 14 of 14)	3' UTR (NM_052920, exon 14 of 14)	218856	NM_017552	54454	Hs.467862	NM_017552	protein-coding
2	61190666	61191116	ENSG00000115464	ENSG00000173209	AHSA2P	activator of HSP90 ATPase homolog 2, pseudogene	0.0011	-	61190666	61191116	0	1	450,	0	-5.83	-6.84	-0.739	intron (NM_014709, intron 76 of 79)	MamRep434|DNA|TcMar-Tigger	13473	NR_152215	130872	Hs.655602	NM_152392	pseudo
2	61190603	61191143	ENSG00000173209	ENSG00000173209	AHSA2P	activator of HSP90 ATPase homolog 2, pseudogene	0.00034	+	61190603	61191143	0	1	540,	0	-6.9	-7.99	-0.729	intron (NM_014709, intron 76 of 79)	MamRep434|DNA|TcMar-Tigger	13455	NR_152215	130872	Hs.655602	NM_152392	pseudo
2	9405660	9406110	ENSG00000119185	ENSG00000119185	ITGB1BP1	integrin subunit beta 1 binding protein 1	0.067	-	9405660	9406110	0	1	450,	0	-2.14	-2.7	-0.725	TTS (NM_001135191)	TTS (NM_001135191)	16706	NM_001319068	9270	Hs.467662	NM_004763	protein-coding
2	27101010	27101459	ENSG00000138028	ENSG00000138030	KHK	ketohexokinase	0.093	-	27101010	27101459	0	1	449,	0	-1.86	-2.37	-0.724	TTS (NM_006488)	TTS (NM_006488)	14463	NM_000221	3795	Hs.567297	NM_000221	protein-coding
2	53854401	53859929	ENSG00000119737	ENSG00000119737	GPR75	G protein-coupled receptor 75	0.097	-	53854401	53859929	0	2	464,102,	0,5426	-1.83	-2.33	-0.721	intron (NM_006794, intron 1 of 1)	AluYb8|SINE|Alu	2802	NM_006794	10936	Hs.40763	NM_006794	protein-coding
2	74530059	74530357	ENSG00000115317	ENSG00000115307	AUP1	AUP1 lipid droplet regulating VLDL assembly factor	0.097	+	74530059	74530357	0	1	298,	0	-1.82	-2.33	-0.718	promoter-TSS (NM_181575)	promoter-TSS (NM_181575)	-502	NR_126510	550	Hs.411480	NM_181575	protein-coding
2	95214411	95259222	ENSG00000233757	ENSG00000155066	PROM2	prominin 2	0.027	+	95214411	95259222	0	3	1192,38,147,	0,17649,44664	-2.92	-3.6	-0.711	Intergenic	MER31-int|LTR|ERV1	-37632	NM_001321070	150696	Hs.437376	NM_144707	protein-coding
2	65071809	65072977	ENSG00000011523	ENSG00000011523	CEP68	centrosomal protein 68	0.00033	+	65071809	65072977	0	1	1168,	0	-6.92	-8.02	-0.708	exon (NM_001319101, exon 3 of 7)	exon (NM_001319101, exon 3 of 7)	15977	NM_001319101	23177	Hs.709257	NM_015147	protein-coding
2	201262279	201269520	ENSG00000064012	ENSG00000064012	CASP8	caspase 8	0.0014	+	201262279	201269520	0	3	18,331,11,	0,4181,7230	-5.6	-6.58	-0.706	intron (NM_033356, intron 1 of 7)	intron (NM_033356, intron 1 of 7)	5364	NM_033356	841	Hs.599762	NM_001228	protein-coding
2	241229149	241229449	ENSG00000115677	ENSG00000146205	ANO7	anoctamin 7	2.1e-08	-	241229149	241229449	0	1	300,	0	-16	-17.7	-0.697	3' UTR (NM_001320965, exon 28 of 28)	3' UTR (NM_001320965, exon 28 of 28)	40622	NM_001370694	50636	Hs.163909	NM_001001666	protein-coding
2	38074322	38075037	ENSG00000232973	ENSG00000138061	CYP1B1	cytochrome P450 family 1 subfamily B member 1	0.0083	+	38074322	38075037	0	2	105,165,	0,550	-3.98	-4.79	-0.696	exon (NM_000104, exon 2 of 3)	exon (NM_000104, exon 2 of 3)	1501	NM_000104	1545	Hs.154654	NM_000104	protein-coding
2	127764206	127764477	ENSG00000136709	ENSG00000136709	WDR33	WD repeat domain 33	0.1	-	127764206	127764477	0	1	271,	0	-1.77	-2.26	-0.692	3' UTR (NM_001006622, exon 6 of 6)	3' UTR (NM_001006622, exon 6 of 6)	46829	NM_018383	55339	Hs.554831	NM_018383	protein-coding
2	201171406	201171587	ENSG00000003402	ENSG00000003400	CASP10	caspase 10	0.18	+	201171406	201171587	0	1	181,	0	-1.32	-1.72	-0.686	non-coding (NR_147249, exon 10 of 10)	non-coding (NR_147249, exon 10 of 10)	-11401	NM_032977	843	Hs.5353	NM_001230	protein-coding
2	201116133	201117130	ENSG00000003402	ENSG00000003402	CFLAR	CASP8 and FADD like apoptosis regulator	0.096	+	201116133	201117130	0	3	348,131,92,	0,703,905	-1.83	-2.34	-0.679	intron (NR_147248, intron 1 of 10)	CpG	468	NM_001202516	8837	Hs.390736	NM_003879	protein-coding
2	18555544	18563850	ENSG00000250741	ENSG00000240857	RDH14	retinol dehydrogenase 14	0.042	-	18555544	18563850	0	2	264,6,	0,8300	-2.54	-3.16	-0.672	intron (NM_001199103, intron 8 of 8)	intron (NM_001199103, intron 8 of 8)	956	NM_020905	57665	Hs.120319	NM_020905	protein-coding
2	53774198	53774668	ENSG00000143942	ENSG00000143942	CHAC2	ChaC cation transport regulator homolog 2	0.012	+	53774198	53774668	0	1	470,	0	-3.63	-4.4	-0.664	exon (NM_001346127, exon 3 of 3)	exon (NM_001346127, exon 3 of 3)	6629	NM_001008708	494143	Hs.585944	NM_001008708	protein-coding
2	189783015	189783526	ENSG00000128699				1e-06	-	189783015	189783526	0	1	511,	0	-12.3	-13.8	-0.663	promoter-TSS (NM_001289408)	promoter-TSS (NM_001289408)	722	NM_001371388
2	62706723	62747415	ENSG00000115504	ENSG00000115504	EHBP1	EH domain binding protein 1	0.072	+	62706723	62747415	0	3	31,399,21,	0,173,40671	-2.08	-2.63	-0.651	intron (NM_001142615, intron 2 of 22)	AluSg|SINE|Alu	20172	NM_001354217	23301	Hs.271667	NM_015252	protein-coding
2	170966528	170966799	ENSG00000115806	ENSG00000115806	GORASP2	golgi reassembly stacking protein 2	0.00019	+	170966528	170966799	0	1	271,	0	-7.43	-8.57	-0.645	3' UTR (NM_015530, exon 10 of 10)	3' UTR (NM_015530, exon 10 of 10)	37411	NM_015530	26003	Hs.431317	NM_015530	protein-coding
2	178413938	178415942	ENSG00000223960	ENSG00000223960	CHROMR	cholesterol induced regulator of metabolism RNA	0.11	+	178413938	178415942	0	2	175,125,	0,1879	-1.74	-2.23	-0.64	intron (NR_110206, intron 1 of 2)	intron (NR_110206, intron 1 of 2)	1281	NR_110205	101927027	Hs.715694	NR_110204	ncRNA
2	61177777	61178047	ENSG00000173209	ENSG00000173209	AHSA2P	activator of HSP90 ATPase homolog 2, pseudogene	0.036	+	61177777	61178047	0	1	270,	0	-2.68	-3.32	-0.637	non-coding (NR_152211, exon 1 of 7)	non-coding (NR_152211, exon 1 of 7)	494	NR_152215	130872	Hs.655602	NM_152392	pseudo
2	112659017	112659138	ENSG00000144136	ENSG00000144136	SLC20A1	solute carrier family 20 member 1	0.015	+	112659017	112659138	0	1	121,	0	-3.48	-4.23	-0.635	exon (NM_005415, exon 7 of 11)	exon (NM_005415, exon 7 of 11)	13139	NM_005415	6574	Hs.187946	NM_005415	protein-coding
2	232857610	232858209	ENSG00000204120	ENSG00000182600	SNORC	secondary ossification center associated regulator of chondrocyte maturation	1.2e-05	+	232857610	232858209	0	1	599,	0	-9.97	-11.3	-0.632	non-coding (NR_103492, exon 27 of 27)	non-coding (NR_103492, exon 27 of 27)	-11104	NM_001346122	389084	Hs.657509	NM_206895	protein-coding
2	55617908	55618315	ENSG00000272606	ENSG00000275052	PPP4R3B	protein phosphatase 4 regulatory subunit 3B	0.16	+	55617908	55618315	0	1	407,	0	-1.43	-1.86	-0.629	promoter-TSS (NM_001282850)	promoter-TSS (NM_001282850)	-490	NM_020463	57223	Hs.516182	NM_020463	protein-coding
2	74122047	74123218	ENSG00000257800	ENSG00000163170	BOLA3	bolA family member 3	0.12	+	74122047	74123218	0	2	403,223,	0,948	-1.66	-2.13	-0.626	Intergenic	AluSc8|SINE|Alu	25279	NM_212552	388962	Hs.61472	NM_212552	protein-coding
2	231172616	231172827	ENSG00000173692	ENSG00000135931	ARMC9	armadillo repeat containing 9	0.021	+	231172616	231172827	0	1	211,	0	-3.15	-3.86	-0.626	non-coding (NR_034059, exon 24 of 24)	non-coding (NR_034059, exon 24 of 24)	-25909	NM_001271466	80210	Hs.162411	NM_025139	protein-coding
2	3531989	3532255	ENSG00000242282	ENSG00000182551	ADI1	acireductone dioxygenase 1	0.069	-	3531989	3532255	0	1	266,	0	-2.11	-2.67	-0.624	non-coding (NR_148532, exon 11 of 11)	non-coding (NR_148532, exon 11 of 11)	-12591	NM_018269	55256	Hs.502773	NM_018269	protein-coding
2	127847730	127848149	ENSG00000144231	ENSG00000144231	POLR2D	RNA polymerase II subunit D	5.8e-05	-	127847730	127848149	0	1	419,	0	-8.53	-9.76	-0.623	3' UTR (NM_004805, exon 4 of 4)	3' UTR (NM_004805, exon 4 of 4)	10215	NM_004805	5433	Hs.715348	NM_004805	protein-coding
2	230543639	230544090	ENSG00000067066	ENSG00000067066	SP100	SP100 nuclear antigen	0.0067	+	230543639	230544090	0	1	451,	0	-4.17	-5	-0.622	3' UTR (NM_001080391, exon 29 of 29)	3' UTR (NM_001080391, exon 29 of 29)	127109	NM_001206704	6672	Hs.369056	NM_003113	protein-coding
2	53852972	53854134	ENSG00000119737	ENSG00000265452	MIR3682	microRNA 3682	0.037	-	53852972	53854134	0	1	1162,	0	-2.65	-3.29	-0.62	exon (NM_006794, exon 2 of 2)	exon (NM_006794, exon 2 of 2)	-4348	NR_037453	100500850		NR_037453	ncRNA
2	99161987	99163157	ENSG00000144182	ENSG00000144182	LIPT1	lipoyltransferase 1	0.0002	+	99161987	99163157	0	1	1170,	0	-7.36	-8.5	-0.618	non-coding (NR_037936, exon 3 of 3)	non-coding (NR_037936, exon 3 of 3)	7498	NR_037935	51601	Hs.719172	NM_015929	protein-coding
2	127846267	127847343	ENSG00000144231	ENSG00000144231	POLR2D	RNA polymerase II subunit D	3.1e-07	-	127846267	127847343	0	1	1076,	0	-13.4	-15	-0.618	3' UTR (NM_004805, exon 4 of 4)	3' UTR (NM_004805, exon 4 of 4)	11350	NM_004805	5433	Hs.715348	NM_004805	protein-coding
2	218738359	218740061	ENSG00000135912	ENSG00000135912	TTLL4	tubulin tyrosine ligase like 4	0.0016	+	218738359	218740061	0	2	804,4,	0,1698	-5.48	-6.44	-0.618	intron (NM_014640, intron 3 of 19)	intron (NM_014640, intron 3 of 19)	28375	NM_014640	9654	Hs.471405	NM_014640	protein-coding
2	135202851	135207832	ENSG00000121988	ENSG00000208308	SNORA40B	small nucleolar RNA, H/ACA box 40B	0.11	-	135202851	135207832	0	2	112,399,	0,4582	-1.73	-2.22	-0.617	intron (NM_001286569, intron 20 of 21)	AluJb|SINE|Alu	68714	NR_145723	109616967		NR_145723	snoRNA
2	62224164	62224254	ENSG00000170340	ENSG00000170340	B3GNT2	UDP-GlcNAc:betaGal beta-1,3-N-acetylglucosaminyltransferase 2	0.13	+	62224164	62224254	0	1	90,	0	-1.6	-2.06	-0.616	3' UTR (NM_001319075, exon 2 of 2)	3' UTR (NM_001319075, exon 2 of 2)	8688	NM_001319075	10678	Hs.173203	NM_006577	protein-coding
2	44359600	44360020	ENSG00000138078	ENSG00000138078	PREPL	prolyl endopeptidase like	0.03	-	44359600	44360020	0	1	420,	0	-2.83	-3.5	-0.615	promoter-TSS (NM_001042385)	promoter-TSS (NM_001042385)	-61	NM_001042386	9581	Hs.444349	NM_006036	protein-coding
2	73424483	73424873	ENSG00000116127	ENSG00000230002	ALMS1-IT1	ALMS1 intronic transcript 1	0.14	+	73424483	73424873	0	1	390,	0	-1.54	-1.99	-0.612	exon (NM_015120, exon 5 of 23)	exon (NM_015120, exon 5 of 23)	-32425	NR_046762	100874291	Hs.668279	NR_046762	ncRNA
2	74457780	74457960	ENSG00000115274	ENSG00000239779	WBP1	WW domain binding protein 1	0.12	+	74457780	74457960	0	1	180,	0	-1.64	-2.1	-0.603	promoter-TSS (NM_012477)	promoter-TSS (NM_012477)	-568	NM_012477	23559	Hs.516114	NM_012477	protein-coding
2	74103177	74103477	ENSG00000187605	ENSG00000163170	BOLA3	bolA family member 3	0.057	+	74103177	74103477	0	1	300,	0	-2.28	-2.86	-0.601	3' UTR (NM_001366022, exon 11 of 11)	3' UTR (NM_001366022, exon 11 of 11)	44585	NM_212552	388962	Hs.61472	NM_212552	protein-coding
2	47074010	47074490	ENSG00000068724	ENSG00000239605	STPG4	sperm-tail PG-rich repeat containing 4	0.00062	+	47074010	47074490	0	1	480,	0	-6.33	-7.38	-0.6	3' UTR (NM_001288955, exon 19 of 19)	3' UTR (NM_001288955, exon 19 of 19)	81058	NM_001163561	285051	Hs.531575	NM_173649	protein-coding
2	85549719	85550050	ENSG00000115486	ENSG00000168906	MAT2A	methionine adenosyltransferase 2A	0.099	-	85549719	85550050	0	1	331,	0	-1.81	-2.31	-0.599	3' UTR (NM_000821, exon 15 of 15)	3' UTR (NM_000821, exon 15 of 15)	10717	NM_005911	4144	Hs.516157	NM_005911	protein-coding
2	53670382	53670653	ENSG00000270898	ENSG00000143942	CHAC2	ChaC cation transport regulator homolog 2	0.0036	-	53670382	53670653	0	1	271,	0	-4.73	-5.62	-0.596	exon (NM_001164165, exon 10 of 10)	exon (NM_001164165, exon 10 of 10)	-97265	NM_001346127	494143	Hs.585944	NM_001008708	protein-coding
2	191688363	191688634	ENSG00000173559		LOC105747689	uncharacterized LOC105747689	0.16	+	191688363	191688634	0	1	271,	0	-1.41	-1.84	-0.589	non-coding (NR_045622, exon 7 of 7)	non-coding (NR_045622, exon 7 of 7)	-1682	NR_131917	105747689	Hs.104972	NR_131917	ncRNA
2	240524001	240526024	ENSG00000144504	ENSG00000144504	ANKMY1	ankyrin repeat and MYND domain containing 1	0.0012	-	240524001	240526024	0	2	380,340,	0,1683	-5.75	-6.74	-0.582	intron (NM_017844, intron 5 of 13)	LOR1b|LTR|ERV1	32975	NM_017844	51281	Hs.656615	NM_016552	protein-coding
2	3531983	3532264	ENSG00000255767	ENSG00000182551	ADI1	acireductone dioxygenase 1	0.08	-	3531983	3532264	0	1	281,	0	-1.99	-2.52	-0.574	non-coding (NR_148532, exon 11 of 11)	non-coding (NR_148532, exon 11 of 11)	-12593	NM_018269	55256	Hs.502773	NM_018269	protein-coding
2	26034106	26034286	ENSG00000084733	ENSG00000084733	RAB10	RAB10, member RAS oncogene family	0.15	+	26034106	26034286	0	1	180,	0	-1.46	-1.9	-0.574	5' UTR (NM_016131, exon 1 of 6)	5' UTR (NM_016131, exon 1 of 6)	112	NM_016131	10890	Hs.467960	NM_016131	protein-coding
2	113598654	113599043	ENSG00000146556		DDX11L2	DEAD/H-box helicase 11 like 2	0.047	+	113598654	113599043	0	1	389,	0	-2.45	-3.06	-0.574	TTS (NR_024005)	TTS (NR_024005)	2727	NR_024005	84771	Hs.712940	NR_024004	pseudo
2	96860343	96861150	ENSG00000168758	ENSG00000213337	ANKRD39	ankyrin repeat domain 39	0.0089	-	96860343	96861150	0	1	807,	0	-3.91	-4.72	-0.573	exon (NM_017789, exon 15 of 15)	exon (NM_017789, exon 15 of 15)	-2731	NM_016466	51239	Hs.709507	NM_016466	protein-coding
2	38733940	38734151	ENSG00000143891	ENSG00000115875	SRSF7	serine and arginine rich splicing factor 7	0.023	+	38733940	38734151	0	1	211,	0	-3.09	-3.78	-0.566	3' UTR (NM_138801, exon 7 of 7)	3' UTR (NM_138801, exon 7 of 7)	17315	NM_001031684	6432	Hs.309090	NM_006276	protein-coding
2	241672212	241672841	ENSG00000168397	ENSG00000168393	DTYMK	deoxythymidylate kinase	0.051	+	241672212	241672841	0	1	629,	0	-2.37	-2.97	-0.554	3' UTR (NM_178326, exon 13 of 13)	3' UTR (NM_178326, exon 13 of 13)	14288	NR_135492	1841	Hs.471873	NM_012145	protein-coding
2	197473932	197474202	ENSG00000115520		SNORA105A	small nucleolar RNA, H/ACA box 105A	0.038	+	197473932	197474202	0	1	270,	0	-2.63	-3.26	-0.55	3' UTR (NM_025147, exon 5 of 5)	3' UTR (NM_025147, exon 5 of 5)	12836	NR_132787	106635539		NR_132787	snoRNA
2	53670391	53670662	ENSG00000115239	ENSG00000143942	CHAC2	ChaC cation transport regulator homolog 2	0.0059	-	53670391	53670662	0	1	271,	0	-4.29	-5.13	-0.549	exon (NM_001164165, exon 10 of 10)	exon (NM_001164165, exon 10 of 10)	-97256	NM_001346127	494143	Hs.585944	NM_001008708	protein-coding
2	27207506	27208440	ENSG00000138074	ENSG00000138085	ATRAID	all-trans retinoic acid induced differentiation factor	0.12	-	27207506	27208440	0	2	284,47,	0,887	-1.67	-2.15	-0.547	intron (NR_028323, intron 2 of 16)	intron (NR_028323, intron 2 of 16)	-4058	NM_080592	51374	Hs.9527	NM_016085	protein-coding
2	105893436	105893826	ENSG00000071051	ENSG00000071051	NCK2	NCK adaptor protein 2	2e-05	+	105893436	105893826	0	1	390,	0	-9.52	-10.8	-0.546	3' UTR (NM_001004722, exon 4 of 4)	3' UTR (NM_001004722, exon 4 of 4)	41784	NM_001004720	8440	Hs.529244	NM_003581	protein-coding
2	86464163	86470238	ENSG00000115548	ENSG00000115548	KDM3A	lysine demethylase 3A	1e-08	+	86464163	86470238	0	4	53,512,30,35,	0,2208,3175,6040	-16.7	-18.4	-0.545	intron (NM_018433, intron 10 of 25)	intron (NM_018433, intron 10 of 25)	25740	NM_001146688	55818	Hs.557425	NM_018433	protein-coding
2	113174028	113183458	ENSG00000125637	ENSG00000125637	PSD4	pleckstrin and Sec7 domain containing 4	8.3e-06	+	113174028	113183458	0	2	26,1113,	0,8317	-10.3	-11.7	-0.541	intron (NM_012455, intron 1 of 16)	intron (NM_012455, intron 1 of 16)	4772	NM_012455	23550	Hs.516306	NM_012455	protein-coding
2	27647928	27650609	ENSG00000198522	ENSG00000163798	SLC4A1AP	solute carrier family 4 member 1 adaptor protein	9.2e-07	+	27647928	27650609	0	2	15,495,	0,2186	-12.4	-13.9	-0.539	intron (NM_007266, intron 13 of 13)	(CAAA)n|Simple_repeat|Simple_repeat	-14202	NM_018158	22950	Hs.306000	NM_018158	protein-coding
2	66433541	66435496	ENSG00000143995	ENSG00000143995	MEIS1	Meis homeobox 1	0.00023	+	66433541	66435496	0	2	26,364,	0,1591	-7.25	-8.38	-0.539	promoter-TSS (NM_002398)	promoter-TSS (NM_002398)	-606	NM_002398	4211	Hs.526754	NM_002398	protein-coding
2	68710664	68735331	ENSG00000163219	ENSG00000163219	ARHGAP25	Rho GTPase activating protein 25	0.086	+	68710664	68735331	0	3	34,426,20,	0,24170,24647	-1.93	-2.45	-0.538	Intergenic	Intergenic	-11813	NM_001364819	9938	Hs.531807	NM_014882	protein-coding
2	74003116	74046796	ENSG00000187605	ENSG00000187605	TET3	tet methylcytosine dioxygenase 3	0.081	+	74003116	74046796	0	2	50,519,	0,43161	-1.98	-2.51	-0.538	intron (NM_001287491, intron 3 of 11)	AluYj4|SINE|Alu	22264	NM_001366022	200424	Hs.208546	NM_001287491	protein-coding
2	54558439	54558770	ENSG00000115306	ENSG00000115306	SPTBN1	spectrin beta, non-erythrocytic 1	0.17	+	54558439	54558770	0	1	331,	0	-1.37	-1.79	-0.537	5' UTR (NM_178313, exon 1 of 31)	5' UTR (NM_178313, exon 1 of 31)	211	NM_178313	6711	Hs.503178	NM_003128	protein-coding
2	74929954	74931028	ENSG00000204792	ENSG00000204792	LINC01291	long intergenic non-protein coding RNA 1291	0.015	+	74929954	74931028	0	1	1074,	0	-3.43	-4.17	-0.537	intron (NR_125792, intron 1 of 4)	FordPrefect|DNA|hAT-Tip100	21360	NR_125792	102724515	Hs.708649	NR_125792	ncRNA
2	74532891	74533549	ENSG00000115318	ENSG00000115307	AUP1	AUP1 lipid droplet regulating VLDL assembly factor	0.0022	-	74532891	74533549	0	1	658,	0	-5.2	-6.13	-0.535	non-coding (NR_135772, exon 9 of 9)	non-coding (NR_135772, exon 9 of 9)	-3514	NR_126510	550	Hs.411480	NM_181575	protein-coding
2	223957581	223967122	ENSG00000135900	ENSG00000135900	MRPL44	mitochondrial ribosomal protein L44	2.1e-15	+	223957581	223967122	0	4	70,469,179,260,	0,1952,6174,9281	-31.7	-33.8	-0.535	intron (NM_022915, intron 2 of 3)	intron (NM_022915, intron 2 of 3)	4889	NM_022915	65080	Hs.203559	NM_022915	protein-coding
2	105881637	105893228	ENSG00000071051	ENSG00000071051	NCK2	NCK adaptor protein 2	7.5e-06	+	105881637	105893228	0	2	412,247,	0,11344	-10.5	-11.8	-0.534	intron (NM_001004720, intron 3 of 3)	intron (NM_001004720, intron 3 of 3)	35586	NM_001004720	8440	Hs.529244	NM_003581	protein-coding
2	95181156	95181515	ENSG00000275111	ENSG00000275111	ZNF2	zinc finger protein 2	0.18	+	95181156	95181515	0	1	359,	0	-1.34	-1.74	-0.533	exon (NM_001291605, exon 5 of 5)	exon (NM_001291605, exon 5 of 5)	15527	NM_001282398	7549	Hs.590916	NM_021088	protein-coding
2	130151601	130152681	ENSG00000136699	ENSG00000152076	CCDC74B	coiled-coil domain containing 74B	3.4e-05	-	130151601	130152681	0	1	1080,	0	-9	-10.3	-0.532	non-coding (NR_033231, exon 19 of 19)	non-coding (NR_033231, exon 19 of 19)	-7007	NM_001258307	91409	Hs.29383	NM_207310	protein-coding
2	127846735	127847084	ENSG00000244563	ENSG00000144231	POLR2D	RNA polymerase II subunit D	0.0071	-	127846735	127847084	0	1	349,	0	-4.12	-4.95	-0.53	3' UTR (NM_004805, exon 4 of 4)	3' UTR (NM_004805, exon 4 of 4)	11245	NM_004805	5433	Hs.715348	NM_004805	protein-coding
2	45599453	45601998	ENSG00000068784	ENSG00000068784	SRBD1	S1 RNA binding domain 1	0.016	-	45599453	45601998	0	2	382,96,	0,2449	-3.42	-4.16	-0.528	intron (NM_018079, intron 3 of 20)	intron (NM_018079, intron 3 of 20)	10541	NM_018079	55133	Hs.14229	NM_018079	protein-coding
2	238446460	238446881	ENSG00000065802	ENSG00000065802	ASB1	ankyrin repeat and SOCS box containing 1	0.12	+	238446460	238446881	0	1	421,	0	-1.65	-2.13	-0.526	3' UTR (NM_001330196, exon 4 of 4)	3' UTR (NM_001330196, exon 4 of 4)	19744	NM_001330196	51665	Hs.516788	NM_016114	protein-coding
2	95815946	95816215	ENSG00000232931		LINC00342	long intergenic non-protein coding RNA 342	0.17	-	95815946	95816215	0	1	269,	0	-1.37	-1.79	-0.524	intron (NR_103734, intron 1 of 2)	L1PREC2|LINE|L1	10900	NR_103734	150759	Hs.503463	NR_103734	ncRNA
2	216414701	216415511	ENSG00000138375	ENSG00000138375	SMARCAL1	SWI/SNF related, matrix associated, actin dependent regulator of chromatin, subfamily a like 1	0.0073	+	216414701	216415511	0	1	810,	0	-4.1	-4.92	-0.523	exon (NM_014140, exon 3 of 18)	exon (NM_014140, exon 3 of 18)	2341	NM_001127207	50485	Hs.516674	NM_014140	protein-coding
2	74461056	74462102	ENSG00000115275	ENSG00000239779	WBP1	WW domain binding protein 1	4.7e-05	-	74461056	74462102	0	1	1046,	0	-8.72	-9.97	-0.521	TTS (NR_037849)	TTS (NR_037849)	3141	NM_012477	23559	Hs.516114	NM_012477	protein-coding
2	96208415	96208862	ENSG00000204685	ENSG00000084090	STARD7	StAR related lipid transfer domain containing 7	0.023	+	96208415	96208862	0	1	447,	0	-3.06	-3.76	-0.518	non-coding (NR_046322, exon 1 of 4)	non-coding (NR_046322, exon 1 of 4)	196	NM_020151	56910	Hs.469331	NM_020151	protein-coding
2	219248601	219248991	ENSG00000115661	ENSG00000115661	STK16	serine/threonine kinase 16	0.072	+	219248601	219248991	0	1	390,	0	-2.08	-2.63	-0.515	TTS (NM_001278552)	TTS (NM_001278552)	2900	NM_001330214	8576	Hs.153003	NM_003691	protein-coding
2	39736567	39744445	ENSG00000138050	ENSG00000138050	THUMPD2	THUMP domain containing 2	0.018	-	39736567	39744445	0	2	492,76,	0,7802	-3.31	-4.03	-0.506	intron (NR_135664, intron 11 of 11)	intron (NR_135664, intron 11 of 11)	38752	NM_025264	80745	Hs.468254	NM_025264	protein-coding
2	38070415	38073671	ENSG00000138061	ENSG00000138061	CYP1B1	cytochrome P450 family 1 subfamily B member 1	4.3e-20	-	38070415	38073671	0	2	895,156,	0,3100	-42.2	-44.6	-0.502	intron (NM_000104, intron 2 of 2)	L1ME4c|LINE|L1	4138	NM_000104	1545	Hs.154654	NM_000104	protein-coding
2	74462489	74462968	ENSG00000115275	ENSG00000115275	MOGS	mannosyl-oligosaccharide glucosidase	0.0084	-	74462489	74462968	0	1	479,	0	-3.97	-4.78	-0.498	exon (NM_006302, exon 4 of 4)	exon (NM_006302, exon 4 of 4)	2653	NM_001146158	7841	Hs.516119	NM_006302	protein-coding
2	55598440	55604009	ENSG00000275052	ENSG00000275052	PPP4R3B	protein phosphatase 4 regulatory subunit 3B	4.6e-10	-	55598440	55604009	0	2	599,32,	0,5537	-19.7	-21.5	-0.492	intron (NM_020463, intron 3 of 14)	MER21-int|LTR|ERVL	16397	NM_001282850	57223	Hs.516182	NM_020463	protein-coding
2	97756692	97757293	ENSG00000075568	ENSG00000115085	ZAP70	zeta chain of T cell receptor associated protein kinase 70	3.4e-06	-	97756692	97757293	0	1	601,	0	-11.2	-12.6	-0.483	3' UTR (NM_015348, exon 41 of 41)	3' UTR (NM_015348, exon 41 of 41)	22587	NM_207519	7535	Hs.234569	NM_001079	protein-coding
2	121530721	121649467	ENSG00000074054	ENSG00000264229	RNU4ATAC	RNA, U4atac small nuclear (U12-dependent splicing)	0.018	-	121530721	121649467	0	3	24,480,96,	0,74979,118650	-3.31	-4.03	-0.48	intron (NM_015282, intron 2 of 38)	intron (NM_015282, intron 2 of 38)	59214	NR_023343	100151683	Hs.689638	NR_023343	snRNA
2	201136313	201136914	ENSG00000003402	ENSG00000003402	CFLAR	CASP8 and FADD like apoptosis regulator	0.085	+	201136313	201136914	0	1	601,	0	-1.94	-2.46	-0.48	3' UTR (NM_001308043, exon 5 of 5)	3' UTR (NM_001308043, exon 5 of 5)	-3661	NM_001202515	8837	Hs.390736	NM_003879	protein-coding
2	58159331	58160145	ENSG00000115392	ENSG00000115392	FANCL	FA complementation group L	9.2e-06	-	58159331	58160145	0	2	469,38,	0,776	-10.3	-11.6	-0.479	non-coding (NR_156742, exon 10 of 10)	non-coding (NR_156742, exon 10 of 10)	81642	NR_156742	55120	Hs.631890	NM_018062	protein-coding
2	74532931	74533259	ENSG00000115317	ENSG00000115307	AUP1	AUP1 lipid droplet regulating VLDL assembly factor	0.0088	+	74532931	74533259	0	1	328,	0	-3.93	-4.73	-0.479	non-coding (NR_135772, exon 9 of 9)	non-coding (NR_135772, exon 9 of 9)	-3389	NR_126510	550	Hs.411480	NM_181575	protein-coding
2	675535	676013	ENSG00000151353	ENSG00000151353	TMEM18	transmembrane protein 18	0.032	-	675535	676013	0	1	478,	0	-2.78	-3.43	-0.477	exon (NM_001352680, exon 2 of 6)	exon (NM_001352680, exon 2 of 6)	930	NM_001352681	129787	Hs.6729	NM_152834	protein-coding
2	70275601	70277568	ENSG00000116005	ENSG00000143977	SNRPG	small nuclear ribonucleoprotein polypeptide G	0.0043	+	70275601	70277568	0	2	65,835,	0,1132	-4.59	-5.46	-0.475	intron (NM_016297, intron 5 of 5)	intron (NM_016297, intron 5 of 5)	16639	NM_001317167	6637	Hs.465167	NM_003096	protein-coding
2	240577632	240578142	ENSG00000142327	ENSG00000260942	CAPN10-DT	CAPN10 divergent transcript	0.0016	+	240577632	240578142	0	1	510,	0	-5.49	-6.46	-0.475	exon (NM_018226, exon 11 of 11)	exon (NM_018226, exon 11 of 11)	8429	NR_103792	101752400	Hs.585987	NR_103792	ncRNA
2	95148375	95150198	ENSG00000144026	ENSG00000144026	ZNF514	zinc finger protein 514	0.051	-	95148375	95150198	0	1	1823,	0	-2.39	-2.98	-0.47	exon (NM_032788, exon 5 of 5)	exon (NM_032788, exon 5 of 5)	10298	NM_001318005	84874	Hs.355664	NM_032788	protein-coding
2	178432278	178433587	ENSG00000223960	ENSG00000180228	PRKRA	protein activator of interferon induced protein kinase EIF2AK2	0.082	+	178432278	178433587	0	2	4,206,	0,1103	-1.97	-2.5	-0.464	intron (NM_001139517, intron 6 of 6)	intron (NM_001139517, intron 6 of 6)	17695	NM_001139518	8575	Hs.570274	NM_003690	protein-coding
2	28865096	28870212	ENSG00000171103	ENSG00000171103	TRMT61B	tRNA methyltransferase 61B	0.13	-	28865096	28870212	0	2	23,634,	0,4482	-1.59	-2.05	-0.463	intron (NM_017910, intron 1 of 6)	intron (NM_017910, intron 1 of 6)	2655	NM_017910	55006	Hs.468026	NM_017910	protein-coding
2	96239713	96240546	ENSG00000204685		SNORA112	small nucleolar RNA, H/ACA box 112	0.14	+	96239713	96240546	0	1	833,	0	-1.52	-1.96	-0.456	non-coding (NR_046322, exon 3 of 4)	non-coding (NR_046322, exon 3 of 4)	25491	NR_145789	109623481		NR_145789	snoRNA
2	58154775	58159830	ENSG00000028116	ENSG00000115392	FANCL	FA complementation group L	5e-06	+	58154775	58159830	0	2	27,482,	0,4573	-10.8	-12.2	-0.454	intron (NM_001130483, intron 13 of 13)	MER5B|DNA|hAT-Charlie	84077	NR_156742	55120	Hs.631890	NM_018062	protein-coding
2	71078427	71078697	ENSG00000124357	ENSG00000124357	NAGK	N-acetylglucosamine kinase	0.047	+	71078427	71078697	0	1	270,	0	-2.45	-3.06	-0.454	3' UTR (NM_017567, exon 10 of 10)	3' UTR (NM_017567, exon 10 of 10)	9914	NM_001330425	55577	Hs.7036	NM_017567	protein-coding
2	86540992	86561681	ENSG00000115561	ENSG00000115561	CHMP3	charged multivesicular body protein 3	0.085	-	86540992	86561681	0	4	372,62,60,47,	0,1259,1795,20642	-1.93	-2.46	-0.454	intron (NM_001198954, intron 3 of 7)	AluSx1|SINE|Alu	12106	NM_001193517	51652	Hs.591582	NM_016079	protein-coding
2	135168566	135169077	ENSG00000115839	ENSG00000208308	SNORA40B	small nucleolar RNA, H/ACA box 40B	0.009	+	135168566	135169077	0	1	511,	0	-3.91	-4.71	-0.452	3' UTR (NM_012233, exon 24 of 24)	3' UTR (NM_012233, exon 24 of 24)	32194	NR_145723	109616967		NR_145723	snoRNA
2	136114644	136116068	ENSG00000121966	ENSG00000121966	CXCR4	C-X-C motif chemokine receptor 4	3.9e-24	-	136114644	136116068	0	1	1424,	0	-51.3	-53.9	-0.448	exon (NM_001348059, exon 3 of 3)	exon (NM_001348059, exon 3 of 3)	879	NM_001008540	7852	Hs.593413	NM_003467	protein-coding
2	42331589	42331859	ENSG00000143924	ENSG00000115944	COX7A2L	cytochrome c oxidase subunit 7A2 like	0.17	+	42331589	42331859	0	1	270,	0	-1.34	-1.75	-0.444	3' UTR (NM_019063, exon 23 of 23)	3' UTR (NM_019063, exon 23 of 23)	28314	NR_134948	9167	Hs.339639	NM_004718	protein-coding
2	9919766	9934237	ENSG00000115750	ENSG00000134317	GRHL1	grainyhead like transcription factor 1	0.011	+	9919766	9934237	0	2	54,455,	0,14016	-3.7	-4.47	-0.442	intron (NM_001318977, intron 13 of 13)	L1PA6|LINE|L1	-24691	NM_198182	29841	Hs.418493	NM_198182	protein-coding
2	98600329	98602457	ENSG00000183513	ENSG00000183513	COA5	cytochrome c oxidase assembly factor 5	0.0037	-	98600329	98602457	0	2	464,76,	0,2052	-4.72	-5.61	-0.439	intron (NM_001008215, intron 2 of 2)	intron (NM_001008215, intron 2 of 2)	7119	NM_001008215	493753	Hs.596537	NM_001008215	protein-coding
2	85577527	85577648	ENSG00000118640	ENSG00000118640	VAMP8	vesicle associated membrane protein 8	0.059	+	85577527	85577648	0	1	121,	0	-2.25	-2.83	-0.437	promoter-TSS (NM_003761)	promoter-TSS (NM_003761)	2	NM_003761	8673	Hs.714302	NM_003761	protein-coding
2	28414736	28414887	ENSG00000075426	ENSG00000229951	FLJ31356	uncharacterized protein FLJ31356	0.01	+	28414736	28414887	0	1	151,	0	-3.81	-4.6	-0.436	3' UTR (NM_005253, exon 4 of 4)	3' UTR (NM_005253, exon 4 of 4)	-20140	NR_103831	403150	Hs.562970	NR_103831	ncRNA
2	64631799	64632039	ENSG00000179833	ENSG00000179833	SERTAD2	SERTA domain containing 2	0.08	-	64631799	64632039	0	1	240,	0	-1.98	-2.52	-0.436	3' UTR (NM_014755, exon 2 of 2)	3' UTR (NM_014755, exon 2 of 2)	21994	NM_014755	9792	Hs.591569	NM_014755	protein-coding
2	190370977	190371605	ENSG00000151689	ENSG00000151689	INPP1	inositol polyphosphate-1-phosphatase	0.11	+	190370977	190371605	0	1	628,	0	-1.74	-2.23	-0.435	exon (NM_001128928, exon 7 of 7)	exon (NM_001128928, exon 7 of 7)	27702	NM_001128928	3628	Hs.32309	NM_002194	protein-coding
2	218701938	218702477	ENSG00000163482	ENSG00000135912	TTLL4	tubulin tyrosine ligase like 4	0.17	+	218701938	218702477	0	1	539,	0	-1.35	-1.76	-0.421	3' UTR (NM_001243313, exon 27 of 27)	3' UTR (NM_001243313, exon 27 of 27)	-8627	NM_014640	9654	Hs.471405	NM_014640	protein-coding
2	96551169	96552638	ENSG00000196843	ENSG00000196843	ARID5A	AT-rich interaction domain 5A	1.5e-05	+	96551169	96552638	0	1	1469,	0	-9.81	-11.1	-0.419	exon (NM_001319085, exon 7 of 7)	exon (NM_001319085, exon 7 of 7)	14025	NM_001319092	10865	Hs.920	NM_006673	protein-coding
2	219220102	219220313	ENSG00000284820	ENSG00000115657	ABCB6	ATP binding cassette subfamily B member 6 (Langereis blood group)	0.088	-	219220102	219220313	0	1	211,	0	-1.91	-2.43	-0.416	non-coding (NR_104255, exon 16 of 16)	non-coding (NR_104255, exon 16 of 16)	-1250	NM_005689	10058	Hs.107911	NM_005689	protein-coding
2	26778133	26778670	ENSG00000213699	ENSG00000115163	CENPA	centromere protein A	0.097	+	26778133	26778670	0	1	537,	0	-1.83	-2.33	-0.415	exon (NM_017877, exon 6 of 6)	exon (NM_017877, exon 6 of 6)	-7613	NM_001042426	1058	Hs.1594	NM_001809	protein-coding
2	68819713	68826833	ENSG00000163219	ENSG00000163217	BMP10	bone morphogenetic protein 10	0.0003	+	68819713	68826833	0	3	29,533,847,	0,2626,6273	-7	-8.11	-0.411	intron (NM_001007231, intron 10 of 10)	L2a|LINE|L2	48124	NM_014482	27302	Hs.158317	NM_014482	protein-coding
2	218663893	218664400	ENSG00000163481				0.12	-	218663893	218664400	0	1	507,	0	-1.63	-2.1	-0.408	TTS (NM_001318836)	TTS (NM_001318836)	4464	NM_001371456
2	10571900	10572170	ENSG00000115761	ENSG00000115761	NOL10	nucleolar protein 10	0.073	-	10571900	10572170	0	1	270,	0	-2.07	-2.62	-0.407	non-coding (NR_048552, exon 20 of 20)	non-coding (NR_048552, exon 20 of 20)	117940	NM_024894	79954	Hs.222494	NM_024894	protein-coding
2	27772364	27779715	ENSG00000243147	ENSG00000243147	MRPL33	mitochondrial ribosomal protein L33	1.3e-13	+	27772364	27779715	0	4	21,182,107,283,	0,309,2059,7068	-27.6	-29.7	-0.407	intron (NM_004891, intron 3 of 3)	intron (NM_004891, intron 3 of 3)	4321	NM_004891	9553	Hs.515879	NM_004891	protein-coding
2	177230812	177232008	ENSG00000116044	ENSG00000170144	HNRNPA3	heterogeneous nuclear ribonucleoprotein A3	2.9e-23	-	177230812	177232008	0	1	1196,	0	-49.4	-51.9	-0.403	exon (NM_001145413, exon 5 of 5)	exon (NM_001145413, exon 5 of 5)	18616	NR_138470	220988	Hs.516539	NM_194247	protein-coding
2	19896968	19898126	ENSG00000183891	ENSG00000183891	TTC32	tetratricopeptide repeat domain 32	0.14	-	19896968	19898126	0	2	158,258,	0,900	-1.53	-1.98	-0.401	intron (NM_001008237, intron 2 of 2)	intron (NM_001008237, intron 2 of 2)	4436	NM_001008237	130502	Hs.591547	NM_001008237	protein-coding
2	45389276	45393040	ENSG00000068784	ENSG00000205054	LINC01121	long intergenic non-protein coding RNA 1121	0.13	-	45389276	45393040	0	2	323,96,	0,3668	-1.56	-2.01	-0.4	intron (NM_018079, intron 20 of 20)	intron (NM_018079, intron 20 of 20)	-136217	NR_033831	400952	Hs.468368	NR_033831	ncRNA
2	27130755	27131233	ENSG00000138073	ENSG00000138073	PREB	prolactin regulatory element binding	5.6e-06	-	27130755	27131233	0	1	478,	0	-10.7	-12.1	-0.397	TTS (NM_032604)	TTS (NM_032604)	3642	NM_013388	10113	Hs.279784	NM_013388	protein-coding
2	86026839	86027920	ENSG00000068654	ENSG00000068654	POLR1A	RNA polymerase I subunit A	0.15	-	86026839	86027920	0	2	684,36,	0,1045	-1.47	-1.91	-0.39	3' UTR (NM_015425, exon 34 of 34)	3' UTR (NM_015425, exon 34 of 34)	78506	NM_015425	25885	Hs.531818	NM_015425	protein-coding
2	61031438	61032069	ENSG00000162928	ENSG00000162927	PUS10	pseudouridine synthase 10	0.049	+	61031438	61032069	0	1	631,	0	-2.41	-3.02	-0.389	exon (NM_002618, exon 2 of 4)	exon (NM_002618, exon 2 of 4)	-13495	NM_001322127	150962	Hs.368348	NM_144709	protein-coding
2	106093720	106096819	ENSG00000115652	ENSG00000119147	ECRG4	ECRG4 augurin precursor	0.012	-	106093720	106096819	0	2	437,102,	0,2997	-3.69	-4.46	-0.382	intron (NM_025076, intron 14 of 14)	intron (NM_025076, intron 14 of 14)	29582	NM_032411	84417	Hs.43125	NM_032411	protein-coding
2	127941426	127942494	ENSG00000136715	ENSG00000144233	AMMECR1L	AMMECR1 like	0.016	-	127941426	127942494	0	2	738,71,	0,997	-3.38	-4.12	-0.381	3' UTR (NM_001330302, exon 21 of 21)	3' UTR (NM_001330302, exon 21 of 21)	-56020	NM_001199140	83607	Hs.546449	NM_031445	protein-coding
2	32414771	32429192	ENSG00000115760	ENSG00000115760	BIRC6	baculoviral IAP repeat containing 6	9.2e-06	+	32414771	32429192	0	2	1392,47,	0,14374	-10.3	-11.6	-0.38	intron (NM_016252, intron 10 of 73)	L1M4a2|LINE|L1	64954	NM_016252	57448	Hs.150107	NM_016252	protein-coding
2	99399178	99399798	ENSG00000158417	ENSG00000158417	EIF5B	eukaryotic translation initiation factor 5B	0.00027	+	99399178	99399798	0	2	19,492,	0,128	-7.1	-8.22	-0.38	TTS (NM_016316)	TTS (NM_016316)	62099	NM_015904	9669	Hs.158688	NM_015904	protein-coding
2	96594367	96595566	ENSG00000114982	ENSG00000114982	KANSL3	KAT8 regulatory NSL complex subunit 3	0.0042	-	96594367	96595566	0	1	1199,	0	-4.6	-5.47	-0.379	non-coding (NR_047657, exon 21 of 21)	non-coding (NR_047657, exon 21 of 21)	43024	NR_047658	55683	Hs.516341	NM_017991	protein-coding
2	169081130	169083475	ENSG00000073737	ENSG00000073737	DHRS9	dehydrogenase/reductase 9	0.088	+	169081130	169083475	0	3	22,372,147,	0,392,2198	-1.91	-2.43	-0.378	intron (NM_001142271, intron 2 of 4)	intron (NM_001142271, intron 2 of 4)	1196	NM_001142271	10170	Hs.179608	NM_005771	protein-coding
2	27381193	27381761	ENSG00000115241	ENSG00000163795	ZNF513	zinc finger protein 513	3.4e-06	-	27381193	27381761	0	1	568,	0	-11.2	-12.6	-0.377	promoter-TSS (NM_144631)	promoter-TSS (NM_144631)	-743	NM_144631	130557	Hs.515872	NM_144631	protein-coding
2	112531400	112531701	ENSG00000114999	ENSG00000125630	POLR1B	RNA polymerase I subunit B	0.083	+	112531400	112531701	0	1	301,	0	-1.96	-2.49	-0.372	3' UTR (NM_153712, exon 7 of 7)	3' UTR (NM_153712, exon 7 of 7)	-10364	NM_001282776	84172	Hs.745127	NM_019014	protein-coding
2	74156420	74156601	ENSG00000114978	ENSG00000225439	BOLA3-AS1	BOLA3 divergent transcript	0.00053	-	74156420	74156601	0	1	181,	0	-6.48	-7.54	-0.368	3' UTR (NM_001317110, exon 6 of 6)	3' UTR (NM_001317110, exon 6 of 6)	8530	NR_045636	100507171	Hs.503348	NR_045634	ncRNA
2	62943805	62948995	ENSG00000115504	ENSG00000231609	LOC100132215	uncharacterized LOC100132215	0.093	+	62943805	62948995	0	2	45,736,	0,4454	-1.87	-2.38	-0.365	intron (NM_001142615, intron 12 of 22)	intron (NM_001142615, intron 12 of 22)	101311	NR_027069	100132215	Hs.656781	NR_027069	ncRNA
2	195708791	195716912	ENSG00000196950	ENSG00000196950	SLC39A10	solute carrier family 39 member 10	0.052	+	195708791	195716912	0	3	53,121,276,	0,4641,7845	-2.35	-2.95	-0.365	intron (NM_020342, intron 5 of 9)	MIRb|SINE|MIR	55626	NM_020342	57181	Hs.650158	NM_020342	protein-coding
2	218454655	218455607	ENSG00000135913	ENSG00000127831	VIL1	villin 1	0.18	-	218454655	218455607	0	2	362,28,	0,924	-1.31	-1.71	-0.359	intron (NM_020935, intron 25 of 25)	intron (NM_020935, intron 25 of 25)	36008	NM_007127	7429	Hs.654595	NM_007127	protein-coding
2	219220096	219220307	ENSG00000198925	ENSG00000115657	ABCB6	ATP binding cassette subfamily B member 6 (Langereis blood group)	0.14	-	219220096	219220307	0	1	211,	0	-1.53	-1.98	-0.358	non-coding (NR_104255, exon 16 of 16)	non-coding (NR_104255, exon 16 of 16)	-1244	NM_005689	10058	Hs.107911	NM_005689	protein-coding
2	229767195	229768691	ENSG00000153827	ENSG00000187957	DNER	delta/notch like EGF repeat containing	2.8e-05	-	229767195	229768691	0	2	555,76,	0,1420	-9.2	-10.5	-0.357	intron (NM_001348330, intron 41 of 41)	intron (NM_001348330, intron 41 of 41)	-53388	NM_139072	92737	Hs.234074	NM_139072	protein-coding
2	64634338	64634668	ENSG00000179833	ENSG00000179833	SERTAD2	SERTA domain containing 2	0.1	-	64634338	64634668	0	1	330,	0	-1.76	-2.26	-0.354	3' UTR (NM_014755, exon 2 of 2)	3' UTR (NM_014755, exon 2 of 2)	19410	NM_014755	9792	Hs.591569	NM_014755	protein-coding
2	61187905	61188805	ENSG00000173209	ENSG00000173209	AHSA2P	activator of HSP90 ATPase homolog 2, pseudogene	4.1e-06	+	61187905	61188805	0	1	900,	0	-11	-12.4	-0.353	TTS (NR_152211)	TTS (NR_152211)	10937	NR_152215	130872	Hs.655602	NM_152392	pseudo
2	113201163	113202062	ENSG00000125637	ENSG00000125637	PSD4	pleckstrin and Sec7 domain containing 4	0.0045	+	113201163	113202062	0	1	899,	0	-4.53	-5.4	-0.353	3' UTR (NM_012455, exon 17 of 17)	3' UTR (NM_012455, exon 17 of 17)	27642	NM_012455	23550	Hs.516306	NM_012455	protein-coding
2	240527042	240529486	ENSG00000144504	ENSG00000144504	ANKMY1	ankyrin repeat and MYND domain containing 1	0.014	-	240527042	240529486	0	2	839,450,	0,1994	-3.53	-4.29	-0.347	intron (NR_148696, intron 4 of 14)	AluSg7|SINE|Alu	29724	NM_017844	51281	Hs.656615	NM_016552	protein-coding
2	189667125	189667770	ENSG00000138381	ENSG00000138381	ASNSD1	asparagine synthetase domain containing 1	0.0062	+	189667125	189667770	0	2	471,7,	0,638	-4.25	-5.09	-0.342	exon (NM_001353497, exon 3 of 5)	exon (NM_001353497, exon 3 of 5)	5989	NM_019048	54529	Hs.101364	NM_019048	protein-coding
2	61187911	61188949	ENSG00000115464	ENSG00000173209	AHSA2P	activator of HSP90 ATPase homolog 2, pseudogene	8.3e-06	-	61187911	61188949	0	2	830,40,	0,998	-10.3	-11.7	-0.34	TTS (NR_152211)	TTS (NR_152211)	11012	NR_152215	130872	Hs.655602	NM_152392	pseudo
2	159615355	159617082	ENSG00000224152	ENSG00000123636	BAZ2B	bromodomain adjacent to zinc finger domain 2B	0.00026	+	159615355	159617082	0	2	98,1336,	0,391	-7.13	-8.25	-0.336	promoter-TSS (NM_001329858)	promoter-TSS (NM_001329858)	329	NM_013450	29994	Hs.470369	NM_013450	protein-coding
2	159748292	159748503	ENSG00000136536	ENSG00000136536	2022-03-07	membrane associated ring-CH-type finger 7	0.0016	+	159748292	159748503	0	1	211,	0	-5.46	-6.42	-0.33	exon (NM_022826, exon 5 of 10)	exon (NM_022826, exon 5 of 10)	14434	NM_001282807	64844	Hs.529272	NM_022826	protein-coding
2	127307419	127308680	ENSG00000169967	ENSG00000163161	ERCC3	ERCC excision repair 3, TFIIH core complex helicase subunit	0.064	-	127307419	127308680	0	2	385,96,	0,1165	-2.18	-2.75	-0.328	intron (NM_006609, intron 15 of 15)	intron (NM_006609, intron 15 of 15)	-13874	NM_000122	2071	Hs.469872	NM_000122	protein-coding
2	37316239	37317866	ENSG00000115825	ENSG00000115825	PRKD3	protein kinase D3	0.0048	-	37316239	37317866	0	2	940,80,	0,1547	-4.48	-5.34	-0.325	promoter-TSS (NM_005813)	promoter-TSS (NM_005813)	31	NM_005813	23683	Hs.660757	NM_005813	protein-coding
2	17665278	17666445	ENSG00000163029	ENSG00000163029	SMC6	structural maintenance of chromosomes 6	0.024	-	17665278	17666445	0	2	335,26,	0,1141	-3.05	-3.75	-0.324	intron (NM_024624, intron 26 of 26)	intron (NM_024624, intron 26 of 26)	87948	NM_001142286	79677	Hs.526728	NM_024624	protein-coding
2	214769301	214781505	ENSG00000138376	ENSG00000138376	BARD1	BRCA1 associated RING domain 1	0.039	-	214769301	214781505	0	2	11,946,	0,11258	-2.62	-3.25	-0.323	intron (NR_104216, intron 3 of 9)	Tigger1|DNA|TcMar-Tigger	34280	NM_001282543	580	Hs.591642	NM_000465	protein-coding
2	127713638	127717162	ENSG00000136709	ENSG00000173349	SFT2D3	SFT2 domain containing 3	0.052	-	127713638	127717162	0	2	383,8,	0,3516	-2.36	-2.96	-0.321	intron (NM_018383, intron 17 of 21)	(TTCAT)n|Simple_repeat|Simple_repeat	13903	NM_032740	84826	Hs.345849	NM_032740	protein-coding
2	96208407	96208825	ENSG00000084090		STARD7-AS1	STARD7 antisense RNA 1	0.15	-	96208407	96208825	0	1	418,	0	-1.45	-1.88	-0.32	non-coding (NR_046322, exon 1 of 4)	non-coding (NR_046322, exon 1 of 4)	200	NR_046322	285033	Hs.58648	NM_001037228	ncRNA
2	43225113	43225292	ENSG00000152518	ENSG00000152518	ZFP36L2	ZFP36 ring finger protein like 2	0.081	-	43225113	43225292	0	1	179,	0	-1.98	-2.51	-0.319	exon (NM_006887, exon 2 of 2)	exon (NM_006887, exon 2 of 2)	1403	NM_006887	678	Hs.503093	NM_006887	protein-coding
2	61344025	61348344	ENSG00000115464	ENSG00000206937	SNORA70B	small nucleolar RNA, H/ACA box 70B	0.0073	-	61344025	61348344	0	3	4,91,475,	0,2231,3844	-4.1	-4.92	-0.317	intron (NM_014709, intron 15 of 79)	MER3|DNA|hAT-Charlie	71192	NR_003707	100124537	Hs.675825	NR_003707	snoRNA
2	174348199	174350668	ENSG00000138433	ENSG00000217236	SP9	Sp9 transcription factor	1.7e-05	-	174348199	174350668	0	2	973,9,	0,2460	-9.68	-11	-0.315	intron (NM_004882, intron 9 of 9)	AluSg|SINE|Alu	14480	NM_001145250	100131390		NM_001145250	protein-coding
2	38734300	38734751	ENSG00000143891	ENSG00000115875	SRSF7	serine and arginine rich splicing factor 7	0.069	+	38734300	38734751	0	1	451,	0	-2.13	-2.68	-0.313	3' UTR (NM_138801, exon 7 of 7)	3' UTR (NM_138801, exon 7 of 7)	16835	NM_001031684	6432	Hs.309090	NM_006276	protein-coding
2	64551463	64553376	ENSG00000119844	ENSG00000283204	MIR4434	microRNA 4434	8.4e-09	+	64551463	64553376	0	1	1913,	0	-16.9	-18.6	-0.312	exon (NM_203437, exon 2 of 10)	exon (NM_203437, exon 2 of 10)	26907	NR_039633	100616419		NR_039633	ncRNA
2	85581790	85582031	ENSG00000118640	ENSG00000168899	VAMP5	vesicle associated membrane protein 5	0.00044	+	85581790	85582031	0	1	241,	0	-6.66	-7.73	-0.311	3' UTR (NM_003761, exon 3 of 3)	3' UTR (NM_003761, exon 3 of 3)	-2520	NM_006634	10791	Hs.534373	NM_006634	protein-coding
2	157415095	157427368	ENSG00000115165	ENSG00000115165	CYTIP	cytohesin 1 interacting protein	0.028	-	157415095	157427368	0	3	1048,67,18,	0,3427,12255	-2.91	-3.58	-0.306	intron (NM_004288, intron 6 of 7)	L2b|LINE|L2	22857	NM_004288	9595	Hs.270	NM_004288	protein-coding
2	10783929	10784289	ENSG00000143870	ENSG00000143870	PDIA6	protein disulfide isomerase family A member 6	2e-05	-	10783929	10784289	0	1	360,	0	-9.54	-10.8	-0.3	3' UTR (NM_005742, exon 13 of 13)	3' UTR (NM_005742, exon 13 of 13)	28676	NM_005742	10130	Hs.212102	NM_005742	protein-coding
2	169949626	169950046	ENSG00000144357	ENSG00000144357	UBR3	ubiquitin protein ligase E3 component n-recognin 3	0.065	+	169949626	169950046	0	1	420,	0	-2.18	-2.74	-0.299	exon (NM_172070, exon 23 of 39)	exon (NM_172070, exon 23 of 39)	122328	NM_172070	130507	Hs.379548	NM_172070	protein-coding
2	10783919	10784306	ENSG00000143882	ENSG00000143870	PDIA6	protein disulfide isomerase family A member 6	1.4e-05	+	10783919	10784306	0	1	387,	0	-9.83	-11.2	-0.298	3' UTR (NM_005742, exon 13 of 13)	3' UTR (NM_005742, exon 13 of 13)	28672	NM_005742	10130	Hs.212102	NM_005742	protein-coding
2	42351171	42352908	ENSG00000115944	ENSG00000115944	COX7A2L	cytochrome c oxidase subunit 7A2 like	0.012	-	42351171	42352908	0	2	188,22,	0,1715	-3.68	-4.45	-0.298	intron (NM_001319036, intron 3 of 3)	intron (NM_001319036, intron 3 of 3)	7998	NR_134948	9167	Hs.339639	NM_004718	protein-coding
2	71109683	71116828	ENSG00000124370	ENSG00000124370	MCEE	methylmalonyl-CoA epimerase	0.14	-	71109683	71116828	0	3	439,96,56,	0,1079,7089	-1.53	-1.98	-0.298	intron (NM_032601, intron 2 of 2)	L1MC3|LINE|L1	16973	NM_032601	84693	Hs.94949	NM_032601	protein-coding
2	95087236	95087507	ENSG00000144029	ENSG00000144029	MRPS5	mitochondrial ribosomal protein S5	0.14	-	95087236	95087507	0	1	271,	0	-1.49	-1.94	-0.298	exon (NM_001321995, exon 12 of 12)	exon (NM_001321995, exon 12 of 12)	34185	NM_001321995	64969	Hs.655259	NM_031902	protein-coding
2	219182035	219182665	ENSG00000144567	ENSG00000144567	RETREG2	reticulophagy regulator family member 2	0.014	+	219182035	219182665	0	1	630,	0	-3.5	-4.25	-0.296	exon (NM_024293, exon 9 of 9)	exon (NM_024293, exon 9 of 9)	3641	NM_001321110	79137	Hs.516707	NM_024293	protein-coding
2	201234104	201241010	ENSG00000064012	ENSG00000064012	CASP8	caspase 8	0.17	+	201234104	201241010	0	2	8,741,	0,6165	-1.36	-1.78	-0.293	intron (NM_033355, intron 2 of 9)	intron (NM_033355, intron 2 of 9)	4094	NM_001080124	841	Hs.599762	NM_001228	protein-coding
2	128187307	128190138	ENSG00000136731	ENSG00000136731	UGGT1	UDP-glucose glycoprotein glucosyltransferase 1	0.0082	+	128187307	128190138	0	3	12,166,422,	0,141,2409	-3.99	-4.8	-0.292	intron (NR_027671, intron 40 of 40)	AluJb|SINE|Alu	97523	NR_027671	56886	Hs.743306	NM_020120	protein-coding
2	241495311	241496425	ENSG00000115694	ENSG00000115694	STK25	serine/threonine kinase 25	0.044	-	241495311	241496425	0	2	390,30,	0,1084	-2.51	-3.13	-0.291	intron (NM_001271978, intron 10 of 10)	intron (NM_001271978, intron 10 of 10)	12477	NM_001271978	10494	Hs.516807	NM_006374	protein-coding
2	67404372	67405270	ENSG00000143971	ENSG00000143971	ETAA1	ETAA1 activator of ATR kinase	0.069	+	67404372	67405270	0	1	898,	0	-2.12	-2.67	-0.289	exon (NM_019002, exon 5 of 6)	exon (NM_019002, exon 5 of 6)	7488	NM_019002	54465	Hs.353022	NM_019002	protein-coding
2	230401635	230403284	ENSG00000185404	ENSG00000067066	SP100	SP100 nuclear antigen	0.039	+	230401635	230403284	0	2	172,487,	0,1162	-2.62	-3.25	-0.289	intron (NM_001352892, intron 18 of 18)	intron (NM_001352892, intron 18 of 18)	-13696	NM_001206702	6672	Hs.369056	NM_003113	protein-coding
2	10047726	10052737	ENSG00000172059	ENSG00000172059	KLF11	Kruppel like factor 11	0.019	+	10047726	10052737	0	2	869,511,	0,4500	-3.25	-3.96	-0.283	intron (NM_001177716, intron 3 of 3)	AluSg|SINE|Alu	5987	NM_001177718	8462	Hs.12229	NM_003597	protein-coding
2	222933703	222941917	ENSG00000123983	ENSG00000123983	ACSL3	acyl-CoA synthetase long chain family member 3	0.00054	+	222933703	222941917	0	3	20,158,421,	0,826,7793	-6.47	-7.53	-0.283	intron (NM_004457, intron 16 of 16)	L1MB2|LINE|L1	76774	NM_203372	2181	Hs.655772	NM_004457	protein-coding
2	61045800	61049110	ENSG00000162928	ENSG00000162929	KIAA1841	KIAA1841	0.074	+	61045800	61049110	0	2	51,639,	0,2671	-2.06	-2.61	-0.282	intron (NM_002618, intron 3 of 3)	intron (NM_002618, intron 3 of 3)	-18415	NM_001330432	84542	Hs.468653	NM_032506	protein-coding
2	200489910	200495930	ENSG00000155729	ENSG00000155729	KCTD18	potassium channel tetramerization domain containing 18	0.16	-	200489910	200495930	0	3	706,103,61,	0,3261,5959	-1.43	-1.86	-0.279	intron (NM_001321550, intron 6 of 6)	intron (NM_001321550, intron 6 of 6)	17148	NM_001321548	130535	Hs.605775	NM_152387	protein-coding
2	169546285	169546674	ENSG00000138399	ENSG00000138399	FASTKD1	FAST kinase domains 1	0.03	-	169546285	169546674	0	1	389,	0	-2.84	-3.5	-0.276	exon (NM_001322046, exon 8 of 15)	exon (NM_001322046, exon 8 of 15)	27385	NM_024622	79675	Hs.529276	NM_024622	protein-coding
2	95814489	95815144	ENSG00000232931		LINC00342	long intergenic non-protein coding RNA 342	0.14	-	95814489	95815144	0	1	655,	0	-1.51	-1.96	-0.275	intron (NR_103734, intron 1 of 2)	intron (NR_103734, intron 1 of 2)	12164	NR_103734	150759	Hs.503463	NR_103734	ncRNA
2	207578030	207597597	ENSG00000118260				0.0075	+	207578030	207597597	0	2	35,684,	0,18883	-4.08	-4.89	-0.274	intron (NM_001330133, intron 3 of 3)	L1MA5|LINE|L1	28692	NM_001371428
2	219234225	219234436	ENSG00000163516	ENSG00000163516	ANKZF1	ankyrin repeat and zinc finger peptidyl tRNA hydrolase 1	0.097	+	219234225	219234436	0	1	211,	0	-1.83	-2.33	-0.27	intron (NM_001282792, intron 6 of 10)	intron (NM_001282792, intron 6 of 10)	4525	NM_001042410	55139	Hs.437647	NM_018089	protein-coding
2	238035853	238041797	ENSG00000184182	ENSG00000132330	SCLY	selenocysteine lyase	0.071	+	238035853	238041797	0	2	87,510,	0,5434	-2.09	-2.64	-0.269	intron (NR_037904, intron 7 of 18)	L2a|LINE|L2	-22176	NM_016510	51540	Hs.731909	NM_016510	protein-coding
2	86144321	86144651	ENSG00000132305	ENSG00000208772	SNORD94	small nucleolar RNA, C/D box 94	0.0014	-	86144321	86144651	0	1	330,	0	-5.62	-6.6	-0.258	exon (NM_001100170, exon 15 of 15)	exon (NM_001100170, exon 15 of 15)	8616	NR_004378	692225	Hs.723087	NR_004378	snoRNA
2	17780647	17782115	ENSG00000178295	ENSG00000178295	GEN1	GEN1 Holliday junction 5' flap endonuclease	0.0042	+	17780647	17782115	0	1	1468,	0	-4.6	-5.48	-0.256	exon (NM_001130009, exon 14 of 14)	exon (NM_001130009, exon 14 of 14)	27243	NM_001130009	348654	Hs.467793	NM_182625	protein-coding
2	32617730	32618060	ENSG00000115760	ENSG00000018699	TTC27	tetratricopeptide repeat domain 27	0.17	+	32617730	32618060	0	1	330,	0	-1.38	-1.79	-0.25	exon (NM_016252, exon 74 of 74)	exon (NM_016252, exon 74 of 74)	-10155	NM_001193509	55622	Hs.468125	NM_017735	protein-coding
2	222908958	222909634	ENSG00000123983	ENSG00000123983	ACSL3	acyl-CoA synthetase long chain family member 3	0.045	+	222908958	222909634	0	2	192,19,	0,657	-2.49	-3.1	-0.25	intron (NM_004457, intron 4 of 16)	intron (NM_004457, intron 4 of 16)	48260	NM_203372	2181	Hs.655772	NM_004457	protein-coding
2	101007616	101008217	ENSG00000204634	ENSG00000071082	RPL31	ribosomal protein L31	0.0051	-	101007616	101008217	0	1	601,	0	-4.42	-5.28	-0.247	TTS (NM_000993)	TTS (NM_000993)	5628	NM_000993	6160	Hs.469473	NM_000993	protein-coding
2	100391859	100395560	ENSG00000115526	ENSG00000115526	CHST10	carbohydrate sulfotransferase 10	0.049	-	100391859	100395560	0	2	1923,52,	0,3649	-2.41	-3.01	-0.246	exon (NM_004854, exon 7 of 7)	exon (NM_004854, exon 7 of 7)	23958	NM_004854	9486	Hs.516370	NM_004854	protein-coding
2	179944875	179950570	ENSG00000163510	ENSG00000163510	CWC22	CWC22 spliceosome associated protein homolog	0.00063	-	179944875	179950570	0	2	840,59,	0,5636	-6.32	-7.37	-0.245	intron (NM_020943, intron 19 of 19)	intron (NM_020943, intron 19 of 19)	59574	NM_020943	57703	Hs.311363	NM_020943	protein-coding
2	38073910	38074769	ENSG00000138061	ENSG00000138061	CYP1B1	cytochrome P450 family 1 subfamily B member 1	0.095	-	38073910	38074769	0	2	26,424,	0,435	-1.84	-2.35	-0.244	intron (NM_000104, intron 2 of 2)	CpG	1841	NM_000104	1545	Hs.154654	NM_000104	protein-coding
2	182717052	182718251	ENSG00000077232	ENSG00000077232	DNAJC10	DnaJ heat shock protein family (Hsp40) member C10	0.059	+	182717052	182718251	0	2	20,311,	0,888	-2.25	-2.83	-0.244	intron (NR_073367, intron 2 of 22)	intron (NR_073367, intron 2 of 22)	1395	NR_073365	54431	Hs.516632	NM_018981	protein-coding
2	189665404	189666411	ENSG00000138381	ENSG00000138381	ASNSD1	asparagine synthetase domain containing 1	0.0088	+	189665404	189666411	0	2	47,371,	0,636	-3.92	-4.73	-0.243	intron (NM_019048, intron 3 of 5)	intron (NM_019048, intron 3 of 5)	4449	NM_019048	54529	Hs.101364	NM_019048	protein-coding
2	43223742	43224547	ENSG00000152518	ENSG00000152518	ZFP36L2	ZFP36 ring finger protein like 2	3.4e-09	-	43223742	43224547	0	1	805,	0	-17.7	-19.5	-0.242	3' UTR (NM_006887, exon 2 of 2)	3' UTR (NM_006887, exon 2 of 2)	2461	NM_006887	678	Hs.503093	NM_006887	protein-coding
2	197497166	197497287	ENSG00000144381	ENSG00000144381	HSPD1	heat shock protein family D (Hsp60) member 1	0.0077	-	197497166	197497287	0	1	121,	0	-4.05	-4.87	-0.24	exon (NM_002156, exon 3 of 12)	exon (NM_002156, exon 3 of 12)	2613	NM_002156	3329	Hs.595053	NM_002156	protein-coding
2	18554931	18560201	ENSG00000240857	ENSG00000240857	RDH14	retinol dehydrogenase 14	0.083	-	18554931	18560201	0	2	877,22,	0,5248	-1.96	-2.49	-0.237	intron (NM_001199103, intron 8 of 8)	intron (NM_001199103, intron 8 of 8)	3087	NM_020905	57665	Hs.120319	NM_020905	protein-coding
2	69940188	69940609	ENSG00000059728	ENSG00000244617	ASPRV1	aspartic peptidase retroviral like 1	0.15	+	69940188	69940609	0	1	421,	0	-1.47	-1.9	-0.236	3' UTR (NM_002357, exon 6 of 6)	3' UTR (NM_002357, exon 6 of 6)	21866	NM_152792	151516	Hs.516253	NM_152792	protein-coding
2	97772371	97793302	ENSG00000075568	ENSG00000115085	ZAP70	zeta chain of T cell receptor associated protein kinase 70	0.014	-	97772371	97793302	0	4	53,176,599,13,	0,3471,20014,20918	-3.52	-4.27	-0.235	intron (NM_015348, intron 31 of 40)	L1MD1|LINE|L1	48431	NM_207519	7535	Hs.234569	NM_001079	protein-coding
2	85607786	85608979	ENSG00000168887	ENSG00000168887	C2orf68	chromosome 2 open reading frame 68	0.062	-	85607786	85608979	0	1	1193,	0	-2.21	-2.78	-0.23	3' UTR (NM_001013649, exon 4 of 4)	3' UTR (NM_001013649, exon 4 of 4)	3683	NM_001013649	388969	Hs.516159	NM_001013649	protein-coding
2	201281903	201286574	ENSG00000064012	ENSG00000064012	CASP8	caspase 8	0.17	+	201281903	201286574	0	3	12,502,116,	0,2912,4555	-1.35	-1.76	-0.229	intron (NR_111983, intron 7 of 8)	SVA_E|Retroposon|SVA	23703	NM_033356	841	Hs.599762	NM_001228	protein-coding
2	70088224	70088788	ENSG00000169564	ENSG00000169564	PCBP1	poly(rC) binding protein 1	1.9e-14	+	70088224	70088788	0	1	564,	0	-29.5	-31.6	-0.228	exon (NM_006196, exon 1 of 1)	exon (NM_006196, exon 1 of 1)	1029	NM_006196	5093	Hs.2853	NM_006196	protein-coding
2	96251713	96253836	ENSG00000135956	ENSG00000135956	TMEM127	transmembrane protein 127	0.00012	-	96251713	96253836	0	1	2123,	0	-7.82	-9	-0.227	3' UTR (NM_001193304, exon 4 of 4)	3' UTR (NM_001193304, exon 4 of 4)	13222	NM_001193304	55654	Hs.164303	NM_017849	protein-coding
2	66571232	66571832	ENSG00000143995	ENSG00000232046	LINC01798	long intergenic non-protein coding RNA 1798	0.011	+	66571232	66571832	0	1	600,	0	-3.7	-4.47	-0.226	3' UTR (NM_002398, exon 13 of 13)	3' UTR (NM_002398, exon 13 of 13)	-2498	NR_110156	100507073	Hs.667940	NR_110156	ncRNA
2	229840884	229860489	ENSG00000153827	ENSG00000153827	TRIP12	thyroid hormone receptor interactor 12	0.00012	-	229840884	229860489	0	3	43,803,84,	0,17887,19521	-7.86	-9.04	-0.226	intron (NM_001348330, intron 4 of 41)	LTR12C|LTR|ERV1	70992	NM_001348334	9320	Hs.572642	NM_004238	protein-coding
2	208325504	208326283	ENSG00000115020	ENSG00000144407	PTH2R	parathyroid hormone 2 receptor	0.047	+	208325504	208326283	0	1	779,	0	-2.44	-3.05	-0.225	exon (NM_015040, exon 20 of 42)	exon (NM_015040, exon 20 of 42)	-33798	NM_001309516	5746	Hs.570296	NM_005048	protein-coding
2	70297022	70297473	ENSG00000035141	ENSG00000143977	SNRPG	small nuclear ribonucleoprotein polypeptide G	0.16	-	70297022	70297473	0	1	451,	0	-1.42	-1.84	-0.224	3' UTR (NM_001329752, exon 3 of 3)	3' UTR (NM_001329752, exon 3 of 3)	-3477	NM_001317171	6637	Hs.465167	NM_003096	protein-coding
2	219250280	219251300	ENSG00000127824	ENSG00000243910	TUBA4B	tubulin alpha 4b	0.076	-	219250280	219251300	0	1	1020,	0	-2.04	-2.58	-0.222	TTS (NM_001330213)	TTS (NM_001330213)	-2453	NM_001355221	80086	Hs.664469	NM_001355221	protein-coding
2	27041065	27041186	ENSG00000119777	ENSG00000119777	TMEM214	transmembrane protein 214	0.14	+	27041065	27041186	0	1	121,	0	-1.5	-1.95	-0.221	3' UTR (NM_017727, exon 17 of 17)	3' UTR (NM_017727, exon 17 of 17)	8161	NM_001083590	54867	Hs.533934	NM_017727	protein-coding
2	219172616	219173037	ENSG00000115649	ENSG00000213901	SLC23A3	solute carrier family 23 member 3	0.1	-	219172616	219173037	0	1	421,	0	-1.76	-2.26	-0.221	exon (NM_015680, exon 8 of 8)	exon (NM_015680, exon 8 of 8)	-2798	NM_001144890	151295	Hs.124565	NM_144712	protein-coding
2	218753606	218754549	ENSG00000135912	ENSG00000135929	CYP27A1	cytochrome P450 family 27 subfamily A member 1	0.14	+	218753606	218754549	0	2	63,416,	0,527	-1.52	-1.96	-0.22	intron (NM_014640, intron 19 of 19)	intron (NM_014640, intron 19 of 19)	-28069	NM_000784	1593	Hs.516700	NM_000784	protein-coding
2	9489982	9492910	ENSG00000151694	ENSG00000134330	IAH1	isoamyl acetate hydrolyzing esterase 1 (putative)	0.052	-	9489982	9492910	0	3	536,51,13,	0,1118,2915	-2.37	-2.96	-0.219	intron (NM_003183, intron 17 of 18)	intron (NM_003183, intron 17 of 18)	16391	NM_001320858	285148	Hs.667226	NM_001039613	protein-coding
2	27657349	27661384	ENSG00000119760	ENSG00000163798	SLC4A1AP	solute carrier family 4 member 1 adaptor protein	0.016	-	27657349	27661384	0	2	320,401,	0,3634	-3.38	-4.11	-0.218	intron (NM_001282732, intron 2 of 4)	L1MC4|LINE|L1	-4104	NM_018158	22950	Hs.306000	NM_018158	protein-coding
2	48328681	48346749	ENSG00000170802	ENSG00000170802	FOXN2	forkhead box N2	0.14	+	48328681	48346749	0	2	21,549,	0,17519	-1.53	-1.97	-0.215	intron (NM_002158, intron 2 of 6)	L1ME3E|LINE|L1	23033	NM_002158	3344	Hs.468478	NM_002158	protein-coding
2	161230976	161235651	ENSG00000136560	ENSG00000227403	LINC01806	long intergenic non-protein coding RNA 1806	0.0019	+	161230976	161235651	0	3	575,165,310,	0,1756,4365	-5.33	-6.28	-0.215	intron (NM_001199135, intron 7 of 7)	AluJr|SINE|Alu	-11425	NR_110164	100996579	Hs.660929	NR_110163	ncRNA
2	74046855	74047455	ENSG00000187605	ENSG00000187605	TET3	tet methylcytosine dioxygenase 3	0.13	+	74046855	74047455	0	1	600,	0	-1.6	-2.06	-0.214	exon (NM_001366022, exon 3 of 11)	exon (NM_001366022, exon 3 of 11)	44463	NM_001366022	200424	Hs.208546	NM_001287491	protein-coding
2	186507431	186508976	ENSG00000065548	ENSG00000065548	ZC3H15	zinc finger CCCH-type containing 15	0.002	+	186507431	186508976	0	2	43,434,	0,1111	-5.29	-6.23	-0.211	intron (NM_018471, intron 9 of 9)	intron (NM_018471, intron 9 of 9)	21944	NM_018471	55854	Hs.741180	NM_018471	protein-coding
2	231807670	231807969	ENSG00000144524	ENSG00000144524	COPS7B	COP9 signalosome subunit 7B	0.17	+	231807670	231807969	0	1	299,	0	-1.36	-1.77	-0.21	3' UTR (NM_001282949, exon 6 of 6)	3' UTR (NM_001282949, exon 6 of 6)	21375	NM_001308381	64708	Hs.335061	NM_022730	protein-coding
2	62222317	62223450	ENSG00000170340	ENSG00000170340	B3GNT2	UDP-GlcNAc:betaGal beta-1,3-N-acetylglucosaminyltransferase 2	0.0078	+	62222317	62223450	0	1	1133,	0	-4.03	-4.85	-0.205	exon (NM_001319075, exon 2 of 2)	exon (NM_001319075, exon 2 of 2)	7363	NM_001319075	10678	Hs.173203	NM_006577	protein-coding
2	65020933	65021682	ENSG00000115902	ENSG00000115902	SLC1A4	solute carrier family 1 member 4	0.014	+	65020933	65021682	0	1	749,	0	-3.5	-4.25	-0.205	3' UTR (NM_001348407, exon 8 of 8)	3' UTR (NM_001348407, exon 8 of 8)	31909	NM_003038	6509	Hs.654352	NM_003038	protein-coding
2	74047753	74073579	ENSG00000187605	ENSG00000187605	TET3	tet methylcytosine dioxygenase 3	0.12	+	74047753	74073579	0	2	658,31,	0,25795	-1.65	-2.12	-0.205	intron (NM_001287491, intron 4 of 11)	SVA_D|Retroposon|SVA	57974	NM_001366022	200424	Hs.208546	NM_001287491	protein-coding
2	17783641	17784750	ENSG00000178295	ENSG00000178295	GEN1	GEN1 Holliday junction 5' flap endonuclease	0.051	+	17783641	17784750	0	1	1109,	0	-2.38	-2.97	-0.201	3' UTR (NM_001130009, exon 14 of 14)	3' UTR (NM_001130009, exon 14 of 14)	30058	NM_001130009	348654	Hs.467793	NM_182625	protein-coding
2	47807675	47808356	ENSG00000138081	ENSG00000116062	MSH6	mutS homolog 6	0.026	-	47807675	47808356	0	2	572,28,	0,653	-2.97	-3.65	-0.197	3' UTR (NM_001190274, exon 23 of 23)	3' UTR (NM_001190274, exon 23 of 23)	24061	NM_001281494	2956	Hs.445052	NM_000179	protein-coding
2	206004259	206007298	ENSG00000114933	ENSG00000114933	INO80D	INO80 complex subunit D	0.16	-	206004259	206007298	0	2	1274,15,	0,3024	-1.43	-1.86	-0.194	intron (NM_017759, intron 10 of 10)	intron (NM_017759, intron 10 of 10)	80395	NM_017759	54891	Hs.445036	NM_017759	protein-coding
2	28412101	28413509	ENSG00000075426	ENSG00000229951	FLJ31356	uncharacterized protein FLJ31356	0.00025	+	28412101	28413509	0	1	1408,	0	-7.16	-8.28	-0.192	3' UTR (NM_005253, exon 4 of 4)	3' UTR (NM_005253, exon 4 of 4)	-18133	NR_103831	403150	Hs.562970	NR_103831	ncRNA
2	195680067	195680996	ENSG00000196950	ENSG00000196950	SLC39A10	solute carrier family 39 member 10	0.11	+	195680067	195680996	0	1	929,	0	-1.75	-2.24	-0.187	exon (NM_001127257, exon 2 of 10)	exon (NM_001127257, exon 2 of 10)	23306	NM_020342	57181	Hs.650158	NM_020342	protein-coding
2	44169207	44202041	ENSG00000285542	ENSG00000138032	PPM1B	protein phosphatase, Mg2+/Mn2+ dependent 1B	0.0063	+	44169207	44202041	0	2	67,856,	0,31978	-4.23	-5.07	-0.185	intron (NM_177969, intron 1 of 4)	intron (NM_177969, intron 1 of 4)	16749	NM_177968	5495	Hs.416769	NM_002706	protein-coding
2	47807674	47808304	ENSG00000116062	ENSG00000116062	MSH6	mutS homolog 6	0.037	+	47807674	47808304	0	1	630,	0	-2.65	-3.29	-0.183	3' UTR (NM_001190274, exon 23 of 23)	3' UTR (NM_001190274, exon 23 of 23)	24034	NM_001281494	2956	Hs.445052	NM_000179	protein-coding
2	44169224	44209229	ENSG00000138032	ENSG00000138032	PPM1B	protein phosphatase, Mg2+/Mn2+ dependent 1B	0.0072	+	44169224	44209229	0	3	50,860,20,	0,31961,39985	-4.11	-4.94	-0.181	intron (NM_177969, intron 1 of 4)	intron (NM_177969, intron 1 of 4)	20352	NM_177968	5495	Hs.416769	NM_002706	protein-coding
2	169571676	169573128	ENSG00000138399	ENSG00000138399	FASTKD1	FAST kinase domains 1	0.18	-	169571676	169573128	0	2	495,133,	0,1319	-1.33	-1.74	-0.181	intron (NM_024622, intron 1 of 14)	intron (NM_024622, intron 1 of 14)	1463	NM_024622	79675	Hs.529276	NM_024622	protein-coding
2	202206564	202207099	ENSG00000116030	ENSG00000116030	SUMO1	small ubiquitin like modifier 1	0.011	-	202206564	202207099	0	1	535,	0	-3.72	-4.5	-0.181	non-coding (NR_163943, exon 6 of 6)	non-coding (NR_163943, exon 6 of 6)	31765	NM_001005781	7341	Hs.81424	NM_003352	protein-coding
2	37645209	37647401	ENSG00000163171	ENSG00000163171	CDC42EP3	CDC42 effector protein 3	5.1e-08	-	37645209	37647401	0	2	1613,8,	0,2184	-15.2	-16.8	-0.177	exon (NM_001270437, exon 2 of 2)	exon (NM_001270437, exon 2 of 2)	25894	NM_001270437	10602	Hs.369574	NM_006449	protein-coding
2	71130642	71133564	ENSG00000124383	ENSG00000124383	MPHOSPH10	M-phase phosphoprotein 10	0.059	+	71130642	71133564	0	2	203,667,	0,2255	-2.25	-2.83	-0.172	intron (NM_005791, intron 1 of 10)	L2a|LINE|L2	1469	NM_005791	10199	Hs.656208	NM_005791	protein-coding
2	46699416	46760195	ENSG00000171150	ENSG00000171150	SOCS5	suppressor of cytokine signaling 5	0.12	+	46699416	46760195	0	2	33,1677,	0,59102	-1.67	-2.15	-0.165	intron (NM_144949, intron 1 of 1)	Tigger3b|DNA|TcMar-Tigger	30511	NM_144949	9655	Hs.468426	NM_014011	protein-coding
2	105339704	105345373	ENSG00000135974	ENSG00000135974	C2orf49	chromosome 2 open reading frame 49	0.14	+	105339704	105345373	0	3	45,376,59,	0,3143,5610	-1.53	-1.98	-0.163	intron (NM_001286537, intron 2 of 4)	intron (NM_001286537, intron 2 of 4)	4999	NM_001286537	79074	Hs.549577	NM_024093	protein-coding
2	64635473	64653652	ENSG00000179833	ENSG00000179833	SERTAD2	SERTA domain containing 2	0.11	-	64635473	64653652	0	2	1402,33,	0,18146	-1.69	-2.17	-0.161	intron (NM_014755, intron 1 of 1)	intron (NM_014755, intron 1 of 1)	9350	NM_014755	9792	Hs.591569	NM_014755	protein-coding
[truncated: 9,253 more rows]
