# Supplementary material for: Eltrombopag as an Allosteric Inhibitor of the METTL3-14 Complex Affecting the m6A Methylation of RNA in Acute Myeloid Leukemia Cells
Source: Pharmaceuticals (Basel). 2022 Apr 1;15(4):440. doi: 10.3390/ph15040440 (PMC9032718; doi:10.3390/ph15040440)
Supplement: Supplementary file 1 [file pharmaceuticals-15-00440-s001.zip › pharmaceuticals-1632371-supplementary/Supplementary Table S2.xlsx]

## Sheet: Sheet1
Supplementary Table S2. Differential m6A methylation sites in shMETTL3-treated Molm-13 cells.
# chr	chromStart	chromEnd	name	score	strand	thickStart	thickEnd	itemRgb	blockCount	blockSizes	blockStarts	diff.lg.fdr	diff.lg.p	diff.log2.fc
1	160565420	160565541	ENSG00000066294	0.017	-	160565420	160565541	0	1	121,	0	-3.47	-4.1	-4.82
1	206098226	206098436	ENSG00000263961	0.014	+	206098226	206098436	0	1	210,	0	-3.61	-4.25	-3.68
1	155521109	155521409	ENSG00000116539	0.087	-	155521109	155521409	0	1	300,	0	-1.98	-2.44	-3.6
1	2185184	2185335	ENSG00000067606	0.002	+	2185184	2185335	0	1	151,	0	-5.44	-6.22	-3.46
1	2185180	2185331	ENSG00000162585	0.0016	-	2185180	2185331	0	1	151,	0	-5.61	-6.41	-3.46
1	182616000	182616629	ENSG00000261504	0.0063	+	182616000	182616629	0	1	629,	0	-4.35	-5.07	-3.45
1	89933256	89933317	ENSG00000171492	0.004	+	89933256	89933317	0	1	61,	0	-4.78	-5.52	-3.11
1	247100291	247100622	ENSG00000188295	0.063	-	247100291	247100622	0	1	331,	0	-2.27	-2.77	-2.98
1	52431239	52431330	ENSG00000134744	2e-05	-	52431239	52431330	0	1	91,	0	-9.79	-10.8	-2.94
1	155438606	155438996	ENSG00000116539	0.044	-	155438606	155438996	0	1	390,	0	-2.59	-3.13	-2.91
1	206461475	206461566	ENSG00000266028	0.027	+	206461475	206461566	0	1	91,	0	-3.02	-3.61	-2.88
1	236543189	236543340	ENSG00000116977	0.077	+	236543189	236543340	0	1	151,	0	-2.08	-2.56	-2.88
1	37799806	37800646	ENSG00000233728	0.0061	-	37799806	37800646	0	2	363,17,	0,823	-4.39	-5.1	-2.84
1	212686417	212697012	ENSG00000123685	0.00068	-	212686417	212697012	0	3	562,43,52,	0,1049,10543	-6.45	-7.3	-2.8
1	35566601	35566691	ENSG00000020129	0.00019	+	35566601	35566691	0	1	90,	0	-7.63	-8.55	-2.77
1	201027802	201028133	ENSG00000229191	0.11	+	201027802	201028133	0	1	331,	0	-1.79	-2.23	-2.75
1	37799822	37800181	ENSG00000185090	0.01	+	37799822	37800181	0	1	359,	0	-3.93	-4.61	-2.74
1	45509073	45509164	ENSG00000132763	0.064	+	45509073	45509164	0	1	91,	0	-2.24	-2.75	-2.71
1	213001856	213002036	ENSG00000174606	0.094	-	213001856	213002036	0	1	180,	0	-1.9	-2.36	-2.71
1	157125561	157125742	ENSG00000117036	0.16	-	157125561	157125742	0	1	181,	0	-1.46	-1.85	-2.62
1	223951870	223952199	ENSG00000272645	6.1e-05	-	223951870	223952199	0	1	329,	0	-8.74	-9.71	-2.59
1	236550643	236550883	ENSG00000116977	1e-11	+	236550643	236550883	0	1	240,	0	-23.8	-25.3	-2.58
1	197102309	197102520	ENSG00000066279	0.14	-	197102309	197102520	0	1	211,	0	-1.59	-2	-2.57
1	20942044	20942225	ENSG00000075151	0.00068	-	20942044	20942225	0	1	181,	0	-6.45	-7.29	-2.56
1	236550652	236550892	ENSG00000119285	1.5e-11	-	236550652	236550892	0	1	240,	0	-23.5	-24.9	-2.52
1	205619008	205619383	ENSG00000158711	0.09	-	205619008	205619383	0	2	65,116,	0,259	-1.95	-2.41	-2.5
1	223798289	223798499	ENSG00000143514	0.0031	-	223798289	223798499	0	1	210,	0	-5.02	-5.77	-2.49
1	231000149	231000595	ENSG00000173409	7e-18	+	231000149	231000595	0	1	446,	0	-37.7	-39.5	-2.44
1	37997128	37997189	ENSG00000183386	0.0061	-	37997128	37997189	0	1	61,	0	-4.39	-5.1	-2.43
1	245122395	245122486	ENSG00000203666	0.15	+	245122395	245122486	0	1	91,	0	-1.51	-1.91	-2.41
1	156525404	156525615	ENSG00000183856	2.3e-15	-	156525404	156525615	0	1	211,	0	-32	-33.7	-2.41
1	11974790	11974881	ENSG00000083444	2.3e-06	+	11974790	11974881	0	1	91,	0	-11.9	-13	-2.4
1	211941711	211942040	ENSG00000143493	1.9e-07	-	211941711	211942040	0	1	329,	0	-14.3	-15.5	-2.4
1	232983524	232984364	ENSG00000135749	0.0001	-	232983524	232984364	0	1	840,	0	-8.24	-9.19	-2.39
1	77632070	77632639	ENSG00000036549	0.0089	-	77632070	77632639	0	1	569,	0	-4.03	-4.72	-2.38
1	27355183	27355363	ENSG00000142733	0.063	-	27355183	27355363	0	1	180,	0	-2.26	-2.76	-2.37
1	108932359	108932570	ENSG00000121957	0.08	+	108932359	108932570	0	1	211,	0	-2.05	-2.53	-2.34
1	197101109	197101620	ENSG00000066279	0.0024	-	197101109	197101620	0	1	511,	0	-5.28	-6.05	-2.33
1	236551242	236551423	ENSG00000116977	0.00015	+	236551242	236551423	0	1	181,	0	-7.86	-8.78	-2.32
1	149923376	149923437	ENSG00000143368	0.00018	-	149923376	149923437	0	1	61,	0	-7.71	-8.63	-2.31
1	219272703	219273060	ENSG00000277007	0.15	+	219272703	219273060	0	1	357,	0	-1.5	-1.89	-2.26
1	24358017	24358467	ENSG00000001460	0.0054	-	24358017	24358467	0	1	450,	0	-4.51	-5.23	-2.26
1	77632758	77633088	ENSG00000036549	0.15	-	77632758	77633088	0	1	330,	0	-1.48	-1.88	-2.2
1	155614399	155614967	ENSG00000125459	0.00031	+	155614399	155614967	0	1	568,	0	-7.19	-8.08	-2.19
1	232806112	232807245	ENSG00000212916	6.1e-06	+	232806112	232807245	0	1	1133,	0	-10.9	-12	-2.19
1	39758139	39758290	ENSG00000116985	0.049	-	39758139	39758290	0	1	151,	0	-2.48	-3.01	-2.19
1	206496202	206496441	ENSG00000263528	3.7e-06	+	206496202	206496441	0	1	239,	0	-11.4	-12.5	-2.18
1	1598964	1599143	ENSG00000228594	0.017	-	1598964	1599143	0	1	179,	0	-3.45	-4.08	-2.17
1	35560461	35560582	ENSG00000020129	0.17	+	35560461	35560582	0	1	121,	0	-1.42	-1.8	-2.15
1	233379615	233382779	ENSG00000143674	0.035	+	233379615	233382779	0	2	95,475,	0,2689	-2.79	-3.36	-2.15
1	151340647	151340707	ENSG00000224645	0.028	+	151340647	151340707	0	1	60,	0	-3	-3.58	-2.14
1	1066126	1066336	ENSG00000217801	0.12	+	1066126	1066336	0	1	210,	0	-1.73	-2.16	-2.13
1	1233812	1234202	ENSG00000176022	1e-06	+	1233812	1234202	0	1	390,	0	-12.7	-13.8	-2.13
1	160681195	160681434	ENSG00000117091	0.0049	-	160681195	160681434	0	1	239,	0	-4.59	-5.32	-2.11
1	200911644	200911705	ENSG00000163362	0.14	+	200911644	200911705	0	1	61,	0	-1.56	-1.97	-2.1
1	52389251	52396211	ENSG00000085840	0.0025	-	52389251	52396211	0	3	70,361,166,	0,4191,6794	-5.21	-5.98	-2.1
1	23757067	23759514	ENSG00000011007	0.15	+	23757067	23759514	0	2	58,3,	0,2444	-1.53	-1.93	-2.09
1	32171051	32171109	ENSG00000250135	0.13	+	32171051	32171109	0	1	58,	0	-1.6	-2.01	-2.09
1	192181424	192184472	ENSG00000150681	0.15	+	192181424	192184472	0	2	34,176,	0,2872	-1.48	-1.87	-2.09
1	111477768	111478512	ENSG00000143110	1.1e-12	+	111477768	111478512	0	2	7,530,	0,214	-25.9	-27.5	-2.08
1	24666780	24669547	ENSG00000133226	5.6e-09	+	24666780	24669547	0	2	145,425,	0,2342	-17.7	-19	-2.07
1	211313483	211313903	ENSG00000117625	9.2e-08	+	211313483	211313903	0	1	420,	0	-15	-16.2	-2.05
1	156076492	156076822	ENSG00000254726	0.17	-	156076492	156076822	0	1	330,	0	-1.38	-1.76	-2.05
1	202941120	202941420	ENSG00000159346	1.2e-19	-	202941120	202941420	0	1	300,	0	-41.7	-43.6	-2.04
1	28334542	28334958	ENSG00000130772	0.0029	+	28334542	28334958	0	1	416,	0	-5.09	-5.86	-2.03
1	155659707	155659798	ENSG00000246203	0.0019	-	155659707	155659798	0	1	91,	0	-5.49	-6.27	-2.03
1	228103825	228104185	ENSG00000143793	0.18	-	228103825	228104185	0	1	360,	0	-1.32	-1.69	-2.02
1	156724149	156724592	ENSG00000143319	0.00013	-	156724149	156724592	0	2	199,130,	0,313	-7.99	-8.93	-2.01
1	42775295	42775595	ENSG00000283580	2.8e-05	+	42775295	42775595	0	1	300,	0	-9.51	-10.5	-2
1	45002539	45002839	ENSG00000126107	1.9e-08	-	45002539	45002839	0	1	300,	0	-16.6	-17.8	-2
1	42775301	42775601	ENSG00000164008	2.8e-05	+	42775301	42775601	0	1	300,	0	-9.45	-10.5	-1.99
1	232983521	232983882	ENSG00000135778	0.025	+	232983521	232983882	0	1	361,	0	-3.09	-3.68	-1.98
1	93338973	93339154	ENSG00000223745	0.023	-	93338973	93339154	0	1	181,	0	-3.18	-3.79	-1.98
1	23961490	23961789	ENSG00000189266	5.6e-05	+	23961490	23961789	0	1	299,	0	-8.81	-9.79	-1.97
1	206099791	206102459	ENSG00000263961	4.6e-07	+	206099791	206102459	0	3	7,62,708,	0,1344,1960	-13.5	-14.6	-1.95
1	39759636	39759877	ENSG00000116985	0.039	-	39759636	39759877	0	1	241,	0	-2.69	-3.24	-1.95
1	171796669	171796969	ENSG00000010165	1.2e-07	+	171796669	171796969	0	1	300,	0	-14.7	-15.9	-1.94
1	228650869	228651259	ENSG00000183929	0.024	+	228650869	228651259	0	1	390,	0	-3.12	-3.72	-1.93
1	43363575	43363904	ENSG00000066322	2.1e-13	-	43363575	43363904	0	1	329,	0	-27.6	-29.2	-1.93
1	9149805	9149986	ENSG00000228526	0.03	-	9149805	9149986	0	1	181,	0	-2.92	-3.5	-1.92
1	112913696	112917186	ENSG00000155380	0.00013	-	112913696	112917186	0	2	469,9,	0,3481	-8.03	-8.97	-1.91
1	200407565	200407745	ENSG00000162702	0.14	-	200407565	200407745	0	1	180,	0	-1.54	-1.94	-1.91
1	230706199	230710351	ENSG00000135744	0.00013	-	230706199	230710351	0	2	1,357,	0,3795	-8.02	-8.96	-1.91
1	179863680	179863890	ENSG00000169905	0.041	-	179863680	179863890	0	1	210,	0	-2.65	-3.2	-1.9
1	45605010	45607925	ENSG00000132780	3.8e-09	+	45605010	45607925	0	3	6,199,605,	0,1471,2310	-18.1	-19.4	-1.88
1	66984572	66984873	ENSG00000198160	0.11	+	66984572	66984873	0	1	301,	0	-1.74	-2.18	-1.88
1	156285430	156285610	ENSG00000163472	0.12	+	156285430	156285610	0	1	180,	0	-1.68	-2.11	-1.88
1	186323813	186325642	ENSG00000047410	5.4e-05	-	186323813	186325642	0	2	57,124,	0,1705	-8.85	-9.83	-1.88
1	27843269	27850477	ENSG00000117751	1.1e-10	+	27843269	27850477	0	3	61,65,385,	0,3758,6823	-21.5	-22.9	-1.87
1	51270081	51271374	ENSG00000123091	0.015	+	51270081	51271374	0	2	44,224,	0,1069	-3.54	-4.18	-1.87
1	180111222	180111432	ENSG00000135837	0.18	+	180111222	180111432	0	1	210,	0	-1.35	-1.72	-1.86
1	151340639	151340700	ENSG00000143390	0.033	-	151340639	151340700	0	1	61,	0	-2.85	-3.42	-1.86
1	248847452	248847692	ENSG00000171161	0.038	+	248847452	248847692	0	1	240,	0	-2.73	-3.28	-1.84
1	28280913	28281003	ENSG00000130766	0.12	+	28280913	28281003	0	1	90,	0	-1.71	-2.14	-1.83
1	209778066	209778439	ENSG00000009790	0.034	+	209778066	209778439	0	2	107,73,	0,300	-2.81	-3.37	-1.83
1	11106864	11107255	ENSG00000198793	1e-05	-	11106864	11107255	0	1	391,	0	-10.4	-11.5	-1.83
1	205976739	205976890	ENSG00000276600	0.18	-	205976739	205976890	0	1	151,	0	-1.35	-1.72	-1.83
1	113895017	113895198	ENSG00000134262	0.01	-	113895017	113895198	0	1	181,	0	-3.88	-4.56	-1.82
1	226146675	226154658	ENSG00000182827	0.029	-	226146675	226154658	0	3	146,285,17,	0,5659,7966	-2.95	-3.53	-1.81
1	25859846	25863069	ENSG00000236528	0.13	+	25859846	25863069	0	2	29,235,	0,2988	-1.63	-2.05	-1.8
1	41510588	41510888	ENSG00000127124	0.13	-	41510588	41510888	0	1	300,	0	-1.64	-2.06	-1.8
1	85252531	85252682	ENSG00000162642	0.0065	-	85252531	85252682	0	1	151,	0	-4.33	-5.03	-1.8
1	43450438	43451189	ENSG00000198198	3.4e-08	+	43450438	43451189	0	1	751,	0	-15.9	-17.2	-1.79
1	43451002	43451182	ENSG00000178922	0.028	-	43451002	43451182	0	1	180,	0	-3.01	-3.59	-1.79
1	150471628	150472497	ENSG00000163125	0.00083	+	150471628	150472497	0	1	869,	0	-6.26	-7.09	-1.78
1	236551482	236551692	ENSG00000116977	0.00047	+	236551482	236551692	0	1	210,	0	-6.8	-7.66	-1.78
1	153951387	153951716	ENSG00000160741	5.1e-08	-	153951387	153951716	0	1	329,	0	-15.6	-16.8	-1.76
1	6593083	6593592	ENSG00000162413	0.005	-	6593083	6593592	0	1	509,	0	-4.57	-5.29	-1.75
1	161121893	161122518	ENSG00000158796	1.4e-15	-	161121893	161122518	0	1	625,	0	-32.5	-34.2	-1.75
1	192578865	192579971	ENSG00000090104	7.2e-05	+	192578865	192579971	0	2	90,835,	0,271	-8.58	-9.54	-1.74
1	44221608	44230435	ENSG00000117419	0.057	-	44221608	44230435	0	2	32,119,	0,8708	-2.36	-2.87	-1.74
1	91524060	91524389	ENSG00000097046	0.0043	+	91524060	91524389	0	1	329,	0	-4.71	-5.45	-1.72
1	201878965	201879385	ENSG00000198700	0.12	+	201878965	201879385	0	1	420,	0	-1.73	-2.16	-1.71
1	6224395	6225084	ENSG00000116237	4.7e-05	-	6224395	6225084	0	1	689,	0	-8.98	-9.96	-1.71
1	36093306	36093872	ENSG00000116863	2.5e-08	+	36093306	36093872	0	1	566,	0	-16.3	-17.5	-1.7
1	171557406	171558096	ENSG00000117523	1.7e-08	+	171557406	171558096	0	1	690,	0	-16.6	-17.9	-1.7
1	248849456	248849517	ENSG00000171161	0.13	+	248849456	248849517	0	1	61,	0	-1.64	-2.06	-1.7
1	224192363	224192812	ENSG00000143753	1.4e-09	+	224192363	224192812	0	1	449,	0	-19.1	-20.4	-1.69
1	149925966	149926420	ENSG00000143368	4.6e-07	-	149925966	149926420	0	2	76,45,	0,409	-13.4	-14.6	-1.69
1	235810069	235810370	ENSG00000143669	0.051	-	235810069	235810370	0	1	301,	0	-2.45	-2.97	-1.68
1	52656881	52659426	ENSG00000182183	0.038	+	52656881	52659426	0	2	184,26,	0,2519	-2.71	-3.27	-1.67
1	25832192	25832522	ENSG00000117640	1.4e-08	+	25832192	25832522	0	1	330,	0	-16.8	-18.1	-1.66
1	43930954	43931165	ENSG00000126091	8.3e-08	+	43930954	43931165	0	1	211,	0	-15	-16.3	-1.66
1	161518135	161518285	ENSG00000143226	0.0078	+	161518135	161518285	0	1	150,	0	-4.16	-4.86	-1.66
1	27409811	27410111	ENSG00000158195	0.0087	-	27409811	27410111	0	1	300,	0	-4.06	-4.75	-1.66
1	28603096	28603546	ENSG00000120656	1.3e-11	-	28603096	28603546	0	1	450,	0	-23.7	-25.1	-1.66
1	55066358	55066808	ENSG00000162402	2e-05	-	55066358	55066808	0	1	450,	0	-9.78	-10.8	-1.66
1	77941964	77942816	ENSG00000162614	0.085	+	77941964	77942816	0	2	244,356,	0,496	-1.99	-2.46	-1.64
1	11922684	11922864	ENSG00000116685	5.4e-05	-	11922684	11922864	0	1	180,	0	-8.86	-9.83	-1.64
1	1544862	1545073	ENSG00000160075	0.0016	-	1544862	1545073	0	1	211,	0	-5.66	-6.46	-1.63
1	167541381	167541501	ENSG00000143162	1.7e-10	-	167541381	167541501	0	1	120,	0	-21.1	-22.5	-1.63
1	150648323	150648654	ENSG00000143457	0.16	-	150648323	150648654	0	1	331,	0	-1.42	-1.81	-1.62
1	151428155	151428335	ENSG00000143442	0.15	-	151428155	151428335	0	1	180,	0	-1.52	-1.92	-1.62
1	160678805	160678895	ENSG00000117091	0.12	-	160678805	160678895	0	1	90,	0	-1.71	-2.14	-1.62
1	204410446	204410895	ENSG00000158615	0.013	-	204410446	204410895	0	1	449,	0	-3.66	-4.31	-1.62
1	47432132	47432611	ENSG00000237424	0.008	-	47432132	47432611	0	1	479,	0	-4.14	-4.83	-1.61
1	219988657	219997027	ENSG00000136628	0.00031	-	219988657	219997027	0	2	166,45,	0,8325	-7.18	-8.07	-1.61
1	28281062	28281241	ENSG00000130766	0.089	+	28281062	28281241	0	1	179,	0	-1.96	-2.42	-1.59
1	28714120	28714898	ENSG00000162419	0.0066	+	28714120	28714898	0	1	778,	0	-4.32	-5.02	-1.59
1	32171033	32171333	ENSG00000025800	0.075	+	32171033	32171333	0	1	300,	0	-2.11	-2.59	-1.59
1	222665349	222665828	ENSG00000154305	3.8e-15	+	222665349	222665828	0	1	479,	0	-31.5	-33.2	-1.59
1	27404225	27404375	ENSG00000158195	1.1e-05	-	27404225	27404375	0	1	150,	0	-10.3	-11.4	-1.59
1	46361980	46362100	ENSG00000117481	0.017	+	46361980	46362100	0	1	120,	0	-3.46	-4.09	-1.58
1	43704376	43707105	ENSG00000236200	1.5e-05	-	43704376	43707105	0	2	370,47,	0,2682	-10.1	-11.1	-1.56
1	219997265	220007315	ENSG00000136628	0.00017	-	219997265	220007315	0	5	77,118,113,208,114,	0,3872,7982,8840,9936	-7.78	-8.7	-1.56
1	28510712	28510892	ENSG00000242125	0.022	+	28510712	28510892	0	1	180,	0	-3.22	-3.83	-1.55
1	173857697	173857908	ENSG00000117593	4.5e-05	+	173857697	173857908	0	1	211,	0	-9.04	-10	-1.55
1	154549953	154551238	ENSG00000160714	4.1e-40	-	154549953	154551238	0	3	516,67,16,	0,984,1269	-88.3	-90.7	-1.55
1	179865268	179865748	ENSG00000169905	0.093	-	179865268	179865748	0	1	480,	0	-1.92	-2.38	-1.54
1	43916671	43916971	ENSG00000126091	0.0057	+	43916671	43916971	0	1	300,	0	-4.46	-5.17	-1.52
1	151315590	151316040	ENSG00000143393	0.0046	-	151315590	151316040	0	1	450,	0	-4.65	-5.38	-1.52
1	43704378	43704768	ENSG00000066135	1.4e-05	+	43704378	43704768	0	1	390,	0	-10.2	-11.2	-1.51
1	203178930	203179170	ENSG00000133048	3.9e-97	-	203178930	203179170	0	1	240,	0	-219	-222	-1.51
1	15940309	15940400	ENSG00000065526	0.013	+	15940309	15940400	0	1	91,	0	-3.71	-4.37	-1.49
1	26255441	26255861	ENSG00000130695	0.035	+	26255441	26255861	0	1	420,	0	-2.78	-3.35	-1.48
1	203853649	203854100	ENSG00000058673	2.3e-16	+	203853649	203854100	0	1	451,	0	-34.3	-36	-1.48
1	203853651	203854101	ENSG00000257315	1.9e-16	+	203853651	203854101	0	1	450,	0	-34.5	-36.2	-1.48
1	25863336	25863667	ENSG00000182749	0.07	-	25863336	25863667	0	1	331,	0	-2.16	-2.66	-1.48
1	161158526	161158856	ENSG00000143222	4.6e-48	+	161158526	161158856	0	1	330,	0	-106	-109	-1.46
1	171532397	171536164	ENSG00000117523	1.2e-08	+	171532397	171536164	0	3	564,170,136,	0,3030,3631	-17	-18.2	-1.46
1	9150404	9150913	ENSG00000228526	0.0072	-	9150404	9150913	0	1	509,	0	-4.24	-4.94	-1.46
1	10456521	10456762	ENSG00000160049	0.012	-	10456521	10456762	0	1	241,	0	-3.77	-4.44	-1.46
1	40300486	40301085	ENSG00000049089	1.7e-42	-	40300486	40301085	0	1	599,	0	-93.8	-96.2	-1.46
1	209782876	209783175	ENSG00000162757	0.11	-	209782876	209783175	0	1	299,	0	-1.76	-2.2	-1.46
1	25498264	25498474	ENSG00000204178	0.038	+	25498264	25498474	0	1	210,	0	-2.73	-3.28	-1.45
1	26779200	26781030	ENSG00000117713	7.7e-17	+	26779200	26781030	0	1	1830,	0	-35.4	-37.1	-1.45
1	145978278	145978848	ENSG00000121851	8.3e-07	+	145978278	145978848	0	1	570,	0	-12.9	-14	-1.44
1	168045036	168063806	ENSG00000143164	0.00028	+	168045036	168063806	0	3	191,42,186,	0,5855,18584	-7.27	-8.17	-1.44
1	155260535	155261371	ENSG00000116521	0.00064	-	155260535	155261371	0	2	124,145,	0,691	-6.51	-7.36	-1.43
1	103533808	103534845	ENSG00000185946	0.13	+	103533808	103534845	0	2	49,72,	0,965	-1.64	-2.06	-1.42
1	154465207	154465925	ENSG00000160712	0.0017	+	154465207	154465925	0	1	718,	0	-5.57	-6.36	-1.42
1	1598011	1598429	ENSG00000228594	2.5e-06	-	1598011	1598429	0	1	418,	0	-11.8	-12.9	-1.42
1	203305730	203307355	ENSG00000159388	0.071	+	203305730	203307355	0	2	18,252,	0,1373	-2.16	-2.65	-1.41
1	42926659	42927079	ENSG00000117394	0.00082	-	42926659	42927079	0	1	420,	0	-6.27	-7.11	-1.41
1	145746706	145748003	ENSG00000265491	0.032	-	145746706	145748003	0	2	291,9,	0,1288	-2.88	-3.45	-1.41
1	205977997	205978657	ENSG00000276600	0.00054	-	205977997	205978657	0	1	660,	0	-6.67	-7.52	-1.41
1	156782288	156787107	ENSG00000143294	9.3e-12	+	156782288	156787107	0	2	41,500,	0,4319	-24	-25.4	-1.4
1	235759275	235762756	ENSG00000143669	0.00032	-	235759275	235762756	0	2	324,37,	0,3444	-7.16	-8.05	-1.4
1	206464052	206464413	ENSG00000266028	0.0087	+	206464052	206464413	0	1	361,	0	-4.06	-4.74	-1.39
1	25862827	25863068	ENSG00000182749	0.17	-	25862827	25863068	0	1	241,	0	-1.41	-1.79	-1.39
1	36136838	36137257	ENSG00000054116	1.7e-11	-	36136838	36137257	0	1	419,	0	-23.3	-24.8	-1.39
1	155926734	155929318	ENSG00000132680	0.011	-	155926734	155929318	0	3	105,53,23,	0,369,2561	-3.86	-4.53	-1.39
1	150959318	150961407	ENSG00000143379	1.7e-07	+	150959318	150961407	0	3	29,629,91,	0,1244,1998	-14.4	-15.6	-1.38
1	1082117	1082837	ENSG00000131591	5.9e-05	-	1082117	1082837	0	1	720,	0	-8.75	-9.73	-1.38
1	23759573	23759933	ENSG00000011007	0.012	+	23759573	23759933	0	1	360,	0	-3.78	-4.44	-1.37
1	26731231	26732693	ENSG00000117713	0.077	+	26731231	26732693	0	2	373,18,	0,1444	-2.07	-2.56	-1.37
1	151401793	151401944	ENSG00000159377	0.021	+	151401793	151401944	0	1	151,	0	-3.22	-3.84	-1.37
1	161958670	161959091	ENSG00000118217	0.0018	+	161958670	161959091	0	1	421,	0	-5.52	-6.31	-1.37
1	26469019	26469230	ENSG00000117682	0.11	+	26469019	26469230	0	1	211,	0	-1.74	-2.18	-1.36
1	89933646	89934156	ENSG00000171492	0.0016	+	89933646	89934156	0	1	510,	0	-5.64	-6.44	-1.36
1	109592168	109592798	ENSG00000065135	0.00011	+	109592168	109592798	0	2	87,454,	0,176	-8.17	-9.11	-1.36
1	201876091	201876960	ENSG00000198700	6.3e-17	+	201876091	201876960	0	1	869,	0	-35.5	-37.3	-1.36
1	150730195	150730406	ENSG00000163131	0.00016	-	150730195	150730406	0	1	211,	0	-7.84	-8.76	-1.35
1	151874031	151874569	ENSG00000159445	5.6e-07	-	151874031	151874569	0	1	538,	0	-13.3	-14.4	-1.35
1	77933206	77936029	ENSG00000162614	0.083	+	77933206	77936029	0	2	273,207,	0,2616	-2.01	-2.49	-1.34
1	156736750	156736960	ENSG00000143303	0.00035	+	156736750	156736960	0	1	210,	0	-7.06	-7.95	-1.34
1	34855385	34855835	ENSG00000163866	2.8e-06	-	34855385	34855835	0	1	450,	0	-11.7	-12.8	-1.34
1	20941594	20941895	ENSG00000075151	0.053	-	20941594	20941895	0	1	301,	0	-2.41	-2.93	-1.33
1	28571260	28577797	ENSG00000180098	0.0017	+	28571260	28577797	0	4	78,34,130,298,	0,606,3328,6239	-5.59	-6.39	-1.32
1	52417605	52418265	ENSG00000134748	0.00037	+	52417605	52418265	0	1	660,	0	-7.02	-7.9	-1.32
1	207331258	207336895	ENSG00000196352	0.016	+	207331258	207336895	0	2	38,203,	0,5434	-3.5	-4.14	-1.32
1	114567910	114570745	ENSG00000116752	4.7e-05	-	114567910	114570745	0	3	346,81,46,	0,2081,2789	-8.97	-9.96	-1.32
1	156177033	156177752	ENSG00000196189	3.8e-12	+	156177033	156177752	0	1	719,	0	-24.8	-26.3	-1.31
1	166854336	166854517	ENSG00000143157	0.0031	+	166854336	166854517	0	1	181,	0	-5.02	-5.78	-1.29
1	235330547	235341769	ENSG00000285053	0.051	+	235330547	235341769	0	3	55,93,62,	0,4694,11160	-2.45	-2.98	-1.29
1	25835126	25835424	ENSG00000127423	0.13	-	25835126	25835424	0	1	298,	0	-1.65	-2.06	-1.29
1	37566815	37567900	ENSG00000134697	1.9e-12	-	37566815	37567900	0	2	192,228,	0,857	-25.5	-27	-1.29
1	46676594	46676715	ENSG00000159658	0.095	-	46676594	46676715	0	1	121,	0	-1.89	-2.35	-1.29
1	155262867	155263077	ENSG00000176444	1.4e-11	-	155262867	155263077	0	1	210,	0	-23.5	-25	-1.29
1	186313785	186314144	ENSG00000116690	0.00022	+	186313785	186314144	0	1	359,	0	-7.52	-8.43	-1.28
1	235329910	235342013	ENSG00000152904	0.042	+	235329910	235342013	0	4	74,93,71,3,	0,5331,11797,12100	-2.61	-3.16	-1.28
1	11068914	11070927	ENSG00000171824	0.00094	-	11068914	11070927	0	3	10,172,28,	0,644,1985	-6.14	-6.97	-1.28
1	10419634	10419845	ENSG00000142657	6.5e-29	+	10419634	10419845	0	1	211,	0	-62.8	-64.9	-1.27
1	15935318	15935529	ENSG00000065526	0.14	+	15935318	15935529	0	1	211,	0	-1.58	-1.99	-1.27
1	183142600	183143050	ENSG00000135862	0.013	+	183142600	183143050	0	1	450,	0	-3.68	-4.33	-1.27
1	202728693	202729263	ENSG00000117139	5e-06	-	202728693	202729263	0	1	570,	0	-11.1	-12.2	-1.27
1	150346015	150346165	ENSG00000117360	0.075	+	150346015	150346165	0	1	150,	0	-2.1	-2.59	-1.26
1	23845432	23845640	ENSG00000179163	0.021	-	23845432	23845640	0	1	208,	0	-3.24	-3.85	-1.26
1	3629888	3630127	ENSG00000158109	0.026	+	3629888	3630127	0	1	239,	0	-3.06	-3.65	-1.25
1	46035824	46036124	ENSG00000086015	0.067	+	46035824	46036124	0	1	300,	0	-2.2	-2.7	-1.25
1	227780811	227781231	ENSG00000143740	0.002	+	227780811	227781231	0	1	420,	0	-5.44	-6.22	-1.25
1	229602032	229602752	ENSG00000135801	0.017	-	229602032	229602752	0	1	720,	0	-3.42	-4.05	-1.25
1	150553544	150553874	ENSG00000143382	6.8e-07	+	150553544	150553874	0	1	330,	0	-13	-14.2	-1.24
1	160358862	160358952	ENSG00000162736	0.013	+	160358862	160358952	0	1	90,	0	-3.66	-4.32	-1.24
1	36095864	36095984	ENSG00000171812	0.0058	-	36095864	36095984	0	1	120,	0	-4.43	-5.15	-1.24
1	46285665	46285876	ENSG00000132128	0.06	-	46285665	46285876	0	1	211,	0	-2.31	-2.82	-1.24
1	111117900	111118110	ENSG00000156171	6.2e-11	-	111117900	111118110	0	1	210,	0	-22.1	-23.5	-1.24
1	244056521	244056790	ENSG00000179456	0.032	+	244056521	244056790	0	1	269,	0	-2.86	-3.44	-1.23
1	10461195	10461525	ENSG00000160049	0.04	-	10461195	10461525	0	1	330,	0	-2.68	-3.23	-1.23
1	155069259	155069553	ENSG00000243364	0.15	+	155069259	155069553	0	1	294,	0	-1.53	-1.93	-1.22
1	23310394	23310873	ENSG00000125944	1.1e-07	-	23310394	23310873	0	1	479,	0	-14.7	-16	-1.22
1	206957964	206958560	ENSG00000162897	0.061	-	206957964	206958560	0	1	596,	0	-2.29	-2.79	-1.21
1	109237838	109238169	ENSG00000031698	5.7e-15	+	109237838	109238169	0	1	331,	0	-31.1	-32.8	-1.2
1	206463423	206463694	ENSG00000266028	0.025	+	206463423	206463694	0	1	271,	0	-3.1	-3.7	-1.2
1	230279612	230279972	ENSG00000143641	0.16	+	230279612	230279972	0	1	360,	0	-1.43	-1.81	-1.2
1	77948615	77948885	ENSG00000162613	0.00095	-	77948615	77948885	0	1	270,	0	-6.13	-6.96	-1.2
1	77964903	77965184	ENSG00000162613	0.024	-	77964903	77965184	0	2	65,116,	0,165	-3.11	-3.71	-1.2
1	151403951	151404131	ENSG00000143442	0.074	-	151403951	151404131	0	1	180,	0	-2.11	-2.6	-1.2
1	6101012	6101193	ENSG00000069424	6.9e-13	+	6101012	6101193	0	1	181,	0	-26.5	-28	-1.19
1	232807393	232808228	ENSG00000212916	0.012	+	232807393	232808228	0	1	835,	0	-3.73	-4.4	-1.19
1	1630429	1630610	ENSG00000197530	0.004	+	1630429	1630610	0	1	181,	0	-4.79	-5.53	-1.18
1	246647465	246647945	ENSG00000162852	0.1	+	246647465	246647945	0	1	480,	0	-1.81	-2.26	-1.18
1	151402753	151403023	ENSG00000143442	0.021	-	151402753	151403023	0	1	270,	0	-3.25	-3.87	-1.18
1	151982914	151983004	ENSG00000197747	0.0012	-	151982914	151983004	0	1	90,	0	-5.88	-6.69	-1.18
1	202880815	202881086	ENSG00000183155	0.0095	-	202880815	202881086	0	1	271,	0	-3.98	-4.66	-1.18
1	212738316	212739582	ENSG00000117697	6.8e-05	-	212738316	212739582	0	2	370,49,	0,1217	-8.64	-9.6	-1.18
1	223795856	223798230	ENSG00000143514	0.0013	-	223795856	223798230	0	2	734,16,	0,2358	-5.83	-6.64	-1.18
1	154992960	154993111	ENSG00000160688	0.0042	+	154992960	154993111	0	1	151,	0	-4.73	-5.47	-1.17
1	39758618	39758799	ENSG00000116985	0.18	-	39758618	39758799	0	1	181,	0	-1.34	-1.71	-1.17
1	52685349	52685619	ENSG00000162377	0.16	-	52685349	52685619	0	1	270,	0	-1.45	-1.84	-1.17
1	155913042	155913403	ENSG00000132680	2.5e-05	-	155913042	155913403	0	1	361,	0	-9.55	-10.6	-1.17
1	12011566	12011986	ENSG00000116688	0.00046	+	12011566	12011986	0	1	420,	0	-6.82	-7.69	-1.16
1	183553079	183553230	ENSG00000116698	0.13	+	183553079	183553230	0	1	151,	0	-1.64	-2.05	-1.16
1	227732281	227732402	ENSG00000081692	0.13	-	227732281	227732402	0	1	121,	0	-1.6	-2.02	-1.16
1	25566966	25567687	ENSG00000157978	0.004	+	25566966	25567687	0	1	721,	0	-4.78	-5.53	-1.15
1	46035135	46035675	ENSG00000086015	0.029	+	46035135	46035675	0	1	540,	0	-2.96	-3.54	-1.15
1	20744184	20744723	ENSG00000127483	8.4e-09	-	20744184	20744723	0	1	539,	0	-17.3	-18.6	-1.15
1	110947932	110949982	ENSG00000121931	0.0015	-	110947932	110949982	0	2	467,132,	0,1918	-5.68	-6.48	-1.15
1	114774115	114776388	ENSG00000052723	0.16	-	114774115	114776388	0	2	257,43,	0,2230	-1.46	-1.85	-1.15
1	204549361	204549812	ENSG00000198625	0.038	+	204549361	204549812	0	1	451,	0	-2.73	-3.28	-1.14
1	19682629	19683047	ENSG00000162542	0.12	-	19682629	19683047	0	1	418,	0	-1.66	-2.08	-1.14
1	16985987	16986167	ENSG00000159363	0.15	-	16985987	16986167	0	1	180,	0	-1.49	-1.89	-1.13
1	45327022	45327231	ENSG00000186603	0.091	+	45327022	45327231	0	1	209,	0	-1.94	-2.4	-1.12
1	151117469	151118539	ENSG00000143458	0.12	+	151117469	151118539	0	2	47,583,	0,487	-1.7	-2.13	-1.12
1	161219090	161220407	ENSG00000158869	0.0014	+	161219090	161220407	0	2	158,18,	0,1299	-5.76	-6.57	-1.11
1	179917751	179918441	ENSG00000143337	0.0018	+	179917751	179918441	0	1	690,	0	-5.55	-6.34	-1.11
1	212100687	212102924	ENSG00000143476	0.014	+	212100687	212102924	0	2	397,83,	0,2154	-3.65	-4.3	-1.11
1	36468459	36468880	ENSG00000119535	0.099	-	36468459	36468880	0	1	421,	0	-1.85	-2.31	-1.11
1	212726391	212726750	ENSG00000117697	0.17	-	212726391	212726750	0	1	359,	0	-1.4	-1.78	-1.11
1	6589040	6589280	ENSG00000204859	0.00084	+	6589040	6589280	0	1	240,	0	-6.25	-7.08	-1.1
1	43913804	43914284	ENSG00000126091	0.067	+	43913804	43914284	0	1	480,	0	-2.2	-2.7	-1.1
1	101086879	101087268	ENSG00000233184	0.07	+	101086879	101087268	0	1	389,	0	-2.16	-2.66	-1.1
1	166852539	166853079	ENSG00000143157	0.015	+	166852539	166853079	0	1	540,	0	-3.56	-4.2	-1.1
1	192811444	192811924	ENSG00000116741	0.067	+	192811444	192811924	0	1	480,	0	-2.21	-2.71	-1.1
1	154601045	154602272	ENSG00000160710	0.0085	-	154601045	154602272	0	1	1227,	0	-4.08	-4.77	-1.1
1	156723086	156723970	ENSG00000143319	0.0034	-	156723086	156723970	0	2	376,13,	0,871	-4.94	-5.69	-1.1
1	155188008	155188765	ENSG00000185499	0.00041	-	155188008	155188765	0	2	55,603,	0,154	-6.92	-7.79	-1.09
1	13782390	13786583	ENSG00000116731	0.13	+	13782390	13786583	0	2	441,69,	0,4124	-1.6	-2.01	-1.08
1	52086570	52087061	ENSG00000134717	0.0014	+	52086570	52087061	0	2	40,350,	0,141	-5.74	-6.55	-1.08
1	171591230	171592073	ENSG00000117523	5.6e-07	+	171591230	171592073	0	2	83,487,	0,356	-13.2	-14.4	-1.08
1	181055376	181056006	ENSG00000153029	0.02	+	181055376	181056006	0	1	630,	0	-3.3	-3.92	-1.08
1	203840329	203850221	ENSG00000058673	6.1e-06	+	203840329	203850221	0	5	45,504,77,316,48,	0,6854,8001,9381,9844	-10.9	-12	-1.08
1	33007939	33008510	ENSG00000004455	0.00066	-	33007939	33008510	0	1	571,	0	-6.48	-7.32	-1.08
1	151052972	151054234	ENSG00000197622	2e-06	-	151052972	151054234	0	2	355,4,	0,1258	-11.9	-13.1	-1.08
1	19682212	19682451	ENSG00000162542	0.13	-	19682212	19682451	0	1	239,	0	-1.61	-2.02	-1.07
1	21678926	21679287	ENSG00000090686	0.004	-	21678926	21679287	0	1	361,	0	-4.77	-5.51	-1.07
1	23873689	23874496	ENSG00000188822	0.094	-	23873689	23874496	0	1	807,	0	-1.9	-2.36	-1.07
1	150960582	150963729	ENSG00000143418	0.0003	-	150960582	150963729	0	3	173,187,60,	0,2375,3087	-7.21	-8.1	-1.07
1	155946850	155946941	ENSG00000116584	1e-05	-	155946850	155946941	0	1	91,	0	-10.4	-11.5	-1.07
1	197090324	197091951	ENSG00000066279	0.095	-	197090324	197091951	0	3	64,192,45,	0,525,1582	-1.9	-2.35	-1.07
1	93870974	93873320	ENSG00000067334	0.024	-	93870974	93873320	0	3	23,165,202,	0,1097,2144	-3.14	-3.74	-1.06
1	93136801	93137072	ENSG00000143033	0.071	+	93136801	93137072	0	1	271,	0	-2.15	-2.64	-1.05
1	158843312	158849297	ENSG00000163563	6.6e-05	+	158843312	158849297	0	5	103,168,417,189,108,	0,642,2274,4415,5877	-8.67	-9.63	-1.05
1	183630517	183630758	ENSG00000162704	0.0038	-	183630517	183630758	0	1	241,	0	-4.83	-5.57	-1.05
1	26281327	26281568	ENSG00000158062	2.1e-16	-	26281327	26281568	0	1	241,	0	-34.4	-36.1	-1.04
1	37802973	37803423	ENSG00000196449	0.016	-	37802973	37803423	0	1	450,	0	-3.48	-4.12	-1.04
1	220020168	220024278	ENSG00000136628	0.19	-	220020168	220024278	0	3	53,172,15,	0,2178,4095	-1.3	-1.67	-1.04
1	39808143	39809125	ENSG00000284719	0.12	+	39808143	39809125	0	2	55,64,	0,918	-1.68	-2.1	-1.03
1	52032102	52032694	ENSG00000198841	0.0018	-	52032102	52032694	0	1	592,	0	-5.53	-6.32	-1.03
1	154584688	154584928	ENSG00000160710	0.044	-	154584688	154584928	0	1	240,	0	-2.59	-3.13	-1.03
1	244854295	244854626	ENSG00000153187	5.7e-15	-	244854295	244854626	0	1	331,	0	-31.2	-32.8	-1.03
1	27885998	27886685	ENSG00000130775	0.00024	+	27885998	27886685	0	1	687,	0	-7.45	-8.35	-1.02
1	108699164	108700154	ENSG00000134186	1.1e-11	+	108699164	108700154	0	1	990,	0	-23.7	-25.2	-1.02
1	31630366	31630574	ENSG00000162517	0.032	-	31630366	31630574	0	1	208,	0	-2.88	-3.45	-1.02
1	246541065	246541186	ENSG00000162851	0.056	-	246541065	246541186	0	1	121,	0	-2.37	-2.89	-1.02
1	158184391	158184896	ENSG00000158473	0.0086	+	158184391	158184896	0	1	505,	0	-4.07	-4.76	-1.01
1	53767698	53767967	ENSG00000058804	0.085	-	53767698	53767967	0	1	269,	0	-2	-2.47	-1.01
1	200406938	200407387	ENSG00000162702	0.15	-	200406938	200407387	0	1	449,	0	-1.53	-1.93	-1.01
1	26281015	26281522	ENSG00000142669	7e-56	+	26281015	26281522	0	1	507,	0	-125	-127	-1
1	62450372	62450880	ENSG00000162607	0.037	+	62450372	62450880	0	1	508,	0	-2.75	-3.31	-1
1	150962881	150963211	ENSG00000143379	0.012	+	150962881	150963211	0	1	330,	0	-3.76	-4.43	-0.99
1	247189850	247190901	ENSG00000227671	1.1e-19	-	247189850	247190901	0	1	1051,	0	-41.8	-43.7	-0.989
1	155014919	155017058	ENSG00000160685	5.6e-10	+	155014919	155017058	0	2	895,839,	0,1300	-19.9	-21.3	-0.986
1	43930205	43930686	ENSG00000126091	0.0044	+	43930205	43930686	0	1	481,	0	-4.7	-5.43	-0.982
1	204405984	204409850	ENSG00000158615	0.02	-	204405984	204409850	0	2	329,359,	0,3507	-3.28	-3.89	-0.978
1	160358355	160358684	ENSG00000162736	1.4e-15	+	160358355	160358684	0	1	329,	0	-32.5	-34.2	-0.977
1	205663040	205663400	ENSG00000158715	0.11	-	205663040	205663400	0	1	360,	0	-1.8	-2.25	-0.977
1	154275724	154275875	ENSG00000143575	1.9e-11	+	154275724	154275875	0	1	151,	0	-23.2	-24.7	-0.976
1	156797214	156800787	ENSG00000143294	3.4e-07	+	156797214	156800787	0	2	127,414,	0,3159	-13.7	-14.9	-0.973
1	231018957	231019197	ENSG00000182118	0.13	-	231018957	231019197	0	1	240,	0	-1.62	-2.04	-0.969
1	153661206	153661593	ENSG00000143553	0.00059	+	153661206	153661593	0	1	387,	0	-6.59	-7.44	-0.968
1	43930206	43930685	ENSG00000284989	0.005	+	43930206	43930685	0	1	479,	0	-4.57	-5.29	-0.962
1	203838053	203852156	ENSG00000257315	1e-06	+	203838053	203852156	0	8	11,69,504,77,316,167,68,16,	0,2252,9130,10277,11657,12461,13003,14087	-12.6	-13.8	-0.962
1	36289229	36289650	ENSG00000054118	0.049	+	36289229	36289650	0	1	421,	0	-2.49	-3.02	-0.96
1	32936564	32937285	ENSG00000116514	0.051	-	32936564	32937285	0	1	721,	0	-2.44	-2.97	-0.96
1	19219020	19219321	ENSG00000127463	0.017	-	19219020	19219321	0	1	301,	0	-3.43	-4.06	-0.958
1	246665712	246666132	ENSG00000162852	0.19	+	246665712	246666132	0	1	420,	0	-1.31	-1.68	-0.957
1	156468218	156468939	ENSG00000116604	1.3e-12	-	156468218	156468939	0	2	81,160,	0,561	-25.9	-27.4	-0.957
1	179095115	179095654	ENSG00000186283	3.4e-05	+	179095115	179095654	0	1	539,	0	-9.3	-10.3	-0.953
1	150576885	150578536	ENSG00000143384	8.3e-06	-	150576885	150578536	0	2	606,293,	0,1358	-10.6	-11.7	-0.943
1	236549004	236549305	ENSG00000119285	0.051	-	236549004	236549305	0	1	301,	0	-2.45	-2.97	-0.939
1	45015364	45015575	ENSG00000126088	0.0092	+	45015364	45015575	0	1	211,	0	-4	-4.69	-0.938
1	200644330	200648492	ENSG00000118197	0.087	-	200644330	200648492	0	2	187,54,	0,4108	-1.98	-2.44	-0.937
1	235441750	235442960	ENSG00000284770	0.066	+	235441750	235442960	0	2	132,109,	0,1101	-2.22	-2.72	-0.928
1	211312730	211312911	ENSG00000117625	0.073	+	211312730	211312911	0	1	181,	0	-2.13	-2.62	-0.921
1	172441464	172441704	ENSG00000135845	0.038	-	172441464	172441704	0	1	240,	0	-2.71	-3.26	-0.921
1	173800208	173803371	ENSG00000120334	0.12	-	173800208	173803371	0	2	311,409,	0,2754	-1.71	-2.13	-0.921
1	108932347	108937233	ENSG00000121940	0.078	-	108932347	108937233	0	3	154,318,157,	0,2277,4729	-2.07	-2.55	-0.919
1	184794938	184795806	ENSG00000135842	0.035	-	184794938	184795806	0	1	868,	0	-2.77	-3.34	-0.916
1	217611028	217620307	ENSG00000092978	0.14	-	217611028	217620307	0	3	43,62,525,	0,3112,8754	-1.57	-1.98	-0.916
1	111765889	111767327	ENSG00000064703	0.00097	+	111765889	111767327	0	1	1438,	0	-6.11	-6.94	-0.915
1	223780048	223784197	ENSG00000143514	0.0014	-	223780048	223784197	0	2	846,83,	0,4066	-5.74	-6.54	-0.914
1	20807011	20807341	ENSG00000075151	0.0029	-	20807011	20807341	0	1	330,	0	-5.09	-5.86	-0.912
1	52474833	52475523	ENSG00000134744	0.16	-	52474833	52475523	0	1	690,	0	-1.47	-1.86	-0.909
1	206454175	206454685	ENSG00000266028	0.0099	+	206454175	206454685	0	1	510,	0	-3.94	-4.62	-0.907
1	43384718	43384897	ENSG00000159479	0.15	-	43384718	43384897	0	1	179,	0	-1.51	-1.91	-0.901
1	43986180	43990751	ENSG00000117411	0.00062	+	43986180	43990751	0	2	26,454,	0,4117	-6.53	-7.38	-0.899
1	172441456	172441696	ENSG00000135845	0.05	-	172441456	172441696	0	1	240,	0	-2.46	-2.99	-0.899
1	15725452	15728093	ENSG00000116786	0.013	+	15725452	15728093	0	3	93,819,15,	0,1561,2626	-3.67	-4.33	-0.897
1	21715403	21721675	ENSG00000090686	0.06	-	21715403	21721675	0	3	54,131,26,	0,5632,6246	-2.3	-2.81	-0.895
1	160211300	160213526	ENSG00000162734	1.4e-06	+	160211300	160213526	0	4	14,174,156,105,	0,242,1809,2121	-12.3	-13.5	-0.892
1	52687446	52692784	ENSG00000162377	0.011	-	52687446	52692784	0	2	722,58,	0,5280	-3.87	-4.54	-0.887
1	247424095	247424455	ENSG00000162711	0.14	+	247424095	247424455	0	1	360,	0	-1.57	-1.97	-0.885
1	231276191	231277853	ENSG00000116906	3.4e-05	+	231276191	231277853	0	2	5,355,	0,1307	-9.28	-10.3	-0.878
1	100990402	100995137	ENSG00000117543	0.0052	-	100990402	100995137	0	3	229,104,28,	0,2234,4707	-4.52	-5.25	-0.878
1	2307692	2308472	ENSG00000157933	0.022	+	2307692	2308472	0	1	780,	0	-3.2	-3.81	-0.873
1	28743217	28769177	ENSG00000198492	0.00054	+	28743217	28769177	0	2	769,249,	0,25711	-6.67	-7.52	-0.869
1	151286970	151287540	ENSG00000143373	0.17	+	151286970	151287540	0	1	570,	0	-1.41	-1.79	-0.869
1	25456805	25485764	ENSG00000204178	0.091	+	25456805	25485764	0	4	26,502,159,152,	0,1585,27310,28807	-1.94	-2.4	-0.862
1	15939531	15940250	ENSG00000065526	0.00026	+	15939531	15940250	0	1	719,	0	-7.36	-8.26	-0.859
1	150349132	150353195	ENSG00000117360	0.00053	+	150349132	150353195	0	2	86,363,	0,3700	-6.69	-7.55	-0.855
1	229594039	229599397	ENSG00000135801	0.0037	-	229594039	229599397	0	2	1055,204,	0,5154	-4.87	-5.61	-0.851
1	35855796	35856096	ENSG00000134698	0.078	+	35855796	35856096	0	1	300,	0	-2.07	-2.55	-0.848
1	206455943	206458395	ENSG00000266028	0.023	+	206455943	206458395	0	2	216,25,	0,2427	-3.18	-3.78	-0.848
1	1401907	1401998	ENSG00000242485	0.073	-	1401907	1401998	0	1	91,	0	-2.13	-2.62	-0.846
1	180094282	180095857	ENSG00000135837	0.053	+	180094282	180095857	0	3	334,52,335,	0,864,1240	-2.41	-2.93	-0.844
1	58480836	58506171	ENSG00000162600	0.038	-	58480836	58506171	0	2	338,112,	0,25223	-2.72	-3.28	-0.841
1	43936732	43937241	ENSG00000117407	2.1e-08	+	43936732	43937241	0	1	509,	0	-16.4	-17.7	-0.839
1	203175457	203175813	ENSG00000133055	0.029	-	203175457	203175813	0	2	4,263,	0,93	-2.95	-3.53	-0.837
1	24670084	24671514	ENSG00000133226	0.04	+	24670084	24671514	0	2	231,129,	0,1301	-2.66	-3.21	-0.836
1	203850430	203852152	ENSG00000058673	0.041	+	203850430	203852152	0	3	251,68,12,	0,626,1710	-2.65	-3.19	-0.836
1	209844576	209851718	ENSG00000117597	0.13	+	209844576	209851718	0	2	56,515,	0,6627	-1.61	-2.03	-0.836
1	175013315	175013882	ENSG00000120333	0.13	-	175013315	175013882	0	1	567,	0	-1.65	-2.07	-0.836
1	209779237	209779655	ENSG00000162757	0.023	-	209779237	209779655	0	1	418,	0	-3.15	-3.76	-0.831
1	70249893	70250134	ENSG00000116754	0.0071	+	70249893	70250134	0	1	241,	0	-4.25	-4.95	-0.828
1	1804562	1817737	ENSG00000078369	0.0075	-	1804562	1817737	0	4	19,64,107,51,	0,1912,11193,13124	-4.19	-4.89	-0.823
1	193020433	193027954	ENSG00000116750	0.053	-	193020433	193027954	0	5	23,99,114,103,80,	0,663,2492,3410,7441	-2.42	-2.94	-0.822
1	16395040	16395608	ENSG00000055070	6.4e-05	+	16395040	16395608	0	1	568,	0	-8.69	-9.66	-0.821
1	205619921	205620582	ENSG00000158711	0.16	-	205619921	205620582	0	1	661,	0	-1.42	-1.81	-0.82
1	12567909	12568148	ENSG00000162496	0.1	-	12567909	12568148	0	1	239,	0	-1.81	-2.26	-0.819
1	16250431	16251360	ENSG00000037637	0.00069	-	16250431	16251360	0	1	929,	0	-6.44	-7.28	-0.817
1	241593610	241594059	ENSG00000117009	3.4e-06	+	241593610	241594059	0	1	449,	0	-11.5	-12.6	-0.816
1	28538522	28539031	ENSG00000180198	1.8e-05	+	28538522	28539031	0	1	509,	0	-9.83	-10.9	-0.813
1	40515099	40516021	ENSG00000164002	0.098	+	40515099	40516021	0	1	922,	0	-1.87	-2.32	-0.81
1	27666060	27666240	ENSG00000126709	0.071	-	27666060	27666240	0	1	180,	0	-2.16	-2.65	-0.808
1	231226707	231236810	ENSG00000143633	0.14	-	231226707	231236810	0	4	118,96,60,115,	0,265,2442,9988	-1.59	-2	-0.807
1	241593612	241594063	ENSG00000054277	5e-06	-	241593612	241594063	0	1	451,	0	-11.1	-12.2	-0.806
1	151759642	151759881	ENSG00000143436	4.1e-08	-	151759642	151759881	0	1	239,	0	-15.8	-17	-0.803
1	156728710	156729519	ENSG00000143303	0.01	+	156728710	156729519	0	2	505,4,	0,805	-3.91	-4.59	-0.802
1	209779246	209779636	ENSG00000009790	0.029	+	209779246	209779636	0	1	390,	0	-2.95	-3.53	-0.801
1	31318227	31364392	ENSG00000121766	0.0064	+	31318227	31364392	0	7	9,58,101,92,179,146,361,	0,881,18947,20729,28412,30601,45804	-4.34	-5.05	-0.8
1	42746334	42746664	ENSG00000117385	0.00035	-	42746334	42746664	0	1	330,	0	-7.09	-7.97	-0.799
1	42459784	42473147	ENSG00000127125	4.6e-06	+	42459784	42473147	0	2	630,26,	0,13337	-11.2	-12.3	-0.797
1	24652557	24655104	ENSG00000133226	0.079	+	24652557	24655104	0	4	71,120,38,250,	0,355,1748,2297	-2.06	-2.54	-0.796
1	67687798	67688218	ENSG00000116717	0.035	+	67687798	67688218	0	1	420,	0	-2.8	-3.36	-0.794
1	244053868	244055479	ENSG00000179456	0.042	+	244053868	244055479	0	1	1611,	0	-2.63	-3.17	-0.79
1	29193800	29193951	ENSG00000116353	0.15	-	29193800	29193951	0	1	151,	0	-1.47	-1.87	-0.787
1	151759611	151759911	ENSG00000269621	9.2e-08	+	151759611	151759911	0	1	300,	0	-15	-16.2	-0.784
1	217431003	217449276	ENSG00000092978	0.18	-	217431003	217449276	0	2	362,28,	0,18245	-1.37	-1.74	-0.783
1	172442322	172442831	ENSG00000135845	0.016	-	172442322	172442831	0	1	509,	0	-3.51	-4.15	-0.772
1	236903501	236903981	ENSG00000116984	0.15	+	236903501	236903981	0	1	480,	0	-1.49	-1.89	-0.76
1	212364881	212365239	ENSG00000065600	7.9e-05	-	212364881	212365239	0	1	358,	0	-8.48	-9.44	-0.76
1	53851718	53851956	ENSG00000058799	0.061	-	53851718	53851956	0	1	238,	0	-2.29	-2.79	-0.758
1	172442331	172442811	ENSG00000135845	0.019	-	172442331	172442811	0	1	480,	0	-3.35	-3.97	-0.757
1	36472828	36475494	ENSG00000119535	3.8e-11	-	36472828	36475494	0	3	794,169,118,	0,890,2548	-22.6	-24	-0.736
1	167533377	167541262	ENSG00000143162	0.0019	-	167533377	167541262	0	2	20,250,	0,7635	-5.5	-6.29	-0.736
1	9726993	9727292	ENSG00000171608	0.022	+	9726993	9727292	0	1	299,	0	-3.21	-3.82	-0.735
1	11066617	11068795	ENSG00000171824	0.085	-	11066617	11068795	0	3	131,77,151,	0,1390,2027	-2	-2.47	-0.723
1	70250283	70251016	ENSG00000116754	3.8e-10	+	70250283	70251016	0	2	220,409,	0,324	-20.3	-21.7	-0.721
1	39568760	39569585	ENSG00000090621	0.051	-	39568760	39569585	0	2	179,91,	0,734	-2.45	-2.98	-0.716
1	151342257	151342798	ENSG00000143390	0.016	-	151342257	151342798	0	1	541,	0	-3.48	-4.12	-0.715
1	19339225	19339375	ENSG00000077549	5e-07	-	19339225	19339375	0	1	150,	0	-13.4	-14.5	-0.713
1	241497602	241500575	ENSG00000091483	0.0031	-	241497602	241500575	0	2	368,139,	0,2834	-5.02	-5.78	-0.71
1	52896209	52896719	ENSG00000121310	0.0068	-	52896209	52896719	0	1	510,	0	-4.28	-4.99	-0.708
1	54741760	54742388	ENSG00000243725	0.013	+	54741760	54742388	0	1	628,	0	-3.68	-4.33	-0.707
1	36392468	36397623	ENSG00000181817	1.4e-07	-	36392468	36397623	0	3	19,724,6,	0,961,5149	-14.6	-15.8	-0.707
1	247418788	247423946	ENSG00000162711	0.18	+	247418788	247423946	0	3	289,120,100,	0,4441,5058	-1.36	-1.73	-0.705
1	29148490	29150176	ENSG00000116350	0.00027	-	29148490	29150176	0	2	736,74,	0,1612	-7.31	-8.21	-0.705
1	186334351	186341514	ENSG00000047410	0.00039	-	186334351	186341514	0	9	182,62,206,199,144,211,131,132,263,	0,716,986,2144,2661,3681,5290,6676,6900	-6.98	-7.85	-0.705
1	89934484	89935892	ENSG00000171492	7.6e-09	+	89934484	89935892	0	1	1408,	0	-17.4	-18.7	-0.702
1	168198957	168200236	ENSG00000143155	0.0051	+	168198957	168200236	0	2	24,334,	0,945	-4.55	-5.28	-0.699
1	54741739	54742308	ENSG00000271723	0.013	+	54741739	54742308	0	1	569,	0	-3.68	-4.34	-0.698
1	153772989	153773341	ENSG00000143624	0.0073	+	153772989	153773341	0	2	92,149,	0,203	-4.23	-4.92	-0.698
1	6098464	6099184	ENSG00000069424	2.5e-06	+	6098464	6099184	0	1	720,	0	-11.8	-12.9	-0.696
1	156266045	156266256	ENSG00000198952	0.12	-	156266045	156266256	0	1	211,	0	-1.67	-2.1	-0.696
1	30733271	30733391	ENSG00000162511	6.6e-05	-	30733271	30733391	0	1	120,	0	-8.66	-9.62	-0.691
1	150308083	150308442	ENSG00000266472	1.3e-17	+	150308083	150308442	0	1	359,	0	-37.1	-38.9	-0.687
1	36476303	36477288	ENSG00000119535	0.0083	-	36476303	36477288	0	2	24,306,	0,679	-4.1	-4.79	-0.686
1	220813994	220814145	ENSG00000186205	0.18	+	220813994	220814145	0	1	151,	0	-1.35	-1.72	-0.676
1	110899240	110899301	ENSG00000143119	0.026	+	110899240	110899301	0	1	61,	0	-3.07	-3.66	-0.67
1	165907874	165908145	ENSG00000143179	0.0044	+	165907874	165908145	0	1	271,	0	-4.69	-5.42	-0.667
1	161039280	161039969	ENSG00000158773	7.6e-09	-	161039280	161039969	0	1	689,	0	-17.4	-18.7	-0.666
1	40239755	40240592	ENSG00000117000	0.077	+	40239755	40240592	0	1	837,	0	-2.08	-2.56	-0.663
1	236548965	236549295	ENSG00000116977	0.096	+	236548965	236549295	0	1	330,	0	-1.88	-2.34	-0.66
1	26282256	26282755	ENSG00000158062	0.0019	-	26282256	26282755	0	2	313,107,	0,392	-5.46	-6.25	-0.657
1	156250451	156250662	ENSG00000198952	0.022	-	156250451	156250662	0	1	211,	0	-3.22	-3.83	-0.656
1	23695720	23696447	ENSG00000142676	1.1e-116	+	23695720	23696447	0	2	226,104,	0,623	-264	-267	-0.651
1	12207912	12208212	ENSG00000028137	0.011	+	12207912	12208212	0	1	300,	0	-3.88	-4.55	-0.649
1	93239724	93270363	ENSG00000122483	0.093	+	93239724	93270363	0	8	172,100,117,144,204,138,247,17,	0,6380,7113,14746,16610,19023,24976,30622	-1.91	-2.37	-0.649
1	150334981	150345598	ENSG00000117360	0.0032	+	150334981	150345598	0	6	260,167,80,302,386,59,	0,3178,5416,8169,9180,10558	-4.98	-5.74	-0.649
1	33012334	33013290	ENSG00000004455	0.001	-	33012334	33013290	0	2	23,247,	0,709	-6.04	-6.86	-0.647
1	87345064	87345185	ENSG00000143013	0.18	+	87345064	87345185	0	1	121,	0	-1.34	-1.71	-0.646
1	149791438	149791709	ENSG00000150337	0.12	+	149791438	149791709	0	1	271,	0	-1.73	-2.16	-0.642
1	174957516	174964798	ENSG00000152061	0.058	+	174957516	174964798	0	3	33,297,31,	0,374,7251	-2.33	-2.84	-0.638
1	186420419	186421378	ENSG00000157181	0.11	+	186420419	186421378	0	1	959,	0	-1.8	-2.25	-0.632
1	55068425	55069085	ENSG00000162402	0.14	-	55068425	55069085	0	1	660,	0	-1.57	-1.98	-0.63
1	155062594	155062775	ENSG00000143537	0.036	+	155062594	155062775	0	1	181,	0	-2.77	-3.33	-0.625
1	206587052	206587682	ENSG00000266094	0.16	+	206587052	206587682	0	1	630,	0	-1.44	-1.82	-0.625
1	36300901	36304488	ENSG00000054118	0.0011	+	36300901	36304488	0	3	183,144,693,	0,651,2894	-5.95	-6.77	-0.621
1	25242236	25242597	ENSG00000117616	0.00066	-	25242236	25242597	0	1	361,	0	-6.48	-7.33	-0.616
1	3889691	3890903	ENSG00000198912	0.11	-	3889691	3890903	0	2	382,335,	0,877	-1.8	-2.24	-0.615
1	42851099	42851968	ENSG00000164011	0.15	+	42851099	42851968	0	1	869,	0	-1.52	-1.92	-0.614
1	182599820	182602022	ENSG00000143333	0.14	-	182599820	182602022	0	2	693,57,	0,2145	-1.55	-1.96	-0.609
1	6223467	6223977	ENSG00000116237	0.032	-	6223467	6223977	0	1	510,	0	-2.86	-3.43	-0.605
1	226385641	226392268	ENSG00000143799	0.051	-	226385641	226392268	0	5	39,117,100,215,70,	0,684,3014,4768,6557	-2.45	-2.97	-0.602
1	11054583	11054791	ENSG00000116649	1.4e-07	-	11054583	11054791	0	1	208,	0	-14.6	-15.8	-0.601
1	633695	634376	ENSG00000248527	3.1e-06	+	633695	634376	0	1	681,	0	-11.6	-12.7	-0.598
1	20855046	20864657	ENSG00000075151	0.16	-	20855046	20864657	0	5	25,95,133,105,182,	0,2356,5338,7181,9429	-1.42	-1.81	-0.598
1	36455747	36456485	ENSG00000116898	5.6e-09	-	36455747	36456485	0	2	178,299,	0,439	-17.7	-19	-0.588
1	28201030	28208548	ENSG00000126698	1.2e-05	-	28201030	28208548	0	4	340,76,93,207,	0,2716,4227,7311	-10.3	-11.3	-0.581
1	32190197	32195361	ENSG00000084652	0.14	+	32190197	32195361	0	6	52,120,75,93,96,460,	0,2113,2459,3010,3867,4704	-1.55	-1.96	-0.578
1	246840537	246850406	ENSG00000153207	0.01	-	246840537	246850406	0	4	461,83,134,792,	0,2156,3257,9077	-3.92	-4.6	-0.575
1	186313809	186317499	ENSG00000047410	0.013	-	186313809	186317499	0	3	217,96,18,	0,819,3672	-3.69	-4.34	-0.57
1	92474761	92476130	ENSG00000162676	1.7e-11	-	92474761	92476130	0	1	1369,	0	-23.3	-24.8	-0.564
1	184790992	184791292	ENSG00000135842	0.031	-	184790992	184791292	0	1	300,	0	-2.9	-3.48	-0.562
1	244840588	244840827	ENSG00000203667	0.00018	+	244840588	244840827	0	1	239,	0	-7.7	-8.62	-0.558
1	150513368	150513789	ENSG00000143369	0.071	+	150513368	150513789	0	1	421,	0	-2.15	-2.64	-0.555
1	1786723	1786934	ENSG00000078369	0.045	-	1786723	1786934	0	1	211,	0	-2.56	-3.1	-0.555
1	32038047	32042627	ENSG00000121774	0.056	+	32038047	32042627	0	4	72,68,59,101,	0,504,1467,4479	-2.37	-2.89	-0.553
1	247425112	247425681	ENSG00000162711	0.19	+	247425112	247425681	0	1	569,	0	-1.3	-1.66	-0.553
1	16459868	16460078	ENSG00000157191	0.055	+	16459868	16460078	0	1	210,	0	-2.38	-2.9	-0.549
1	244840637	244840818	ENSG00000153187	0.00049	-	244840637	244840818	0	1	181,	0	-6.76	-7.62	-0.545
1	215619249	215620642	ENSG00000136636	0.16	+	215619249	215620642	0	2	42,586,	0,807	-1.47	-1.86	-0.541
1	175944830	175944980	ENSG00000143207	0.14	-	175944830	175944980	0	1	150,	0	-1.57	-1.98	-0.541
1	154156891	154157101	ENSG00000143549	0.0006	-	154156891	154157101	0	1	210,	0	-6.57	-7.42	-0.538
1	156237215	156240042	ENSG00000160783	9.3e-05	+	156237215	156240042	0	2	76,495,	0,2332	-8.32	-9.28	-0.537
1	36475763	36475974	ENSG00000119535	0.005	-	36475763	36475974	0	1	211,	0	-4.56	-5.29	-0.531
1	44725411	44725591	ENSG00000198520	0.046	+	44725411	44725591	0	1	180,	0	-2.54	-3.08	-0.528
1	180502175	180502385	ENSG00000230124	0.12	-	180502175	180502385	0	1	210,	0	-1.68	-2.1	-0.527
1	224389400	224393938	ENSG00000162923	0.0019	-	224389400	224393938	0	2	460,111,	0,4427	-5.49	-6.28	-0.526
1	67413056	67419893	ENSG00000142864	1.4e-05	-	67413056	67419893	0	3	207,174,129,	0,2109,6708	-10.1	-11.2	-0.519
1	150560737	150560976	ENSG00000203804	0.0059	-	150560737	150560976	0	1	239,	0	-4.41	-5.13	-0.518
1	214655169	214664108	ENSG00000117724	7.4e-05	+	214655169	214664108	0	4	234,478,179,518,	0,1763,3680,8421	-8.54	-9.51	-0.516
1	201969737	201969857	ENSG00000134375	0.1	+	201969737	201969857	0	1	120,	0	-1.82	-2.27	-0.515
1	150560727	150560937	ENSG00000143382	0.0054	+	150560727	150560937	0	1	210,	0	-4.5	-5.22	-0.513
1	44635952	44645361	ENSG00000126106	0.18	-	44635952	44645361	0	2	505,2,	0,9407	-1.32	-1.69	-0.511
1	51787368	51787924	ENSG00000117859	0.13	+	51787368	51787924	0	2	120,210,	0,346	-1.62	-2.04	-0.505
1	108648708	108649358	ENSG00000162639	0.17	-	108648708	108649358	0	2	283,18,	0,632	-1.4	-1.78	-0.496
1	220884160	220885059	ENSG00000136630	0.0015	+	220884160	220885059	0	1	899,	0	-5.68	-6.48	-0.495
1	155185823	155186003	ENSG00000185499	0.09	-	155185823	155186003	0	1	180,	0	-1.94	-2.41	-0.493
1	155913971	155914392	ENSG00000132680	0.058	-	155913971	155914392	0	1	421,	0	-2.33	-2.84	-0.492
1	149900261	149900798	ENSG00000178096	0.023	+	149900261	149900798	0	1	537,	0	-3.19	-3.79	-0.491
1	156725847	156727514	ENSG00000143319	0.18	-	156725847	156727514	0	2	20,609,	0,1058	-1.33	-1.7	-0.489
1	17407838	17408100	ENSG00000179051	0.13	-	17407838	17408100	0	1	262,	0	-1.6	-2.01	-0.484
1	17407865	17408105	ENSG00000179051	0.15	-	17407865	17408105	0	1	240,	0	-1.52	-1.92	-0.478
1	1401629	1402046	ENSG00000224870	0.14	+	1401629	1402046	0	1	417,	0	-1.55	-1.95	-0.475
1	167697242	167705291	ENSG00000198771	3.8e-10	+	167697242	167705291	0	2	600,628,	0,7421	-20.3	-21.7	-0.472
1	93875654	93877367	ENSG00000067334	0.082	-	93875654	93877367	0	2	129,1100,	0,613	-2.02	-2.5	-0.469
1	222650710	222660005	ENSG00000154305	0.13	+	222650710	222660005	0	14	1,111,72,105,123,112,56,91,139,182,61,36,68,100,	0,82,1266,1517,2297,2517,3532,3678,3944,7931,8742,8911,9023,9195	-1.64	-2.06	-0.467
1	156594486	156595716	ENSG00000160818	0.0054	-	156594486	156595716	0	1	1230,	0	-4.5	-5.22	-0.462
1	50441218	50441459	ENSG00000185104	0.044	-	50441218	50441459	0	1	241,	0	-2.59	-3.13	-0.461
1	150622104	150622285	ENSG00000143420	0.0031	-	150622104	150622285	0	1	181,	0	-5.01	-5.77	-0.457
1	202147012	202148182	ENSG00000143851	7.8e-20	-	202147012	202148182	0	1	1170,	0	-42.1	-44	-0.456
1	154206695	154206906	ENSG00000143612	0.00039	-	154206695	154206906	0	1	211,	0	-6.97	-7.84	-0.443
1	19327675	19329300	ENSG00000040487	0.00052	+	19327675	19329300	0	2	406,729,	0,896	-6.71	-7.57	-0.436
1	155737017	155738590	ENSG00000132676	4.5e-05	+	155737017	155738590	0	2	46,434,	0,1139	-9.04	-10	-0.429
1	153991552	153992125	ENSG00000177954	9.4e-17	+	153991552	153992125	0	2	146,61,	0,512	-35.2	-36.9	-0.414
1	2403077	2403467	ENSG00000157916	0.046	+	2403077	2403467	0	1	390,	0	-2.54	-3.07	-0.412
1	155269453	155270933	ENSG00000176444	0.077	-	155269453	155270933	0	2	263,126,	0,1354	-2.08	-2.57	-0.408
1	248811164	248811554	ENSG00000175137	0.13	-	248811164	248811554	0	1	390,	0	-1.64	-2.06	-0.406
1	70239507	70248487	ENSG00000116754	0.021	+	70239507	70248487	0	5	13,132,178,33,94,	0,5176,7222,7609,8886	-3.25	-3.87	-0.403
1	229299022	229304016	ENSG00000168118	0.078	+	229299022	229304016	0	3	50,128,211,	0,3839,4783	-2.07	-2.55	-0.403
1	35176377	35177441	ENSG00000116560	0.14	-	35176377	35177441	0	2	97,233,	0,831	-1.55	-1.95	-0.397
1	226374253	226379593	ENSG00000143799	0.16	-	226374253	226379593	0	4	101,196,133,21,	0,2854,4888,5319	-1.46	-1.85	-0.397
1	111456726	111461007	ENSG00000116459	0.0031	+	111456726	111461007	0	3	29,180,91,	0,2730,4190	-5.02	-5.77	-0.392
1	155659442	155659862	ENSG00000163374	0.071	-	155659442	155659862	0	1	420,	0	-2.15	-2.64	-0.387
1	28237740	28246609	ENSG00000130770	0.0034	+	28237740	28246609	0	2	365,21,	0,8848	-4.92	-5.67	-0.386
1	11975119	11975538	ENSG00000083444	0.066	+	11975119	11975538	0	1	419,	0	-2.22	-2.72	-0.379
1	155320320	155320708	ENSG00000225855	0.00093	-	155320320	155320708	0	1	388,	0	-6.15	-6.98	-0.377
1	160217375	160217526	ENSG00000258465	0.17	-	160217375	160217526	0	1	151,	0	-1.39	-1.77	-0.354
1	244855404	244855735	ENSG00000153187	0.017	-	244855404	244855735	0	1	331,	0	-3.45	-4.08	-0.353
1	234607007	234609483	ENSG00000228830	1e-10	+	234607007	234609483	0	2	630,63,	0,2413	-21.6	-23	-0.343
1	173863899	173864049	ENSG00000234741	2.5e-10	-	173863899	173864049	0	1	150,	0	-20.7	-22.1	-0.331
1	151267238	151267479	ENSG00000159352	0.035	+	151267238	151267479	0	1	241,	0	-2.78	-3.35	-0.33
1	155319855	155320666	ENSG00000160752	0.0016	+	155319855	155320666	0	2	73,258,	0,553	-5.64	-6.44	-0.322
1	53214098	53216856	ENSG00000162384	0.14	-	53214098	53216856	0	3	638,66,75,	0,1892,2683	-1.56	-1.96	-0.313
1	51789190	51789401	ENSG00000078618	0.031	-	51789190	51789401	0	1	211,	0	-2.89	-3.47	-0.312
1	235131601	235160168	ENSG00000188739	0.011	-	235131601	235160168	0	10	396,122,81,64,84,44,278,232,87,19,	0,4047,4432,6275,6489,16802,20886,23279,24993,28548	-3.87	-4.54	-0.304
1	212445907	212446173	ENSG00000117691	0.08	+	212445907	212446173	0	1	266,	0	-2.05	-2.53	-0.297
1	26573327	26574731	ENSG00000117676	2e-05	+	26573327	26574731	0	2	34,653,	0,751	-9.81	-10.8	-0.293
1	235131633	235160611	ENSG00000054267	0.011	-	235131633	235160611	0	9	364,119,40,64,84,44,60,232,101,	0,4018,4400,6243,6457,16770,21072,23247,28877	-3.82	-4.49	-0.291
1	156058299	156058510	ENSG00000116586	0.04	+	156058299	156058510	0	1	211,	0	-2.67	-3.22	-0.277
1	50970430	50974304	ENSG00000123080	0.014	+	50970430	50974304	0	2	67,412,	0,3462	-3.63	-4.28	-0.274
1	152032505	152032713	ENSG00000163191	1.2e-05	-	152032505	152032713	0	1	208,	0	-10.3	-11.3	-0.274
1	154988445	154990224	ENSG00000160688	0.079	+	154988445	154990224	0	3	567,148,66,	0,1114,1713	-2.06	-2.54	-0.269
1	151176438	151176708	ENSG00000163159	0.099	-	151176438	151176708	0	1	270,	0	-1.86	-2.31	-0.265
1	43164264	43166912	ENSG00000117395	0.15	-	43164264	43166912	0	3	229,163,87,	0,378,2561	-1.49	-1.88	-0.262
1	35184521	35191438	ENSG00000116560	0.013	-	35184521	35191438	0	9	72,122,49,118,85,197,96,302,98,	0,2479,2681,3451,4481,4664,5976,6172,6819	-3.69	-4.34	-0.254
1	89714374	89715154	ENSG00000171488	0.16	+	89714374	89715154	0	1	780,	0	-1.43	-1.81	-0.225
1	119744075	119744226	ENSG00000092621	0.16	+	119744075	119744226	0	1	151,	0	-1.42	-1.81	-0.225
1	19258702	19259445	ENSG00000053372	0.18	+	19258702	19259445	0	1	743,	0	-1.35	-1.72	-0.215
1	44778538	44778779	ENSG00000142937	0.0027	+	44778538	44778779	0	1	241,	0	-5.15	-5.92	-0.194
1	234606809	234608867	ENSG00000168264	0.00029	-	234606809	234608867	0	3	1043,61,421,	0,1224,1637	-7.25	-8.14	-0.153
1	42683393	42702112	ENSG00000065978	0.034	+	42683393	42702112	0	7	73,34,90,303,83,266,132,	0,10096,12805,13248,13786,17387,18587	-2.81	-3.38	-0.135
1	219968600	219969211	ENSG00000136628	0.12	-	219968600	219969211	0	2	356,154,	0,457	-1.7	-2.12	0.142
1	92840473	92841924	ENSG00000122406	7.5e-08	+	92840473	92841924	0	3	27,115,159,	0,51,1292	-15.2	-16.4	0.186
1	92833856	92834985	ENSG00000122406	0.016	+	92833856	92834985	0	2	93,207,	0,922	-3.52	-4.16	0.198
1	244841776	244842167	ENSG00000153187	0.074	-	244841776	244842167	0	1	391,	0	-2.13	-2.61	0.256
1	156737302	156738114	ENSG00000143314	0.0036	-	156737302	156738114	0	3	232,131,84,	0,343,728	-4.88	-5.62	0.291
1	25900894	25901693	ENSG00000117632	0.0012	-	25900894	25901693	0	2	193,287,	0,512	-5.9	-6.72	0.292
1	151178061	151185694	ENSG00000163159	0.13	-	151178061	151185694	0	3	84,177,189,	0,6255,7444	-1.62	-2.03	0.303
1	145925841	145926677	ENSG00000265241	0.024	-	145925841	145926677	0	3	86,137,196,	0,199,640	-3.14	-3.75	0.307
1	92837386	92837717	ENSG00000122406	1.9e-10	+	92837386	92837717	0	1	331,	0	-21	-22.4	0.312
1	1373729	1374125	ENSG00000175756	0.0011	-	1373729	1374125	0	2	173,126,	0,270	-5.96	-6.77	0.324
1	248850005	248850216	ENSG00000171163	0.02	-	248850005	248850216	0	1	211,	0	-3.29	-3.91	0.326
1	46310121	46316656	ENSG00000173660	0.00012	+	46310121	46316656	0	2	195,105,	0,6430	-8.07	-9.01	0.348
1	6186599	6193038	ENSG00000116251	0.0067	-	6186599	6193038	0	2	217,112,	0,6327	-4.29	-5	0.35
1	155947569	155951247	ENSG00000116584	6.8e-06	-	155947569	155951247	0	3	446,214,419,	0,2699,3259	-10.8	-11.9	0.357
1	225919876	225920175	ENSG00000143811	0.0024	-	225919876	225920175	0	1	299,	0	-5.26	-6.03	0.369
1	44777527	44778210	ENSG00000142937	3.1e-50	+	44777527	44778210	0	2	262,308,	0,375	-112	-114	0.381
1	26922443	26945170	ENSG00000090273	0.0058	+	26922443	26945170	0	7	49,78,204,66,117,195,36,	0,1645,19013,19309,20216,20427,22691	-4.44	-5.15	0.386
1	114717301	114717452	ENSG00000009307	0.02	-	114717301	114717452	0	1	151,	0	-3.29	-3.9	0.411
1	110053725	110054084	ENSG00000143093	0.17	+	110053725	110054084	0	1	359,	0	-1.42	-1.8	0.413
1	153981676	153982304	ENSG00000143545	0.023	-	153981676	153982304	0	1	628,	0	-3.18	-3.78	0.442
1	52411120	52416708	ENSG00000134748	0.065	+	52411120	52416708	0	7	80,111,113,27,98,49,61,	0,1393,2758,3500,3641,4217,5527	-2.24	-2.74	0.443
1	23694735	23694885	ENSG00000142676	2.6e-19	+	23694735	23694885	0	1	150,	0	-40.9	-42.8	0.459
1	161230295	161230714	ENSG00000158882	0.17	+	161230295	161230714	0	1	419,	0	-1.42	-1.8	0.465
1	244841751	244842051	ENSG00000203667	0.0021	+	244841751	244842051	0	1	300,	0	-5.37	-6.15	0.466
1	32332015	32333129	ENSG00000116478	0.0056	+	32332015	32333129	0	3	227,49,113,	0,685,1001	-4.46	-5.18	0.485
1	147284430	147286394	ENSG00000131778	0.044	+	147284430	147286394	0	3	69,164,97,	0,893,1867	-2.59	-3.13	0.491
1	156009047	156009228	ENSG00000163479	5.6e-12	-	156009047	156009228	0	1	181,	0	-24.4	-25.9	0.506
1	156233681	156243036	ENSG00000260238	0.061	+	156233681	156243036	0	5	47,196,39,70,4,	0,2606,8871,9080,9351	-2.29	-2.8	0.519
1	32231395	32231604	ENSG00000084623	0.042	+	32231395	32231604	0	1	209,	0	-2.64	-3.18	0.522
1	50968892	50969491	ENSG00000123080	0.0049	+	50968892	50969491	0	1	599,	0	-4.59	-5.32	0.527
1	156233697	156236556	ENSG00000160783	0.07	+	156233697	156236556	0	2	31,269,	0,2590	-2.16	-2.66	0.538
1	36096612	36097241	ENSG00000171812	0.13	-	36096612	36097241	0	1	629,	0	-1.6	-2.01	0.549
1	12207404	12207614	ENSG00000028137	0.075	+	12207404	12207614	0	1	210,	0	-2.1	-2.59	0.557
1	153644371	153645498	ENSG00000160679	0.00017	+	153644371	153645498	0	2	14,435,	0,692	-7.77	-8.7	0.557
1	161042618	161043360	ENSG00000158773	0.088	-	161042618	161043360	0	3	52,50,108,	0,214,634	-1.96	-2.43	0.561
1	19086694	19088937	ENSG00000127481	0.027	-	19086694	19088937	0	3	127,114,179,	0,1121,2064	-3.04	-3.63	0.579
1	156743514	156743575	ENSG00000143321	0.17	-	156743514	156743575	0	1	61,	0	-1.38	-1.75	0.6
1	26474012	26474748	ENSG00000198830	0.00036	+	26474012	26474748	0	2	123,177,	0,559	-7.05	-7.93	0.601
1	75733445	75745549	ENSG00000117054	0.016	+	75733445	75745549	0	4	183,241,131,73,	0,1185,6534,12031	-3.5	-4.14	0.606
1	228106678	228106739	ENSG00000162910	0.096	-	228106678	228106739	0	1	61,	0	-1.88	-2.34	0.63
1	154170372	154170822	ENSG00000143549	0.0039	-	154170372	154170822	0	2	97,174,	0,276	-4.8	-5.55	0.648
1	153977979	153982575	ENSG00000285641	0.085	-	153977979	153982575	0	4	37,138,54,41,	0,4059,4411,4555	-1.99	-2.47	0.649
1	10629829	10630039	ENSG00000142655	0.15	+	10629829	10630039	0	1	210,	0	-1.48	-1.87	0.664
1	51840221	51862210	ENSG00000078618	0.17	-	51840221	51862210	0	2	293,97,	0,21892	-1.38	-1.75	0.699
1	1234531	1235041	ENSG00000176022	0.014	+	1234531	1235041	0	1	510,	0	-3.63	-4.28	0.705
1	32780084	32780415	ENSG00000134684	0.00071	-	32780084	32780415	0	1	331,	0	-6.41	-7.25	0.719
1	32782098	32782549	ENSG00000134684	0.04	-	32782098	32782549	0	2	5,146,	0,305	-2.66	-3.21	0.741
1	23971861	23975003	ENSG00000188529	0.12	-	23971861	23975003	0	2	151,30,	0,3112	-1.67	-2.09	0.755
1	45627303	45627694	ENSG00000159592	0.022	-	45627303	45627694	0	1	391,	0	-3.19	-3.8	0.764
1	1254892	1255042	ENSG00000160087	0.0027	-	1254892	1255042	0	1	150,	0	-5.15	-5.92	0.786
1	151185753	151190077	ENSG00000163159	0.0072	-	151185753	151190077	0	2	197,73,	0,4251	-4.24	-4.94	0.796
1	154945872	154946291	ENSG00000163346	0.032	-	154945872	154946291	0	1	419,	0	-2.86	-3.43	0.806
1	173488626	173488807	ENSG00000117592	0.034	+	173488626	173488807	0	1	181,	0	-2.83	-3.39	0.808
1	206734132	206734283	ENSG00000162889	0.0012	+	206734132	206734283	0	1	151,	0	-5.93	-6.75	0.814
1	156743634	156745017	ENSG00000143321	3.1e-18	-	156743634	156745017	0	4	244,186,70,10,	0,528,866,1373	-38.5	-40.3	0.816
1	40257255	40257878	ENSG00000259943	0.018	-	40257255	40257878	0	1	623,	0	-3.36	-3.99	0.817
1	90027360	90027840	ENSG00000162664	0.065	+	90027360	90027840	0	1	480,	0	-2.22	-2.73	0.891
1	92835224	92836698	ENSG00000122406	2e-37	+	92835224	92836698	0	3	69,203,89,	0,965,1385	-82.1	-84.5	0.917
1	1221308	1228636	ENSG00000078808	4.6e-11	-	1221308	1228636	0	5	43,114,137,48,169,	0,1935,2523,5963,7159	-22.4	-23.8	0.946
1	155900140	155900500	ENSG00000143622	0.14	-	155900140	155900500	0	1	360,	0	-1.59	-2	0.979
1	15428705	15428914	ENSG00000142634	8.3e-06	+	15428705	15428914	0	1	209,	0	-10.6	-11.7	1
1	154172858	154178131	ENSG00000143549	6.3e-13	-	154172858	154178131	0	4	120,118,134,18,	0,225,3256,5255	-26.5	-28.1	1
1	944562	945044	ENSG00000188976	8.3e-07	-	944562	945044	0	2	238,3,	0,479	-12.8	-14	1.03
1	181089040	181089250	ENSG00000162783	0.0096	+	181089040	181089250	0	1	210,	0	-3.97	-4.65	1.04
1	15944778	15945895	ENSG00000116809	0.015	-	15944778	15945895	0	3	61,266,181,	0,158,936	-3.57	-4.21	1.04
1	163355555	163355705	ENSG00000143228	0.089	+	163355555	163355705	0	1	150,	0	-1.95	-2.42	1.05
1	150220680	150229230	ENSG00000143401	2.1e-09	-	150220680	150229230	0	4	81,109,188,159,	0,2505,5927,8391	-18.7	-20	1.05
1	42682456	42682605	ENSG00000065978	0.097	+	42682456	42682605	0	1	149,	0	-1.87	-2.33	1.06
1	6097804	6098105	ENSG00000069424	0.093	+	6097804	6098105	0	1	301,	0	-1.91	-2.37	1.09
1	154946439	154946589	ENSG00000163346	0.082	-	154946439	154946589	0	1	150,	0	-2.02	-2.5	1.1
1	156466866	156467166	ENSG00000116604	4.7e-21	-	156466866	156467166	0	1	300,	0	-44.9	-46.8	1.22
1	28236256	28236525	ENSG00000130770	9.5e-19	+	28236256	28236525	0	2	14,165,	0,104	-39.7	-41.5	1.35
1	228489011	228493945	ENSG00000168159	1.4e-13	+	228489011	228493945	0	3	45,222,63,	0,4041,4871	-28.1	-29.6	1.36
1	40303628	40310129	ENSG00000049089	2.4e-35	-	40303628	40310129	0	15	48,33,45,36,72,54,54,72,54,45,54,54,54,54,19,	0,178,299,435,691,847,1165,1297,2086,2514,3817,4074,4563,6309,6482	-77.4	-79.7	1.36
1	24648937	24650597	ENSG00000133226	0.039	+	24648937	24650597	0	3	92,116,33,	0,1033,1627	-2.69	-3.24	1.39
1	37501774	37513484	ENSG00000163875	0.0045	-	37501774	37513484	0	4	222,46,88,62,	0,7503,7680,11648	-4.68	-5.41	1.4
1	181089489	181090118	ENSG00000162783	8.7e-24	+	181089489	181090118	0	1	629,	0	-51.1	-53.1	1.5
1	1496114	1496234	ENSG00000160072	0.0069	+	1496114	1496234	0	1	120,	0	-4.27	-4.97	1.7
1	36179185	36179396	ENSG00000116871	0.056	+	36179185	36179396	0	1	211,	0	-2.38	-2.89	1.74
1	33299410	33299768	ENSG00000160094	0.031	+	33299410	33299768	0	1	358,	0	-2.91	-3.49	1.8
1	160545407	160545737	ENSG00000066294	0.023	-	160545407	160545737	0	1	330,	0	-3.18	-3.78	1.8
1	234609046	234609286	ENSG00000168264	2.3e-09	-	234609046	234609286	0	1	240,	0	-18.6	-19.9	1.81
1	244863090	244864200	ENSG00000153187	1.3e-67	-	244863090	244864200	0	2	16,584,	0,526	-152	-154	1.84
1	155190737	155191066	ENSG00000185499	0.055	-	155190737	155191066	0	2	68,112,	0,217	-2.38	-2.9	1.9
1	155191274	155191575	ENSG00000185499	0.049	-	155191274	155191575	0	2	63,117,	0,184	-2.49	-3.02	1.94
1	160754373	160754821	ENSG00000026751	0.12	+	160754373	160754821	0	1	448,	0	-1.68	-2.1	2.08
1	153643174	153643235	ENSG00000160679	1.9e-09	+	153643174	153643235	0	1	61,	0	-18.8	-20.1	2.31
1	150579318	150579558	ENSG00000143384	2.1e-14	-	150579318	150579558	0	1	240,	0	-29.9	-31.5	2.48
1	183635547	183635697	ENSG00000162704	2.8e-06	-	183635547	183635697	0	1	150,	0	-11.7	-12.8	2.89
2	207186716	207186924	ENSG00000234902	0.036	-	207186716	207186924	0	1	208,	0	-2.77	-3.33	-4.05
2	95816036	95816215	ENSG00000232931	0.058	-	95816036	95816215	0	1	179,	0	-2.33	-2.84	-3.96
2	135724162	135724283	ENSG00000048991	0.00067	+	135724162	135724283	0	1	121,	0	-6.47	-7.31	-3.76
2	199348808	199349108	ENSG00000119042	9.1e-05	-	199348808	199349108	0	1	300,	0	-8.35	-9.3	-3.23
2	240527072	240527762	ENSG00000144504	0.0065	-	240527072	240527762	0	1	690,	0	-4.32	-5.03	-3.23
2	54649768	54649889	ENSG00000115306	0.042	+	54649768	54649889	0	1	121,	0	-2.62	-3.16	-3.21
2	121339871	121340112	ENSG00000074054	0.017	-	121339871	121340112	0	1	241,	0	-3.46	-4.1	-3.18
2	10426459	10426808	ENSG00000115756	2.3e-06	+	10426459	10426808	0	2	36,85,	0,264	-11.9	-13	-3.13
2	73227057	73227237	ENSG00000135632	5.5e-05	+	73227057	73227237	0	1	180,	0	-8.83	-9.81	-3.1
2	27325848	27325939	ENSG00000115207	0.006	-	27325848	27325939	0	1	91,	0	-4.4	-5.12	-3.04
2	27377203	27377533	ENSG00000115234	4.1e-07	+	27377203	27377533	0	1	330,	0	-13.5	-14.7	-2.96
2	28395700	28404211	ENSG00000075426	0.00046	+	28395700	28404211	0	2	76,105,	0,8406	-6.81	-7.68	-2.96
2	159902508	159902809	ENSG00000054219	0.056	-	159902508	159902809	0	1	301,	0	-2.37	-2.88	-2.94
2	20686768	20686949	ENSG00000118961	0.075	-	20686768	20686949	0	1	181,	0	-2.1	-2.59	-2.77
2	74890849	74891328	ENSG00000159399	1.2e-05	+	74890849	74891328	0	1	479,	0	-10.2	-11.3	-2.69
2	218345384	218345595	ENSG00000127838	0.00029	+	218345384	218345595	0	1	211,	0	-7.26	-8.16	-2.56
2	216529189	216529578	ENSG00000197756	4.8e-05	+	216529189	216529578	0	1	389,	0	-8.96	-9.94	-2.51
2	73572493	73573183	ENSG00000116127	0.17	+	73572493	73573183	0	1	690,	0	-1.4	-1.78	-2.48
2	148784712	148786374	ENSG00000135999	0.0016	+	148784712	148786374	0	2	289,70,	0,1592	-5.65	-6.45	-2.48
2	27660993	27661174	ENSG00000119760	3.8e-11	-	27660993	27661174	0	1	181,	0	-22.6	-24	-2.46
2	74928373	74928583	ENSG00000204792	0.026	+	74928373	74928583	0	1	210,	0	-3.06	-3.66	-2.43
2	86466468	86466858	ENSG00000115548	0.0047	+	86466468	86466858	0	1	390,	0	-4.62	-5.35	-2.43
2	230542980	230543221	ENSG00000067066	0.08	+	230542980	230543221	0	1	241,	0	-2.04	-2.52	-2.4
2	37204141	37204262	ENSG00000218739	0.00017	+	37204141	37204262	0	1	121,	0	-7.76	-8.68	-2.35
2	27653030	27653361	ENSG00000119760	4.2e-11	-	27653030	27653361	0	1	331,	0	-22.5	-23.9	-2.34
2	241690509	241694181	ENSG00000168395	1.5e-05	+	241690509	241694181	0	2	144,67,	0,3605	-10.1	-11.1	-2.31
2	27377230	27377710	ENSG00000163795	3.1e-08	-	27377230	27377710	0	1	480,	0	-16.1	-17.3	-2.28
2	38985442	38986312	ENSG00000115904	4.2e-10	-	38985442	38986312	0	1	870,	0	-20.2	-21.6	-2.27
2	96552128	96552309	ENSG00000196843	8.3e-06	+	96552128	96552309	0	1	181,	0	-10.6	-11.7	-2.23
2	230391763	230393436	ENSG00000185404	0.11	+	230391763	230393436	0	3	44,143,23,	0,323,1650	-1.75	-2.19	-2.22
2	27309491	27309731	ENSG00000115204	9.7e-29	-	27309491	27309731	0	1	240,	0	-62.4	-64.5	-2.2
2	101986541	101987048	ENSG00000281162	0.018	+	101986541	101987048	0	1	507,	0	-3.41	-4.04	-2.19
2	55224091	55228144	ENSG00000162994	0.11	-	55224091	55228144	0	2	307,113,	0,3940	-1.76	-2.2	-2.19
2	177231529	177231799	ENSG00000116044	6.2e-07	-	177231529	177231799	0	1	270,	0	-13.2	-14.3	-2.18
2	240523881	240525695	ENSG00000144504	0.00021	-	240523881	240525695	0	2	500,11,	0,1803	-7.55	-8.47	-2.18
2	178617998	178618376	ENSG00000155657	0.032	-	178617998	178618376	0	2	83,188,	0,190	-2.86	-3.43	-2.12
2	45388679	45388859	ENSG00000068784	0.12	-	45388679	45388859	0	1	180,	0	-1.66	-2.08	-2.11
2	55291679	55291890	ENSG00000115355	0.031	-	55291679	55291890	0	1	211,	0	-2.91	-3.48	-2.1
2	206086062	206086303	ENSG00000114933	0.025	-	206086062	206086303	0	1	241,	0	-3.07	-3.67	-2.1
2	152676717	152679138	ENSG00000196504	0.0063	-	152676717	152679138	0	4	62,25,54,10,	0,733,2338,2411	-4.35	-5.06	-2.09
2	96252849	96253059	ENSG00000135956	0.019	-	96252849	96253059	0	1	210,	0	-3.32	-3.94	-2.07
2	27070442	27070622	ENSG00000084693	1.4e-27	+	27070442	27070622	0	1	180,	0	-59.7	-61.8	-2.05
2	184937907	184938237	ENSG00000170396	0.11	+	184937907	184938237	0	1	330,	0	-1.73	-2.17	-2.04
2	101007616	101008097	ENSG00000204634	2.8e-17	-	101007616	101008097	0	1	481,	0	-36.3	-38.1	-2.04
2	189782986	189783346	ENSG00000128699	2.1e-07	-	189782986	189783346	0	1	360,	0	-14.2	-15.4	-2.03
2	25743062	25743392	ENSG00000143970	0.17	-	25743062	25743392	0	1	330,	0	-1.4	-1.78	-2.02
2	158681231	158681382	ENSG00000144283	0.00096	+	158681231	158681382	0	1	151,	0	-6.12	-6.95	-2.01
2	25234088	25234389	ENSG00000119772	0.005	-	25234088	25234389	0	1	301,	0	-4.57	-5.3	-2
2	105266929	105267348	ENSG00000135966	0.014	-	105266929	105267348	0	1	419,	0	-3.63	-4.28	-2
2	127257349	127257470	ENSG00000163161	0.012	-	127257349	127257470	0	1	121,	0	-3.76	-4.42	-2
2	71349081	71349322	ENSG00000075292	0.16	+	71349081	71349322	0	1	241,	0	-1.45	-1.84	-1.98
2	127719942	127721844	ENSG00000136709	0.055	-	127719942	127721844	0	2	411,9,	0,1893	-2.38	-2.9	-1.98
2	71078487	71078667	ENSG00000124357	0.0017	+	71078487	71078667	0	1	180,	0	-5.57	-6.36	-1.96
2	113202719	113202930	ENSG00000125637	5.6e-07	+	113202719	113202930	0	1	211,	0	-13.2	-14.4	-1.96
2	231732484	231732695	ENSG00000156973	0.00016	-	231732484	231732695	0	1	211,	0	-7.82	-8.75	-1.95
2	130373464	130374392	ENSG00000072135	1.1e-23	+	130373464	130374392	0	1	928,	0	-50.9	-52.9	-1.93
2	95149480	95149959	ENSG00000144026	0.06	-	95149480	95149959	0	1	479,	0	-2.3	-2.81	-1.93
2	74833512	74833869	ENSG00000272711	0.15	-	74833512	74833869	0	1	357,	0	-1.52	-1.92	-1.91
2	219250640	219251180	ENSG00000127824	2.8e-16	-	219250640	219251180	0	1	540,	0	-34.1	-35.8	-1.89
2	66571262	66571383	ENSG00000143995	0.01	+	66571262	66571383	0	1	121,	0	-3.93	-4.61	-1.88
2	27070471	27070592	ENSG00000228474	4.3e-22	-	27070471	27070592	0	1	121,	0	-47.3	-49.2	-1.87
2	88027679	88028512	ENSG00000172086	4.2e-09	-	88027679	88028512	0	1	833,	0	-17.9	-19.3	-1.87
2	24038508	24039254	ENSG00000163026	0.082	-	24038508	24039254	0	1	746,	0	-2.03	-2.5	-1.86
2	177221658	177221868	ENSG00000170144	0.09	+	177221658	177221868	0	1	210,	0	-1.95	-2.41	-1.84
2	105334446	105334777	ENSG00000272994	0.1	-	105334446	105334777	0	1	331,	0	-1.84	-2.29	-1.84
2	207080969	207081210	ENSG00000118263	0.082	-	207080969	207081210	0	1	241,	0	-2.02	-2.5	-1.83
2	226864719	226865020	ENSG00000144468	0.14	+	226864719	226865020	0	1	301,	0	-1.59	-2	-1.81
2	3561507	3561745	ENSG00000234171	0.019	+	3561507	3561745	0	1	238,	0	-3.34	-3.96	-1.8
2	71686557	71686768	ENSG00000135636	1.4e-09	+	71686557	71686768	0	1	211,	0	-19	-20.4	-1.78
2	201479477	201480132	ENSG00000082146	0.18	+	201479477	201480132	0	2	54,125,	0,530	-1.33	-1.7	-1.77
2	174571679	174572009	ENSG00000115935	0.00014	-	174571679	174572009	0	1	330,	0	-7.93	-8.86	-1.77
2	159319938	159320239	ENSG00000123636	0.00051	-	159319938	159320239	0	1	301,	0	-6.73	-7.59	-1.76
2	161232876	161235561	ENSG00000136560	0.0013	+	161232876	161235561	0	2	21,220,	0,2465	-5.8	-6.61	-1.74
2	97756812	97757143	ENSG00000075568	0.00014	-	97756812	97757143	0	1	331,	0	-7.91	-8.84	-1.74
2	112216083	112216264	ENSG00000144161	0.057	-	112216083	112216264	0	1	181,	0	-2.34	-2.86	-1.74
2	218395218	218395368	ENSG00000018280	0.031	+	218395218	218395368	0	1	150,	0	-2.9	-3.47	-1.72
2	73258626	73258926	ENSG00000163013	0.095	-	73258626	73258926	0	1	300,	0	-1.89	-2.35	-1.72
2	112659137	112659737	ENSG00000144136	2.8e-05	+	112659137	112659737	0	1	600,	0	-9.45	-10.5	-1.7
2	201167777	201168138	ENSG00000003402	0.12	+	201167777	201168138	0	1	361,	0	-1.7	-2.13	-1.68
2	112531490	112531671	ENSG00000114999	0.011	+	112531490	112531671	0	1	181,	0	-3.82	-4.49	-1.67
2	230401755	230403224	ENSG00000185404	0.002	+	230401755	230403224	0	2	52,427,	0,1042	-5.44	-6.22	-1.66
2	200892027	200892235	ENSG00000196290	0.0027	+	200892027	200892235	0	1	208,	0	-5.14	-5.91	-1.65
2	65313187	65313428	ENSG00000198369	0.08	-	65313187	65313428	0	1	241,	0	-2.04	-2.52	-1.65
2	159938153	159938814	ENSG00000153246	0.07	-	159938153	159938814	0	1	661,	0	-2.17	-2.66	-1.65
2	144398338	144399208	ENSG00000169554	1.8e-05	-	144398338	144399208	0	1	870,	0	-9.91	-10.9	-1.63
2	74556746	74556807	ENSG00000115325	0.062	+	74556746	74556807	0	1	61,	0	-2.27	-2.78	-1.62
2	219559458	219561893	ENSG00000124006	0.074	-	219559458	219561893	0	2	39,172,	0,2263	-2.11	-2.6	-1.62
2	27326237	27326717	ENSG00000115207	1e-13	-	27326237	27326717	0	1	480,	0	-28.3	-29.9	-1.61
2	96593498	96593829	ENSG00000114982	0.00014	-	96593498	96593829	0	1	331,	0	-7.92	-8.86	-1.61
2	136114911	136115772	ENSG00000121966	7.4e-37	-	136114911	136115772	0	1	861,	0	-80.9	-83.2	-1.6
2	174348170	174350698	ENSG00000138433	4.2e-11	-	174348170	174350698	0	2	1002,39,	0,2489	-22.5	-23.9	-1.58
2	158624917	158631783	ENSG00000144283	0.074	+	158624917	158631783	0	2	510,31,	0,6835	-2.11	-2.6	-1.56
2	96860343	96860822	ENSG00000168758	6.2e-11	-	96860343	96860822	0	1	479,	0	-22	-23.5	-1.56
2	97766253	97792787	ENSG00000075568	0.0015	-	97766253	97792787	0	5	10,125,128,176,402,	0,224,6043,9589,26132	-5.71	-6.51	-1.54
2	54667621	54668716	ENSG00000115306	0.0047	+	54667621	54668716	0	2	25,366,	0,729	-4.63	-5.36	-1.53
2	99399317	99399768	ENSG00000158417	5.6e-08	+	99399317	99399768	0	1	451,	0	-15.5	-16.7	-1.53
2	105893645	105893856	ENSG00000071051	0.003	+	105893645	105893856	0	1	211,	0	-5.05	-5.81	-1.53
2	169546285	169546525	ENSG00000138399	0.0011	-	169546285	169546525	0	1	240,	0	-5.95	-6.77	-1.53
2	210153653	210154162	ENSG00000144445	0.098	-	210153653	210154162	0	1	509,	0	-1.86	-2.32	-1.51
2	172088418	172088598	ENSG00000144355	0.12	+	172088418	172088598	0	1	180,	0	-1.66	-2.08	-1.5
2	206086091	206086505	ENSG00000227946	0.0057	+	206086091	206086505	0	1	414,	0	-4.44	-5.16	-1.5
2	227357025	227357086	ENSG00000168958	0.076	+	227357025	227357086	0	1	61,	0	-2.09	-2.58	-1.5
2	161231096	161232817	ENSG00000136560	5.2e-05	+	161231096	161232817	0	2	455,85,	0,1636	-8.89	-9.87	-1.49
2	60461752	60462263	ENSG00000119866	0.12	-	60461752	60462263	0	1	511,	0	-1.71	-2.14	-1.49
2	66571532	66571772	ENSG00000143995	0.036	+	66571532	66571772	0	1	240,	0	-2.77	-3.33	-1.48
2	179944875	179950540	ENSG00000163510	1.4e-08	-	179944875	179950540	0	2	840,29,	0,5636	-16.8	-18.1	-1.48
2	112752348	112756750	ENSG00000169607	0.15	-	112752348	112756750	0	2	126,774,	0,3628	-1.52	-1.92	-1.47
2	113182589	113182889	ENSG00000125637	0.036	+	113182589	113182889	0	1	300,	0	-2.77	-3.33	-1.46
2	200573203	200573533	ENSG00000163535	0.1	+	200573203	200573533	0	1	330,	0	-1.82	-2.27	-1.46
2	27384884	27385214	ENSG00000115241	0.00064	-	27384884	27385214	0	1	330,	0	-6.5	-7.35	-1.46
2	207612967	207620685	ENSG00000144401	0.00039	-	207612967	207620685	0	3	476,19,45,	0,2705,7673	-6.98	-7.86	-1.46
2	238035912	238041499	ENSG00000184182	0.00083	+	238035912	238041499	0	2	28,212,	0,5375	-6.26	-7.09	-1.45
2	106093810	106096789	ENSG00000115652	0.00012	-	106093810	106096789	0	2	347,72,	0,2907	-8.11	-9.06	-1.44
2	170962845	170966109	ENSG00000115806	1.4e-06	+	170962845	170966109	0	2	101,320,	0,2944	-12.4	-13.5	-1.43
2	231524748	231525228	ENSG00000171596	0.0048	-	231524748	231525228	0	1	480,	0	-4.6	-5.33	-1.43
2	72891506	72891655	ENSG00000116096	0.058	+	72891506	72891655	0	1	149,	0	-2.33	-2.84	-1.41
2	173916795	173955213	ENSG00000172845	0.022	-	173916795	173955213	0	3	37,193,341,	0,1797,38077	-3.22	-3.83	-1.41
2	223959640	223959997	ENSG00000135900	0.00035	+	223959640	223959997	0	1	357,	0	-7.08	-7.97	-1.39
2	201168677	201170238	ENSG00000003402	0.013	+	201168677	201170238	0	1	1561,	0	-3.66	-4.31	-1.38
2	74504350	74504678	ENSG00000257702	0.16	+	74504350	74504678	0	1	328,	0	-1.47	-1.86	-1.36
2	99436782	99439195	ENSG00000135945	0.087	-	99436782	99439195	0	2	9,622,	0,1791	-1.98	-2.44	-1.36
2	201266561	201269550	ENSG00000064012	0.15	+	201266561	201269550	0	2	230,41,	0,2948	-1.47	-1.87	-1.35
2	47807705	47808006	ENSG00000138081	0.019	-	47807705	47808006	0	1	301,	0	-3.33	-3.95	-1.35
2	152656000	152659103	ENSG00000196504	1.5e-10	-	152656000	152659103	0	3	398,136,156,	0,1884,2947	-21.2	-22.6	-1.35
2	159235792	159236089	ENSG00000196151	0.018	-	159235792	159236089	0	1	297,	0	-3.4	-4.02	-1.35
2	47807704	47808004	ENSG00000116062	0.021	+	47807704	47808004	0	1	300,	0	-3.27	-3.88	-1.34
2	159615500	159616362	ENSG00000123636	0.04	-	159615500	159616362	0	2	60,121,	0,741	-2.66	-3.21	-1.34
2	38564071	38568122	ENSG00000143889	0.016	-	38564071	38568122	0	2	166,44,	0,4007	-3.47	-4.11	-1.33
2	17781485	17781905	ENSG00000178295	0.075	+	17781485	17781905	0	1	420,	0	-2.1	-2.59	-1.32
2	37248220	37248521	ENSG00000003509	0.0062	+	37248220	37248521	0	1	301,	0	-4.37	-5.08	-1.32
2	238035936	238045770	ENSG00000258984	0.029	+	238035936	238045770	0	3	4,117,89,	0,5351,9745	-2.96	-3.54	-1.31
2	98600329	98602517	ENSG00000183513	1.8e-05	-	98600329	98602517	0	2	464,136,	0,2052	-9.87	-10.9	-1.31
2	134953557	134954877	ENSG00000082258	0.00031	+	134953557	134954877	0	1	1320,	0	-7.18	-8.07	-1.3
2	181922300	181928258	ENSG00000138434	0.0045	+	181922300	181928258	0	2	112,98,	0,5860	-4.66	-5.4	-1.3
2	207578000	207597507	ENSG00000118260	0.024	+	207578000	207597507	0	2	65,594,	0,18913	-3.12	-3.73	-1.3
2	177230782	177231381	ENSG00000116044	8.4e-09	-	177230782	177231381	0	1	599,	0	-17.3	-18.6	-1.3
2	37643980	37644191	ENSG00000163171	0.024	-	37643980	37644191	0	1	211,	0	-3.14	-3.74	-1.28
2	70297142	70300533	ENSG00000035141	0.0023	-	70297142	70300533	0	2	335,26,	0,3365	-5.32	-6.09	-1.27
2	219539185	219539875	ENSG00000123989	0.0023	-	219539185	219539875	0	1	690,	0	-5.32	-6.09	-1.27
2	231807789	231807880	ENSG00000144524	0.0031	+	231807789	231807880	0	1	91,	0	-5.02	-5.77	-1.25
2	9490072	9490432	ENSG00000151694	0.039	-	9490072	9490432	0	1	360,	0	-2.7	-3.25	-1.23
2	218594360	218594690	ENSG00000144580	0.0033	+	218594360	218594690	0	1	330,	0	-4.95	-5.7	-1.22
2	112233324	112238467	ENSG00000144161	0.12	-	112233324	112238467	0	4	47,117,134,153,	0,795,3237,4990	-1.71	-2.14	-1.22
2	135780300	135782933	ENSG00000144224	0.0072	+	135780300	135782933	0	2	85,185,	0,2448	-4.24	-4.94	-1.21
2	237758774	237764452	ENSG00000124831	2.8e-12	+	237758774	237764452	0	3	47,142,1850,	0,1289,3828	-25.1	-26.6	-1.21
2	232548058	232548685	ENSG00000221944	0.026	-	232548058	232548685	0	1	627,	0	-3.05	-3.65	-1.21
2	86212507	86212867	ENSG00000132313	0.0051	+	86212507	86212867	0	1	360,	0	-4.55	-5.28	-1.19
2	169633498	169637752	ENSG00000138398	1.9e-08	+	169633498	169637752	0	3	68,150,1340,	0,2593,2914	-16.5	-17.8	-1.19
2	99195121	99195683	ENSG00000241962	0.085	+	99195121	99195683	0	2	68,111,	0,451	-1.99	-2.46	-1.17
2	135167705	135169047	ENSG00000115839	0.0063	+	135167705	135169047	0	2	8,503,	0,839	-4.36	-5.07	-1.17
2	96593169	96593380	ENSG00000114982	0.025	-	96593169	96593380	0	1	211,	0	-3.1	-3.7	-1.17
2	199932823	199933243	ENSG00000162971	0.12	-	199932823	199933243	0	1	420,	0	-1.73	-2.16	-1.17
2	241255547	241256621	ENSG00000115677	0.046	-	241255547	241256621	0	3	33,216,22,	0,636,1052	-2.54	-3.07	-1.17
2	119681569	119685704	ENSG00000144120	0.01	+	119681569	119685704	0	2	549,47,	0,4088	-3.91	-4.59	-1.16
2	68822490	68826833	ENSG00000163219	0.0012	+	68822490	68826833	0	2	382,847,	0,3496	-5.92	-6.74	-1.14
2	241688044	241690450	ENSG00000168395	1.7e-06	+	241688044	241690450	0	2	18,613,	0,1793	-12.2	-13.3	-1.14
2	10784841	10785050	ENSG00000143882	0.0015	+	10784841	10785050	0	1	209,	0	-5.67	-6.48	-1.13
2	169081130	169083505	ENSG00000073737	9.3e-13	+	169081130	169083505	0	3	22,372,177,	0,392,2198	-26.1	-27.7	-1.13
2	201281903	201286634	ENSG00000064012	0.024	+	201281903	201286634	0	3	12,502,176,	0,2912,4555	-3.14	-3.75	-1.13
2	237779895	237780286	ENSG00000124831	0.0078	+	237779895	237780286	0	1	391,	0	-4.16	-4.85	-1.13
2	200861218	200861608	ENSG00000013441	0.015	-	200861218	200861608	0	1	390,	0	-3.53	-4.18	-1.13
2	241095635	241096265	ENSG00000122085	0.0012	-	241095635	241096265	0	1	630,	0	-5.88	-6.69	-1.13
2	218637975	218638454	ENSG00000115568	0.042	-	218637975	218638454	0	1	479,	0	-2.62	-3.16	-1.11
2	105342952	105345373	ENSG00000135974	0.046	+	105342952	105345373	0	2	271,59,	0,2362	-2.56	-3.09	-1.1
2	199323844	199328853	ENSG00000119042	0.12	-	199323844	199328853	0	2	114,156,	0,4853	-1.69	-2.12	-1.1
2	3479436	3484735	ENSG00000171853	0.063	+	3479436	3484735	0	2	135,16,	0,5283	-2.25	-2.76	-1.09
2	99195122	99195655	ENSG00000185414	0.18	+	99195122	99195655	0	2	67,83,	0,450	-1.36	-1.73	-1.09
2	38734060	38741117	ENSG00000143891	6.8e-06	+	38734060	38741117	0	2	708,13,	0,7044	-10.9	-11.9	-1.08
2	37223343	37228476	ENSG00000115816	0.0081	-	37223343	37228476	0	2	58,933,	0,4200	-4.12	-4.81	-1.07
2	70088461	70088669	ENSG00000169564	4.7e-19	+	70088461	70088669	0	1	208,	0	-40.3	-42.2	-1.06
2	26212565	26232246	ENSG00000084754	0.00027	-	26212565	26232246	0	5	61,134,123,103,87,	0,1877,2487,17626,19594	-7.32	-8.22	-1.06
2	200903603	200903930	ENSG00000196290	0.0014	+	200903603	200903930	0	1	327,	0	-5.74	-6.54	-1.05
2	47480769	47482887	ENSG00000095002	0.12	+	47480769	47482887	0	2	102,109,	0,2009	-1.72	-2.15	-1.04
2	71149149	71150101	ENSG00000124383	0.0052	+	71149149	71150101	0	2	304,236,	0,716	-4.53	-5.26	-1.03
2	159745856	159747964	ENSG00000136536	0.089	+	159745856	159747964	0	2	81,160,	0,1948	-1.95	-2.42	-1.03
2	8730130	8731119	ENSG00000134313	0.01	-	8730130	8731119	0	1	989,	0	-3.91	-4.58	-1.03
2	20251265	20251506	ENSG00000055917	0.12	-	20251265	20251506	0	1	241,	0	-1.66	-2.09	-1.03
2	189771281	189771402	ENSG00000128699	0.022	-	189771281	189771402	0	1	121,	0	-3.19	-3.8	-1.03
2	86146196	86151343	ENSG00000132305	0.015	-	86146196	86151343	0	3	1,132,47,	0,1505,5100	-3.55	-4.19	-1.02
2	3545538	3548659	ENSG00000171865	0.051	-	3545538	3548659	0	3	333,125,20,	0,2392,3101	-2.45	-2.97	-1.01
2	127941366	127942145	ENSG00000136715	0.02	-	127941366	127942145	0	1	779,	0	-3.28	-3.9	-1.01
2	218366642	218366881	ENSG00000158428	0.08	+	218366642	218366881	0	1	239,	0	-2.04	-2.52	-0.997
2	27358599	27358869	ENSG00000234072	0.13	+	27358599	27358869	0	1	270,	0	-1.6	-2.01	-0.97
2	181535558	181535768	ENSG00000115232	0.069	+	181535558	181535768	0	1	210,	0	-2.18	-2.67	-0.967
2	233837517	233841817	ENSG00000123485	2e-06	-	233837517	233841817	0	2	135,1209,	0,3091	-12	-13.1	-0.958
2	85326908	85327567	ENSG00000152291	0.046	-	85326908	85327567	0	1	659,	0	-2.55	-3.08	-0.956
2	37201582	37202228	ENSG00000218739	0.024	+	37201582	37202228	0	2	144,366,	0,280	-3.14	-3.74	-0.954
2	32617759	32618060	ENSG00000115760	0.016	+	32617759	32618060	0	1	301,	0	-3.51	-4.15	-0.94
2	222613836	222624334	ENSG00000116120	0.00026	-	222613836	222624334	0	4	92,93,81,63,	0,5808,9813,10435	-7.34	-8.25	-0.938
2	61188025	61188595	ENSG00000173209	5.7e-05	+	61188025	61188595	0	1	570,	0	-8.81	-9.78	-0.937
2	27083530	27083981	ENSG00000138080	0.1	+	27083530	27083981	0	1	451,	0	-1.83	-2.28	-0.929
2	190371066	190371665	ENSG00000151689	0.031	+	190371066	190371665	0	1	599,	0	-2.89	-3.47	-0.927
2	96251623	96252790	ENSG00000135956	9.3e-05	-	96251623	96252790	0	1	1167,	0	-8.33	-9.28	-0.925
2	61188031	61188601	ENSG00000115464	7.7e-05	-	61188031	61188601	0	1	570,	0	-8.51	-9.47	-0.918
2	96552397	96552638	ENSG00000196843	0.047	+	96552397	96552638	0	1	241,	0	-2.52	-3.05	-0.915
2	96271258	96271767	ENSG00000144021	1.4e-07	+	96271258	96271767	0	1	509,	0	-14.6	-15.8	-0.897
2	37645269	37646710	ENSG00000163171	9.4e-14	-	37645269	37646710	0	1	1441,	0	-28.4	-30	-0.897
2	127470368	127485935	ENSG00000163166	0.0087	-	127470368	127485935	0	3	17,370,62,	0,10437,15505	-4.06	-4.74	-0.895
2	218366664	218367031	ENSG00000225062	0.072	-	218366664	218367031	0	2	134,105,	0,262	-2.14	-2.63	-0.895
2	181915840	181916440	ENSG00000138434	0.1	+	181915840	181916440	0	1	600,	0	-1.84	-2.29	-0.886
2	200870936	200871383	ENSG00000240344	0.0027	-	200870936	200871383	0	1	447,	0	-5.15	-5.92	-0.876
2	27653420	27653481	ENSG00000119760	0.12	-	27653420	27653481	0	1	61,	0	-1.71	-2.14	-0.871
2	112573749	112575890	ENSG00000125630	0.00039	+	112573749	112575890	0	2	66,1044,	0,1097	-6.98	-7.86	-0.867
2	130151421	130152051	ENSG00000136699	0.039	-	130151421	130152051	0	1	630,	0	-2.69	-3.24	-0.863
2	18554902	18555621	ENSG00000240857	0.024	-	18554902	18555621	0	1	719,	0	-3.14	-3.75	-0.857
2	68173405	68175020	ENSG00000115946	0.12	+	68173405	68175020	0	2	12,286,	0,1329	-1.71	-2.13	-0.856
2	159615385	159616365	ENSG00000224152	0.00027	+	159615385	159616365	0	2	68,619,	0,361	-7.31	-8.21	-0.831
2	70087359	70088664	ENSG00000179818	3.1e-15	-	70087359	70088664	0	3	76,120,255,	0,428,1050	-31.8	-33.4	-0.822
2	218642134	218643151	ENSG00000115568	0.11	-	218642134	218643151	0	1	1017,	0	-1.75	-2.18	-0.818
2	127846735	127846939	ENSG00000244563	0.028	-	127846735	127846939	0	1	204,	0	-3.01	-3.59	-0.807
2	127846386	127846955	ENSG00000144231	0.002	-	127846386	127846955	0	1	569,	0	-5.43	-6.22	-0.801
2	112532210	112532420	ENSG00000114999	0.093	+	112532210	112532420	0	1	210,	0	-1.92	-2.38	-0.798
2	219182065	219182575	ENSG00000144567	0.0027	+	219182065	219182575	0	1	510,	0	-5.16	-5.93	-0.795
2	74526644	74527108	ENSG00000115307	7.7e-17	-	74526644	74527108	0	2	192,168,	0,296	-35.3	-37.1	-0.795
2	10210444	10211517	ENSG00000163009	0.13	+	10210444	10211517	0	1	1073,	0	-1.61	-2.02	-0.778
2	143155489	143235987	ENSG00000075884	0.14	+	143155489	143235987	0	7	166,113,69,62,60,88,42,	0,37894,46644,60894,72608,73091,80456	-1.58	-1.99	-0.775
2	207581673	207582063	ENSG00000144401	0.14	-	207581673	207582063	0	1	390,	0	-1.55	-1.95	-0.769
2	99337472	99379408	ENSG00000158417	0.00011	+	99337472	99379408	0	13	117,126,85,673,218,151,99,94,2,75,290,108,91,	0,22763,22992,23675,26172,26798,31020,31919,33665,34183,38874,41546,41845	-8.17	-9.11	-0.766
2	71109683	71110767	ENSG00000124370	0.19	-	71109683	71110767	0	2	439,5,	0,1079	-1.3	-1.67	-0.765
2	126686617	126696670	ENSG00000136732	0.0047	+	126686617	126696670	0	4	28,57,84,725,	0,3637,7246,9328	-4.62	-5.35	-0.756
2	64631620	64631920	ENSG00000179833	0.12	-	64631620	64631920	0	1	300,	0	-1.68	-2.11	-0.756
2	127486023	127502664	ENSG00000163166	0.0059	-	127486023	127502664	0	10	10,112,57,112,118,130,83,151,98,86,	0,529,3155,3808,5947,7257,8848,9974,12116,16555	-4.43	-5.14	-0.754
2	120221750	120222343	ENSG00000226479	0.077	-	120221750	120222343	0	1	593,	0	-2.08	-2.57	-0.747
2	218249755	218249906	ENSG00000163466	3.1e-06	+	218249755	218249906	0	1	151,	0	-11.6	-12.7	-0.745
2	208248403	208251333	ENSG00000138413	0.018	-	208248403	208251333	0	2	257,73,	0,2857	-3.4	-4.03	-0.743
2	62222347	62223331	ENSG00000170340	0.091	+	62222347	62223331	0	1	984,	0	-1.93	-2.4	-0.725
2	197706354	197707431	ENSG00000247626	0.081	+	197706354	197707431	0	1	1077,	0	-2.03	-2.51	-0.718
2	27677889	27691644	ENSG00000163798	0.18	+	27677889	27691644	0	6	35,112,241,87,68,87,	0,4358,7147,10044,10810,13668	-1.35	-1.73	-0.712
2	96186617	96186797	ENSG00000084090	0.055	-	96186617	96186797	0	1	180,	0	-2.38	-2.9	-0.709
2	233198193	233204152	ENSG00000168918	0.0012	+	233198193	233204152	0	2	183,27,	0,5932	-5.92	-6.74	-0.706
2	70296244	70296424	ENSG00000035141	0.021	-	70296244	70296424	0	1	180,	0	-3.24	-3.85	-0.704
2	28412221	28413180	ENSG00000075426	0.00018	+	28412221	28413180	0	1	959,	0	-7.73	-8.65	-0.702
2	15621338	15627098	ENSG00000079785	0.039	+	15621338	15627098	0	3	49,147,45,	0,2097,5715	-2.69	-3.24	-0.697
2	58146466	58159800	ENSG00000028116	0.011	+	58146466	58159800	0	3	8,49,452,	0,8287,12882	-3.85	-4.52	-0.683
2	58159242	58160116	ENSG00000115392	0.0093	-	58159242	58160116	0	2	558,9,	0,865	-4	-4.68	-0.676
2	218663863	218664811	ENSG00000163481	0.0086	-	218663863	218664811	0	2	672,73,	0,875	-4.07	-4.76	-0.657
2	86026989	86027470	ENSG00000068654	0.13	-	86026989	86027470	0	1	481,	0	-1.64	-2.06	-0.656
2	127705971	127708696	ENSG00000136709	0.0062	-	127705971	127708696	0	2	581,20,	0,2705	-4.37	-5.08	-0.653
2	173266389	173266960	ENSG00000091436	0.18	+	173266389	173266960	0	1	571,	0	-1.32	-1.69	-0.643
2	189475264	189475565	ENSG00000115368	0.014	+	189475264	189475565	0	1	301,	0	-3.62	-4.27	-0.639
2	100391859	100393475	ENSG00000115526	0.0045	-	100391859	100393475	0	1	1616,	0	-4.67	-5.4	-0.634
2	241675741	241675891	ENSG00000168393	0.11	-	241675741	241675891	0	1	150,	0	-1.8	-2.25	-0.632
2	233204420	233204691	ENSG00000168918	0.0061	+	233204420	233204691	0	1	271,	0	-4.38	-5.1	-0.625
2	38779370	38782014	ENSG00000152147	0.015	+	38779370	38782014	0	2	71,498,	0,2146	-3.57	-4.21	-0.614
2	169819615	169821243	ENSG00000138382	0.1	-	169819615	169821243	0	2	28,152,	0,1476	-1.81	-2.26	-0.601
2	113201492	113202182	ENSG00000125637	0.0092	+	113201492	113202182	0	1	690,	0	-4	-4.69	-0.6
2	151270614	151277373	ENSG00000123609	0.00014	-	151270614	151277373	0	5	261,107,187,107,119,	0,1011,4869,5143,6640	-7.9	-8.84	-0.594
2	152669139	152676448	ENSG00000196504	0.057	-	152669139	152676448	0	7	131,151,109,165,65,109,50,	0,1091,2133,3319,3838,4458,7259	-2.35	-2.86	-0.582
2	202206505	202206950	ENSG00000116030	0.0077	-	202206505	202206950	0	1	445,	0	-4.18	-4.87	-0.576
2	218272639	218316750	ENSG00000127838	0.039	+	218272639	218316750	0	2	308,23,	0,44088	-2.7	-3.25	-0.564
2	169806758	169808612	ENSG00000138385	0.091	+	169806758	169808612	0	2	313,136,	0,1718	-1.93	-2.4	-0.558
2	84423522	84423703	ENSG00000163541	0.048	-	84423522	84423703	0	1	181,	0	-2.51	-3.04	-0.547
2	68397094	68397453	ENSG00000115956	0.00024	+	68397094	68397453	0	1	359,	0	-7.45	-8.35	-0.543
2	27216940	27217178	ENSG00000138085	0.015	+	27216940	27217178	0	1	238,	0	-3.54	-4.18	-0.525
2	96365943	96373398	ENSG00000121152	0.13	+	96365943	96373398	0	5	115,117,92,76,107,	0,1313,3028,3481,7348	-1.63	-2.04	-0.523
2	241633179	241634019	ENSG00000176946	0.069	-	241633179	241634019	0	1	840,	0	-2.18	-2.68	-0.512
2	202880556	202880857	ENSG00000138442	0.12	-	202880556	202880857	0	1	301,	0	-1.71	-2.15	-0.507
2	43896653	43901594	ENSG00000138095	0.0011	-	43896653	43901594	0	4	55,116,183,275,	0,2565,2812,4666	-5.96	-6.78	-0.502
2	55295495	55296036	ENSG00000115355	0.17	-	55295495	55296036	0	1	541,	0	-1.38	-1.76	-0.493
2	97648118	97648236	ENSG00000135940	0.0048	+	97648118	97648236	0	1	118,	0	-4.61	-5.34	-0.479
2	218239160	218249636	ENSG00000163466	1.7e-08	+	218239160	218249636	0	5	35,172,127,101,45,	0,230,6259,10203,10431	-16.7	-17.9	-0.444
2	73958229	73958961	ENSG00000114956	0.016	+	73958229	73958961	0	2	16,252,	0,480	-3.52	-4.16	-0.441
2	241754821	241755334	ENSG00000234793	0.097	-	241754821	241755334	0	2	30,203,	0,310	-1.87	-2.33	-0.44
2	130346403	130346852	ENSG00000136718	0.044	+	130346403	130346852	0	1	449,	0	-2.58	-3.12	-0.433
2	37201611	37211046	ENSG00000115816	0.11	-	37201611	37211046	0	4	292,82,59,48,	0,1172,1338,9387	-1.76	-2.2	-0.429
2	218253966	218254356	ENSG00000163466	2.8e-08	+	218253966	218254356	0	1	390,	0	-16.2	-17.4	-0.427
2	169810220	169812034	ENSG00000138385	0.00012	+	169810220	169812034	0	4	382,187,141,367,	0,637,962,1447	-8.12	-9.07	-0.426
2	229767195	229768631	ENSG00000153827	0.0077	-	229767195	229768631	0	2	555,16,	0,1420	-4.18	-4.87	-0.426
2	10783353	10784217	ENSG00000143882	9.3e-05	+	10783353	10784217	0	1	864,	0	-8.33	-9.28	-0.413
2	144389231	144396586	ENSG00000169554	0.13	-	144389231	144396586	0	4	797,50,88,175,	0,1320,5161,7180	-1.6	-2.01	-0.409
2	10783390	10784229	ENSG00000143870	0.00015	-	10783390	10784229	0	1	839,	0	-7.85	-8.78	-0.399
2	222571727	222571937	ENSG00000116120	0.097	-	222571727	222571937	0	1	210,	0	-1.88	-2.33	-0.381
2	27779536	27782604	ENSG00000243147	0.028	+	27779536	27782604	0	2	205,33,	0,3035	-3	-3.59	-0.363
2	186506044	186509125	ENSG00000065548	0.011	+	186506044	186509125	0	4	47,124,80,583,	0,668,1350,2498	-3.81	-4.48	-0.363
2	113958070	113958280	ENSG00000115091	0.063	+	113958070	113958280	0	1	210,	0	-2.26	-2.77	-0.345
2	197408381	197418688	ENSG00000115524	0.015	-	197408381	197418688	0	4	313,238,318,180,	0,1388,8212,10127	-3.57	-4.22	-0.345
2	43223712	43224518	ENSG00000152518	0.0023	-	43223712	43224518	0	1	806,	0	-5.3	-6.07	-0.339
2	43222401	43222551	ENSG00000152518	0.029	-	43222401	43222551	0	1	150,	0	-2.95	-3.53	-0.326
2	121727600	121730416	ENSG00000155438	0.08	-	121727600	121730416	0	4	312,69,123,34,	0,687,876,2782	-2.05	-2.53	-0.324
2	71418615	71428720	ENSG00000075292	0.023	+	71418615	71428720	0	5	24,1225,66,955,190,	0,4198,6034,7844,9915	-3.15	-3.76	-0.313
2	224473894	224478347	ENSG00000036257	0.17	-	224473894	224478347	0	2	482,148,	0,4305	-1.41	-1.79	-0.298
2	119370789	119372560	ENSG00000155368	0.0062	+	119370789	119372560	0	2	13,316,	0,1455	-4.37	-5.08	-0.216
2	202300118	202303666	ENSG00000055044	0.13	+	202300118	202303666	0	4	19,134,137,281,	0,115,2802,3267	-1.62	-2.04	-0.182
2	26190843	26191053	ENSG00000084754	0.14	-	26190843	26191053	0	1	210,	0	-1.54	-1.94	-0.178
2	24067762	24073780	ENSG00000115128	0.12	-	24067762	24073780	0	3	89,139,132,	0,558,5886	-1.67	-2.1	-0.167
2	216501265	216501504	ENSG00000197756	0.067	+	216501265	216501504	0	1	239,	0	-2.21	-2.71	-0.0769
2	55235132	55235734	ENSG00000143947	0.042	+	55235132	55235734	0	2	52,307,	0,295	-2.63	-3.18	0.0989
2	216204257	216205467	ENSG00000079246	0.18	+	216204257	216205467	0	2	139,280,	0,930	-1.34	-1.71	0.132
2	73249130	73250369	ENSG00000135624	0.042	+	73249130	73250369	0	3	49,98,64,	0,688,1175	-2.63	-3.18	0.266
2	61868326	61868565	ENSG00000115484	0.13	-	61868326	61868565	0	1	239,	0	-1.62	-2.03	0.266
2	216190294	216204079	ENSG00000079246	0.096	+	216190294	216204079	0	4	40,97,68,64,	0,2344,4624,13721	-1.88	-2.34	0.271
2	47161807	47162630	ENSG00000143933	0.094	-	47161807	47162630	0	3	51,107,112,	0,478,711	-1.9	-2.36	0.298
2	55049749	55050199	ENSG00000115310	0.12	-	55049749	55050199	0	1	450,	0	-1.68	-2.11	0.354
2	28947892	28948222	ENSG00000163811	0.18	+	28947892	28948222	0	1	330,	0	-1.33	-1.7	0.431
2	186499645	186505159	ENSG00000065548	0.1	+	186499645	186505159	0	6	17,112,153,92,183,69,	0,536,1627,2850,4386,5445	-1.83	-2.28	0.432
2	84906024	84906675	ENSG00000034510	3.2e-27	+	84906024	84906675	0	2	93,287,	0,364	-58.9	-61	0.434
2	231454730	231455553	ENSG00000115053	1.1e-13	-	231454730	231455553	0	2	537,153,	0,670	-28.2	-29.8	0.451
2	61868431	61868580	ENSG00000236498	0.0091	+	61868431	61868580	0	1	149,	0	-4.02	-4.7	0.494
2	73252870	73253021	ENSG00000135624	0.0023	+	73252870	73253021	0	1	151,	0	-5.31	-6.08	0.506
2	95104562	95106584	ENSG00000144029	0.16	-	95104562	95106584	0	2	168,162,	0,1860	-1.45	-1.83	0.521
2	186505366	186505926	ENSG00000065548	0.077	+	186505366	186505926	0	2	231,187,	0,373	-2.08	-2.57	0.524
2	85544531	85545190	ENSG00000168906	1.9e-09	+	85544531	85545190	0	1	659,	0	-18.8	-20.1	0.542
2	24074048	24076234	ENSG00000115128	0.037	-	24074048	24076234	0	2	146,35,	0,2151	-2.75	-3.31	0.553
2	177216145	177219389	ENSG00000170144	0.00022	+	177216145	177219389	0	7	43,90,96,81,141,123,143,	0,357,530,714,1559,2891,3101	-7.52	-8.43	0.581
2	206161347	206162306	ENSG00000114942	2.8e-10	+	206161347	206162306	0	3	125,67,79,	0,690,880	-20.7	-22	0.592
2	95100511	95101804	ENSG00000144029	0.13	-	95100511	95101804	0	3	25,58,128,	0,325,1165	-1.65	-2.07	0.596
2	27307399	27307694	ENSG00000163794	0.11	-	27307399	27307694	0	1	295,	0	-1.75	-2.18	0.606
2	231460183	231461835	ENSG00000115053	3.6e-26	-	231460183	231461835	0	4	110,87,198,296,	0,294,485,1356	-56.5	-58.6	0.61
2	216499891	216500101	ENSG00000197756	6.1e-40	+	216499891	216500101	0	1	210,	0	-87.9	-90.3	0.65
2	85577617	85581611	ENSG00000118640	1.5e-12	+	85577617	85581611	0	4	32,159,133,36,	0,1391,2124,3958	-25.7	-27.2	0.669
2	85544722	85545172	ENSG00000115486	6.3e-13	-	85544722	85545172	0	1	450,	0	-26.5	-28.1	0.723
2	27212204	27212383	ENSG00000138085	0.08	+	27212204	27212383	0	1	179,	0	-2.05	-2.53	0.725
2	219250190	219250521	ENSG00000127824	0.003	-	219250190	219250521	0	1	331,	0	-5.04	-5.8	0.812
2	159350242	159383639	ENSG00000123636	0.18	-	159350242	159383639	0	5	115,145,63,244,34,	0,22802,24448,32316,33363	-1.33	-1.7	0.815
2	9630161	9630460	ENSG00000134308	0.013	-	9630161	9630460	0	1	299,	0	-3.67	-4.32	0.877
2	130152170	130152501	ENSG00000136699	0.013	-	130152170	130152501	0	1	331,	0	-3.67	-4.33	0.892
2	240129982	240131079	ENSG00000172428	7.5e-06	-	240129982	240131079	0	2	46,254,	0,843	-10.7	-11.8	0.92
2	53864815	53865115	ENSG00000068878	0.001	-	53864815	53865115	0	1	300,	0	-6.08	-6.91	0.933
2	74557194	74557554	ENSG00000115325	0.0015	+	74557194	74557554	0	1	360,	0	-5.71	-6.51	0.936
2	85543873	85543964	ENSG00000168906	0.14	+	85543873	85543964	0	1	91,	0	-1.59	-2	0.943
2	135840759	135844621	ENSG00000076003	0.0002	-	135840759	135844621	0	2	192,77,	0,3785	-7.63	-8.54	0.953
2	231711758	231713033	ENSG00000187514	3.3e-189	+	231711758	231713033	0	3	225,233,230,	0,684,1045	-434	-434	0.954
2	70216789	70216939	ENSG00000116001	0.14	-	70216789	70216939	0	1	150,	0	-1.57	-1.98	1.03
2	47073860	47074071	ENSG00000068724	1.5e-06	+	47073860	47074071	0	1	211,	0	-12.3	-13.4	1.07
2	219209501	219209651	ENSG00000158552	0.032	+	219209501	219209651	0	1	150,	0	-2.88	-3.45	1.19
2	144518441	144520320	ENSG00000169554	0.16	-	144518441	144520320	0	2	9,382,	0,1497	-1.44	-1.83	1.46
2	241151513	241155088	ENSG00000115685	0.06	+	241151513	241155088	0	3	39,129,71,	0,1962,3504	-2.3	-2.81	1.54
2	241126675	241127095	ENSG00000115687	0.014	-	241126675	241127095	0	1	420,	0	-3.62	-4.27	1.69
2	232553854	232557554	ENSG00000135930	0.036	+	232553854	232557554	0	3	33,181,26,	0,2561,3674	-2.76	-3.32	1.75
2	118977508	118981413	ENSG00000019169	0.11	+	118977508	118981413	0	3	7,108,5,	0,319,3900	-1.73	-2.17	1.79
2	74958790	74959083	ENSG00000115350	1.1e-21	+	74958790	74959083	0	2	102,78,	0,215	-46.4	-48.3	2.8
3	58123532	58124353	ENSG00000136068	0.036	+	58123532	58124353	0	2	158,22,	0,799	-2.76	-3.32	-3.97
3	44421315	44421578	ENSG00000225873	0.0012	-	44421315	44421578	0	1	263,	0	-5.9	-6.72	-3.25
3	56563795	56564036	ENSG00000180376	0.16	+	56563795	56564036	0	1	241,	0	-1.43	-1.81	-3.07
3	49717697	49717877	ENSG00000176020	0.15	-	49717697	49717877	0	1	180,	0	-1.48	-1.87	-3.04
3	49057771	49076767	ENSG00000198218	4.7e-05	-	49057771	49076767	0	2	119,61,	0,18935	-8.97	-9.96	-2.95
3	149172235	149172325	ENSG00000163755	0.035	+	149172235	149172325	0	1	90,	0	-2.79	-3.35	-2.85
3	51398527	51398677	ENSG00000145041	0.00052	-	51398527	51398677	0	1	150,	0	-6.7	-7.56	-2.81
3	44499759	44500148	ENSG00000178917	0.094	-	44499759	44500148	0	1	389,	0	-1.9	-2.36	-2.69
3	125233258	125233858	ENSG00000163848	0.081	-	125233258	125233858	0	1	600,	0	-2.03	-2.51	-2.63
3	196584218	196584369	ENSG00000174013	0.14	+	196584218	196584369	0	1	151,	0	-1.54	-1.94	-2.53
3	51419819	51420089	ENSG00000145041	0.014	-	51419819	51420089	0	1	270,	0	-3.64	-4.29	-2.53
3	52398913	52399094	ENSG00000114841	0.027	+	52398913	52399094	0	1	181,	0	-3.04	-3.63	-2.52
3	75422630	75422870	ENSG00000244026	0.012	-	75422630	75422870	0	1	240,	0	-3.74	-4.4	-2.52
3	51981020	51981199	ENSG00000248487	2.5e-10	+	51981020	51981199	0	1	179,	0	-20.7	-22.1	-2.47
3	52492052	52492293	ENSG00000010322	5.7e-13	+	52492052	52492293	0	1	241,	0	-26.7	-28.2	-2.42
3	44421126	44421567	ENSG00000225873	0.00021	-	44421126	44421567	0	1	441,	0	-7.56	-8.48	-2.39
3	126542962	126543053	ENSG00000180767	0.13	+	126542962	126543053	0	1	91,	0	-1.6	-2.02	-2.36
3	120750723	120750874	ENSG00000153767	0.11	+	120750723	120750874	0	1	151,	0	-1.74	-2.18	-2.35
3	138655095	138655395	ENSG00000051382	3.7e-06	-	138655095	138655395	0	1	300,	0	-11.4	-12.5	-2.32
3	122425544	122425844	ENSG00000114030	2.5e-06	-	122425544	122425844	0	1	300,	0	-11.8	-12.9	-2.31
3	56617239	56617540	ENSG00000180376	0.026	+	56617239	56617540	0	1	301,	0	-3.06	-3.66	-2.29
3	9818960	9819470	ENSG00000214021	4.2e-51	+	9818960	9819470	0	1	510,	0	-113	-116	-2.28
3	15259734	15260153	ENSG00000224660	0.13	+	15259734	15260153	0	1	419,	0	-1.61	-2.02	-2.25
3	187075891	187076101	ENSG00000073849	0.095	+	187075891	187076101	0	1	210,	0	-1.89	-2.35	-2.23
3	71755212	71755482	ENSG00000170837	0.012	+	71755212	71755482	0	1	270,	0	-3.78	-4.44	-2.2
3	48292880	48293031	ENSG00000172113	0.12	-	48292880	48293031	0	1	151,	0	-1.68	-2.11	-2.17
3	150458377	150458678	ENSG00000196428	0.086	+	150458377	150458678	0	1	301,	0	-1.98	-2.45	-2.15
3	52053998	52054059	ENSG00000164086	0.011	-	52053998	52054059	0	1	61,	0	-3.86	-4.54	-2.14
3	134531878	134532848	ENSG00000182923	0.13	+	134531878	134532848	0	2	62,89,	0,881	-1.62	-2.03	-2.12
3	52524344	52524495	ENSG00000010327	0.00054	+	52524344	52524495	0	1	151,	0	-6.67	-7.52	-2.09
3	15049573	15049753	ENSG00000131368	0.00041	-	15049573	15049753	0	1	180,	0	-6.93	-7.8	-2.08
3	50296461	50296642	ENSG00000243477	7e-05	-	50296461	50296642	0	1	181,	0	-8.59	-9.56	-2.08
3	47846357	47846448	ENSG00000132153	0.01	+	47846357	47846448	0	1	91,	0	-3.93	-4.6	-2.06
3	14168320	14172930	ENSG00000154767	0.15	-	14168320	14172930	0	3	60,177,64,	0,2117,4546	-1.51	-1.9	-2.03
3	160438604	160438993	ENSG00000213186	0.035	-	160438604	160438993	0	1	389,	0	-2.78	-3.34	-2.01
3	129905686	129906105	ENSG00000271270	0.00031	+	129905686	129906105	0	1	419,	0	-7.18	-8.07	-1.99
3	160438588	160438979	ENSG00000248710	0.038	-	160438588	160438979	0	1	391,	0	-2.72	-3.27	-1.99
3	129277593	129277773	ENSG00000181789	0.00015	+	129277593	129277773	0	1	180,	0	-7.88	-8.81	-1.98
3	127037181	127037392	ENSG00000114554	0.094	+	127037181	127037392	0	1	211,	0	-1.9	-2.36	-1.96
3	69104552	69104939	ENSG00000144746	3.1e-18	+	69104552	69104939	0	1	387,	0	-38.5	-40.3	-1.95
3	14945143	14946098	ENSG00000225733	1.5e-09	-	14945143	14946098	0	1	955,	0	-18.9	-20.3	-1.95
3	46202628	46203460	ENSG00000163823	1e-17	-	46202628	46203460	0	1	832,	0	-37.3	-39.1	-1.95
3	149960827	149961067	ENSG00000082996	0.0075	+	149960827	149961067	0	1	240,	0	-4.19	-4.89	-1.94
3	15451056	15451475	ENSG00000206561	2.8e-06	-	15451056	15451475	0	1	419,	0	-11.7	-12.8	-1.94
3	37025843	37028890	ENSG00000076242	3.4e-07	+	37025843	37028890	0	2	164,107,	0,2940	-13.8	-14.9	-1.93
3	49721229	49721529	ENSG00000164068	4.2e-09	+	49721229	49721529	0	1	300,	0	-17.9	-19.3	-1.92
3	125232060	125233079	ENSG00000163848	0.00093	-	125232060	125233079	0	1	1019,	0	-6.15	-6.98	-1.92
3	49047230	49057653	ENSG00000198218	1.7e-09	-	49047230	49057653	0	2	16,792,	0,9631	-18.9	-20.2	-1.91
3	186147726	186148117	ENSG00000058866	0.024	-	186147726	186148117	0	1	391,	0	-3.11	-3.71	-1.9
3	9841261	9841681	ENSG00000156990	0.04	-	9841261	9841681	0	1	420,	0	-2.66	-3.21	-1.87
3	136152217	136152578	ENSG00000174579	0.047	-	136152217	136152578	0	1	361,	0	-2.52	-3.05	-1.86
3	194589619	194590260	ENSG00000231770	0.00074	+	194589619	194590260	0	2	7,406,	0,235	-6.37	-7.21	-1.85
3	121941011	121941492	ENSG00000163406	0.00022	+	121941011	121941492	0	1	481,	0	-7.53	-8.44	-1.84
3	38122709	38122920	ENSG00000060971	1.7e-05	-	38122709	38122920	0	1	211,	0	-9.96	-11	-1.84
3	63995734	63996453	ENSG00000163635	0.012	+	63995734	63996453	0	1	719,	0	-3.77	-4.43	-1.82
3	63995713	63996492	ENSG00000285258	0.0096	+	63995713	63996492	0	1	779,	0	-3.96	-4.65	-1.8
3	47590713	47590774	ENSG00000173473	0.052	-	47590713	47590774	0	1	61,	0	-2.44	-2.96	-1.8
3	121664426	121664517	ENSG00000173230	0.029	-	121664426	121664517	0	1	91,	0	-2.96	-3.54	-1.79
3	150742018	150742494	ENSG00000181788	2.5e-05	-	150742018	150742494	0	1	476,	0	-9.58	-10.6	-1.77
3	42635457	42637714	ENSG00000114857	1.9e-08	+	42635457	42637714	0	2	24,847,	0,1410	-16.6	-17.8	-1.74
3	184193861	184194012	ENSG00000161204	3.7e-06	+	184193861	184194012	0	1	151,	0	-11.4	-12.5	-1.72
3	47870889	47871100	ENSG00000047849	0.044	-	47870889	47871100	0	1	211,	0	-2.58	-3.12	-1.72
3	49721187	49721727	ENSG00000173540	1.2e-08	-	49721187	49721727	0	1	540,	0	-16.9	-18.2	-1.72
3	9758360	9758660	ENSG00000114026	0.18	+	9758360	9758660	0	1	300,	0	-1.34	-1.71	-1.71
3	100744922	100748368	ENSG00000114354	1.2e-05	+	100744922	100748368	0	3	9,41,220,	0,2491,3226	-10.2	-11.3	-1.71
3	38122674	38122945	ENSG00000008226	8.3e-06	+	38122674	38122945	0	1	271,	0	-10.6	-11.7	-1.7
3	56593730	56615290	ENSG00000180376	0.12	+	56593730	56615290	0	4	11,85,162,163,	0,213,19858,21397	-1.68	-2.11	-1.7
3	112580668	112581028	ENSG00000138459	0.11	+	112580668	112581028	0	1	360,	0	-1.75	-2.19	-1.7
3	53868559	53870038	ENSG00000113812	0.001	-	53868559	53870038	0	2	303,57,	0,1422	-6.09	-6.91	-1.69
3	56728346	56728797	ENSG00000163947	0.012	-	56728346	56728797	0	1	451,	0	-3.79	-4.46	-1.69
3	47590832	47610271	ENSG00000173473	0.027	-	47590832	47610271	0	2	5,206,	0,19233	-3.01	-3.6	-1.68
3	122359827	122365391	ENSG00000160124	0.00048	-	122359827	122365391	0	3	92,60,56,	0,3140,5508	-6.79	-7.65	-1.68
3	195868199	195868380	ENSG00000061938	0.007	-	195868199	195868380	0	1	181,	0	-4.26	-4.96	-1.67
3	4982865	4983765	ENSG00000134107	1.9e-14	+	4982865	4983765	0	1	900,	0	-30	-31.6	-1.66
3	49023049	49023317	ENSG00000178057	2.9e-21	+	49023049	49023317	0	1	268,	0	-45.4	-47.3	-1.66
3	50648069	50648250	ENSG00000114738	0.00091	+	50648069	50648250	0	1	181,	0	-6.17	-7	-1.66
3	156704738	156705008	ENSG00000163659	0.12	+	156704738	156705008	0	1	270,	0	-1.66	-2.08	-1.66
3	39143431	39143878	ENSG00000144655	0.14	-	39143431	39143878	0	1	447,	0	-1.55	-1.96	-1.66
3	52257088	52257328	ENSG00000164091	0.022	-	52257088	52257328	0	1	240,	0	-3.21	-3.82	-1.66
3	113005371	113005582	ENSG00000163608	0.024	-	113005371	113005582	0	1	211,	0	-3.13	-3.73	-1.66
3	42225589	42225799	ENSG00000182606	0.037	+	42225589	42225799	0	1	210,	0	-2.75	-3.31	-1.64
3	47410662	47411022	ENSG00000076201	0.027	+	47410662	47411022	0	1	360,	0	-3.02	-3.61	-1.6
3	136945742	136946280	ENSG00000158092	0.0024	+	136945742	136946280	0	1	538,	0	-5.27	-6.05	-1.6
3	194487930	194488199	ENSG00000233058	0.14	+	194487930	194488199	0	1	269,	0	-1.56	-1.97	-1.57
3	194652735	194653065	ENSG00000041802	0.12	-	194652735	194653065	0	1	330,	0	-1.69	-2.12	-1.57
3	101659983	101665310	ENSG00000066422	0.046	-	101659983	101665310	0	3	45,177,347,	0,4554,4980	-2.55	-3.08	-1.56
3	129384024	129384204	ENSG00000251474	0.08	-	129384024	129384204	0	1	180,	0	-2.05	-2.53	-1.56
3	56640093	56641641	ENSG00000163946	0.19	-	56640093	56641641	0	2	37,293,	0,1255	-1.3	-1.67	-1.55
3	47495848	47496088	ENSG00000163832	0.00012	-	47495848	47496088	0	1	240,	0	-8.06	-9	-1.54
3	52221080	52221410	ENSG00000173366	0.035	-	52221080	52221410	0	1	330,	0	-2.78	-3.34	-1.53
3	14668066	14671524	ENSG00000154781	2.8e-06	+	14668066	14671524	0	3	115,153,629,	0,1867,2829	-11.6	-12.8	-1.52
3	48158577	48158995	ENSG00000164045	0.028	-	48158577	48158995	0	1	418,	0	-3	-3.58	-1.52
3	186554302	186554631	ENSG00000113838	0.19	-	186554302	186554631	0	1	329,	0	-1.32	-1.68	-1.51
3	196937494	196937764	ENSG00000114503	0.0033	-	196937494	196937764	0	1	270,	0	-4.95	-5.71	-1.51
3	28324094	28324214	ENSG00000187118	0.11	+	28324094	28324214	0	1	120,	0	-1.75	-2.18	-1.5
3	134545660	134546445	ENSG00000182923	0.042	+	134545660	134546445	0	3	159,140,61,	0,488,724	-2.64	-3.18	-1.5
3	136947001	136948631	ENSG00000158092	0.0052	+	136947001	136948631	0	2	46,373,	0,1257	-4.53	-5.25	-1.5
3	25794114	25794534	ENSG00000151093	1.5e-08	+	25794114	25794534	0	1	420,	0	-16.7	-18	-1.48
3	25719242	25719453	ENSG00000151092	1.1e-06	-	25719242	25719453	0	1	211,	0	-12.5	-13.7	-1.48
3	49015487	49015548	ENSG00000178149	0.00031	-	49015487	49015548	0	1	61,	0	-7.18	-8.07	-1.48
3	52221079	52221410	ENSG00000239732	0.045	-	52221079	52221410	0	1	331,	0	-2.57	-3.11	-1.48
3	134547427	134551957	ENSG00000182923	0.024	+	134547427	134551957	0	4	45,115,198,32,	0,1634,2635,4498	-3.13	-3.73	-1.47
3	120602139	120602380	ENSG00000065518	3.1e-06	+	120602139	120602380	0	1	241,	0	-11.6	-12.7	-1.46
3	169778986	169779616	ENSG00000269984	0.06	-	169778986	169779616	0	1	630,	0	-2.3	-2.81	-1.46
3	180610021	180610621	ENSG00000163728	3.1e-07	+	180610021	180610621	0	1	600,	0	-13.8	-15	-1.44
3	28324059	28324239	ENSG00000163512	0.067	-	28324059	28324239	0	1	180,	0	-2.21	-2.71	-1.42
3	9702212	9702393	ENSG00000163719	1.5e-05	+	9702212	9702393	0	1	181,	0	-10.1	-11.1	-1.41
3	48268105	48268822	ENSG00000164048	4.7e-05	+	48268105	48268822	0	1	717,	0	-8.98	-9.96	-1.41
3	99848028	99848508	ENSG00000168386	0.17	-	99848028	99848508	0	1	480,	0	-1.37	-1.75	-1.4
3	196661733	196661914	ENSG00000174004	1.1e-05	+	196661733	196661914	0	1	181,	0	-10.3	-11.4	-1.39
3	32996846	32997116	ENSG00000170266	3.4e-05	-	32996846	32997116	0	1	270,	0	-9.3	-10.3	-1.39
3	52399675	52400491	ENSG00000114841	0.11	+	52399675	52400491	0	2	104,167,	0,649	-1.75	-2.19	-1.38
3	15042459	15042849	ENSG00000131368	1.5e-08	-	15042459	15042849	0	1	390,	0	-16.8	-18	-1.38
3	123931044	123948711	ENSG00000175455	3.1e-12	-	123931044	123948711	0	6	190,219,231,142,517,21,	0,263,2480,13804,15758,17646	-25	-26.5	-1.38
3	14141833	14142013	ENSG00000170876	0.0022	+	14141833	14142013	0	1	180,	0	-5.34	-6.11	-1.37
3	9734390	9739338	ENSG00000156983	0.038	+	9734390	9739338	0	2	349,340,	0,4608	-2.71	-3.26	-1.36
3	51393809	51394349	ENSG00000259956	2.5e-06	+	51393809	51394349	0	1	540,	0	-11.8	-12.9	-1.35
3	4316817	4317297	ENSG00000170364	0.013	+	4316817	4317297	0	1	480,	0	-3.72	-4.38	-1.33
3	11193438	11193702	ENSG00000285906	0.082	-	11193438	11193702	0	1	264,	0	-2.02	-2.5	-1.33
3	128813333	128813722	ENSG00000075785	3.2e-30	+	128813333	128813722	0	1	389,	0	-65.7	-67.9	-1.31
3	133587957	133588826	ENSG00000091527	4.5e-05	+	133587957	133588826	0	1	869,	0	-9.04	-10	-1.31
3	169779001	169780630	ENSG00000085274	0.083	+	169779001	169780630	0	2	560,41,	0,1588	-2.02	-2.49	-1.31
3	40538719	40539588	ENSG00000172888	0.011	+	40538719	40539588	0	1	869,	0	-3.83	-4.5	-1.3
3	15043557	15044456	ENSG00000177463	0.00017	+	15043557	15044456	0	1	899,	0	-7.77	-8.69	-1.28
3	167684339	167695722	ENSG00000114209	8.5e-05	-	167684339	167695722	0	4	50,102,79,127,	0,2875,3275,11256	-8.42	-9.37	-1.28
3	169992599	169993258	ENSG00000008952	6.1e-06	+	169992599	169993258	0	1	659,	0	-10.9	-12	-1.27
3	52249823	52250002	ENSG00000164088	0.067	+	52249823	52250002	0	1	179,	0	-2.21	-2.7	-1.25
3	56729125	56731636	ENSG00000163947	0.093	-	56729125	56731636	0	2	497,44,	0,2467	-1.91	-2.37	-1.25
3	133618333	133620295	ENSG00000163781	0.17	-	133618333	133620295	0	2	100,141,	0,1821	-1.4	-1.78	-1.25
3	48689603	48692997	ENSG00000068745	0.0022	-	48689603	48692997	0	3	110,176,44,	0,1703,3350	-5.33	-6.11	-1.24
3	9468537	9473505	ENSG00000168137	0.0062	+	9468537	9473505	0	3	38,471,270,	0,1921,4698	-4.38	-5.09	-1.23
3	14141816	14141935	ENSG00000268279	0.026	+	14141816	14141935	0	1	119,	0	-3.05	-3.65	-1.22
3	45918527	45919067	ENSG00000163820	0.056	-	45918527	45919067	0	1	540,	0	-2.37	-2.89	-1.22
3	49416774	49416955	ENSG00000145020	0.16	-	49416774	49416955	0	1	181,	0	-1.45	-1.84	-1.22
3	56633151	56633452	ENSG00000163946	0.1	-	56633151	56633452	0	1	301,	0	-1.84	-2.29	-1.22
3	31632943	31633182	ENSG00000163527	0.00046	+	31632943	31633182	0	1	239,	0	-6.82	-7.69	-1.21
3	47916326	47917045	ENSG00000047849	0.11	-	47916326	47917045	0	1	719,	0	-1.8	-2.25	-1.2
3	49416776	49416957	ENSG00000283189	0.17	-	49416776	49416957	0	1	181,	0	-1.41	-1.79	-1.2
3	122414250	122415541	ENSG00000196981	0.0039	-	122414250	122415541	0	1	1291,	0	-4.81	-5.55	-1.2
3	170128925	170129526	ENSG00000173889	0.15	-	170128925	170129526	0	1	601,	0	-1.48	-1.88	-1.18
3	160423593	160430652	ENSG00000113810	7.5e-06	+	160423593	160430652	0	6	57,80,153,127,190,54,	0,167,1273,2480,5159,7005	-10.8	-11.8	-1.17
3	50297090	50297840	ENSG00000243477	4.6e-07	-	50297090	50297840	0	1	750,	0	-13.4	-14.6	-1.17
3	129555174	129555415	ENSG00000004399	3.4e-05	-	129555174	129555415	0	1	241,	0	-9.26	-10.3	-1.17
3	133617159	133617309	ENSG00000163781	0.037	-	133617159	133617309	0	1	150,	0	-2.73	-3.29	-1.17
3	197511551	197512241	ENSG00000161267	4.1e-05	-	197511551	197512241	0	1	690,	0	-9.09	-10.1	-1.17
3	14142190	14142637	ENSG00000170876	0.0012	+	14142190	14142637	0	1	447,	0	-5.94	-6.76	-1.16
3	38253512	38253992	ENSG00000172939	0.1	+	38253512	38253992	0	1	480,	0	-1.84	-2.29	-1.16
3	46358669	46359297	ENSG00000121807	0.024	+	46358669	46359297	0	1	628,	0	-3.14	-3.74	-1.16
3	51704202	51704323	ENSG00000164081	0.00099	+	51704202	51704323	0	1	121,	0	-6.09	-6.92	-1.16
3	52524384	52524564	ENSG00000168268	0.00015	-	52524384	52524564	0	1	180,	0	-7.86	-8.79	-1.16
3	44926503	44926714	ENSG00000163812	0.00013	-	44926503	44926714	0	1	211,	0	-7.98	-8.92	-1.15
3	50358808	50359224	ENSG00000126062	0.016	-	50358808	50359224	0	1	416,	0	-3.5	-4.13	-1.14
3	157147782	157149042	ENSG00000163660	2.6e-16	-	157147782	157149042	0	2	807,94,	0,1166	-34.1	-35.9	-1.14
3	186789879	186790090	ENSG00000163918	0.0035	-	186789879	186790090	0	1	211,	0	-4.9	-5.65	-1.14
3	48269418	48270344	ENSG00000164048	3.4e-11	+	48269418	48270344	0	1	926,	0	-22.7	-24.1	-1.13
3	51989051	51989202	ENSG00000243989	1.4e-06	+	51989051	51989202	0	1	151,	0	-12.4	-13.5	-1.13
3	123271795	123272245	ENSG00000121542	0.07	+	123271795	123272245	0	1	450,	0	-2.17	-2.66	-1.13
3	56623067	56623787	ENSG00000163946	0.00032	-	56623067	56623787	0	1	720,	0	-7.15	-8.04	-1.13
3	15045382	15045743	ENSG00000177463	0.088	+	15045382	15045743	0	1	361,	0	-1.97	-2.43	-1.11
3	51989032	51989183	ENSG00000114786	6.8e-07	+	51989032	51989183	0	1	151,	0	-13.1	-14.2	-1.11
3	58171023	58171143	ENSG00000136068	0.061	+	58171023	58171143	0	1	120,	0	-2.29	-2.8	-1.11
3	53091600	53091931	ENSG00000163933	3.7e-06	-	53091600	53091931	0	1	331,	0	-11.4	-12.5	-1.11
3	44916035	44916395	ENSG00000163812	0.13	-	44916035	44916395	0	1	360,	0	-1.62	-2.04	-1.1
3	49316910	49318310	ENSG00000114316	0.081	-	49316910	49318310	0	2	568,2,	0,1398	-2.04	-2.51	-1.1
3	129847252	129847957	ENSG00000203644	0.077	-	129847252	129847957	0	1	705,	0	-2.08	-2.57	-1.1
3	58425198	58425378	ENSG00000168297	1.7e-08	+	58425198	58425378	0	1	180,	0	-16.6	-17.9	-1.09
3	49726982	49727431	ENSG00000176095	0.077	-	49726982	49727431	0	1	449,	0	-2.07	-2.56	-1.09
3	9365302	9374543	ENSG00000134077	0.11	+	9365302	9374543	0	4	18,78,477,28,	0,1605,5757,9213	-1.73	-2.17	-1.08
3	114085816	114086506	ENSG00000151576	0.17	+	114085816	114086506	0	1	690,	0	-1.37	-1.75	-1.08
3	13316773	13317134	ENSG00000132182	5.1e-13	-	13316773	13317134	0	1	361,	0	-26.8	-28.3	-1.08
3	142449294	142449595	ENSG00000175054	0.085	-	142449294	142449595	0	1	301,	0	-1.99	-2.46	-1.08
3	196830366	196830757	ENSG00000180370	0.0071	+	196830366	196830757	0	1	391,	0	-4.25	-4.95	-1.06
3	9445654	9447881	ENSG00000168137	0.17	+	9445654	9447881	0	3	86,258,196,	0,1395,2031	-1.4	-1.78	-1.05
3	14112637	14113051	ENSG00000163528	0.033	-	14112637	14113051	0	1	414,	0	-2.84	-3.41	-1.05
3	36990387	36992243	ENSG00000178567	0.17	-	36990387	36992243	0	2	48,363,	0,1493	-1.4	-1.78	-1.05
3	51957453	51957663	ENSG00000090097	0.031	-	51957453	51957663	0	1	210,	0	-2.9	-3.48	-1.05
3	52049725	52049875	ENSG00000164086	0.00058	-	52049725	52049875	0	1	150,	0	-6.6	-7.45	-1.05
3	50054277	50057880	ENSG00000004534	0.0043	+	50054277	50057880	0	2	118,153,	0,3450	-4.7	-5.44	-1.03
3	128480144	128480355	ENSG00000179348	0.021	-	128480144	128480355	0	1	211,	0	-3.24	-3.86	-1.03
3	172505896	172506885	ENSG00000121858	0.038	-	172505896	172506885	0	1	989,	0	-2.72	-3.28	-1.03
3	12583600	12584499	ENSG00000132155	4.7e-21	-	12583600	12584499	0	1	899,	0	-44.9	-46.8	-1.02
3	47016728	47046543	ENSG00000181555	8.3e-07	-	47016728	47046543	0	6	526,102,81,113,140,57,	0,909,3031,20936,25832,29758	-12.9	-14	-1.01
3	48294320	48294800	ENSG00000172113	0.018	-	48294320	48294800	0	1	480,	0	-3.36	-3.99	-1.01
3	16303445	16303625	ENSG00000154814	0.14	+	16303445	16303625	0	1	180,	0	-1.55	-1.96	-1
3	140973883	140976768	ENSG00000114120	0.025	+	140973883	140976768	0	2	122,509,	0,2376	-3.09	-3.68	-1
3	42637982	42643710	ENSG00000114857	2.5e-09	+	42637982	42643710	0	4	1768,96,57,59,	0,4518,5356,5669	-18.5	-19.8	-0.993
3	158096013	158096103	ENSG00000168779	0.11	-	158096013	158096103	0	1	90,	0	-1.81	-2.25	-0.993
3	49804346	49805030	ENSG00000185614	0.026	+	49804346	49805030	0	1	684,	0	-3.07	-3.66	-0.992
3	52075581	52096615	ENSG00000164087	0.0007	-	52075581	52096615	0	2	404,47,	0,20987	-6.43	-7.27	-0.99
3	64019016	64019424	ENSG00000163636	0.033	-	64019016	64019424	0	2	21,129,	0,279	-2.84	-3.41	-0.983
3	50354748	50355491	ENSG00000126062	2e-05	-	50354748	50355491	0	1	743,	0	-9.76	-10.8	-0.98
3	15669784	15670265	ENSG00000206560	0.019	-	15669784	15670265	0	1	481,	0	-3.32	-3.94	-0.96
3	49967401	49981580	ENSG00000004534	9.2e-08	+	49967401	49981580	0	4	1347,90,70,20,	0,4657,7921,14159	-15	-16.2	-0.942
3	196935879	196936269	ENSG00000114503	0.0029	-	196935879	196936269	0	1	390,	0	-5.09	-5.85	-0.94
3	49270932	49274104	ENSG00000188315	0.093	-	49270932	49274104	0	2	513,56,	0,3116	-1.91	-2.37	-0.939
3	75421761	75422511	ENSG00000244026	0.12	-	75421761	75422511	0	1	750,	0	-1.68	-2.1	-0.924
3	9475500	9476579	ENSG00000168137	9.2e-06	+	9475500	9476579	0	1	1079,	0	-10.6	-11.6	-0.923
3	126461382	126462040	ENSG00000070476	0.074	-	126461382	126462040	0	1	658,	0	-2.12	-2.61	-0.919
3	128081346	128081497	ENSG00000175792	0.11	-	128081346	128081497	0	1	151,	0	-1.74	-2.18	-0.914
3	101565007	101565787	ENSG00000174173	0.00058	+	101565007	101565787	0	1	780,	0	-6.6	-7.46	-0.911
3	45159773	45160060	ENSG00000224094	8.6e-18	-	45159773	45160060	0	1	287,	0	-37.5	-39.3	-0.908
3	28319516	28319756	ENSG00000187118	0.041	+	28319516	28319756	0	1	240,	0	-2.65	-3.2	-0.906
3	160430981	160432416	ENSG00000113810	0.00043	+	160430981	160432416	0	3	224,183,134,	0,661,1301	-6.88	-7.75	-0.897
3	12583532	12583713	ENSG00000075975	0.0073	+	12583532	12583713	0	1	181,	0	-4.23	-4.92	-0.896
3	58420903	58425049	ENSG00000168297	9.2e-09	+	58420903	58425049	0	3	57,34,298,	0,2557,3848	-17.2	-18.5	-0.892
3	49163276	49163959	ENSG00000177352	0.0049	-	49163276	49163959	0	1	683,	0	-4.58	-5.31	-0.879
3	52694487	52694875	ENSG00000016864	0.0015	-	52694487	52694875	0	1	388,	0	-5.7	-6.5	-0.879
3	49006853	49007154	ENSG00000178467	0.015	+	49006853	49007154	0	1	301,	0	-3.54	-4.18	-0.876
3	101565906	101566027	ENSG00000174173	0.18	+	101565906	101566027	0	1	121,	0	-1.35	-1.72	-0.868
3	194641415	194644579	ENSG00000041802	0.019	-	194641415	194644579	0	2	832,7,	0,3157	-3.36	-3.98	-0.846
3	9893695	9893874	ENSG00000171135	0.0029	+	9893695	9893874	0	1	179,	0	-5.06	-5.83	-0.844
3	18348536	18349736	ENSG00000182568	1e-09	-	18348536	18349736	0	1	1200,	0	-19.4	-20.7	-0.836
3	47083719	47084350	ENSG00000181555	0.11	-	47083719	47084350	0	1	631,	0	-1.8	-2.25	-0.835
3	195068696	195069863	ENSG00000173950	0.017	-	195068696	195069863	0	1	1167,	0	-3.46	-4.1	-0.832
3	49277830	49278401	ENSG00000114316	0.034	-	49277830	49278401	0	1	571,	0	-2.81	-3.37	-0.802
3	150568252	150584062	ENSG00000144895	4.7e-17	+	150568252	150584062	0	6	40,572,114,129,66,217,	0,3705,7396,13365,14947,15593	-35.8	-37.6	-0.795
3	129433855	129437741	ENSG00000129071	0.00088	-	129433855	129437741	0	3	281,866,22,	0,2587,3864	-6.2	-7.04	-0.781
3	185645326	185646883	ENSG00000073792	0.024	-	185645326	185646883	0	2	297,4,	0,1553	-3.11	-3.71	-0.78
3	51392673	51393751	ENSG00000259956	0.0038	+	51392673	51393751	0	1	1078,	0	-4.84	-5.58	-0.765
3	41239698	41240029	ENSG00000168036	0.00054	+	41239698	41240029	0	1	331,	0	-6.67	-7.53	-0.745
3	127660438	127661068	ENSG00000114631	0.0068	+	127660438	127661068	0	1	630,	0	-4.28	-4.99	-0.742
3	139356953	139357074	ENSG00000175110	0.18	+	139356953	139357074	0	1	121,	0	-1.33	-1.7	-0.727
3	157149251	157149730	ENSG00000163660	0.029	-	157149251	157149730	0	2	134,287,	0,192	-2.96	-3.54	-0.727
3	123914612	123930895	ENSG00000175455	9.2e-06	-	123914612	123930895	0	2	1106,124,	0,16159	-10.5	-11.6	-0.699
3	122740151	122741205	ENSG00000169087	0.049	-	122740151	122741205	0	2	724,203,	0,851	-2.49	-3.01	-0.698
3	134478511	134482836	ENSG00000129055	0.12	-	134478511	134482836	0	2	204,95,	0,4230	-1.71	-2.14	-0.692
3	9829342	9835401	ENSG00000250151	5.7e-13	+	9829342	9835401	0	2	53,721,	0,5338	-26.7	-28.2	-0.683
3	14156408	14158703	ENSG00000154767	0.13	-	14156408	14158703	0	2	87,693,	0,1602	-1.65	-2.07	-0.682
3	128480533	128481162	ENSG00000179348	0.025	-	128480533	128481162	0	1	629,	0	-3.1	-3.7	-0.675
3	128070486	128070726	ENSG00000058262	0.0016	+	128070486	128070726	0	1	240,	0	-5.64	-6.44	-0.656
3	64010548	64010728	ENSG00000163636	0.054	-	64010548	64010728	0	1	180,	0	-2.4	-2.92	-0.646
3	46360688	46360928	ENSG00000121807	0.045	+	46360688	46360928	0	1	240,	0	-2.57	-3.11	-0.633
3	168010205	168032531	ENSG00000173905	0.16	-	168010205	168032531	0	8	213,81,69,168,110,80,257,12,	0,537,14320,14722,17522,19017,19574,22314	-1.47	-1.86	-0.633
3	32769933	32773725	ENSG00000182973	0.039	+	32769933	32773725	0	2	31,269,	0,3523	-2.69	-3.24	-0.627
3	141926008	141926217	ENSG00000069849	0.084	+	141926008	141926217	0	1	209,	0	-2	-2.48	-0.619
3	180976216	180976577	ENSG00000114416	0.0018	+	180976216	180976577	0	1	361,	0	-5.52	-6.31	-0.619
3	51993581	51993731	ENSG00000162244	9.3e-12	-	51993581	51993731	0	1	150,	0	-24	-25.4	-0.613
3	112537764	112550254	ENSG00000144848	0.02	-	112537764	112550254	0	6	126,199,82,112,108,63,	0,381,4038,6230,10768,12427	-3.28	-3.9	-0.612
3	88156155	88156965	ENSG00000179021	0.16	+	88156155	88156965	0	1	810,	0	-1.46	-1.84	-0.609
3	184321404	184322563	ENSG00000114867	0.0043	+	184321404	184322563	0	3	699,89,20,	0,957,1139	-4.71	-5.44	-0.6
3	50607087	50607925	ENSG00000114737	1.5e-08	-	50607087	50607925	0	1	838,	0	-16.7	-18	-0.598
3	194587672	194588448	ENSG00000145014	0.093	-	194587672	194588448	0	1	776,	0	-1.91	-2.37	-0.597
3	122338177	122341704	ENSG00000121552	1.9e-18	+	122338177	122341704	0	2	93,266,	0,3261	-38.9	-40.8	-0.568
3	184710782	184711586	ENSG00000177383	0.0093	-	184710782	184711586	0	1	804,	0	-3.99	-4.68	-0.55
3	52693518	52694343	ENSG00000163938	0.00048	+	52693518	52694343	0	4	26,176,67,151,	0,113,518,674	-6.77	-7.64	-0.548
3	58409589	58413042	ENSG00000168297	0.077	+	58409589	58413042	0	3	29,70,142,	0,500,3311	-2.09	-2.57	-0.548
3	129169483	129169958	ENSG00000169714	2.5e-09	-	129169483	129169958	0	1	475,	0	-18.5	-19.8	-0.541
3	48467137	48467645	ENSG00000164053	0.019	+	48467137	48467645	0	1	508,	0	-3.32	-3.94	-0.53
3	48467110	48467645	ENSG00000213689	0.017	+	48467110	48467645	0	1	535,	0	-3.42	-4.05	-0.53
3	100178441	100178621	ENSG00000184220	0.18	+	100178441	100178621	0	1	180,	0	-1.34	-1.71	-0.518
3	128070097	128070367	ENSG00000058262	0.093	+	128070097	128070367	0	1	270,	0	-1.91	-2.37	-0.514
3	128910801	128914637	ENSG00000177646	0.013	+	128910801	128914637	0	3	12,608,8,	0,1705,3828	-3.67	-4.33	-0.495
3	50258874	50259115	ENSG00000114353	0.00076	+	50258874	50259115	0	1	241,	0	-6.34	-7.18	-0.487
3	9834707	9854629	ENSG00000214021	2.5e-07	+	9834707	9854629	0	2	1608,71,	0,19851	-14	-15.2	-0.476
3	186583870	186597103	ENSG00000283149	0.056	+	186583870	186597103	0	4	106,160,38,50,	0,559,1473,13183	-2.37	-2.89	-0.45
3	129555474	129556711	ENSG00000004399	1.5e-05	-	129555474	129556711	0	2	954,95,	0,1142	-10.1	-11.1	-0.445
3	136329942	136333443	ENSG00000114054	0.06	+	136329942	136333443	0	2	228,42,	0,3459	-2.31	-2.82	-0.397
3	121644767	121653659	ENSG00000180353	0.11	-	121644767	121653659	0	3	161,164,95,	0,2551,8797	-1.78	-2.22	-0.396
3	196936567	196937196	ENSG00000114503	0.089	-	196936567	196937196	0	1	629,	0	-1.95	-2.42	-0.383
3	143038937	143056471	ENSG00000163714	0.057	+	143038937	143056471	0	6	23,160,111,119,177,160,	0,4179,12001,14738,16005,17374	-2.36	-2.87	-0.373
3	14198198	14198407	ENSG00000170860	0.085	+	14198198	14198407	0	1	209,	0	-1.99	-2.46	-0.371
3	186583876	186585800	ENSG00000090520	0.077	+	186583876	186585800	0	3	100,160,457,	0,553,1467	-2.08	-2.57	-0.347
3	184144913	184145333	ENSG00000145191	0.15	+	184144913	184145333	0	1	420,	0	-1.51	-1.9	-0.342
3	101576488	101576747	ENSG00000242299	5.6e-06	-	101576488	101576747	0	1	259,	0	-11.1	-12.1	-0.325
3	158096819	158098103	ENSG00000168779	0.023	-	158096819	158098103	0	1	1284,	0	-3.19	-3.79	-0.261
3	185643738	185644728	ENSG00000073792	0.14	-	185643738	185644728	0	1	990,	0	-1.54	-1.95	-0.251
3	49015637	49015937	ENSG00000178149	0.12	-	49015637	49015937	0	1	300,	0	-1.66	-2.08	-0.219
3	197954355	197955893	ENSG00000182899	0.069	+	197954355	197955893	0	2	96,144,	0,1394	-2.18	-2.67	-0.207
3	196942859	196943540	ENSG00000270170	0.075	+	196942859	196943540	0	1	681,	0	-2.11	-2.59	-0.189
3	40461938	40462388	ENSG00000188846	0.15	+	40461938	40462388	0	1	450,	0	-1.53	-1.93	0.0706
3	179588820	179601766	ENSG00000136522	0.14	-	179588820	179601766	0	5	175,96,131,97,37,	0,3823,4944,9854,12909	-1.56	-1.97	0.239
3	49101619	49102652	ENSG00000172053	0.17	-	49101619	49102652	0	5	86,72,61,54,58,	0,208,585,799,975	-1.38	-1.76	0.302
3	49357170	49357231	ENSG00000233276	0.001	-	49357170	49357231	0	1	61,	0	-6.08	-6.91	0.319
3	50115364	50116053	ENSG00000003756	0.18	+	50115364	50116053	0	2	243,148,	0,541	-1.34	-1.71	0.327
3	183829359	183829569	ENSG00000175193	0.15	-	183829359	183829569	0	1	210,	0	-1.5	-1.9	0.346
3	47413693	47413933	ENSG00000114650	0.089	-	47413693	47413933	0	1	240,	0	-1.96	-2.42	0.37
3	49026760	49027781	ENSG00000178035	0.0085	-	49026760	49027781	0	2	287,72,	0,949	-4.08	-4.77	0.414
3	101681090	101681359	ENSG00000114391	1.4e-13	-	101681090	101681359	0	1	269,	0	-28	-29.6	0.419
3	161251816	161252026	ENSG00000169251	0.12	+	161251816	161252026	0	1	210,	0	-1.72	-2.15	0.428
3	50117004	50117392	ENSG00000235016	0.11	-	50117004	50117392	0	1	388,	0	-1.78	-2.23	0.445
3	52687745	52690758	ENSG00000163938	0.12	+	52687745	52690758	0	4	82,98,282,167,	0,363,1179,2846	-1.67	-2.09	0.447
3	13316234	13316385	ENSG00000132182	0.016	-	13316234	13316385	0	1	151,	0	-3.52	-4.16	0.465
3	15052174	15053341	ENSG00000131368	0.0031	-	15052174	15053341	0	2	459,51,	0,1116	-5.02	-5.78	0.477
3	52211303	52211423	ENSG00000023330	0.059	+	52211303	52211423	0	1	120,	0	-2.32	-2.83	0.49
3	50061994	50077229	ENSG00000004534	1.5e-05	+	50061994	50077229	0	8	114,96,54,261,75,98,158,222,	0,3036,3584,4247,6695,8460,13178,15013	-10	-11.1	0.499
3	45547593	45548253	ENSG00000011376	0.15	+	45547593	45548253	0	1	660,	0	-1.53	-1.93	0.508
3	51398796	51413026	ENSG00000145041	0.14	-	51398796	51413026	0	4	31,253,102,34,	0,4346,13582,14196	-1.56	-1.96	0.562
3	153163646	153164096	ENSG00000181467	0.13	+	153163646	153164096	0	1	450,	0	-1.65	-2.07	0.563
3	50116634	50118482	ENSG00000003756	0.0025	+	50116634	50118482	0	3	83,306,152,	0,439,1696	-5.22	-5.99	0.62
3	124737653	124738313	ENSG00000114491	0.081	+	124737653	124738313	0	1	660,	0	-2.04	-2.51	0.682
3	195863363	195863783	ENSG00000061938	0.0011	-	195863363	195863783	0	1	420,	0	-5.99	-6.81	0.697
3	53225606	53225877	ENSG00000163931	6.3e-14	-	53225606	53225877	0	1	271,	0	-28.8	-30.4	0.716
3	158100300	158102846	ENSG00000168779	0.046	-	158100300	158102846	0	2	11,169,	0,2377	-2.54	-3.08	0.716
3	48440526	48440706	ENSG00000232112	0.00031	+	48440526	48440706	0	1	180,	0	-7.19	-8.08	0.871
3	49015233	49015564	ENSG00000178252	4.2e-13	+	49015233	49015564	0	1	331,	0	-26.9	-28.5	0.921
3	48440497	48440702	ENSG00000244380	4.5e-05	-	48440497	48440702	0	1	205,	0	-9.05	-10	0.931
3	46923578	46923789	ENSG00000160799	0.18	-	46923578	46923789	0	1	211,	0	-1.36	-1.73	0.969
3	184326611	184327364	ENSG00000114867	2.3e-05	+	184326611	184327364	0	3	18,103,149,	0,269,604	-9.72	-10.7	0.989
3	153162897	153163377	ENSG00000181467	0.029	+	153162897	153163377	0	1	480,	0	-2.95	-3.53	0.994
3	100172270	100176313	ENSG00000184220	0.15	+	100172270	100176313	0	2	134,76,	0,3967	-1.49	-1.89	1.01
3	50118344	50136473	ENSG00000235016	0.017	-	50118344	50136473	0	3	98,64,17,	0,4180,18112	-3.45	-4.08	1.06
3	58431737	58431887	ENSG00000168291	0.16	-	58431737	58431887	0	1	150,	0	-1.44	-1.83	1.13
3	129315183	129315509	ENSG00000184897	3.4e-13	-	129315183	129315509	0	1	326,	0	-27.2	-28.7	1.16
3	128100690	128112952	ENSG00000175792	1.5e-05	-	128100690	128112952	0	4	54,90,152,65,	0,868,4082,12197	-10.1	-11.1	1.25
3	46940972	46966070	ENSG00000160799	0.13	-	46940972	46966070	0	2	93,87,	0,25011	-1.65	-2.06	1.3
3	185292201	185292502	ENSG00000073803	0.0043	+	185292201	185292502	0	1	301,	0	-4.7	-5.44	1.34
3	9784196	9787475	ENSG00000171148	1.4e-08	-	9784196	9787475	0	4	17,110,104,277,	0,1119,2809,3002	-16.8	-18.1	1.38
3	133819842	133819933	ENSG00000144867	0.0093	+	133819842	133819933	0	1	91,	0	-3.99	-4.68	1.4
3	66377977	66378068	ENSG00000144741	0.079	+	66377977	66378068	0	1	91,	0	-2.06	-2.54	1.56
3	48465496	48465676	ENSG00000164053	0.0016	+	48465496	48465676	0	1	180,	0	-5.61	-6.41	2.1
3	50236290	50238159	ENSG00000114353	0.0027	+	50236290	50238159	0	2	163,48,	0,1821	-5.14	-5.91	2.95
4	119031714	119031955	ENSG00000172403	0.027	+	119031714	119031955	0	1	241,	0	-3.03	-3.61	-4.43
4	173145108	173145436	ENSG00000245213	0.096	-	173145108	173145436	0	1	328,	0	-1.88	-2.34	-3.71
4	128121934	128122234	ENSG00000138709	0.025	+	128121934	128122234	0	1	300,	0	-3.09	-3.69	-3.68
4	78911501	78912191	ENSG00000163291	0.044	-	78911501	78912191	0	1	690,	0	-2.58	-3.12	-3.64
4	78911492	78912182	ENSG00000138756	0.047	+	78911492	78912182	0	1	690,	0	-2.52	-3.05	-3.6
4	110050809	110050989	ENSG00000170522	0.031	-	110050809	110050989	0	1	180,	0	-2.89	-3.47	-3.5
4	185190770	185191040	ENSG00000164323	0.066	-	185190770	185191040	0	1	270,	0	-2.22	-2.72	-3.39
4	119030065	119030456	ENSG00000172403	0.012	+	119030065	119030456	0	1	391,	0	-3.79	-4.46	-3.31
4	119030965	119031236	ENSG00000172403	0.012	+	119030965	119031236	0	1	271,	0	-3.76	-4.42	-3.25
4	75527080	75527321	ENSG00000174796	0.16	+	75527080	75527321	0	1	241,	0	-1.45	-1.83	-2.96
4	173248190	173248370	ENSG00000109586	0.13	+	173248190	173248370	0	1	180,	0	-1.63	-2.05	-2.93
4	177353435	177353794	ENSG00000109674	1.1e-08	+	177353435	177353794	0	1	359,	0	-17	-18.3	-2.88
4	154535871	154536022	ENSG00000171566	0.044	-	154535871	154536022	0	1	151,	0	-2.59	-3.13	-2.81
4	128519095	128519394	ENSG00000251432	0.016	+	128519095	128519394	0	1	299,	0	-3.5	-4.14	-2.76
4	38967249	38967459	ENSG00000121895	0.045	-	38967249	38967459	0	1	210,	0	-2.57	-3.11	-2.56
4	39477068	39477308	ENSG00000121897	7.7e-05	+	39477068	39477308	0	1	240,	0	-8.51	-9.47	-2.53
4	55904495	55904556	ENSG00000090989	0.003	+	55904495	55904556	0	1	61,	0	-5.04	-5.8	-2.42
4	139718280	139718880	ENSG00000196782	0.15	-	139718280	139718880	0	1	600,	0	-1.53	-1.93	-2.39
4	184388131	184388252	ENSG00000168310	0.00016	-	184388131	184388252	0	1	121,	0	-7.79	-8.71	-2.33
4	88521634	88521695	ENSG00000145337	0.00075	-	88521634	88521695	0	1	61,	0	-6.37	-7.2	-2.32
4	24576330	24576570	ENSG00000109606	0.0011	-	24576330	24576570	0	1	240,	0	-6.02	-6.84	-2.17
4	87047281	87047581	ENSG00000172493	0.18	+	87047281	87047581	0	1	300,	0	-1.35	-1.72	-2.15
4	27022659	27023108	ENSG00000109689	0.0032	+	27022659	27023108	0	1	449,	0	-5	-5.75	-2.12
4	1251577	1251937	ENSG00000196810	0.0019	+	1251577	1251937	0	1	360,	0	-5.48	-6.26	-2.11
4	127886220	127891031	ENSG00000142731	0.0014	+	127886220	127891031	0	4	508,163,371,35,	0,1113,3645,4776	-5.76	-6.57	-2.09
4	88521572	88521735	ENSG00000255072	0.00038	-	88521572	88521735	0	1	163,	0	-6.99	-7.87	-2.09
4	82842246	82842397	ENSG00000138674	0.001	-	82842246	82842397	0	1	151,	0	-6.06	-6.88	-2.07
4	129112113	129112414	ENSG00000151470	0.027	+	129112113	129112414	0	1	301,	0	-3.03	-3.62	-1.88
4	153636381	153636711	ENSG00000121210	8.3e-07	+	153636381	153636711	0	1	330,	0	-12.9	-14	-1.8
4	15853109	15853230	ENSG00000004468	0.1	+	15853109	15853230	0	1	121,	0	-1.81	-2.26	-1.72
4	158651965	158652385	ENSG00000171509	3.1e-07	+	158651965	158652385	0	1	420,	0	-13.8	-15	-1.72
4	118281775	118281956	ENSG00000164099	0.094	-	118281775	118281956	0	1	181,	0	-1.9	-2.36	-1.66
4	153704112	153704563	ENSG00000137462	8.2e-05	+	153704112	153704563	0	1	451,	0	-8.46	-9.41	-1.61
4	26430818	26431418	ENSG00000168214	1.1e-07	+	26430818	26431418	0	1	600,	0	-14.8	-16	-1.59
4	80203069	80203879	ENSG00000152784	0.00017	+	80203069	80203879	0	1	810,	0	-7.77	-8.69	-1.59
4	6621474	6622433	ENSG00000013288	3.4e-09	+	6621474	6622433	0	1	959,	0	-18.1	-19.5	-1.56
4	183646530	183651068	ENSG00000182552	0.0078	-	183646530	183651068	0	3	7,118,85,	0,2920,4453	-4.16	-4.85	-1.56
4	2513706	2513946	ENSG00000063978	0.05	+	2513706	2513946	0	1	240,	0	-2.47	-3	-1.55
4	55370169	55370558	ENSG00000128039	0.014	+	55370169	55370558	0	1	389,	0	-3.6	-4.25	-1.52
4	127920306	127920696	ENSG00000164073	0.1	-	127920306	127920696	0	1	390,	0	-1.84	-2.28	-1.5
4	87336609	87336758	ENSG00000198189	3.4e-12	-	87336609	87336758	0	1	149,	0	-24.9	-26.4	-1.48
4	765062	766539	ENSG00000185619	0.00014	+	765062	766539	0	2	2,508,	0,969	-7.94	-8.87	-1.47
4	958505	958656	ENSG00000127419	0.0048	+	958505	958656	0	1	151,	0	-4.61	-5.34	-1.47
4	1978850	1979181	ENSG00000109685	0.0012	+	1978850	1979181	0	1	331,	0	-5.94	-6.75	-1.47
4	128077847	128091134	ENSG00000138709	0.14	+	128077847	128091134	0	3	115,141,134,	0,4317,13153	-1.56	-1.96	-1.47
4	105682626	105682897	ENSG00000138785	0.014	-	105682626	105682897	0	1	271,	0	-3.61	-4.26	-1.47
4	153703123	153703334	ENSG00000137462	0.067	+	153703123	153703334	0	1	211,	0	-2.21	-2.71	-1.46
4	139058597	139059346	ENSG00000109381	0.0024	-	139058597	139059346	0	1	749,	0	-5.27	-6.04	-1.46
4	7030490	7030700	ENSG00000132405	0.019	+	7030490	7030700	0	1	210,	0	-3.32	-3.94	-1.44
4	15686429	15686579	ENSG00000237765	0.084	+	15686429	15686579	0	1	150,	0	-2.01	-2.48	-1.44
4	106348775	106349226	ENSG00000164022	0.033	+	106348775	106349226	0	1	451,	0	-2.85	-3.42	-1.44
4	2829623	2830133	ENSG00000087266	2.5e-07	+	2829623	2830133	0	1	510,	0	-14	-15.2	-1.41
4	73098177	73098358	ENSG00000132466	0.17	-	73098177	73098358	0	1	181,	0	-1.39	-1.77	-1.41
4	2935497	2935768	ENSG00000249673	0.19	+	2935497	2935768	0	1	271,	0	-1.31	-1.67	-1.4
4	118710968	118711268	ENSG00000145388	0.024	+	118710968	118711268	0	1	300,	0	-3.13	-3.74	-1.4
4	152626834	152627583	ENSG00000170006	4.1e-05	-	152626834	152627583	0	1	749,	0	-9.12	-10.1	-1.34
4	79905555	79907235	ENSG00000163297	1.1e-10	-	79905555	79907235	0	1	1680,	0	-21.5	-22.9	-1.33
4	165079440	165079740	ENSG00000170088	0.081	-	165079440	165079740	0	1	300,	0	-2.03	-2.51	-1.33
4	112431932	112439740	ENSG00000073331	0.0007	+	112431932	112439740	0	4	649,154,163,55,	0,3215,6551,7753	-6.43	-7.27	-1.31
4	139044657	139045522	ENSG00000151014	0.0009	+	139044657	139045522	0	1	865,	0	-6.18	-7.01	-1.31
4	165321367	165322352	ENSG00000109466	0.044	+	165321367	165322352	0	2	8,321,	0,664	-2.59	-3.13	-1.29
4	168357572	168357813	ENSG00000181381	0.026	-	168357572	168357813	0	1	241,	0	-3.05	-3.64	-1.29
4	1983342	1983615	ENSG00000185049	0.012	-	1983342	1983615	0	2	161,20,	0,253	-3.76	-4.43	-1.24
4	53459300	53459541	ENSG00000072201	0.1	-	53459300	53459541	0	1	241,	0	-1.81	-2.26	-1.23
4	4419443	4420163	ENSG00000168818	2.1e-08	-	4419443	4420163	0	1	720,	0	-16.4	-17.7	-1.2
4	73090884	73091214	ENSG00000132466	0.031	-	73090884	73091214	0	1	330,	0	-2.91	-3.48	-1.19
4	48498918	48500047	ENSG00000075539	0.0097	-	48498918	48500047	0	2	762,18,	0,1111	-3.96	-4.64	-1.18
4	10075088	10075328	ENSG00000071127	4.2e-12	-	10075088	10075328	0	1	240,	0	-24.7	-26.2	-1.17
4	168357003	168357274	ENSG00000181381	0.001	-	168357003	168357274	0	1	271,	0	-6.08	-6.9	-1.17
4	165341758	165342147	ENSG00000052802	0.0089	+	165341758	165342147	0	1	389,	0	-4.03	-4.72	-1.15
4	16162723	16163414	ENSG00000169762	0.00053	-	16162723	16163414	0	1	691,	0	-6.7	-7.55	-1.15
4	39837833	39842053	ENSG00000121892	0.0039	-	39837833	39842053	0	2	375,106,	0,4114	-4.8	-5.54	-1.14
4	87108191	87126300	ENSG00000172493	0.13	+	87108191	87126300	0	4	124,933,241,202,	0,6175,16845,17907	-1.62	-2.03	-1.11
4	7060904	7061352	ENSG00000109519	3.7e-08	-	7060904	7061352	0	1	448,	0	-15.9	-17.1	-1.11
4	57031069	57031278	ENSG00000163453	1.2e-07	-	57031069	57031278	0	1	209,	0	-14.7	-15.9	-1.11
4	7030553	7030703	ENSG00000245748	0.18	-	7030553	7030703	0	1	150,	0	-1.36	-1.73	-1.1
4	53453023	53459542	ENSG00000145216	0.00027	+	53453023	53459542	0	3	119,240,241,	0,5527,6278	-7.32	-8.22	-1.07
4	17623811	17623992	ENSG00000118579	0.0037	+	17623811	17623992	0	1	181,	0	-4.86	-5.61	-1.03
4	7060038	7060189	ENSG00000109519	0.018	-	7060038	7060189	0	1	151,	0	-3.4	-4.03	-1.03
4	94284973	94289856	ENSG00000163104	0.046	+	94284973	94289856	0	2	96,384,	0,4499	-2.54	-3.07	-1.02
4	82893606	82894773	ENSG00000251022	1.7e-11	-	82893606	82894773	0	1	1167,	0	-23.3	-24.8	-1.02
4	68316285	68318835	ENSG00000083896	0.028	-	68316285	68318835	0	4	163,63,64,10,	0,2233,2404,2540	-3	-3.58	-1
4	1715951	1716132	ENSG00000168936	0.13	-	1715951	1716132	0	1	181,	0	-1.63	-2.04	-0.989
4	76115195	76115406	ENSG00000138750	0.071	-	76115195	76115406	0	1	211,	0	-2.15	-2.64	-0.981
4	75801095	75813357	ENSG00000138768	6.3e-05	+	75801095	75813357	0	8	105,139,295,87,99,108,216,152,	0,3038,3913,5390,7857,9336,11064,12110	-8.7	-9.67	-0.953
4	6707700	6708119	ENSG00000178988	1.1e-05	-	6707700	6708119	0	1	419,	0	-10.3	-11.4	-0.909
4	145137165	145138545	ENSG00000164164	0.027	-	145137165	145138545	0	1	1380,	0	-3.03	-3.62	-0.908
4	119298486	119298547	ENSG00000164096	0.13	-	119298486	119298547	0	1	61,	0	-1.62	-2.04	-0.907
4	87160699	87161148	ENSG00000145332	0.069	-	87160699	87161148	0	1	449,	0	-2.18	-2.68	-0.888
4	112277743	112278282	ENSG00000145365	0.021	-	112277743	112278282	0	1	539,	0	-3.25	-3.86	-0.879
4	8475966	8476566	ENSG00000155275	0.13	+	8475966	8476566	0	1	600,	0	-1.65	-2.07	-0.875
4	6708416	6708805	ENSG00000178988	0.025	-	6708416	6708805	0	1	389,	0	-3.09	-3.69	-0.875
4	108034304	108034515	ENSG00000138796	0.0067	+	108034304	108034515	0	1	211,	0	-4.3	-5.01	-0.847
4	112646912	112650501	ENSG00000174720	0.0016	+	112646912	112650501	0	6	43,94,351,184,152,41,	0,121,286,738,2622,3548	-5.65	-6.45	-0.824
4	102631458	102632208	ENSG00000109323	6.8e-05	-	102631458	102632208	0	1	750,	0	-8.63	-9.6	-0.766
4	102796959	102798936	ENSG00000109332	1.5e-06	-	102796959	102798936	0	2	501,9,	0,1968	-12.3	-13.4	-0.757
4	183506301	183511066	ENSG00000168556	0.06	+	183506301	183511066	0	2	17,785,	0,3980	-2.31	-2.82	-0.702
4	103108831	103116453	ENSG00000138778	0.16	-	103108831	103116453	0	4	258,184,98,90,	0,1996,5623,7532	-1.47	-1.86	-0.697
4	103106015	103106256	ENSG00000138778	0.19	-	103106015	103106256	0	1	241,	0	-1.31	-1.67	-0.682
4	6675285	6676065	ENSG00000170846	0.0088	+	6675285	6676065	0	1	780,	0	-4.05	-4.73	-0.669
4	87449193	87458264	ENSG00000170502	0.16	+	87449193	87458264	0	4	60,147,86,422,	0,2395,5177,8649	-1.46	-1.85	-0.665
4	183446556	183447601	ENSG00000168564	0.038	+	183446556	183447601	0	1	1045,	0	-2.71	-3.27	-0.665
4	118710159	118710759	ENSG00000145388	0.15	+	118710159	118710759	0	1	600,	0	-1.51	-1.9	-0.645
4	103140275	103145701	ENSG00000138778	0.18	-	103140275	103145701	0	7	139,291,159,159,288,285,179,	0,538,1474,2972,4055,4774,5247	-1.34	-1.7	-0.639
4	108667280	108667820	ENSG00000198856	2.5e-05	+	108667280	108667820	0	1	540,	0	-9.6	-10.6	-0.637
4	82355313	82355524	ENSG00000138668	0.045	-	82355313	82355524	0	1	211,	0	-2.56	-3.1	-0.617
4	38133054	38137560	ENSG00000065882	0.0007	+	38133054	38137560	0	2	203,426,	0,4080	-6.43	-7.27	-0.598
4	56973947	56976697	ENSG00000084092	0.19	-	56973947	56976697	0	2	75,256,	0,2494	-1.31	-1.67	-0.597
4	106347576	106347787	ENSG00000164022	0.097	+	106347576	106347787	0	1	211,	0	-1.88	-2.33	-0.587
4	57023341	57023492	ENSG00000047315	0.16	+	57023341	57023492	0	1	151,	0	-1.44	-1.83	-0.522
4	139388859	139389279	ENSG00000164134	0.084	+	139388859	139389279	0	1	420,	0	-2	-2.48	-0.511
4	2930560	2930680	ENSG00000109736	0.0059	-	2930560	2930680	0	1	120,	0	-4.41	-5.13	-0.498
4	153362987	153415088	ENSG00000121211	0.036	+	153362987	153415088	0	5	38,75,115,175,338,	0,31274,34231,45983,51763	-2.77	-3.33	-0.458
4	6716533	6717402	ENSG00000186222	0.0033	+	6716533	6717402	0	1	869,	0	-4.95	-5.7	-0.439
4	56500481	56502067	ENSG00000174780	0.058	+	56500481	56502067	0	2	214,384,	0,1202	-2.33	-2.84	-0.405
4	121816308	121817021	ENSG00000123737	0.16	+	121816308	121817021	0	2	139,250,	0,463	-1.45	-1.83	-0.368
4	153704922	153705462	ENSG00000137462	0.15	+	153704922	153705462	0	1	540,	0	-1.5	-1.9	-0.345
4	56459487	56460087	ENSG00000128050	0.055	+	56459487	56460087	0	1	600,	0	-2.38	-2.9	-0.314
4	82425974	82428043	ENSG00000152795	0.031	-	82425974	82428043	0	5	155,171,115,132,26,	0,488,1215,1458,2043	-2.89	-3.46	-0.23
4	173331903	173332381	ENSG00000164104	0.012	-	173331903	173332381	0	1	478,	0	-3.74	-4.4	-0.23
4	108623261	108625470	ENSG00000109475	0.0037	+	108623261	108625470	0	3	71,128,40,	0,1866,2169	-4.86	-5.6	-0.172
4	3512516	3515963	ENSG00000163956	0.0048	-	3512516	3515963	0	3	520,177,82,	0,2235,3365	-4.6	-5.33	0.209
4	151104170	151104652	ENSG00000145425	0.022	+	151104170	151104652	0	2	116,181,	0,301	-3.21	-3.82	0.339
4	6640895	6641284	ENSG00000179010	0.016	+	6640895	6641284	0	1	389,	0	-3.48	-4.12	0.393
4	82358636	82373671	ENSG00000138668	4.7e-05	-	82358636	82373671	0	5	206,169,57,32,226,	0,834,12891,14482,14809	-8.98	-9.96	0.421
4	672435	673424	ENSG00000169020	1.1e-06	-	672435	673424	0	2	84,122,	0,867	-12.5	-13.7	0.494
4	39454074	39455074	ENSG00000163682	1.3e-67	-	39454074	39455074	0	3	151,117,211,	0,458,789	-152	-154	0.572
4	173332798	173333561	ENSG00000164104	3.4e-14	-	173332798	173333561	0	2	416,62,	0,701	-29.4	-31	0.589
4	1742112	1745176	ENSG00000013810	0.00013	+	1742112	1745176	0	3	9,186,465,	0,2326,2599	-7.99	-8.93	0.679
4	39457600	39457903	ENSG00000163682	3.2e-25	-	39457600	39457903	0	2	81,99,	0,204	-54.4	-56.4	0.691
4	7062365	7064139	ENSG00000109519	0.033	-	7062365	7064139	0	2	101,79,	0,1695	-2.85	-3.42	0.772
4	121813252	121814044	ENSG00000123737	0.028	+	121813252	121814044	0	2	128,290,	0,502	-3.01	-3.59	0.794
4	168356734	168356945	ENSG00000181381	0.052	-	168356734	168356945	0	1	211,	0	-2.43	-2.95	0.927
4	56451878	56453609	ENSG00000128050	0.02	+	56451878	56453609	0	2	174,7,	0,1724	-3.28	-3.9	0.939
4	867067	867398	ENSG00000178950	0.0013	-	867067	867398	0	1	331,	0	-5.82	-6.63	1.08
4	67493864	67505091	ENSG00000145241	0.15	-	67493864	67505091	0	3	124,54,62,	0,1294,11165	-1.48	-1.87	1.26
4	112644634	112644844	ENSG00000174720	0.086	+	112644634	112644844	0	1	210,	0	-1.98	-2.45	1.41
4	87140843	87141054	ENSG00000172493	0.1	+	87140843	87141054	0	1	211,	0	-1.83	-2.28	1.44
4	40423506	40423747	ENSG00000163694	0.09	-	40423506	40423747	0	1	241,	0	-1.95	-2.41	1.56
4	73102378	73102618	ENSG00000132466	0.13	-	73102378	73102618	0	1	240,	0	-1.65	-2.07	1.67
4	42078250	42078401	ENSG00000014824	0.11	+	42078250	42078401	0	1	151,	0	-1.78	-2.23	1.97
5	432137	432258	ENSG00000063438	0.035	+	432137	432258	0	1	121,	0	-2.78	-3.35	-4.31
5	131672406	131672737	ENSG00000217128	0.058	-	131672406	131672737	0	1	331,	0	-2.33	-2.84	-4.12
5	157393045	157393166	ENSG00000055163	0.02	+	157393045	157393166	0	1	121,	0	-3.28	-3.9	-3.68
5	173317432	173318090	ENSG00000113739	0.004	-	173317432	173318090	0	1	658,	0	-4.79	-5.53	-3.33
5	115524234	115524475	ENSG00000145780	0.16	-	115524234	115524475	0	1	241,	0	-1.44	-1.82	-3.25
5	180849378	180849559	ENSG00000196670	0.0072	-	180849378	180849559	0	1	181,	0	-4.23	-4.93	-3.04
5	43376644	43376825	ENSG00000151882	0.17	-	43376644	43376825	0	1	181,	0	-1.37	-1.75	-2.87
5	43381737	43381917	ENSG00000151882	0.061	-	43381737	43381917	0	1	180,	0	-2.3	-2.8	-2.63
5	141653938	141654118	ENSG00000120318	0.18	-	141653938	141654118	0	1	180,	0	-1.32	-1.69	-2.59
5	43476129	43483833	ENSG00000151881	0.022	-	43476129	43483833	0	3	129,98,12,	0,3760,7692	-3.22	-3.83	-2.51
5	140645198	140645378	ENSG00000113119	4.1e-06	+	140645198	140645378	0	1	180,	0	-11.3	-12.4	-2.49
5	100902845	100902966	ENSG00000113532	0.18	-	100902845	100902966	0	1	121,	0	-1.35	-1.72	-2.46
5	134855072	134855372	ENSG00000181904	0.013	+	134855072	134855372	0	1	300,	0	-3.7	-4.36	-2.42
5	177501906	177502356	ENSG00000146094	1.3e-11	-	177501906	177502356	0	1	450,	0	-23.6	-25.1	-2.42
5	57175602	57175903	ENSG00000062194	0.01	+	57175602	57175903	0	1	301,	0	-3.9	-4.58	-2.41
5	66054198	66054619	ENSG00000112851	0.0008	+	66054198	66054619	0	1	421,	0	-6.29	-7.13	-2.39
5	172090310	172092556	ENSG00000072786	0.014	-	172090310	172092556	0	2	52,129,	0,2117	-3.63	-4.28	-2.38
5	133959648	133959828	ENSG00000113583	3e-05	-	133959648	133959828	0	1	180,	0	-9.39	-10.4	-2.36
5	31526354	31526804	ENSG00000113360	3.1e-09	-	31526354	31526804	0	1	450,	0	-18.3	-19.6	-2.31
5	179765732	179766032	ENSG00000161021	0.087	+	179765732	179766032	0	1	300,	0	-1.98	-2.44	-2.3
5	177294011	177294911	ENSG00000165671	0.00014	+	177294011	177294911	0	1	900,	0	-7.97	-8.9	-2.27
5	175926704	175959728	ENSG00000051596	0.00052	-	175926704	175959728	0	2	37,202,	0,32822	-6.71	-7.56	-2.23
5	126493192	126493402	ENSG00000155324	0.18	+	126493192	126493402	0	1	210,	0	-1.35	-1.73	-2.18
5	43446276	43446337	ENSG00000151881	0.022	-	43446276	43446337	0	1	61,	0	-3.2	-3.81	-2.17
5	112984078	112985858	ENSG00000172795	0.077	+	112984078	112985858	0	2	573,27,	0,1753	-2.08	-2.56	-2.16
5	140528500	140529491	ENSG00000131503	6.3e-14	+	140528500	140529491	0	1	991,	0	-28.8	-30.4	-2.16
5	170252449	170258219	ENSG00000043462	9.4e-15	-	170252449	170258219	0	4	62,95,50,183,	0,669,4076,5587	-30.7	-32.3	-2.15
5	132344056	132344206	ENSG00000197208	0.16	+	132344056	132344206	0	1	150,	0	-1.45	-1.84	-2.13
5	150848207	150848387	ENSG00000237693	0.12	+	150848207	150848387	0	1	180,	0	-1.69	-2.12	-2.12
5	140528518	140529478	ENSG00000254996	6.9e-13	+	140528518	140529478	0	1	960,	0	-26.4	-28	-2.07
5	38950072	38950553	ENSG00000164327	0.09	-	38950072	38950553	0	1	481,	0	-1.94	-2.41	-2.07
5	140537637	140550252	ENSG00000213523	0.038	-	140537637	140550252	0	2	24,185,	0,12430	-2.72	-3.27	-2.05
5	178713079	178713616	ENSG00000169131	0.016	-	178713079	178713616	0	1	537,	0	-3.51	-4.15	-2.04
5	151811226	151811377	ENSG00000145907	6.6e-05	+	151811226	151811377	0	1	151,	0	-8.66	-9.62	-2.01
5	43575211	43575631	ENSG00000248092	0.034	-	43575211	43575631	0	1	420,	0	-2.81	-3.37	-2.01
5	140245038	140245338	ENSG00000113068	1e-11	-	140245038	140245338	0	1	300,	0	-23.8	-25.3	-2.01
5	138187414	138187655	ENSG00000112984	4.6e-06	+	138187414	138187655	0	1	241,	0	-11.3	-12.3	-1.99
5	176290103	176290343	ENSG00000170085	0.055	+	176290103	176290343	0	1	240,	0	-2.38	-2.9	-1.99
5	114488996	114663026	ENSG00000246316	7.6e-05	-	114488996	114663026	0	3	35,77,66,	0,7105,173964	-8.53	-9.49	-1.95
5	177515048	177515374	ENSG00000183258	3e-05	-	177515048	177515374	0	2	21,189,	0,137	-9.4	-10.4	-1.95
5	80873216	80875980	ENSG00000113318	0.052	+	80873216	80875980	0	2	71,230,	0,2534	-2.44	-2.96	-1.94
5	140673823	140674124	ENSG00000120314	4.2e-11	+	140673823	140674124	0	1	301,	0	-22.4	-23.9	-1.92
5	5463986	5464316	ENSG00000164151	0.042	+	5463986	5464316	0	1	330,	0	-2.63	-3.18	-1.91
5	181257238	181257448	ENSG00000233937	0.0031	+	181257238	181257448	0	1	210,	0	-5.03	-5.79	-1.91
5	181257253	181257463	ENSG00000183718	0.003	-	181257253	181257463	0	1	210,	0	-5.04	-5.8	-1.91
5	138163305	138165166	ENSG00000112983	2.8e-07	-	138163305	138165166	0	5	39,57,47,94,453,	0,281,781,1014,1408	-13.9	-15.1	-1.9
5	180849678	180850069	ENSG00000196670	0.013	-	180849678	180850069	0	1	391,	0	-3.67	-4.33	-1.9
5	134156368	134156549	ENSG00000113558	0.11	-	134156368	134156549	0	1	181,	0	-1.8	-2.25	-1.87
5	16665269	16665539	ENSG00000145555	0.018	-	16665269	16665539	0	1	270,	0	-3.4	-4.03	-1.83
5	181257260	181257440	ENSG00000183718	0.0069	-	181257260	181257440	0	1	180,	0	-4.28	-4.98	-1.83
5	116087586	116092611	ENSG00000145781	0.053	+	116087586	116092611	0	3	1,111,67,	0,3492,4958	-2.42	-2.94	-1.81
5	32126260	32126620	ENSG00000113384	3.8e-18	-	32126260	32126620	0	1	360,	0	-38.3	-40.1	-1.81
5	80478840	80478931	ENSG00000039319	0.14	+	80478840	80478931	0	1	91,	0	-1.57	-1.98	-1.78
5	43486730	43486969	ENSG00000172244	0.095	-	43486730	43486969	0	1	239,	0	-1.89	-2.35	-1.77
5	38940196	38940347	ENSG00000164327	0.11	-	38940196	38940347	0	1	151,	0	-1.75	-2.19	-1.74
5	43061603	43062082	ENSG00000272144	0.00013	+	43061603	43062082	0	1	479,	0	-7.99	-8.92	-1.71
5	43017656	43017927	ENSG00000177738	0.042	-	43017656	43017927	0	1	271,	0	-2.62	-3.16	-1.68
5	140550400	140550759	ENSG00000213523	5.1e-13	-	140550400	140550759	0	1	359,	0	-26.8	-28.3	-1.68
5	179730804	179730925	ENSG00000127022	1.8e-24	+	179730804	179730925	0	1	121,	0	-52.7	-54.7	-1.67
5	81304767	81308482	ENSG00000131732	0.00048	+	81304767	81308482	0	2	374,76,	0,3639	-6.79	-7.65	-1.66
5	141640927	141641077	ENSG00000164620	3e-05	+	141640927	141641077	0	1	150,	0	-9.38	-10.4	-1.66
5	990095	990393	ENSG00000215246	0.13	-	990095	990393	0	1	298,	0	-1.65	-2.07	-1.66
5	100811430	100811941	ENSG00000113532	0.036	-	100811430	100811941	0	1	511,	0	-2.77	-3.33	-1.66
5	134927048	134927228	ENSG00000247627	2.5e-06	-	134927048	134927228	0	1	180,	0	-11.8	-12.9	-1.66
5	67182251	67184410	ENSG00000134061	3.6e-28	-	67182251	67184410	0	1	2159,	0	-61	-63.2	-1.65
5	476508	477169	ENSG00000225138	0.01	+	476508	477169	0	2	55,66,	0,595	-3.92	-4.6	-1.64
5	134924498	134924644	ENSG00000249119	0.019	+	134924498	134924644	0	1	146,	0	-3.34	-3.96	-1.64
5	43453823	43454032	ENSG00000151881	0.077	-	43453823	43454032	0	1	209,	0	-2.08	-2.56	-1.64
5	66169969	66174690	ENSG00000153914	5.1e-08	+	66169969	66174690	0	3	201,363,67,	0,615,4654	-15.5	-16.8	-1.63
5	134741125	134744004	ENSG00000164615	0.00062	+	134741125	134744004	0	2	398,18,	0,2861	-6.54	-7.39	-1.63
5	40853377	40854455	ENSG00000132357	0.00013	+	40853377	40854455	0	1	1078,	0	-8.04	-8.97	-1.61
5	78485214	78485515	ENSG00000145685	0.00047	-	78485214	78485515	0	1	301,	0	-6.8	-7.66	-1.6
5	135448883	135449602	ENSG00000255833	9.7e-26	-	135448883	135449602	0	1	719,	0	-55.5	-57.6	-1.59
5	179837287	179837647	ENSG00000161010	1.9e-14	-	179837287	179837647	0	1	360,	0	-30	-31.6	-1.57
5	61543778	61544287	ENSG00000130449	0.096	+	61543778	61544287	0	1	509,	0	-1.88	-2.34	-1.52
5	179609756	179610026	ENSG00000176783	4.6e-06	+	179609756	179610026	0	1	270,	0	-11.2	-12.3	-1.51
5	178231479	178231984	ENSG00000175309	0.002	-	178231479	178231984	0	2	44,316,	0,189	-5.44	-6.23	-1.51
5	36975983	36984677	ENSG00000164190	0.19	+	36975983	36984677	0	2	419,2,	0,8692	-1.32	-1.68	-1.49
5	6754806	6755165	ENSG00000112941	0.0037	+	6754806	6755165	0	1	359,	0	-4.86	-5.61	-1.48
5	177306452	177306691	ENSG00000169230	1.1e-22	+	177306452	177306691	0	1	239,	0	-48.7	-50.6	-1.48
5	177372451	177372601	ENSG00000169220	0.063	+	177372451	177372601	0	1	150,	0	-2.25	-2.76	-1.48
5	159158606	159158967	ENSG00000145860	0.077	-	159158606	159158967	0	1	361,	0	-2.08	-2.56	-1.46
5	177306430	177306701	ENSG00000213347	9.6e-22	-	177306430	177306701	0	1	271,	0	-46.4	-48.4	-1.46
5	179837300	179837630	ENSG00000161011	6.2e-09	+	179837300	179837630	0	1	330,	0	-17.6	-18.9	-1.45
5	41731502	41731712	ENSG00000083720	0.0024	-	41731502	41731712	0	1	210,	0	-5.28	-6.05	-1.45
5	88804588	88823945	ENSG00000081189	0.013	-	88804588	88823945	0	3	213,27,211,	0,13216,19146	-3.66	-4.31	-1.44
5	140566659	140567047	ENSG00000176087	0.0062	+	140566659	140567047	0	1	388,	0	-4.38	-5.09	-1.43
5	31401184	31406877	ENSG00000113360	3.4e-14	-	31401184	31406877	0	3	378,47,25,	0,4492,5668	-29.4	-31	-1.43
5	180808663	180808994	ENSG00000131446	0.044	-	180808663	180808994	0	1	331,	0	-2.58	-3.12	-1.43
5	75360103	75360461	ENSG00000113161	0.043	+	75360103	75360461	0	2	36,174,	0,184	-2.61	-3.15	-1.41
5	132595742	132604901	ENSG00000283782	0.066	+	132595742	132604901	0	4	68,190,127,96,	0,7557,8177,9063	-2.22	-2.72	-1.41
5	140281404	140293007	ENSG00000113068	0.054	-	140281404	140293007	0	2	131,109,	0,11494	-2.4	-2.92	-1.39
5	150691420	150691571	ENSG00000086589	0.008	-	150691420	150691571	0	1	151,	0	-4.13	-4.83	-1.39
5	43043551	43045301	ENSG00000215068	4.6e-06	+	43043551	43045301	0	2	16,909,	0,841	-11.3	-12.3	-1.38
5	177295210	177295780	ENSG00000165671	0.02	+	177295210	177295780	0	1	570,	0	-3.3	-3.92	-1.37
5	178883955	178884346	ENSG00000178338	0.15	+	178883955	178884346	0	1	391,	0	-1.51	-1.9	-1.37
5	98855873	98858348	ENSG00000153922	1.2e-05	-	98855873	98858348	0	2	852,169,	0,2306	-10.3	-11.3	-1.37
5	50794329	50795328	ENSG00000151883	9.2e-06	+	50794329	50795328	0	2	3,476,	0,523	-10.6	-11.6	-1.36
5	88944406	88944796	ENSG00000248309	0.19	+	88944406	88944796	0	1	390,	0	-1.31	-1.68	-1.36
5	123346473	123358276	ENSG00000168944	0.043	-	123346473	123358276	0	3	280,146,25,	0,3470,11778	-2.6	-3.14	-1.36
5	135446251	135446461	ENSG00000255833	2.8e-05	-	135446251	135446461	0	1	210,	0	-9.49	-10.5	-1.36
5	112864621	112867582	ENSG00000258864	4.7e-05	+	112864621	112867582	0	2	111,179,	0,2782	-8.97	-9.96	-1.35
5	177455960	177456286	ENSG00000131188	0.019	+	177455960	177456286	0	1	326,	0	-3.36	-3.98	-1.35
5	170248421	170248811	ENSG00000043462	5.1e-13	-	170248421	170248811	0	1	390,	0	-26.7	-28.3	-1.35
5	82254187	82254787	ENSG00000152348	0.1	+	82254187	82254787	0	1	600,	0	-1.84	-2.29	-1.34
5	477411	482085	ENSG00000066230	0.00011	-	477411	482085	0	4	33,329,71,18,	0,2225,4153,4656	-8.16	-9.11	-1.33
5	132600095	132604895	ENSG00000113522	0.11	+	132600095	132604895	0	4	43,190,127,90,	0,3204,3824,4710	-1.81	-2.25	-1.32
5	138467402	138467582	ENSG00000120738	0.17	+	138467402	138467582	0	1	180,	0	-1.4	-1.78	-1.32
5	143222711	143223042	ENSG00000145819	0.12	+	143222711	143223042	0	1	331,	0	-1.73	-2.16	-1.32
5	466510	470672	ENSG00000188242	0.028	-	466510	470672	0	2	16,163,	0,3999	-2.98	-3.56	-1.32
5	141640916	141641097	ENSG00000197948	5.5e-05	-	141640916	141641097	0	1	181,	0	-8.83	-9.81	-1.32
5	1051272	1051573	ENSG00000113504	0.13	-	1051272	1051573	0	1	301,	0	-1.62	-2.04	-1.3
5	135446243	135446453	ENSG00000251380	3.4e-05	-	135446243	135446453	0	1	210,	0	-9.26	-10.3	-1.3
5	10657007	10657427	ENSG00000164236	0.0093	+	10657007	10657427	0	1	420,	0	-4	-4.68	-1.29
5	132998412	133000140	ENSG00000155329	0.06	-	132998412	133000140	0	2	438,9,	0,1719	-2.31	-2.82	-1.29
5	135444213	135445199	ENSG00000251380	5e-45	-	135444213	135445199	0	1	986,	0	-99.9	-102	-1.29
5	135444217	135445205	ENSG00000255833	1.4e-44	-	135444217	135445205	0	1	988,	0	-98.9	-101	-1.29
5	1798385	1798653	ENSG00000171421	1.9e-09	-	1798385	1798653	0	1	268,	0	-18.8	-20.1	-1.27
5	159158007	159158547	ENSG00000145860	0.051	-	159158007	159158547	0	1	540,	0	-2.45	-2.98	-1.27
5	177511576	177511726	ENSG00000183258	1.9e-09	-	177511576	177511726	0	1	150,	0	-18.7	-20.1	-1.26
5	69129510	69130020	ENSG00000145740	0.0014	+	69129510	69130020	0	1	510,	0	-5.73	-6.54	-1.25
5	157803669	157813186	ENSG00000113282	0.011	-	157803669	157813186	0	4	50,247,178,124,	0,2196,5958,9393	-3.81	-4.47	-1.25
5	180847850	180848300	ENSG00000196670	0.02	-	180847850	180848300	0	1	450,	0	-3.27	-3.89	-1.25
5	470487	470668	ENSG00000066230	0.043	-	470487	470668	0	1	181,	0	-2.61	-3.15	-1.24
5	65629790	65630296	ENSG00000253251	0.14	+	65629790	65630296	0	1	506,	0	-1.54	-1.94	-1.23
5	112865179	112867962	ENSG00000153037	9.2e-08	+	112865179	112867962	0	2	40,591,	0,2192	-15	-16.2	-1.21
5	55424853	55425002	ENSG00000067113	0.018	-	55424853	55425002	0	1	149,	0	-3.36	-3.99	-1.21
5	150401636	150401905	ENSG00000019582	1.7e-58	-	150401636	150401905	0	1	269,	0	-130	-133	-1.21
5	170261129	170267212	ENSG00000043462	0.0018	-	170261129	170267212	0	6	8,108,20,26,84,204,	0,1505,1712,1837,5678,5879	-5.52	-6.31	-1.21
5	157739450	157739838	ENSG00000113272	0.024	+	157739450	157739838	0	1	388,	0	-3.15	-3.75	-1.2
5	181234519	181234820	ENSG00000146063	0.043	+	181234519	181234820	0	1	301,	0	-2.61	-3.15	-1.2
5	57176142	57230866	ENSG00000062194	0.041	+	57176142	57230866	0	4	258,120,21,21,	0,37931,45233,54703	-2.66	-3.2	-1.19
5	477806	477927	ENSG00000225138	0.093	+	477806	477927	0	1	121,	0	-1.92	-2.38	-1.18
5	134927616	134928036	ENSG00000247627	0.012	-	134927616	134928036	0	1	420,	0	-3.79	-4.45	-1.18
5	160414362	160417115	ENSG00000164609	0.18	-	160414362	160417115	0	3	110,186,4,	0,762,2749	-1.36	-1.73	-1.18
5	40691948	40693020	ENSG00000171522	0.0056	+	40691948	40693020	0	1	1072,	0	-4.47	-5.19	-1.17
5	139307762	139308153	ENSG00000280987	0.04	+	139307762	139308153	0	1	391,	0	-2.68	-3.23	-1.16
5	122827957	122829808	ENSG00000205302	0.00011	+	122827957	122829808	0	2	89,211,	0,1640	-8.2	-9.15	-1.15
5	97167440	97167980	ENSG00000058729	0.013	-	97167440	97167980	0	1	540,	0	-3.72	-4.38	-1.14
5	134606684	134608469	ENSG00000152700	0.0031	-	134606684	134608469	0	2	382,98,	0,1687	-5.02	-5.78	-1.14
5	436821	437241	ENSG00000063438	3.1e-10	+	436821	437241	0	1	420,	0	-20.5	-21.9	-1.13
5	139307757	139308148	ENSG00000015479	0.043	+	139307757	139308148	0	1	391,	0	-2.61	-3.15	-1.13
5	34908616	34908676	ENSG00000113456	0.18	-	34908616	34908676	0	1	60,	0	-1.32	-1.69	-1.12
5	150710838	150711348	ENSG00000132912	0.0015	-	150710838	150711348	0	1	510,	0	-5.71	-6.51	-1.12
5	472566	472801	ENSG00000188242	0.19	-	472566	472801	0	2	27,123,	0,112	-1.32	-1.68	-1.11
5	95813943	95814124	ENSG00000173221	0.02	-	95813943	95814124	0	1	181,	0	-3.28	-3.89	-1.09
5	37063798	37065184	ENSG00000164190	5.6e-12	+	37063798	37065184	0	2	392,658,	0,728	-24.4	-25.9	-1.08
5	181256015	181256493	ENSG00000233937	0.038	+	181256015	181256493	0	1	478,	0	-2.73	-3.28	-1.08
5	176657675	176658065	ENSG00000048140	0.19	+	176657675	176658065	0	1	390,	0	-1.31	-1.68	-1.07
5	65571964	65576917	ENSG00000113593	0.094	+	65571964	65576917	0	2	322,39,	0,4914	-1.9	-2.36	-1.05
5	88285985	88291410	ENSG00000247828	0.14	+	88285985	88291410	0	3	82,222,27,	0,1450,5398	-1.59	-2	-1.04
5	138467014	138467343	ENSG00000120738	0.11	+	138467014	138467343	0	1	329,	0	-1.77	-2.21	-1.04
5	74769519	74776885	ENSG00000164346	1e-13	+	74769519	74776885	0	5	35,180,177,193,282,	0,1111,1957,4348,7084	-28.3	-29.9	-1.02
5	62388478	62388688	ENSG00000086189	0.02	-	62388478	62388688	0	1	210,	0	-3.31	-3.93	-1.02
5	179862065	179862156	ENSG00000197226	0.1	-	179862065	179862156	0	1	91,	0	-1.83	-2.28	-1.02
5	69414082	69414322	ENSG00000152942	0.013	+	69414082	69414322	0	1	240,	0	-3.69	-4.35	-1.01
5	173034854	173034914	ENSG00000113732	0.033	+	173034854	173034914	0	1	60,	0	-2.84	-3.41	-1.01
5	64728088	64741176	ENSG00000153006	0.15	-	64728088	64741176	0	2	91,120,	0,12968	-1.5	-1.89	-1.01
5	180850128	180851447	ENSG00000196670	0.02	-	180850128	180851447	0	1	1319,	0	-3.31	-3.92	-1.01
5	34958244	34958964	ENSG00000168724	0.012	+	34958244	34958964	0	1	720,	0	-3.79	-4.45	-0.998
5	181256038	181256486	ENSG00000183718	0.059	-	181256038	181256486	0	1	448,	0	-2.32	-2.83	-0.998
5	10681013	10683148	ENSG00000112977	0.022	-	10681013	10683148	0	2	156,53,	0,2082	-3.2	-3.81	-0.995
5	176509475	176510074	ENSG00000113194	4.5e-05	+	176509475	176510074	0	1	599,	0	-9.04	-10	-0.991
5	134196938	134197778	ENSG00000113575	2.6e-24	-	134196938	134197778	0	1	840,	0	-52.2	-54.3	-0.987
5	65587338	65587549	ENSG00000113593	0.13	+	65587338	65587549	0	1	211,	0	-1.62	-2.04	-0.984
5	141318696	141320342	ENSG00000178913	3.9e-25	-	141318696	141320342	0	1	1646,	0	-54.1	-56.2	-0.971
5	36668709	36702862	ENSG00000250155	0.12	-	36668709	36702862	0	2	2,385,	0,33768	-1.72	-2.15	-0.969
5	469956	471937	ENSG00000180104	1.7e-15	+	469956	471937	0	2	31,839,	0,1142	-32.4	-34	-0.95
5	139026966	139050962	ENSG00000120725	0.12	-	139026966	139050962	0	3	26,100,25,	0,15653,23971	-1.66	-2.08	-0.949
5	72220453	72220992	ENSG00000113048	0.0037	-	72220453	72220992	0	1	539,	0	-4.86	-5.6	-0.94
5	177609570	177610287	ENSG00000027847	0.0048	+	177609570	177610287	0	1	717,	0	-4.6	-5.33	-0.935
5	180834439	180835218	ENSG00000245060	0.06	+	180834439	180835218	0	1	779,	0	-2.31	-2.82	-0.928
5	61159673	61161157	ENSG00000188725	0.0065	-	61159673	61161157	0	2	526,70,	0,1414	-4.33	-5.04	-0.928
5	40827449	40828079	ENSG00000145592	0.00014	-	40827449	40828079	0	1	630,	0	-7.95	-8.89	-0.926
5	150396529	150400248	ENSG00000070814	1.9e-06	+	150396529	150400248	0	4	313,98,49,439,	0,1824,2492,3280	-12.1	-13.2	-0.922
5	176389683	176389771	ENSG00000146066	0.0016	+	176389683	176389771	0	1	88,	0	-5.65	-6.44	-0.919
5	74769035	74769430	ENSG00000164346	0.0021	+	74769035	74769430	0	2	83,217,	0,178	-5.37	-6.15	-0.91
5	140698929	140699318	ENSG00000112855	0.0081	+	140698929	140699318	0	1	389,	0	-4.12	-4.81	-0.91
5	138152742	138157164	ENSG00000112983	0.18	-	138152742	138157164	0	2	18,283,	0,4139	-1.36	-1.73	-0.876
5	138507647	138511108	ENSG00000120705	8.3e-07	-	138507647	138511108	0	4	740,148,65,64,	0,1021,2917,3397	-12.9	-14	-0.873
5	113593786	113594087	ENSG00000047188	0.11	+	113593786	113594087	0	1	301,	0	-1.8	-2.24	-0.872
5	139475533	139476071	ENSG00000184584	5.2e-21	-	139475533	139476071	0	1	538,	0	-44.8	-46.7	-0.871
5	180829953	180831222	ENSG00000278970	1.7e-06	-	180829953	180831222	0	1	1269,	0	-12.1	-13.3	-0.87
5	177483393	177483544	ENSG00000196923	0.00014	-	177483393	177483544	0	1	151,	0	-7.94	-8.87	-0.867
5	141516963	141524374	ENSG00000131504	0.077	-	141516963	141524374	0	4	45,151,53,232,	0,1673,1980,7179	-2.07	-2.56	-0.86
5	470760	472181	ENSG00000188242	7.7e-16	-	470760	472181	0	2	1205,75,	0,1346	-33.2	-34.8	-0.856
5	470757	472046	ENSG00000066230	2.6e-15	-	470757	472046	0	1	1289,	0	-31.9	-33.6	-0.839
5	34925279	34925698	ENSG00000113460	1.7e-07	+	34925279	34925698	0	1	419,	0	-14.4	-15.6	-0.823
5	40827702	40832555	ENSG00000145592	4.7e-20	-	40827702	40832555	0	3	249,72,114,	0,3620,4739	-42.6	-44.5	-0.823
5	154888344	154891501	ENSG00000082516	0.17	-	154888344	154891501	0	3	33,97,261,	0,976,2896	-1.38	-1.76	-0.818
5	10434000	10434181	ENSG00000145495	0.13	+	10434000	10434181	0	1	181,	0	-1.64	-2.05	-0.817
5	447721	454028	ENSG00000180104	2.3e-06	+	447721	454028	0	2	31,659,	0,5648	-11.9	-13	-0.816
5	43161348	43167947	ENSG00000172262	0.032	+	43161348	43167947	0	2	583,18,	0,6581	-2.86	-3.43	-0.814
5	435351	436072	ENSG00000063438	4.1e-07	+	435351	436072	0	1	721,	0	-13.5	-14.7	-0.8
5	141263895	141320635	ENSG00000178913	0.0067	-	141263895	141320635	0	3	39,339,118,	0,56004,56622	-4.3	-5	-0.791
5	77433207	77436361	ENSG00000164253	0.13	-	77433207	77436361	0	2	80,101,	0,3053	-1.61	-2.02	-0.778
5	69414471	69414801	ENSG00000152942	0.04	+	69414471	69414801	0	1	330,	0	-2.68	-3.23	-0.775
5	177458642	177459607	ENSG00000113758	0.041	-	177458642	177459607	0	3	65,171,5,	0,455,960	-2.65	-3.19	-0.772
5	134402086	134402801	ENSG00000237190	0.048	-	134402086	134402801	0	1	715,	0	-2.51	-3.04	-0.762
5	138555310	138555431	ENSG00000113013	5.7e-05	-	138555310	138555431	0	1	121,	0	-8.79	-9.77	-0.758
5	7900047	7900466	ENSG00000124275	0.0021	+	7900047	7900466	0	1	419,	0	-5.37	-6.15	-0.757
5	143223821	143224182	ENSG00000145819	0.14	+	143223821	143224182	0	1	361,	0	-1.59	-2	-0.74
5	43173287	43175456	ENSG00000172262	5.8e-05	+	43173287	43175456	0	2	161,1010,	0,1159	-8.78	-9.75	-0.737
5	133092722	133099648	ENSG00000170606	0.0022	+	133092722	133099648	0	4	67,153,126,104,	0,3375,4438,6822	-5.34	-6.12	-0.735
5	146507815	146511212	ENSG00000113649	4.1e-08	+	146507815	146511212	0	4	141,101,94,772,	0,1329,2251,2625	-15.8	-17	-0.728
5	96757595	96769024	ENSG00000153113	0.082	+	96757595	96769024	0	7	59,99,105,93,45,93,77,	0,4678,7625,8457,9842,10311,11352	-2.02	-2.5	-0.726
5	178148227	178148588	ENSG00000145916	0.023	+	178148227	178148588	0	1	361,	0	-3.17	-3.78	-0.712
5	160039128	160064947	ENSG00000113312	0.081	+	160039128	160064947	0	5	72,37,149,55,16,	0,4004,10385,12000,25803	-2.04	-2.51	-0.707
5	53683163	53683340	ENSG00000164258	0.095	+	53683163	53683340	0	1	177,	0	-1.89	-2.35	-0.706
5	66174869	66179415	ENSG00000153914	0.026	+	66174869	66179415	0	3	172,332,697,	0,2457,3849	-3.06	-3.66	-0.703
5	14610141	14611041	ENSG00000145569	0.00078	+	14610141	14611041	0	1	900,	0	-6.32	-7.16	-0.702
5	34937409	34950542	ENSG00000168724	1.7e-05	+	34937409	34950542	0	8	221,152,88,159,82,135,173,99,	0,1448,3686,7457,8312,12133,12760,13034	-9.93	-11	-0.694
5	146503315	146504079	ENSG00000113649	0.076	+	146503315	146504079	0	2	224,256,	0,508	-2.1	-2.58	-0.689
5	27496130	27496401	ENSG00000250337	0.0003	+	27496130	27496401	0	1	271,	0	-7.21	-8.1	-0.687
5	141939711	141940161	ENSG00000081791	0.0057	+	141939711	141940161	0	1	450,	0	-4.45	-5.17	-0.681
5	1037647	1038943	ENSG00000145506	2.8e-17	+	1037647	1038943	0	2	51,1139,	0,157	-36.4	-38.1	-0.679
5	64785571	64804471	ENSG00000153015	0.11	+	64785571	64804471	0	6	8,104,70,83,31,243,	0,952,3379,14673,15730,18657	-1.74	-2.17	-0.658
5	175707856	175708574	ENSG00000113749	0.037	+	175707856	175708574	0	1	718,	0	-2.74	-3.3	-0.645
5	10680062	10680598	ENSG00000112977	3.7e-05	-	10680062	10680598	0	1	536,	0	-9.25	-10.2	-0.644
5	177442482	177442662	ENSG00000198055	0.0022	+	177442482	177442662	0	1	180,	0	-5.36	-6.14	-0.638
5	27485032	27485962	ENSG00000250337	0.054	+	27485032	27485962	0	1	930,	0	-2.4	-2.92	-0.637
5	176905094	176905710	ENSG00000087206	0.055	-	176905094	176905710	0	2	398,53,	0,563	-2.39	-2.9	-0.625
5	160065453	160065543	ENSG00000113312	0.18	+	160065453	160065543	0	1	90,	0	-1.34	-1.71	-0.614
5	150052871	150053142	ENSG00000113716	0.055	+	150052871	150053142	0	1	271,	0	-2.38	-2.9	-0.61
5	61050463	61153037	ENSG00000164182	0.11	+	61050463	61153037	0	5	77,90,87,41,334,	0,22661,32779,48528,102240	-1.8	-2.24	-0.606
5	126805686	126819073	ENSG00000113368	0.014	+	126805686	126819073	0	5	10,171,186,78,152,	0,4493,6026,9483,13235	-3.63	-4.28	-0.606
5	140645392	140645571	ENSG00000131495	0.0076	-	140645392	140645571	0	1	179,	0	-4.18	-4.88	-0.598
5	140673903	140675254	ENSG00000170445	0.00025	-	140673903	140675254	0	3	425,147,238,	0,775,1113	-7.39	-8.29	-0.585
5	114486815	114496261	ENSG00000080709	0.00029	+	114486815	114496261	0	4	362,9,70,367,	0,3875,6587,9079	-7.26	-8.16	-0.583
5	43039286	43040198	ENSG00000177721	1e-05	-	43039286	43040198	0	1	912,	0	-10.4	-11.5	-0.575
5	43039262	43040186	ENSG00000177721	1.8e-05	-	43039262	43040186	0	1	924,	0	-9.86	-10.9	-0.563
5	119393034	119393844	ENSG00000145779	0.037	+	119393034	119393844	0	1	810,	0	-2.75	-3.31	-0.557
5	140549358	140549569	ENSG00000254996	0.092	+	140549358	140549569	0	1	211,	0	-1.92	-2.39	-0.556
5	57262611	57263061	ENSG00000062194	0.013	+	57262611	57263061	0	1	450,	0	-3.69	-4.35	-0.548
5	140114721	140115590	ENSG00000185129	0.12	+	140114721	140115590	0	1	869,	0	-1.71	-2.13	-0.548
5	140549376	140549578	ENSG00000243056	0.11	+	140549376	140549578	0	1	202,	0	-1.75	-2.19	-0.538
5	157787416	157787985	ENSG00000113282	0.0074	-	157787416	157787985	0	1	569,	0	-4.21	-4.91	-0.538
5	34953839	34954890	ENSG00000168724	0.013	+	34953839	34954890	0	2	352,338,	0,713	-3.7	-4.36	-0.536
5	141516544	141516904	ENSG00000131504	0.027	-	141516544	141516904	0	1	360,	0	-3.04	-3.63	-0.526
5	204923	205882	ENSG00000164366	0.031	-	204923	205882	0	1	959,	0	-2.9	-3.48	-0.524
5	176383937	176384713	ENSG00000048162	3.4e-05	-	176383937	176384713	0	2	437,71,	0,705	-9.27	-10.3	-0.524
5	172043571	172043781	ENSG00000072786	0.087	-	172043571	172043781	0	1	210,	0	-1.97	-2.44	-0.516
5	864026	865440	ENSG00000028310	0.0042	-	864026	865440	0	2	542,27,	0,1387	-4.73	-5.47	-0.491
5	157138421	157139373	ENSG00000155868	0.095	-	157138421	157139373	0	1	952,	0	-1.89	-2.35	-0.49
5	177592484	177593299	ENSG00000184840	0.14	+	177592484	177593299	0	2	191,78,	0,737	-1.57	-1.97	-0.463
5	6372506	6372597	ENSG00000133398	0.18	-	6372506	6372597	0	1	91,	0	-1.33	-1.7	-0.455
5	14710461	14716771	ENSG00000154122	0.13	-	14710461	14716771	0	4	849,100,124,66,	0,2412,3082,6244	-1.62	-2.03	-0.445
5	32354349	32354589	ENSG00000056097	0.013	-	32354349	32354589	0	1	240,	0	-3.71	-4.37	-0.444
5	140661549	140662479	ENSG00000113141	0.027	+	140661549	140662479	0	3	159,109,301,	0,349,629	-3.02	-3.61	-0.441
5	73502855	73503093	ENSG00000145741	1.9e-06	+	73502855	73503093	0	1	238,	0	-12.1	-13.2	-0.439
5	179863293	179865497	ENSG00000197226	0.021	-	179863293	179865497	0	2	835,244,	0,1960	-3.25	-3.87	-0.424
5	33466869	33468132	ENSG00000113407	2.5e-09	+	33466869	33468132	0	2	116,573,	0,690	-18.5	-19.8	-0.42
5	177503254	177504329	ENSG00000146094	0.11	-	177503254	177504329	0	2	138,582,	0,493	-1.78	-2.22	-0.415
5	181236908	181237119	ENSG00000204628	5.2e-17	-	181236908	181237119	0	1	211,	0	-35.7	-37.5	-0.413
5	179614687	179615048	ENSG00000169045	0.0054	-	179614687	179615048	0	1	361,	0	-4.5	-5.22	-0.396
5	44813613	44815373	ENSG00000112996	0.015	+	44813613	44815373	0	2	16,461,	0,1299	-3.54	-4.19	-0.379
5	139321961	139329513	ENSG00000280987	0.011	+	139321961	139329513	0	6	68,44,370,367,122,169,	0,501,636,3334,4201,7383	-3.8	-4.47	-0.357
5	73505307	73505576	ENSG00000145741	0.025	+	73505307	73505576	0	1	269,	0	-3.1	-3.7	-0.356
5	139321934	139329517	ENSG00000015479	0.014	+	139321934	139329517	0	6	95,44,370,367,122,173,	0,528,663,3361,4228,7410	-3.6	-4.25	-0.346
5	32355725	32364003	ENSG00000056097	0.059	-	32355725	32364003	0	2	214,56,	0,8222	-2.32	-2.83	-0.256
5	40832424	40834000	ENSG00000145592	3.4e-12	-	40832424	40834000	0	2	149,122,	0,1454	-24.9	-26.4	-0.252
5	33454963	33459862	ENSG00000113407	0.12	+	33454963	33459862	0	7	103,118,65,79,147,99,168,	0,623,1038,1185,2293,3602,4731	-1.72	-2.16	-0.242
5	82276040	82276309	ENSG00000186468	0.0011	-	82276040	82276309	0	1	269,	0	-6.03	-6.85	-0.235
5	479488	480884	ENSG00000225138	0.12	+	479488	480884	0	1	1396,	0	-1.68	-2.11	-0.2
5	178237617	178246392	ENSG00000050767	0.026	-	178237617	178246392	0	7	1083,39,87,54,27,54,2,	0,1523,4424,4723,8324,8636,8773	-3.06	-3.65	0.205
5	179723772	179728917	ENSG00000127022	0.12	+	179723772	179728917	0	4	7,127,80,327,	0,884,2907,4818	-1.66	-2.08	0.267
5	177594250	177595737	ENSG00000184840	3e-05	+	177594250	177595737	0	2	35,471,	0,1016	-9.37	-10.4	0.336
5	176392874	176397992	ENSG00000175416	0.16	-	176392874	176397992	0	4	71,54,112,63,	0,3604,4732,5055	-1.42	-1.81	0.338
5	36871363	36871694	ENSG00000285967	0.17	-	36871363	36871694	0	1	331,	0	-1.4	-1.78	0.388
5	177596004	177596124	ENSG00000184840	0.16	+	177596004	177596124	0	1	120,	0	-1.46	-1.85	0.414
5	138946899	138947259	ENSG00000120725	0.047	-	138946899	138947259	0	1	360,	0	-2.52	-3.06	0.427
5	179589477	179602063	ENSG00000176783	0.096	+	179589477	179602063	0	8	170,98,117,168,98,122,130,172,	0,1383,2147,4000,5388,7082,9214,12414	-1.88	-2.34	0.435
5	178209335	178209395	ENSG00000197451	0.16	+	178209335	178209395	0	1	60,	0	-1.43	-1.81	0.436
5	40834149	40834239	ENSG00000145592	7.9e-26	-	40834149	40834239	0	1	90,	0	-55.7	-57.8	0.442
5	151742794	151743064	ENSG00000177556	0.07	-	151742794	151743064	0	1	270,	0	-2.17	-2.66	0.444
5	177307179	177307600	ENSG00000213347	0.034	-	177307179	177307600	0	1	421,	0	-2.82	-3.38	0.489
5	32591506	32594660	ENSG00000113387	2.1e-10	+	32591506	32594660	0	2	181,90,	0,3064	-20.9	-22.3	0.501
5	16451518	16458554	ENSG00000173545	0.014	-	16451518	16458554	0	3	266,144,38,	0,1494,6998	-3.65	-4.3	0.512
5	141515015	141515166	ENSG00000131504	0.042	-	141515015	141515166	0	1	151,	0	-2.62	-3.16	0.516
5	138566628	138567151	ENSG00000113013	0.005	-	138566628	138567151	0	2	90,151,	0,372	-4.57	-5.3	0.518
5	171407637	171410629	ENSG00000181163	0.0017	+	171407637	171410629	0	2	137,103,	0,2889	-5.6	-6.39	0.521
5	32598875	32601351	ENSG00000113387	8.8e-30	+	32598875	32601351	0	2	194,347,	0,2129	-64.7	-66.9	0.525
5	112878747	112878808	ENSG00000129625	0.16	-	112878747	112878808	0	1	61,	0	-1.45	-1.84	0.538
5	180791918	180792219	ENSG00000131446	0.02	-	180791918	180792219	0	1	301,	0	-3.3	-3.91	0.583
5	1814624	1816072	ENSG00000145494	1.9e-08	+	1814624	1816072	0	2	75,222,	0,1226	-16.6	-17.8	0.646
5	33461245	33462140	ENSG00000113407	1.8e-05	+	33461245	33462140	0	4	50,78,101,42,	0,421,660,853	-9.9	-10.9	0.651
5	432887	434872	ENSG00000063438	3.8e-12	+	432887	434872	0	2	60,1020,	0,965	-24.8	-26.3	0.658
5	181224055	181224716	ENSG00000146063	0.05	+	181224055	181224716	0	1	661,	0	-2.46	-2.99	0.691
5	17217738	17276184	ENSG00000176788	6.3e-13	+	17217738	17276184	0	2	72,977,	0,57469	-26.6	-28.1	0.716
5	150444193	150444619	ENSG00000164587	4.3e-180	-	150444193	150444619	0	2	160,141,	0,285	-434	-413	0.726
5	112162096	112162336	ENSG00000224032	5.4e-05	+	112162096	112162336	0	1	240,	0	-8.85	-9.83	0.734
5	137753026	137753327	ENSG00000177733	2.5e-06	-	137753026	137753327	0	1	301,	0	-11.8	-12.9	0.743
5	171391657	171405500	ENSG00000181163	2.1e-62	+	171391657	171405500	0	5	142,269,58,140,199,	0,1052,8495,9128,13644	-139	-142	0.793
5	442365	442635	ENSG00000221990	0.12	-	442365	442635	0	1	270,	0	-1.7	-2.13	0.835
5	135351404	135353046	ENSG00000113648	0.00046	-	135351404	135353046	0	2	140,101,	0,1541	-6.82	-7.69	0.858
5	442358	442626	ENSG00000221990	0.11	-	442358	442626	0	1	268,	0	-1.81	-2.25	0.866
5	178205771	178205980	ENSG00000197451	0.0044	+	178205771	178205980	0	1	209,	0	-4.69	-5.42	0.898
5	36875620	36876160	ENSG00000285967	0.0018	-	36875620	36876160	0	1	540,	0	-5.55	-6.34	0.954
5	34915711	34915981	ENSG00000113456	0.15	-	34915711	34915981	0	1	270,	0	-1.49	-1.88	0.956
5	90399336	90405420	ENSG00000153140	0.11	-	90399336	90405420	0	2	213,27,	0,6057	-1.79	-2.23	0.965
5	151034972	151036958	ENSG00000145901	0.00084	-	151034972	151036958	0	3	95,126,169,	0,609,1817	-6.25	-7.08	0.968
5	465059	465270	ENSG00000180104	6.1e-06	+	465059	465270	0	1	211,	0	-10.9	-12	0.997
5	154950845	154955226	ENSG00000082515	0.18	+	154950845	154955226	0	2	93,28,	0,4353	-1.32	-1.69	1.03
5	93682955	93683371	ENSG00000249353	3.1e-11	-	93682955	93683371	0	1	416,	0	-22.8	-24.2	1.04
5	10657636	10657816	ENSG00000164236	0.16	+	10657636	10657816	0	1	180,	0	-1.46	-1.85	1.08
5	36872614	36876180	ENSG00000285967	0.00034	-	36872614	36876180	0	2	28,510,	0,3056	-7.1	-7.98	1.1
5	181232660	181232871	ENSG00000146063	0.15	+	181232660	181232871	0	1	211,	0	-1.5	-1.9	1.21
5	178249116	178257566	ENSG00000050767	3.1e-10	-	178249116	178257566	0	7	90,45,54,78,45,63,44,	0,944,3427,5832,7236,7749,8406	-20.5	-21.9	1.37
5	170270794	170273867	ENSG00000043462	0.076	-	170270794	170273867	0	2	123,87,	0,2986	-2.09	-2.58	1.38
5	139284538	139284899	ENSG00000281398	0.008	+	139284538	139284899	0	1	361,	0	-4.14	-4.83	1.39
5	179833341	179833631	ENSG00000161011	3.7e-05	+	179833341	179833631	0	2	45,45,	0,245	-9.16	-10.2	1.68
5	178204923	178205623	ENSG00000197451	1.1e-10	+	178204923	178205623	0	2	123,56,	0,644	-21.5	-22.9	1.86
5	178223717	178224342	ENSG00000175309	0.063	-	178223717	178224342	0	2	228,12,	0,613	-2.27	-2.77	2.26
5	474894	474985	ENSG00000066230	0.05	-	474894	474985	0	1	91,	0	-2.48	-3	2.68
6	107633756	107633906	ENSG00000112320	0.17	+	107633756	107633906	0	1	150,	0	-1.4	-1.78	-3.15
6	34859143	34859383	ENSG00000065060	0.11	+	34859143	34859383	0	1	240,	0	-1.75	-2.19	-3.1
6	42268650	42268741	ENSG00000124496	0.028	-	42268650	42268741	0	1	91,	0	-2.98	-3.56	-3.07
6	145625669	145625910	ENSG00000112425	0.069	-	145625669	145625910	0	1	241,	0	-2.19	-2.68	-2.92
6	148548545	148548785	ENSG00000111961	0.042	+	148548545	148548785	0	1	240,	0	-2.63	-3.17	-2.86
6	28995353	28995714	ENSG00000197935	0.051	-	28995353	28995714	0	1	361,	0	-2.45	-2.98	-2.86
6	152972393	152972573	ENSG00000112029	0.0011	-	152972393	152972573	0	1	180,	0	-6.03	-6.85	-2.82
6	151445300	151445659	ENSG00000155906	3.7e-05	-	151445300	151445659	0	1	359,	0	-9.22	-10.2	-2.79
6	20482898	20488215	ENSG00000112242	0.046	+	20482898	20488215	0	3	22,115,103,	0,3790,5214	-2.53	-3.07	-2.76
6	42268170	42268591	ENSG00000124496	7.3e-05	-	42268170	42268591	0	1	421,	0	-8.57	-9.53	-2.6
6	161048976	161049336	ENSG00000085511	0.058	+	161048976	161049336	0	1	360,	0	-2.34	-2.85	-2.56
6	30562495	30562646	ENSG00000204576	0.00018	+	30562495	30562646	0	1	151,	0	-7.7	-8.62	-2.52
6	145805404	145805854	ENSG00000118496	0.035	-	145805404	145805854	0	1	450,	0	-2.77	-3.34	-2.46
6	30184694	30184785	ENSG00000234127	0.00068	-	30184694	30184785	0	1	91,	0	-6.44	-7.29	-2.43
6	41770562	41770682	ENSG00000137218	0.034	-	41770562	41770682	0	1	120,	0	-2.81	-3.37	-2.42
6	41494881	41524087	ENSG00000234753	0.0041	-	41494881	41524087	0	2	12,193,	0,29013	-4.75	-5.49	-2.4
6	87700531	87700771	ENSG00000135334	0.00027	-	87700531	87700771	0	1	240,	0	-7.3	-8.2	-2.38
6	43012192	43012342	ENSG00000112640	3.2e-19	+	43012192	43012342	0	1	150,	0	-40.8	-42.6	-2.36
6	16143819	16146970	ENSG00000007944	4.6e-14	+	16143819	16146970	0	3	44,421,309,	0,1077,2842	-29.1	-30.7	-2.35
6	52490935	52492415	ENSG00000096093	0.015	+	52490935	52492415	0	2	65,146,	0,1334	-3.54	-4.18	-2.28
6	26158203	26158349	ENSG00000158373	0.16	+	26158203	26158349	0	1	146,	0	-1.47	-1.86	-2.24
6	8015507	8017824	ENSG00000188428	0.0019	-	8015507	8017824	0	2	321,38,	0,2279	-5.47	-6.26	-2.24
6	116252736	116252976	ENSG00000187189	0.033	-	116252736	116252976	0	1	240,	0	-2.84	-3.41	-2.24
6	4891719	4935626	ENSG00000153046	9.1e-05	+	4891719	4935626	0	3	660,34,112,	0,36975,43795	-8.35	-9.3	-2.23
6	170318848	170323193	ENSG00000112584	0.002	+	170318848	170323193	0	2	276,115,	0,4230	-5.42	-6.21	-2.22
6	157200993	157201414	ENSG00000049618	0.0017	+	157200993	157201414	0	1	421,	0	-5.57	-6.37	-2.21
6	107658343	107658583	ENSG00000112320	0.09	+	107658343	107658583	0	1	240,	0	-1.94	-2.41	-2.18
6	31859485	31859725	ENSG00000204386	3.4e-11	-	31859485	31859725	0	1	240,	0	-22.7	-24.1	-2.17
6	32812792	32812911	ENSG00000241106	0.00057	-	32812792	32812911	0	1	119,	0	-6.62	-7.47	-2.17
6	28153103	28153493	ENSG00000198315	0.028	+	28153103	28153493	0	1	390,	0	-3.01	-3.59	-2.16
6	110479255	110479436	ENSG00000260188	0.013	+	110479255	110479436	0	1	181,	0	-3.72	-4.38	-2.16
6	138420011	138420252	ENSG00000051620	0.11	+	138420011	138420252	0	1	241,	0	-1.76	-2.2	-2.16
6	31197439	31197649	ENSG00000272501	0.13	-	31197439	31197649	0	1	210,	0	-1.6	-2.01	-2.16
6	42691046	42691287	ENSG00000024048	1.1e-08	+	42691046	42691287	0	1	241,	0	-17	-18.3	-2.12
6	41600377	41600647	ENSG00000137166	9.2e-06	+	41600377	41600647	0	1	270,	0	-10.5	-11.6	-2.1
6	33304695	33304755	ENSG00000231925	0.022	-	33304695	33304755	0	1	60,	0	-3.22	-3.83	-2.1
6	13604850	13605031	ENSG00000124523	0.19	+	13604850	13605031	0	1	181,	0	-1.31	-1.68	-2.09
6	3105687	3105926	ENSG00000137275	0.078	+	3105687	3105926	0	1	239,	0	-2.07	-2.55	-2.08
6	17637185	17637666	ENSG00000124789	0.0067	-	17637185	17637666	0	1	481,	0	-4.3	-5.01	-2.06
6	137198376	137198497	ENSG00000027697	5.3e-05	-	137198376	137198497	0	1	121,	0	-8.87	-9.85	-2.05
6	56458946	56459246	ENSG00000151914	0.064	-	56458946	56459246	0	1	300,	0	-2.24	-2.75	-2.03
6	30341870	30342171	ENSG00000204599	0.022	+	30341870	30342171	0	1	301,	0	-3.22	-3.83	-2.01
6	35292374	35292525	ENSG00000065029	0.0018	+	35292374	35292525	0	1	151,	0	-5.54	-6.33	-2.01
6	149378089	149379465	ENSG00000055208	2.3e-08	+	149378089	149379465	0	1	1376,	0	-16.3	-17.6	-1.99
6	151436451	151436631	ENSG00000155906	0.15	-	151436451	151436631	0	1	180,	0	-1.51	-1.9	-1.98
6	110475939	110476149	ENSG00000004809	0.19	-	110475939	110476149	0	1	210,	0	-1.32	-1.68	-1.96
6	5368912	5369152	ENSG00000145982	0.013	+	5368912	5369152	0	1	240,	0	-3.7	-4.36	-1.92
6	28277894	28278194	ENSG00000197062	0.11	+	28277894	28278194	0	1	300,	0	-1.76	-2.2	-1.92
6	33316293	33316594	ENSG00000236104	0.0086	-	33316293	33316594	0	1	301,	0	-4.07	-4.76	-1.92
6	43012187	43012487	ENSG00000124733	4.5e-39	-	43012187	43012487	0	1	300,	0	-86	-88.3	-1.92
6	118905796	118907879	ENSG00000111875	6.3e-18	+	118905796	118907879	0	2	32,478,	0,1605	-37.8	-39.6	-1.9
6	111694378	111696349	ENSG00000010810	0.083	-	111694378	111696349	0	3	150,77,73,	0,249,1898	-2.02	-2.49	-1.85
6	63712479	63713950	ENSG00000118482	1.1e-26	+	63712479	63713950	0	1	1471,	0	-57.8	-59.8	-1.84
6	110100625	110102132	ENSG00000112290	9.1e-05	-	110100625	110102132	0	2	54,545,	0,962	-8.34	-9.3	-1.82
6	41684634	41684785	ENSG00000112561	0.00023	-	41684634	41684785	0	1	151,	0	-7.47	-8.38	-1.8
6	27452020	27452408	ENSG00000096654	0.059	-	27452020	27452408	0	1	388,	0	-2.32	-2.83	-1.79
6	63573606	63576608	ENSG00000112245	0.046	+	63573606	63576608	0	2	7,173,	0,2829	-2.56	-3.09	-1.77
6	111580385	111591763	ENSG00000056972	0.0013	-	111580385	111591763	0	2	4,506,	0,10872	-5.82	-6.63	-1.76
6	17615874	17616025	ENSG00000124789	0.0015	-	17615874	17616025	0	1	151,	0	-5.71	-6.51	-1.75
6	24703749	24704318	ENSG00000112304	0.012	+	24703749	24704318	0	1	569,	0	-3.73	-4.39	-1.73
6	109481143	109481594	ENSG00000112365	0.11	-	109481143	109481594	0	1	451,	0	-1.75	-2.19	-1.73
6	149683256	149683676	ENSG00000131023	0.018	-	149683256	149683676	0	1	420,	0	-3.37	-4	-1.73
6	106568559	106568980	ENSG00000112297	0.00092	+	106568559	106568980	0	1	421,	0	-6.16	-6.99	-1.72
6	99369399	99369638	ENSG00000132423	0.027	-	99369399	99369638	0	1	239,	0	-3.02	-3.61	-1.72
6	11185093	11185483	ENSG00000111859	0.14	-	11185093	11185483	0	1	390,	0	-1.53	-1.94	-1.71
6	32180967	32181146	ENSG00000204305	0.0066	-	32180967	32181146	0	1	179,	0	-4.31	-5.02	-1.71
6	31969809	31969900	ENSG00000204348	0.043	-	31969809	31969900	0	1	91,	0	-2.61	-3.15	-1.69
6	159748247	159748578	ENSG00000146457	0.0031	+	159748247	159748578	0	1	331,	0	-5.01	-5.77	-1.68
6	33201192	33201642	ENSG00000112473	7.5e-06	+	33201192	33201642	0	1	450,	0	-10.7	-11.8	-1.66
6	63576445	63576596	ENSG00000285976	0.07	+	63576445	63576596	0	1	151,	0	-2.17	-2.66	-1.66
6	28903001	28903152	ENSG00000204713	8.3e-08	-	28903001	28903152	0	1	151,	0	-15.1	-16.3	-1.65
6	52403468	52403648	ENSG00000170915	0.12	+	52403468	52403648	0	1	180,	0	-1.69	-2.12	-1.64
6	111661347	111661706	ENSG00000010810	0.0048	-	111661347	111661706	0	1	359,	0	-4.6	-5.33	-1.64
6	43523525	43523675	ENSG00000124571	0.037	-	43523525	43523675	0	1	150,	0	-2.74	-3.29	-1.63
6	45422320	45422560	ENSG00000124813	0.019	+	45422320	45422560	0	1	240,	0	-3.32	-3.94	-1.61
6	30685983	30686342	ENSG00000146112	0.00026	-	30685983	30686342	0	1	359,	0	-7.36	-8.27	-1.6
6	32185639	32186089	ENSG00000204304	2.8e-13	-	32185639	32186089	0	1	450,	0	-27.3	-28.9	-1.59
6	35575530	35577180	ENSG00000096060	4.7e-05	-	35575530	35577180	0	2	412,187,	0,1463	-8.97	-9.96	-1.59
6	43624951	43625310	ENSG00000172432	6.4e-05	-	43624951	43625310	0	1	359,	0	-8.69	-9.66	-1.59
6	41906902	41906993	ENSG00000124641	0.17	-	41906902	41906993	0	1	91,	0	-1.37	-1.75	-1.55
6	26415065	26415216	ENSG00000026950	0.038	+	26415065	26415216	0	1	151,	0	-2.7	-3.26	-1.54
6	30704929	30705769	ENSG00000137337	0.0012	-	30704929	30705769	0	1	840,	0	-5.89	-6.71	-1.53
6	42208285	42210489	ENSG00000048544	0.0008	-	42208285	42210489	0	3	87,90,2,	0,572,2202	-6.29	-7.13	-1.53
6	34878359	34879654	ENSG00000064995	1.7e-07	-	34878359	34879654	0	2	361,29,	0,1266	-14.4	-15.6	-1.52
6	31830076	31830166	ENSG00000204388	0.099	+	31830076	31830166	0	1	90,	0	-1.86	-2.31	-1.51
6	83168042	83168133	ENSG00000013375	0.04	-	83168042	83168133	0	1	91,	0	-2.66	-3.21	-1.51
6	83168045	83168136	ENSG00000083097	0.046	+	83168045	83168136	0	1	91,	0	-2.55	-3.08	-1.48
6	88612669	88612849	ENSG00000111880	0.1	-	88612669	88612849	0	1	180,	0	-1.84	-2.29	-1.46
6	2948547	2948942	ENSG00000124570	0.15	-	2948547	2948942	0	2	152,29,	0,366	-1.48	-1.87	-1.45
6	99410735	99411809	ENSG00000132424	1e-09	-	99410735	99411809	0	2	257,74,	0,1000	-19.3	-20.7	-1.45
6	161049395	161049966	ENSG00000085511	0.18	+	161049395	161049966	0	1	571,	0	-1.35	-1.72	-1.44
6	43521354	43529257	ENSG00000171453	1.2e-05	+	43521354	43529257	0	2	172,9,	0,7894	-10.2	-11.3	-1.42
6	108683367	108683547	ENSG00000118689	0.18	+	108683367	108683547	0	1	180,	0	-1.36	-1.74	-1.42
6	33291653	33291803	ENSG00000237441	0.0002	-	33291653	33291803	0	1	150,	0	-7.62	-8.53	-1.42
6	151365256	151366066	ENSG00000181472	0.0018	-	151365256	151366066	0	1	810,	0	-5.51	-6.3	-1.42
6	33403902	33405103	ENSG00000237649	0.00012	+	33403902	33405103	0	2	227,252,	0,949	-8.08	-9.02	-1.4
6	63685532	63685803	ENSG00000118482	0.17	+	63685532	63685803	0	1	271,	0	-1.4	-1.78	-1.4
6	30743198	30744053	ENSG00000137331	2.3e-10	-	30743198	30744053	0	1	855,	0	-20.8	-22.2	-1.4
6	117563104	117566992	ENSG00000047932	0.0027	-	117563104	117566992	0	2	280,139,	0,3749	-5.14	-5.91	-1.4
6	89329683	89335328	ENSG00000198833	1.4e-14	-	89329683	89335328	0	3	274,120,27,	0,3402,5618	-30.2	-31.9	-1.39
6	127286857	127287818	ENSG00000118518	1.1e-10	+	127286857	127287818	0	1	961,	0	-21.5	-22.9	-1.38
6	26376641	26377361	ENSG00000186470	9.2e-06	+	26376641	26377361	0	1	720,	0	-10.5	-11.6	-1.36
6	24701408	24701793	ENSG00000272345	2.3e-14	-	24701408	24701793	0	1	385,	0	-29.8	-31.4	-1.36
6	157292500	157292921	ENSG00000215712	0.00099	-	157292500	157292921	0	1	421,	0	-6.09	-6.92	-1.36
6	34697262	34697470	ENSG00000272288	0.094	+	34697262	34697470	0	1	208,	0	-1.9	-2.36	-1.35
6	159749956	159755749	ENSG00000146457	2.3e-16	+	159749956	159755749	0	3	54,155,722,	0,3503,5071	-34.3	-36	-1.35
6	32976367	32976974	ENSG00000204256	1.2e-19	+	32976367	32976974	0	2	97,413,	0,194	-41.7	-43.6	-1.34
6	30616624	30616864	ENSG00000204569	0.093	-	30616624	30616864	0	1	240,	0	-1.91	-2.37	-1.34
6	33694292	33694442	ENSG00000137288	0.18	-	33694292	33694442	0	1	150,	0	-1.33	-1.7	-1.34
6	43027394	43033883	ENSG00000124541	1.9e-12	+	43027394	43033883	0	3	83,506,31,	0,1697,6458	-25.5	-27	-1.33
6	28244622	28247011	ENSG00000187626	6.8e-06	-	28244622	28247011	0	2	1353,43,	0,2346	-10.8	-11.9	-1.32
6	32845785	32846495	ENSG00000204261	3.5e-20	+	32845785	32846495	0	1	710,	0	-42.9	-44.8	-1.31
6	148543943	148544603	ENSG00000111961	0.14	+	148543943	148544603	0	1	660,	0	-1.53	-1.94	-1.3
6	17628838	17629199	ENSG00000124789	0.072	-	17628838	17629199	0	1	361,	0	-2.14	-2.63	-1.3
6	32191213	32191364	ENSG00000213654	3.1e-11	-	32191213	32191364	0	1	151,	0	-22.8	-24.2	-1.29
6	28911691	28914899	ENSG00000204713	0.12	-	28911691	28914899	0	2	27,124,	0,3084	-1.68	-2.11	-1.28
6	87258920	87260030	ENSG00000188994	0.0013	+	87258920	87260030	0	1	1110,	0	-5.84	-6.66	-1.27
6	89164605	89164756	ENSG00000146281	0.1	+	89164605	89164756	0	1	151,	0	-1.83	-2.27	-1.27
6	486116	486296	ENSG00000112685	0.1	-	486116	486296	0	1	180,	0	-1.84	-2.29	-1.27
6	32188819	32188970	ENSG00000204304	0.069	-	32188819	32188970	0	1	151,	0	-2.18	-2.68	-1.27
6	53268707	53269215	ENSG00000012660	2.3e-08	-	53268707	53269215	0	1	508,	0	-16.3	-17.6	-1.27
6	35426007	35426965	ENSG00000112033	2.3e-10	+	35426007	35426965	0	1	958,	0	-20.8	-22.2	-1.26
6	3019616	3019797	ENSG00000124588	0.11	+	3019616	3019797	0	1	181,	0	-1.76	-2.2	-1.25
6	31623830	31624481	ENSG00000204469	0.011	+	31623830	31624481	0	3	79,100,32,	0,430,619	-3.86	-4.53	-1.25
6	41097624	41098547	ENSG00000001167	0.00029	+	41097624	41098547	0	1	923,	0	-7.26	-8.16	-1.25
6	109465622	109466283	ENSG00000112365	0.093	-	109465622	109466283	0	1	661,	0	-1.92	-2.38	-1.25
6	32168072	32168281	ENSG00000241404	0.0033	+	32168072	32168281	0	1	209,	0	-4.97	-5.72	-1.24
6	57147482	57147932	ENSG00000112200	0.11	+	57147482	57147932	0	1	450,	0	-1.74	-2.18	-1.24
6	53498596	53498837	ENSG00000001084	0.16	-	53498596	53498837	0	1	241,	0	-1.45	-1.84	-1.24
6	33299693	33299933	ENSG00000231925	9.4e-15	-	33299693	33299933	0	1	240,	0	-30.7	-32.3	-1.23
6	133987222	133987403	ENSG00000028839	0.1	+	133987222	133987403	0	1	181,	0	-1.83	-2.28	-1.22
6	24698027	24701778	ENSG00000112304	1.5e-14	+	24698027	24701778	0	2	40,320,	0,3431	-30.2	-31.8	-1.21
6	4057181	4060844	ENSG00000112739	0.00025	+	4057181	4060844	0	3	6,163,432,	0,1546,3231	-7.39	-8.3	-1.2
6	27451188	27451575	ENSG00000096654	0.12	-	27451188	27451575	0	1	387,	0	-1.69	-2.11	-1.2
6	25983372	25983642	ENSG00000112343	0.00031	+	25983372	25983642	0	1	270,	0	-7.2	-8.09	-1.19
6	43778548	43778609	ENSG00000112715	0.074	+	43778548	43778609	0	1	61,	0	-2.12	-2.6	-1.18
6	137878702	137880199	ENSG00000118503	0.00013	+	137878702	137880199	0	2	649,129,	0,1368	-8.01	-8.95	-1.18
6	170571445	170572335	ENSG00000112592	0.075	+	170571445	170572335	0	2	59,150,	0,740	-2.1	-2.59	-1.17
6	39190820	39191298	ENSG00000164626	0.16	-	39190820	39191298	0	1	478,	0	-1.45	-1.84	-1.16
6	34590430	34606625	ENSG00000196821	0.18	-	34590430	34606625	0	2	170,71,	0,16124	-1.35	-1.72	-1.15
6	52264008	52264458	ENSG00000112118	2.9e-24	-	52264008	52264458	0	1	450,	0	-52.2	-54.2	-1.15
6	37174235	37174355	ENSG00000137193	2.1e-07	+	37174235	37174355	0	1	120,	0	-14.2	-15.4	-1.14
6	99412526	99414719	ENSG00000132424	0.00088	-	99412526	99414719	0	2	213,148,	0,2045	-6.2	-7.04	-1.14
6	167033961	167040104	ENSG00000213066	0.087	+	167033961	167040104	0	2	10,201,	0,5942	-1.98	-2.44	-1.13
6	30704209	30704420	ENSG00000137337	0.043	-	30704209	30704420	0	1	211,	0	-2.6	-3.14	-1.13
6	107871524	107876795	ENSG00000025796	2.1e-08	-	107871524	107876795	0	3	323,105,232,	0,1283,5039	-16.5	-17.7	-1.12
6	42890322	42890497	ENSG00000221821	0.17	-	42890322	42890497	0	1	175,	0	-1.39	-1.77	-1.11
6	15522800	15523100	ENSG00000047579	0.0012	-	15522800	15523100	0	1	300,	0	-5.92	-6.73	-1.1
6	24784115	24786069	ENSG00000112312	1.2e-07	+	24784115	24786069	0	3	54,111,432,	0,328,1522	-14.7	-15.9	-1.09
6	41932506	41933046	ENSG00000112578	4.6e-10	+	41932506	41933046	0	1	540,	0	-20.1	-21.5	-1.08
6	81746305	81746516	ENSG00000112773	0.14	-	81746305	81746516	0	1	211,	0	-1.56	-1.96	-1.08
6	87665818	87667453	ENSG00000135336	0.015	+	87665818	87667453	0	2	15,436,	0,1199	-3.55	-4.19	-1.07
6	143941824	143942423	ENSG00000118495	0.02	-	143941824	143942423	0	1	599,	0	-3.27	-3.89	-1.07
6	26393378	26393768	ENSG00000124508	0.1	+	26393378	26393768	0	1	390,	0	-1.84	-2.28	-1.06
6	109796802	109825428	ENSG00000112367	0.011	+	109796802	109825428	0	2	49,341,	0,28285	-3.84	-4.51	-1.05
6	57946073	57946464	ENSG00000215190	0.097	-	57946073	57946464	0	1	391,	0	-1.87	-2.33	-1.05
6	26392452	26393200	ENSG00000124508	0.015	+	26392452	26393200	0	1	748,	0	-3.54	-4.18	-1.04
6	135197158	135199041	ENSG00000118513	1.7e-06	+	135197158	135199041	0	2	165,134,	0,1749	-12.1	-13.3	-1.04
6	87254964	87255624	ENSG00000188994	0.15	+	87254964	87255624	0	1	660,	0	-1.48	-1.87	-1.03
6	30561273	30561723	ENSG00000204576	0.052	+	30561273	30561723	0	1	450,	0	-2.43	-2.95	-1.02
6	31577288	31577977	ENSG00000232810	1.1e-07	+	31577288	31577977	0	1	689,	0	-14.8	-16	-1.02
6	75663412	75670637	ENSG00000112701	0.0047	+	75663412	75670637	0	3	106,230,85,	0,3299,7140	-4.63	-5.36	-1.02
6	35833353	35833802	ENSG00000096063	4.6e-06	-	35833353	35833802	0	1	449,	0	-11.2	-12.3	-1.02
6	43011142	43011262	ENSG00000124733	0.18	-	43011142	43011262	0	1	120,	0	-1.35	-1.72	-1.02
6	26468006	26468692	ENSG00000112763	0.0035	+	26468006	26468692	0	1	686,	0	-4.9	-5.65	-1
6	30723536	30723867	ENSG00000196230	1.2e-29	+	30723536	30723867	0	1	331,	0	-64.4	-66.6	-1
6	43781965	43782146	ENSG00000112715	0.16	+	43781965	43782146	0	1	181,	0	-1.44	-1.83	-0.999
6	159798286	159798436	ENSG00000112110	6.8e-08	+	159798286	159798436	0	1	150,	0	-15.2	-16.5	-0.996
6	170581658	170582258	ENSG00000071994	0.0006	-	170581658	170582258	0	1	600,	0	-6.57	-7.42	-0.992
6	26468751	26476144	ENSG00000112763	0.00071	+	26468751	26476144	0	2	902,23,	0,7370	-6.41	-7.25	-0.991
6	30723549	30723877	ENSG00000272540	4.4e-28	-	30723549	30723877	0	1	328,	0	-60.9	-63	-0.987
6	43512155	43512276	ENSG00000137207	0.0046	-	43512155	43512276	0	1	121,	0	-4.66	-5.39	-0.987
6	149505356	149517542	ENSG00000131013	0.0054	-	149505356	149517542	0	3	348,148,189,	0,6798,11997	-4.5	-5.22	-0.963
6	35321501	35321771	ENSG00000023892	7.5e-07	+	35321501	35321771	0	1	270,	0	-13	-14.1	-0.95
6	10709020	10709752	ENSG00000111845	1.5e-05	+	10709020	10709752	0	2	56,515,	0,217	-10.1	-11.1	-0.941
6	169558342	169559331	ENSG00000184465	0.00022	-	169558342	169559331	0	1	989,	0	-7.53	-8.44	-0.937
6	107881130	107883287	ENSG00000025796	0.021	-	107881130	107883287	0	2	120,300,	0,1857	-3.22	-3.84	-0.934
6	36495500	36495769	ENSG00000112079	0.15	-	36495500	36495769	0	1	269,	0	-1.49	-1.89	-0.932
6	158192078	158192468	ENSG00000272047	5.6e-06	+	158192078	158192468	0	1	390,	0	-11	-12.1	-0.924
6	4954030	4954299	ENSG00000153046	0.16	+	4954030	4954299	0	1	269,	0	-1.45	-1.84	-0.923
6	106185903	106186503	ENSG00000057663	0.00024	-	106185903	106186503	0	1	600,	0	-7.45	-8.35	-0.923
6	44424567	44446782	ENSG00000096401	1.8e-05	+	44424567	44446782	0	6	16,81,243,198,213,176,	0,1535,1914,5145,21087,22039	-9.83	-10.9	-0.918
6	139373386	139373894	ENSG00000164442	6.4e-19	-	139373386	139373894	0	1	508,	0	-40	-41.9	-0.91
6	157206250	157208080	ENSG00000049618	0.0015	+	157206250	157208080	0	1	1830,	0	-5.72	-6.52	-0.909
6	169667369	169668628	ENSG00000184465	0.00019	-	169667369	169668628	0	1	1259,	0	-7.63	-8.55	-0.898
6	33772427	33772727	ENSG00000161904	0.0018	-	33772427	33772727	0	1	300,	0	-5.54	-6.33	-0.897
6	30688046	30688225	ENSG00000137404	0.023	-	30688046	30688225	0	1	179,	0	-3.17	-3.78	-0.889
6	90516300	90518486	ENSG00000135341	0.038	-	90516300	90518486	0	2	381,40,	0,2146	-2.71	-3.27	-0.889
6	26598539	26599166	ENSG00000146109	1.7e-09	+	26598539	26599166	0	1	627,	0	-18.9	-20.2	-0.888
6	152973950	152975620	ENSG00000112029	0.018	-	152973950	152975620	0	2	35,714,	0,956	-3.41	-4.03	-0.888
6	45547533	45548072	ENSG00000124813	0.1	+	45547533	45548072	0	1	539,	0	-1.81	-2.26	-0.886
6	43786127	43786487	ENSG00000112715	0.023	+	43786127	43786487	0	1	360,	0	-3.18	-3.79	-0.882
6	33249846	33250445	ENSG00000232940	0.014	+	33249846	33250445	0	2	43,167,	0,432	-3.6	-4.25	-0.877
6	117547912	117548541	ENSG00000164465	0.034	+	117547912	117548541	0	1	629,	0	-2.82	-3.39	-0.863
6	107883436	107893780	ENSG00000025796	0.028	-	107883436	107893780	0	2	31,299,	0,10045	-3	-3.58	-0.861
6	30724106	30724317	ENSG00000196230	2.8e-08	+	30724106	30724317	0	1	211,	0	-16.1	-17.4	-0.855
6	89636052	89636712	ENSG00000083099	0.0035	-	89636052	89636712	0	1	660,	0	-4.9	-5.65	-0.855
6	31764654	31765588	ENSG00000235663	0.12	-	31764654	31765588	0	2	66,50,	0,884	-1.72	-2.16	-0.853
6	29672451	29673406	ENSG00000204644	0.0038	-	29672451	29673406	0	1	955,	0	-4.83	-5.57	-0.838
6	35824039	35833784	ENSG00000197753	0.022	+	35824039	35833784	0	2	36,175,	0,9570	-3.21	-3.82	-0.835
6	32814178	32814593	ENSG00000241106	0.0057	-	32814178	32814593	0	1	415,	0	-4.45	-5.17	-0.827
6	28904437	28904766	ENSG00000204713	0.00031	-	28904437	28904766	0	1	329,	0	-7.18	-8.07	-0.826
6	33250271	33250451	ENSG00000223501	0.02	-	33250271	33250451	0	1	180,	0	-3.28	-3.89	-0.822
6	137197483	137197841	ENSG00000027697	0.0054	-	137197483	137197841	0	1	358,	0	-4.5	-5.22	-0.818
6	7411521	7417677	ENSG00000124784	0.0024	+	7411521	7417677	0	4	46,54,153,347,	0,1367,2716,5809	-5.27	-6.04	-0.808
6	31764610	31764821	ENSG00000255152	0.025	+	31764610	31764821	0	1	211,	0	-3.09	-3.69	-0.804
6	30727797	30727917	ENSG00000137312	0.00052	-	30727797	30727917	0	1	120,	0	-6.71	-7.56	-0.801
6	43336858	43338177	ENSG00000171467	0.0048	-	43336858	43338177	0	1	1319,	0	-4.6	-5.33	-0.796
6	31764611	31764821	ENSG00000228727	0.026	+	31764611	31764821	0	1	210,	0	-3.06	-3.65	-0.794
6	75702843	75711385	ENSG00000112701	0.0079	+	75702843	75711385	0	3	229,104,58,	0,6683,8484	-4.15	-4.84	-0.791
6	35857270	35870969	ENSG00000096063	0.091	-	35857270	35870969	0	5	98,129,420,214,36,	0,11739,12211,13010,13663	-1.94	-2.4	-0.789
6	32168055	32168235	ENSG00000258388	0.032	+	32168055	32168235	0	1	180,	0	-2.88	-3.45	-0.788
6	73517124	73517274	ENSG00000156508	0.1	-	73517124	73517274	0	1	150,	0	-1.82	-2.26	-0.784
6	6654654	6654983	ENSG00000112799	2.5e-13	+	6654654	6654983	0	1	329,	0	-27.4	-29	-0.768
6	31797754	31797814	ENSG00000204392	0.0065	-	31797754	31797814	0	1	60,	0	-4.32	-5.03	-0.768
6	52404156	52405473	ENSG00000170915	0.031	+	52404156	52405473	0	1	1317,	0	-2.89	-3.47	-0.761
6	30703239	30703761	ENSG00000137337	0.071	-	30703239	30703761	0	2	47,344,	0,178	-2.16	-2.65	-0.76
6	43625862	43626973	ENSG00000172432	0.15	-	43625862	43626973	0	3	2,185,52,	0,363,1059	-1.48	-1.88	-0.754
6	31410700	31412009	ENSG00000204520	0.13	+	31410700	31412009	0	3	97,288,63,	0,371,1246	-1.6	-2.02	-0.752
6	89643726	89644116	ENSG00000112159	0.018	-	89643726	89644116	0	1	390,	0	-3.41	-4.04	-0.752
6	43505237	43505807	ENSG00000137221	0.0016	+	43505237	43505807	0	1	570,	0	-5.63	-6.42	-0.748
6	75237822	75237971	ENSG00000112695	4.7e-16	-	75237822	75237971	0	1	149,	0	-33.6	-35.3	-0.745
6	35295326	35295776	ENSG00000065029	0.0016	+	35295326	35295776	0	1	450,	0	-5.64	-6.44	-0.737
6	42228106	42232718	ENSG00000124496	0.03	-	42228106	42232718	0	2	563,38,	0,4574	-2.94	-3.52	-0.734
6	32813825	32815052	ENSG00000250264	0.014	-	32813825	32815052	0	3	8,282,9,	0,494,1218	-3.62	-4.27	-0.732
6	37368519	37369839	ENSG00000112130	0.17	+	37368519	37369839	0	2	699,49,	0,1271	-1.38	-1.76	-0.726
6	32845208	32845537	ENSG00000168394	0.00029	-	32845208	32845537	0	1	329,	0	-7.25	-8.15	-0.72
6	7395106	7404505	ENSG00000124784	0.11	+	7395106	7404505	0	7	37,70,43,93,295,94,88,	0,1596,3591,5851,7496,8827,9311	-1.81	-2.25	-0.706
6	116277895	116279364	ENSG00000189241	0.017	-	116277895	116279364	0	1	1469,	0	-3.43	-4.06	-0.705
6	170546140	170549021	ENSG00000008018	0.00055	-	170546140	170549021	0	2	44,16,	0,2865	-6.65	-7.5	-0.698
6	31162634	31163054	ENSG00000137310	0.16	+	31162634	31163054	0	1	420,	0	-1.46	-1.85	-0.697
6	89652235	89664560	ENSG00000112159	0.0033	-	89652235	89664560	0	11	46,164,171,205,102,162,308,148,153,176,74,	0,756,1928,3528,4464,5973,6374,9195,9851,10556,12251	-4.94	-5.7	-0.679
6	71301492	71302272	ENSG00000119900	0.15	+	71301492	71302272	0	1	780,	0	-1.48	-1.87	-0.668
6	43511826	43512036	ENSG00000137207	0.018	-	43511826	43512036	0	1	210,	0	-3.37	-3.99	-0.649
6	31163353	31166317	ENSG00000137310	0.037	+	31163353	31166317	0	2	862,38,	0,2926	-2.73	-3.29	-0.635
6	151101617	151101887	ENSG00000120254	0.037	+	151101617	151101887	0	1	270,	0	-2.74	-3.3	-0.624
6	5109366	5113126	ENSG00000214113	0.14	-	5109366	5113126	0	2	125,56,	0,3704	-1.59	-2	-0.621
6	99400445	99402763	ENSG00000132424	1.6e-21	-	99400445	99402763	0	2	1185,224,	0,2094	-45.9	-47.9	-0.62
6	33315064	33315994	ENSG00000236104	0.042	-	33315064	33315994	0	1	930,	0	-2.63	-3.18	-0.616
6	32180615	32180793	ENSG00000204308	0.0049	+	32180615	32180793	0	1	178,	0	-4.58	-5.31	-0.611
6	78940543	78945442	ENSG00000146247	0.19	-	78940543	78945442	0	2	787,143,	0,4756	-1.32	-1.68	-0.61
6	144187214	144188192	ENSG00000135604	0.11	+	144187214	144188192	0	1	978,	0	-1.78	-2.22	-0.604
6	30653118	30654783	ENSG00000204560	0.032	-	30653118	30654783	0	2	252,78,	0,1587	-2.87	-3.44	-0.591
6	31625483	31625956	ENSG00000204469	0.12	+	31625483	31625956	0	2	128,203,	0,270	-1.73	-2.16	-0.588
6	87260179	87261948	ENSG00000188994	0.034	+	87260179	87261948	0	1	1769,	0	-2.81	-3.38	-0.585
6	30070183	30070333	ENSG00000204619	0.031	+	30070183	30070333	0	1	150,	0	-2.89	-3.46	-0.583
6	85612605	85614237	ENSG00000135316	0.0071	-	85612605	85614237	0	2	318,132,	0,1500	-4.25	-4.95	-0.583
6	33318557	33319111	ENSG00000204209	0.013	-	33318557	33319111	0	2	245,115,	0,439	-3.7	-4.35	-0.572
6	33304934	33308130	ENSG00000231925	0.034	-	33304934	33308130	0	2	453,26,	0,3170	-2.81	-3.38	-0.571
6	75253702	75254182	ENSG00000112697	0.00042	-	75253702	75254182	0	1	480,	0	-6.91	-7.78	-0.557
6	31631402	31631673	ENSG00000204469	0.086	+	31631402	31631673	0	1	271,	0	-1.98	-2.45	-0.542
6	32979770	32981236	ENSG00000204256	1.9e-13	+	32979770	32981236	0	2	694,655,	0,811	-27.7	-29.3	-0.542
6	31269490	31354106	ENSG00000234745	6.5e-29	-	31269490	31354106	0	2	35,235,	0,84381	-62.7	-64.9	-0.529
6	160106240	160106481	ENSG00000197081	0.046	+	160106240	160106481	0	1	241,	0	-2.55	-3.09	-0.518
6	31639027	31639208	ENSG00000204463	0.00087	-	31639027	31639208	0	1	181,	0	-6.22	-7.05	-0.517
6	127289755	127290174	ENSG00000093144	0.017	-	127289755	127290174	0	1	419,	0	-3.42	-4.05	-0.501
6	31839706	31839766	ENSG00000204387	0.01	+	31839706	31839766	0	1	60,	0	-3.88	-4.56	-0.499
6	13790753	13791977	ENSG00000050393	0.17	-	13790753	13791977	0	2	111,100,	0,1124	-1.41	-1.79	-0.499
6	36854826	36855094	ENSG00000137168	0.17	-	36854826	36855094	0	1	268,	0	-1.42	-1.8	-0.496
6	170577093	170577333	ENSG00000071994	0.14	-	170577093	170577333	0	1	240,	0	-1.56	-1.97	-0.495
6	110967652	110967890	ENSG00000155115	0.12	+	110967652	110967890	0	1	238,	0	-1.69	-2.11	-0.491
6	169703904	169703995	ENSG00000130024	0.049	-	169703904	169703995	0	1	91,	0	-2.49	-3.02	-0.486
6	33320797	33321128	ENSG00000204209	0.18	-	33320797	33321128	0	1	331,	0	-1.36	-1.73	-0.483
6	30590555	30591095	ENSG00000204574	0.0036	+	30590555	30591095	0	1	540,	0	-4.89	-5.64	-0.478
6	143427494	143427854	ENSG00000189007	0.097	-	143427494	143427854	0	1	360,	0	-1.87	-2.33	-0.47
6	75715401	75715912	ENSG00000112701	0.026	+	75715401	75715912	0	1	511,	0	-3.06	-3.66	-0.467
6	36687278	36687339	ENSG00000124762	0.08	+	36687278	36687339	0	1	61,	0	-2.05	-2.53	-0.455
6	73424516	73428723	ENSG00000164430	0.16	-	73424516	73428723	0	2	1062,15,	0,4192	-1.44	-1.83	-0.454
[truncated: 4,320 more rows]
