# Supplementary material for: Eltrombopag as an Allosteric Inhibitor of the METTL3-14 Complex Affecting the m6A Methylation of RNA in Acute Myeloid Leukemia Cells
Source: Pharmaceuticals (Basel). 2022 Apr 1;15(4):440. doi: 10.3390/ph15040440 (PMC9032718; doi:10.3390/ph15040440)
Supplement: Supplementary file 1 [file pharmaceuticals-15-00440-s001.zip › pharmaceuticals-1632371-supplementary/Supplementary Table S3.xlsx]

## Sheet: Hypomethylation
Supplementary Table S3. GO enrichment analysis of differentially m6A methylated genes. - Hypomethylation
Term	Definition	Count	%	PValue	Significance	Genes	List Total	Pop Hits	Pop Total	Fold Enrichment	Bonferroni	Benjamini	FDR
GO:0006351	transcription, DNA-templated	677	13.822	2.12073e-31	30.6735	ENSG00000185947, ENSG00000183647, ENSG00000116809, ENSG00000180257, ENSG00000182318, ENSG00000213024, ENSG00000186918, ENSG00000179388, ENSG00000113658, ENSG00000157110, ENSG00000111596, ENSG00000114861, ENSG00000196843, ENSG00000112561, ENSG00000171425, ENSG00000112200, ENSG00000075292, ENSG00000196967, ENSG00000197935, ENSG00000261221, ENSG00000172748, ENSG00000132170, ENSG00000168255, ENSG0000…	3986	1955	16792	1.45884	1.40838e-27	1.40838e-27	1.4018e-27
GO:0006355	regulation of transcription, DNA-templated	530	10.8207	2.74286e-26	25.5618	ENSG00000185947, ENSG00000183647, ENSG00000180257, ENSG00000182318, ENSG00000181222, ENSG00000111358, ENSG00000186918, ENSG00000179388, ENSG00000113658, ENSG00000157110, ENSG00000111596, ENSG00000112561, ENSG00000171425, ENSG00000075292, ENSG00000196967, ENSG00000197935, ENSG00000172748, ENSG00000100109, ENSG00000100105, ENSG00000148400, ENSG00000100462, ENSG00000250571, ENSG00000182568, ENSG0000…	3986	1504	16792	1.48454	1.82153e-22	9.10766e-23	9.06515e-23
GO:0006281	DNA repair	100	2.04165	2.8118e-10	9.55102	ENSG00000136936, ENSG00000174371, ENSG00000108469, ENSG00000111358, ENSG00000111875, ENSG00000197774, ENSG00000154920, ENSG00000159259, ENSG00000154767, ENSG00000248643, ENSG00000168411, ENSG00000115274, ENSG00000115392, ENSG00000166199, ENSG00000083642, ENSG00000100865, ENSG00000153827, ENSG00000169188, ENSG00000168496, ENSG00000153391, ENSG00000126215, ENSG00000177084, ENSG00000178295, ENSG0000…	3986	235	16792	1.79266	1.86732e-06	6.22439e-07	6.19534e-07
GO:0006974	cellular response to DNA damage stimulus	89	1.81707	2.10241e-09	8.67728	ENSG00000164808, ENSG00000114904, ENSG00000106009, ENSG00000197299, ENSG00000097007, ENSG00000111877, ENSG00000095787, ENSG00000175104, ENSG00000075131, ENSG00000152942, ENSG00000113456, ENSG00000197579, ENSG00000204590, ENSG00000114026, ENSG00000092470, ENSG00000139842, ENSG00000115392, ENSG00000107290, ENSG00000153827, ENSG00000251503, ENSG00000166439, ENSG00000125885, ENSG00000126215, ENSG0000…	3986	208	16792	1.80257	1.3962e-05	3.49053e-06	3.47424e-06
GO:0006260	DNA replication	68	1.38832	6.26103e-08	7.20335	ENSG00000174371, ENSG00000108469, ENSG00000197299, ENSG00000107815, ENSG00000111877, ENSG00000006634, ENSG00000075131, ENSG00000152942, ENSG00000113456, ENSG00000159259, ENSG00000248643, ENSG00000164053, ENSG00000160294, ENSG00000168496, ENSG00000100865, ENSG00000181938, ENSG00000125885, ENSG00000177084, ENSG00000140521, ENSG00000188827, ENSG00000122257, ENSG00000094804, ENSG00000133119, ENSG0000…	3986	155	16792	1.84817	0.000415709	8.31591e-05	8.27709e-05
GO:0032543	mitochondrial translation	24	0.489996	3.39333e-07	6.46937	ENSG00000239789, ENSG00000111639, ENSG00000122085, ENSG00000122140, ENSG00000112855, ENSG00000181991, ENSG00000173141, ENSG00000172586, ENSG00000266472, ENSG00000116898, ENSG00000074071, ENSG00000156469, ENSG00000170445, ENSG00000132300, ENSG00000096080, ENSG00000159111, ENSG00000187024, ENSG00000166902, ENSG00000128626, ENSG00000125445, ENSG00000062582, ENSG00000084092, ENSG00000011376, ENSG0000…	3986	36	16792	2.8085	0.00225097	0.000375585	0.000373832
GO:0000209	protein polyubiquitination	75	1.53124	4.48214e-07	6.34851	ENSG00000110429, ENSG00000001629, ENSG00000198742, ENSG00000175104, ENSG00000244687, ENSG00000197579, ENSG00000135722, ENSG00000136930, ENSG00000119401, ENSG00000099341, ENSG00000087448, ENSG00000086758, ENSG00000055130, ENSG00000056586, ENSG00000153827, ENSG00000101236, ENSG00000168936, ENSG00000109670, ENSG00000034677, ENSG00000122257, ENSG00000100023, ENSG00000163840, ENSG00000196470, ENSG0000…	3986	184	16792	1.71715	0.00297216	0.000425227	0.000423242
GO:0006914	autophagy	58	1.18416	8.24995e-07	6.08355	ENSG00000130479, ENSG00000132612, ENSG00000113734, ENSG00000097007, ENSG00000127580, ENSG00000175224, ENSG00000112561, ENSG00000152223, ENSG00000155975, ENSG00000171700, ENSG00000139644, ENSG00000040633, ENSG00000151532, ENSG00000139722, ENSG00000132256, ENSG00000116288, ENSG00000197969, ENSG00000160695, ENSG00000104142, ENSG00000185359, ENSG00000163565, ENSG00000130766, ENSG00000134242, ENSG0000…	3986	133	16792	1.83714	0.00546381	0.000684849	0.000681652
GO:0070126	mitochondrial translational termination	42	0.857493	1.04127e-06	5.98244	ENSG00000131368, ENSG00000172590, ENSG00000130312, ENSG00000185608, ENSG00000135900, ENSG00000111639, ENSG00000242485, ENSG00000171421, ENSG00000137547, ENSG00000266472, ENSG00000136897, ENSG00000278845, ENSG00000144029, ENSG00000116221, ENSG00000143436, ENSG00000055950, ENSG00000158042, ENSG00000159111, ENSG00000125445, ENSG00000062582, ENSG00000243927, ENSG00000239789, ENSG00000090263, ENSG0000…	3986	86	16792	2.05739	0.00689122	0.000739073	0.000735623
GO:0016567	protein ubiquitination	126	2.57248	1.11289e-06	5.95355	ENSG00000174010, ENSG00000105879, ENSG00000198742, ENSG00000099785, ENSG00000136536, ENSG00000198625, ENSG00000170852, ENSG00000119401, ENSG00000135686, ENSG00000119402, ENSG00000122779, ENSG00000142784, ENSG00000168411, ENSG00000100505, ENSG00000109790, ENSG00000163481, ENSG00000162032, ENSG00000013374, ENSG00000100225, ENSG00000109670, ENSG00000180008, ENSG00000175073, ENSG00000132109, ENSG0000…	3986	359	16792	1.47857	0.00736349	0.000739073	0.000735623
GO:0016032	viral process	108	2.20498	1.53279e-06	5.81452	ENSG00000168090, ENSG00000213024, ENSG00000114867, ENSG00000180370, ENSG00000136930, ENSG00000165025, ENSG00000114062, ENSG00000109670, ENSG00000126214, ENSG00000162676, ENSG00000182568, ENSG00000133318, ENSG00000132341, ENSG00000028116, ENSG00000196313, ENSG00000138443, ENSG00000101945, ENSG00000086102, ENSG00000179271, ENSG00000101146, ENSG00000254087, ENSG00000125810, ENSG00000167977, ENSG0000…	3986	299	16792	1.52166	0.0101276	0.000925387	0.000921067
GO:0043161	proteasome-mediated ubiquitin-dependent protein catabolic process	79	1.6129	1.88311e-06	5.72512	ENSG00000075218, ENSG00000104343, ENSG00000092871, ENSG00000118193, ENSG00000198742, ENSG00000082701, ENSG00000173960, ENSG00000197579, ENSG00000066427, ENSG00000136930, ENSG00000139842, ENSG00000099341, ENSG00000087448, ENSG00000100505, ENSG00000116044, ENSG00000055130, ENSG00000101236, ENSG00000011275, ENSG00000175197, ENSG00000196470, ENSG00000173692, ENSG00000196510, ENSG00000153107, ENSG0000…	3986	203	16792	1.63944	0.0124279	0.00104214	0.00103728
GO:0006396	RNA processing	45	0.918742	2.33265e-06	5.63215	ENSG00000075856, ENSG00000135900, ENSG00000123064, ENSG00000047188, ENSG00000067596, ENSG00000134815, ENSG00000157110, ENSG00000104824, ENSG00000171861, ENSG00000065457, ENSG00000004534, ENSG00000136875, ENSG00000130332, ENSG00000163660, ENSG00000100109, ENSG00000120158, ENSG00000005100, ENSG00000107290, ENSG00000160570, ENSG00000101138, ENSG00000100201, ENSG00000072756, ENSG00000160710, ENSG0000…	3986	97	16792	1.95437	0.0153718	0.0011654	0.00115996
GO:0051301	cell division	122	2.49081	2.46535e-06	5.60812	ENSG00000104147, ENSG00000114904, ENSG00000072864, ENSG00000132612, ENSG00000108469, ENSG00000135446, ENSG00000076382, ENSG00000117697, ENSG00000167842, ENSG00000087448, ENSG00000165660, ENSG00000083642, ENSG00000100106, ENSG00000100865, ENSG00000094804, ENSG00000129055, ENSG00000132341, ENSG00000117724, ENSG00000168303, ENSG00000186871, ENSG00000166483, ENSG00000138160, ENSG00000138161, ENSG0000…	3986	350	16792	1.46844	0.0162391	0.0011654	0.00115996
GO:0045892	negative regulation of transcription, DNA-templated	164	3.34831	2.63228e-06	5.57967	ENSG00000105993, ENSG00000115318, ENSG00000175104, ENSG00000171940, ENSG00000196843, ENSG00000269343, ENSG00000114861, ENSG00000138433, ENSG00000122779, ENSG00000087206, ENSG00000132170, ENSG00000267680, ENSG00000100105, ENSG00000078699, ENSG00000148400, ENSG00000032219, ENSG00000162676, ENSG00000136826, ENSG00000175197, ENSG00000196792, ENSG00000156650, ENSG00000105229, ENSG00000112312, ENSG0000…	3986	499	16792	1.38455	0.0173291	0.0011654	0.00115996
GO:0000086	G2/M transition of mitotic cell cycle	57	1.16374	6.02249e-06	5.22022	ENSG00000072864, ENSG00000046651, ENSG00000116127, ENSG00000117650, ENSG00000055130, ENSG00000151849, ENSG00000160014, ENSG00000188229, ENSG00000127824, ENSG00000160299, ENSG00000147874, ENSG00000165304, ENSG00000106477, ENSG00000112877, ENSG00000196230, ENSG00000136861, ENSG00000074054, ENSG00000150991, ENSG00000170027, ENSG00000166167, ENSG00000173846, ENSG00000166483, ENSG00000127914, ENSG0000…	3986	137	16792	1.75275	0.0392062	0.00239149	0.00238032
GO:0070125	mitochondrial translational elongation	40	0.81666	6.12186e-06	5.21312	ENSG00000131368, ENSG00000172590, ENSG00000130312, ENSG00000185608, ENSG00000135900, ENSG00000111639, ENSG00000242485, ENSG00000171421, ENSG00000137547, ENSG00000266472, ENSG00000136897, ENSG00000278845, ENSG00000144029, ENSG00000116221, ENSG00000143436, ENSG00000055950, ENSG00000158042, ENSG00000159111, ENSG00000125445, ENSG00000062582, ENSG00000243927, ENSG00000239789, ENSG00000090263, ENSG0000…	3986	85	16792	1.98247	0.03984	0.00239149	0.00238032
GO:0006915	apoptotic process	179	3.65455	1.39503e-05	4.85542	ENSG00000092871, ENSG00000075213, ENSG00000172113, ENSG00000180370, ENSG00000110422, ENSG00000099385, ENSG00000082397, ENSG00000145779, ENSG00000101439, ENSG00000151923, ENSG00000119408, ENSG00000184584, ENSG00000169100, ENSG00000121966, ENSG00000160255, ENSG00000162711, ENSG00000165304, ENSG00000175197, ENSG00000112679, ENSG00000133318, ENSG00000171791, ENSG00000155849, ENSG00000136305, ENSG0000…	3986	567	16792	1.32995	0.0884825	0.00514688	0.00512285
GO:0010803	regulation of tumor necrosis factor-mediated signaling pathway	19	0.387913	2.31688e-05	4.6351	ENSG00000154124, ENSG00000104365, ENSG00000103490, ENSG00000064012, ENSG00000110514, ENSG00000179526, ENSG00000150991, ENSG00000110330, ENSG00000170315, ENSG00000137275, ENSG00000165025, ENSG00000118503, ENSG00000083799, ENSG00000125826, ENSG00000232810, ENSG00000067182, ENSG00000204628, ENSG00000102871, ENSG00000176170	3986	30	16792	2.66807	0.142613	0.0080981	0.0080603
GO:0007049	cell cycle	79	1.6129	3.18864e-05	4.49639	ENSG00000072786, ENSG00000156345, ENSG00000155254, ENSG00000177683, ENSG00000150764, ENSG00000112245, ENSG00000075131, ENSG00000152942, ENSG00000138758, ENSG00000106608, ENSG00000159259, ENSG00000114383, ENSG00000135164, ENSG00000169188, ENSG00000100865, ENSG00000255302, ENSG00000103056, ENSG00000196470, ENSG00000131931, ENSG00000132109, ENSG00000107968, ENSG00000112312, ENSG00000132780, ENSG0000…	3986	217	16792	1.53367	0.190842	0.0105879	0.0105385
GO:0030488	tRNA methylation	17	0.34708	4.28752e-05	4.36779	ENSG00000089195, ENSG00000155275, ENSG00000162639, ENSG00000068438, ENSG00000135297, ENSG00000134077, ENSG00000136932, ENSG00000130299, ENSG00000160193, ENSG00000145337, ENSG00000037897, ENSG00000122435, ENSG00000087995, ENSG00000138050, ENSG00000165055, ENSG00000166166, ENSG00000168806	3986	26	16792	2.75449	0.24779	0.0135588	0.0134955
GO:0007067	mitotic nuclear division	87	1.77624	5.86718e-05	4.23157	ENSG00000114904, ENSG00000104147, ENSG00000108469, ENSG00000213024, ENSG00000198783, ENSG00000097007, ENSG00000046651, ENSG00000075131, ENSG00000117697, ENSG00000167842, ENSG00000087448, ENSG00000117650, ENSG00000184661, ENSG00000119408, ENSG00000119969, ENSG00000100106, ENSG00000154839, ENSG00000251503, ENSG00000091732, ENSG00000147874, ENSG00000146425, ENSG00000094804, ENSG00000185515, ENSG0000…	3986	248	16792	1.47786	0.322707	0.0177109	0.0176282
GO:1901796	regulation of signal transduction by p53 class mediator	50	1.02082	6.3371e-05	4.19811	ENSG00000174371, ENSG00000156983, ENSG00000071655, ENSG00000197299, ENSG00000152942, ENSG00000113456, ENSG00000198625, ENSG00000083168, ENSG00000122779, ENSG00000164053, ENSG00000100462, ENSG00000089022, ENSG00000133119, ENSG00000070770, ENSG00000150991, ENSG00000148835, ENSG00000173846, ENSG00000112592, ENSG00000166164, ENSG00000088325, ENSG00000185386, ENSG00000152409, ENSG00000165632, ENSG0000…	3986	124	16792	1.69869	0.343518	0.0182977	0.0182123
GO:1900034	regulation of cellular response to heat	34	0.694161	8.69166e-05	4.0609	ENSG00000105993, ENSG00000093000, ENSG00000149196, ENSG00000204390, ENSG00000213024, ENSG00000148660, ENSG00000112208, ENSG00000204673, ENSG00000082701, ENSG00000158941, ENSG00000080824, ENSG00000151929, ENSG00000138750, ENSG00000109971, ENSG00000058804, ENSG00000167965, ENSG00000120694, ENSG00000110713, ENSG00000175054, ENSG00000108953, ENSG00000198793, ENSG00000196313, ENSG00000136243, ENSG0000…	3986	75	16792	1.90978	0.438553	0.0230885	0.0229808
GO:0090305	nucleic acid phosphodiester bond hydrolysis	34	0.694161	8.69166e-05	4.0609	ENSG00000181026, ENSG00000152684, ENSG00000130997, ENSG00000178199, ENSG00000197774, ENSG00000157014, ENSG00000020922, ENSG00000157036, ENSG00000113456, ENSG00000154920, ENSG00000198924, ENSG00000118655, ENSG00000034533, ENSG00000187790, ENSG00000169188, ENSG00000121988, ENSG00000168496, ENSG00000177084, ENSG00000148300, ENSG00000178295, ENSG00000160117, ENSG00000140521, ENSG00000149218, ENSG0000…	3986	75	16792	1.90978	0.438553	0.0230885	0.0229808
GO:0036297	interstrand cross-link repair	25	0.510412	0.000102895	3.98761	ENSG00000130997, ENSG00000131944, ENSG00000012061, ENSG00000162607, ENSG00000154920, ENSG00000198924, ENSG00000118655, ENSG00000187790, ENSG00000115392, ENSG00000164053, ENSG00000251503, ENSG00000126215, ENSG00000188827, ENSG00000175054, ENSG00000175595, ENSG00000175279, ENSG00000150991, ENSG00000152457, ENSG00000170315, ENSG00000112130, ENSG00000164002, ENSG00000183161, ENSG00000187741, ENSG0000…	3986	49	16792	2.14936	0.495083	0.0262818	0.0261591
GO:0008380	RNA splicing	62	1.26582	0.000108461	3.96473	ENSG00000185946, ENSG00000213782, ENSG00000092199, ENSG00000067596, ENSG00000109917, ENSG00000120948, ENSG00000197976, ENSG00000113575, ENSG00000138433, ENSG00000111196, ENSG00000075292, ENSG00000156469, ENSG00000173914, ENSG00000100109, ENSG00000116560, ENSG00000109111, ENSG00000161981, ENSG00000130520, ENSG00000104897, ENSG00000070495, ENSG00000108819, ENSG00000139218, ENSG00000116954, ENSG0000…	3986	166	16792	1.57343	0.513408	0.0266774	0.0265529
GO:0043065	positive regulation of apoptotic process	100	2.04165	0.000150542	3.82234	ENSG00000097007, ENSG00000115317, ENSG00000175104, ENSG00000131089, ENSG00000135446, ENSG00000035681, ENSG00000148400, ENSG00000165304, ENSG00000175592, ENSG00000113761, ENSG00000038382, ENSG00000174307, ENSG00000196712, ENSG00000139132, ENSG00000118689, ENSG00000141682, ENSG00000123358, ENSG00000102871, ENSG00000101265, ENSG00000071994, ENSG00000144381, ENSG00000068745, ENSG00000168395, ENSG0000…	3986	300	16792	1.40425	0.632057	0.0357054	0.0355387
GO:0007005	mitochondrion organization	34	0.694161	0.000161156	3.79275	ENSG00000129003, ENSG00000089041, ENSG00000136758, ENSG00000107815, ENSG00000114867, ENSG00000049883, ENSG00000196365, ENSG00000167085, ENSG00000115317, ENSG00000142082, ENSG00000179526, ENSG00000197912, ENSG00000135049, ENSG00000172115, ENSG00000177427, ENSG00000116288, ENSG00000165240, ENSG00000148840, ENSG00000127989, ENSG00000104064, ENSG00000162851, ENSG00000245848, ENSG00000106459, ENSG0000…	3986	77	16792	1.86017	0.657102	0.0369046	0.0367324
GO:0006977	DNA damage response, signal transduction by p53 class mediator resulting in cell cycle arrest	29	0.592078	0.000169583	3.77062	ENSG00000075218, ENSG00000090097, ENSG00000111596, ENSG00000134057, ENSG00000118495, ENSG00000198625, ENSG00000080802, ENSG00000151849, ENSG00000088038, ENSG00000149115, ENSG00000185499, ENSG00000101412, ENSG00000087586, ENSG00000140464, ENSG00000145632, ENSG00000198176, ENSG00000132646, ENSG00000135679, ENSG00000116717, ENSG00000205250, ENSG00000113300, ENSG00000150991, ENSG00000170855, ENSG0000…	3986	62	16792	1.97048	0.675768	0.03754	0.0373648
GO:0007249	I-kappaB kinase/NF-kappaB signaling	28	0.571662	0.000236903	3.62543	ENSG00000104365, ENSG00000175104, ENSG00000179526, ENSG00000167984, ENSG00000251201, ENSG00000168256, ENSG00000125826, ENSG00000142867, ENSG00000127666, ENSG00000157625, ENSG00000104312, ENSG00000074696, ENSG00000197885, ENSG00000150991, ENSG00000110330, ENSG00000170315, ENSG00000137275, ENSG00000168884, ENSG00000136560, ENSG00000255833, ENSG00000232810, ENSG00000109320, ENSG00000163877, ENSG0000…	3986	60	16792	1.96595	0.792673	0.0507506	0.0505137
GO:0008033	tRNA processing	20	0.40833	0.000245705	3.60959	ENSG00000174173, ENSG00000258790, ENSG00000104356, ENSG00000090861, ENSG00000198874, ENSG00000065457, ENSG00000135297, ENSG00000043514, ENSG00000110060, ENSG00000113272, ENSG00000100416, ENSG00000167112, ENSG00000177192, ENSG00000105171, ENSG00000091127, ENSG00000183665, ENSG00000255561, ENSG00000277149, ENSG00000148688, ENSG00000031698, ENSG00000100890	3986	37	16792	2.27716	0.804447	0.0509914	0.0507534
GO:0000122	negative regulation of transcription from RNA polymerase II promoter	212	4.3283	0.000254156	3.5949	ENSG00000111596, ENSG00000175104, ENSG00000114861, ENSG00000142784, ENSG00000132170, ENSG00000164690, ENSG00000148400, ENSG00000106443, ENSG00000182568, ENSG00000106554, ENSG00000112679, ENSG00000113649, ENSG00000105229, ENSG00000152455, ENSG00000135334, ENSG00000186350, ENSG00000151917, ENSG00000164463, ENSG00000196705, ENSG00000173846, ENSG00000118689, ENSG00000100219, ENSG00000100697, ENSG0000…	3986	720	16792	1.24042	0.815123	0.0511469	0.0509081
GO:0006397	mRNA processing	64	1.30666	0.000340572	3.46779	ENSG00000070047, ENSG00000213782, ENSG00000049883, ENSG00000104824, ENSG00000109917, ENSG00000120948, ENSG00000170892, ENSG00000197976, ENSG00000151014, ENSG00000138433, ENSG00000111196, ENSG00000173914, ENSG00000100109, ENSG00000116560, ENSG00000109111, ENSG00000122257, ENSG00000100461, ENSG00000136709, ENSG00000104897, ENSG00000070495, ENSG00000139218, ENSG00000111786, ENSG00000170860, ENSG0000…	3986	179	16792	1.50623	0.895871	0.0665217	0.0662112
GO:0006367	transcription initiation from RNA polymerase II promoter	56	1.14332	0.000360911	3.4426	ENSG00000153234, ENSG00000181222, ENSG00000111358, ENSG00000137947, ENSG00000175221, ENSG00000204231, ENSG00000120798, ENSG00000163882, ENSG00000132170, ENSG00000163161, ENSG00000161021, ENSG00000148400, ENSG00000272047, ENSG00000133997, ENSG00000111424, ENSG00000112237, ENSG00000112033, ENSG00000133398, ENSG00000186350, ENSG00000148835, ENSG00000174738, ENSG00000112592, ENSG00000144231, ENSG0000…	3986	152	16792	1.55206	0.909032	0.0684804	0.0681607
GO:0000398	mRNA splicing, via spliceosome	76	1.55165	0.000415049	3.3819	ENSG00000075856, ENSG00000185946, ENSG00000092199, ENSG00000181222, ENSG00000067596, ENSG00000157110, ENSG00000077312, ENSG00000104824, ENSG00000119203, ENSG00000138231, ENSG00000100109, ENSG00000163882, ENSG00000161981, ENSG00000149532, ENSG00000106245, ENSG00000130520, ENSG00000140829, ENSG00000153187, ENSG00000104897, ENSG00000141759, ENSG00000111786, ENSG00000170860, ENSG00000142252, ENSG0000…	3986	222	16792	1.4422	0.936513	0.076565	0.0762076
GO:0045893	positive regulation of transcription, DNA-templated	156	3.18497	0.000450324	3.34648	ENSG00000124151, ENSG00000116809, ENSG00000114904, ENSG00000180530, ENSG00000213024, ENSG00000175221, ENSG00000090971, ENSG00000113658, ENSG00000132570, ENSG00000244687, ENSG00000112561, ENSG00000078043, ENSG00000122779, ENSG00000132170, ENSG00000164690, ENSG00000148400, ENSG00000176390, ENSG00000072736, ENSG00000136826, ENSG00000175197, ENSG00000103044, ENSG00000128245, ENSG00000156650, ENSG0000…	3986	515	16792	1.27609	0.949776	0.080827	0.0804497
GO:0051726	regulation of cell cycle	47	0.959575	0.000565942	3.24723	ENSG00000156345, ENSG00000070444, ENSG00000104885, ENSG00000132436, ENSG00000155111, ENSG00000099860, ENSG00000134057, ENSG00000177606, ENSG00000171223, ENSG00000120948, ENSG00000171862, ENSG00000159692, ENSG00000120539, ENSG00000100029, ENSG00000186787, ENSG00000105173, ENSG00000147854, ENSG00000127564, ENSG00000101057, ENSG00000109971, ENSG00000197381, ENSG00000130522, ENSG00000132964, ENSG0000…	3986	124	16792	1.59677	0.976704	0.0989059	0.0984442
GO:0032088	negative regulation of NF-kappaB transcription factor activity	30	0.612495	0.0010099	2.99572	ENSG00000239732, ENSG00000154124, ENSG00000131323, ENSG00000103490, ENSG00000167984, ENSG00000125826, ENSG00000160310, ENSG00000162711, ENSG00000187555, ENSG00000142405, ENSG00000103037, ENSG00000105298, ENSG00000162676, ENSG00000178685, ENSG00000136826, ENSG00000134744, ENSG00000132109, ENSG00000122481, ENSG00000105229, ENSG00000112977, ENSG00000112851, ENSG00000196975, ENSG00000197329, ENSG0000…	3986	71	16792	1.78003	0.998782	0.171968	0.171166
GO:0007059	chromosome segregation	29	0.592078	0.00105496	2.97676	ENSG00000104147, ENSG00000072864, ENSG00000180198, ENSG00000122390, ENSG00000171320, ENSG00000138778, ENSG00000165480, ENSG00000076382, ENSG00000130695, ENSG00000167842, ENSG00000117650, ENSG00000102901, ENSG00000184661, ENSG00000165660, ENSG00000119408, ENSG00000166451, ENSG00000154839, ENSG00000149636, ENSG00000136861, ENSG00000117724, ENSG00000113580, ENSG00000138160, ENSG00000145241, ENSG0000…	3986	68	16792	1.79661	0.999097	0.17515	0.174333
GO:0007050	cell cycle arrest	51	1.04124	0.00109375	2.96108	ENSG00000090097, ENSG00000178252, ENSG00000097007, ENSG00000139842, ENSG00000055130, ENSG00000180447, ENSG00000167965, ENSG00000175197, ENSG00000116717, ENSG00000108819, ENSG00000116954, ENSG00000171867, ENSG00000083750, ENSG00000100614, ENSG00000108094, ENSG00000152409, ENSG00000168826, ENSG00000132819, ENSG00000087074, ENSG00000163697, ENSG00000141564, ENSG00000154144, ENSG00000095002, ENSG0000…	3986	141	16792	1.52376	0.999302	0.17716	0.176333
GO:0031297	replication fork processing	15	0.306247	0.00142267	2.8469	ENSG00000132646, ENSG00000197299, ENSG00000146263, ENSG00000134452, ENSG00000197774, ENSG00000175279, ENSG00000170364, ENSG00000154920, ENSG00000138375, ENSG00000079134, ENSG00000187790, ENSG00000251503, ENSG00000121988, ENSG00000164306, ENSG00000038219	3986	27	16792	2.34041	0.999922	0.219225	0.218202
GO:0006895	Golgi to endosome transport	12	0.244998	0.0014421	2.84101	ENSG00000129003, ENSG00000197969, ENSG00000204070, ENSG00000142197, ENSG00000196961, ENSG00000076321, ENSG00000117280, ENSG00000152291, ENSG00000083097, ENSG00000089177, ENSG00000107862, ENSG00000221838	3986	19	16792	2.66068	0.999931	0.219225	0.218202
GO:0042787	protein ubiquitination involved in ubiquitin-dependent protein catabolic process	54	1.10249	0.00145248	2.83789	ENSG00000001629, ENSG00000092871, ENSG00000174010, ENSG00000198742, ENSG00000151893, ENSG00000139842, ENSG00000119401, ENSG00000086758, ENSG00000055130, ENSG00000147912, ENSG00000118518, ENSG00000153827, ENSG00000100225, ENSG00000101236, ENSG00000145332, ENSG00000034677, ENSG00000122257, ENSG00000196470, ENSG00000092148, ENSG00000196510, ENSG00000069869, ENSG00000153107, ENSG00000116514, ENSG0000…	3986	153	16792	1.48685	0.999936	0.219225	0.218202
GO:0000082	G1/S transition of mitotic cell cycle	39	0.796243	0.00149384	2.8257	ENSG00000099901, ENSG00000135503, ENSG00000099804, ENSG00000148660, ENSG00000123080, ENSG00000180198, ENSG00000112029, ENSG00000172273, ENSG00000006634, ENSG00000131023, ENSG00000151893, ENSG00000135446, ENSG00000139842, ENSG00000055130, ENSG00000085840, ENSG00000125885, ENSG00000105173, ENSG00000177084, ENSG00000127564, ENSG00000094804, ENSG00000033800, ENSG00000176390, ENSG00000145632, ENSG0000…	3986	102	16792	1.61076	0.999951	0.220457	0.219428
GO:0006338	chromatin remodeling	34	0.694161	0.00168511	2.77337	ENSG00000163939, ENSG00000125482, ENSG00000213246, ENSG00000076108, ENSG00000119042, ENSG00000080503, ENSG00000117713, ENSG00000198604, ENSG00000136997, ENSG00000171316, ENSG00000115274, ENSG00000010803, ENSG00000109111, ENSG00000153391, ENSG00000274049, ENSG00000123562, ENSG00000182568, ENSG00000173011, ENSG00000165609, ENSG00000139613, ENSG00000153922, ENSG00000152455, ENSG00000049618, ENSG0000…	3986	86	16792	1.6655	0.999986	0.243279	0.242143
GO:0032436	positive regulation of proteasomal ubiquitin-dependent protein catabolic process	27	0.551245	0.00197444	2.70456	ENSG00000001629, ENSG00000082701, ENSG00000213923, ENSG00000141551, ENSG00000001084, ENSG00000013374, ENSG00000087586, ENSG00000101255, ENSG00000034677, ENSG00000180008, ENSG00000033800, ENSG00000145632, ENSG00000245848, ENSG00000135679, ENSG00000158717, ENSG00000171150, ENSG00000173334, ENSG00000167196, ENSG00000116514, ENSG00000177479, ENSG00000080815, ENSG00000204389, ENSG00000116030, ENSG0000…	3986	64	16792	1.77725	0.999998	0.273992	0.272713
GO:0016925	protein sumoylation	43	0.877909	0.00201009	2.69679	ENSG00000093000, ENSG00000092199, ENSG00000213024, ENSG00000112701, ENSG00000197299, ENSG00000197579, ENSG00000111752, ENSG00000002016, ENSG00000154767, ENSG00000078043, ENSG00000112200, ENSG00000172845, ENSG00000119866, ENSG00000138750, ENSG00000010803, ENSG00000163029, ENSG00000100401, ENSG00000101972, ENSG00000089685, ENSG00000033800, ENSG00000140464, ENSG00000058804, ENSG00000110713, ENSG0000…	3986	117	16792	1.54827	0.999998	0.273992	0.272713
GO:0006468	protein phosphorylation	136	2.77664	0.00204492	2.68932	ENSG00000114904, ENSG00000113658, ENSG00000180370, ENSG00000082701, ENSG00000110422, ENSG00000138399, ENSG00000173327, ENSG00000135446, ENSG00000143479, ENSG00000165025, ENSG00000119408, ENSG00000163482, ENSG00000124279, ENSG00000106683, ENSG00000058729, ENSG00000162434, ENSG00000115825, ENSG00000173334, ENSG00000028116, ENSG00000038382, ENSG00000020633, ENSG00000154237, ENSG00000173846, ENSG0000…	3986	456	16792	1.25643	0.999999	0.273992	0.272713
GO:0006357	regulation of transcription from RNA polymerase II promoter	132	2.69498	0.00206288	2.68553	ENSG00000125482, ENSG00000180530, ENSG00000178177, ENSG00000175221, ENSG00000186918, ENSG00000105516, ENSG00000111596, ENSG00000196843, ENSG00000114861, ENSG00000138433, ENSG00000261221, ENSG00000167685, ENSG00000146109, ENSG00000135164, ENSG00000188786, ENSG00000151923, ENSG00000032219, ENSG00000123066, ENSG00000072736, ENSG00000175592, ENSG00000112715, ENSG00000198176, ENSG00000237765, ENSG0000…	3986	441	16792	1.26096	0.999999	0.273992	0.272713
GO:0042771	intrinsic apoptotic signaling pathway in response to DNA damage by p53 class mediator	16	0.326664	0.00236834	2.62556	ENSG00000110108, ENSG00000181026, ENSG00000095002, ENSG00000139618, ENSG00000103490, ENSG00000197579, ENSG00000174307, ENSG00000141682, ENSG00000100603, ENSG00000096717, ENSG00000078304, ENSG00000089486, ENSG00000127334, ENSG00000163565, ENSG00000168209, ENSG00000140464	3986	31	16792	2.17432	1	0.308395	0.306956
GO:0043984	histone H4-K16 acetylation	12	0.244998	0.00252093	2.59844	ENSG00000136504, ENSG00000025293, ENSG00000120071, ENSG00000188895, ENSG00000147162, ENSG00000043143, ENSG00000077684, ENSG00000114982, ENSG00000139620, ENSG00000102221, ENSG00000118058, ENSG00000174579	3986	20	16792	2.52765	1	0.317174	0.315694
GO:0002218	activation of innate immune response	8	0.163332	0.00253128	2.59666	ENSG00000164430, ENSG00000088888, ENSG00000103490, ENSG00000184584, ENSG00000169375, ENSG00000189403, ENSG00000163565, ENSG00000132256	3986	10	16792	3.3702	1	0.317174	0.315694
GO:0015031	protein transport	119	2.42956	0.00270553	2.56775	ENSG00000051009, ENSG00000158604, ENSG00000132612, ENSG00000105514, ENSG00000185829, ENSG00000111237, ENSG00000114988, ENSG00000138674, ENSG00000155975, ENSG00000157191, ENSG00000124839, ENSG00000154917, ENSG00000145817, ENSG00000213380, ENSG00000108587, ENSG00000167208, ENSG00000144566, ENSG00000126062, ENSG00000117724, ENSG00000100219, ENSG00000184178, ENSG00000117280, ENSG00000164902, ENSG0000…	3986	395	16792	1.26916	1	0.33273	0.331177
GO:0006511	ubiquitin-dependent protein catabolic process	61	1.24541	0.0028221	2.54943	ENSG00000099901, ENSG00000092871, ENSG00000197579, ENSG00000066427, ENSG00000139842, ENSG00000055130, ENSG00000114062, ENSG00000138592, ENSG00000013374, ENSG00000090686, ENSG00000100225, ENSG00000183579, ENSG00000182446, ENSG00000196470, ENSG00000170185, ENSG00000112234, ENSG00000115464, ENSG00000135093, ENSG00000166167, ENSG00000100219, ENSG00000125818, ENSG00000083799, ENSG00000108094, ENSG0000…	3986	182	16792	1.41196	1	0.340755	0.339165
GO:0000083	regulation of transcription involved in G1/S transition of mitotic cell cycle	13	0.265414	0.00290567	2.53675	ENSG00000132646, ENSG00000112029, ENSG00000172273, ENSG00000172059, ENSG00000205250, ENSG00000169016, ENSG00000149308, ENSG00000085840, ENSG00000141867, ENSG00000105173, ENSG00000167513, ENSG00000094804, ENSG00000162676	3986	23	16792	2.38112	1	0.344581	0.342972
GO:2001238	positive regulation of extrinsic apoptotic signaling pathway	14	0.285831	0.00318713	2.4966	ENSG00000068001, ENSG00000103490, ENSG00000006327, ENSG00000180370, ENSG00000111321, ENSG00000248871, ENSG00000137275, ENSG00000083799, ENSG00000123689, ENSG00000160570, ENSG00000125826, ENSG00000142867, ENSG00000015475, ENSG00000140464	3986	26	16792	2.2684	1	0.371328	0.369595
GO:0007062	sister chromatid cohesion	38	0.775827	0.00354547	2.45033	ENSG00000077935, ENSG00000072864, ENSG00000147099, ENSG00000130779, ENSG00000138778, ENSG00000112941, ENSG00000020922, ENSG00000117697, ENSG00000167842, ENSG00000120334, ENSG00000121621, ENSG00000102901, ENSG00000083642, ENSG00000166451, ENSG00000154839, ENSG00000251503, ENSG00000100401, ENSG00000184445, ENSG00000101972, ENSG00000109670, ENSG00000108384, ENSG00000089685, ENSG00000161888, ENSG0000…	3986	103	16792	1.55422	1	0.405956	0.404061
GO:0048478	replication fork protection	6	0.122499	0.00361705	2.44165	ENSG00000198783, ENSG00000139618, ENSG00000197299, ENSG00000121988, ENSG00000134452, ENSG00000075131	3986	6	16792	4.21274	1	0.407133	0.405232
GO:0006909	phagocytosis	21	0.428746	0.00445958	2.35071	ENSG00000179348, ENSG00000128271, ENSG00000155849, ENSG00000076662, ENSG00000005844, ENSG00000197622, ENSG00000241399, ENSG00000261371, ENSG00000158985, ENSG00000114383, ENSG00000101337, ENSG00000160255, ENSG00000166428, ENSG00000125810, ENSG00000086232, ENSG00000117090, ENSG00000105352, ENSG00000143398, ENSG00000079805, ENSG00000144566, ENSG00000105376	3986	48	16792	1.84308	1	0.493601	0.491297
GO:0000724	double-strand break repair via homologous recombination	29	0.592078	0.00458722	2.33845	ENSG00000164808, ENSG00000108469, ENSG00000130997, ENSG00000197299, ENSG00000146263, ENSG00000111877, ENSG00000134452, ENSG00000020922, ENSG00000116560, ENSG00000188486, ENSG00000168496, ENSG00000163029, ENSG00000126215, ENSG00000125885, ENSG00000108384, ENSG00000178295, ENSG00000188827, ENSG00000139618, ENSG00000175595, ENSG00000214941, ENSG00000175854, ENSG00000005156, ENSG00000173559, ENSG0000…	3986	74	16792	1.65094	1	0.499406	0.497075
GO:0006362	transcription elongation from RNA polymerase I promoter	15	0.306247	0.00496581	2.30401	ENSG00000111358, ENSG00000068654, ENSG00000117877, ENSG00000171453, ENSG00000177700, ENSG00000115750, ENSG00000225830, ENSG00000112592, ENSG00000186184, ENSG00000163882, ENSG00000163161, ENSG00000103168, ENSG00000143498, ENSG00000272047, ENSG00000125630	3986	30	16792	2.10637	1	0.517756	0.515339
GO:0070059	intrinsic apoptotic signaling pathway in response to endoplasmic reticulum stress	16	0.326664	0.00501295	2.29991	ENSG00000175197, ENSG00000196296, ENSG00000171791, ENSG00000128272, ENSG00000178607, ENSG00000082701, ENSG00000077232, ENSG00000172216, ENSG00000196954, ENSG00000139644, ENSG00000100219, ENSG00000141682, ENSG00000120889, ENSG00000101255, ENSG00000087074, ENSG00000140464	3986	33	16792	2.04254	1	0.517756	0.515339
GO:0006383	transcription from RNA polymerase III promoter	16	0.326664	0.00501295	2.29991	ENSG00000155115, ENSG00000125484, ENSG00000104976, ENSG00000116747, ENSG00000171453, ENSG00000177700, ENSG00000013503, ENSG00000251247, ENSG00000112592, ENSG00000186184, ENSG00000148308, ENSG00000163882, ENSG00000058600, ENSG00000100413, ENSG00000168495, ENSG00000185024	3986	33	16792	2.04254	1	0.517756	0.515339
GO:0044804	nucleophagy	10	0.204165	0.00514559	2.28856	ENSG00000157954, ENSG00000125703, ENSG00000130734, ENSG00000141580, ENSG00000101844, ENSG00000057663, ENSG00000070540, ENSG00000168397, ENSG00000110046, ENSG00000153339	3986	16	16792	2.63297	1	0.517756	0.515339
GO:1902187	negative regulation of viral release from host cell	10	0.204165	0.00514559	2.28856	ENSG00000115561, ENSG00000171206, ENSG00000204713, ENSG00000204977, ENSG00000132109, ENSG00000104228, ENSG00000234127, ENSG00000140464, ENSG00000132256, ENSG00000119401	3986	16	16792	2.63297	1	0.517756	0.515339
GO:0042752	regulation of circadian rhythm	21	0.428746	0.00588101	2.23055	ENSG00000132326, ENSG00000115738, ENSG00000121390, ENSG00000118260, ENSG00000111602, ENSG00000005812, ENSG00000213923, ENSG00000151014, ENSG00000158941, ENSG00000132356, ENSG00000141551, ENSG00000166167, ENSG00000174738, ENSG00000116560, ENSG00000132170, ENSG00000114062, ENSG00000054277, ENSG00000186951, ENSG00000126368, ENSG00000140464, ENSG00000155090	3986	49	16792	1.80546	1	0.582922	0.580201
GO:0016192	vesicle-mediated transport	51	1.04124	0.00629785	2.20081	ENSG00000108669, ENSG00000155256, ENSG00000132612, ENSG00000185829, ENSG00000175106, ENSG00000152700, ENSG00000071051, ENSG00000138834, ENSG00000131165, ENSG00000141376, ENSG00000084733, ENSG00000166676, ENSG00000070718, ENSG00000145817, ENSG00000160695, ENSG00000125447, ENSG00000214078, ENSG00000104142, ENSG00000157823, ENSG00000133318, ENSG00000138802, ENSG00000118640, ENSG00000146574, ENSG0000…	3986	152	16792	1.41349	1	0.610301	0.607452
GO:0030097	hemopoiesis	24	0.489996	0.00639169	2.19438	ENSG00000179348, ENSG00000154188, ENSG00000139618, ENSG00000065883, ENSG00000269897, ENSG00000068724, ENSG00000168283, ENSG00000135535, ENSG00000020633, ENSG00000139842, ENSG00000005194, ENSG00000152518, ENSG00000134250, ENSG00000170949, ENSG00000172728, ENSG00000124813, ENSG00000147155, ENSG00000013375, ENSG00000163659, ENSG00000163565, ENSG00000182512, ENSG00000122025, ENSG00000165304, ENSG0000…	3986	59	16792	1.71366	1	0.610301	0.607452
GO:0043966	histone H3 acetylation	19	0.387913	0.00643292	2.19159	ENSG00000109911, ENSG00000136715, ENSG00000156983, ENSG00000136504, ENSG00000156650, ENSG00000139618, ENSG00000176476, ENSG00000149474, ENSG00000043143, ENSG00000168395, ENSG00000077684, ENSG00000119760, ENSG00000134014, ENSG00000083168, ENSG00000162227, ENSG00000163872, ENSG00000276234, ENSG00000102221, ENSG00000221926	3986	43	16792	1.86145	1	0.610301	0.607452
GO:0006366	transcription from RNA polymerase II promoter	147	3.00122	0.00685196	2.16419	ENSG00000070047, ENSG00000070444, ENSG00000181222, ENSG00000111358, ENSG00000178177, ENSG00000175221, ENSG00000105516, ENSG00000151014, ENSG00000122779, ENSG00000143995, ENSG00000163882, ENSG00000146109, ENSG00000102804, ENSG00000168255, ENSG00000188786, ENSG00000032219, ENSG00000072736, ENSG00000136826, ENSG00000175592, ENSG00000113649, ENSG00000170345, ENSG00000020633, ENSG00000102908, ENSG0000…	3986	513	16792	1.20716	1	0.640899	0.637907
GO:0016236	macroautophagy	29	0.592078	0.00700877	2.15436	ENSG00000163719, ENSG00000157954, ENSG00000177169, ENSG00000070540, ENSG00000175224, ENSG00000196821, ENSG00000155876, ENSG00000132356, ENSG00000116586, ENSG00000156469, ENSG00000168397, ENSG00000167965, ENSG00000130204, ENSG00000023287, ENSG00000198793, ENSG00000196455, ENSG00000106617, ENSG00000116954, ENSG00000150991, ENSG00000197548, ENSG00000170315, ENSG00000083750, ENSG00000088986, ENSG0000…	3986	76	16792	1.60749	1	0.646352	0.643335
GO:0006363	termination of RNA polymerase I transcription	15	0.306247	0.00710491	2.14844	ENSG00000125482, ENSG00000111358, ENSG00000068654, ENSG00000117877, ENSG00000171453, ENSG00000177700, ENSG00000115750, ENSG00000112592, ENSG00000186184, ENSG00000163882, ENSG00000163161, ENSG00000103168, ENSG00000143498, ENSG00000272047, ENSG00000125630	3986	31	16792	2.03842	1	0.646352	0.643335
GO:0033209	tumor necrosis factor-mediated signaling pathway	41	0.837076	0.00783453	2.10599	ENSG00000131467, ENSG00000104365, ENSG00000131323, ENSG00000151694, ENSG00000161955, ENSG00000104689, ENSG00000103490, ENSG00000175166, ENSG00000120949, ENSG00000205220, ENSG00000157873, ENSG00000136930, ENSG00000099341, ENSG00000100804, ENSG00000125726, ENSG00000100764, ENSG00000089486, ENSG00000054967, ENSG00000103035, ENSG00000129235, ENSG00000146072, ENSG00000173692, ENSG00000142507, ENSG0000…	3986	118	16792	1.46375	1	0.703096	0.699814
GO:0008630	intrinsic apoptotic signaling pathway in response to DNA damage	20	0.40833	0.00808524	2.09231	ENSG00000136936, ENSG00000090097, ENSG00000129473, ENSG00000171791, ENSG00000097007, ENSG00000115317, ENSG00000197579, ENSG00000076242, ENSG00000136305, ENSG00000225830, ENSG00000116062, ENSG00000232810, ENSG00000096717, ENSG00000101412, ENSG00000143384, ENSG00000132906, ENSG00000067182, ENSG00000140379, ENSG00000140464, ENSG00000180953	3986	47	16792	1.79266	1	0.715921	0.712579
GO:0006412	translation	78	1.59249	0.00829176	2.08135	ENSG00000172590, ENSG00000130312, ENSG00000075415, ENSG00000111639, ENSG00000106603, ENSG00000111358, ENSG00000114867, ENSG00000137547, ENSG00000266472, ENSG00000171421, ENSG00000142541, ENSG00000143436, ENSG00000125648, ENSG00000158042, ENSG00000169100, ENSG00000125445, ENSG00000062582, ENSG00000125844, ENSG00000167526, ENSG00000122696, ENSG00000165502, ENSG00000239789, ENSG00000122140, ENSG0000…	3986	253	16792	1.29879	1	0.724547	0.721165
GO:0006283	transcription-coupled nucleotide-excision repair	28	0.571662	0.00925202	2.03376	ENSG00000136936, ENSG00000175482, ENSG00000168090, ENSG00000134899, ENSG00000198783, ENSG00000181222, ENSG00000012061, ENSG00000111358, ENSG00000021776, ENSG00000177700, ENSG00000139842, ENSG00000144524, ENSG00000225830, ENSG00000163882, ENSG00000163161, ENSG00000187555, ENSG00000084072, ENSG00000272047, ENSG00000133119, ENSG00000132646, ENSG00000175595, ENSG00000035928, ENSG00000005156, ENSG0000…	3986	74	16792	1.59401	1	0.797957	0.794232
GO:0000422	mitophagy	16	0.326664	0.00964847	2.01554	ENSG00000157954, ENSG00000023287, ENSG00000130734, ENSG00000070540, ENSG00000110046, ENSG00000069509, ENSG00000198925, ENSG00000135093, ENSG00000125703, ENSG00000161011, ENSG00000141580, ENSG00000101844, ENSG00000057663, ENSG00000168397, ENSG00000100225, ENSG00000072518	3986	35	16792	1.92583	1	0.814197	0.810396
GO:0042149	cellular response to glucose starvation	14	0.285831	0.0100811	1.99649	ENSG00000044574, ENSG00000106638, ENSG00000171791, ENSG00000128272, ENSG00000196455, ENSG00000132382, ENSG00000132275, ENSG00000132356, ENSG00000100219, ENSG00000116044, ENSG00000141682, ENSG00000117394, ENSG00000100330, ENSG00000163565	3986	29	16792	2.03374	1	0.814197	0.810396
GO:0000289	nuclear-transcribed mRNA poly(A) tail shortening	14	0.285831	0.0100811	1.99649	ENSG00000114867, ENSG00000179134, ENSG00000111596, ENSG00000135473, ENSG00000076242, ENSG00000113300, ENSG00000152520, ENSG00000080802, ENSG00000132773, ENSG00000088038, ENSG00000149115, ENSG00000161960, ENSG00000182973, ENSG00000128016	3986	29	16792	2.03374	1	0.814197	0.810396
GO:0006384	transcription initiation from RNA polymerase III promoter	6	0.122499	0.0101759	1.99243	ENSG00000125484, ENSG00000100413, ENSG00000185024, ENSG00000174446, ENSG00000113356, ENSG00000121851	3986	7	16792	3.61092	1	0.814197	0.810396
GO:0009108	coenzyme biosynthetic process	6	0.122499	0.0101759	1.99243	ENSG00000068120, ENSG00000152782, ENSG00000125779, ENSG00000122912, ENSG00000127125, ENSG00000138621	3986	7	16792	3.61092	1	0.814197	0.810396
GO:0006501	C-terminal protein lipidation	6	0.122499	0.0101759	1.99243	ENSG00000125703, ENSG00000130734, ENSG00000101844, ENSG00000057663, ENSG00000168397, ENSG00000197548	3986	7	16792	3.61092	1	0.814197	0.810396
GO:0006379	mRNA cleavage	8	0.163332	0.0105795	1.97554	ENSG00000136709, ENSG00000172409, ENSG00000165494, ENSG00000105171, ENSG00000165934, ENSG00000101138, ENSG00000178607, ENSG00000119203	3986	12	16792	2.8085	1	0.816957	0.813144
GO:0051382	kinetochore assembly	8	0.163332	0.0105795	1.97554	ENSG00000167842, ENSG00000102901, ENSG00000251503, ENSG00000145241, ENSG00000138778, ENSG00000117724, ENSG00000175279, ENSG00000143442	3986	12	16792	2.8085	1	0.816957	0.813144
GO:0009650	UV protection	8	0.163332	0.0105795	1.97554	ENSG00000258839, ENSG00000078808, ENSG00000134899, ENSG00000012061, ENSG00000163161, ENSG00000166482, ENSG00000175595, ENSG00000168496	3986	12	16792	2.8085	1	0.816957	0.813144
GO:0098609	cell-cell adhesion	82	1.67415	0.0112211	1.94997	ENSG00000099901, ENSG00000158769, ENSG00000114867, ENSG00000099942, ENSG00000180370, ENSG00000115677, ENSG00000153317, ENSG00000065613, ENSG00000132254, ENSG00000116288, ENSG00000084733, ENSG00000151929, ENSG00000125966, ENSG00000138592, ENSG00000126777, ENSG00000185236, ENSG00000254772, ENSG00000180104, ENSG00000050405, ENSG00000128283, ENSG00000139734, ENSG00000115306, ENSG00000136068, ENSG0000…	3986	271	16792	1.27471	1	0.849349	0.845385
GO:0034976	response to endoplasmic reticulum stress	28	0.571662	0.0112547	1.94866	ENSG00000051108, ENSG00000128272, ENSG00000097007, ENSG00000120948, ENSG00000077232, ENSG00000172216, ENSG00000174437, ENSG00000125827, ENSG00000268173, ENSG00000140943, ENSG00000143870, ENSG00000101255, ENSG00000175197, ENSG00000153066, ENSG00000148572, ENSG00000196296, ENSG00000155660, ENSG00000105647, ENSG00000178607, ENSG00000081307, ENSG00000137312, ENSG00000164463, ENSG00000100219, ENSG0000…	3986	75	16792	1.57276	1	0.849349	0.845385
GO:0090502	RNA phosphodiester bond hydrolysis, endonucleolytic	22	0.449163	0.0116526	1.93358	ENSG00000174371, ENSG00000258790, ENSG00000070366, ENSG00000135900, ENSG00000104356, ENSG00000160917, ENSG00000014164, ENSG00000104889, ENSG00000169385, ENSG00000178607, ENSG00000170892, ENSG00000119203, ENSG00000141101, ENSG00000138231, ENSG00000172922, ENSG00000182173, ENSG00000173818, ENSG00000168496, ENSG00000100697, ENSG00000105171, ENSG00000219200, ENSG00000148688, ENSG00000100890	3986	55	16792	1.6851	1	0.869494	0.865435
GO:0032204	regulation of telomere maintenance	5	0.102082	0.0128356	1.89158	ENSG00000140451, ENSG00000132604, ENSG00000147099, ENSG00000198952, ENSG00000136997	3986	5	16792	4.21274	1	0.916857	0.912577
GO:1990441	negative regulation of transcription from RNA polymerase II promoter in response to endoplasmic reticulum stress	5	0.102082	0.0128356	1.89158	ENSG00000158092, ENSG00000071051, ENSG00000177606, ENSG00000087074, ENSG00000139644	3986	5	16792	4.21274	1	0.916857	0.912577
GO:0043123	positive regulation of I-kappaB kinase/NF-kappaB signaling	52	1.06166	0.0128502	1.89109	ENSG00000239732, ENSG00000158604, ENSG00000213024, ENSG00000097007, ENSG00000175104, ENSG00000244687, ENSG00000171302, ENSG00000003402, ENSG00000119401, ENSG00000132256, ENSG00000119408, ENSG00000142867, ENSG00000127666, ENSG00000196154, ENSG00000064012, ENSG00000150991, ENSG00000137752, ENSG00000197329, ENSG00000110330, ENSG00000189067, ENSG00000137275, ENSG00000088888, ENSG00000100614, ENSG0000…	3986	161	16792	1.36064	1	0.916857	0.912577
GO:0010507	negative regulation of autophagy	16	0.326664	0.0129776	1.8868	ENSG00000157625, ENSG00000178252, ENSG00000198793, ENSG00000066135, ENSG00000171791, ENSG00000114867, ENSG00000112977, ENSG00000110321, ENSG00000134242, ENSG00000075151, ENSG00000155876, ENSG00000103657, ENSG00000146872, ENSG00000143384, ENSG00000055208, ENSG00000187626	3986	36	16792	1.87233	1	0.916857	0.912577
GO:0090307	mitotic spindle assembly	16	0.326664	0.0129776	1.8868	ENSG00000108424, ENSG00000046651, ENSG00000137822, ENSG00000074054, ENSG00000104728, ENSG00000110330, ENSG00000196924, ENSG00000117650, ENSG00000138160, ENSG00000101966, ENSG00000165660, ENSG00000088325, ENSG00000126216, ENSG00000089685, ENSG00000101057, ENSG00000128159	3986	36	16792	1.87233	1	0.916857	0.912577
GO:0042147	retrograde transport, endosome to Golgi	26	0.530829	0.013175	1.88025	ENSG00000028528, ENSG00000135823, ENSG00000111237, ENSG00000151532, ENSG00000102805, ENSG00000204713, ENSG00000154917, ENSG00000089006, ENSG00000169221, ENSG00000100568, ENSG00000108587, ENSG00000107036, ENSG00000177951, ENSG00000151502, ENSG00000069329, ENSG00000115020, ENSG00000223501, ENSG00000184014, ENSG00000117280, ENSG00000101246, ENSG00000108433, ENSG00000185722, ENSG00000149823, ENSG0000…	3986	69	16792	1.58741	1	0.921002	0.916703
GO:0001701	in utero embryonic development	59	1.20457	0.0133612	1.87416	ENSG00000131446, ENSG00000071655, ENSG00000175387, ENSG00000172273, ENSG00000138834, ENSG00000157796, ENSG00000132376, ENSG00000114861, ENSG00000139842, ENSG00000170921, ENSG00000167522, ENSG00000142784, ENSG00000168014, ENSG00000183691, ENSG00000107372, ENSG00000148400, ENSG00000100220, ENSG00000122257, ENSG00000108861, ENSG00000175592, ENSG00000112715, ENSG00000130489, ENSG00000033170, ENSG0000…	3986	187	16792	1.32915	1	0.924288	0.919973
GO:0006361	transcription initiation from RNA polymerase I promoter	15	0.306247	0.0135289	1.86874	ENSG00000125482, ENSG00000111358, ENSG00000068654, ENSG00000117877, ENSG00000171453, ENSG00000177700, ENSG00000115750, ENSG00000112592, ENSG00000186184, ENSG00000163882, ENSG00000163161, ENSG00000103168, ENSG00000143498, ENSG00000272047, ENSG00000125630	3986	33	16792	1.91488	1	0.926244	0.92192
GO:0007020	microtubule nucleation	10	0.204165	0.0137064	1.86308	ENSG00000196072, ENSG00000141551, ENSG00000072864, ENSG00000109171, ENSG00000151849, ENSG00000127914, ENSG00000126216, ENSG00000137822, ENSG00000074054, ENSG00000128159	3986	18	16792	2.34041	1	0.928819	0.924483
GO:0051403	stress-activated MAPK cascade	11	0.224581	0.0142864	1.84508	ENSG00000104365, ENSG00000166167, ENSG00000170315, ENSG00000168884, ENSG00000136280, ENSG00000055130, ENSG00000107968, ENSG00000109320, ENSG00000173933, ENSG00000150991, ENSG00000072803	3986	21	16792	2.20668	1	0.957572	0.953102
GO:0007088	regulation of mitotic nuclear division	12	0.244998	0.0144499	1.84013	ENSG00000117650, ENSG00000138182, ENSG00000180198, ENSG00000112029, ENSG00000112659, ENSG00000065883, ENSG00000156509, ENSG00000159069, ENSG00000044090, ENSG00000100462, ENSG00000127564, ENSG00000241360	3986	24	16792	2.10637	1	0.957572	0.953102
GO:0016049	cell growth	22	0.449163	0.0145633	1.83674	ENSG00000103274, ENSG00000090020, ENSG00000198890, ENSG00000106009, ENSG00000105887, ENSG00000198793, ENSG00000171150, ENSG00000141837, ENSG00000171791, ENSG00000130669, ENSG00000113732, ENSG00000112851, ENSG00000116954, ENSG00000198964, ENSG00000058262, ENSG00000116586, ENSG00000100219, ENSG00000165675, ENSG00000134250, ENSG00000168003, ENSG00000120332, ENSG00000141564	3986	56	16792	1.65501	1	0.957572	0.953102
GO:0032259	methylation	27	0.551245	0.0147377	1.83157	ENSG00000214756, ENSG00000132275, ENSG00000116984, ENSG00000152784, ENSG00000198917, ENSG00000158483, ENSG00000123427, ENSG00000160172, ENSG00000186523, ENSG00000141956, ENSG00000185432, ENSG00000127720, ENSG00000155542, ENSG00000067365, ENSG00000099810, ENSG00000110871, ENSG00000206562, ENSG00000156239, ENSG00000117543, ENSG00000169612, ENSG00000005194, ENSG00000170439, ENSG00000165275, ENSG0000…	3986	73	16792	1.55814	1	0.959539	0.95506
GO:0006390	transcription from mitochondrial promoter	7	0.142915	0.0152043	1.81803	ENSG00000172171, ENSG00000122085, ENSG00000107815, ENSG00000155846, ENSG00000171612, ENSG00000162851, ENSG00000156469	3986	10	16792	2.94892	1	0.980308	0.975732
GO:0030036	actin cytoskeleton organization	43	0.877909	0.0159248	1.79793	ENSG00000105993, ENSG00000134516, ENSG00000131504, ENSG00000106789, ENSG00000097007, ENSG00000205542, ENSG00000196588, ENSG00000203485, ENSG00000177105, ENSG00000132376, ENSG00000132254, ENSG00000136238, ENSG00000066427, ENSG00000010322, ENSG00000141298, ENSG00000158186, ENSG00000149798, ENSG00000106683, ENSG00000104880, ENSG00000105443, ENSG00000131236, ENSG00000131697, ENSG00000128487, ENSG0000…	3986	130	16792	1.39345	1	1	0.995482
GO:0043124	negative regulation of I-kappaB kinase/NF-kappaB signaling	17	0.34708	0.0161719	1.79124	ENSG00000160703, ENSG00000103194, ENSG00000196781, ENSG00000103490, ENSG00000064012, ENSG00000097007, ENSG00000116539, ENSG00000167984, ENSG00000138032, ENSG00000137275, ENSG00000145901, ENSG00000118503, ENSG00000100614, ENSG00000136560, ENSG00000096717, ENSG00000142405, ENSG00000105483	3986	40	16792	1.79042	1	1	0.995482
GO:0007346	regulation of mitotic cell cycle	17	0.34708	0.0161719	1.79124	ENSG00000102096, ENSG00000131931, ENSG00000112029, ENSG00000198355, ENSG00000064102, ENSG00000155827, ENSG00000136997, ENSG00000137575, ENSG00000083799, ENSG00000142230, ENSG00000103549, ENSG00000119408, ENSG00000096717, ENSG00000090612, ENSG00000089685, ENSG00000090316, ENSG00000107862	3986	40	16792	1.79042	1	1	0.995482
GO:0043085	positive regulation of catalytic activity	29	0.592078	0.0178796	1.74764	ENSG00000153234, ENSG00000105851, ENSG00000125484, ENSG00000130755, ENSG00000006634, ENSG00000138613, ENSG00000107959, ENSG00000137700, ENSG00000003402, ENSG00000141376, ENSG00000174705, ENSG00000165240, ENSG00000125966, ENSG00000035681, ENSG00000272886, ENSG00000188827, ENSG00000151065, ENSG00000149541, ENSG00000126261, ENSG00000171791, ENSG00000147162, ENSG00000035928, ENSG00000080815, ENSG0000…	3986	81	16792	1.50827	1	1	0.995482
GO:0032897	negative regulation of viral transcription	8	0.163332	0.0182751	1.73814	ENSG00000171206, ENSG00000106785, ENSG00000067066, ENSG00000204713, ENSG00000204977, ENSG00000132109, ENSG00000128016, ENSG00000119401	3986	13	16792	2.59246	1	1	0.995482
GO:0043981	histone H4-K5 acetylation	9	0.183748	0.0199383	1.70031	ENSG00000136504, ENSG00000025293, ENSG00000120071, ENSG00000147162, ENSG00000043143, ENSG00000077684, ENSG00000114982, ENSG00000139620, ENSG00000102221	3986	16	16792	2.36967	1	1	0.995482
GO:0043982	histone H4-K8 acetylation	9	0.183748	0.0199383	1.70031	ENSG00000136504, ENSG00000025293, ENSG00000120071, ENSG00000147162, ENSG00000043143, ENSG00000077684, ENSG00000114982, ENSG00000139620, ENSG00000102221	3986	16	16792	2.36967	1	1	0.995482
GO:2001234	negative regulation of apoptotic signaling pathway	9	0.183748	0.0199383	1.70031	ENSG00000153234, ENSG00000070444, ENSG00000183691, ENSG00000168036, ENSG00000171791, ENSG00000196588, ENSG00000089289, ENSG00000080815, ENSG00000139644	3986	16	16792	2.36967	1	1	0.995482
GO:0043488	regulation of mRNA stability	35	0.714577	0.0203206	1.69206	ENSG00000131467, ENSG00000090097, ENSG00000161955, ENSG00000175166, ENSG00000114867, ENSG00000172795, ENSG00000205220, ENSG00000136930, ENSG00000099341, ENSG00000120699, ENSG00000083520, ENSG00000100804, ENSG00000152518, ENSG00000107371, ENSG00000100764, ENSG00000272886, ENSG00000103035, ENSG00000109971, ENSG00000128016, ENSG00000173692, ENSG00000179134, ENSG00000142507, ENSG00000135870, ENSG0000…	3986	103	16792	1.43152	1	1	0.995482
GO:0070423	nucleotide-binding oligomerization domain containing signaling pathway	12	0.244998	0.0203741	1.69092	ENSG00000104365, ENSG00000170315, ENSG00000157625, ENSG00000104312, ENSG00000118503, ENSG00000083799, ENSG00000064012, ENSG00000175104, ENSG00000244687, ENSG00000106100, ENSG00000150991, ENSG00000055208	3986	25	16792	2.02212	1	1	0.995482
GO:0006306	DNA methylation	12	0.244998	0.0203741	1.69092	ENSG00000005483, ENSG00000076108, ENSG00000143614, ENSG00000114735, ENSG00000171681, ENSG00000162639, ENSG00000119969, ENSG00000102974, ENSG00000167491, ENSG00000170345, ENSG00000118058, ENSG00000181090	3986	25	16792	2.02212	1	1	0.995482
GO:0051090	regulation of sequence-specific DNA binding transcription factor activity	12	0.244998	0.0203741	1.69092	ENSG00000165025, ENSG00000106290, ENSG00000104205, ENSG00000187741, ENSG00000185386, ENSG00000174928, ENSG00000163482, ENSG00000101336, ENSG00000162227, ENSG00000187555, ENSG00000177606, ENSG00000170345	3986	25	16792	2.02212	1	1	0.995482
GO:0050718	positive regulation of interleukin-1 beta secretion	11	0.224581	0.0207203	1.6836	ENSG00000110218, ENSG00000089041, ENSG00000142166, ENSG00000103490, ENSG00000162711, ENSG00000104518, ENSG00000142405, ENSG00000189403, ENSG00000105483, ENSG00000137752, ENSG00000221926	3986	22	16792	2.10637	1	1	0.995482
GO:0051443	positive regulation of ubiquitin-protein transferase activity	11	0.224581	0.0207203	1.6836	ENSG00000185651, ENSG00000269897, ENSG00000113369, ENSG00000150401, ENSG00000109670, ENSG00000197579, ENSG00000103126, ENSG00000168283, ENSG00000101255, ENSG00000043093, ENSG00000103266	3986	22	16792	2.10637	1	1	0.995482
GO:0030521	androgen receptor signaling pathway	17	0.34708	0.0208095	1.68174	ENSG00000124151, ENSG00000180530, ENSG00000175221, ENSG00000115548, ENSG00000117713, ENSG00000132341, ENSG00000266412, ENSG00000078043, ENSG00000084676, ENSG00000114062, ENSG00000168036, ENSG00000105173, ENSG00000108510, ENSG00000054118, ENSG00000204209, ENSG00000033800, ENSG00000143257	3986	41	16792	1.74675	1	1	0.995482
GO:0006289	nucleotide-excision repair	17	0.34708	0.0208095	1.68174	ENSG00000136936, ENSG00000139618, ENSG00000012061, ENSG00000111358, ENSG00000175595, ENSG00000154328, ENSG00000114026, ENSG00000154767, ENSG00000066427, ENSG00000166169, ENSG00000270181, ENSG00000119318, ENSG00000163161, ENSG00000147400, ENSG00000188827, ENSG00000109674, ENSG00000272047	3986	41	16792	1.74675	1	1	0.995482
GO:0032481	positive regulation of type I interferon production	20	0.40833	0.0210314	1.67713	ENSG00000113356, ENSG00000020922, ENSG00000134242, ENSG00000171453, ENSG00000105939, ENSG00000177700, ENSG00000013503, ENSG00000172936, ENSG00000164430, ENSG00000165025, ENSG00000186184, ENSG00000163882, ENSG00000058600, ENSG00000168036, ENSG00000100413, ENSG00000168495, ENSG00000184584, ENSG00000109320, ENSG00000121851, ENSG00000163565	3986	51	16792	1.65206	1	1	0.995482
GO:0006623	protein targeting to vacuole	6	0.122499	0.0218511	1.66053	ENSG00000129003, ENSG00000197969, ENSG00000100568, ENSG00000196455, ENSG00000108433, ENSG00000151532	3986	8	16792	3.15956	1	1	0.995482
GO:0071550	death-inducing signaling complex assembly	6	0.122499	0.0218511	1.66053	ENSG00000137275, ENSG00000064012, ENSG00000232810, ENSG00000067182, ENSG00000132155, ENSG00000102871	3986	8	16792	3.15956	1	1	0.995482
GO:0000288	nuclear-transcribed mRNA catabolic process, deadenylation-dependent decay	6	0.122499	0.0218511	1.66053	ENSG00000152518, ENSG00000088038, ENSG00000111596, ENSG00000135870, ENSG00000144231, ENSG00000128016	3986	8	16792	3.15956	1	1	0.995482
GO:0050773	regulation of dendrite development	6	0.122499	0.0218511	1.66053	ENSG00000119866, ENSG00000124839, ENSG00000130347, ENSG00000113758, ENSG00000124126, ENSG00000183049	3986	8	16792	3.15956	1	1	0.995482
GO:0006661	phosphatidylinositol biosynthetic process	22	0.449163	0.0220808	1.65599	ENSG00000163719, ENSG00000105851, ENSG00000003987, ENSG00000155252, ENSG00000105647, ENSG00000148384, ENSG00000196455, ENSG00000138685, ENSG00000132376, ENSG00000171862, ENSG00000035115, ENSG00000159082, ENSG00000115020, ENSG00000011405, ENSG00000051382, ENSG00000150867, ENSG00000121879, ENSG00000171608, ENSG00000268173, ENSG00000143393, ENSG00000100330, ENSG00000108389, ENSG00000143398	3986	58	16792	1.59794	1	1	0.995482
GO:0008625	extrinsic apoptotic signaling pathway via death domain receptors	16	0.326664	0.0222375	1.65291	ENSG00000196072, ENSG00000213782, ENSG00000104689, ENSG00000171791, ENSG00000173530, ENSG00000158796, ENSG00000196712, ENSG00000081791, ENSG00000151929, ENSG00000160570, ENSG00000232810, ENSG00000120889, ENSG00000015475, ENSG00000067182, ENSG00000102871, ENSG00000204209	3986	38	16792	1.77379	1	1	0.995482
GO:0000731	DNA synthesis involved in DNA repair	15	0.306247	0.0236971	1.62531	ENSG00000174371, ENSG00000175482, ENSG00000133119, ENSG00000177302, ENSG00000139618, ENSG00000197299, ENSG00000175643, ENSG00000020922, ENSG00000170734, ENSG00000138376, ENSG00000096717, ENSG00000083093, ENSG00000126215, ENSG00000177084, ENSG00000108384	3986	35	16792	1.80546	1	1	0.995482
GO:0070911	global genome nucleotide-excision repair	14	0.285831	0.0251606	1.59928	ENSG00000136936, ENSG00000012061, ENSG00000111358, ENSG00000175595, ENSG00000150991, ENSG00000154767, ENSG00000139842, ENSG00000170315, ENSG00000119318, ENSG00000116030, ENSG00000163161, ENSG00000157450, ENSG00000147400, ENSG00000272047	3986	32	16792	1.84308	1	1	0.995482
GO:0006986	response to unfolded protein	17	0.34708	0.0263898	1.57856	ENSG00000051108, ENSG00000175197, ENSG00000204390, ENSG00000145050, ENSG00000162616, ENSG00000144381, ENSG00000136816, ENSG00000164070, ENSG00000132002, ENSG00000139644, ENSG00000080824, ENSG00000164463, ENSG00000113194, ENSG00000149257, ENSG00000168936, ENSG00000109971, ENSG00000120694	3986	42	16792	1.70516	1	1	0.995482
GO:0009411	response to UV	17	0.34708	0.0263898	1.57856	ENSG00000134899, ENSG00000175595, ENSG00000162607, ENSG00000116747, ENSG00000075131, ENSG00000158941, ENSG00000132356, ENSG00000119401, ENSG00000141682, ENSG00000225830, ENSG00000163161, ENSG00000116062, ENSG00000121988, ENSG00000166803, ENSG00000259316, ENSG00000164306, ENSG00000130939, ENSG00000140464	3986	42	16792	1.70516	1	1	0.995482
GO:0060348	bone development	17	0.34708	0.0263898	1.57856	ENSG00000157637, ENSG00000113658, ENSG00000114439, ENSG00000170365, ENSG00000171522, ENSG00000171456, ENSG00000167522, ENSG00000174705, ENSG00000117385, ENSG00000167397, ENSG00000184675, ENSG00000141127, ENSG00000147316, ENSG00000108786, ENSG00000109685, ENSG00000183018, ENSG00000120693	3986	42	16792	1.70516	1	1	0.995482
GO:0043928	exonucleolytic nuclear-transcribed mRNA catabolic process involved in deadenylation-dependent decay	13	0.265414	0.0265856	1.57535	ENSG00000151065, ENSG00000130520, ENSG00000172795, ENSG00000175324, ENSG00000170860, ENSG00000110367, ENSG00000113300, ENSG00000130332, ENSG00000120699, ENSG00000083520, ENSG00000107371, ENSG00000272886, ENSG00000075914	3986	29	16792	1.88847	1	1	0.995482
GO:0010941	regulation of cell death	7	0.142915	0.0268062	1.57176	ENSG00000130522, ENSG00000204389, ENSG00000204388, ENSG00000104529, ENSG00000177606, ENSG00000171223, ENSG00000084092	3986	11	16792	2.68084	1	1	0.995482
GO:0048715	negative regulation of oligodendrocyte differentiation	7	0.142915	0.0268062	1.57176	ENSG00000115738, ENSG00000168036, ENSG00000143507, ENSG00000114315, ENSG00000148400, ENSG00000144355, ENSG00000196712	3986	11	16792	2.68084	1	1	0.995482
GO:0046855	inositol phosphate dephosphorylation	7	0.142915	0.0268062	1.57176	ENSG00000159082, ENSG00000003987, ENSG00000148384, ENSG00000151689, ENSG00000132376, ENSG00000171862, ENSG00000141401	3986	11	16792	2.68084	1	1	0.995482
GO:0071407	cellular response to organic cyclic compound	22	0.449163	0.0268122	1.57167	ENSG00000245848, ENSG00000064012, ENSG00000130669, ENSG00000113658, ENSG00000180370, ENSG00000134057, ENSG00000172216, ENSG00000150782, ENSG00000171700, ENSG00000100906, ENSG00000166167, ENSG00000144747, ENSG00000138061, ENSG00000184584, ENSG00000232810, ENSG00000101146, ENSG00000102554, ENSG00000103126, ENSG00000163659, ENSG00000127314, ENSG00000120693, ENSG00000038945	3986	59	16792	1.57085	1	1	0.995482
GO:0006464	cellular protein modification process	35	0.714577	0.0270083	1.5685	ENSG00000155313, ENSG00000103174, ENSG00000099804, ENSG00000151292, ENSG00000144182, ENSG00000097007, ENSG00000113532, ENSG00000175764, ENSG00000119685, ENSG00000008513, ENSG00000119402, ENSG00000185651, ENSG00000083444, ENSG00000109332, ENSG00000250151, ENSG00000027847, ENSG00000114999, ENSG00000159267, ENSG00000167196, ENSG00000081721, ENSG00000116237, ENSG00000197548, ENSG00000112079, ENSG0000…	3986	105	16792	1.40425	1	1	0.995482
GO:0006302	double-strand break repair	24	0.489996	0.0272189	1.56513	ENSG00000111802, ENSG00000095002, ENSG00000041880, ENSG00000139618, ENSG00000012061, ENSG00000042088, ENSG00000171320, ENSG00000197774, ENSG00000112941, ENSG00000020922, ENSG00000005156, ENSG00000002016, ENSG00000154920, ENSG00000087206, ENSG00000081177, ENSG00000112130, ENSG00000128908, ENSG00000107290, ENSG00000188486, ENSG00000168496, ENSG00000071539, ENSG00000163840, ENSG00000180336, ENSG0000…	3986	66	16792	1.53191	1	1	0.995482
GO:0071897	DNA biosynthetic process	12	0.244998	0.0279075	1.55428	ENSG00000166169, ENSG00000256525, ENSG00000167085, ENSG00000132382, ENSG00000112941, ENSG00000117724, ENSG00000005156, ENSG00000140521, ENSG00000167900, ENSG00000104472, ENSG00000166548, ENSG00000014138	3986	26	16792	1.94434	1	1	0.995482
GO:0010212	response to ionizing radiation	19	0.387913	0.0281273	1.55087	ENSG00000181026, ENSG00000106009, ENSG00000148153, ENSG00000173559, ENSG00000152457, ENSG00000139579, ENSG00000163781, ENSG00000087206, ENSG00000112130, ENSG00000168411, ENSG00000162441, ENSG00000188486, ENSG00000186104, ENSG00000147465, ENSG00000126215, ENSG00000140534, ENSG00000108384, ENSG00000090339, ENSG00000185515	3986	49	16792	1.63351	1	1	0.995482
GO:0070536	protein K63-linked deubiquitination	11	0.224581	0.0290275	1.53719	ENSG00000155313, ENSG00000136878, ENSG00000118503, ENSG00000083799, ENSG00000165660, ENSG00000138592, ENSG00000019995, ENSG00000273820, ENSG00000068308, ENSG00000066427, ENSG00000185515	3986	23	16792	2.01479	1	1	0.995482
GO:0090398	cellular senescence	11	0.224581	0.0290275	1.53719	ENSG00000083168, ENSG00000140474, ENSG00000198890, ENSG00000115738, ENSG00000132604, ENSG00000188486, ENSG00000163029, ENSG00000163932, ENSG00000135111, ENSG00000140464, ENSG00000198836	3986	23	16792	2.01479	1	1	0.995482
GO:0006607	NLS-bearing protein import into nucleus	11	0.224581	0.0290275	1.53719	ENSG00000025800, ENSG00000065150, ENSG00000105576, ENSG00000114030, ENSG00000213672, ENSG00000108424, ENSG00000138750, ENSG00000196497, ENSG00000102753, ENSG00000082074, ENSG00000173402	3986	23	16792	2.01479	1	1	0.995482
GO:0006744	ubiquinone biosynthetic process	8	0.163332	0.0291786	1.53494	ENSG00000120942, ENSG00000167113, ENSG00000163050, ENSG00000167186, ENSG00000110871, ENSG00000135469, ENSG00000088682, ENSG00000115520	3986	14	16792	2.40728	1	1	0.995482
GO:0042795	snRNA transcription from RNA polymerase II promoter	25	0.510412	0.0297213	1.52693	ENSG00000181222, ENSG00000137947, ENSG00000064102, ENSG00000177700, ENSG00000163882, ENSG00000143493, ENSG00000163125, ENSG00000197265, ENSG00000104976, ENSG00000137413, ENSG00000174446, ENSG00000153767, ENSG00000064995, ENSG00000173559, ENSG00000138785, ENSG00000139579, ENSG00000148835, ENSG00000112592, ENSG00000106290, ENSG00000168002, ENSG00000005075, ENSG00000122484, ENSG00000164902, ENSG0000…	3986	70	16792	1.50455	1	1	0.995482
GO:2000377	regulation of reactive oxygen species metabolic process	10	0.204165	0.0297941	1.52587	ENSG00000181852, ENSG00000137275, ENSG00000114383, ENSG00000138061, ENSG00000167186, ENSG00000111206, ENSG00000232810, ENSG00000175193, ENSG00000164543, ENSG00000110330	3986	20	16792	2.10637	1	1	0.995482
GO:0016569	covalent chromatin modification	37	0.75541	0.0298589	1.52493	ENSG00000177200, ENSG00000163939, ENSG00000100084, ENSG00000163935, ENSG00000131845, ENSG00000111875, ENSG00000119042, ENSG00000132275, ENSG00000117713, ENSG00000172530, ENSG00000198945, ENSG00000171316, ENSG00000100888, ENSG00000204256, ENSG00000083544, ENSG00000169925, ENSG00000184402, ENSG00000269897, ENSG00000139613, ENSG00000099991, ENSG00000168283, ENSG00000153922, ENSG00000173894, ENSG0000…	3986	113	16792	1.37939	1	1	0.995482
GO:0015012	heparan sulfate proteoglycan biosynthetic process	9	0.183748	0.0299702	1.52331	ENSG00000176022, ENSG00000162694, ENSG00000272916, ENSG00000149541, ENSG00000182197, ENSG00000151348, ENSG00000138604, ENSG00000103489, ENSG00000166507, ENSG00000111817	3986	17	16792	2.23028	1	1	0.995482
GO:1902041	regulation of extrinsic apoptotic signaling pathway via death domain receptors	9	0.183748	0.0299702	1.52331	ENSG00000137275, ENSG00000067066, ENSG00000167895, ENSG00000104689, ENSG00000064012, ENSG00000110514, ENSG00000120889, ENSG00000003402, ENSG00000102871	3986	17	16792	2.23028	1	1	0.995482
GO:2000811	negative regulation of anoikis	9	0.183748	0.0299702	1.52331	ENSG00000161638, ENSG00000131845, ENSG00000196781, ENSG00000169398, ENSG00000171791, ENSG00000121879, ENSG00000148400, ENSG00000143384, ENSG00000141378	3986	17	16792	2.23028	1	1	0.995482
GO:2000114	regulation of establishment of cell polarity	9	0.183748	0.0299702	1.52331	ENSG00000143951, ENSG00000187164, ENSG00000141376, ENSG00000181852, ENSG00000107104, ENSG00000138182, ENSG00000164327, ENSG00000204628, ENSG00000127314	3986	17	16792	2.23028	1	1	0.995482
GO:0042254	ribosome biogenesis	15	0.306247	0.0305185	1.51544	ENSG00000101181, ENSG00000171421, ENSG00000204590, ENSG00000170468, ENSG00000135763, ENSG00000170854, ENSG00000120158, ENSG00000159111, ENSG00000143748, ENSG00000100138, ENSG00000231500, ENSG00000100029, ENSG00000274349, ENSG00000084092, ENSG00000125485	3986	36	16792	1.75531	1	1	0.995482
GO:1900740	positive regulation of protein insertion into mitochondrial membrane involved in apoptotic signaling pathway	13	0.265414	0.0349808	1.45617	ENSG00000128245, ENSG00000198176, ENSG00000108953, ENSG00000064012, ENSG00000171791, ENSG00000136448, ENSG00000170027, ENSG00000141682, ENSG00000088986, ENSG00000120910, ENSG00000104081, ENSG00000101412, ENSG00000015475	3986	30	16792	1.82552	1	1	0.995482
GO:0007052	mitotic spindle organization	13	0.265414	0.0349808	1.45617	ENSG00000180198, ENSG00000173273, ENSG00000047849, ENSG00000064102, ENSG00000134057, ENSG00000132341, ENSG00000074054, ENSG00000138160, ENSG00000160299, ENSG00000087586, ENSG00000100242, ENSG00000123473, ENSG00000145632	3986	30	16792	1.82552	1	1	0.995482
GO:0000077	DNA damage checkpoint	13	0.265414	0.0349808	1.45617	ENSG00000175054, ENSG00000104885, ENSG00000172273, ENSG00000067369, ENSG00000152942, ENSG00000113456, ENSG00000188486, ENSG00000164053, ENSG00000143493, ENSG00000101412, ENSG00000092853, ENSG00000149554, ENSG00000091436	3986	30	16792	1.82552	1	1	0.995482
GO:0032922	circadian regulation of gene expression	21	0.428746	0.0351638	1.4539	ENSG00000159208, ENSG00000153187, ENSG00000132326, ENSG00000134107, ENSG00000180530, ENSG00000115738, ENSG00000049246, ENSG00000147162, ENSG00000128272, ENSG00000132382, ENSG00000213923, ENSG00000151014, ENSG00000118058, ENSG00000173914, ENSG00000141551, ENSG00000096717, ENSG00000186951, ENSG00000100462, ENSG00000073614, ENSG00000126368, ENSG00000140464	3986	57	16792	1.55206	1	1	0.995482
GO:0016310	phosphorylation	33	0.673744	0.0366223	1.43625	ENSG00000068120, ENSG00000105851, ENSG00000113716, ENSG00000175283, ENSG00000152782, ENSG00000162408, ENSG00000180370, ENSG00000196367, ENSG00000198964, ENSG00000152620, ENSG00000120137, ENSG00000008130, ENSG00000179918, ENSG00000172409, ENSG00000182541, ENSG00000167900, ENSG00000198793, ENSG00000078177, ENSG00000198814, ENSG00000141560, ENSG00000163050, ENSG00000051382, ENSG00000103507, ENSG0000…	3986	100	16792	1.39021	1	1	0.995482
GO:0006400	tRNA modification	12	0.244998	0.0372476	1.4289	ENSG00000160193, ENSG00000089195, ENSG00000037897, ENSG00000113272, ENSG00000174177, ENSG00000166166, ENSG00000090861, ENSG00000168806, ENSG00000142544, ENSG00000043514, ENSG00000167118, ENSG00000151576	3986	27	16792	1.87233	1	1	0.995482
GO:0008643	carbohydrate transport	12	0.244998	0.0372476	1.4289	ENSG00000134955, ENSG00000176087, ENSG00000181830, ENSG00000109667, ENSG00000136856, ENSG00000142583, ENSG00000134490, ENSG00000138459, ENSG00000133460, ENSG00000163933, ENSG00000105221, ENSG00000117620	3986	27	16792	1.87233	1	1	0.995482
GO:0032008	positive regulation of TOR signaling	12	0.244998	0.0372476	1.4289	ENSG00000113384, ENSG00000083750, ENSG00000100219, ENSG00000157020, ENSG00000127580, ENSG00000164327, ENSG00000116954, ENSG00000164654, ENSG00000155876, ENSG00000141564, ENSG00000116586, ENSG00000167965	3986	27	16792	1.87233	1	1	0.995482
GO:0032728	positive regulation of interferon-beta production	12	0.244998	0.0372476	1.4289	ENSG00000013503, ENSG00000239732, ENSG00000142166, ENSG00000104312, ENSG00000088888, ENSG00000168495, ENSG00000128604, ENSG00000181481, ENSG00000113356, ENSG00000189403, ENSG00000105939, ENSG00000137312	3986	27	16792	1.87233	1	1	0.995482
GO:0042110	T cell activation	18	0.367497	0.0374856	1.42614	ENSG00000105851, ENSG00000175344, ENSG00000015285, ENSG00000144381, ENSG00000064012, ENSG00000196684, ENSG00000071051, ENSG00000069869, ENSG00000114013, ENSG00000167984, ENSG00000158092, ENSG00000142166, ENSG00000166664, ENSG00000112195, ENSG00000171608, ENSG00000160223, ENSG00000117280, ENSG00000163512	3986	47	16792	1.61339	1	1	0.995482
GO:0006296	nucleotide-excision repair, DNA incision, 5'-to lesion	15	0.306247	0.0386652	1.41268	ENSG00000136936, ENSG00000175482, ENSG00000133119, ENSG00000132646, ENSG00000134899, ENSG00000012061, ENSG00000111358, ENSG00000065057, ENSG00000175595, ENSG00000035928, ENSG00000150991, ENSG00000139842, ENSG00000170315, ENSG00000163161, ENSG00000272047	3986	37	16792	1.70787	1	1	0.995482
GO:0071108	protein K48-linked deubiquitination	11	0.224581	0.0394401	1.40406	ENSG00000155313, ENSG00000135913, ENSG00000136878, ENSG00000118503, ENSG00000175073, ENSG00000138592, ENSG00000273820, ENSG00000068308, ENSG00000066427, ENSG00000115464, ENSG00000163930	3986	24	16792	1.93084	1	1	0.995482
GO:0032886	regulation of microtubule-based process	6	0.122499	0.0396645	1.4016	ENSG00000087448, ENSG00000131504, ENSG00000082701, ENSG00000127603, ENSG00000212916, ENSG00000134982	3986	9	16792	2.8085	1	1	0.995482
GO:0042921	glucocorticoid receptor signaling pathway	6	0.122499	0.0396645	1.4016	ENSG00000128245, ENSG00000113580, ENSG00000069869, ENSG00000117713, ENSG00000198646, ENSG00000248643	3986	9	16792	2.8085	1	1	0.995482
GO:0002098	tRNA wobble uridine modification	6	0.122499	0.0396645	1.4016	ENSG00000124217, ENSG00000174177, ENSG00000142544, ENSG00000134014, ENSG00000130299, ENSG00000167118	3986	9	16792	2.8085	1	1	0.995482
GO:0006264	mitochondrial DNA replication	6	0.122499	0.0396645	1.4016	ENSG00000172171, ENSG00000107815, ENSG00000164306, ENSG00000140521, ENSG00000125871, ENSG00000171612	3986	9	16792	2.8085	1	1	0.995482
GO:2000304	positive regulation of ceramide biosynthetic process	6	0.122499	0.0396645	1.4016	ENSG00000035681, ENSG00000232810, ENSG00000163932, ENSG00000067182, ENSG00000204628, ENSG00000103056	3986	9	16792	2.8085	1	1	0.995482
GO:0048489	synaptic vesicle transport	6	0.122499	0.0396645	1.4016	ENSG00000159082, ENSG00000168036, ENSG00000136827, ENSG00000143553, ENSG00000079805, ENSG00000104133	3986	9	16792	2.8085	1	1	0.995482
GO:0018095	protein polyglutamylation	6	0.122499	0.0396645	1.4016	ENSG00000070761, ENSG00000106477, ENSG00000135912, ENSG00000141933, ENSG00000175764, ENSG00000119685	3986	9	16792	2.8085	1	1	0.995482
GO:0006921	cellular component disassembly involved in execution phase of apoptosis	10	0.204165	0.0414248	1.38274	ENSG00000100813, ENSG00000168522, ENSG00000169398, ENSG00000064012, ENSG00000163932, ENSG00000092853, ENSG00000134982, ENSG00000182568, ENSG00000110330, ENSG00000102572	3986	21	16792	2.00607	1	1	0.995482
GO:0016573	histone acetylation	14	0.285831	0.0417862	1.37897	ENSG00000153046, ENSG00000124151, ENSG00000125484, ENSG00000071655, ENSG00000173011, ENSG00000156650, ENSG00000168395, ENSG00000196367, ENSG00000282034, ENSG00000080603, ENSG00000083168, ENSG00000148835, ENSG00000169057, ENSG00000276234, ENSG00000101189	3986	34	16792	1.73466	1	1	0.995482
GO:0051321	meiotic cell cycle	14	0.285831	0.0417862	1.37897	ENSG00000174371, ENSG00000134627, ENSG00000177463, ENSG00000156509, ENSG00000020922, ENSG00000171467, ENSG00000137497, ENSG00000113575, ENSG00000117650, ENSG00000112053, ENSG00000253797, ENSG00000188486, ENSG00000164823, ENSG00000101972	3986	34	16792	1.73466	1	1	0.995482
GO:0075733	intracellular transport of virus	19	0.387913	0.0417929	1.3789	ENSG00000110713, ENSG00000093000, ENSG00000108424, ENSG00000213024, ENSG00000132341, ENSG00000196313, ENSG00000136243, ENSG00000150991, ENSG00000155975, ENSG00000139722, ENSG00000170315, ENSG00000114030, ENSG00000138750, ENSG00000124789, ENSG00000030066, ENSG00000101146, ENSG00000102753, ENSG00000126883, ENSG00000058804	3986	51	16792	1.56945	1	1	0.995482
GO:0071539	protein localization to centrosome	9	0.183748	0.0429812	1.36672	ENSG00000141551, ENSG00000078674, ENSG00000168014, ENSG00000173588, ENSG00000087586, ENSG00000175455, ENSG00000147316, ENSG00000123473, ENSG00000076382	3986	18	16792	2.10637	1	1	0.995482
GO:0031668	cellular response to extracellular stimulus	9	0.183748	0.0429812	1.36672	ENSG00000153234, ENSG00000089041, ENSG00000170425, ENSG00000175592, ENSG00000101126, ENSG00000104518, ENSG00000254087, ENSG00000170345, ENSG00000160007	3986	18	16792	2.10637	1	1	0.995482
GO:0031293	membrane protein intracellular domain proteolysis	9	0.183748	0.0429812	1.36672	ENSG00000101294, ENSG00000151694, ENSG00000117362, ENSG00000012174, ENSG00000109320, ENSG00000140943, ENSG00000138613, ENSG00000175104, ENSG00000005206	3986	18	16792	2.10637	1	1	0.995482
GO:0000002	mitochondrial genome maintenance	7	0.142915	0.0430329	1.3662	ENSG00000140451, ENSG00000158042, ENSG00000196365, ENSG00000068305, ENSG00000125871, ENSG00000171612, ENSG00000198836	3986	12	16792	2.45743	1	1	0.995482
GO:0097502	mannosylation	7	0.142915	0.0430329	1.3662	ENSG00000119523, ENSG00000253710, ENSG00000060642, ENSG00000182858, ENSG00000033011, ENSG00000069943, ENSG00000214160	3986	12	16792	2.45743	1	1	0.995482
GO:0010939	regulation of necrotic cell death	7	0.142915	0.0430329	1.3662	ENSG00000170315, ENSG00000137275, ENSG00000064012, ENSG00000150991, ENSG00000102871, ENSG00000110330, ENSG00000108179	3986	12	16792	2.45743	1	1	0.995482
GO:0002223	stimulatory C-type lectin receptor signaling pathway	34	0.694161	0.0435991	1.36052	ENSG00000131467, ENSG00000104365, ENSG00000108622, ENSG00000175166, ENSG00000205220, ENSG00000180370, ENSG00000076662, ENSG00000175104, ENSG00000244687, ENSG00000132155, ENSG00000136930, ENSG00000099341, ENSG00000100804, ENSG00000165025, ENSG00000055130, ENSG00000100764, ENSG00000142867, ENSG00000103035, ENSG00000157625, ENSG00000173692, ENSG00000142507, ENSG00000150991, ENSG00000100906, ENSG0000…	3986	105	16792	1.36413	1	1	0.995482
GO:0008631	intrinsic apoptotic signaling pathway in response to oxidative stress	8	0.163332	0.0437356	1.35916	ENSG00000138061, ENSG00000171791, ENSG00000163932, ENSG00000152256, ENSG00000173545, ENSG00000140464, ENSG00000165304, ENSG00000102572	3986	15	16792	2.2468	1	1	0.995482
GO:0045190	isotype switching	8	0.163332	0.0437356	1.35916	ENSG00000156127, ENSG00000174371, ENSG00000112130, ENSG00000095002, ENSG00000012061, ENSG00000116062, ENSG00000107371, ENSG00000076242	3986	15	16792	2.2468	1	1	0.995482
GO:0006122	mitochondrial electron transport, ubiquinol to cytochrome c	8	0.163332	0.0437356	1.35916	ENSG00000156467, ENSG00000204922, ENSG00000127540, ENSG00000184076, ENSG00000169057, ENSG00000164405, ENSG00000169021, ENSG00000172115	3986	15	16792	2.2468	1	1	0.995482
GO:0048490	anterograde synaptic vesicle transport	8	0.163332	0.0437356	1.35916	ENSG00000196072, ENSG00000157823, ENSG00000047579, ENSG00000186222, ENSG00000070718, ENSG00000189114, ENSG00000143553, ENSG00000188428	3986	15	16792	2.2468	1	1	0.995482
GO:0043122	regulation of I-kappaB kinase/NF-kappaB signaling	8	0.163332	0.0437356	1.35916	ENSG00000166167, ENSG00000154188, ENSG00000161011, ENSG00000232810, ENSG00000142405, ENSG00000105483, ENSG00000214078, ENSG00000092529	3986	15	16792	2.2468	1	1	0.995482
GO:0034227	tRNA thio-modification	4	0.081666	0.043926	1.35728	ENSG00000124217, ENSG00000174177, ENSG00000142544, ENSG00000167118	3986	4	16792	4.21274	1	1	0.995482
GO:0060528	secretory columnal luminar epithelial cell differentiation involved in prostate glandular acinus development	4	0.081666	0.043926	1.35728	ENSG00000186350, ENSG00000148400, ENSG00000129514, ENSG00000116455	3986	4	16792	4.21274	1	1	0.995482
GO:0042373	vitamin K metabolic process	4	0.081666	0.043926	1.35728	ENSG00000196715, ENSG00000120942, ENSG00000167397, ENSG00000159228	3986	4	16792	4.21274	1	1	0.995482
GO:0051697	protein delipidation	4	0.081666	0.043926	1.35728	ENSG00000125703, ENSG00000130734, ENSG00000101844, ENSG00000168397	3986	4	16792	4.21274	1	1	0.995482
GO:0035246	peptidyl-arginine N-methylation	4	0.081666	0.043926	1.35728	ENSG00000162639, ENSG00000138081, ENSG00000100462, ENSG00000116455	3986	4	16792	4.21274	1	1	0.995482
GO:0032447	protein urmylation	4	0.081666	0.043926	1.35728	ENSG00000124217, ENSG00000174177, ENSG00000142544, ENSG00000167118	3986	4	16792	4.21274	1	1	0.995482
GO:0032210	regulation of telomere maintenance via telomerase	4	0.081666	0.043926	1.35728	ENSG00000070366, ENSG00000132604, ENSG00000173273, ENSG00000198952	3986	4	16792	4.21274	1	1	0.995482
GO:0046602	regulation of mitotic centrosome separation	4	0.081666	0.043926	1.35728	ENSG00000117650, ENSG00000138160, ENSG00000149554, ENSG00000130695	3986	4	16792	4.21274	1	1	0.995482
GO:0071763	nuclear membrane organization	4	0.081666	0.043926	1.35728	ENSG00000170876, ENSG00000143337, ENSG00000136816, ENSG00000136827	3986	4	16792	4.21274	1	1	0.995482
GO:0048386	positive regulation of retinoic acid receptor signaling pathway	4	0.081666	0.043926	1.35728	ENSG00000120798, ENSG00000175029, ENSG00000171456, ENSG00000221926	3986	4	16792	4.21274	1	1	0.995482
GO:0000045	autophagosome assembly	16	0.326664	0.044355	1.35306	ENSG00000157954, ENSG00000023287, ENSG00000130734, ENSG00000070540, ENSG00000110046, ENSG00000175224, ENSG00000153339, ENSG00000080815, ENSG00000198925, ENSG00000125703, ENSG00000141580, ENSG00000101844, ENSG00000057663, ENSG00000168397, ENSG00000123395, ENSG00000127774	3986	41	16792	1.644	1	1	0.995482
GO:0000278	mitotic cell cycle	16	0.326664	0.044355	1.35306	ENSG00000096401, ENSG00000114904, ENSG00000198176, ENSG00000130669, ENSG00000138778, ENSG00000180370, ENSG00000117724, ENSG00000119397, ENSG00000205250, ENSG00000102901, ENSG00000165660, ENSG00000149269, ENSG00000145241, ENSG00000221914, ENSG00000102572, ENSG00000163512	3986	41	16792	1.644	1	1	0.995482
GO:0010467	gene expression	18	0.367497	0.0455922	1.34111	ENSG00000092199, ENSG00000153187, ENSG00000181222, ENSG00000104824, ENSG00000073792, ENSG00000177700, ENSG00000113384, ENSG00000163882, ENSG00000136231, ENSG00000168002, ENSG00000169564, ENSG00000126945, ENSG00000005075, ENSG00000089775, ENSG00000144231, ENSG00000125651, ENSG00000169813, ENSG00000146457	3986	48	16792	1.57978	1	1	0.995482
GO:0033683	nucleotide-excision repair, DNA incision	15	0.306247	0.0482481	1.31652	ENSG00000136936, ENSG00000175482, ENSG00000133119, ENSG00000132646, ENSG00000134899, ENSG00000012061, ENSG00000111358, ENSG00000175595, ENSG00000035928, ENSG00000114026, ENSG00000150991, ENSG00000139842, ENSG00000170315, ENSG00000163161, ENSG00000272047	3986	38	16792	1.66293	1	1	0.995482
GO:0045931	positive regulation of mitotic cell cycle	12	0.244998	0.0485656	1.31367	ENSG00000135679, ENSG00000065243, ENSG00000139618, ENSG00000004142, ENSG00000187840, ENSG00000097007, ENSG00000134057, ENSG00000142192, ENSG00000089685, ENSG00000129514, ENSG00000176170, ENSG00000108861	3986	28	16792	1.80546	1	1	0.995482
GO:0006378	mRNA polyadenylation	12	0.244998	0.0485656	1.31367	ENSG00000111605, ENSG00000160917, ENSG00000160075, ENSG00000172409, ENSG00000014164, ENSG00000165494, ENSG00000149016, ENSG00000165934, ENSG00000101138, ENSG00000142192, ENSG00000090060, ENSG00000119203	3986	28	16792	1.80546	1	1	0.995482
GO:0006513	protein monoubiquitination	12	0.244998	0.0485656	1.31367	ENSG00000104343, ENSG00000086758, ENSG00000055130, ENSG00000108733, ENSG00000115392, ENSG00000132109, ENSG00000102858, ENSG00000109332, ENSG00000069869, ENSG00000107341, ENSG00000197579, ENSG00000130939	3986	28	16792	1.80546	1	1	0.995482
GO:0050790	regulation of catalytic activity	23	0.469579	0.0490497	1.30936	ENSG00000173281, ENSG00000109519, ENSG00000015285, ENSG00000213654, ENSG00000112208, ENSG00000138756, ENSG00000106617, ENSG00000154845, ENSG00000150712, ENSG00000111775, ENSG00000155657, ENSG00000151929, ENSG00000176915, ENSG00000169554, ENSG00000108061, ENSG00000119938, ENSG00000102931, ENSG00000078304, ENSG00000117090, ENSG00000221914, ENSG00000164733, ENSG00000185515, ENSG00000092529	3986	66	16792	1.46808	1	1	0.995482
GO:0030838	positive regulation of actin filament polymerization	17	0.34708	0.0497602	1.30312	ENSG00000198793, ENSG00000103490, ENSG00000128283, ENSG00000171132, ENSG00000071051, ENSG00000136238, ENSG00000156735, ENSG00000197879, ENSG00000196405, ENSG00000158092, ENSG00000163171, ENSG00000149798, ENSG00000101336, ENSG00000164327, ENSG00000165527, ENSG00000090339, ENSG00000167965	3986	45	16792	1.59148	1	1	0.995482
GO:0032147	activation of protein kinase activity	17	0.34708	0.0497602	1.30312	ENSG00000112715, ENSG00000118193, ENSG00000106617, ENSG00000175104, ENSG00000171105, ENSG00000060237, ENSG00000266173, ENSG00000121879, ENSG00000088325, ENSG00000101126, ENSG00000163513, ENSG00000163932, ENSG00000072518, ENSG00000092853, ENSG00000189403, ENSG00000103126, ENSG00000141564	3986	45	16792	1.59148	1	1	0.995482
GO:0006417	regulation of translation	19	0.387913	0.0501797	1.29947	ENSG00000105887, ENSG00000134627, ENSG00000142192, ENSG00000110367, ENSG00000116741, ENSG00000132300, ENSG00000173914, ENSG00000120963, ENSG00000118689, ENSG00000079277, ENSG00000205323, ENSG00000204842, ENSG00000125457, ENSG00000164587, ENSG00000089022, ENSG00000089154, ENSG00000182973, ENSG00000144895, ENSG00000105221	3986	52	16792	1.53927	1	1	0.995482
GO:0042273	ribosomal large subunit biogenesis	11	0.224581	0.0521508	1.28274	ENSG00000120314, ENSG00000133316, ENSG00000073536, ENSG00000132603, ENSG00000241127, ENSG00000148296, ENSG00000156928, ENSG00000100029, ENSG00000048162, ENSG00000173545, ENSG00000188846	3986	25	16792	1.85361	1	1	0.995482
GO:0022604	regulation of cell morphogenesis	11	0.224581	0.0521508	1.28274	ENSG00000165650, ENSG00000077549, ENSG00000197296, ENSG00000130559, ENSG00000147130, ENSG00000163867, ENSG00000019995, ENSG00000121741, ENSG00000134698, ENSG00000198218, ENSG00000136238	3986	25	16792	1.85361	1	1	0.995482
GO:0007179	transforming growth factor beta receptor signaling pathway	30	0.612495	0.0538874	1.26851	ENSG00000158769, ENSG00000157933, ENSG00000135966, ENSG00000175387, ENSG00000113658, ENSG00000157077, ENSG00000198742, ENSG00000177606, ENSG00000108389, ENSG00000104880, ENSG00000155090, ENSG00000140464, ENSG00000120693, ENSG00000140564, ENSG00000136603, ENSG00000112679, ENSG00000118260, ENSG00000033170, ENSG00000268861, ENSG00000170365, ENSG00000137834, ENSG00000170345, ENSG00000150991, ENSG0000…	3986	92	16792	1.37372	1	1	0.995482
GO:0031334	positive regulation of protein complex assembly	10	0.204165	0.0557588	1.25369	ENSG00000164808, ENSG00000112715, ENSG00000116030, ENSG00000217128, ENSG00000232810, ENSG00000149798, ENSG00000119906, ENSG00000082701, ENSG00000185104, ENSG00000138685	3986	22	16792	1.91488	1	1	0.995482
GO:0000717	nucleotide-excision repair, DNA duplex unwinding	10	0.204165	0.0557588	1.25369	ENSG00000136936, ENSG00000170315, ENSG00000119318, ENSG00000163161, ENSG00000111358, ENSG00000147400, ENSG00000150991, ENSG00000154767, ENSG00000139842, ENSG00000272047	3986	22	16792	1.91488	1	1	0.995482
GO:2001243	negative regulation of intrinsic apoptotic signaling pathway	10	0.204165	0.0557588	1.25369	ENSG00000051108, ENSG00000132436, ENSG00000129473, ENSG00000171791, ENSG00000119969, ENSG00000143384, ENSG00000175193, ENSG00000011422, ENSG00000213619, ENSG00000108179	3986	22	16792	1.91488	1	1	0.995482
GO:0002230	positive regulation of defense response to virus by host	10	0.204165	0.0557588	1.25369	ENSG00000110944, ENSG00000164430, ENSG00000104972, ENSG00000088888, ENSG00000103490, ENSG00000128829, ENSG00000184584, ENSG00000169375, ENSG00000134242, ENSG00000140464	3986	22	16792	1.91488	1	1	0.995482
GO:0032465	regulation of cytokinesis	10	0.204165	0.0557588	1.25369	ENSG00000115760, ENSG00000173846, ENSG00000139618, ENSG00000160014, ENSG00000162413, ENSG00000196455, ENSG00000147400, ENSG00000087586, ENSG00000241360, ENSG00000165689	3986	22	16792	1.91488	1	1	0.995482
GO:0034394	protein localization to cell surface	10	0.204165	0.0557588	1.25369	ENSG00000196924, ENSG00000154188, ENSG00000168036, ENSG00000170262, ENSG00000165527, ENSG00000198742, ENSG00000145362, ENSG00000114316, ENSG00000117899, ENSG00000035403	3986	22	16792	1.91488	1	1	0.995482
GO:0006470	protein dephosphorylation	39	0.796243	0.0578688	1.23756	ENSG00000003987, ENSG00000173281, ENSG00000148660, ENSG00000112425, ENSG00000154845, ENSG00000113575, ENSG00000171862, ENSG00000172115, ENSG00000081913, ENSG00000138032, ENSG00000141298, ENSG00000060069, ENSG00000120910, ENSG00000127947, ENSG00000275052, ENSG00000155093, ENSG00000108389, ENSG00000221914, ENSG00000143851, ENSG00000103381, ENSG00000112679, ENSG00000171791, ENSG00000163629, ENSG0000…	3986	126	16792	1.30394	1	1	0.995482
GO:0045672	positive regulation of osteoclast differentiation	9	0.183748	0.059224	1.2275	ENSG00000110944, ENSG00000232810, ENSG00000118260, ENSG00000175104, ENSG00000163823, ENSG00000155846, ENSG00000170345, ENSG00000149635, ENSG00000155090	3986	19	16792	1.99551	1	1	0.995482
GO:0051298	centrosome duplication	9	0.183748	0.059224	1.2275	ENSG00000072864, ENSG00000103995, ENSG00000139618, ENSG00000175216, ENSG00000126216, ENSG00000137822, ENSG00000104728, ENSG00000123473, ENSG00000128159	3986	19	16792	1.99551	1	1	0.995482
GO:0008156	negative regulation of DNA replication	9	0.183748	0.059224	1.2275	ENSG00000175054, ENSG00000125482, ENSG00000186575, ENSG00000062650, ENSG00000112312, ENSG00000107937, ENSG00000152942, ENSG00000140326, ENSG00000094804	3986	19	16792	1.99551	1	1	0.995482
GO:0008219	cell death	15	0.306247	0.0593616	1.22649	ENSG00000075426, ENSG00000213024, ENSG00000141837, ENSG00000134452, ENSG00000110321, ENSG00000173327, ENSG00000155876, ENSG00000171700, ENSG00000135241, ENSG00000188566, ENSG00000102699, ENSG00000142867, ENSG00000091436, ENSG00000185104, ENSG00000103126	3986	39	16792	1.62029	1	1	0.995482
GO:0006487	protein N-linked glycosylation	15	0.306247	0.0593616	1.22649	ENSG00000027847, ENSG00000182858, ENSG00000033170, ENSG00000167130, ENSG00000168282, ENSG00000117643, ENSG00000008513, ENSG00000115275, ENSG00000196968, ENSG00000140650, ENSG00000100417, ENSG00000172728, ENSG00000088035, ENSG00000013375, ENSG00000086062	3986	39	16792	1.62029	1	1	0.995482
GO:2000144	positive regulation of DNA-templated transcription, initiation	5	0.102082	0.0594019	1.2262	ENSG00000175592, ENSG00000107290, ENSG00000168036, ENSG00000029363, ENSG00000177606	3986	7	16792	3.0091	1	1	0.995482
GO:1901029	negative regulation of mitochondrial outer membrane permeabilization involved in apoptotic signaling pathway	5	0.102082	0.0594019	1.2262	ENSG00000204389, ENSG00000204388, ENSG00000213699, ENSG00000156968, ENSG00000167315	3986	7	16792	3.0091	1	1	0.995482
GO:0031848	protection from non-homologous end joining at telomere	5	0.102082	0.0594019	1.2262	ENSG00000118655, ENSG00000100109, ENSG00000132604, ENSG00000152457, ENSG00000198924	3986	7	16792	3.0091	1	1	0.995482
GO:0046826	negative regulation of protein export from nucleus	5	0.102082	0.0594019	1.2262	ENSG00000116288, ENSG00000067066, ENSG00000138376, ENSG00000100401, ENSG00000124766	3986	7	16792	3.0091	1	1	0.995482
GO:0031396	regulation of protein ubiquitination	8	0.163332	0.0622447	1.2059	ENSG00000051108, ENSG00000204389, ENSG00000204388, ENSG00000170881, ENSG00000173960, ENSG00000204209, ENSG00000080824, ENSG00000181788	3986	16	16792	2.10637	1	1	0.995482
GO:0000712	resolution of meiotic recombination intermediates	8	0.163332	0.0622447	1.2059	ENSG00000187790, ENSG00000175595, ENSG00000251503, ENSG00000197774, ENSG00000175279, ENSG00000076242, ENSG00000188827, ENSG00000154920	3986	16	16792	2.10637	1	1	0.995482
GO:0033617	mitochondrial respiratory chain complex IV assembly	8	0.163332	0.0622447	1.2059	ENSG00000232838, ENSG00000133028, ENSG00000106603, ENSG00000075336, ENSG00000250317, ENSG00000181924, ENSG00000183513, ENSG00000240230	3986	16	16792	2.10637	1	1	0.995482
GO:0031398	positive regulation of protein ubiquitination	22	0.449163	0.0625588	1.20371	ENSG00000154188, ENSG00000104312, ENSG00000044574, ENSG00000175104, ENSG00000175279, ENSG00000197329, ENSG00000040633, ENSG00000170315, ENSG00000114062, ENSG00000101966, ENSG00000185651, ENSG00000139174, ENSG00000266094, ENSG00000251503, ENSG00000157450, ENSG00000142867, ENSG00000109670, ENSG00000184675, ENSG00000103126, ENSG00000103266, ENSG00000176170, ENSG00000127666	3986	64	16792	1.44813	1	1	0.995482
GO:0030512	negative regulation of transforming growth factor beta receptor signaling pathway	22	0.449163	0.0625588	1.20371	ENSG00000157933, ENSG00000151694, ENSG00000136603, ENSG00000175387, ENSG00000044574, ENSG00000198742, ENSG00000171310, ENSG00000137834, ENSG00000176973, ENSG00000150991, ENSG00000112200, ENSG00000170315, ENSG00000100219, ENSG00000168675, ENSG00000204389, ENSG00000100614, ENSG00000163513, ENSG00000096717, ENSG00000090863, ENSG00000108389, ENSG00000103266, ENSG00000079805	3986	64	16792	1.44813	1	1	0.995482
GO:1903955	positive regulation of protein targeting to mitochondrion	28	0.571662	0.0639904	1.19389	ENSG00000116809, ENSG00000084090, ENSG00000204390, ENSG00000169385, ENSG00000115317, ENSG00000213625, ENSG00000175224, ENSG00000136930, ENSG00000099341, ENSG00000086758, ENSG00000185651, ENSG00000160695, ENSG00000109332, ENSG00000109670, ENSG00000128340, ENSG00000070770, ENSG00000114315, ENSG00000171596, ENSG00000177479, ENSG00000198911, ENSG00000055483, ENSG00000142794, ENSG00000142230, ENSG0000…	3986	86	16792	1.37159	1	1	0.995482
GO:0001510	RNA methylation	6	0.122499	0.0641246	1.19298	ENSG00000146834, ENSG00000162639, ENSG00000099899, ENSG00000186666, ENSG00000171861, ENSG00000068438	3986	10	16792	2.52765	1	1	0.995482
GO:0051085	chaperone mediated protein folding requiring cofactor	6	0.122499	0.0641246	1.19298	ENSG00000144381, ENSG00000136816, ENSG00000136827, ENSG00000132002, ENSG00000109971, ENSG00000120694	3986	10	16792	2.52765	1	1	0.995482
GO:0015937	coenzyme A biosynthetic process	6	0.122499	0.0641246	1.19298	ENSG00000068120, ENSG00000152782, ENSG00000120137, ENSG00000125779, ENSG00000127125, ENSG00000138621	3986	10	16792	2.52765	1	1	0.995482
GO:0090084	negative regulation of inclusion body assembly	6	0.122499	0.0641246	1.19298	ENSG00000105993, ENSG00000204389, ENSG00000151835, ENSG00000204388, ENSG00000185122, ENSG00000132002	3986	10	16792	2.52765	1	1	0.995482
GO:0000290	deadenylation-dependent decapping of nuclear-transcribed mRNA	6	0.122499	0.0641246	1.19298	ENSG00000151065, ENSG00000172795, ENSG00000175324, ENSG00000272886, ENSG00000151014, ENSG00000152520	3986	10	16792	2.52765	1	1	0.995482
GO:0060334	regulation of interferon-gamma-mediated signaling pathway	7	0.142915	0.0642539	1.1921	ENSG00000116030, ENSG00000027697, ENSG00000159128, ENSG00000185338, ENSG00000184557, ENSG00000033800, ENSG00000162434	3986	13	16792	2.2684	1	1	0.995482
GO:0033962	cytoplasmic mRNA processing body assembly	7	0.142915	0.0642539	1.1921	ENSG00000130520, ENSG00000204842, ENSG00000144791, ENSG00000135870, ENSG00000170860, ENSG00000110367, ENSG00000151014	3986	13	16792	2.2684	1	1	0.995482
GO:0001522	pseudouridine synthesis	7	0.142915	0.0642539	1.1921	ENSG00000162927, ENSG00000110060, ENSG00000167112, ENSG00000156990, ENSG00000177192, ENSG00000091127, ENSG00000182117	3986	13	16792	2.2684	1	1	0.995482
GO:0019985	translesion synthesis	14	0.285831	0.0648856	1.18785	ENSG00000175482, ENSG00000133119, ENSG00000132646, ENSG00000103194, ENSG00000130997, ENSG00000035928, ENSG00000150991, ENSG00000009413, ENSG00000170734, ENSG00000170315, ENSG00000126804, ENSG00000166803, ENSG00000259316, ENSG00000164306, ENSG00000162585	3986	36	16792	1.63829	1	1	0.995482
GO:0007040	lysosome organization	14	0.285831	0.0648856	1.18785	ENSG00000051009, ENSG00000103174, ENSG00000112561, ENSG00000134575, ENSG00000113273, ENSG00000162341, ENSG00000143669, ENSG00000160695, ENSG00000140943, ENSG00000100099, ENSG00000104142, ENSG00000107521, ENSG00000187626, ENSG00000108784	3986	36	16792	1.63829	1	1	0.995482
GO:0006352	DNA-templated transcription, initiation	14	0.285831	0.0648856	1.18785	ENSG00000028839, ENSG00000137947, ENSG00000090971, ENSG00000178913, ENSG00000198646, ENSG00000136997, ENSG00000112592, ENSG00000148835, ENSG00000276966, ENSG00000141384, ENSG00000106290, ENSG00000162227, ENSG00000270882, ENSG00000104221	3986	36	16792	1.63829	1	1	0.995482
GO:0010506	regulation of autophagy	18	0.367497	0.0653822	1.18454	ENSG00000177169, ENSG00000103194, ENSG00000148572, ENSG00000103490, ENSG00000105647, ENSG00000097007, ENSG00000127580, ENSG00000116954, ENSG00000137752, ENSG00000083750, ENSG00000149639, ENSG00000100219, ENSG00000162341, ENSG00000150867, ENSG00000268173, ENSG00000189403, ENSG00000156171, ENSG00000163565, ENSG00000143322	3986	50	16792	1.51659	1	1	0.995482
GO:0051865	protein autoubiquitination	18	0.367497	0.0653822	1.18454	ENSG00000181852, ENSG00000135679, ENSG00000132109, ENSG00000123091, ENSG00000198862, ENSG00000175104, ENSG00000173821, ENSG00000080802, ENSG00000112130, ENSG00000204977, ENSG00000114062, ENSG00000187147, ENSG00000103429, ENSG00000118518, ENSG00000109332, ENSG00000147854, ENSG00000130939, ENSG00000103266	3986	50	16792	1.51659	1	1	0.995482
GO:0050728	negative regulation of inflammatory response	26	0.530829	0.0668729	1.17475	ENSG00000154124, ENSG00000160703, ENSG00000175344, ENSG00000128271, ENSG00000179526, ENSG00000171522, ENSG00000168078, ENSG00000162711, ENSG00000142405, ENSG00000128016, ENSG00000136826, ENSG00000171150, ENSG00000176845, ENSG00000112033, ENSG00000159842, ENSG00000132386, ENSG00000154710, ENSG00000163154, ENSG00000118503, ENSG00000166664, ENSG00000109320, ENSG00000163932, ENSG00000141965, ENSG0000…	3986	79	16792	1.38647	1	1	0.995482
GO:0016485	protein processing	24	0.489996	0.069727	1.1566	ENSG00000089041, ENSG00000181027, ENSG00000156521, ENSG00000160613, ENSG00000130734, ENSG00000107959, ENSG00000138613, ENSG00000172232, ENSG00000196236, ENSG00000117525, ENSG00000111142, ENSG00000135678, ENSG00000080815, ENSG00000137752, ENSG00000117362, ENSG00000125703, ENSG00000168014, ENSG00000101844, ENSG00000168397, ENSG00000078304, ENSG00000140479, ENSG00000108582, ENSG00000175193, ENSG0000…	3986	72	16792	1.40425	1	1	0.995482
GO:0002931	response to ischemia	13	0.265414	0.0709596	1.14899	ENSG00000110218, ENSG00000132326, ENSG00000184719, ENSG00000103150, ENSG00000144381, ENSG00000171791, ENSG00000159399, ENSG00000120738, ENSG00000103319, ENSG00000187840, ENSG00000165660, ENSG00000167658, ENSG00000108179	3986	33	16792	1.65957	1	1	0.995482
GO:0070936	protein K48-linked ubiquitination	17	0.34708	0.071687	1.14456	ENSG00000099804, ENSG00000092871, ENSG00000197579, ENSG00000177479, ENSG00000170633, ENSG00000197329, ENSG00000112343, ENSG00000112130, ENSG00000118503, ENSG00000114062, ENSG00000103429, ENSG00000186187, ENSG00000118518, ENSG00000109332, ENSG00000107341, ENSG00000011275, ENSG00000078967	3986	47	16792	1.52376	1	1	0.995482
GO:0006295	nucleotide-excision repair, DNA incision, 3'-to lesion	10	0.204165	0.0729432	1.13702	ENSG00000136936, ENSG00000134899, ENSG00000270181, ENSG00000012061, ENSG00000163161, ENSG00000111358, ENSG00000175595, ENSG00000134897, ENSG00000139842, ENSG00000272047	3986	23	16792	1.83163	1	1	0.995482
GO:0006606	protein import into nucleus	20	0.40833	0.0750197	1.12482	ENSG00000093000, ENSG00000149196, ENSG00000025800, ENSG00000099901, ENSG00000108424, ENSG00000213024, ENSG00000132341, ENSG00000196313, ENSG00000169371, ENSG00000265972, ENSG00000204569, ENSG00000114030, ENSG00000124789, ENSG00000139174, ENSG00000160294, ENSG00000102898, ENSG00000101146, ENSG00000102753, ENSG00000126883, ENSG00000160710	3986	58	16792	1.45267	1	1	0.995482
GO:0044344	cellular response to fibroblast growth factor stimulus	12	0.244998	0.0776393	1.10992	ENSG00000096401, ENSG00000068001, ENSG00000152518, ENSG00000001084, ENSG00000107290, ENSG00000179388, ENSG00000147465, ENSG00000119185, ENSG00000123358, ENSG00000117139, ENSG00000136997, ENSG00000128016	3986	30	16792	1.6851	1	1	0.995482
GO:0007077	mitotic nuclear envelope disassembly	16	0.326664	0.0786808	1.10413	ENSG00000110713, ENSG00000093000, ENSG00000160789, ENSG00000213024, ENSG00000134057, ENSG00000196313, ENSG00000175334, ENSG00000136243, ENSG00000175826, ENSG00000138750, ENSG00000124789, ENSG00000030066, ENSG00000119408, ENSG00000101146, ENSG00000126883, ENSG00000058804	3986	44	16792	1.53191	1	1	0.995482
GO:0032438	melanosome organization	9	0.183748	0.0788439	1.10323	ENSG00000196072, ENSG00000047579, ENSG00000186222, ENSG00000143669, ENSG00000189114, ENSG00000117280, ENSG00000072958, ENSG00000143553, ENSG00000188428	3986	20	16792	1.89574	1	1	0.995482
GO:0051568	histone H3-K4 methylation	9	0.183748	0.0788439	1.10323	ENSG00000147050, ENSG00000055609, ENSG00000005483, ENSG00000139718, ENSG00000116539, ENSG00000164091, ENSG00000170364, ENSG00000167548, ENSG00000118058	3986	20	16792	1.89574	1	1	0.995482
GO:0001892	embryonic placenta development	9	0.183748	0.0788439	1.10323	ENSG00000179348, ENSG00000164442, ENSG00000245848, ENSG00000172845, ENSG00000100644, ENSG00000185122, ENSG00000112561, ENSG00000172216, ENSG00000171634	3986	20	16792	1.89574	1	1	0.995482
GO:0009791	post-embryonic development	24	0.489996	0.0797673	1.09818	ENSG00000153234, ENSG00000159307, ENSG00000198198, ENSG00000146085, ENSG00000198793, ENSG00000175387, ENSG00000171791, ENSG00000150347, ENSG00000204120, ENSG00000138834, ENSG00000171310, ENSG00000172893, ENSG00000117139, ENSG00000080815, ENSG00000118058, ENSG00000112294, ENSG00000169057, ENSG00000163482, ENSG00000056586, ENSG00000163348, ENSG00000163659, ENSG00000168769, ENSG00000126003, ENSG0000…	3986	73	16792	1.38501	1	1	0.995482
GO:0006364	rRNA processing	61	1.24541	0.0811891	1.0905	ENSG00000213782, ENSG00000110104, ENSG00000119285, ENSG00000171861, ENSG00000120314, ENSG00000083520, ENSG00000142541, ENSG00000120158, ENSG00000136891, ENSG00000182362, ENSG00000100029, ENSG00000164338, ENSG00000107371, ENSG00000167526, ENSG00000182841, ENSG00000058729, ENSG00000148688, ENSG00000272047, ENSG00000065183, ENSG00000177971, ENSG00000156697, ENSG00000241945, ENSG00000138326, ENSG0000…	3986	214	16792	1.20083	1	1	0.995482
GO:0002244	hematopoietic progenitor cell differentiation	22	0.449163	0.0834133	1.07876	ENSG00000105676, ENSG00000068001, ENSG00000155189, ENSG00000069424, ENSG00000103061, ENSG00000171320, ENSG00000152213, ENSG00000117523, ENSG00000080815, ENSG00000112365, ENSG00000157216, ENSG00000066827, ENSG00000142046, ENSG00000164442, ENSG00000011426, ENSG00000169375, ENSG00000166428, ENSG00000167658, ENSG00000160710, ENSG00000103245, ENSG00000221869, ENSG00000103056	3986	66	16792	1.40425	1	1	0.995482
GO:0048568	embryonic organ development	8	0.163332	0.0848368	1.07142	ENSG00000071655, ENSG00000119318, ENSG00000012061, ENSG00000163161, ENSG00000063245, ENSG00000083093, ENSG00000177084, ENSG00000122257	3986	17	16792	1.98247	1	1	0.995482
GO:0042789	mRNA transcription from RNA polymerase II promoter	8	0.163332	0.0848368	1.07142	ENSG00000175197, ENSG00000196924, ENSG00000204531, ENSG00000100644, ENSG00000128272, ENSG00000126804, ENSG00000109111, ENSG00000135363	3986	17	16792	1.98247	1	1	0.995482
GO:0006891	intra-Golgi vesicle-mediated transport	11	0.224581	0.0849825	1.07067	ENSG00000122218, ENSG00000160218, ENSG00000154917, ENSG00000272617, ENSG00000100568, ENSG00000213380, ENSG00000184432, ENSG00000108433, ENSG00000108587, ENSG00000090615, ENSG00000135775, ENSG00000151532	3986	27	16792	1.7163	1	1	0.995482
GO:0051225	spindle assembly	11	0.224581	0.0849825	1.07067	ENSG00000214367, ENSG00000141551, ENSG00000117650, ENSG00000128908, ENSG00000196230, ENSG00000180198, ENSG00000173273, ENSG00000119408, ENSG00000131351, ENSG00000141027, ENSG00000147874	3986	27	16792	1.7163	1	1	0.995482
GO:0031397	negative regulation of protein ubiquitination	15	0.306247	0.0864568	1.0632	ENSG00000132326, ENSG00000198793, ENSG00000147099, ENSG00000147162, ENSG00000107937, ENSG00000171132, ENSG00000114316, ENSG00000116288, ENSG00000118503, ENSG00000204389, ENSG00000001084, ENSG00000204388, ENSG00000167693, ENSG00000102921, ENSG00000124766	3986	41	16792	1.54125	1	1	0.995482
GO:0006626	protein targeting to mitochondrion	13	0.265414	0.0868724	1.06112	ENSG00000130204, ENSG00000122085, ENSG00000134375, ENSG00000132286, ENSG00000265354, ENSG00000150779, ENSG00000169100, ENSG00000134809, ENSG00000100225, ENSG00000177370, ENSG00000015475, ENSG00000072756, ENSG00000104980	3986	34	16792	1.61076	1	1	0.995482
GO:0001932	regulation of protein phosphorylation	13	0.265414	0.0868724	1.06112	ENSG00000105851, ENSG00000130766, ENSG00000217128, ENSG00000108819, ENSG00000196576, ENSG00000196664, ENSG00000169398, ENSG00000254087, ENSG00000015133, ENSG00000185338, ENSG00000184557, ENSG00000276234, ENSG00000140464	3986	34	16792	1.61076	1	1	0.995482
GO:0036498	IRE1-mediated unfolded protein response	20	0.40833	0.0869689	1.06064	ENSG00000116809, ENSG00000074842, ENSG00000160789, ENSG00000044574, ENSG00000128590, ENSG00000070540, ENSG00000175215, ENSG00000178607, ENSG00000159720, ENSG00000157014, ENSG00000138674, ENSG00000058262, ENSG00000100219, ENSG00000144867, ENSG00000138073, ENSG00000124702, ENSG00000044090, ENSG00000108433, ENSG00000143870, ENSG00000101199, ENSG00000272410	3986	59	16792	1.42805	1	1	0.995482
GO:0007265	Ras protein signal transduction	23	0.469579	0.0871973	1.0595	ENSG00000146094, ENSG00000131845, ENSG00000114738, ENSG00000099942, ENSG00000177606, ENSG00000138757, ENSG00000138685, ENSG00000137575, ENSG00000196712, ENSG00000187164, ENSG00000141068, ENSG00000143379, ENSG00000116288, ENSG00000006451, ENSG00000158186, ENSG00000185386, ENSG00000108061, ENSG00000160271, ENSG00000147443, ENSG00000089022, ENSG00000124782, ENSG00000237441, ENSG00000145632	3986	70	16792	1.38419	1	1	0.995482
GO:0006406	mRNA export from nucleus	31	0.632911	0.0892608	1.04934	ENSG00000093000, ENSG00000070366, ENSG00000213024, ENSG00000005007, ENSG00000119203, ENSG00000138750, ENSG00000205323, ENSG00000100227, ENSG00000188529, ENSG00000058804, ENSG00000110713, ENSG00000151461, ENSG00000140829, ENSG00000160679, ENSG00000198952, ENSG00000137656, ENSG00000196313, ENSG00000111786, ENSG00000136243, ENSG00000116698, ENSG00000132661, ENSG00000058673, ENSG00000079134, ENSG0000…	3986	100	16792	1.30595	1	1	0.995482
GO:1901224	positive regulation of NIK/NF-kappaB signaling	7	0.142915	0.0905604	1.04306	ENSG00000130402, ENSG00000232810, ENSG00000056586, ENSG00000135870, ENSG00000111961, ENSG00000189403, ENSG00000106100	3986	14	16792	2.10637	1	1	0.995482
GO:0031573	intra-S DNA damage checkpoint	7	0.142915	0.0905604	1.04306	ENSG00000095002, ENSG00000197774, ENSG00000137337, ENSG00000075131, ENSG00000020922, ENSG00000154920, ENSG00000154767	3986	14	16792	2.10637	1	1	0.995482
GO:0030490	maturation of SSU-rRNA	7	0.142915	0.0905604	1.04306	ENSG00000141101, ENSG00000124383, ENSG00000156697, ENSG00000253797, ENSG00000100138, ENSG00000130935, ENSG00000164587	3986	14	16792	2.10637	1	1	0.995482
GO:0070345	negative regulation of fat cell proliferation	4	0.081666	0.0905615	1.04306	ENSG00000179348, ENSG00000198176, ENSG00000132326, ENSG00000101412	3986	5	16792	3.3702	1	1	0.995482
GO:1903912	negative regulation of endoplasmic reticulum stress-induced eIF2 alpha phosphorylation	4	0.081666	0.0905615	1.04306	ENSG00000158092, ENSG00000158615, ENSG00000071051, ENSG00000087074	3986	5	16792	3.3702	1	1	0.995482
GO:0032611	interleukin-1 beta production	4	0.081666	0.0905615	1.04306	ENSG00000103490, ENSG00000162711, ENSG00000153029, ENSG00000137752	3986	5	16792	3.3702	1	1	0.995482
GO:0010891	negative regulation of sequestering of triglyceride	4	0.081666	0.0905615	1.04306	ENSG00000132170, ENSG00000186951, ENSG00000011198, ENSG00000177666	3986	5	16792	3.3702	1	1	0.995482
GO:0036124	histone H3-K9 trimethylation	4	0.081666	0.0905615	1.04306	ENSG00000101945, ENSG00000054267, ENSG00000032219, ENSG00000152455	3986	5	16792	3.3702	1	1	0.995482
GO:1904385	cellular response to angiotensin	4	0.081666	0.0905615	1.04306	ENSG00000185122, ENSG00000163932, ENSG00000136997, ENSG00000094804	3986	5	16792	3.3702	1	1	0.995482
GO:0002082	regulation of oxidative phosphorylation	4	0.081666	0.0905615	1.04306	ENSG00000165240, ENSG00000125648, ENSG00000137288, ENSG00000171612	3986	5	16792	3.3702	1	1	0.995482
GO:1903898	negative regulation of PERK-mediated unfolded protein response	4	0.081666	0.0905615	1.04306	ENSG00000158092, ENSG00000158615, ENSG00000071051, ENSG00000087074	3986	5	16792	3.3702	1	1	0.995482
GO:0018193	peptidyl-amino acid modification	4	0.081666	0.0905615	1.04306	ENSG00000170854, ENSG00000174939, ENSG00000170468, ENSG00000128203	3986	5	16792	3.3702	1	1	0.995482
GO:1900180	regulation of protein localization to nucleus	4	0.081666	0.0905615	1.04306	ENSG00000160789, ENSG00000186575, ENSG00000164690, ENSG00000266094	3986	5	16792	3.3702	1	1	0.995482
GO:1904885	beta-catenin destruction complex assembly	4	0.081666	0.0905615	1.04306	ENSG00000082701, ENSG00000184675, ENSG00000103126, ENSG00000134982	3986	5	16792	3.3702	1	1	0.995482
GO:0045910	negative regulation of DNA recombination	4	0.081666	0.0905615	1.04306	ENSG00000095002, ENSG00000197299, ENSG00000116062, ENSG00000121988	3986	5	16792	3.3702	1	1	0.995482
GO:0007030	Golgi organization	24	0.489996	0.090733	1.04223	ENSG00000197386, ENSG00000114988, ENSG00000066455, ENSG00000173230, ENSG00000074054, ENSG00000173960, ENSG00000174989, ENSG00000116786, ENSG00000135775, ENSG00000081923, ENSG00000100815, ENSG00000141376, ENSG00000117475, ENSG00000143457, ENSG00000141551, ENSG00000113384, ENSG00000088833, ENSG00000125875, ENSG00000117280, ENSG00000044090, ENSG00000107651, ENSG00000104043, ENSG00000182446, ENSG0000…	3986	74	16792	1.3663	1	1	0.995482
GO:0034244	negative regulation of transcription elongation from RNA polymerase II promoter	6	0.122499	0.0952234	1.02126	ENSG00000213246, ENSG00000112130, ENSG00000108469, ENSG00000164690, ENSG00000129518, ENSG00000103126	3986	11	16792	2.29786	1	1	0.995482
GO:0042347	negative regulation of NF-kappaB import into nucleus	6	0.122499	0.0952234	1.02126	ENSG00000138032, ENSG00000189067, ENSG00000083799, ENSG00000100614, ENSG00000162711, ENSG00000072803	3986	11	16792	2.29786	1	1	0.995482
GO:0070914	UV-damage excision repair	6	0.122499	0.0952234	1.02126	ENSG00000136936, ENSG00000258839, ENSG00000128908, ENSG00000012061, ENSG00000096717, ENSG00000154767	3986	11	16792	2.29786	1	1	0.995482
GO:0071479	cellular response to ionizing radiation	12	0.244998	0.095539	1.01982	ENSG00000164808, ENSG00000128908, ENSG00000132436, ENSG00000136560, ENSG00000116717, ENSG00000197299, ENSG00000096717, ENSG00000175854, ENSG00000143493, ENSG00000104529, ENSG00000113456, ENSG00000163565	3986	31	16792	1.63074	1	1	0.995482
GO:0019058	viral life cycle	12	0.244998	0.095539	1.01982	ENSG00000115561, ENSG00000170315, ENSG00000132612, ENSG00000150991, ENSG00000155975, ENSG00000170248, ENSG00000140564, ENSG00000147457, ENSG00000139722, ENSG00000176108, ENSG00000180479, ENSG00000009844	3986	31	16792	1.63074	1	1	0.995482
GO:0036258	multivesicular body assembly	12	0.244998	0.095539	1.01982	ENSG00000115561, ENSG00000132612, ENSG00000185359, ENSG00000131165, ENSG00000182149, ENSG00000155975, ENSG00000170248, ENSG00000147457, ENSG00000131475, ENSG00000139722, ENSG00000176108, ENSG00000009844	3986	31	16792	1.63074	1	1	0.995482
GO:0000059	protein import into nucleus, docking	5	0.102082	0.0969526	1.01344	ENSG00000110713, ENSG00000065150, ENSG00000105576, ENSG00000108424, ENSG00000196497	3986	8	16792	2.63297	1	1	0.995482
GO:2001020	regulation of response to DNA damage stimulus	5	0.102082	0.0969526	1.01344	ENSG00000114904, ENSG00000137331, ENSG00000097007, ENSG00000143384, ENSG00000132906	3986	8	16792	2.63297	1	1	0.995482
GO:0034551	mitochondrial respiratory chain complex III assembly	5	0.102082	0.0969526	1.01344	ENSG00000156467, ENSG00000204922, ENSG00000184076, ENSG00000137288, ENSG00000171612	3986	8	16792	2.63297	1	1	0.995482
GO:0002115	store-operated calcium entry	5	0.102082	0.0969526	1.01344	ENSG00000175938, ENSG00000109689, ENSG00000130038, ENSG00000160991, ENSG00000276045	3986	8	16792	2.63297	1	1	0.995482
GO:0032688	negative regulation of interferon-beta production	5	0.102082	0.0969526	1.01344	ENSG00000138032, ENSG00000160703, ENSG00000103490, ENSG00000183763, ENSG00000105298	3986	8	16792	2.63297	1	1	0.995482
GO:0018026	peptidyl-lysine monomethylation	5	0.102082	0.0969526	1.01344	ENSG00000145391, ENSG00000103037, ENSG00000118058, ENSG00000181090, ENSG00000143499	3986	8	16792	2.63297	1	1	0.995482
GO:0017183	peptidyl-diphthamide biosynthetic process from peptidyl-histidine	5	0.102082	0.0969526	1.01344	ENSG00000108963, ENSG00000154813, ENSG00000148399, ENSG00000167658, ENSG00000117543	3986	8	16792	2.63297	1	1	0.995482
GO:0000226	microtubule cytoskeleton organization	23	0.469579	0.0991438	1.00373	ENSG00000128487, ENSG00000130479, ENSG00000075413, ENSG00000114999, ENSG00000112659, ENSG00000129680, ENSG00000136861, ENSG00000173786, ENSG00000109917, ENSG00000074054, ENSG00000066427, ENSG00000166483, ENSG00000143924, ENSG00000169398, ENSG00000151914, ENSG00000163635, ENSG00000072518, ENSG00000044090, ENSG00000160299, ENSG00000089685, ENSG00000180834, ENSG00000034677, ENSG00000100285	3986	71	16792	1.36469	1	1	0.995482
GO:0071260	cellular response to mechanical stimulus	23	0.469579	0.0991438	1.00373	ENSG00000095015, ENSG00000090020, ENSG00000105887, ENSG00000116717, ENSG00000104689, ENSG00000064012, ENSG00000120949, ENSG00000196664, ENSG00000111321, ENSG00000171522, ENSG00000136238, ENSG00000137752, ENSG00000172936, ENSG00000151929, ENSG00000134294, ENSG00000001084, ENSG00000120889, ENSG00000109320, ENSG00000142867, ENSG00000149554, ENSG00000163399, ENSG00000067182, ENSG00000169967	3986	71	16792	1.36469	1	1	0.995482
GO:0007254	JNK cascade	17	0.34708	0.0992138	1.00343	ENSG00000129675, ENSG00000157625, ENSG00000104312, ENSG00000099942, ENSG00000173334, ENSG00000175104, ENSG00000171522, ENSG00000173327, ENSG00000150991, ENSG00000172936, ENSG00000170425, ENSG00000170315, ENSG00000232810, ENSG00000143507, ENSG00000106100, ENSG00000055208, ENSG00000073803	3986	49	16792	1.46156	1	1	0.995482

## Sheet: Hypermethylation
Supplementary Table S3. GO enrichment analysis of differentially m6A methylated genes. - Hypermethylation
Term	Definition	Count	%	PValue	Significance	Genes	List Total	Pop Hits	Pop Total	Fold Enrichment	Bonferroni	Benjamini	FDR
GO:0006351	transcription, DNA-templated	327	13.8736	1.82241e-11	10.7394	ENSG00000197372, ENSG00000198464, ENSG00000197013, ENSG00000197256, ENSG00000113658, ENSG00000114744, ENSG00000137504, ENSG00000119760, ENSG00000179943, ENSG00000177888, ENSG00000075292, ENSG00000112200, ENSG00000261221, ENSG00000189079, ENSG00000119403, ENSG00000061337, ENSG00000127946, ENSG00000100105, ENSG00000081189, ENSG00000078699, ENSG00000185278, ENSG00000164576, ENSG00000141456, ENSG0000…	1998	1955	16792	1.40575	8.69289e-08	8.6929e-08	8.63458e-08
GO:0016569	covalent chromatin modification	39	1.65465	1.06389e-09	8.9731	ENSG00000163939, ENSG00000106723, ENSG00000071794, ENSG00000117713, ENSG00000139687, ENSG00000011258, ENSG00000189079, ENSG00000171316, ENSG00000119403, ENSG00000140320, ENSG00000100888, ENSG00000204256, ENSG00000140382, ENSG00000085224, ENSG00000085185, ENSG00000103479, ENSG00000143033, ENSG00000185811, ENSG00000169925, ENSG00000163322, ENSG00000184402, ENSG00000124795, ENSG00000173473, ENSG0000…	1998	113	16792	2.90064	5.07476e-06	2.53739e-06	2.52036e-06
GO:0000398	mRNA splicing, via spliceosome	58	2.46076	1.03633e-08	7.9845	ENSG00000133226, ENSG00000092199, ENSG00000165819, ENSG00000164609, ENSG00000039123, ENSG00000077312, ENSG00000114503, ENSG00000065978, ENSG00000134597, ENSG00000060688, ENSG00000145216, ENSG00000139168, ENSG00000100941, ENSG00000149532, ENSG00000183258, ENSG00000126698, ENSG00000184209, ENSG00000153187, ENSG00000096746, ENSG00000105705, ENSG00000170860, ENSG00000116754, ENSG00000177733, ENSG0000…	1998	222	16792	2.19575	4.94318e-05	1.64777e-05	1.63671e-05
GO:0051301	cell division	76	3.22444	2.30802e-07	6.63676	ENSG00000114904, ENSG00000072501, ENSG00000118193, ENSG00000113812, ENSG00000113810, ENSG00000075131, ENSG00000138758, ENSG00000097046, ENSG00000139687, ENSG00000133104, ENSG00000004897, ENSG00000175305, ENSG00000136098, ENSG00000151849, ENSG00000100106, ENSG00000108100, ENSG00000147874, ENSG00000183955, ENSG00000136824, ENSG00000156256, ENSG00000182628, ENSG00000196510, ENSG00000111665, ENSG0000…	1998	350	16792	1.82496	0.00110032	0.000275231	0.000273385
GO:0008380	RNA splicing	44	1.86678	4.97558e-07	6.30316	ENSG00000133226, ENSG00000140939, ENSG00000092199, ENSG00000108848, ENSG00000198563, ENSG00000114503, ENSG00000152601, ENSG00000138433, ENSG00000158941, ENSG00000075292, ENSG00000060688, ENSG00000169249, ENSG00000163166, ENSG00000138398, ENSG00000139168, ENSG00000119707, ENSG00000183431, ENSG00000164610, ENSG00000106344, ENSG00000168438, ENSG00000184209, ENSG00000112739, ENSG00000135316, ENSG0000…	1998	166	16792	2.22767	0.00237054	0.00047467	0.000471486
GO:0098609	cell-cell adhesion	61	2.58804	1.17974e-06	5.92821	ENSG00000133789, ENSG00000002834, ENSG00000108829, ENSG00000153317, ENSG00000065613, ENSG00000115310, ENSG00000197728, ENSG00000138592, ENSG00000278828, ENSG00000100664, ENSG00000100266, ENSG00000124831, ENSG00000050405, ENSG00000124164, ENSG00000106636, ENSG00000137710, ENSG00000115306, ENSG00000104419, ENSG00000138768, ENSG00000065548, ENSG00000096384, ENSG00000137073, ENSG00000113282, ENSG0000…	1998	271	16792	1.89177	0.00561156	0.000823943	0.000818416
GO:0016925	protein sumoylation	34	1.44251	1.35727e-06	5.86733	ENSG00000131788, ENSG00000092199, ENSG00000072501, ENSG00000112701, ENSG00000131747, ENSG00000173889, ENSG00000154767, ENSG00000198900, ENSG00000112200, ENSG00000168116, ENSG00000172845, ENSG00000119866, ENSG00000079387, ENSG00000163961, ENSG00000012048, ENSG00000033800, ENSG00000140464, ENSG00000128731, ENSG00000153201, ENSG00000067066, ENSG00000105229, ENSG00000163904, ENSG00000132383, ENSG0000…	1998	117	16792	2.44231	0.00645326	0.000823943	0.000818416
GO:0007067	mitotic nuclear division	57	2.41833	1.38188e-06	5.85953	ENSG00000114904, ENSG00000113812, ENSG00000075131, ENSG00000007168, ENSG00000136098, ENSG00000100106, ENSG00000147874, ENSG00000183955, ENSG00000163808, ENSG00000156256, ENSG00000175073, ENSG00000182628, ENSG00000066279, ENSG00000196510, ENSG00000111665, ENSG00000117724, ENSG00000145919, ENSG00000008128, ENSG00000248333, ENSG00000122545, ENSG00000108055, ENSG00000145241, ENSG00000101224, ENSG0000…	1998	248	16792	1.93166	0.00656988	0.000823943	0.000818416
GO:0006397	mRNA processing	45	1.90921	1.73145e-06	5.76159	ENSG00000133226, ENSG00000135828, ENSG00000165819, ENSG00000091542, ENSG00000152601, ENSG00000072062, ENSG00000139746, ENSG00000138433, ENSG00000158941, ENSG00000163166, ENSG00000164252, ENSG00000100722, ENSG00000119707, ENSG00000183431, ENSG00000106344, ENSG00000148843, ENSG00000197381, ENSG00000172062, ENSG00000136709, ENSG00000134748, ENSG00000149187, ENSG00000048740, ENSG00000139218, ENSG0000…	1998	179	16792	2.11284	0.00822502	0.000826727	0.000821181
GO:0006974	cellular response to DNA damage stimulus	50	2.12134	1.73318e-06	5.76116	ENSG00000164808, ENSG00000114904, ENSG00000174013, ENSG00000095787, ENSG00000075131, ENSG00000133302, ENSG00000139842, ENSG00000125885, ENSG00000126215, ENSG00000013573, ENSG00000163961, ENSG00000012048, ENSG00000048028, ENSG00000156256, ENSG00000171791, ENSG00000163806, ENSG00000010072, ENSG00000165392, ENSG00000113522, ENSG00000176208, ENSG00000143624, ENSG00000051341, ENSG00000127311, ENSG0000…	1998	208	16792	2.02029	0.0082332	0.000826727	0.000821181
GO:0018105	peptidyl-serine phosphorylation	35	1.48494	2.3318e-06	5.63231	ENSG00000099308, ENSG00000172071, ENSG00000151292, ENSG00000104205, ENSG00000113712, ENSG00000072062, ENSG00000154229, ENSG00000110422, ENSG00000213923, ENSG00000097046, ENSG00000112062, ENSG00000166333, ENSG00000141551, ENSG00000147133, ENSG00000164715, ENSG00000149311, ENSG00000064393, ENSG00000106799, ENSG00000152332, ENSG00000128881, ENSG00000115825, ENSG00000171791, ENSG00000133275, ENSG0000…	1998	125	16792	2.35323	0.0110611	0.00101115	0.00100437
GO:0006355	regulation of transcription, DNA-templated	237	10.0552	2.61385e-06	5.58272	ENSG00000197372, ENSG00000093167, ENSG00000198464, ENSG00000197013, ENSG00000113658, ENSG00000114744, ENSG00000244687, ENSG00000119760, ENSG00000179943, ENSG00000177888, ENSG00000075292, ENSG00000189079, ENSG00000119403, ENSG00000061337, ENSG00000127946, ENSG00000100105, ENSG00000081189, ENSG00000148400, ENSG00000185278, ENSG00000164576, ENSG00000140365, ENSG00000074657, ENSG00000106799, ENSG0000…	1998	1504	16792	1.32436	0.0123907	0.00103901	0.00103204
GO:0006281	DNA repair	52	2.20619	1.3088e-05	4.88313	ENSG00000104343, ENSG00000198382, ENSG00000072501, ENSG00000113812, ENSG00000133302, ENSG00000154767, ENSG00000133863, ENSG00000168411, ENSG00000085224, ENSG00000126215, ENSG00000149136, ENSG00000013573, ENSG00000012048, ENSG00000048392, ENSG00000048028, ENSG00000198690, ENSG00000077721, ENSG00000114933, ENSG00000010072, ENSG00000132383, ENSG00000165392, ENSG00000113522, ENSG00000157106, ENSG0000…	1998	235	16792	1.8597	0.0605213	0.00480229	0.00477007
GO:0000122	negative regulation of transcription from RNA polymerase II promoter	124	5.26092	1.80881e-05	4.74261	ENSG00000197372, ENSG00000144161, ENSG00000197256, ENSG00000006712, ENSG00000198625, ENSG00000119403, ENSG00000204713, ENSG00000257923, ENSG00000081189, ENSG00000148400, ENSG00000139083, ENSG00000178691, ENSG00000106443, ENSG00000175354, ENSG00000113649, ENSG00000105229, ENSG00000156374, ENSG00000005339, ENSG00000174306, ENSG00000165156, ENSG00000060138, ENSG00000170854, ENSG00000164463, ENSG0000…	1998	720	16792	1.44743	0.0826634	0.00616286	0.00612151
GO:0006303	double-strand break repair via nonhomologous end joining	21	0.890963	2.44935e-05	4.61095	ENSG00000105229, ENSG00000173120, ENSG00000253729, ENSG00000157212, ENSG00000076242, ENSG00000020922, ENSG00000113522, ENSG00000177889, ENSG00000169139, ENSG00000166896, ENSG00000138376, ENSG00000080345, ENSG00000140382, ENSG00000188486, ENSG00000149311, ENSG00000163322, ENSG00000163961, ENSG00000012048, ENSG00000109685, ENSG00000122783, ENSG00000128731	1998	63	16792	2.80147	0.110269	0.00778894	0.00773669
GO:1901796	regulation of signal transduction by p53 class mediator	32	1.35766	3.9514e-05	4.40325	ENSG00000168395, ENSG00000020922, ENSG00000198625, ENSG00000132356, ENSG00000112062, ENSG00000083168, ENSG00000138376, ENSG00000025293, ENSG00000136492, ENSG00000163349, ENSG00000147133, ENSG00000149311, ENSG00000149136, ENSG00000166337, ENSG00000012048, ENSG00000140464, ENSG00000183955, ENSG00000064393, ENSG00000196591, ENSG00000070770, ENSG00000164938, ENSG00000132383, ENSG00000171792, ENSG0000…	1998	124	16792	2.16888	0.171788	0.0117801	0.0117011
GO:0006364	rRNA processing	46	1.95163	9.12145e-05	4.03994	ENSG00000149273, ENSG00000111615, ENSG00000160208, ENSG00000161956, ENSG00000109536, ENSG00000198000, ENSG00000135828, ENSG00000145592, ENSG00000162408, ENSG00000130713, ENSG00000039123, ENSG00000213923, ENSG00000265681, ENSG00000130255, ENSG00000135521, ENSG00000083520, ENSG00000171316, ENSG00000197728, ENSG00000141551, ENSG00000145414, ENSG00000223496, ENSG00000053372, ENSG00000087269, ENSG0000…	1998	214	16792	1.80655	0.352809	0.0255937	0.025422
GO:0000086	G2/M transition of mitotic cell cycle	33	1.40008	0.000121938	3.91386	ENSG00000103995, ENSG00000149474, ENSG00000077157, ENSG00000072062, ENSG00000198668, ENSG00000213923, ENSG00000131023, ENSG00000116127, ENSG00000080824, ENSG00000174799, ENSG00000141551, ENSG00000007168, ENSG00000151849, ENSG00000108100, ENSG00000160299, ENSG00000213066, ENSG00000147874, ENSG00000079805, ENSG00000132688, ENSG00000126001, ENSG00000108953, ENSG00000136861, ENSG00000213639, ENSG0000…	1998	137	16792	2.02442	0.441041	0.0323135	0.0320968
GO:0007062	sister chromatid cohesion	27	1.14552	0.000135606	3.86772	ENSG00000072501, ENSG00000163539, ENSG00000130779, ENSG00000138778, ENSG00000112941, ENSG00000020922, ENSG00000007168, ENSG00000184445, ENSG00000013573, ENSG00000153201, ENSG00000182628, ENSG00000068796, ENSG00000146670, ENSG00000117724, ENSG00000074054, ENSG00000153207, ENSG00000137812, ENSG00000123810, ENSG00000123219, ENSG00000163535, ENSG00000108055, ENSG00000145241, ENSG00000179051, ENSG0000…	1998	103	16792	2.2031	0.476325	0.0340442	0.0338158
GO:0045892	negative regulation of transcription, DNA-templated	88	3.73356	0.000147742	3.83049	ENSG00000105993, ENSG00000108468, ENSG00000144161, ENSG00000177485, ENSG00000110987, ENSG00000137504, ENSG00000139687, ENSG00000138433, ENSG00000083168, ENSG00000276644, ENSG00000140320, ENSG00000118513, ENSG00000168214, ENSG00000006194, ENSG00000100105, ENSG00000078699, ENSG00000148400, ENSG00000124831, ENSG00000100784, ENSG00000084093, ENSG00000012048, ENSG00000183337, ENSG00000183955, ENSG0000…	1998	499	16792	1.48214	0.505785	0.0352366	0.0350002
GO:0006468	protein phosphorylation	81	3.43657	0.000218591	3.66037	ENSG00000134318, ENSG00000114904, ENSG00000172071, ENSG00000113658, ENSG00000151414, ENSG00000072062, ENSG00000110422, ENSG00000134070, ENSG00000136098, ENSG00000161021, ENSG00000100784, ENSG00000106683, ENSG00000103653, ENSG00000082074, ENSG00000106799, ENSG00000134602, ENSG00000115825, ENSG00000110931, ENSG00000070770, ENSG00000133275, ENSG00000157540, ENSG00000008128, ENSG00000118246, ENSG0000…	1998	456	16792	1.49289	0.647531	0.0496514	0.0493183
GO:0007059	chromosome segregation	20	0.848536	0.000260062	3.58492	ENSG00000149273, ENSG00000198382, ENSG00000182628, ENSG00000067048, ENSG00000131747, ENSG00000136169, ENSG00000138778, ENSG00000136861, ENSG00000117724, ENSG00000165480, ENSG00000198900, ENSG00000130695, ENSG00000113580, ENSG00000116273, ENSG00000136098, ENSG00000145241, ENSG00000144021, ENSG00000012048, ENSG00000149503, ENSG00000123485	1998	68	16792	2.47188	0.710806	0.0563862	0.0560079
GO:0043966	histone H3 acetylation	15	0.636402	0.000295833	3.52895	ENSG00000156650, ENSG00000139618, ENSG00000149474, ENSG00000168395, ENSG00000117505, ENSG00000077684, ENSG00000119760, ENSG00000083168, ENSG00000096070, ENSG00000166337, ENSG00000163872, ENSG00000276234, ENSG00000148229, ENSG00000221926, ENSG00000108773	1998	43	16792	2.93177	0.756182	0.0613532	0.0609416
GO:0006396	RNA processing	25	1.06067	0.0003336	3.47677	ENSG00000188917, ENSG00000108406, ENSG00000174953, ENSG00000060688, ENSG00000164252, ENSG00000197381, ENSG00000105323, ENSG00000150990, ENSG00000153187, ENSG00000135316, ENSG00000096746, ENSG00000133858, ENSG00000048740, ENSG00000105705, ENSG00000131051, ENSG00000174720, ENSG00000061936, ENSG00000151746, ENSG00000152795, ENSG00000138385, ENSG00000064607, ENSG00000100836, ENSG00000100697, ENSG0000…	1998	97	16792	2.16608	0.796387	0.0663029	0.0658581
GO:0031023	microtubule organizing center organization	7	0.296988	0.000384978	3.41456	ENSG00000135968, ENSG00000007168, ENSG00000163539, ENSG00000163811, ENSG00000136861, ENSG00000167716, ENSG00000074054	1998	10	16792	5.88308	0.840658	0.0734539	0.0729611
GO:0008360	regulation of cell shape	32	1.35766	0.0004226	3.37407	ENSG00000198121, ENSG00000131504, ENSG00000151292, ENSG00000147010, ENSG00000113712, ENSG00000213923, ENSG00000097046, ENSG00000158985, ENSG00000157654, ENSG00000196504, ENSG00000176438, ENSG00000179604, ENSG00000141551, ENSG00000120899, ENSG00000100345, ENSG00000092820, ENSG00000160255, ENSG00000146247, ENSG00000128578, ENSG00000185658, ENSG00000128585, ENSG00000128881, ENSG00000071127, ENSG0000…	1998	140	16792	1.92101	0.866843	0.0752213	0.0747167
GO:0045893	positive regulation of transcription, DNA-templated	88	3.73356	0.000425781	3.37081	ENSG00000181104, ENSG00000114904, ENSG00000177565, ENSG00000184939, ENSG00000068323, ENSG00000166949, ENSG00000065970, ENSG00000095787, ENSG00000113658, ENSG00000244687, ENSG00000139687, ENSG00000083168, ENSG00000164134, ENSG00000118513, ENSG00000081189, ENSG00000148400, ENSG00000084093, ENSG00000012048, ENSG00000125686, ENSG00000160973, ENSG00000127870, ENSG00000106799, ENSG00000196591, ENSG0000…	1998	515	16792	1.43609	0.868849	0.0752213	0.0747167
GO:0043161	proteasome-mediated ubiquitin-dependent protein catabolic process	42	1.78193	0.000444569	3.35206	ENSG00000152242, ENSG00000104343, ENSG00000185627, ENSG00000177565, ENSG00000092871, ENSG00000174013, ENSG00000118193, ENSG00000113712, ENSG00000198742, ENSG00000131263, ENSG00000179526, ENSG00000134852, ENSG00000004897, ENSG00000130177, ENSG00000240065, ENSG00000139842, ENSG00000078140, ENSG00000100902, ENSG00000185453, ENSG00000159352, ENSG00000157450, ENSG00000100764, ENSG00000011275, ENSG0000…	1998	203	16792	1.73884	0.880096	0.0757355	0.0752274
GO:0007050	cell cycle arrest	32	1.35766	0.000481131	3.31774	ENSG00000105810, ENSG00000123080, ENSG00000166949, ENSG00000116688, ENSG00000139687, ENSG00000132356, ENSG00000139842, ENSG00000166333, ENSG00000005483, ENSG00000184481, ENSG00000138376, ENSG00000102547, ENSG00000149311, ENSG00000140464, ENSG00000071246, ENSG00000106799, ENSG00000152332, ENSG00000136603, ENSG00000105329, ENSG00000164938, ENSG00000167393, ENSG00000169032, ENSG00000178607, ENSG0000…	1998	141	16792	1.90738	0.899294	0.0791377	0.0786068
GO:0006406	mRNA export from nucleus	25	1.06067	0.000539275	3.26819	ENSG00000133226, ENSG00000198563, ENSG00000164609, ENSG00000091542, ENSG00000114503, ENSG00000134597, ENSG00000145216, ENSG00000168872, ENSG00000188529, ENSG00000168438, ENSG00000151461, ENSG00000153201, ENSG00000125351, ENSG00000198952, ENSG00000196313, ENSG00000116754, ENSG00000116698, ENSG00000151247, ENSG00000157106, ENSG00000058673, ENSG00000139496, ENSG00000124789, ENSG00000063244, ENSG0000…	1998	100	16792	2.1011	0.923696	0.0857447	0.0851695
GO:0007004	telomere maintenance via telomerase	9	0.381841	0.000572685	3.24208	ENSG00000035928, ENSG00000164362, ENSG00000149115, ENSG00000149311, ENSG00000020922, ENSG00000113522, ENSG00000147601, ENSG00000116698, ENSG00000141499	1998	18	16792	4.2022	0.934943	0.0881196	0.0875284
GO:1903364	positive regulation of cellular protein catabolic process	7	0.296988	0.000761666	3.11824	ENSG00000147065, ENSG00000069329, ENSG00000137710, ENSG00000183255, ENSG00000092820, ENSG00000184675, ENSG00000118564	1998	11	16792	5.34826	0.973604	0.113536	0.112774
GO:0043488	regulation of mRNA stability	25	1.06067	0.000847969	3.07162	ENSG00000185627, ENSG00000066044, ENSG00000135828, ENSG00000130713, ENSG00000172795, ENSG00000154229, ENSG00000114127, ENSG00000240065, ENSG00000083520, ENSG00000223496, ENSG00000100902, ENSG00000100722, ENSG00000159352, ENSG00000100764, ENSG00000272886, ENSG00000055917, ENSG00000204264, ENSG00000041357, ENSG00000135870, ENSG00000119335, ENSG00000140350, ENSG00000083312, ENSG00000108671, ENSG0000…	1998	103	16792	2.0399	0.982517	0.116746	0.115963
GO:0030330	DNA damage response, signal transduction by p53 class mediator	8	0.339415	0.000898552	3.04646	ENSG00000118689, ENSG00000103194, ENSG00000085224, ENSG00000165891, ENSG00000196586, ENSG00000104419, ENSG00000157212, ENSG00000198625	1998	15	16792	4.48235	0.986268	0.116746	0.115963
GO:0000729	DNA double-strand break processing	8	0.339415	0.000898552	3.04646	ENSG00000169139, ENSG00000138376, ENSG00000149311, ENSG00000020922, ENSG00000113522, ENSG00000012048, ENSG00000163104, ENSG00000177889	1998	15	16792	4.48235	0.986268	0.116746	0.115963
GO:0006301	postreplication repair	8	0.339415	0.000898552	3.04646	ENSG00000169139, ENSG00000136709, ENSG00000124208, ENSG00000077721, ENSG00000071794, ENSG00000244687, ENSG00000012048, ENSG00000177889	1998	15	16792	4.48235	0.986268	0.116746	0.115963
GO:0006661	phosphatidylinositol biosynthetic process	17	0.721256	0.000905579	3.04307	ENSG00000103043, ENSG00000166908, ENSG00000141506, ENSG00000148384, ENSG00000211456, ENSG00000038210, ENSG00000078269, ENSG00000171100, ENSG00000134287, ENSG00000139505, ENSG00000171862, ENSG00000198825, ENSG00000115020, ENSG00000063601, ENSG00000011405, ENSG00000150867, ENSG00000165458	1998	58	16792	2.46336	0.986721	0.116746	0.115963
GO:0002011	morphogenesis of an epithelial sheet	6	0.254561	0.000971476	3.01257	ENSG00000165322, ENSG00000112658, ENSG00000148943, ENSG00000072415, ENSG00000173402, ENSG00000101384	1998	8	16792	6.3033	0.990305	0.121946	0.121128
GO:0006457	protein folding	37	1.56979	0.00115373	2.93789	ENSG00000105993, ENSG00000127022, ENSG00000240344, ENSG00000139921, ENSG00000197930, ENSG00000113013, ENSG00000080824, ENSG00000168259, ENSG00000165661, ENSG00000138398, ENSG00000167004, ENSG00000124659, ENSG00000100348, ENSG00000125863, ENSG00000140403, ENSG00000141556, ENSG00000166479, ENSG00000110917, ENSG00000153201, ENSG00000070770, ENSG00000090520, ENSG00000114857, ENSG00000170584, ENSG0000…	1998	180	16792	1.72757	0.99594	0.141111	0.140164
GO:0008333	endosome to lysosome transport	13	0.551549	0.0013853	2.85846	ENSG00000051009, ENSG00000100281, ENSG00000006715, ENSG00000105339, ENSG00000075785, ENSG00000134243, ENSG00000171100, ENSG00000169252, ENSG00000168172, ENSG00000095066, ENSG00000143878, ENSG00000136021, ENSG00000126775	1998	39	16792	2.80147	0.998656	0.165197	0.164088
GO:0016567	protein ubiquitination	63	2.67289	0.00155706	2.80769	ENSG00000174013, ENSG00000174010, ENSG00000176595, ENSG00000152944, ENSG00000198742, ENSG00000154447, ENSG00000136536, ENSG00000198625, ENSG00000159459, ENSG00000177889, ENSG00000166233, ENSG00000168411, ENSG00000120833, ENSG00000163162, ENSG00000013374, ENSG00000145332, ENSG00000163961, ENSG00000012048, ENSG00000125686, ENSG00000130487, ENSG00000196151, ENSG00000198373, ENSG00000175073, ENSG0000…	1998	359	16792	1.47487	0.999409	0.180562	0.17935
GO:0031124	mRNA 3'-end processing	15	0.636402	0.00158985	2.79864	ENSG00000133226, ENSG00000125351, ENSG00000198563, ENSG00000164609, ENSG00000114503, ENSG00000116754, ENSG00000090060, ENSG00000145216, ENSG00000058673, ENSG00000100836, ENSG00000165494, ENSG00000063244, ENSG00000125676, ENSG00000149532, ENSG00000168438	1998	50	16792	2.52132	0.999494	0.180562	0.17935
GO:0000209	protein polyubiquitination	37	1.56979	0.00172795	2.76247	ENSG00000152242, ENSG00000185627, ENSG00000133606, ENSG00000071794, ENSG00000198742, ENSG00000110344, ENSG00000067955, ENSG00000114423, ENSG00000131263, ENSG00000244687, ENSG00000240065, ENSG00000173821, ENSG00000166233, ENSG00000145416, ENSG00000100902, ENSG00000056586, ENSG00000159352, ENSG00000157450, ENSG00000100764, ENSG00000147133, ENSG00000141279, ENSG00000134900, ENSG00000171791, ENSG0000…	1998	184	16792	1.69002	0.999739	0.191682	0.190396
GO:0016032	viral process	54	2.29105	0.00185081	2.73264	ENSG00000175582, ENSG00000170653, ENSG00000003402, ENSG00000139687, ENSG00000198900, ENSG00000139842, ENSG00000114062, ENSG00000087088, ENSG00000011275, ENSG00000013573, ENSG00000126214, ENSG00000103043, ENSG00000135899, ENSG00000145041, ENSG00000204264, ENSG00000041357, ENSG00000196313, ENSG00000113522, ENSG00000005339, ENSG00000151247, ENSG00000132466, ENSG00000119335, ENSG00000139496, ENSG0000…	1998	299	16792	1.51785	0.999855	0.200645	0.199299
GO:0006977	DNA damage response, signal transduction by p53 class mediator resulting in cell cycle arrest	17	0.721256	0.00195458	2.70895	ENSG00000198176, ENSG00000198791, ENSG00000177595, ENSG00000138767, ENSG00000116017, ENSG00000113300, ENSG00000198625, ENSG00000080802, ENSG00000165891, ENSG00000151849, ENSG00000149115, ENSG00000087088, ENSG00000103479, ENSG00000132819, ENSG00000125107, ENSG00000149311, ENSG00000140464	1998	62	16792	2.30443	0.999911	0.207185	0.205795
GO:2000114	regulation of establishment of cell polarity	8	0.339415	0.0021897	2.65962	ENSG00000134318, ENSG00000138182, ENSG00000120899, ENSG00000164327, ENSG00000067900, ENSG00000066777, ENSG00000204628, ENSG00000127314	1998	17	16792	3.95501	0.999971	0.214176	0.212739
GO:0006376	mRNA splice site selection	8	0.339415	0.0021897	2.65962	ENSG00000140939, ENSG00000108848, ENSG00000149187, ENSG00000083896, ENSG00000048740, ENSG00000269955, ENSG00000188529, ENSG00000146963	1998	17	16792	3.95501	0.999971	0.214176	0.212739
GO:0045944	positive regulation of transcription from RNA polymerase II promoter	147	6.23674	0.00219925	2.65773	ENSG00000006712, ENSG00000108509, ENSG00000067955, ENSG00000079387, ENSG00000114062, ENSG00000081189, ENSG00000078699, ENSG00000148400, ENSG00000139083, ENSG00000183258, ENSG00000141456, ENSG00000012048, ENSG00000025800, ENSG00000198176, ENSG00000156256, ENSG00000156650, ENSG00000115548, ENSG00000155846, ENSG00000005339, ENSG00000123908, ENSG00000204304, ENSG00000118689, ENSG00000119778, ENSG0000…	1998	981	16792	1.25938	0.999973	0.214176	0.212739
GO:0000278	mitotic cell cycle	13	0.551549	0.00223291	2.65113	ENSG00000114904, ENSG00000198176, ENSG00000126001, ENSG00000134602, ENSG00000138778, ENSG00000117724, ENSG00000119397, ENSG00000133895, ENSG00000136159, ENSG00000118513, ENSG00000116273, ENSG00000145241, ENSG00000101224	1998	41	16792	2.66481	0.999977	0.214176	0.212739
GO:0006338	chromatin remodeling	21	0.890963	0.00226523	2.64489	ENSG00000163939, ENSG00000196591, ENSG00000173473, ENSG00000073584, ENSG00000113812, ENSG00000080503, ENSG00000117713, ENSG00000198604, ENSG00000139687, ENSG00000198900, ENSG00000048649, ENSG00000171316, ENSG00000118513, ENSG00000085224, ENSG00000126804, ENSG00000162601, ENSG00000141867, ENSG00000276234, ENSG00000163104, ENSG00000124795, ENSG00000108773	1998	86	16792	2.05224	0.99998	0.214176	0.212739
GO:0034453	microtubule anchoring	7	0.296988	0.00228993	2.64018	ENSG00000135968, ENSG00000163539, ENSG00000135837, ENSG00000074054, ENSG00000142655, ENSG00000213066, ENSG00000173402	1998	13	16792	4.52545	0.999982	0.214176	0.212739
GO:0002223	stimulatory C-type lectin receptor signaling pathway	24	1.01824	0.00256056	2.59167	ENSG00000157625, ENSG00000185627, ENSG00000172175, ENSG00000133703, ENSG00000204264, ENSG00000041357, ENSG00000076662, ENSG00000072062, ENSG00000244687, ENSG00000005339, ENSG00000240065, ENSG00000177889, ENSG00000100902, ENSG00000124208, ENSG00000159352, ENSG00000108671, ENSG00000131508, ENSG00000100764, ENSG00000100324, ENSG00000163636, ENSG00000100784, ENSG00000142875, ENSG00000055208, ENSG0000…	1998	105	16792	1.92101	0.999995	0.234882	0.233306
GO:0070534	protein K63-linked ubiquitination	12	0.509122	0.00294115	2.53148	ENSG00000255073, ENSG00000198373, ENSG00000069869, ENSG00000244687, ENSG00000177889, ENSG00000169139, ENSG00000204713, ENSG00000265491, ENSG00000169871, ENSG00000124208, ENSG00000186660, ENSG00000078747, ENSG00000163961	1998	37	16792	2.72575	0.999999	0.264704	0.262928
GO:0006607	NLS-bearing protein import into nucleus	9	0.381841	0.00371946	2.42952	ENSG00000025800, ENSG00000065150, ENSG00000153201, ENSG00000108424, ENSG00000186432, ENSG00000083312, ENSG00000114423, ENSG00000082074, ENSG00000173402	1998	23	16792	3.28868	1	0.328552	0.326348
GO:0032508	DNA duplex unwinding	13	0.551549	0.004255	2.3711	ENSG00000160957, ENSG00000145907, ENSG00000165392, ENSG00000020922, ENSG00000111642, ENSG00000113522, ENSG00000170004, ENSG00000100888, ENSG00000085224, ENSG00000136492, ENSG00000101003, ENSG00000013573, ENSG00000127311	1998	44	16792	2.48312	1	0.369024	0.366549
GO:0007223	Wnt signaling pathway, calcium modulating pathway	12	0.509122	0.00461205	2.33611	ENSG00000090905, ENSG00000138814, ENSG00000149782, ENSG00000104290, ENSG00000078687, ENSG00000078369, ENSG00000198668, ENSG00000100354, ENSG00000131196, ENSG00000221823, ENSG00000092847, ENSG00000123908	1998	39	16792	2.58597	1	0.389847	0.387232
GO:0006260	DNA replication	31	1.31523	0.00469816	2.32807	ENSG00000198000, ENSG00000077514, ENSG00000141905, ENSG00000073111, ENSG00000168395, ENSG00000198646, ENSG00000075131, ENSG00000020922, ENSG00000097046, ENSG00000198900, ENSG00000138376, ENSG00000136492, ENSG00000125885, ENSG00000149311, ENSG00000149136, ENSG00000148229, ENSG00000012048, ENSG00000160957, ENSG00000164815, ENSG00000035928, ENSG00000132383, ENSG00000171792, ENSG00000111445, ENSG0000…	1998	155	16792	1.68088	1	0.389847	0.387232
GO:0006357	regulation of transcription from RNA polymerase II promoter	72	3.05473	0.00475946	2.32244	ENSG00000166949, ENSG00000179981, ENSG00000152944, ENSG00000108509, ENSG00000067955, ENSG00000139687, ENSG00000138433, ENSG00000261221, ENSG00000140044, ENSG00000112282, ENSG00000165185, ENSG00000257923, ENSG00000136492, ENSG00000146463, ENSG00000124831, ENSG00000123066, ENSG00000012048, ENSG00000124795, ENSG00000198176, ENSG00000156256, ENSG00000170581, ENSG00000134324, ENSG00000177853, ENSG0000…	1998	441	16792	1.37215	1	0.389847	0.387232
GO:0050821	protein stabilization	28	1.18795	0.00497043	2.30361	ENSG00000166949, ENSG00000115977, ENSG00000107937, ENSG00000117758, ENSG00000077254, ENSG00000171862, ENSG00000198625, ENSG00000172534, ENSG00000080824, ENSG00000164134, ENSG00000168434, ENSG00000127946, ENSG00000161202, ENSG00000147133, ENSG00000147533, ENSG00000140464, ENSG00000118260, ENSG00000179218, ENSG00000172766, ENSG00000096384, ENSG00000069849, ENSG00000196924, ENSG00000058056, ENSG0000…	1998	136	16792	1.73032	1	0.389847	0.387232
GO:0007173	epidermal growth factor receptor signaling pathway	15	0.636402	0.00497553	2.30316	ENSG00000151694, ENSG00000133703, ENSG00000124181, ENSG00000105329, ENSG00000112851, ENSG00000076641, ENSG00000114423, ENSG00000110395, ENSG00000011405, ENSG00000120899, ENSG00000100784, ENSG00000179295, ENSG00000103653, ENSG00000050820, ENSG00000140992	1998	56	16792	2.25118	1	0.389847	0.387232
GO:0046856	phosphatidylinositol dephosphorylation	9	0.381841	0.00500584	2.30052	ENSG00000063601, ENSG00000211456, ENSG00000148384, ENSG00000171100, ENSG00000078269, ENSG00000139505, ENSG00000171862, ENSG00000165458, ENSG00000198825	1998	24	16792	3.15165	1	0.389847	0.387232
GO:0000289	nuclear-transcribed mRNA poly(A) tail shortening	10	0.424268	0.00506719	2.29523	ENSG00000198791, ENSG00000063046, ENSG00000149115, ENSG00000138767, ENSG00000076242, ENSG00000135473, ENSG00000125107, ENSG00000113300, ENSG00000151247, ENSG00000080802	1998	29	16792	2.89807	1	0.389847	0.387232
GO:0035194	posttranscriptional gene silencing by RNA	5	0.212134	0.00518323	2.2854	ENSG00000090905, ENSG00000078687, ENSG00000100354, ENSG00000092847, ENSG00000123908	1998	7	16792	6.00315	1	0.392445	0.389812
GO:0043486	histone exchange	6	0.254561	0.00588912	2.22995	ENSG00000143401, ENSG00000140350, ENSG00000136938, ENSG00000132780, ENSG00000179119, ENSG00000163159	1998	11	16792	4.58422	1	0.438923	0.435979
GO:0000077	DNA damage checkpoint	10	0.424268	0.00648844	2.18786	ENSG00000112062, ENSG00000048028, ENSG00000188486, ENSG00000136492, ENSG00000171792, ENSG00000092853, ENSG00000179295, ENSG00000149311, ENSG00000134852, ENSG00000143155	1998	30	16792	2.80147	1	0.476151	0.472957
GO:0017148	negative regulation of translation	15	0.636402	0.0069326	2.1591	ENSG00000136628, ENSG00000149273, ENSG00000172071, ENSG00000135316, ENSG00000149187, ENSG00000114416, ENSG00000204120, ENSG00000135387, ENSG00000179218, ENSG00000151247, ENSG00000136381, ENSG00000136231, ENSG00000125107, ENSG00000185129, ENSG00000204628	1998	58	16792	2.17355	1	0.490507	0.487217
GO:0006890	retrograde vesicle-mediated transport, Golgi to ER	19	0.806109	0.00695866	2.15747	ENSG00000175582, ENSG00000163808, ENSG00000198382, ENSG00000068796, ENSG00000197386, ENSG00000177692, ENSG00000134287, ENSG00000138778, ENSG00000138069, ENSG00000166377, ENSG00000084731, ENSG00000170348, ENSG00000251201, ENSG00000168434, ENSG00000086598, ENSG00000180957, ENSG00000161800, ENSG00000073969, ENSG00000126214	1998	82	16792	1.94736	1	0.490507	0.487217
GO:0006369	termination of RNA polymerase II transcription	16	0.678829	0.00706591	2.15083	ENSG00000133226, ENSG00000125351, ENSG00000198563, ENSG00000164609, ENSG00000114503, ENSG00000116754, ENSG00000116830, ENSG00000090060, ENSG00000145216, ENSG00000058673, ENSG00000100836, ENSG00000165494, ENSG00000063244, ENSG00000125676, ENSG00000149532, ENSG00000168438	1998	64	16792	2.1011	1	0.490507	0.487217
GO:0051092	positive regulation of NF-kappaB transcription factor activity	27	1.14552	0.00709539	2.14902	ENSG00000196083, ENSG00000172175, ENSG00000133703, ENSG00000244687, ENSG00000132274, ENSG00000134852, ENSG00000003402, ENSG00000177889, ENSG00000134070, ENSG00000276600, ENSG00000100902, ENSG00000131080, ENSG00000100324, ENSG00000160255, ENSG00000124831, ENSG00000100784, ENSG00000157625, ENSG00000136869, ENSG00000105329, ENSG00000177595, ENSG00000147649, ENSG00000168961, ENSG00000010671, ENSG0000…	1998	133	16792	1.70616	1	0.490507	0.487217
GO:0042787	protein ubiquitination involved in ubiquitin-dependent protein catabolic process	30	1.2728	0.00725636	2.13928	ENSG00000152242, ENSG00000135506, ENSG00000092871, ENSG00000174013, ENSG00000174010, ENSG00000198742, ENSG00000151893, ENSG00000004897, ENSG00000130177, ENSG00000139842, ENSG00000166233, ENSG00000185453, ENSG00000157450, ENSG00000147133, ENSG00000145332, ENSG00000128731, ENSG00000163743, ENSG00000153561, ENSG00000198373, ENSG00000092148, ENSG00000196510, ENSG00000069869, ENSG00000159202, ENSG0000…	1998	153	16792	1.64792	1	0.494469	0.491152
GO:0070936	protein K48-linked ubiquitination	13	0.551549	0.00753246	2.12306	ENSG00000127870, ENSG00000092871, ENSG00000077721, ENSG00000078140, ENSG00000186591, ENSG00000265491, ENSG00000114062, ENSG00000182670, ENSG00000131508, ENSG00000145495, ENSG00000011275, ENSG00000078747, ENSG00000184787	1998	47	16792	2.32462	1	0.506054	0.502659
GO:0035855	megakaryocyte development	7	0.296988	0.00779959	2.10793	ENSG00000158195, ENSG00000150867, ENSG00000111679, ENSG00000112658, ENSG00000179295, ENSG00000136754, ENSG00000125686	1998	16	16792	3.67693	1	0.516723	0.513256
GO:0000082	G1/S transition of mitotic cell cycle	22	0.93339	0.0081002	2.0915	ENSG00000183856, ENSG00000138814, ENSG00000105810, ENSG00000123080, ENSG00000150093, ENSG00000164815, ENSG00000073111, ENSG00000146670, ENSG00000163806, ENSG00000132383, ENSG00000131023, ENSG00000097046, ENSG00000139687, ENSG00000151893, ENSG00000151247, ENSG00000139842, ENSG00000175305, ENSG00000060982, ENSG00000125885, ENSG00000122641, ENSG00000033800, ENSG00000128059	1998	102	16792	1.81271	1	0.521306	0.517809
GO:0043123	positive regulation of I-kappaB kinase/NF-kappaB signaling	31	1.31523	0.00817884	2.08731	ENSG00000181104, ENSG00000126353, ENSG00000198121, ENSG00000172175, ENSG00000111711, ENSG00000243414, ENSG00000198001, ENSG00000162924, ENSG00000104529, ENSG00000114346, ENSG00000244687, ENSG00000132274, ENSG00000179526, ENSG00000003402, ENSG00000003400, ENSG00000177889, ENSG00000251201, ENSG00000131080, ENSG00000186908, ENSG00000168040, ENSG00000132466, ENSG00000196924, ENSG00000147649, ENSG0000…	1998	161	16792	1.61824	1	0.521306	0.517809
GO:1990090	cellular response to nerve growth factor stimulus	10	0.424268	0.00819664	2.08636	ENSG00000141551, ENSG00000118689, ENSG00000100139, ENSG00000118260, ENSG00000107263, ENSG00000213923, ENSG00000134313, ENSG00000110395, ENSG00000114331, ENSG00000108773	1998	31	16792	2.7111	1	0.521306	0.517809
GO:0009411	response to UV	12	0.509122	0.00843696	2.07381	ENSG00000225830, ENSG00000165806, ENSG00000129197, ENSG00000077721, ENSG00000076984, ENSG00000116747, ENSG00000010072, ENSG00000075131, ENSG00000133895, ENSG00000158941, ENSG00000132356, ENSG00000140464	1998	42	16792	2.40126	1	0.52953	0.525978
GO:0000732	strand displacement	9	0.381841	0.0085659	2.06723	ENSG00000138376, ENSG00000139618, ENSG00000136492, ENSG00000126215, ENSG00000165392, ENSG00000149311, ENSG00000020922, ENSG00000113522, ENSG00000012048	1998	26	16792	2.90922	1	0.530641	0.527081
GO:0006511	ubiquitin-dependent protein catabolic process	34	1.44251	0.00870981	2.05999	ENSG00000185627, ENSG00000103194, ENSG00000092871, ENSG00000110344, ENSG00000156804, ENSG00000131263, ENSG00000077254, ENSG00000139842, ENSG00000173821, ENSG00000177889, ENSG00000078140, ENSG00000166233, ENSG00000100902, ENSG00000114062, ENSG00000185453, ENSG00000138592, ENSG00000159352, ENSG00000013374, ENSG00000163961, ENSG00000184787, ENSG00000127870, ENSG00000048028, ENSG00000156256, ENSG0000…	1998	182	16792	1.57005	1	0.532638	0.529065
GO:2000643	positive regulation of early endosome to late endosome transport	5	0.212134	0.00939499	2.0271	ENSG00000080371, ENSG00000147065, ENSG00000076201, ENSG00000137710, ENSG00000092820	1998	8	16792	5.25275	1	0.544485	0.540832
GO:0016926	protein desumoylation	5	0.212134	0.00939499	2.0271	ENSG00000161956, ENSG00000079387, ENSG00000112701, ENSG00000077458, ENSG00000163904	1998	8	16792	5.25275	1	0.544485	0.540832
GO:0030433	ER-associated ubiquitin-dependent protein catabolic process	15	0.636402	0.00945832	2.02419	ENSG00000135506, ENSG00000107566, ENSG00000134109, ENSG00000110344, ENSG00000077232, ENSG00000050130, ENSG00000145495, ENSG00000100764, ENSG00000163516, ENSG00000163527, ENSG00000104691, ENSG00000108588, ENSG00000184787, ENSG00000100350, ENSG00000144224	1998	60	16792	2.1011	1	0.544485	0.540832
GO:0007249	I-kappaB kinase/NF-kappaB signaling	15	0.636402	0.00945832	2.02419	ENSG00000134318, ENSG00000157625, ENSG00000136869, ENSG00000197372, ENSG00000243414, ENSG00000162924, ENSG00000067900, ENSG00000179526, ENSG00000134070, ENSG00000167984, ENSG00000251201, ENSG00000010671, ENSG00000146243, ENSG00000100324, ENSG00000055208	1998	60	16792	2.1011	1	0.544485	0.540832
GO:0002244	hematopoietic progenitor cell differentiation	16	0.678829	0.00947427	2.02345	ENSG00000155189, ENSG00000069424, ENSG00000160818, ENSG00000105329, ENSG00000111679, ENSG00000131747, ENSG00000115956, ENSG00000105738, ENSG00000081237, ENSG00000138642, ENSG00000117523, ENSG00000066827, ENSG00000142046, ENSG00000179041, ENSG00000084093, ENSG00000122641	1998	66	16792	2.03743	1	0.544485	0.540832
GO:0010212	response to ionizing radiation	13	0.551549	0.0106383	1.97313	ENSG00000048028, ENSG00000157212, ENSG00000173559, ENSG00000168411, ENSG00000143624, ENSG00000143207, ENSG00000188486, ENSG00000126215, ENSG00000149311, ENSG00000163322, ENSG00000148218, ENSG00000163961, ENSG00000012048	1998	49	16792	2.22974	1	0.599217	0.595197
GO:0050775	positive regulation of dendrite morphogenesis	7	0.296988	0.0108595	1.96419	ENSG00000166333, ENSG00000080371, ENSG00000257923, ENSG00000008086, ENSG00000135387, ENSG00000105186, ENSG00000184402	1998	17	16792	3.46064	1	0.599217	0.595197
GO:0033077	T cell differentiation in thymus	9	0.381841	0.0109291	1.96142	ENSG00000151694, ENSG00000105810, ENSG00000171791, ENSG00000126804, ENSG00000168040, ENSG00000253729, ENSG00000103423, ENSG00000101882, ENSG00000166710	1998	27	16792	2.80147	1	0.599217	0.595197
GO:0043029	T cell homeostasis	9	0.381841	0.0109291	1.96142	ENSG00000125735, ENSG00000171791, ENSG00000144161, ENSG00000105329, ENSG00000056586, ENSG00000153094, ENSG00000135870, ENSG00000168040, ENSG00000141873	1998	27	16792	2.80147	1	0.599217	0.595197
GO:0046329	negative regulation of JNK cascade	8	0.339415	0.0112603	1.94845	ENSG00000186063, ENSG00000132522, ENSG00000197372, ENSG00000007168, ENSG00000078747, ENSG00000133895, ENSG00000141027, ENSG00000108861	1998	22	16792	3.05615	1	0.602919	0.598874
GO:0006509	membrane protein ectodomain proteolysis	8	0.339415	0.0112603	1.94845	ENSG00000151694, ENSG00000100345, ENSG00000205155, ENSG00000137845, ENSG00000168615, ENSG00000186318, ENSG00000005206, ENSG00000173402	1998	22	16792	3.05615	1	0.602919	0.598874
GO:0018107	peptidyl-threonine phosphorylation	11	0.466695	0.0113758	1.94402	ENSG00000060237, ENSG00000064393, ENSG00000106799, ENSG00000171791, ENSG00000157540, ENSG00000072518, ENSG00000072062, ENSG00000147133, ENSG00000110422, ENSG00000164715, ENSG00000140992	1998	38	16792	2.43285	1	0.602919	0.598874
GO:0010501	RNA secondary structure unwinding	12	0.509122	0.012111	1.91682	ENSG00000145833, ENSG00000198231, ENSG00000178105, ENSG00000124228, ENSG00000198563, ENSG00000168872, ENSG00000067048, ENSG00000165732, ENSG00000183258, ENSG00000092847, ENSG00000123908, ENSG00000174953	1998	44	16792	2.29211	1	0.626593	0.62239
GO:0000724	double-strand break repair via homologous recombination	17	0.721256	0.0122175	1.91302	ENSG00000164808, ENSG00000198690, ENSG00000069275, ENSG00000139618, ENSG00000132207, ENSG00000160949, ENSG00000132383, ENSG00000020922, ENSG00000113522, ENSG00000173559, ENSG00000177889, ENSG00000188486, ENSG00000051341, ENSG00000125885, ENSG00000126215, ENSG00000149311, ENSG00000012048	1998	74	16792	1.93074	1	0.626593	0.62239
GO:0007030	Golgi organization	17	0.721256	0.0122175	1.91302	ENSG00000178950, ENSG00000163539, ENSG00000197386, ENSG00000177692, ENSG00000113712, ENSG00000173230, ENSG00000138768, ENSG00000074054, ENSG00000066777, ENSG00000138069, ENSG00000119787, ENSG00000166685, ENSG00000141551, ENSG00000170348, ENSG00000168434, ENSG00000086598, ENSG00000184743	1998	74	16792	1.93074	1	0.626593	0.62239
GO:0019827	stem cell population maintenance	13	0.551549	0.0125214	1.90235	ENSG00000072501, ENSG00000137815, ENSG00000165819, ENSG00000152944, ENSG00000006712, ENSG00000151247, ENSG00000119403, ENSG00000144535, ENSG00000080345, ENSG00000108055, ENSG00000143033, ENSG00000184634, ENSG00000101882	1998	50	16792	2.18515	1	0.626593	0.62239
GO:0006897	endocytosis	27	1.14552	0.0125303	1.90204	ENSG00000151292, ENSG00000175344, ENSG00000147010, ENSG00000115977, ENSG00000196586, ENSG00000213923, ENSG00000077254, ENSG00000095066, ENSG00000166377, ENSG00000141551, ENSG00000147650, ENSG00000102189, ENSG00000079805, ENSG00000075785, ENSG00000198399, ENSG00000134243, ENSG00000133275, ENSG00000171475, ENSG00000138069, ENSG00000113282, ENSG00000011405, ENSG00000100139, ENSG00000148158, ENSG0000…	1998	139	16792	1.63251	1	0.626593	0.62239
GO:0051402	neuron apoptotic process	10	0.424268	0.0126107	1.89926	ENSG00000091592, ENSG00000145390, ENSG00000165806, ENSG00000120868, ENSG00000171791, ENSG00000087088, ENSG00000111676, ENSG00000149311, ENSG00000139687, ENSG00000176171	1998	33	16792	2.54679	1	0.626593	0.62239
GO:0016055	Wnt signaling pathway	34	1.44251	0.0129241	1.8886	ENSG00000198561, ENSG00000093167, ENSG00000100281, ENSG00000151292, ENSG00000106723, ENSG00000113712, ENSG00000177485, ENSG00000006712, ENSG00000213923, ENSG00000158941, ENSG00000132356, ENSG00000141551, ENSG00000161202, ENSG00000072518, ENSG00000108100, ENSG00000015133, ENSG00000127603, ENSG00000163785, ENSG00000115808, ENSG00000106635, ENSG00000137815, ENSG00000105229, ENSG00000163904, ENSG0000…	1998	187	16792	1.52807	1	0.635546	0.631283
GO:0006886	intracellular protein transport	41	1.7395	0.013065	1.88389	ENSG00000065150, ENSG00000028528, ENSG00000108424, ENSG00000006715, ENSG00000175662, ENSG00000175463, ENSG00000164609, ENSG00000196586, ENSG00000117758, ENSG00000136111, ENSG00000075790, ENSG00000169180, ENSG00000118873, ENSG00000095383, ENSG00000170348, ENSG00000203668, ENSG00000168434, ENSG00000143878, ENSG00000086598, ENSG00000169221, ENSG00000106089, ENSG00000142765, ENSG00000141258, ENSG0000…	1998	236	16792	1.46009	1	0.635918	0.631652
GO:0000460	maturation of 5.8S rRNA	6	0.254561	0.0133836	1.87343	ENSG00000198042, ENSG00000047056, ENSG00000162408, ENSG00000039123, ENSG00000164346, ENSG00000001497	1998	13	16792	3.87896	1	0.638399	0.634117
GO:0034975	protein folding in endoplasmic reticulum	6	0.254561	0.0133836	1.87343	ENSG00000127022, ENSG00000127463, ENSG00000167004, ENSG00000197930, ENSG00000077232, ENSG00000179218	1998	13	16792	3.87896	1	0.638399	0.634117
GO:0006915	apoptotic process	86	3.64871	0.0140788	1.85143	ENSG00000148481, ENSG00000073111, ENSG00000023572, ENSG00000092871, ENSG00000144161, ENSG00000076984, ENSG00000111679, ENSG00000197256, ENSG00000001460, ENSG00000110422, ENSG00000065613, ENSG00000154447, ENSG00000116688, ENSG00000132530, ENSG00000003402, ENSG00000139687, ENSG00000171862, ENSG00000115310, ENSG00000003400, ENSG00000145779, ENSG00000143878, ENSG00000127946, ENSG00000081189, ENSG0000…	1998	567	16792	1.27474	1	0.664909	0.660448
GO:0043044	ATP-dependent chromatin remodeling	8	0.339415	0.0145594	1.83686	ENSG00000196591, ENSG00000092199, ENSG00000100888, ENSG00000173473, ENSG00000073584, ENSG00000117713, ENSG00000111642, ENSG00000163104	1998	23	16792	2.92327	1	0.673301	0.668784
GO:0045022	early endosome to late endosome transport	7	0.296988	0.0146799	1.83328	ENSG00000051009, ENSG00000075785, ENSG00000168172, ENSG00000164715, ENSG00000105186, ENSG00000095066, ENSG00000102189	1998	18	16792	3.26838	1	0.673301	0.668784
GO:0035066	positive regulation of histone acetylation	7	0.296988	0.0146799	1.83328	ENSG00000166164, ENSG00000105329, ENSG00000157212, ENSG00000100784, ENSG00000276234, ENSG00000012048, ENSG00000108773	1998	18	16792	3.26838	1	0.673301	0.668784
GO:0043653	mitochondrial fragmentation involved in apoptotic process	5	0.212134	0.0153336	1.81436	ENSG00000069329, ENSG00000087088, ENSG00000087470, ENSG00000176171, ENSG00000158941	1998	9	16792	4.66911	1	0.677234	0.672691
GO:0042921	glucocorticoid receptor signaling pathway	5	0.212134	0.0153336	1.81436	ENSG00000113580, ENSG00000069869, ENSG00000117713, ENSG00000198646, ENSG00000179218	1998	9	16792	4.66911	1	0.677234	0.672691
GO:0050684	regulation of mRNA processing	5	0.212134	0.0153336	1.81436	ENSG00000163166, ENSG00000137776, ENSG00000130254, ENSG00000248333, ENSG00000008128	1998	9	16792	4.66911	1	0.677234	0.672691
GO:2000786	positive regulation of autophagosome assembly	5	0.212134	0.0153336	1.81436	ENSG00000144118, ENSG00000150867, ENSG00000166908, ENSG00000148356, ENSG00000118873	1998	9	16792	4.66911	1	0.677234	0.672691
GO:0001843	neural tube closure	17	0.721256	0.0176712	1.75273	ENSG00000181555, ENSG00000131759, ENSG00000105329, ENSG00000072062, ENSG00000117713, ENSG00000138802, ENSG00000086598, ENSG00000138182, ENSG00000120868, ENSG00000204138, ENSG00000104290, ENSG00000125753, ENSG00000107882, ENSG00000184634, ENSG00000142875, ENSG00000120254, ENSG00000108773	1998	77	16792	1.85552	1	0.773317	0.768129
GO:0000731	DNA synthesis involved in DNA repair	10	0.424268	0.0185829	1.73089	ENSG00000138376, ENSG00000077514, ENSG00000139618, ENSG00000136492, ENSG00000126215, ENSG00000165392, ENSG00000149311, ENSG00000020922, ENSG00000113522, ENSG00000012048	1998	35	16792	2.40126	1	0.798557	0.7932
GO:0047496	vesicle transport along microtubule	6	0.254561	0.0188151	1.72549	ENSG00000007168, ENSG00000197386, ENSG00000188603, ENSG00000163811, ENSG00000167716, ENSG00000138069	1998	14	16792	3.60189	1	0.798557	0.7932
GO:1901224	positive regulation of NIK/NF-kappaB signaling	6	0.254561	0.0188151	1.72549	ENSG00000149273, ENSG00000056586, ENSG00000135870, ENSG00000189403, ENSG00000179218, ENSG00000092847	1998	14	16792	3.60189	1	0.798557	0.7932
GO:0006413	translational initiation	26	1.1031	0.0189553	1.72227	ENSG00000149273, ENSG00000145592, ENSG00000204574, ENSG00000265681, ENSG00000115211, ENSG00000130255, ENSG00000197728, ENSG00000100664, ENSG00000125691, ENSG00000158417, ENSG00000175376, ENSG00000067048, ENSG00000138326, ENSG00000134001, ENSG00000155506, ENSG00000115268, ENSG00000123908, ENSG00000151247, ENSG00000125977, ENSG00000164163, ENSG00000184110, ENSG00000122406, ENSG00000063046, ENSG0000…	1998	137	16792	1.595	1	0.798557	0.7932
GO:0051298	centrosome duplication	7	0.296988	0.0193419	1.7135	ENSG00000134318, ENSG00000103995, ENSG00000139618, ENSG00000126216, ENSG00000077254, ENSG00000128159, ENSG00000156876	1998	19	16792	3.09636	1	0.798557	0.7932
GO:0030220	platelet formation	7	0.296988	0.0193419	1.7135	ENSG00000071127, ENSG00000072110, ENSG00000081189, ENSG00000111679, ENSG00000112658, ENSG00000100345, ENSG00000179295	1998	19	16792	3.09636	1	0.798557	0.7932
GO:0044255	cellular lipid metabolic process	11	0.466695	0.0194198	1.71175	ENSG00000140396, ENSG00000177565, ENSG00000130589, ENSG00000196498, ENSG00000198646, ENSG00000186951, ENSG00000005339, ENSG00000137574, ENSG00000141027, ENSG00000125686, ENSG00000127511	1998	41	16792	2.25484	1	0.798557	0.7932
GO:0009966	regulation of signal transduction	9	0.381841	0.020884	1.68019	ENSG00000023572, ENSG00000120833, ENSG00000198369, ENSG00000184203, ENSG00000249437, ENSG00000153721, ENSG00000158985, ENSG00000087460, ENSG00000170027	1998	30	16792	2.52132	1	0.851427	0.845715
GO:0006302	double-strand break repair	15	0.636402	0.021499	1.66758	ENSG00000160957, ENSG00000139618, ENSG00000146670, ENSG00000112941, ENSG00000253729, ENSG00000165392, ENSG00000020922, ENSG00000113522, ENSG00000009954, ENSG00000188486, ENSG00000051341, ENSG00000136492, ENSG00000163322, ENSG00000163961, ENSG00000012048	1998	66	16792	1.91009	1	0.869068	0.863238
GO:0007040	lysosome organization	10	0.424268	0.0222364	1.65294	ENSG00000051009, ENSG00000113273, ENSG00000166340, ENSG00000143669, ENSG00000188603, ENSG00000168172, ENSG00000106460, ENSG00000111670, ENSG00000095066, ENSG00000165029	1998	36	16792	2.33456	1	0.891324	0.885344
GO:0070423	nucleotide-binding oligomerization domain containing signaling pathway	8	0.339415	0.0231157	1.63609	ENSG00000134070, ENSG00000157625, ENSG00000124208, ENSG00000100324, ENSG00000244687, ENSG00000078747, ENSG00000177889, ENSG00000055208	1998	25	16792	2.68941	1	0.899075	0.893044
GO:0000184	nuclear-transcribed mRNA catabolic process, nonsense-mediated decay	23	0.975817	0.0231259	1.6359	ENSG00000151461, ENSG00000125691, ENSG00000149273, ENSG00000152332, ENSG00000125351, ENSG00000145592, ENSG00000138326, ENSG00000198952, ENSG00000172795, ENSG00000114503, ENSG00000265681, ENSG00000115268, ENSG00000169062, ENSG00000116698, ENSG00000157106, ENSG00000130255, ENSG00000189266, ENSG00000197728, ENSG00000134030, ENSG00000122406, ENSG00000272886, ENSG00000162244, ENSG00000122026	1998	119	16792	1.62438	1	0.899075	0.893044
GO:0051146	striated muscle cell differentiation	5	0.212134	0.0231837	1.63482	ENSG00000112062, ENSG00000008294, ENSG00000133703, ENSG00000139687, ENSG00000140299	1998	10	16792	4.2022	1	0.899075	0.893044
GO:0050765	negative regulation of phagocytosis	5	0.212134	0.0231837	1.63482	ENSG00000105329, ENSG00000064666, ENSG00000103653, ENSG00000204628, ENSG00000171862	1998	10	16792	4.2022	1	0.899075	0.893044
GO:0010332	response to gamma radiation	9	0.381841	0.0252971	1.59693	ENSG00000225830, ENSG00000139618, ENSG00000171791, ENSG00000087088, ENSG00000253729, ENSG00000081237, ENSG00000133895, ENSG00000132356, ENSG00000140464	1998	31	16792	2.43999	1	0.936255	0.929974
GO:0071479	cellular response to ionizing radiation	9	0.381841	0.0252971	1.59693	ENSG00000173848, ENSG00000112062, ENSG00000164808, ENSG00000143878, ENSG00000105329, ENSG00000171792, ENSG00000104529, ENSG00000114346, ENSG00000134852	1998	31	16792	2.43999	1	0.936255	0.929974
GO:0010659	cardiac muscle cell apoptotic process	4	0.169707	0.0254424	1.59444	ENSG00000140939, ENSG00000120868, ENSG00000078369, ENSG00000080824	1998	6	16792	5.60294	1	0.936255	0.929974
GO:0010606	positive regulation of cytoplasmic mRNA processing body assembly	4	0.169707	0.0254424	1.59444	ENSG00000138767, ENSG00000135473, ENSG00000125107, ENSG00000113300	1998	6	16792	5.60294	1	0.936255	0.929974
GO:1902231	positive regulation of intrinsic apoptotic signaling pathway in response to DNA damage	4	0.169707	0.0254424	1.59444	ENSG00000149273, ENSG00000136603, ENSG00000105229, ENSG00000148411	1998	6	16792	5.60294	1	0.936255	0.929974
GO:1903799	negative regulation of production of miRNAs involved in gene silencing by miRNA	4	0.169707	0.0254424	1.59444	ENSG00000138814, ENSG00000105329, ENSG00000196498, ENSG00000141027	1998	6	16792	5.60294	1	0.936255	0.929974
GO:0007076	mitotic chromosome condensation	6	0.254561	0.0255164	1.59318	ENSG00000136824, ENSG00000105127, ENSG00000116273, ENSG00000146670, ENSG00000113810, ENSG00000112941	1998	15	16792	3.36176	1	0.936255	0.929974
GO:0050852	T cell receptor signaling pathway	27	1.14552	0.0264764	1.57714	ENSG00000213047, ENSG00000185627, ENSG00000172175, ENSG00000149177, ENSG00000076641, ENSG00000081237, ENSG00000244687, ENSG00000171862, ENSG00000240065, ENSG00000177889, ENSG00000100902, ENSG00000159352, ENSG00000100764, ENSG00000103653, ENSG00000082074, ENSG00000050820, ENSG00000124181, ENSG00000204264, ENSG00000041357, ENSG00000026950, ENSG00000124208, ENSG00000203896, ENSG00000108671, ENSG0000…	1998	148	16792	1.53324	1	0.957658	0.951234
GO:0042752	regulation of circadian rhythm	12	0.509122	0.0265144	1.57652	ENSG00000134318, ENSG00000141551, ENSG00000114062, ENSG00000131747, ENSG00000118260, ENSG00000213639, ENSG00000253729, ENSG00000186951, ENSG00000213923, ENSG00000158941, ENSG00000132356, ENSG00000140464	1998	49	16792	2.05822	1	0.957658	0.951234
GO:0030155	regulation of cell adhesion	11	0.466695	0.026702	1.57346	ENSG00000134318, ENSG00000149177, ENSG00000136153, ENSG00000118193, ENSG00000120899, ENSG00000112658, ENSG00000144283, ENSG00000213639, ENSG00000067900, ENSG00000058272, ENSG00000140464	1998	43	16792	2.14996	1	0.957658	0.951234
GO:0051260	protein homooligomerization	31	1.31523	0.0285276	1.54473	ENSG00000021574, ENSG00000172071, ENSG00000178695, ENSG00000114346, ENSG00000179526, ENSG00000173821, ENSG00000119787, ENSG00000008294, ENSG00000087088, ENSG00000015133, ENSG00000166337, ENSG00000184743, ENSG00000163104, ENSG00000134504, ENSG00000026559, ENSG00000160877, ENSG00000104756, ENSG00000104518, ENSG00000047932, ENSG00000139496, ENSG00000120868, ENSG00000110090, ENSG00000051341, ENSG0000…	1998	177	16792	1.47196	1	1	0.9935
GO:0034976	response to endoplasmic reticulum stress	16	0.678829	0.0291674	1.5351	ENSG00000135506, ENSG00000172071, ENSG00000134001, ENSG00000139921, ENSG00000178607, ENSG00000197930, ENSG00000077232, ENSG00000135842, ENSG00000081307, ENSG00000164463, ENSG00000120686, ENSG00000167004, ENSG00000153094, ENSG00000239264, ENSG00000014123, ENSG00000166479	1998	75	16792	1.79294	1	1	0.9935
GO:0030336	negative regulation of cell migration	19	0.806109	0.0299694	1.52332	ENSG00000197381, ENSG00000149177, ENSG00000171791, ENSG00000164938, ENSG00000112658, ENSG00000107937, ENSG00000064666, ENSG00000171862, ENSG00000196712, ENSG00000173402, ENSG00000173611, ENSG00000276644, ENSG00000189079, ENSG00000168675, ENSG00000143878, ENSG00000091039, ENSG00000140526, ENSG00000141522, ENSG00000169504	1998	95	16792	1.68088	1	1	0.9935
GO:0070830	bicellular tight junction assembly	9	0.381841	0.0303208	1.51826	ENSG00000147649, ENSG00000143545, ENSG00000115808, ENSG00000112658, ENSG00000163558, ENSG00000114346, ENSG00000141556, ENSG00000072415, ENSG00000134982	1998	32	16792	2.36374	1	1	0.9935
GO:1900026	positive regulation of substrate adhesion-dependent cell spreading	9	0.381841	0.0303208	1.51826	ENSG00000173848, ENSG00000196924, ENSG00000092929, ENSG00000100106, ENSG00000179218, ENSG00000157764, ENSG00000147459, ENSG00000124782, ENSG00000079805	1998	32	16792	2.36374	1	1	0.9935
GO:0061024	membrane organization	9	0.381841	0.0303208	1.51826	ENSG00000143545, ENSG00000116133, ENSG00000108953, ENSG00000163558, ENSG00000188603, ENSG00000087253, ENSG00000136111, ENSG00000170027, ENSG00000113441	1998	32	16792	2.36374	1	1	0.9935
GO:0042147	retrograde transport, endosome to Golgi	15	0.636402	0.0306974	1.5129	ENSG00000135968, ENSG00000028528, ENSG00000106636, ENSG00000175463, ENSG00000075785, ENSG00000069329, ENSG00000131374, ENSG00000115020, ENSG00000204713, ENSG00000008294, ENSG00000169221, ENSG00000107185, ENSG00000108587, ENSG00000124222, ENSG00000181404	1998	69	16792	1.82704	1	1	0.9935
GO:0006921	cellular component disassembly involved in execution phase of apoptosis	7	0.296988	0.0314697	1.50211	ENSG00000100813, ENSG00000134602, ENSG00000165806, ENSG00000092853, ENSG00000067900, ENSG00000087470, ENSG00000134982	1998	21	16792	2.80147	1	1	0.9935
GO:0032495	response to muramyl dipeptide	5	0.212134	0.0330663	1.48061	ENSG00000112062, ENSG00000091592, ENSG00000148400, ENSG00000112851, ENSG00000101384	1998	11	16792	3.82018	1	1	0.9935
GO:0032206	positive regulation of telomere maintenance	5	0.212134	0.0330663	1.48061	ENSG00000085224, ENSG00000020922, ENSG00000113522, ENSG00000140464, ENSG00000174953	1998	11	16792	3.82018	1	1	0.9935
GO:0051168	nuclear export	5	0.212134	0.0330663	1.48061	ENSG00000041802, ENSG00000172175, ENSG00000114503, ENSG00000124788, ENSG00000165525	1998	11	16792	3.82018	1	1	0.9935
GO:0002446	neutrophil mediated immunity	5	0.212134	0.0330663	1.48061	ENSG00000005483, ENSG00000151694, ENSG00000160712, ENSG00000071127, ENSG00000198001	1998	11	16792	3.82018	1	1	0.9935
GO:0060213	positive regulation of nuclear-transcribed mRNA poly(A) tail shortening	5	0.212134	0.0330663	1.48061	ENSG00000198791, ENSG00000078687, ENSG00000100354, ENSG00000125107, ENSG00000123908	1998	11	16792	3.82018	1	1	0.9935
GO:0035195	gene silencing by miRNA	5	0.212134	0.0330663	1.48061	ENSG00000090905, ENSG00000198791, ENSG00000078687, ENSG00000125107, ENSG00000113300	1998	11	16792	3.82018	1	1	0.9935
GO:0010608	posttranscriptional regulation of gene expression	6	0.254561	0.0335695	1.47406	ENSG00000055917, ENSG00000280987, ENSG00000056586, ENSG00000148411, ENSG00000135870, ENSG00000126775, ENSG00000015479	1998	16	16792	3.15165	1	1	0.9935
GO:0003222	ventricular trabecula myocardium morphogenesis	6	0.254561	0.0335695	1.47406	ENSG00000171316, ENSG00000106799, ENSG00000168214, ENSG00000148400, ENSG00000160973, ENSG00000125686	1998	16	16792	3.15165	1	1	0.9935
GO:0061028	establishment of endothelial barrier	6	0.254561	0.0335695	1.47406	ENSG00000147065, ENSG00000137710, ENSG00000101445, ENSG00000092820, ENSG00000107263, ENSG00000127314	1998	16	16792	3.15165	1	1	0.9935
GO:0030279	negative regulation of ossification	6	0.254561	0.0335695	1.47406	ENSG00000168214, ENSG00000081189, ENSG00000171791, ENSG00000105329, ENSG00000148400, ENSG00000198742	1998	16	16792	3.15165	1	1	0.9935
GO:0032922	circadian regulation of gene expression	13	0.551549	0.033584	1.47387	ENSG00000153187, ENSG00000196591, ENSG00000108557, ENSG00000147162, ENSG00000213639, ENSG00000213923, ENSG00000134852, ENSG00000198900, ENSG00000140396, ENSG00000141551, ENSG00000186951, ENSG00000140464, ENSG00000198380	1998	57	16792	1.91679	1	1	0.9935
GO:0006919	activation of cysteine-type endopeptidase activity involved in apoptotic process	17	0.721256	0.0339537	1.46911	ENSG00000091592, ENSG00000181104, ENSG00000172071, ENSG00000177076, ENSG00000166949, ENSG00000136938, ENSG00000177595, ENSG00000168040, ENSG00000118412, ENSG00000079387, ENSG00000120868, ENSG00000127946, ENSG00000153094, ENSG00000087088, ENSG00000103423, ENSG00000204628, ENSG00000140464	1998	83	16792	1.72138	1	1	0.9935
GO:0007265	Ras protein signal transduction	15	0.636402	0.0343212	1.46444	ENSG00000048028, ENSG00000183856, ENSG00000133703, ENSG00000145907, ENSG00000115325, ENSG00000139687, ENSG00000196712, ENSG00000158987, ENSG00000141068, ENSG00000112062, ENSG00000116133, ENSG00000144118, ENSG00000078369, ENSG00000273217, ENSG00000130816, ENSG00000124782	1998	70	16792	1.80094	1	1	0.9935
GO:0006891	intra-Golgi vesicle-mediated transport	8	0.339415	0.0346177	1.4607	ENSG00000166685, ENSG00000257923, ENSG00000133103, ENSG00000108587, ENSG00000172007, ENSG00000034713, ENSG00000090615, ENSG00000073969	1998	27	16792	2.49019	1	1	0.9935
GO:0007029	endoplasmic reticulum organization	8	0.339415	0.0346177	1.4607	ENSG00000119787, ENSG00000178950, ENSG00000124164, ENSG00000172071, ENSG00000169905, ENSG00000087470, ENSG00000184743, ENSG00000108588	1998	27	16792	2.49019	1	1	0.9935
GO:0070059	intrinsic apoptotic signaling pathway in response to endoplasmic reticulum stress	9	0.381841	0.035988	1.44384	ENSG00000078140, ENSG00000120868, ENSG00000171791, ENSG00000087088, ENSG00000197930, ENSG00000178607, ENSG00000128965, ENSG00000077232, ENSG00000140464	1998	33	16792	2.29211	1	1	0.9935
GO:0002755	MyD88-dependent toll-like receptor signaling pathway	9	0.381841	0.035988	1.44384	ENSG00000134070, ENSG00000157625, ENSG00000145414, ENSG00000136869, ENSG00000010671, ENSG00000198001, ENSG00000100324, ENSG00000174125, ENSG00000055208	1998	33	16792	2.29211	1	1	0.9935
GO:0045454	cell redox homeostasis	16	0.678829	0.0360682	1.44288	ENSG00000104687, ENSG00000198431, ENSG00000023572, ENSG00000139921, ENSG00000197930, ENSG00000077232, ENSG00000196865, ENSG00000112992, ENSG00000165661, ENSG00000165168, ENSG00000167004, ENSG00000087301, ENSG00000100348, ENSG00000167693, ENSG00000239264, ENSG00000166479	1998	77	16792	1.74637	1	1	0.9935
GO:0031398	positive regulation of protein ubiquitination	14	0.593975	0.0361521	1.44187	ENSG00000172175, ENSG00000106305, ENSG00000163904, ENSG00000010072, ENSG00000169252, ENSG00000157212, ENSG00000114062, ENSG00000101966, ENSG00000157450, ENSG00000183255, ENSG00000103423, ENSG00000184675, ENSG00000012048, ENSG00000163743	1998	64	16792	1.83846	1	1	0.9935
GO:0097190	apoptotic signaling pathway	15	0.636402	0.0382438	1.41744	ENSG00000132676, ENSG00000136869, ENSG00000243414, ENSG00000101191, ENSG00000168040, ENSG00000154229, ENSG00000003400, ENSG00000118412, ENSG00000251201, ENSG00000079387, ENSG00000010671, ENSG00000120868, ENSG00000127946, ENSG00000087088, ENSG00000054967	1998	71	16792	1.77558	1	1	0.9935
GO:0032435	negative regulation of proteasomal ubiquitin-dependent protein catabolic process	7	0.296988	0.0390482	1.4084	ENSG00000079387, ENSG00000173473, ENSG00000038532, ENSG00000095787, ENSG00000171100, ENSG00000158941, ENSG00000096384	1998	22	16792	2.67413	1	1	0.9935
GO:1902263	apoptotic process involved in embryonic digit morphogenesis	3	0.12728	0.0390517	1.40836	ENSG00000148400, ENSG00000153094, ENSG00000087088	1998	3	16792	8.4044	1	1	0.9935
GO:0016577	histone demethylation	3	0.12728	0.0390517	1.40836	ENSG00000066135, ENSG00000150347, ENSG00000127663	1998	3	16792	8.4044	1	1	0.9935
GO:0051088	PMA-inducible membrane protein ectodomain proteolysis	3	0.12728	0.0390517	1.40836	ENSG00000151694, ENSG00000137845, ENSG00000168615	1998	3	16792	8.4044	1	1	0.9935
GO:0023051	regulation of signaling	3	0.12728	0.0390517	1.40836	ENSG00000136153, ENSG00000114423, ENSG00000110395	1998	3	16792	8.4044	1	1	0.9935
GO:0090311	regulation of protein deacetylation	3	0.12728	0.0390517	1.40836	ENSG00000166068, ENSG00000198369, ENSG00000158941	1998	3	16792	8.4044	1	1	0.9935
GO:0032487	regulation of Rap protein signal transduction	3	0.12728	0.0390517	1.40836	ENSG00000035862, ENSG00000118193, ENSG00000137710	1998	3	16792	8.4044	1	1	0.9935
GO:1902309	negative regulation of peptidyl-serine dephosphorylation	3	0.12728	0.0390517	1.40836	ENSG00000133789, ENSG00000108953, ENSG00000101445	1998	3	16792	8.4044	1	1	0.9935
GO:0034499	late endosome to Golgi transport	3	0.12728	0.0390517	1.40836	ENSG00000135968, ENSG00000276600, ENSG00000141258	1998	3	16792	8.4044	1	1	0.9935
GO:0006282	regulation of DNA repair	4	0.169707	0.0406368	1.39108	ENSG00000169139, ENSG00000124208, ENSG00000244687, ENSG00000177889	1998	7	16792	4.80252	1	1	0.9935
GO:0032057	negative regulation of translational initiation in response to stress	4	0.169707	0.0406368	1.39108	ENSG00000172071, ENSG00000128829, ENSG00000134001, ENSG00000115211	1998	7	16792	4.80252	1	1	0.9935
GO:0045722	positive regulation of gluconeogenesis	4	0.169707	0.0406368	1.39108	ENSG00000175354, ENSG00000275052, ENSG00000128989, ENSG00000186951	1998	7	16792	4.80252	1	1	0.9935
GO:0036010	protein localization to endosome	4	0.169707	0.0406368	1.39108	ENSG00000100139, ENSG00000112697, ENSG00000100266, ENSG00000114331	1998	7	16792	4.80252	1	1	0.9935
GO:0045931	positive regulation of mitotic cell cycle	8	0.339415	0.0415766	1.38115	ENSG00000007168, ENSG00000139618, ENSG00000101224, ENSG00000154229, ENSG00000179295, ENSG00000147601, ENSG00000151247, ENSG00000108861	1998	28	16792	2.40126	1	1	0.9935
GO:0090503	RNA phosphodiester bond hydrolysis, exonucleolytic	8	0.339415	0.0415766	1.38115	ENSG00000083520, ENSG00000144535, ENSG00000198791, ENSG00000172795, ENSG00000138767, ENSG00000135473, ENSG00000125107, ENSG00000113300	1998	28	16792	2.40126	1	1	0.9935
GO:0010508	positive regulation of autophagy	10	0.424268	0.0419912	1.37684	ENSG00000147649, ENSG00000198382, ENSG00000164938, ENSG00000141569, ENSG00000132274, ENSG00000131374, ENSG00000197548, ENSG00000176171, ENSG00000132356, ENSG00000126775	1998	40	16792	2.1011	1	1	0.9935
GO:0030218	erythrocyte differentiation	10	0.424268	0.0419912	1.37684	ENSG00000005483, ENSG00000064393, ENSG00000100813, ENSG00000180353, ENSG00000162769, ENSG00000175354, ENSG00000113658, ENSG00000185811, ENSG00000122641, ENSG00000113013	1998	40	16792	2.1011	1	1	0.9935
GO:0016573	histone acetylation	9	0.381841	0.0423273	1.37338	ENSG00000140396, ENSG00000083168, ENSG00000125484, ENSG00000156650, ENSG00000168395, ENSG00000147133, ENSG00000134852, ENSG00000005339, ENSG00000276234	1998	34	16792	2.2247	1	1	0.9935
GO:0051571	positive regulation of histone H3-K4 methylation	6	0.254561	0.0430319	1.36621	ENSG00000118513, ENSG00000137815, ENSG00000147162, ENSG00000130816, ENSG00000157212, ENSG00000012048	1998	17	16792	2.96626	1	1	0.9935
GO:0070935	3'-UTR-mediated mRNA stabilization	6	0.254561	0.0430319	1.36621	ENSG00000112062, ENSG00000060138, ENSG00000092199, ENSG00000066044, ENSG00000132819, ENSG00000177733	1998	17	16792	2.96626	1	1	0.9935
GO:0035278	miRNA mediated inhibition of translation	5	0.212134	0.0450411	1.34639	ENSG00000090905, ENSG00000078687, ENSG00000100354, ENSG00000092847, ENSG00000123908	1998	12	16792	3.50184	1	1	0.9935
GO:0040015	negative regulation of multicellular organism growth	5	0.212134	0.0450411	1.34639	ENSG00000043591, ENSG00000108557, ENSG00000169252, ENSG00000116127, ENSG00000087460	1998	12	16792	3.50184	1	1	0.9935
GO:0006368	transcription elongation from RNA polymerase II promoter	17	0.721256	0.0453207	1.3437	ENSG00000110768, ENSG00000181555, ENSG00000047315, ENSG00000137815, ENSG00000114503, ENSG00000006712, ENSG00000064313, ENSG00000130165, ENSG00000090061, ENSG00000011007, ENSG00000082258, ENSG00000165417, ENSG00000126226, ENSG00000147133, ENSG00000149136, ENSG00000166337, ENSG00000165632	1998	86	16792	1.66134	1	1	0.9935
GO:0090090	negative regulation of canonical Wnt signaling pathway	28	1.18795	0.0464938	1.33261	ENSG00000185627, ENSG00000198561, ENSG00000180694, ENSG00000113712, ENSG00000145907, ENSG00000131023, ENSG00000240065, ENSG00000112062, ENSG00000100902, ENSG00000100888, ENSG00000159352, ENSG00000161202, ENSG00000148400, ENSG00000100764, ENSG00000147257, ENSG00000204264, ENSG00000041357, ENSG00000077684, ENSG00000134982, ENSG00000118689, ENSG00000136021, ENSG00000101109, ENSG00000108671, ENSG0000…	1998	163	16792	1.4437	1	1	0.9935
GO:0090398	cellular senescence	7	0.296988	0.0476914	1.32156	ENSG00000083168, ENSG00000140474, ENSG00000188486, ENSG00000112658, ENSG00000169032, ENSG00000179218, ENSG00000140464	1998	23	16792	2.55786	1	1	0.9935
GO:0030521	androgen receptor signaling pathway	10	0.424268	0.0483394	1.3157	ENSG00000114062, ENSG00000013561, ENSG00000115548, ENSG00000117713, ENSG00000184634, ENSG00000139687, ENSG00000054118, ENSG00000012048, ENSG00000033800, ENSG00000125686	1998	41	16792	2.04985	1	1	0.9935
GO:0000281	mitotic cytokinesis	8	0.339415	0.0493821	1.30643	ENSG00000021574, ENSG00000136108, ENSG00000138592, ENSG00000115306, ENSG00000138180, ENSG00000101421, ENSG00000161800, ENSG00000134982	1998	29	16792	2.31846	1	1	0.9935
GO:0048873	homeostasis of number of cells within a tissue	8	0.339415	0.0493821	1.30643	ENSG00000181104, ENSG00000171791, ENSG00000133703, ENSG00000122122, ENSG00000087088, ENSG00000204120, ENSG00000179295, ENSG00000133863	1998	29	16792	2.31846	1	1	0.9935
GO:0043928	exonucleolytic nuclear-transcribed mRNA catabolic process involved in deadenylation-dependent decay	8	0.339415	0.0493821	1.30643	ENSG00000083520, ENSG00000223496, ENSG00000198791, ENSG00000130713, ENSG00000172795, ENSG00000170860, ENSG00000272886, ENSG00000113300	1998	29	16792	2.31846	1	1	0.9935
GO:0046777	protein autophosphorylation	29	1.23038	0.0521814	1.28248	ENSG00000172071, ENSG00000115977, ENSG00000072062, ENSG00000065613, ENSG00000037280, ENSG00000081320, ENSG00000173517, ENSG00000103319, ENSG00000120899, ENSG00000072518, ENSG00000147133, ENSG00000164715, ENSG00000149311, ENSG00000103653, ENSG00000152332, ENSG00000134602, ENSG00000110931, ENSG00000134001, ENSG00000133275, ENSG00000157540, ENSG00000178607, ENSG00000157106, ENSG00000140474, ENSG0000…	1998	172	16792	1.41702	1	1	0.9935
GO:0000910	cytokinesis	11	0.466695	0.0529838	1.27586	ENSG00000134318, ENSG00000144118, ENSG00000122545, ENSG00000143878, ENSG00000139618, ENSG00000100345, ENSG00000151414, ENSG00000114346, ENSG00000153207, ENSG00000198901, ENSG00000149503	1998	48	16792	1.92601	1	1	0.9935
GO:0007020	microtubule nucleation	6	0.254561	0.0539365	1.26812	ENSG00000141551, ENSG00000163539, ENSG00000151849, ENSG00000126216, ENSG00000074054, ENSG00000128159	1998	18	16792	2.80147	1	1	0.9935
GO:0071577	zinc II ion transmembrane transport	6	0.254561	0.0539365	1.26812	ENSG00000152683, ENSG00000133195, ENSG00000142185, ENSG00000112473, ENSG00000141424, ENSG00000141873	1998	18	16792	2.80147	1	1	0.9935
GO:0001782	B cell homeostasis	6	0.254561	0.0539365	1.26812	ENSG00000081189, ENSG00000171791, ENSG00000056586, ENSG00000153094, ENSG00000087088, ENSG00000135870	1998	18	16792	2.80147	1	1	0.9935
GO:0006261	DNA-dependent DNA replication	6	0.254561	0.0539365	1.26812	ENSG00000077514, ENSG00000129197, ENSG00000035928, ENSG00000051341, ENSG00000132383, ENSG00000198604	1998	18	16792	2.80147	1	1	0.9935
GO:0034142	toll-like receptor 4 signaling pathway	6	0.254561	0.0539365	1.26812	ENSG00000136869, ENSG00000251201, ENSG00000168961, ENSG00000169896, ENSG00000243414, ENSG00000160255	1998	18	16792	2.80147	1	1	0.9935
GO:0060324	face development	6	0.254561	0.0539365	1.26812	ENSG00000171316, ENSG00000131759, ENSG00000112658, ENSG00000125863, ENSG00000169032, ENSG00000157764	1998	18	16792	2.80147	1	1	0.9935
GO:0009725	response to hormone	10	0.424268	0.0552905	1.25735	ENSG00000116133, ENSG00000131788, ENSG00000035862, ENSG00000180353, ENSG00000120899, ENSG00000083720, ENSG00000112658, ENSG00000100348, ENSG00000198646, ENSG00000157227	1998	42	16792	2.00105	1	1	0.9935
GO:0007049	cell cycle	35	1.48494	0.05621	1.25019	ENSG00000178950, ENSG00000155254, ENSG00000073111, ENSG00000069956, ENSG00000075131, ENSG00000138758, ENSG00000060339, ENSG00000158941, ENSG00000196504, ENSG00000118971, ENSG00000172534, ENSG00000118412, ENSG00000086712, ENSG00000082258, ENSG00000147133, ENSG00000103479, ENSG00000185811, ENSG00000169727, ENSG00000107551, ENSG00000011454, ENSG00000012048, ENSG00000123485, ENSG00000132522, ENSG0000…	1998	217	16792	1.35555	1	1	0.9935
GO:0006405	RNA export from nucleus	12	0.509122	0.0565417	1.24763	ENSG00000058673, ENSG00000133226, ENSG00000125351, ENSG00000198563, ENSG00000164609, ENSG00000063244, ENSG00000125676, ENSG00000114503, ENSG00000196313, ENSG00000116754, ENSG00000151247, ENSG00000168438	1998	55	16792	1.83369	1	1	0.9935
GO:0048536	spleen development	9	0.381841	0.0571131	1.24326	ENSG00000151694, ENSG00000162769, ENSG00000171791, ENSG00000056586, ENSG00000153094, ENSG00000126226, ENSG00000135870, ENSG00000168040, ENSG00000253729	1998	36	16792	2.1011	1	1	0.9935
GO:0000723	telomere maintenance	9	0.381841	0.0571131	1.24326	ENSG00000067066, ENSG00000077514, ENSG00000164362, ENSG00000132383, ENSG00000165392, ENSG00000149311, ENSG00000113522, ENSG00000147601, ENSG00000157106	1998	36	16792	2.1011	1	1	0.9935
GO:1900034	regulation of cellular response to heat	15	0.636402	0.0571297	1.24314	ENSG00000105993, ENSG00000153201, ENSG00000108953, ENSG00000132383, ENSG00000196313, ENSG00000005339, ENSG00000158941, ENSG00000096384, ENSG00000080824, ENSG00000168259, ENSG00000139496, ENSG00000110172, ENSG00000124789, ENSG00000132182, ENSG00000149311	1998	75	16792	1.68088	1	1	0.9935
GO:0000956	nuclear-transcribed mRNA catabolic process	5	0.212134	0.0591111	1.22833	ENSG00000053372, ENSG00000135870, ENSG00000114127, ENSG00000092847, ENSG00000054118	1998	13	16792	3.23246	1	1	0.9935
GO:2001275	positive regulation of glucose import in response to insulin stimulus	5	0.212134	0.0591111	1.22833	ENSG00000135828, ENSG00000091039, ENSG00000111731, ENSG00000179295, ENSG00000105221	1998	13	16792	3.23246	1	1	0.9935
GO:0006623	protein targeting to vacuole	4	0.169707	0.0593818	1.22635	ENSG00000129003, ENSG00000197969, ENSG00000006715, ENSG00000048707	1998	8	16792	4.2022	1	1	0.9935
GO:2000781	positive regulation of double-strand break repair	4	0.169707	0.0593818	1.22635	ENSG00000164808, ENSG00000119906, ENSG00000013573, ENSG00000133302	1998	8	16792	4.2022	1	1	0.9935
GO:0060261	positive regulation of transcription initiation from RNA polymerase II promoter	4	0.169707	0.0593818	1.22635	ENSG00000140968, ENSG00000112658, ENSG00000147133, ENSG00000157212	1998	8	16792	4.2022	1	1	0.9935
GO:0006610	ribosomal protein import into nucleus	4	0.169707	0.0593818	1.22635	ENSG00000065150, ENSG00000125691, ENSG00000108424, ENSG00000083312	1998	8	16792	4.2022	1	1	0.9935
GO:0033601	positive regulation of mammary gland epithelial cell proliferation	4	0.169707	0.0593818	1.22635	ENSG00000183779, ENSG00000183856, ENSG00000124782, ENSG00000125686	1998	8	16792	4.2022	1	1	0.9935
GO:0006903	vesicle targeting	4	0.169707	0.0593818	1.22635	ENSG00000163539, ENSG00000106636, ENSG00000118308, ENSG00000074054	1998	8	16792	4.2022	1	1	0.9935
GO:0022612	gland morphogenesis	4	0.169707	0.0593818	1.22635	ENSG00000147065, ENSG00000171791, ENSG00000092820, ENSG00000181690	1998	8	16792	4.2022	1	1	0.9935
GO:0002467	germinal center formation	4	0.169707	0.0593818	1.22635	ENSG00000151694, ENSG00000092929, ENSG00000081189, ENSG00000172578	1998	8	16792	4.2022	1	1	0.9935
GO:0051726	regulation of cell cycle	22	0.93339	0.0596605	1.22431	ENSG00000197381, ENSG00000183779, ENSG00000064393, ENSG00000156256, ENSG00000150093, ENSG00000117724, ENSG00000081237, ENSG00000171862, ENSG00000139687, ENSG00000008128, ENSG00000112144, ENSG00000175305, ENSG00000248333, ENSG00000086712, ENSG00000144744, ENSG00000008086, ENSG00000204138, ENSG00000118816, ENSG00000103479, ENSG00000149311, ENSG00000204628, ENSG00000125686	1998	124	16792	1.4911	1	1	0.9935
GO:0006325	chromatin organization	10	0.424268	0.062858	1.20164	ENSG00000069275, ENSG00000145391, ENSG00000140382, ENSG00000111642, ENSG00000170004, ENSG00000156802, ENSG00000160953, ENSG00000164104, ENSG00000163104, ENSG00000001497	1998	43	16792	1.95451	1	1	0.9935
GO:0034260	negative regulation of GTPase activity	10	0.424268	0.062858	1.20164	ENSG00000065150, ENSG00000132522, ENSG00000086598, ENSG00000137710, ENSG00000179051, ENSG00000125863, ENSG00000198855, ENSG00000066777, ENSG00000155093, ENSG00000169727	1998	43	16792	1.95451	1	1	0.9935
GO:0045665	negative regulation of neuron differentiation	12	0.509122	0.0631259	1.19979	ENSG00000118689, ENSG00000128829, ENSG00000140382, ENSG00000066279, ENSG00000136861, ENSG00000177508, ENSG00000179218, ENSG00000084093, ENSG00000159556, ENSG00000151247, ENSG00000125686, ENSG00000101384	1998	56	16792	1.80094	1	1	0.9935
GO:0043524	negative regulation of neuron apoptotic process	23	0.975817	0.0634931	1.19727	ENSG00000132688, ENSG00000181104, ENSG00000101152, ENSG00000064393, ENSG00000133703, ENSG00000118193, ENSG00000171791, ENSG00000067900, ENSG00000249437, ENSG00000157764, ENSG00000096384, ENSG00000119335, ENSG00000166333, ENSG00000169139, ENSG00000205726, ENSG00000120899, ENSG00000081189, ENSG00000164362, ENSG00000087088, ENSG00000163558, ENSG00000188603, ENSG00000164830, ENSG00000140992	1998	132	16792	1.4644	1	1	0.9935
GO:0006310	DNA recombination	16	0.678829	0.0636998	1.19586	ENSG00000160957, ENSG00000129197, ENSG00000114933, ENSG00000113812, ENSG00000132383, ENSG00000198646, ENSG00000165392, ENSG00000157212, ENSG00000020922, ENSG00000113522, ENSG00000168214, ENSG00000280789, ENSG00000085224, ENSG00000126215, ENSG00000189403, ENSG00000012048	1998	83	16792	1.62013	1	1	0.9935
GO:0001894	tissue homeostasis	6	0.254561	0.0662918	1.17854	ENSG00000167522, ENSG00000138376, ENSG00000260428, ENSG00000278540, ENSG00000139687, ENSG00000087460	1998	19	16792	2.65402	1	1	0.9935
GO:0042795	snRNA transcription from RNA polymerase II promoter	14	0.593975	0.0673824	1.17145	ENSG00000047315, ENSG00000144161, ENSG00000108506, ENSG00000114503, ENSG00000173559, ENSG00000090061, ENSG00000143624, ENSG00000082258, ENSG00000164151, ENSG00000128915, ENSG00000165417, ENSG00000101413, ENSG00000102786, ENSG00000164941	1998	70	16792	1.68088	1	1	0.9935
GO:0000375	RNA splicing, via transesterification reactions	7	0.296988	0.0682584	1.16584	ENSG00000060688, ENSG00000119953, ENSG00000133226, ENSG00000164609, ENSG00000139218, ENSG00000183431, ENSG00000188529	1998	25	16792	2.35323	1	1	0.9935
GO:0022604	regulation of cell morphogenesis	7	0.296988	0.0682584	1.16584	ENSG00000186174, ENSG00000161813, ENSG00000130559, ENSG00000147130, ENSG00000146463, ENSG00000121741, ENSG00000146247	1998	25	16792	2.35323	1	1	0.9935
GO:0001578	microtubule bundle formation	7	0.296988	0.0682584	1.16584	ENSG00000167566, ENSG00000021574, ENSG00000130779, ENSG00000136861, ENSG00000074054, ENSG00000198901, ENSG00000107771	1998	25	16792	2.35323	1	1	0.9935
GO:2000134	negative regulation of G1/S transition of mitotic cell cycle	7	0.296988	0.0682584	1.16584	ENSG00000166164, ENSG00000171791, ENSG00000165891, ENSG00000197256, ENSG00000077684, ENSG00000171862, ENSG00000139687	1998	25	16792	2.35323	1	1	0.9935
GO:0032091	negative regulation of protein binding	12	0.509122	0.0701903	1.15372	ENSG00000132688, ENSG00000144118, ENSG00000167895, ENSG00000139372, ENSG00000163904, ENSG00000087088, ENSG00000067900, ENSG00000077254, ENSG00000186951, ENSG00000213923, ENSG00000013573, ENSG00000142655	1998	57	16792	1.76935	1	1	0.9935
GO:0034644	cellular response to UV	10	0.424268	0.0710517	1.14843	ENSG00000048028, ENSG00000128829, ENSG00000164938, ENSG00000126804, ENSG00000134001, ENSG00000087088, ENSG00000069869, ENSG00000171792, ENSG00000147133, ENSG00000005339	1998	44	16792	1.91009	1	1	0.9935
GO:1902115	regulation of organelle assembly	3	0.12728	0.0719828	1.14277	ENSG00000147065, ENSG00000137710, ENSG00000092820	1998	4	16792	6.3033	1	1	0.9935
GO:1904504	positive regulation of lipophagy	3	0.12728	0.0719828	1.14277	ENSG00000090054, ENSG00000197386, ENSG00000169252	1998	4	16792	6.3033	1	1	0.9935
GO:0031507	heterochromatin assembly	3	0.12728	0.0719828	1.14277	ENSG00000140320, ENSG00000182095, ENSG00000266074	1998	4	16792	6.3033	1	1	0.9935
GO:0035522	monoubiquitinated histone H2A deubiquitination	3	0.12728	0.0719828	1.14277	ENSG00000156256, ENSG00000162601, ENSG00000171456	1998	4	16792	6.3033	1	1	0.9935
GO:0032436	positive regulation of proteasomal ubiquitin-dependent protein catabolic process	13	0.551549	0.072397	1.14028	ENSG00000113712, ENSG00000213923, ENSG00000169139, ENSG00000141551, ENSG00000166233, ENSG00000143207, ENSG00000013561, ENSG00000013374, ENSG00000124226, ENSG00000147133, ENSG00000204628, ENSG00000033800, ENSG00000163743	1998	64	16792	1.70714	1	1	0.9935
GO:0071277	cellular response to calcium ion	11	0.466695	0.0749735	1.12509	ENSG00000198363, ENSG00000125648, ENSG00000103319, ENSG00000142185, ENSG00000081189, ENSG00000068305, ENSG00000085719, ENSG00000114346, ENSG00000157764, ENSG00000143772, ENSG00000169504	1998	51	16792	1.81271	1	1	0.9935
GO:1902043	positive regulation of extrinsic apoptotic signaling pathway via death domain receptors	5	0.212134	0.0752294	1.12361	ENSG00000136603, ENSG00000101109, ENSG00000177595, ENSG00000168040, ENSG00000196712	1998	14	16792	3.00157	1	1	0.9935
GO:1900153	positive regulation of nuclear-transcribed mRNA catabolic process, deadenylation-dependent decay	5	0.212134	0.0752294	1.12361	ENSG00000198791, ENSG00000078687, ENSG00000100354, ENSG00000125107, ENSG00000123908	1998	14	16792	3.00157	1	1	0.9935
GO:0007064	mitotic sister chromatid cohesion	5	0.212134	0.0752294	1.12361	ENSG00000072501, ENSG00000146670, ENSG00000108055, ENSG00000143442, ENSG00000121892	1998	14	16792	3.00157	1	1	0.9935
GO:0043254	regulation of protein complex assembly	5	0.212134	0.0752294	1.12361	ENSG00000179295, ENSG00000131023, ENSG00000123485, ENSG00000080824, ENSG00000172534	1998	14	16792	3.00157	1	1	0.9935
GO:0043409	negative regulation of MAPK cascade	5	0.212134	0.0752294	1.12361	ENSG00000163162, ENSG00000161904, ENSG00000196712, ENSG00000173402, ENSG00000108861	1998	14	16792	3.00157	1	1	0.9935
GO:0035335	peptidyl-tyrosine dephosphorylation	18	0.763683	0.0755417	1.12181	ENSG00000149177, ENSG00000175354, ENSG00000111679, ENSG00000076201, ENSG00000171100, ENSG00000158079, ENSG00000111266, ENSG00000139505, ENSG00000081237, ENSG00000171862, ENSG00000172830, ENSG00000132334, ENSG00000141298, ENSG00000063601, ENSG00000101224, ENSG00000155093, ENSG00000179295, ENSG00000108861	1998	99	16792	1.52807	1	1	0.9935
GO:0000722	telomere maintenance via recombination	8	0.339415	0.0780508	1.10762	ENSG00000077514, ENSG00000139618, ENSG00000035928, ENSG00000132383, ENSG00000126215, ENSG00000111445, ENSG00000165392, ENSG00000113522	1998	32	16792	2.1011	1	1	0.9935
GO:0043087	regulation of GTPase activity	13	0.551549	0.0796296	1.09893	ENSG00000183856, ENSG00000133812, ENSG00000146192, ENSG00000137710, ENSG00000196712, ENSG00000075391, ENSG00000118873, ENSG00000158987, ENSG00000007168, ENSG00000169221, ENSG00000164327, ENSG00000165219, ENSG00000130827, ENSG00000273217	1998	65	16792	1.68088	1	1	0.9935
GO:0043984	histone H4-K16 acetylation	6	0.254561	0.0800831	1.09646	ENSG00000025293, ENSG00000188895, ENSG00000147162, ENSG00000077684, ENSG00000144445, ENSG00000172534	1998	20	16792	2.52132	1	1	0.9935
GO:0008361	regulation of cell size	6	0.254561	0.0800831	1.09646	ENSG00000183856, ENSG00000147065, ENSG00000047597, ENSG00000118260, ENSG00000137710, ENSG00000092820	1998	20	16792	2.52132	1	1	0.9935
GO:0007097	nuclear migration	4	0.169707	0.0814059	1.08934	ENSG00000007168, ENSG00000132912, ENSG00000163811, ENSG00000167716	1998	9	16792	3.73529	1	1	0.9935
GO:0035372	protein localization to microtubule	4	0.169707	0.0814059	1.08934	ENSG00000138182, ENSG00000131504, ENSG00000101367, ENSG00000198824	1998	9	16792	3.73529	1	1	0.9935
GO:0035308	negative regulation of protein dephosphorylation	4	0.169707	0.0814059	1.08934	ENSG00000108953, ENSG00000128989, ENSG00000101445, ENSG00000143420	1998	9	16792	3.73529	1	1	0.9935
GO:0032886	regulation of microtubule-based process	4	0.169707	0.0814059	1.08934	ENSG00000131504, ENSG00000163539, ENSG00000127603, ENSG00000134982	1998	9	16792	3.73529	1	1	0.9935
GO:0008635	activation of cysteine-type endopeptidase activity involved in apoptotic process by cytochrome c	4	0.169707	0.0814059	1.08934	ENSG00000165806, ENSG00000120868, ENSG00000087088, ENSG00000172115	1998	9	16792	3.73529	1	1	0.9935
GO:0070933	histone H4 deacetylation	4	0.169707	0.0814059	1.08934	ENSG00000196591, ENSG00000048052, ENSG00000084093, ENSG00000163104	1998	9	16792	3.73529	1	1	0.9935
GO:0006265	DNA topological change	4	0.169707	0.0814059	1.08934	ENSG00000131747, ENSG00000189403, ENSG00000164104, ENSG00000198900	1998	9	16792	3.73529	1	1	0.9935
GO:0048096	chromatin-mediated maintenance of transcription	4	0.169707	0.0814059	1.08934	ENSG00000117713, ENSG00000130165, ENSG00000009954, ENSG00000272333	1998	9	16792	3.73529	1	1	0.9935
GO:0046474	glycerophospholipid biosynthetic process	4	0.169707	0.0814059	1.08934	ENSG00000254413, ENSG00000085719, ENSG00000100288, ENSG00000197601	1998	9	16792	3.73529	1	1	0.9935
GO:0051607	defense response to virus	27	1.14552	0.0815016	1.08883	ENSG00000135828, ENSG00000241258, ENSG00000111335, ENSG00000081237, ENSG00000132274, ENSG00000092929, ENSG00000183258, ENSG00000176171, ENSG00000161204, ENSG00000140464, ENSG00000105497, ENSG00000197381, ENSG00000132824, ENSG00000074356, ENSG00000171791, ENSG00000170581, ENSG00000134321, ENSG00000168040, ENSG00000117226, ENSG00000197548, ENSG00000132664, ENSG00000143669, ENSG00000128829, ENSG0000…	1998	165	16792	1.37527	1	1	0.9935
GO:0090630	activation of GTPase activity	15	0.636402	0.0815222	1.08872	ENSG00000126353, ENSG00000175463, ENSG00000170471, ENSG00000114346, ENSG00000136111, ENSG00000131374, ENSG00000095383, ENSG00000120899, ENSG00000169221, ENSG00000100664, ENSG00000188559, ENSG00000179051, ENSG00000141258, ENSG00000105221, ENSG00000011454	1998	79	16792	1.59577	1	1	0.9935
GO:0010628	positive regulation of gene expression	40	1.69707	0.0819707	1.08634	ENSG00000149273, ENSG00000134318, ENSG00000131788, ENSG00000172071, ENSG00000069974, ENSG00000105810, ENSG00000166949, ENSG00000133703, ENSG00000064666, ENSG00000132356, ENSG00000172534, ENSG00000112062, ENSG00000086598, ENSG00000260428, ENSG00000081189, ENSG00000092820, ENSG00000125686, ENSG00000012048, ENSG00000183856, ENSG00000197063, ENSG00000136869, ENSG00000106799, ENSG00000153187, ENSG0000…	1998	262	16792	1.28312	1	1	0.9935
GO:0006417	regulation of translation	11	0.466695	0.0834014	1.07883	ENSG00000120963, ENSG00000118689, ENSG00000164024, ENSG00000170515, ENSG00000080608, ENSG00000105221, ENSG00000149657, ENSG00000257103, ENSG00000151247, ENSG00000115211, ENSG00000132300	1998	52	16792	1.77785	1	1	0.9935
GO:0035264	multicellular organism growth	15	0.636402	0.0885228	1.05295	ENSG00000177565, ENSG00000162769, ENSG00000131759, ENSG00000150347, ENSG00000204120, ENSG00000181690, ENSG00000167522, ENSG00000225830, ENSG00000086598, ENSG00000085224, ENSG00000056586, ENSG00000179295, ENSG00000169504, ENSG00000108773, ENSG00000087460	1998	80	16792	1.57583	1	1	0.9935
GO:0001558	regulation of cell growth	15	0.636402	0.0885228	1.05295	ENSG00000104205, ENSG00000118193, ENSG00000072274, ENSG00000172007, ENSG00000139687, ENSG00000138688, ENSG00000008128, ENSG00000248333, ENSG00000173848, ENSG00000167895, ENSG00000120833, ENSG00000060491, ENSG00000078747, ENSG00000147654, ENSG00000050820	1998	80	16792	1.57583	1	1	0.9935
GO:0042552	myelination	10	0.424268	0.0893374	1.04897	ENSG00000133812, ENSG00000088812, ENSG00000198121, ENSG00000155254, ENSG00000047597, ENSG00000105329, ENSG00000112531, ENSG00000172466, ENSG00000103740, ENSG00000115211	1998	46	16792	1.82704	1	1	0.9935
GO:0016575	histone deacetylation	10	0.424268	0.0893374	1.04897	ENSG00000177565, ENSG00000196591, ENSG00000054267, ENSG00000148411, ENSG00000135365, ENSG00000048052, ENSG00000111642, ENSG00000170004, ENSG00000164576, ENSG00000127511	1998	46	16792	1.82704	1	1	0.9935
GO:0070979	protein K11-linked ubiquitination	7	0.296988	0.0932145	1.03052	ENSG00000104343, ENSG00000186591, ENSG00000077721, ENSG00000196510, ENSG00000130177, ENSG00000004897, ENSG00000089053	1998	27	16792	2.17892	1	1	0.9935
GO:0002437	inflammatory response to antigenic stimulus	5	0.212134	0.0933069	1.03009	ENSG00000168214, ENSG00000173198, ENSG00000148400, ENSG00000189403, ENSG00000164104	1998	15	16792	2.80147	1	1	0.9935
GO:0045947	negative regulation of translational initiation	5	0.212134	0.0933069	1.03009	ENSG00000128829, ENSG00000131759, ENSG00000148730, ENSG00000123908, ENSG00000115211	1998	15	16792	2.80147	1	1	0.9935
GO:0006646	phosphatidylethanolamine biosynthetic process	5	0.212134	0.0933069	1.03009	ENSG00000139163, ENSG00000134255, ENSG00000101577, ENSG00000100288, ENSG00000134324	1998	15	16792	2.80147	1	1	0.9935
GO:0000470	maturation of LSU-rRNA	5	0.212134	0.0933069	1.03009	ENSG00000198042, ENSG00000136891, ENSG00000047056, ENSG00000164346, ENSG00000001497	1998	15	16792	2.80147	1	1	0.9935
GO:0014898	cardiac muscle hypertrophy in response to stress	5	0.212134	0.0933069	1.03009	ENSG00000138814, ENSG00000081189, ENSG00000066135, ENSG00000108509, ENSG00000198825	1998	15	16792	2.80147	1	1	0.9935
GO:0045055	regulated exocytosis	5	0.212134	0.0933069	1.03009	ENSG00000101152, ENSG00000170348, ENSG00000156675, ENSG00000006715, ENSG00000107560	1998	15	16792	2.80147	1	1	0.9935
GO:0000132	establishment of mitotic spindle orientation	6	0.254561	0.0952748	1.02102	ENSG00000007168, ENSG00000197386, ENSG00000163811, ENSG00000136861, ENSG00000167716, ENSG00000137497	1998	21	16792	2.40126	1	1	0.9935
GO:0001889	liver development	14	0.593975	0.0958929	1.01821	ENSG00000151461, ENSG00000198563, ENSG00000166949, ENSG00000133703, ENSG00000131759, ENSG00000150347, ENSG00000025796, ENSG00000196712, ENSG00000172845, ENSG00000117054, ENSG00000148400, ENSG00000100522, ENSG00000197081, ENSG00000125686	1998	74	16792	1.59002	1	1	0.9935
GO:0030334	regulation of cell migration	14	0.593975	0.0958929	1.01821	ENSG00000104205, ENSG00000118193, ENSG00000105329, ENSG00000076201, ENSG00000065613, ENSG00000115310, ENSG00000196924, ENSG00000143878, ENSG00000179051, ENSG00000162601, ENSG00000130827, ENSG00000105221, ENSG00000107201, ENSG00000101384	1998	74	16792	1.59002	1	1	0.9935
GO:0007584	response to nutrient	14	0.593975	0.0958929	1.01821	ENSG00000068366, ENSG00000147162, ENSG00000171862, ENSG00000131143, ENSG00000006831, ENSG00000113273, ENSG00000010310, ENSG00000165168, ENSG00000120868, ENSG00000083720, ENSG00000100348, ENSG00000100299, ENSG00000143420, ENSG00000165029	1998	74	16792	1.59002	1	1	0.9935
GO:0042981	regulation of apoptotic process	33	1.40008	0.0971354	1.01262	ENSG00000149273, ENSG00000140939, ENSG00000172175, ENSG00000130513, ENSG00000104205, ENSG00000065613, ENSG00000003402, ENSG00000115310, ENSG00000003400, ENSG00000127946, ENSG00000119707, ENSG00000087088, ENSG00000149311, ENSG00000054967, ENSG00000050820, ENSG00000012048, ENSG00000136603, ENSG00000134602, ENSG00000072110, ENSG00000105329, ENSG00000177595, ENSG00000164938, ENSG00000168040, ENSG0000…	1998	213	16792	1.30209	1	1	0.9935
GO:0008630	intrinsic apoptotic signaling pathway in response to DNA damage	10	0.424268	0.0994294	1.00249	ENSG00000225830, ENSG00000171791, ENSG00000153094, ENSG00000087088, ENSG00000253729, ENSG00000143384, ENSG00000076242, ENSG00000149311, ENSG00000012048, ENSG00000140464	1998	47	16792	1.78817	1	1	0.9935
					#NUM!
					#NUM!
					#NUM!
					#NUM!
					#NUM!
					#NUM!
					#NUM!
					#NUM!
					#NUM!
					#NUM!
					#NUM!
					#NUM!
					#NUM!
					#NUM!
					#NUM!
					#NUM!
					#NUM!
					#NUM!
					#NUM!
					#NUM!
					#NUM!
					#NUM!
					#NUM!
					#NUM!
					#NUM!
					#NUM!
					#NUM!
					#NUM!
